# Supplementary material for: In silico modelling of chelate stabilized tetrylene derivatives
Source: Royal Society of Chemistry journal article supplement (doi:10.1039/d4ra01515k), 2024-01-01
Supplement: d4ra01515k1.pdf [file d4ra01515k1.pdf]

## Electronic Supplementary Information

### *In Silico Modelling of Chelate Stabilized Tetrylene Derivatives*

Alex-Cristian Tomut, Iulia-Andreea Aghion, Raluca Septelean, Ioan-Dan Porumb,  
Ionut-Tudor Moraru\* and Gabriela Nemes\*

*Faculty of Chemistry and Chemical Engineering, Department of Chemistry,  
Babeş-Bolyai University, 1 M. Kogalniceanu Street, RO-400084 Cluj-Napoca, Romania*

*E-mail: [ionut.moraru@ubbcluj.ro](mailto:ionut.moraru@ubbcluj.ro); [gabriela.nemes@ubbcluj.ro](mailto:gabriela.nemes@ubbcluj.ro)*

### Table of Contents

|                                      |    |
|--------------------------------------|----|
| <b>PCPX systems</b> .....            | 2  |
| <b>Table S1.</b> .....               | 2  |
| <b>PCPX-E(II) systems</b> .....      | 3  |
| <b>Table S2.</b> .....               | 3  |
| <b>Table S3.</b> .....               | 4  |
| <b>Table S4.</b> .....               | 5  |
| <b>Table S5.</b> .....               | 6  |
| <b>Table S6.</b> .....               | 7  |
| <b>Figure S1.</b> .....              | 7  |
| <b>Figure S2.</b> .....              | 7  |
| <b>Table S7.</b> .....               | 8  |
| <b>Table S8.</b> .....               | 8  |
| <b>PCPX-E(II)-AuCl systems</b> ..... | 9  |
| <b>Table S9.</b> .....               | 9  |
| <b>Table S10.</b> .....              | 9  |
| <b>Table S11.</b> .....              | 10 |
| <b>Table S12.</b> .....              | 10 |
| <b>Table S13.</b> .....              | 11 |
| <b>Table S14.</b> .....              | 11 |
| <b>Table S15.</b> .....              | 12 |
| <b>Table S16.</b> .....              | 12 |
| <b>Table S17.</b> .....              | 13 |
| <b>Table S18.</b> .....              | 13 |
| <b>Table S19.</b> .....              | 14 |
| <b>Table S20.</b> .....              | 14 |
| <b>Table S21.</b> .....              | 15 |

## PCPX systems

**Table S1.** Selection of the most relevant geometrical parameters computed for model  $RP=C(Cl)-P(X)RR'$  derivatives incorporating the  $P=C(Cl)-P=X$  ( $X = O$  or  $S$ ) moiety.

| R    | R' | PCPO    |         |         |           |           | PCPS    |         |         |           |           |
|------|----|---------|---------|---------|-----------|-----------|---------|---------|---------|-----------|-----------|
|      |    | P=C (Å) | C-P (Å) | P=O (Å) | C-P=O (°) | P=C-P (°) | P=C (Å) | C-P (Å) | P=S (Å) | C-P=S (°) | P=C-P (°) |
| H    | Me | 1.671   | 1.814   | 1.474   | 113.2     | 117.9     | 1.674   | 1.822   | 1.925   | 115.9     | 118.6     |
|      | Cl | 1.673   | 1.802   | 1.463   | 114.6     | 117.1     | 1.675   | 1.811   | 1.903   | 117.1     | 116.9     |
| Me   | Me | 1.672   | 1.815   | 1.477   | 111.7     | 117.4     | 1.673   | 1.818   | 1.934   | 113.0     | 118.8     |
|      | Cl | 1.674   | 1.802   | 1.466   | 112.9     | 116.5     | 1.675   | 1.809   | 1.913   | 114.4     | 117.9     |
| t-Bu | Me | 1.674   | 1.827   | 1.481   | 110.5     | 114.2     | 1.674   | 1.834   | 1.942   | 112.4     | 116.2     |
|      | Cl | 1.676   | 1.817   | 1.469   | 111.6     | 113.0     | 1.678   | 1.828   | 1.921   | 113.1     | 114.6     |
| Ph   | Me | 1.676   | 1.819   | 1.479   | 111.0     | 115.1     | 1.677   | 1.826   | 1.937   | 112.5     | 116.9     |
|      | Cl | 1.678   | 1.807   | 1.468   | 112.3     | 114.2     | 1.677   | 1.821   | 1.915   | 114.3     | 122.1     |
| Mes  | Me | 1.674   | 1.827   | 1.480   | 111.0     | 120.9     | 1.675   | 1.833   | 1.941   | 113.0     | 118.1     |
|      | Cl | 1.677   | 1.814   | 1.468   | 111.1     | 119.0     | 1.676   | 1.820   | 1.919   | 114.0     | 117.2     |
| Mes* | Me | 1.673   | 1.848   | 1.484   | 106.9     | 125.2     | 1.676   | 1.852   | 1.954   | 108.1     | 125.8     |
|      | Cl | 1.675   | 1.836   | 1.471   | 107.8     | 123.7     | 1.677   | 1.842   | 1.928   | 109.0     | 124.2     |

## PCPX-E(II) systems

**Table S2.** Selected geometrical features for the  $RP=C(Si(II)-Cl)-P(X)RR'$  ( $X = O$  or  $S$ ) model systems. The sum of covalent radii for relevant bonds:  $\Sigma_{Si-C}=1.87 \text{ \AA}$ ,  $\Sigma_{Si-O}=1.77 \text{ \AA}$ ,  $\Sigma_{Si-S}=2.16 \text{ \AA}$ ,  $\Sigma_{P=O}=1.59 \text{ \AA}$ ,  $\Sigma_{P=S}=1.96 \text{ \AA}$ .

| R                  | R' | P=C<br>(\AA) | C-P<br>(\AA) | P=X<br>(\AA) | X-Si(II) (\AA) | Si(II)-C (\AA) | C-P=X<br>( $^{\circ}$ ) | P=C-P<br>( $^{\circ}$ ) | X-Si(II)-C ( $^{\circ}$ ) | dev. pln.<br>( $^{\circ}$ ) |
|--------------------|----|--------------|--------------|--------------|----------------|----------------|-------------------------|-------------------------|---------------------------|-----------------------------|
| <b>PCPO-Si(II)</b> |    |              |              |              |                |                |                         |                         |                           |                             |
| H                  | Me | 1.656        | 1.743        | 1.544        | 1.900          | 2.009          | 97.0                    | 130.42                  | 78.29                     | 10.87                       |
|                    | Cl | 1.657        | 1.727        | 1.533        | 1.919          | 2.007          | 98.4                    | 130.6                   | 77.94                     | 13.81                       |
| Me                 | Me | 1.654        | 1.741        | 1.553        | 1.875          | 1.99           | 96.4                    | 130.3                   | 78.97                     | 6.81                        |
|                    | Cl | 1.655        | 1.732        | 1.534        | 1.914          | 1.993          | 97.5                    | 129.22                  | 78.0                      | 2.19                        |
| t-Bu               | Me | 1.659        | 1.754        | 1.557        | 1.867          | 1.997          | 96.3                    | 125.23                  | 79.39                     | 4.23                        |
|                    | Cl | 1.661        | 1.74         | 1.542        | 1.893          | 1.998          | 97.6                    | 125.45                  | 78.85                     | 1.9                         |
| Ph                 | Me | 1.661        | 1.744        | 1.552        | 1.877          | 1.985          | 96.7                    | 126.31                  | 79.33                     | 3.15                        |
|                    | Cl | 1.663        | 1.727        | 1.540        | 1.897          | 1.988          | 98.0                    | 127.43                  | 78.88                     | 5.58                        |
| Mes                | Me | 1.657        | 1.757        | 1.555        | 1.87           | 1.983          | 94.6                    | 134.11                  | 78.47                     | 6.4                         |
|                    | Cl | 1.658        | 1.74         | 1.542        | 1.893          | 1.987          | 96.0                    | 134.04                  | 77.98                     | 9.59                        |
| Mes*               | Me | 1.661        | 1.773        | 1.562        | 1.877          | 2.003          | 93.6                    | 133.69                  | 77.68                     | 18.73                       |
|                    | Cl | 1.661        | 1.751        | 1.541        | 1.912          | 2.003          | 95.2                    | 133.61                  | 76.91                     | 16.94                       |
| <b>PCPS-Si(II)</b> |    |              |              |              |                |                |                         |                         |                           |                             |
| H                  | Me | 1.658        | 1.751        | 1.996        | 2.451          | 1.972          | 99.2                    | 127.33                  | 79.71                     | 17.73                       |
|                    | Cl | 1.658        | 1.733        | 1.98         | 2.44           | 1.981          | 100.52                  | 128.81                  | 79.89                     | 20.65                       |
| Me                 | Me | 1.659        | 1.751        | 2.009        | 2.405          | 1.962          | 99.22                   | 125.88                  | 81.42                     | 10.88                       |
|                    | Cl | 1.659        | 1.732        | 1.993        | 2.398          | 1.97           | 100.23                  | 127.82                  | 81.29                     | 15.01                       |
| t-Bu               | Me | 1.666        | 1.768        | 2.015        | 2.39           | 1.967          | 99.58                   | 120                     | 82.63                     | 0.27                        |
|                    | Cl | 1.667        | 1.75         | 1.997        | 2.396          | 1.976          | 100.78                  | 121.08                  | 82.16                     | 4.17                        |
| Ph                 | Me | 1.665        | 1.754        | 2.006        | 2.412          | 1.961          | 99.92                   | 122.45                  | 81.6                      | 9.07                        |
|                    | Cl | 1.666        | 1.734        | 1.989        | 2.416          | 1.967          | 101.05                  | 124.94                  | 81.4                      | 13.01                       |
| Mes                | Me | 1.663        | 1.768        | 2.023        | 2.400          | 1.962          | 94.69                   | 124.32                  | 78.98                     | 14.98                       |
|                    | Cl | 1.663        | 1.748        | 2.005        | 2.398          | 1.968          | 96.0                    | 125.84                  | 78.93                     | 22.25                       |
| Mes*               | Me | 1.668        | 1.779        | 2.028        | 2.384          | 1.984          | 96.9                    | 128.6                   | 81.01                     | 17.65                       |
|                    | Cl | 1.669        | 1.757        | 1.998        | 2.405          | 1.982          | 98.43                   | 129.17                  | 80.31                     | 15.12                       |

**Table S3.** Selected geometrical features for the RP=C(Ge(II)-Cl)-P(X)RR' (X = O or S) model systems. The sum of covalent radii for relevant bonds:  $\Sigma_{\text{Ge-C}}=1.96 \text{ \AA}$ ,  $\Sigma_{\text{Ge-O}}=1.84 \text{ \AA}$ ,  $\Sigma_{\text{Ge-S}}=2.24 \text{ \AA}$ ,  $\Sigma_{\text{P=O}}=1.59 \text{ \AA}$  and  $\Sigma_{\text{P=S}}=1.96 \text{ \AA}$ .

| R                  | R' | P=C<br>(Å) | C-P<br>(Å) | P=X<br>(Å) | X-Si(II) (Å) | Si(II)-C (Å) | C-P=X<br>(°) | P=C-P<br>(°) | X-Si(II)-C (°) | dev. pln.<br>(°) |
|--------------------|----|------------|------------|------------|--------------|--------------|--------------|--------------|----------------|------------------|
| <b>PCPO-Ge(II)</b> |    |            |            |            |              |              |              |              |                |                  |
| H                  | Me | 1.654      | 1.748      | 1.533      | 2.079        | 2.107        | 99.86        | 129.58       | 73.87          | 13.32            |
|                    | Cl | 1.654      | 1.734      | 1.519      | 2.112        | 2.110        | 101.40       | 129.44       | 73.32          | 15.47            |
| Me                 | Me | 1.651      | 1.750      | 1.542      | 2.047        | 2.103        | 99.29        | 128.75       | 74.48          | 8.78             |
|                    | Cl | 1.652      | 1.734      | 1.527      | 2.074        | 2.104        | 100.64       | 129.19       | 73.97          | 11.35            |
| t-Bu               | Me | 1.653      | 1.761      | 1.544      | 2.045        | 2.117        | 97.39        | 125.30       | 74.65          | 3.17             |
|                    | Cl | 1.655      | 1.748      | 1.527      | 2.078        | 2.115        | 100.62       | 125.32       | 74.02          | 1.44             |
| Ph                 | Me | 1.656      | 1.749      | 1.539      | 2.057        | 2.097        | 99.71        | 127.10       | 74.56          | 5.09             |
|                    | Cl | 1.657      | 1.733      | 1.526      | 2.083        | 2.098        | 101.04       | 127.96       | 74.05          | 6.69             |
| Mes                | Me | 1.654      | 1.761      | 1.543      | 2.048        | 2.086        | 97.32        | 134.02       | 73.87          | 9.11             |
|                    | Cl | 1.658      | 1.733      | 1.526      | 2.085        | 2.097        | 101.04       | 127.96       | 74.05          | 6.70             |
| Mes*               | Me | 1.657      | 1.770      | 1.549      | 2.053        | 2.117        | 96.85        | 135.01       | 73.20          | 19.30            |
|                    | Cl | 1.659      | 1.751      | 1.529      | 2.095        | 2.121        | 98.51        | 134.09       | 73.39          | 18.26            |
| <b>PCPS-Ge(II)</b> |    |            |            |            |              |              |              |              |                |                  |
| H                  | Me | 1.657      | 1.752      | 1.997      | 2.549        | 2.080        | 100.92       | 126.63       | 76.70          | 20.14            |
|                    | Cl | 1.656      | 1.733      | 1.980      | 2.548        | 2.091        | 102.58       | 128.20       | 76.73          | 22.38            |
| Me                 | Me | 1.655      | 1.753      | 2.010      | 2.506        | 2.078        | 100.92       | 124.88       | 78.06          | 13.52            |
|                    | Cl | 1.656      | 1.734      | 1.992      | 2.506        | 2.087        | 102.19       | 126.85       | 77.85          | 16.77            |
| t-Bu               | Me | 1.656      | 1.770      | 2.014      | 2.500        | 2.092        | 101.65       | 119.93       | 78.99          | 1.41             |
|                    | Cl | 1.661      | 1.753      | 1.993      | 2.513        | 2.096        | 103.07       | 120.76       | 78.60          | 4.41             |
| Ph                 | Me | 1.660      | 1.753      | 2.005      | 2.526        | 2.076        | 101.68       | 123.39       | 78.04          | 11.10            |
|                    | Cl | 1.661      | 1.733      | 1.988      | 2.528        | 2.083        | 103.01       | 125.75       | 77.81          | 13.98            |
| Mes                | Me | 1.659      | 1.766      | 2.018      | 2.504        | 2.069        | 96.38        | 128.72       | 75.65          | 18.95            |
|                    | Cl | 1.659      | 1.744      | 1.998      | 2.505        | 2.079        | 98.28        | 130.97       | 75.78          | 20.55            |
| Mes*               | Me | 1.663      | 1.773      | 2.028      | 2.485        | 2.106        | 99.24        | 129.77       | 77.88          | 17.18            |
|                    | Cl | 1.664      | 1.752      | 1.997      | 2.511        | 2.101        | 100.88       | 130.02       | 77.19          | 15.54            |

**Table S4.** Selected geometrical features for the RP=C(Sn(II)-Cl)-P(X)RR' (X = O or S) model systems. The sum of covalent radii for relevant bonds  $\Sigma_{\text{Sn-C}}=2.15 \text{ \AA}$  and  $\Sigma_{\text{Sn-O}}=2.03 \text{ \AA}$ ,  $\Sigma_{\text{Sn-S}}=2.43 \text{ \AA}$ ,  $\Sigma_{\text{P-O}}=1.59 \text{ \AA}$  and  $\Sigma_{\text{P-S}}=1.96 \text{ \AA}$ .

| R                  | R' | P=C<br>(Å) | C-P<br>(Å) | P=X<br>(Å) | X-Si(II) (Å) | Si(II)-C (Å) | C-P=X<br>(°) | P=C-P<br>(°) | X-Si(II)-C (°) | dev. pln.<br>(°) |
|--------------------|----|------------|------------|------------|--------------|--------------|--------------|--------------|----------------|------------------|
| <b>PCPO-Sn(II)</b> |    |            |            |            |              |              |              |              |                |                  |
| H                  | Me | 1.654      | 1.752      | 1.529      | 2.261        | 2.307        | 102.67       | 127.08       | 68.32          | 14.54            |
|                    | Cl | 1.655      | 1.736      | 1.515      | 2.294        | 2.314        | 104.21       | 127.09       | 67.76          | 16.39            |
| Me                 | Me | 1.650      | 1.754      | 1.537      | 2.229        | 2.305        | 102.11       | 126.14       | 68.83          | 10.72            |
|                    | Cl | 1.651      | 1.738      | 1.522      | 2.256        | 2.309        | 103.46       | 126.72       | 68.32          | 13.02            |
| t-Bu               | Me | 1.652      | 1.763      | 1.540      | 2.229        | 2.316        | 102.22       | 124.60       | 68.98          | 2.03             |
|                    | Cl | 1.653      | 1.750      | 1.523      | 2.260        | 2.316        | 103.45       | 124.63       | 68.42          | 1.02             |
| Ph                 | Me | 1.654      | 1.751      | 1.534      | 2.249        | 2.295        | 102.55       | 126.96       | 68.76          | 6.11             |
|                    | Cl | 1.655      | 1.734      | 1.520      | 2.276        | 2.295        | 103.83       | 127.95       | 68.25          | 7.19             |
| Mes                | Me | 1.653      | 1.761      | 1.537      | 2.241        | 2.279        | 99.93        | 133.42       | 68.03          | 10.15            |
|                    | Cl | 1.654      | 1.743      | 1.522      | 2.273        | 2.283        | 101.59       | 133.61       | 67.57          | 11.42            |
| Mes*               | Me | 1.655      | 1.768      | 1.543      | 2.248        | 2.315        | 99.79        | 135.45       | 67.52          | 19.40            |
|                    | Cl | 1.657      | 1.749      | 1.522      | 2.291        | 2.316        | 101.45       | 134.41       | 66.79          | 19.17            |
| <b>PCPS-Sn(II)</b> |    |            |            |            |              |              |              |              |                |                  |
| H                  | Me | 1.657      | 1.754      | 2.009      | 2.714        | 2.284        | 104.03       | 124.06       | 72.13          | 17.78            |
|                    | Cl | 1.656      | 1.733      | 1.982      | 2.722        | 2.298        | 105.42       | 126.23       | 77.96          | 24.15            |
| Me                 | Me | 1.654      | 1.756      | 2.013      | 2.677        | 2.285        | 103.58       | 122.77       | 72.91          | 16.17            |
|                    | Cl | 1.655      | 1.735      | 1.995      | 2.680        | 2.297        | 104.96       | 124.91       | 72.58          | 19.06            |
| t-Bu               | Me | 1.658      | 1.771      | 2.017      | 2.672        | 2.298        | 104.48       | 118.98       | 73.81          | 3.35             |
|                    | Cl | 1.660      | 1.752      | 1.996      | 2.685        | 2.304        | 105.95       | 120.00       | 73.38          | 6.06             |
| Ph                 | Me | 1.658      | 1.753      | 2.007      | 2.705        | 2.277        | 104.38       | 123.37       | 72.77          | 12.30            |
|                    | Cl | 1.656      | 1.733      | 1.990      | 2.711        | 2.286        | 105.81       | 125.87       | 72.46          | 14.67            |
| Mes                | Me | 1.659      | 1.764      | 2.019      | 2.684        | 2.268        | 98.89        | 128.01       | 70.52          | 20.23            |
|                    | Cl | 1.658      | 1.741      | 1.999      | 2.690        | 2.280        | 100.93       | 130.53       | 70.55          | 21.61            |
| Mes*               | Me | 1.661      | 1.769      | 2.032      | 2.663        | 2.309        | 102.18       | 130.22       | 72.75          | 17.39            |
|                    | Cl | 1.663      | 1.751      | 2.000      | 2.690        | 2.308        | 103.67       | 129.93       | 71.98          | 16.97            |

**Table S5.** Selected geometrical features for the RP=C(Pb(II)-Cl)-P(X)RR' (X = O or S) model systems. The sum of covalent radii for relevant bonds  $\Sigma_{\text{Pb-C}}=2.19 \text{ \AA}$ ,  $\Sigma_{\text{Pb-O}}=2.07 \text{ \AA}$ ,  $\Sigma_{\text{Pb-S}}=2.47 \text{ \AA}$ ,  $\Sigma_{\text{P=O}}=1.59 \text{ \AA}$  and  $\Sigma_{\text{P=S}}=1.96 \text{ \AA}$ .

| R                  | R' | P=C<br>( $\text{\AA}$ ) | C-P<br>( $\text{\AA}$ ) | P=X<br>( $\text{\AA}$ ) | X-Si(II) ( $\text{\AA}$ ) | Si(II)-C ( $\text{\AA}$ ) | C-P=X<br>( $^\circ$ ) | P=C-P<br>( $^\circ$ ) | X-Si(II)-C ( $^\circ$ ) | dev. pln.<br>( $^\circ$ ) |
|--------------------|----|-------------------------|-------------------------|-------------------------|---------------------------|---------------------------|-----------------------|-----------------------|-------------------------|---------------------------|
| <b>PCPO-Pb(II)</b> |    |                         |                         |                         |                           |                           |                       |                       |                         |                           |
| H                  | Me | 1.654                   | 1.754                   | 1.523                   | 2.390                     | 2.404                     | 104.58                | 126.22                | 65.61                   | 15.88                     |
|                    | Cl | 1.654                   | 1.737                   | 1.510                   | 2.424                     | 2.412                     | 106.19                | 126.33                | 65.03                   | 17.59                     |
| Me                 | Me | 1.649                   | 1.757                   | 1.532                   | 2.355                     | 2.403                     | 103.97                | 125.39                | 66.08                   | 13.03                     |
|                    | Cl | 1.650                   | 1.740                   | 1.517                   | 2.382                     | 2.409                     | 105.39                | 126.08                | 65.55                   | 15.18                     |
| t-Bu               | Me | 1.650                   | 1.764                   | 1.533                   | 2.361                     | 2.409                     | 104.16                | 124.85                | 66.20                   | 0.16                      |
|                    | Cl | 1.651                   | 1.750                   | 1.517                   | 2.389                     | 2.409                     | 105.40                | 124.97                | 65.69                   | 0.73                      |
| Ph                 | Me | 1.652                   | 1.751                   | 1.528                   | 2.385                     | 2.390                     | 104.41                | 127.65                | 65.83                   | 7.79                      |
|                    | Cl | 1.653                   | 1.734                   | 1.514                   | 2.412                     | 2.390                     | 105.68                | 128.72                | 65.32                   | 8.57                      |
| Mes                | Me | 1.651                   | 1.759                   | 1.530                   | 2.379                     | 2.371                     | 101.64                | 134.30                | 65.05                   | 11.53                     |
|                    | Cl | 1.652                   | 1.741                   | 1.514                   | 2.414                     | 2.374                     | 103.39                | 134.57                | 64.58                   | 12.45                     |
| Mes*               | Me | 1.652                   | 1.766                   | 1.535                   | 2.391                     | 2.406                     | 101.87                | 137.12                | 64.71                   | 14.23                     |
|                    | Cl | 1.653                   | 1.745                   | 1.514                   | 2.442                     | 2.405                     | 103.69                | 136.16                | 63.94                   | 18.97                     |
| <b>PCPS-Pb(II)</b> |    |                         |                         |                         |                           |                           |                       |                       |                         |                           |
| H                  | Me | 1.657                   | 1.753                   | 2.000                   | 2.805                     | 2.386                     | 105.06                | 123.68                | 69.60                   | 24.37                     |
|                    | Cl | 1.656                   | 1.731                   | 1.982                   | 2.811                     | 2.404                     | 107.05                | 125.82                | 69.45                   | 25.88                     |
| Me                 | Me | 1.653                   | 1.755                   | 2.012                   | 2.767                     | 2.391                     | 104.99                | 122.39                | 70.52                   | 18.49                     |
|                    | Cl | 1.653                   | 1.733                   | 1.995                   | 2.770                     | 2.405                     | 106.48                | 124.88                | 70.19                   | 21.17                     |
| t-Bu               | Me | 1.656                   | 1.765                   | 2.019                   | 2.753                     | 2.404                     | 105.79                | 120.09                | 71.38                   | 5.95                      |
|                    | Cl | 1.657                   | 1.744                   | 1.999                   | 2.763                     | 2.413                     | 107.26                | 121.46                | 70.94                   | 8.75                      |
| Ph                 | Me | 1.656                   | 1.762                   | 2.011                   | 2.771                     | 2.387                     | 105.61                | 121.88                | 70.95                   | 2.95                      |
|                    | Cl | 1.655                   | 1.740                   | 1.987                   | 2.809                     | 2.404                     | 106.79                | 124.16                | 69.66                   | 19.48                     |
| Mes                | Me | 1.655                   | 1.769                   | 2.019                   | 2.791                     | 2.388                     | 105.12                | 124.77                | 70.62                   | 11.46                     |
|                    | Cl | 1.657                   | 1.752                   | 1.988                   | 2.822                     | 2.385                     | 106.61                | 125.64                | 69.84                   | 13.42                     |
| Mes*               | Me | 1.658                   | 1.765                   | 2.031                   | 2.757                     | 2.409                     | 103.86                | 131.45                | 70.44                   | 16.26                     |
|                    | Cl | 1.660                   | 1.747                   | 1.998                   | 2.786                     | 2.406                     | 105.40                | 131.19                | 69.69                   | 16.68                     |

**Table S6.** Calculated *relaxed* BDE (kcal mol<sup>-1</sup>) values for the O-E(II) and S-E(II) bonds of model PCPO-E(II) and PCPS-E(II) systems.

| R            | R' | PCPO-E(II) |        |        |        | PCPS-E(II) |        |        |        |
|--------------|----|------------|--------|--------|--------|------------|--------|--------|--------|
|              |    | Si(II)     | Ge(II) | Sn(II) | Pb(II) | Si(II)     | Ge(II) | Sn(II) | Pb(II) |
| H            | Me | -9.4       | -9.7   | -12.6  | -13.0  | -8.7       | -11.1  | -13.8  | -14.1  |
| Me           | Me | -20.5      | -18.2  | -21.0  | -19.9  | -19.1      | -19.9  | -22.5  | -22.5  |
| <i>t</i> -Bu | Me | -21.0      | -18.6  | -21.6  | -20.4  | -19.0      | -19.6  | -22.5  | -22.3  |
| Ph           |    | -15.5      | -12.3  | -12.7  | -10.7  | -13.6      | -13.4  | -13.6  | -9.6   |
| Mes          | Me | -15.1      | -12.4  | -12.3  | -10.1  | -12.3      | -11.2  | -10.8  | -9.7   |
| Mes*         | Me | -15.7      | -12.0  | -12.6  | -10.9  | -16.0      | -19.4  | -19.8  | -19.0  |

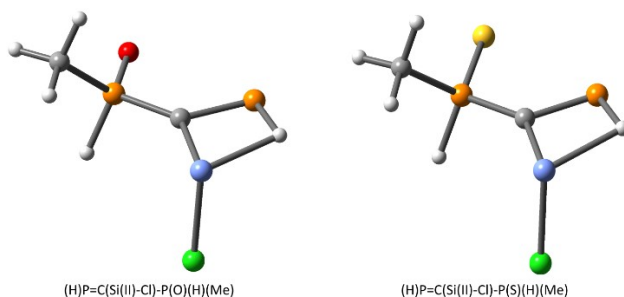

**Figure S1.** Equilibrium geometry of the (H)P=C(E(II)-Cl)-P(X)(H)(Me) model systems employed in the *relaxed* BDE approximation. The structures were obtained from the initial chelate geometry through rotation with 180° around the  $\sigma$ (P-C) bond. Following the geometry optimization the H atom bound to the P(sp<sup>2</sup>) atom migrates into a bridging coordination mode between the P(sp<sup>2</sup>) and the E atoms.

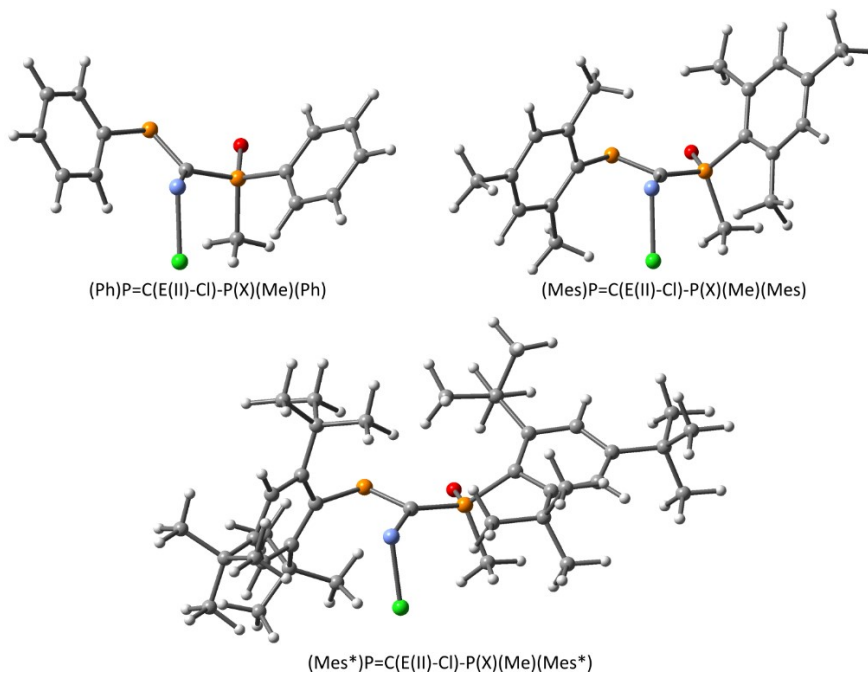

**Figure S2.** Equilibrium geometry of (Ph)P=C(E(II)-Cl)-P(X)(Ph)(Me), (Mes)P=C(E(II)-Cl)-P(X)(Ph)(Mes) and (Mes\*)P=C(E(II)-Cl)-P(X)(Ph)(Mes\*) model systems employed in the *relaxed* BDE approximation. The structures were obtained from the initial chelate geometry through rotation with 180° around the  $\sigma$ (P-C) bond.

**Table S7.** Atomic orbital (AO) composition of the  $\sigma(\text{E-X})$ ,  $\sigma(\text{E-C})$  and  $\sigma(\text{E-Cl})$  sigma bonds, in the particular cases of  $(\text{Me})\text{P}=\text{C}(\text{E}(\text{II})-\text{Cl})-\text{P}(\text{X})(\text{Me})(\text{Me})$  and  $(\text{Mes}^*)\text{P}=\text{C}(\text{E}(\text{II})-\text{Cl})-\text{P}(\text{X})(\text{Mes}^*)(\text{Me})$  model systems.

| E(II)             | R    | (%) E(II) in $\sigma(\text{X-E})$ bond | % p of E(II) in $\sigma(\text{X-E})$ bond | (%) E(II) in $\sigma(\text{C-E})$ bond | % p of E(II) in $\sigma(\text{C-E})$ bond | (%) E(II) in $\sigma(\text{Cl-E})$ bond | % p of E(II) in $\sigma(\text{Cl-E})$ bond |
|-------------------|------|----------------------------------------|-------------------------------------------|----------------------------------------|-------------------------------------------|-----------------------------------------|--------------------------------------------|
| <b>PCPO-E(II)</b> |      |                                        |                                           |                                        |                                           |                                         |                                            |
| Si(II)            | Me   | 11.12                                  | 90.22                                     | 20.01                                  | 88.13                                     | 19.97                                   | 89.97                                      |
|                   | Mes* | -                                      | -                                         | 19.96                                  | 85.93                                     | 20.01                                   | 88.54                                      |
| Ge(II)            | Me   | 8.83                                   | 94.06                                     | 18.53                                  | 92.30                                     | 17.67                                   | 94.03                                      |
|                   | Mes* | -                                      | -                                         | 18.84                                  | 89.42                                     | -                                       | -                                          |
| Sn(II)            | Me   | 7.56                                   | 95.29                                     | 16.82                                  | 93.49                                     | 16.19                                   | 94.58                                      |
|                   | Mes* | -                                      | -                                         | 16.28                                  | 91.23                                     | -                                       | -                                          |
| Pb(II)            | Me   | 6.70                                   | 96.72                                     | 16.43                                  | 95.63                                     | 15.23                                   | 96.55                                      |
|                   | Mes* | -                                      | -                                         | 14.92                                  | 94.19                                     | -                                       | -                                          |
| <b>PCPS-E(II)</b> |      |                                        |                                           |                                        |                                           |                                         |                                            |
| Si(II)            | Me   | 19.84                                  | 93.59                                     | 20.73                                  | 87.49                                     | 20.07                                   | 90.33                                      |
|                   | Mes* | 20.02                                  | 93.92                                     | 20.17                                  | 87.17                                     | 19.95                                   | 89.97                                      |
| Ge(II)            | Me   | 18.07                                  | 96.21                                     | 19.29                                  | 91.68                                     | 18.24                                   | 94.12                                      |
|                   | Mes* | 18.46                                  | 96.39                                     | 19.03                                  | 91.42                                     | 18.52                                   | 93.78                                      |
| Sn(II)            | Me   | 15.88                                  | 96.60                                     | 17.43                                  | 93.18                                     | 16.57                                   | 94.71                                      |
|                   | Mes* | 15.41                                  | 96.58                                     | 16.35                                  | 92.14                                     | -                                       | -                                          |
| Pb(II)            | Me   | 14.58                                  | 97.92                                     | 16.75                                  | 95.53                                     | 15.55                                   | 96.65                                      |
|                   | Mes* | -                                      | -                                         | 15.10                                  | 94.47                                     | -                                       | -                                          |

**Table S8.** Calculated interaction-energies ( $\text{kcal mol}^{-1}$ ) of  $\text{LP}(\text{P}) \rightarrow \sigma^*(\text{E-R})$ ,  $\text{LP}(\text{X}) \rightarrow p(\text{E})$  or  $\pi(\text{C}=\text{P}) \rightarrow \sigma^*(\text{E-Cl})$  donations, as well as the total electron-donation energy, for several model PCPX-E(II) systems.

| E(II)             | R    | $\text{LP}(\text{P}) \rightarrow \sigma^*(\text{E-R})$ | $\text{LP}(\text{X}) \rightarrow \sigma^*(\text{E-Cl})$ | $\text{LP}(\text{X}) \rightarrow \text{LV}(\text{E})$ | $\pi(\text{C}=\text{P}) \rightarrow \sigma^*(\text{E-Cl})$ | Total donation |
|-------------------|------|--------------------------------------------------------|---------------------------------------------------------|-------------------------------------------------------|------------------------------------------------------------|----------------|
| <b>PCPO-E(II)</b> |      |                                                        |                                                         |                                                       |                                                            |                |
| Si(II)            | Me   | 7.07                                                   | 5                                                       |                                                       | 1.74                                                       | 13.81          |
|                   | Mes* | 6.64                                                   | 5.08                                                    | 11.07                                                 | 1.54                                                       | 24.33          |
| Ge(II)            | Me   | 6.79                                                   | 3.43                                                    |                                                       | 1.56                                                       | 11.78          |
|                   | Mes* | 6.9                                                    | 6.33                                                    | 9.4                                                   | 2.94                                                       | 25.57          |
| Sn(II)            | Me   | 6.52                                                   | 2.34                                                    |                                                       | 0.75                                                       | 9.61           |
|                   | Mes* | 7.32                                                   | 4.11                                                    | 8.27                                                  | 1.56                                                       | 21.26          |
| Pb(II)            | Me   | 6.73                                                   | 1.79                                                    |                                                       | 0.57                                                       | 9.09           |
|                   | Mes* | 7.39                                                   | 2.8                                                     | 7.63                                                  | 1.22                                                       | 19.04          |
| <b>PCPS-E(II)</b> |      |                                                        |                                                         |                                                       |                                                            |                |
| Si(II)            | Me   | 7.21                                                   | 4.79                                                    |                                                       | 2.13                                                       | 14.13          |
|                   | Mes* | 7.94                                                   | 4.23                                                    |                                                       | 1.74                                                       | 13.91          |
| Ge(II)            | Me   | 6.76                                                   | 4.52                                                    |                                                       | 1.84                                                       | 13.12          |
|                   | Mes* | 6.92                                                   | 4.22                                                    |                                                       | 1.5                                                        | 12.64          |
| Sn(II)            | Me   | 6.59                                                   | 3.23                                                    |                                                       | 0.83                                                       | 10.65          |
|                   | Mes* | 7.39                                                   | 5.01                                                    | 3.52                                                  | 1.69                                                       | 17.61          |
| Pb(II)            | Me   | 6.68                                                   | 2.84                                                    |                                                       | 0.59                                                       | 10.11          |
|                   | Mes* | 7.33                                                   | 3.98                                                    | 4.18                                                  | 1.26                                                       | 16.75          |



## PCPX-E(II)-AuCl systems

**Table S9.** The most relevant geometrical data computed for the {RP=C(Si(II)-Cl)-P(X)(Me)R}AuCl model complexes obtained via Si→Au bonds.

| X | R            | P=X (Å) | X-Si (Å) | Si-C (Å) | Au-Si (Å) | dev. pln. (°) |
|---|--------------|---------|----------|----------|-----------|---------------|
| O | H            | 1.556   | 1.814    | 1.947    | 2.236     | 3.29          |
|   | Me           | 1.567   | 1.794    | 1.932    | 2.242     | 3.66          |
|   | <i>t</i> -Bu | 1.572   | 1.787    | 1.939    | 2.247     | 3.48          |
|   | Ph           | 1.568   | 1.787    | 1.932    | 2.246     | 2.53          |
|   | Mes          | 1.570   | 1.786    | 1.925    | 2.246     | 0.57          |
|   | Mes*         | 1.581   | 1.782    | 1.926    | 2.256     | 14.37         |
| S | H            | 2.012   | 2.328    | 1.919    | 2.240     | 13.72         |
|   | Me           | 2.026   | 2.296    | 1.911    | 2.248     | 9.46          |
|   | <i>t</i> -Bu | 2.032   | 2.285    | 1.920    | 2.253     | 2.04          |
|   | Ph           | 2.030   | 2.282    | 1.911    | 2.253     | 4.80          |
|   | Mes          | 2.038   | 2.277    | 1.908    | 2.251     | 14.88         |
|   | Mes*         | 2.049   | 2.267    | 1.918    | 2.260     | 14.31         |

**Table S10.** The most relevant geometrical data computed for the {RP=C(Ge(II)-Cl)-P(X)(Me)R}AuCl model complexes obtained via Ge→Au bonds.

| X | R            | P=X (Å) | X-Ge (Å) | Ge-C (Å) | Au-Ge (Å) | dev. pln. (°) |
|---|--------------|---------|----------|----------|-----------|---------------|
| O | H            | 1.542   | 1.992    | 2.030    | 2.327     | 6.36          |
|   | Me           | 1.553   | 1.966    | 2.021    | 2.331     | 5.83          |
|   | <i>t</i> -Bu | 1.556   | 1.958    | 2.030    | 2.336     | 3.27          |
|   | Ph           | 1.552   | 1.967    | 2.017    | 2.332     | 2.79          |
|   | Mes          | 1.555   | 1.960    | 2.010    | 2.335     | 6.88          |
|   | Mes*         | 1.564   | 1.958    | 2.024    | 2.340     | 16.76         |
| S | H            | 2.008   | 2.439    | 2.011    | 2.332     | 16.20         |
|   | Me           | 2.023   | 2.401    | 2.006    | 2.338     | 12.27         |
|   | <i>t</i> -Bu | 2.389   | 2.388    | 2.013    | 2.342     | 2.87          |
|   | Ph           | 2.021   | 2.408    | 2.004    | 2.339     | 9.69          |
|   | Mes          | 2.041   | 2.386    | 1.996    | 2.341     | 15.40         |
|   | Mes*         | 2.027   | 2.375    | 2.021    | 2.346     | 15.34         |

**Table S11.** The most relevant geometrical data computed for the {RP=C(Sn(II)-Cl)-P(X)(Me)R}AuCl model complexes obtained via Sn→Au bonds.

| X | R            | P=X (Å) | X-Sn (Å) | Sn-C (Å) | Au-Sn (Å) | dev. pln. (°) |
|---|--------------|---------|----------|----------|-----------|---------------|
| O | H            | 1.534   | 2.191    | 2.227    | 2.502     | 7.93          |
|   | Me           | 1.543   | 2.165    | 2.216    | 2.504     | 7.84          |
|   | <i>t</i> -Bu | 1.547   | 2.161    | 2.221    | 2.507     | 2.19          |
|   | Ph           | 1.542   | 2.176    | 2.207    | 2.506     | 4.46          |
|   | Mes          | 1.545   | 2.174    | 2.194    | 2.508     | 8.47          |
|   | Mes*         | 1.552   | 2.173    | 2.209    | 2.512     | 17.13         |
| S | H            | 2.008   | 2.622    | 2.210    | 2.506     | 18.12         |
|   | Me           | 2.023   | 2.584    | 2.584    | 2.509     | 14.98         |
|   | <i>t</i> -Bu | 2.028   | 2.574    | 2.212    | 2.513     | 3.85          |
|   | Ph           | 2.019   | 2.602    | 2.197    | 2.511     | 11.34         |
|   | Mes          | 2.040   | 2.581    | 2.186    | 2.514     | 16.31         |
|   | Mes*         | 2.046   | 2.565    | 2.211    | 2.517     | 15.92         |

**Table S12.** The most relevant geometrical data computed for the {RP=C(Pb(II)-Cl)-P(X)(Me)R}AuCl model complexes obtained via Pb→Au bonds.

| X | R            | P=X (Å) | X-Pb (Å) | Pb-C (Å) | Au-Pb (Å) | dev. pln. (°) |
|---|--------------|---------|----------|----------|-----------|---------------|
| O | H            | 1.523   | 2.354    | 2.306    | 2.591     | 10.73         |
|   | Me           | 1.531   | 2.321    | 2.298    | 2.591     | 9.94          |
|   | <i>t</i> -Bu | 1.534   | 2.319    | 2.302    | 2.594     | 0.80          |
|   | Ph           | 1.528   | 2.346    | 2.285    | 2.593     | 6.34          |
|   | Mes          | 1.529   | 2.354    | 2.267    | 2.593     | 7.00          |
|   | Mes*         | 1.535   | 2.352    | 2.287    | 2.598     | 16.92         |
| S | H            | 2.000   | 2.743    | 2.297    | 2.595     | 21.04         |
|   | Me           | 2.015   | 2.702    | 2.294    | 2.596     | 16.91         |
|   | <i>t</i> -Bu | 2.020   | 2.692    | 2.302    | 2.600     | 4.52          |
|   | Ph           | 2.009   | 2.732    | 2.282    | 2.597     | 13.26         |
|   | Mes          | 2.021   | 2.724    | 2.269    | 2.600     | 18.54         |
|   | Mes*         | 2.036   | 2.688    | 2.296    | 2.603     | 15.59         |

**Table S13.** Computed relative enthalpies (kcal mol<sup>-1</sup>) of PCPO-Ge(II)-AuCl and PCPS-Ge(II)-AuCl coordination isomers obtained through Ge(II)→Au, X→Au (X = O or S), P(sp<sup>2</sup>)→Au and π(C=P)→Au donations. The relative enthalpies are calculated with respect to the coordination isomer displaying Ge(II)→Au bonds.

| R    | R' | PCPO-Ge(II)-AuCl |      |      |           | PCPS-Ge(II)-AuCl |      |      |           |
|------|----|------------------|------|------|-----------|------------------|------|------|-----------|
|      |    | Ge(II)→Au        | O→Au | P→Au | π(C=P)→Au | Ge(II)→Au        | S→Au | P→Au | π(C=P)→Au |
| H    | Me | 0.0              | 27.4 | 0.5  | 2.6       | 0.0              | 14.4 | 0.6  | 2.6       |
|      | Cl | 0.0              | 27.5 | -0.5 | 0.9       | 0.0              | 13.8 | -0.4 | 0.4       |
| Me   | Me | 0.0              | 28.1 | -1.7 | 4.1       | 0.0              | 15.8 | -1.4 | 4.5       |
|      | Cl | 0.0              | 28.2 | -2.5 | 2.9       | 0.0              | 15.0 | -2.1 | 2.7       |
| t-Bu | Me | 0.0              | 29.3 | -1.1 | 6.1       | 0.0              | 19.0 | -0.8 | 6.8       |
|      | Cl | 0.0              | 29.5 | -2.1 | 4.8       | 0.0              | 18.3 | -1.6 | 5.4       |
| Ph   | Me | 0.0              | 28.5 | -2.1 | 6.4       | 0.0              | 16.4 | -1.8 | 6.4       |
|      | Cl | 0.0              | 28.5 | -2.8 | 5.4       | 0.0              | 16.5 | -2.4 | 4.8       |
| Mes  | Me | 0.0              | 30.4 | 1.0  | 10.7      | 0.0              | 21.4 | 1.0  | 12.6      |
|      | Cl | 0.0              | 31.0 | 0.1  | 9.8       | 0.0              | 21.5 | 0.1  | 10.6      |
| Mes* | Me | 0.0              | 29.9 | 6.7  | 23.7      | 0.0              | 14.5 | 5.9  | 26.0      |
|      | Cl | 0.0              | 29.0 | 3.9  | 23.4      | 0.0              | 14.5 | 3.7  | 25.4      |

**Table S14.** Computed relative enthalpies (kcal mol<sup>-1</sup>) of PCPO-Sn(II)-AuCl and PCPS-Sn(II)-AuCl coordination isomers obtained through Sn(II)→Au, X→Au (X = O or S), P(sp<sup>2</sup>)→Au and π(C=P)→Au donations. The relative enthalpies are calculated with respect to the coordination isomer displaying Sn(II)→Au bonds.

| R    | R' | PCPO-Sn(II)-AuCl |      |       |           | PCPS-Sn(II)-AuCl |      |       |           |
|------|----|------------------|------|-------|-----------|------------------|------|-------|-----------|
|      |    | Sn(II)→Au        | O→Au | P→Au  | π(C=P)→Au | Sn(II)→Au        | S→Au | P→Au  | π(C=P)→Au |
| H    | Me | 0.0              | 16.2 | -10.4 | -8.2      | 0.0              | 4.4  | -9.7  | -7.5      |
|      | Cl | 0.0              | 16.7 | -11.1 | -9.6      | 0.0              | 4.2  | -10.3 | -9.5      |
| Me   | Me | 0.0              | 16.4 | -12.7 | -7.0      | 0.0              | 5.6  | -11.6 | -5.8      |
|      | Cl | 0.0              | 17.0 | -13.3 | -8.0      | 0.0              | 5.1  | -12.1 | -7.4      |
| t-Bu | Me | 0.0              | 17.8 | -11.8 | -4.9      | 0.0              | 9.5  | -10.9 | -3.4      |
|      | Cl | 0.0              | 18.5 | -12.5 | -6.0      | 0.0              | 8.9  | -11.6 | -4.9      |
| Ph   | Me | 0.0              | 16.8 | -12.7 | -5.1      | 0.0              | 6.9  | -11.5 | -4.2      |
|      | Cl | 0.0              | 17.2 | -13.3 | -5.9      | 0.0              | 6.5  | -12.0 | -5.6      |
| Mes  | Me | 0.0              | 18.6 | -9.5  | -0.7      | 0.0              | 10.3 | -7.4  | 1.9       |
|      | Cl | 0.0              | 19.5 | -10.4 | -1.5      | 0.0              | 9.4  | -9.8  | -1.0      |
| Mes* | Me | 0.0              | 18.2 | -4.2  | 12.4      | 0.0              | 4.4  | -4.2  | 15.5      |
|      | Cl | 0.0              | 18.4 | -6.1  | 13.3      | 0.0              | 5.1  | -5.9  | 15.4      |

**Table S15.** Computed relative enthalpies (kcal mol<sup>-1</sup>) of PCPO-Pb(II)-AuCl and PCPS-Pb(II)-AuCl coordination isomers obtained through Pb(II)→Au, X→Au (X = O or S), P(sp<sup>2</sup>)→Au and π(C=P)→Au donations. The relative enthalpies are calculated with respect to the coordination isomer displaying Pb(II)→Au bonds.

| R    | R' | PCPO-Pb(II)-AuCl |      |       |           | PCPS-Pb(II)-AuCl |       |       |           |
|------|----|------------------|------|-------|-----------|------------------|-------|-------|-----------|
|      |    | Pb(II)→Au        | O→Au | P→Au  | π(C=P)→Au | Pb(II)→Au        | S→Au  | P→Au  | π(C=P)→Au |
| H    | Me | 0.0              | -1.2 | -26.8 | -24.9     | 0.0              | -12.1 | -25.8 | -24.0     |
|      | Cl | 0.0              | -0.2 | -27.1 | -26.0     | 0.0              | -12.0 | -26.2 | -25.8     |
| Me   | Me | 0.0              | -1.3 | -29.2 | -24.0     | 0.0              | -11.4 | -27.9 | -22.8     |
|      | Cl | 0.0              | -0.3 | -29.5 | -24.8     | 0.0              | -11.6 | -28.2 | -24.3     |
| t-Bu | Me | 0.0              | -0.6 | -28.7 | -22.3     | 0.0              | -7.9  | -27.8 | -20.8     |
|      | Cl | 0.0              | 0.7  | -28.9 | -22.9     | 0.0              | -8.8  | -28.3 | -22.2     |
| Ph   | Me | 0.0              | -1.0 | -28.9 | -22.3     | 0.0              | -10.2 | -27.7 | -21.3     |
|      | Cl | 0.0              | -0.2 | -29.3 | -22.9     | 0.0              | -10.3 | -28.1 | -22.6     |
| Mes  | Me | 0.0              | 0.6  | -26.1 | -17.8     | 0.0              | -8.7  | -25.7 | -16.6     |
|      | Cl | 0.0              | 1.7  | -26.7 | -18.5     | 0.0              | -8.2  | -26.2 | -18.2     |
| Mes* | Me | 0.0              | -0.2 | -21.0 | -5.0      | 0.0              | -13.2 | -21.2 | -2.3      |
|      | Cl | 0.0              | 0.7  | -22.7 | -3.5      | 0.0              | -12.1 | -22.8 | -2.2      |

**Table S16.** Relative energies (kcal mol<sup>-1</sup>) of the PCPX-E(II)-AuCl complexes formed through the E(II)→Au donations, in which the X→E(II) donations are absent (i.e., geometries are obtained from the equilibrium chelate structures by rotating the σ(P-C) bond of the PCPX-E(II) ligand with 180°). The relative energies are calculated with respect to the complexes involving the chelate PCPX-E(II) ligands.

| X    | R    | E    |      |      |      |
|------|------|------|------|------|------|
|      |      | Si   | Ge   | Sn   | Pb   |
| O    | H    | 20.3 | 13.7 | 15.9 | 12.2 |
|      | Me   | 30.7 | 23.6 | 23.7 | 19.0 |
|      | t-Bu | 31.5 | 23.8 | 24.4 | 19.7 |
|      | Ph   | 25.2 | 16.7 | 14.8 | 10.3 |
|      | Mes  | 24.8 | 17.3 | 14.4 | 9.3  |
|      | Mes* | 26.1 | 17.6 | 15.3 | 11.6 |
|      | S    | H    | 19.3 | 14.8 | 17.3 |
| Me   |      | 26.5 | 24.4 | 26.7 | 22.3 |
| t-Bu |      | 27.1 | 24.8 | 26.1 | 22.2 |
| Ph   |      | 20.0 | 17.3 | 16.0 | 12.6 |
| Mes  |      | 17.8 | 17.5 | 15.2 | 9.7  |
| Mes* |      | 23.1 | 20.4 | 19.0 | 19.0 |

**Table S17.** Total back-donation  $d(\text{Au}) \rightarrow \sigma^*(\text{E}-\text{Y})$  energy ( $\text{kcal mol}^{-1}$ ) arising from  $d(\text{Au}) \rightarrow \sigma^*(\text{E}-\text{C})$ ,  $d(\text{Au}) \rightarrow \sigma^*(\text{E}-\text{Cl})$  and  $d(\text{Au}) \rightarrow \sigma^*(\text{E}-\text{X})$  interactions, for several  $\{\text{RP}=\text{C}(\text{E}(\text{II})-\text{Cl})-\text{P}(\text{X})(\text{Me})\text{R}\}\text{AuCl}$  model complexes that involve the  $\text{E}(\text{II}) \rightarrow \text{Au}$  dative bond.

| E  | R'   | PCPO-E(II)-AuCl                                                                    |                                                                                    |
|----|------|------------------------------------------------------------------------------------|------------------------------------------------------------------------------------|
|    |      | $d(\text{Au}) \rightarrow \sigma^*(\text{E}-\text{Y})$ (Y = C, Cl or O) (kcal/mol) | $d(\text{Au}) \rightarrow \sigma^*(\text{E}-\text{Y})$ (Y = C, Cl or S) (kcal/mol) |
| Si | Me   | 21.0                                                                               | 15.5                                                                               |
|    | Mes* | 18.0                                                                               | 12.9                                                                               |
| Ge | Me   | 16.5                                                                               | 12.8                                                                               |
|    | Mes* | 15.0                                                                               | 11.2                                                                               |
| Sn | Me   | 12.8                                                                               | 10.5                                                                               |
|    | Mes* | 10.9                                                                               | 8.9                                                                                |
| Pb | Me   | 9.4                                                                                | 7.8                                                                                |
|    | Mes* | 9.2                                                                                | 7.9                                                                                |

**Table S18.** Calculated EDA parameters ( $\text{kcal mol}^{-1}$ ) for several model  $\{\text{RP}=\text{C}(\text{Si}(\text{II})-\text{Cl})-\text{P}(\text{X})(\text{Me})\text{R}\}\text{AuCl}$  model complexes (R = Me or Mes\*; X = O or S).

| R                       | coord.mode                                     | Total int. energy | Electrostatic Int. | Exchange-Rep. | Exchange Int. | Repulsion | Orbital Relaxation |
|-------------------------|------------------------------------------------|-------------------|--------------------|---------------|---------------|-----------|--------------------|
| <b>PCPO-Si(II)-AuCl</b> |                                                |                   |                    |               |               |           |                    |
| Me                      | Si(II)→Au                                      | -81.0             | -84.1              | 143.8         | -85.3         | 229.0     | -123.1             |
|                         | O→Au                                           | -29.7             | -41.2              | 59.8          | -31.3         | 91.1      | -37.7              |
|                         | P→Au                                           | -62.2             | -74.9              | 138.1         | -77.4         | 215.5     | -106.8             |
|                         | $\pi(\text{C}=\text{P}) \rightarrow \text{Au}$ | -57.8             | -75.7              | 154.3         | -82.4         | 236.7     | -110.3             |
| Mes*                    | Si(II)→Au                                      | -88.4             | -93.1              | 154.4         | -91.6         | 245.9     | -129.2             |
|                         | O→Au                                           | -32.9             | -45.0              | 65.7          | -34.8         | 100.5     | -39.7              |
|                         | P→Au                                           | -60.9             | -76.8              | 144.2         | -80.8         | 225.0     | -105.0             |
|                         | $\pi(\text{C}=\text{P}) \rightarrow \text{Au}$ | -57.9             | -102.4             | 201.4         | -109.7        | 311.2     | -119.8             |
| <b>PCPS-Si(II)-AuCl</b> |                                                |                   |                    |               |               |           |                    |
| Me                      | Si(II)→Au                                      | -77.7             | -79.5              | 139.3         | -82.5         | 221.9     | -119.8             |
|                         | S→Au                                           | -43.2             | -51.5              | 96.8          | -53.4         | 150.3     | -71.8              |
|                         | P→Au                                           | -61.5             | -74.2              | 138.5         | -77.5         | 215.9     | -106.8             |
|                         | $\pi(\text{C}=\text{P}) \rightarrow \text{Au}$ | -57.0             | -75.2              | 155.0         | -82.6         | 237.6     | -110.0             |
| Mes*                    | Si(II)→Au                                      | -84.7             | -87.1              | 147.7         | -87.6         | 235.4     | -124.6             |
|                         | S→Au                                           | -49.0             | -57.5              | 101.9         | -56.6         | 158.5     | -75.8              |
|                         | P→Au                                           | -60.8             | -76.6              | 144.2         | -81.0         | 225.1     | -104.8             |
|                         | $\pi(\text{C}=\text{P}) \rightarrow \text{Au}$ | -54.5             | -93.6              | 189.5         | -102.4        | 291.8     | -113.6             |

**Table S19.** Calculated EDA parameters (kcal mol<sup>-1</sup>) for several model {RP=C(Ge(II)-Cl)-P(X)(Me)R}AuCl model complexes (R = Me or Mes\*; X = O or S).

| R                       | coord.mode | Total int. energy | Electrostatic Int. | Exchange-Rep. | Exchange Int. | Repulsion | Orbital Relaxation |
|-------------------------|------------|-------------------|--------------------|---------------|---------------|-----------|--------------------|
| <b>PCPO-Ge(II)-AuCl</b> |            |                   |                    |               |               |           |                    |
| Me                      | Ge(II)→Au  | -62.2             | -61.3              | 106.4         | -64.2         | 170.6     | -90.8              |
|                         | O→Au       | -32.1             | -44.2              | 63.0          | -33.0         | 96.0      | -40.0              |
|                         | P→Au       | -62.3             | -74.8              | 138.3         | -77.4         | 215.7     | -107.0             |
|                         | π(C=P)→Au  | -59.0             | -77.1              | 155.0         | -83.0         | 238.1     | -111.1             |
| Mes*                    | Ge(II)→Au  | -67.8             | -68.2              | 113.2         | -68.6         | 181.9     | -94.2              |
|                         | O→Au       | -35.5             | -48.1              | 68.9          | -36.4         | 105.3     | -42.2              |
|                         | P→Au       | -57.0             | -89.0              | 177.0         | -95.6         | 272.6     | -111.0             |
|                         | π(C=P)→Au  | -55.0             | -87.8              | 178.6         | -95.8         | 274.4     | -111.6             |
| <b>PCPS-Ge(II)-AuCl</b> |            |                   |                    |               |               |           |                    |
| Me                      | Ge(II)→Au  | -61.4             | -59.2              | 104.7         | -63.0         | 167.7     | -90.1              |
|                         | S→Au       | -43.6             | -52.2              | 97.6          | -53.9         | 151.5     | -72.4              |
|                         | P→Au       | -61.6             | -74.2              | 138.6         | -77.6         | 216.2     | -106.9             |
|                         | π(C=P)→Au  | -57.9             | -76.3              | 155.7         | -83.0         | 238.7     | -110.9             |
| Mes*                    | Ge(II)→Au  | -66.8             | -65.6              | 111.2         | -67.2         | 178.4     | -93.3              |
|                         | S→Au       | -49.7             | -58.3              | 102.7         | -57.1         | 159.8     | -76.4              |
|                         | P→Au       | -60.8             | -76.2              | 143.6         | -80.7         | 224.2     | -104.7             |
|                         | π(C=P)→Au  | -53.5             | -88.0              | 180.9         | -96.8         | 277.7     | -111.3             |

**Table S20.** Calculated EDA parameters (kcal mol<sup>-1</sup>) for several model {RP=C(Sn(II)-Cl)-P(X)(Me)R}AuCl model complexes (R = Me or Mes\*; X = O or S).

| R                       | coord.mode | Total int. energy | Electrostatic Int. | Exchange-Rep. | Exchange Int. | Repulsion | Orbital Relaxation |
|-------------------------|------------|-------------------|--------------------|---------------|---------------|-----------|--------------------|
| <b>PCPO-Sn(II)-AuCl</b> |            |                   |                    |               |               |           |                    |
| Me                      | Sn(II)→Au  | -50.6             | -43.0              | 82.1          | -52.1         | 134.2     | -74.8              |
|                         | O→Au       | -33.2             | -45.8              | 64.5          | -33.9         | 98.4      | -40.7              |
|                         | P→Au       | -62.9             | -75.3              | 138.6         | -77.7         | 216.2     | -107.2             |
|                         | π(C=P)→Au  | -59.5             | -77.8              | 154.6         | -83.1         | 237.7     | -110.4             |
| Mes*                    | Sn(II)→Au  | -55.9             | -48.4              | 87.6          | -55.7         | 143.3     | -78.4              |
|                         | O→Au       | -36.7             | -49.9              | 70.8          | -37.5         | 108.3     | -43.3              |
|                         | P→Au       | -60.8             | -76.0              | 142.8         | -80.2         | 222.9     | -104.6             |
|                         | π(C=P)→Au  | -55.7             | -88.0              | 177.4         | -95.6         | 273.0     | -110.9             |
| <b>PCPS-Sn(II)-AuCl</b> |            |                   |                    |               |               |           |                    |
| Me                      | Sn(II)→Au  | -50.8             | -42.3              | 81.3          | -51.5         | 132.8     | -74.8              |
|                         | S→Au       | -44.0             | -52.6              | 97.6          | -54.0         | 151.6     | -72.3              |
|                         | P→Au       | -61.9             | -74.6              | 139.0         | -77.8         | 216.8     | -107.1             |
|                         | π(C=P)→Au  | -58.3             | -76.8              | 155.3         | -83.1         | 238.4     | -110.3             |
| Mes*                    | Sn(II)→Au  | -56.0             | -47.8              | 87.0          | -55.2         | 142.2     | -78.0              |
|                         | S→Au       | -50.3             | -58.8              | 102.8         | -57.3         | 160.1     | -76.3              |
|                         | P→Au       | -60.9             | -75.9              | 143.1         | -80.4         | 223.5     | -104.6             |
|                         | π(C=P)→Au  | -54.2             | -87.6              | 178.7         | -96.2         | 275.0     | -110.3             |

**Table S21.** Calculated EDA parameters (kcal mol<sup>-1</sup>) for several model {RP=C(Pb(II)-Cl)-P(X)(Me)R}AuCl model complexes (R = Me or Mes\*; X = O or S).

| R                       | coord.mode | Total int. energy | Electrostatic Int. | Exchange-Rep. | Exchange Int. | Repulsion | Orbital Relaxation |
|-------------------------|------------|-------------------|--------------------|---------------|---------------|-----------|--------------------|
| <b>PCPO-Pb(II)-AuCl</b> |            |                   |                    |               |               |           |                    |
| Me                      | Pb(II)→Au  | -33.7             | -24.1              | 58.7          | -36.6         | 95.4      | -55.8              |
|                         | O→Au       | -34.8             | -47.6              | 66.0          | -34.7         | 100.7     | -41.9              |
|                         | P→Au       | -63.3             | -75.5              | 138.3         | -77.6         | 215.9     | -107.1             |
|                         | π(C=P)→Au  | -60.2             | -78.9              | 154.8         | -83.5         | 238.2     | -110.2             |
| Mes*                    | Pb(II)→Au  | -38.1             | -27.7              | 62.3          | -39.0         | 101.3     | -58.7              |
|                         | O→Au       | -38.6             | -52.0              | 72.6          | -38.5         | 111.0     | -44.9              |
|                         | P→Au       | -61.0             | -75.8              | 142.2         | -79.9         | 222.1     | -104.4             |
|                         | π(C=P)→Au  | -57.0             | -89.0              | 177.0         | -95.6         | 272.6     | -111.0             |
| <b>PCPS-Pb(II)-AuCl</b> |            |                   |                    |               |               |           |                    |
| Me                      | Pb(II)→Au  | -33.8             | -23.6              | 58.0          | -36.1         | 94.2      | -55.7              |
|                         | S→Au       | -45.0             | -53.7              | 98.4          | -54.5         | 152.8     | -72.8              |
|                         | P→Au       | -62.2             | -74.7              | 138.7         | -77.7         | 216.3     | -106.9             |
|                         | π(C=P)→Au  | -59.1             | -78.0              | 155.6         | -83.5         | 239.1     | -110.3             |
| Mes*                    | Pb(II)→Au  | -38.1             | -27.5              | 61.9          | -38.7         | 100.6     | -58.0              |
|                         | S→Au       | -51.4             | -59.6              | 103.2         | -57.7         | 160.8     | -76.8              |
|                         | P→Au       | -61.1             | -75.7              | 142.3         | -80.1         | 222.4     | -104.4             |
|                         | π(C=P)→Au  | -55.5             | -88.1              | 177.5         | -95.6         | 273.1     | -110.3             |

# xyz coordinates

## PCPX model systems 24

R-P=C(Cl)-P(O)ClR.....

R = H 24

R = Me 24

R = *t*-Bu 24

R = Ph 24

R = Mes 24

R = Mes\* 25

R-P=C(Cl)-P(O)MeR.....

R = H 26

R = Me 26

R = *t*-Bu 26

R = Ph 26

R = Mes 26

R = Mes\* 27

R-P=C(Cl)-P(S)ClR.....

R = H 28

R = Me 28

R = *t*-Bu 28

R = Ph 28

R = Mes 28

R = Mes\* 29

R-P=C(Cl)-P(S)MeR.....

R = H 29

R = Me 30

R = *t*-Bu 30

R = Ph 30

R = Mes 30

R = Mes\* 31

## PCPX-E(II) model systems 31

E = Si(II).....

R-P=C(Si(II)Cl)-P(O)ClR 31

R = H.....

R = Me.....

R = *t*-Bu.....

R = Ph.....

R = Mes.....

R = Mes\*.....

R-P=C(Si(II)Cl)-P(O)MeR34

R = H.....

R = Me.....

R = *t*-Bu.....

R = Ph.....

R = Mes.....

R = Mes\*.....

R-P=C(Si(II)Cl)-P(S)ClR 36

R = H.....

R = Me.....

R = *t*-Bu.....

R = Ph.....

R = Mes\*.....

R-P=C(Si(II)Cl)-P(S)MeR 37

R = H.....

R = Me.....

R = *t*-Bu.....

R = Ph.....

R = Mes.....

R = Mes\*.....

E = Ge(II).....

R-P=C(Ge(II)Cl)-P(O)ClR 39

R = H.....

R = Me.....

R = *t*-Bu.....

R = Ph.....

R = Mes.....

R = Mes\*.....

R-P=C(Ge(II)Cl)-P(O)MeR 42

R = H.....

R = Me.....

R = *t*-Bu.....

R = Ph.....

R = Mes.....

R = Mes\*.....



|                         |    |                                       |       |
|-------------------------|----|---------------------------------------|-------|
| R-P=C(Ge(II)Cl)-P(S)ClR | 44 | R = Ph.....                           |       |
| R = H.....              |    | R = Mes.....                          | 44    |
| R = Me.....             |    | R = Mes*.....                         | 44    |
| R = <i>t</i> -Bu.....   |    | R-P=C(Pb.(II)Cl)-P(O)ClR56.....       | 44    |
| R = Ph.....             |    | R = H.....                            | 44    |
| R = Mes.....            |    | R = Me.....                           | 44    |
| R = Mes*.....           |    | R = <i>t</i> -Bu.....                 | 45    |
| R-P=C(Ge(II)Cl)-P(S)MeR | 45 | R = Ph.....                           |       |
| R = H.....              |    | R = Mes.....                          | 45    |
| R = Me.....             |    | R = Mes*.....                         | 46    |
| R = <i>t</i> -Bu.....   |    | R-P=C(Pb.(II)Cl)-P(O)MeR.....         | 58 46 |
| R = Ph.....             |    | R = H.....                            | 46    |
| R = Mes.....            |    | R = Me.....                           | 46    |
| R = Mes*.....           |    | R = <i>t</i> -Bu.....                 | 47    |
| E = Sn (II).....        |    | R = Ph.....                           | 48    |
| R-P=C(Sn(II)Cl)-P(O)ClR | 48 | R = Mes.....                          |       |
| R = H.....              |    | R = Mes*.....                         | 48    |
| R = Me.....             |    | R-P=C(Pb.(II)Cl)-P(S)ClR 60.....      | 48    |
| R = <i>t</i> -Bu.....   |    | R = H.....                            | 48    |
| R = Ph.....             |    | R = Me.....                           | 48    |
| R = Mes.....            |    | R = <i>t</i> -Bu.....                 | 48    |
| R = Mes*.....           |    | R = Ph.....                           | 49    |
| R-P=C(Sn(II)Cl)-P(O)MeR | 50 | R = Mes.....                          |       |
| R = H.....              |    | R = Mes*.....                         | 50    |
| R = Me.....             |    | R-P=C(Pb.(II)Cl)-P(S)MeR.....         | 62 50 |
| R = <i>t</i> -Bu.....   |    | R = H.....                            | 50    |
| R = Ph.....             |    | R = Me.....                           | 50    |
| R = Mes.....            |    | R = <i>t</i> -Bu.....                 | 51    |
| R = Mes*.....           |    | R = Ph.....                           | 51    |
| R-P=C(Sn(II)Cl)-P(S)ClR | 52 | R = Mes.....                          |       |
| R = H.....              |    | R = Mes*.....                         | 52    |
| R = Me.....             |    | PCPX-E(II)-AuCl model systems.....    | 64 52 |
| R = <i>t</i> -Bu.....   |    | E = Si(II).....                       | 52    |
| R = Ph.....             |    | [R-P=C(Si(II)Cl)-P(O)ClR](AuCl).....  | 64 52 |
| R = Mes.....            |    | Coordination through Si(II) atom..... | 53    |
| R = Mes*.....           |    | R = H.....                            | 53    |
| R-P=C(Sn(II)Cl)-P(S)MeR | 54 | R = Me.....                           |       |
| R = H.....              |    | R = <i>t</i> -Bu.....                 | 54    |
| R = Me.....             |    | R = Ph.....                           | 54    |
| R = <i>t</i> -Bu.....   |    | R = Mes.....                          | 54    |

|                                                    |                                                    |    |
|----------------------------------------------------|----------------------------------------------------|----|
| R = Mes *                                          | R = <i>t</i> -Bu                                   | 65 |
| Coordination through O atom                        | R = Ph                                             | 66 |
| R = H                                              | R = Mes                                            | 66 |
| R = Me                                             | R = Mes*                                           | 66 |
| R = <i>t</i> -Bu                                   | Coordination through $\pi(\text{C}=\text{P})$ bond | 67 |
| R = Ph                                             | R = H                                              | 67 |
| R = Mes                                            | R = Me                                             | 67 |
| R = Mes*                                           | R = <i>t</i> -Bu                                   | 67 |
| Coordination through P ( $\text{sp}^2$ ) atom      | R = Ph                                             | 68 |
| R = H                                              | R = Mes                                            | 68 |
| R = Me                                             | R = Mes*                                           | 68 |
| R = <i>t</i> -Bu                                   | [R-P=C(Si(II)Cl)-P(S)ClR](AuCl)                    | 81 |
| R = Ph                                             | Coordination through Si(II) atom                   | 69 |
| R = Mes                                            | R = H                                              | 69 |
| R = Mes*                                           | R = Me                                             | 69 |
| Coordination through $\pi(\text{C}=\text{P})$ bond | R = <i>t</i> -Bu                                   | 70 |
| R = H                                              | R = Ph                                             | 70 |
| R = Me                                             | R = Mes                                            | 70 |
| R = <i>t</i> -Bu                                   | R = Mes*                                           | 70 |
| R = Ph                                             | Coordination through S atom                        | 71 |
| R = Mes                                            | R = H                                              | 71 |
| R = Mes*                                           | R = Me                                             | 71 |
| [R-P=C(Si(II)Cl)-P(O)MeR](AuCl) 72                 | R = <i>t</i> -Bu                                   |    |
| Coordination through Si(II) atom                   | R = Ph                                             | 72 |
| R = H                                              | R = Mes                                            | 72 |
| R = Me                                             | R = Mes*                                           | 72 |
| R = <i>t</i> -Bu                                   | Coordination through P( $\text{sp}^2$ ) atom       | 72 |
| R = Ph                                             | R = H                                              | 73 |
| R = Mes                                            | R = Me                                             | 73 |
| R = Mes*                                           | R = <i>t</i> -Bu                                   | 73 |
| Coordination through O atom 74                     | R = Ph                                             |    |
| R = H                                              | R = Mes                                            | 74 |
| R = Me                                             | R = Mes*                                           | 74 |
| R = <i>t</i> -Bu                                   | Coordination through $\pi(\text{C}=\text{P})$ bond | 75 |
| R = Ph                                             | R = H                                              | 75 |
| R = Mes                                            | R = Me                                             | 75 |
| R = Mes*                                           | R = <i>t</i> -Bu                                   | 76 |
| Coordination through P( $\text{sp}^2$ ) atom       | R = Ph                                             | 76 |
| R = H                                              | R = Mes                                            | 76 |
| R = Me                                             | R = Mes*                                           | 77 |

|                                               |    |                                               |       |     |
|-----------------------------------------------|----|-----------------------------------------------|-------|-----|
| [R-P=C(Si(II)Cl)-P(S)MeR](AuCl)               | 89 | R = H                                         | ..... | 89  |
| Coordination through Si(II) atom              |    | R = Me                                        | ..... | 89  |
| R = H                                         |    | R = <i>t</i> -Bu                              | ..... | 89  |
| R = Me                                        |    | R = Ph                                        | ..... | 89  |
| R = <i>t</i> -Bu                              |    | R = Mes                                       | ..... | 89  |
| R = Ph                                        |    | R = Mes*                                      | ..... | 90  |
| R = Mes                                       |    | Coordination through P(sp <sup>2</sup> ) atom | ..... | 90  |
| R = Mes*                                      |    | R = H                                         | ..... | 90  |
| Coordination through S atom                   |    | R = Me                                        | ..... | 91  |
| R = H                                         |    | R = <i>t</i> -Bu                              | ..... | 91  |
| R = Me                                        |    | R = Ph                                        | ..... | 91  |
| R = <i>t</i> -Bu                              |    | R = Mes                                       | ..... | 91  |
| R = Ph                                        |    | R = Mes*                                      | ..... | 92  |
| R = Mes                                       |    | Coordination through π(C=P) bond              | ..... | 92  |
| R = Mes*                                      |    | R = H                                         | ..... | 92  |
| Coordination through P(sp <sup>2</sup> ) atom |    | R = Me                                        | ..... | 93  |
| R = H                                         |    | R = <i>t</i> -Bu                              | ..... | 93  |
| R = Me                                        |    | R = Ph                                        | ..... | 93  |
| R = <i>t</i> -Bu                              |    | R = Mes                                       | ..... | 93  |
| R = Ph                                        |    | R = Mes*                                      | ..... | 94  |
| R = Mes                                       |    | [R-P=C(Ge(II)Cl)-P(O)MeR](AuCl)               | 106   | 94  |
| R = Mes*                                      |    | Coordination through Ge(II) atom              | ..... | 94  |
| Coordination through π(C=P) bond              |    | R = H                                         | ..... | 96  |
| R = H                                         |    | R = Me                                        | ..... | 96  |
| R = Me                                        |    | R = <i>t</i> -Bu                              | ..... | 96  |
| R = <i>t</i> -Bu                              |    | R = Ph                                        | ..... | 96  |
| R = Ph                                        |    | R = Mes                                       | ..... | 96  |
| R = Mes                                       |    | R = Mes*                                      | ..... | 96  |
| R = Mes*                                      |    | Coordination through O atom                   | ..... | 97  |
| PCPX-E(II)-AuCl model systems                 | 98 | R = H                                         | ..... | 98  |
| E = Ge(II)                                    |    | R = Me                                        | ..... | 98  |
| [R-P=C(Ge(II)Cl)-P(O)CIR](AuCl)               | 98 | R = <i>t</i> -Bu                              | ..... | 98  |
| Coordination through Ge(II) atom              |    | R = Ph                                        | ..... | 98  |
| R = H                                         |    | R = Mes                                       | ..... | 98  |
| R = Me                                        |    | R = Mes*                                      | ..... | 98  |
| R = <i>t</i> -Bu                              |    | Coordination through P(sp <sup>2</sup> ) atom | ..... | 98  |
| R = Ph                                        |    | R = H                                         | ..... | 98  |
| R = Mes                                       |    | R = Me                                        | ..... | 98  |
| R = Mes*                                      |    | R = <i>t</i> -Bu                              | ..... | 99  |
| Coordination through O atom                   |    | R = Ph                                        | ..... | 100 |

|                                                          |                                                          |     |
|----------------------------------------------------------|----------------------------------------------------------|-----|
| R = Mes .....                                            | R = H .....                                              | 111 |
| R = Mes* .....                                           | R = Me .....                                             | 111 |
| Coordination through $\pi(\text{C}=\text{P})$ bond ..... | R = <i>t</i> -Bu .....                                   | 112 |
| R = H .....                                              | R = Ph .....                                             | 112 |
| R = Me .....                                             | R = Mes .....                                            | 112 |
| R = <i>t</i> -Bu .....                                   | R = Mes* .....                                           | 112 |
| R = Ph .....                                             | Coordination through S atom .....                        | 113 |
| R = Mes .....                                            | R = H .....                                              | 113 |
| R = Mes* .....                                           | R = Me .....                                             | 113 |
| [R-P=C(Ge(II)Cl)-P(S)ClR](AuCl) 114                      | R = <i>t</i> -Bu .....                                   |     |
| Coordination through Ge(II) atom .....                   | R = Ph .....                                             | 114 |
| R = H .....                                              | R = Mes .....                                            | 114 |
| R = Me .....                                             | R = Mes* .....                                           | 114 |
| R = <i>t</i> -Bu .....                                   | Coordination through P(sp <sup>2</sup> ) atom .....      | 114 |
| R = Ph .....                                             | R = H .....                                              | 115 |
| R = Mes .....                                            | R = Me .....                                             | 115 |
| R = Mes* .....                                           | R = <i>t</i> -Bu .....                                   | 115 |
| Coordination through S atom .....                        | R = Ph .....                                             | 116 |
| R = H .....                                              | R = Mes .....                                            | 116 |
| R = Me .....                                             | R = Mes* .....                                           | 116 |
| R = <i>t</i> -Bu .....                                   | Coordination through $\pi(\text{C}=\text{P})$ bond ..... | 116 |
| R = Ph .....                                             | R = H .....                                              | 117 |
| R = Mes .....                                            | R = Me .....                                             | 117 |
| R = Mes* .....                                           | R = <i>t</i> -Bu .....                                   | 117 |
| Coordination through P(sp <sup>2</sup> ) atom .....      | R = Ph .....                                             | 118 |
| R = H .....                                              | R = Mes .....                                            | 118 |
| R = Me .....                                             | R = Mes* .....                                           | 118 |
| R = <i>t</i> -Bu .....                                   | E = Sn(II) .....                                         | 118 |
| R = Ph .....                                             | [R-P=C(Sn(II)Cl)-P(O)ClR](AuCl) ... 131 .....            | 119 |
| R = Mes .....                                            | Coordination through Sn(II) atom .....                   | 119 |
| R = Mes* .....                                           | R = H .....                                              | 119 |
| Coordination through $\pi(\text{C}=\text{P})$ bond ..... | R = Me .....                                             | 120 |
| R = H .....                                              | R = <i>t</i> -Bu .....                                   | 120 |
| R = Me .....                                             | R = Ph .....                                             | 120 |
| R = <i>t</i> -Bu .....                                   | R = Mes .....                                            | 120 |
| R = Ph .....                                             | R = Mes* .....                                           | 121 |
| R = Mes .....                                            | Coordination through O atom .....                        | 121 |
| R = Mes* .....                                           | R = H .....                                              | 121 |
| [R-P=C(Ge(II)Cl)-P(S)MeR](AuCl) 122                      | R = Me .....                                             |     |
| Coordination through Ge(II) atom .....                   | R = <i>t</i> -Bu .....                                   | 122 |

|                                               |                                               |         |
|-----------------------------------------------|-----------------------------------------------|---------|
| R = Ph                                        | R = H                                         | 133     |
| R = Mes                                       | R = Me                                        | 133     |
| R = Mes*                                      | R = <i>t</i> -Bu                              | 134     |
| Coordination through P(sp <sup>2</sup> ) atom | R = Ph                                        | 135     |
| R = H                                         | R = Mes                                       | 135     |
| R = Me                                        | R = Mes*                                      | 135     |
| R = <i>t</i> -Bu                              | [R-P=C(Sn(II)Cl)-P(S)ClR](AuCl)               | 147 135 |
| R = Ph                                        | Coordination through Sn(II) atom              | 135     |
| R = Mes                                       | R = H                                         | 135     |
| R = Mes*                                      | R = Me                                        | 136     |
| Coordination through π(C=P) bond              | R = <i>t</i> -Bu                              | 137     |
| R = H                                         | R = Ph                                        | 137     |
| R = Me                                        | R = Mes                                       | 137     |
| R = <i>t</i> -Bu                              | R = Mes*                                      | 137     |
| R = Ph                                        | Coordination through S atom                   | 137     |
| R = Mes                                       | R = H                                         | 137     |
| R = Mes*                                      | R = Me                                        | 138     |
| [R-P=C(Sn(II)Cl)-P(O)MeR](AuCl) 139           | R = <i>t</i> -Bu                              |         |
| Coordination through Sn(II) atom              | R = Ph                                        | 139     |
| R = H                                         | R = Mes                                       | 139     |
| R = Me                                        | R = Mes*                                      | 139     |
| R = <i>t</i> -Bu                              | Coordination through P(sp <sup>2</sup> ) atom | 139     |
| R = Ph                                        | R = H                                         | 139     |
| R = Mes                                       | R = Me                                        | 139     |
| R = Mes*                                      | R = <i>t</i> -Bu                              | 140     |
| Coordination through O atom                   | R = Ph                                        | 141     |
| R = H                                         | R = Mes                                       | 141     |
| R = Me                                        | R = Mes*                                      | 141     |
| R = <i>t</i> -Bu                              | Coordination through π(C=P) bond              | 141     |
| R = Ph                                        | R = H                                         | 141     |
| R = Mes                                       | R = Me                                        | 142     |
| R = Mes*                                      | R = <i>t</i> -Bu                              | 142     |
| Coordination through P(sp <sup>2</sup> ) atom | R = Ph                                        | 143     |
| R = H                                         | R = Mes                                       | 143     |
| R = Me                                        | R = Mes*                                      | 143     |
| R = <i>t</i> -Bu                              | [R-P=C(Sn(II)Cl)-P(S)MeR](AuCl) 155           | 143     |
| R = Ph                                        | Coordination through Sn(II) atom              | 143     |
| R = Mes                                       | R = H                                         | 144     |
| R = Mes*                                      | R = Me                                        | 144     |
| Coordination through π(C=P) bond              | R = <i>t</i> -Bu                              | 145     |

|                                                    |                                                    |     |
|----------------------------------------------------|----------------------------------------------------|-----|
| R = Ph                                             | R = H                                              | 156 |
| R = Mes                                            | R = Me                                             | 156 |
| R = Mes*                                           | R = <i>t</i> -Bu                                   | 156 |
| Coordination through S atom                        | R = Ph                                             | 157 |
| R = H                                              | R = Mes                                            | 157 |
| R = Me                                             | R = Mes*                                           | 157 |
| R = <i>t</i> -Bu                                   | Coordination through $\pi(\text{C}=\text{P})$ bond | 157 |
| R = Ph                                             | R = H                                              | 158 |
| R = Mes                                            | R = Me                                             | 158 |
| R = Mes*                                           | R = <i>t</i> -Bu                                   | 158 |
| Coordination through P(sp <sup>2</sup> ) atom      | R = Ph                                             | 159 |
| R = H                                              | R = Mes                                            | 159 |
| R = Me                                             | R = Mes*                                           | 159 |
| R = <i>t</i> -Bu                                   | [R-P=C(Pb(II)Cl)-P(O)MeR](AuCl) 172                | 160 |
| R = Ph                                             | Coordination through Pb(II) atom                   | 160 |
| R = Mes                                            | R = H                                              | 160 |
| R = Mes*                                           | R = Me                                             | 161 |
| Coordination through $\pi(\text{C}=\text{P})$ bond | R = <i>t</i> -Bu                                   | 161 |
| R = H                                              | R = Ph                                             | 161 |
| R = Me                                             | R = Mes                                            | 161 |
| R = <i>t</i> -Bu                                   | R = Mes*                                           | 162 |
| R = Ph                                             | Coordination through O atom                        | 162 |
| R = Mes                                            | R = H                                              | 162 |
| R = Mes*                                           | R = Me                                             | 163 |
| [R-P=C(Pb(II)Cl)-P(O)CIR](AuCl) 164                | R = <i>t</i> -Bu                                   |     |
| Coordination through Pb(II) atom                   | R = Ph                                             | 164 |
| R = H                                              | R = Mes                                            | 164 |
| R = Me                                             | R = Mes*                                           | 164 |
| R = <i>t</i> -Bu                                   | Coordination through P(sp <sup>2</sup> ) atom      | 164 |
| R = Ph                                             | R = H                                              | 164 |
| R = Mes                                            | R = Me                                             | 164 |
| R = Mes*                                           | R = <i>t</i> -Bu                                   | 165 |
| Coordination through O atom                        | R = Ph                                             | 166 |
| R = H                                              | R = Mes                                            | 166 |
| R = Me                                             | R = Mes*                                           | 166 |
| R = <i>t</i> -Bu                                   | Coordination through $\pi(\text{C}=\text{P})$ bond | 166 |
| R = Ph                                             | R = H                                              | 166 |
| R = Mes                                            | R = Me                                             | 166 |
| R = Mes*                                           | R = <i>t</i> -Bu                                   | 167 |
| Coordination through P(sp <sup>2</sup> ) atom      | R = Ph                                             | 168 |

|                                                     |                                                     |     |
|-----------------------------------------------------|-----------------------------------------------------|-----|
| R = Mes .....                                       | R = Mes* .....                                      | 179 |
| R = Mes* .....                                      | [R-P=C(Pb(II)Cl)-P(S)MeR](AuCl) .....               | 179 |
| [R-P=C(Pb(II)Cl)-P(S)ClR](AuCl) 180                 | Coordination through Pb(II) atom .....              |     |
| Coordination through Pb(II) atom .....              | R = H .....                                         | 180 |
| R = H .....                                         | R = Me .....                                        | 180 |
| R = Me .....                                        | R = <i>t</i> -Bu .....                              | 180 |
| R = <i>t</i> -Bu .....                              | R = Ph .....                                        | 180 |
| R = Ph .....                                        | R = Mes .....                                       | 181 |
| R = Mes .....                                       | R = Mes* .....                                      | 181 |
| R = Mes* .....                                      | Coordination through S atom .....                   | 181 |
| Coordination through S atom .....                   | R = H .....                                         | 182 |
| R = H .....                                         | R = Me .....                                        | 182 |
| R = Me .....                                        | R = <i>t</i> -Bu .....                              | 182 |
| R = <i>t</i> -Bu .....                              | R = Ph .....                                        | 182 |
| R = Ph .....                                        | R = Mes .....                                       | 183 |
| R = Mes .....                                       | R = Mes* .....                                      | 183 |
| R = Mes* .....                                      | Coordination through P(sp <sup>2</sup> ) atom ..... | 183 |
| Coordination through P(sp <sup>2</sup> ) atom ..... | R = H .....                                         | 184 |
| R = H .....                                         | R = Me .....                                        | 184 |
| R = Me .....                                        | R = <i>t</i> -Bu .....                              | 184 |
| R = <i>t</i> -Bu .....                              | R = Ph .....                                        | 184 |
| R = Ph .....                                        | R = Mes .....                                       | 185 |
| R = Mes .....                                       | R = Mes* .....                                      | 185 |
| R = Mes* .....                                      | Coordination through π(C=P) bond .....              | 185 |
| Coordination through π(C=P) bond .....              | R = H .....                                         | 186 |
| R = H .....                                         | R = Me .....                                        | 186 |
| R = Me .....                                        | R = <i>t</i> -Bu .....                              | 186 |
| R = <i>t</i> -Bu .....                              | R = Ph .....                                        | 186 |
| R = Ph .....                                        | R = Mes .....                                       | 187 |
| R = Mes .....                                       | R = Mes* .....                                      | 187 |

## PCPX model systems

### R-P=C(Cl)-P(O)CIR

#### R= H

|    |          |          |          |
|----|----------|----------|----------|
| P  | 1.79405  | 0.09029  | -2.25367 |
| C  | 0.31215  | -0.02845 | -1.48610 |
| P  | -1.04264 | -0.75902 | -2.42456 |
| Cl | -0.09833 | 0.41754  | 0.11870  |
| O  | -0.65622 | -1.31089 | -3.72351 |
| Cl | -2.43636 | 0.70450  | -2.48890 |
| H  | 2.46714  | 0.68669  | -1.14569 |
| H  | -1.65784 | -1.63561 | -1.50952 |

#### R= Me

|    |          |          |          |
|----|----------|----------|----------|
| P  | 1.77770  | 0.04145  | -2.18154 |
| C  | 0.27617  | -0.02102 | -1.44367 |
| P  | -1.05425 | -0.77986 | -2.39304 |
| Cl | -0.12714 | 0.54600  | 0.13283  |
| O  | -0.62108 | -1.23927 | -3.71641 |
| C  | -1.82992 | -2.02023 | -1.35494 |
| H  | -2.11693 | -1.60938 | -0.38776 |
| H  | -2.71261 | -2.38967 | -1.87876 |
| H  | -1.11927 | -2.83833 | -1.22257 |
| C  | 2.81082  | 0.86042  | -0.90554 |
| H  | 2.82660  | 0.27547  | 0.01723  |
| H  | 3.82783  | 0.95642  | -1.28691 |
| H  | 2.41973  | 1.85301  | -0.66912 |
| Cl | -2.46933 | 0.68703  | -2.45700 |

#### R= t-Bu

|    |          |          |          |
|----|----------|----------|----------|
| P  | 1.16488  | -1.27309 | -0.56412 |
| C  | 0.59535  | -0.01290 | -1.51112 |
| P  | -0.98752 | -0.39204 | -2.31823 |
| Cl | 1.27291  | 1.54587  | -1.81101 |
| O  | -1.60410 | -1.60355 | -1.75911 |
| C  | 2.79754  | -0.77278 | 0.21508  |
| C  | -0.81468 | -0.46707 | -4.15116 |
| C  | 3.19493  | -2.00439 | 1.03587  |
| H  | 3.31943  | -2.88879 | 0.40514  |
| H  | 4.14619  | -1.81511 | 1.54263  |
| H  | 2.44823  | -2.24089 | 1.79862  |
| C  | 3.87046  | -0.51008 | -0.83869 |
| H  | 3.65473  | 0.37387  | -1.43757 |
| H  | 4.83353  | -0.35381 | -0.34007 |
| H  | 3.98609  | -1.36313 | -1.51283 |
| C  | 2.62332  | 0.41701  | 1.15621  |
| H  | 2.36716  | 1.33242  | 0.62442  |
| H  | 1.84771  | 0.22612  | 1.90252  |
| H  | 3.56204  | 0.58953  | 1.69430  |
| C  | -0.27165 | 0.80300  | -4.79466 |
| H  | 0.75657  | 1.01001  | -4.49737 |
| H  | -0.28498 | 0.67291  | -5.88120 |
| H  | -0.88243 | 1.67454  | -4.55408 |
| C  | -2.21666 | -0.77153 | -4.68685 |
| H  | -2.90149 | 0.06186  | -4.51864 |
| H  | -2.14805 | -0.93995 | -5.76554 |
| H  | -2.63603 | -1.66432 | -4.22120 |
| C  | 0.11373  | -1.65142 | -4.43525 |
| H  | 1.12855  | -1.46710 | -4.07566 |
| H  | -0.25676 | -2.56832 | -3.97363 |

|    |          |          |          |
|----|----------|----------|----------|
| H  | 0.16420  | -1.80646 | -5.51687 |
| Cl | -2.08643 | 1.29560  | -1.97265 |

#### R = Ph

|    |          |          |          |
|----|----------|----------|----------|
| P  | 1.06821  | -1.05973 | -0.36084 |
| C  | 0.80585  | -0.30830 | -1.83838 |
| P  | -0.79193 | -0.69339 | -2.59101 |
| Cl | 1.81880  | 0.76739  | -2.71673 |
| O  | -1.60898 | -1.57138 | -1.74487 |
| C  | -0.50386 | -1.33437 | -4.24480 |
| C  | -0.66944 | -2.71034 | -4.39650 |
| C  | -0.12116 | -0.55349 | -5.33284 |
| C  | -0.44557 | -3.29986 | -5.63062 |
| H  | -0.98924 | -3.30230 | -3.54680 |
| C  | 0.10256  | -1.15043 | -6.56237 |
| H  | -0.01113 | 0.51805  | -5.22186 |
| C  | -0.05710 | -2.52159 | -6.71104 |
| H  | -0.58124 | -4.36860 | -5.74910 |
| H  | 0.39621  | -0.54213 | -7.40995 |
| H  | 0.11509  | -2.98362 | -7.67663 |
| C  | 2.73669  | -0.57428 | 0.15890  |
| C  | 3.87674  | -0.64990 | -0.64379 |
| C  | 2.87740  | -0.22199 | 1.50333  |
| C  | 5.12195  | -0.35347 | -0.11580 |
| H  | 3.79209  | -0.95008 | -1.68073 |
| C  | 4.12177  | 0.09849  | 2.02221  |
| H  | 2.00306  | -0.19423 | 2.14650  |
| C  | 5.24580  | 0.03155  | 1.21269  |
| H  | 6.00202  | -0.42130 | -0.74521 |
| H  | 4.21466  | 0.38806  | 3.06257  |
| H  | 6.22225  | 0.26896  | 1.61931  |
| Cl | -1.59855 | 1.14800  | -2.90187 |

#### R = Mes

|    |          |          |          |
|----|----------|----------|----------|
| P  | 1.64974  | -1.72979 | -1.07216 |
| C  | 0.86245  | -0.53173 | -1.94196 |
| P  | -0.77366 | -0.88482 | -2.64264 |
| Cl | 1.31459  | 1.11891  | -2.06143 |
| O  | -1.82859 | -0.17986 | -1.90401 |
| C  | 3.05446  | -0.86528 | -0.30122 |
| C  | 4.32397  | -0.96292 | -0.88336 |
| C  | 2.88031  | -0.19781 | 0.92006  |
| C  | 5.40517  | -0.37731 | -0.23579 |
| C  | 3.98942  | 0.37033  | 1.53150  |
| C  | 5.26004  | 0.29134  | 0.97234  |
| H  | 6.38887  | -0.44623 | -0.69122 |
| H  | 3.85592  | 0.89113  | 2.47542  |
| C  | -0.94608 | -2.67638 | -2.79894 |
| C  | -1.93266 | -3.32061 | -2.01589 |
| C  | -0.13058 | -3.43693 | -3.66485 |
| C  | -2.07935 | -4.69736 | -2.13987 |
| C  | -0.32644 | -4.80960 | -3.73628 |
| C  | -1.29906 | -5.46089 | -2.99388 |
| H  | -2.83365 | -5.18876 | -1.53340 |
| H  | 0.31255  | -5.38820 | -4.39654 |
| C  | 4.52321  | -1.65336 | -2.19950 |
| H  | 4.03723  | -2.63440 | -2.21970 |
| H  | 4.09676  | -1.06788 | -3.01972 |
| H  | 5.58361  | -1.79967 | -2.40928 |
| C  | 1.52881  | -0.07976 | 1.55787  |
| H  | 0.85442  | 0.52986  | 0.94985  |



|    |          |          |          |
|----|----------|----------|----------|
| H  | 1.05338  | -1.05824 | 1.67895  |
| H  | 1.60241  | 0.38035  | 2.54393  |
| C  | 6.44284  | 0.88843  | 1.67169  |
| H  | 6.81097  | 0.21819  | 2.45480  |
| H  | 7.26636  | 1.06824  | 0.97884  |
| H  | 6.18501  | 1.83527  | 2.15057  |
| C  | -1.51003 | -6.93705 | -3.12115 |
| H  | -1.89035 | -7.36671 | -2.19288 |
| H  | -2.24186 | -7.15359 | -3.90580 |
| H  | -0.58461 | -7.45080 | -3.38716 |
| C  | 0.94942  | -2.87451 | -4.54502 |
| H  | 0.53495  | -2.53299 | -5.49642 |
| H  | 1.47447  | -2.03081 | -4.10149 |
| H  | 1.68311  | -3.65256 | -4.76165 |
| C  | -2.83943 | -2.63211 | -1.03583 |
| H  | -2.28245 | -2.06416 | -0.29014 |
| H  | -3.49693 | -1.91451 | -1.52602 |
| H  | -3.44833 | -3.37782 | -0.52338 |
| Cl | -0.66768 | -0.15822 | -4.54839 |

**R = Mes\***

|    |          |          |          |
|----|----------|----------|----------|
| P  | 2.29541  | -1.92892 | -0.69160 |
| C  | 1.33217  | -1.01845 | -1.71583 |
| P  | -0.25305 | -1.61620 | -2.42336 |
| Cl | 1.51248  | 0.67005  | -2.00997 |
| O  | -1.34611 | -0.90380 | -1.74264 |
| C  | 3.51219  | -0.73546 | 0.01625  |
| C  | 4.76688  | -0.52942 | -0.60954 |
| C  | 3.19276  | -0.01400 | 1.20091  |
| C  | 5.57995  | 0.49855  | -0.13356 |
| C  | 4.06079  | 0.99263  | 1.60229  |
| C  | 5.23782  | 1.30085  | 0.93774  |
| H  | 6.52224  | 0.67651  | -0.62489 |
| H  | 3.81316  | 1.56505  | 2.48338  |
| C  | -0.65204 | -3.39253 | -2.66553 |
| C  | -1.78556 | -3.83160 | -1.91852 |
| C  | -0.32440 | -4.09761 | -3.86406 |
| C  | -2.70574 | -4.65972 | -2.55825 |
| C  | -1.28704 | -4.93192 | -4.41109 |
| C  | -2.52806 | -5.15729 | -3.83409 |
| H  | -3.60576 | -4.91647 | -2.01980 |
| H  | -1.05363 | -5.43065 | -5.34273 |
| C  | 5.32016  | -1.35948 | -1.78740 |
| C  | 1.96817  | -0.27992 | 2.10358  |
| C  | 6.11043  | 2.45357  | 1.42477  |
| C  | -3.58224 | -5.97800 | -4.56608 |
| C  | 1.04292  | -4.18044 | -4.57807 |
| C  | -2.09136 | -3.59526 | -0.42158 |
| C  | 4.64884  | -0.93789 | -3.09783 |
| H  | 3.57245  | -1.09057 | -3.07806 |
| H  | 4.83188  | 0.12077  | -3.29516 |
| H  | 5.05788  | -1.51586 | -3.93180 |
| C  | 6.82817  | -1.15183 | -1.98188 |
| H  | 7.07377  | -0.14459 | -2.32425 |
| H  | 7.39370  | -1.35895 | -1.07014 |
| H  | 7.17548  | -1.84189 | -2.75428 |
| C  | 5.15036  | -2.86208 | -1.54237 |
| H  | 5.63999  | -3.16117 | -0.61227 |
| H  | 4.10762  | -3.18283 | -1.48465 |
| C  | 0.68821  | 0.29822  | 1.49011  |
| H  | 0.79277  | 1.37485  | 1.33798  |

|    |          |          |          |
|----|----------|----------|----------|
| H  | 0.43235  | -0.14638 | 0.53142  |
| H  | -0.15408 | 0.13263  | 2.16797  |
| C  | 2.12029  | 0.37891  | 3.48147  |
| H  | 3.04437  | 0.08035  | 3.98265  |
| H  | 2.08450  | 1.46925  | 3.43202  |
| H  | 1.28323  | 0.06384  | 4.10850  |
| C  | 1.81492  | -1.77690 | 2.39028  |
| H  | 1.60078  | -2.37378 | 1.50074  |
| H  | 2.72180  | -2.17834 | 2.84971  |
| H  | 0.98064  | -1.93706 | 3.07821  |
| C  | 7.35509  | 2.64475  | 0.56220  |
| H  | 7.93333  | 3.49161  | 0.93967  |
| H  | 8.00582  | 1.76688  | 0.58423  |
| H  | 7.09868  | 2.85744  | -0.47872 |
| C  | 5.29574  | 3.75197  | 1.38479  |
| H  | 4.96573  | 3.97463  | 0.36721  |
| H  | 4.40845  | 3.69284  | 2.01818  |
| H  | 5.90370  | 4.58978  | 1.73773  |
| C  | 6.56124  | 2.18276  | 2.86508  |
| H  | 7.18309  | 3.00658  | 3.22676  |
| H  | 5.71183  | 2.08346  | 3.54382  |
| H  | 7.14740  | 1.26232  | 2.92419  |
| C  | -3.34172 | -2.73154 | -0.23129 |
| H  | -4.21182 | -3.17626 | -0.72055 |
| H  | -3.56888 | -2.64649 | 0.83557  |
| H  | -3.18306 | -1.73428 | -0.63874 |
| C  | -2.34624 | -4.98019 | 0.21191  |
| H  | -2.48922 | -4.85203 | 1.28786  |
| H  | -3.23522 | -5.47777 | -0.17495 |
| H  | -1.49244 | -5.64591 | 0.06145  |
| C  | -0.93487 | -3.00877 | 0.37833  |
| H  | -0.01132 | -3.56566 | 0.20067  |
| H  | -0.77213 | -1.95773 | 0.16152  |
| H  | -1.16605 | -3.08771 | 1.44372  |
| C  | 0.95085  | -3.80867 | -6.06203 |
| H  | 1.92930  | -3.94546 | -6.53086 |
| H  | 0.23895  | -4.43412 | -6.60317 |
| H  | 0.65462  | -2.76816 | -6.19299 |
| C  | 1.49158  | -5.65219 | -4.46782 |
| H  | 2.47809  | -5.76428 | -4.92635 |
| H  | 1.56614  | -5.95847 | -3.42152 |
| H  | 0.80886  | -6.33789 | -4.97038 |
| C  | 2.15580  | -3.36819 | -3.94150 |
| H  | 2.26006  | -3.60634 | -2.88229 |
| H  | 3.10107  | -3.61589 | -4.43106 |
| H  | 2.01239  | -2.29620 | -4.04995 |
| C  | -3.89338 | -5.30176 | -5.90677 |
| H  | -3.00466 | -5.22386 | -6.53621 |
| H  | -4.64311 | -5.87972 | -6.45424 |
| H  | -4.28414 | -4.29297 | -5.75414 |
| C  | -3.04827 | -7.39225 | -4.82259 |
| H  | -2.14468 | -7.38080 | -5.43542 |
| H  | -2.81121 | -7.89737 | -3.88303 |
| H  | -3.79977 | -7.98716 | -5.34913 |
| C  | -4.88123 | -6.09071 | -3.77276 |
| H  | -4.73825 | -6.62198 | -2.82838 |
| H  | -5.30878 | -5.10895 | -3.55484 |
| H  | -5.61643 | -6.65110 | -4.35525 |
| Cl | -0.15977 | -0.93409 | -4.35504 |
| H  | 5.60303  | -3.42295 | -2.36445 |

## R-P=C(Cl)-P(O)MeR

### R = H

|    |          |          |          |
|----|----------|----------|----------|
| P  | 1.81869  | 0.09240  | -2.16926 |
| C  | 0.30915  | -0.04938 | -1.46467 |
| P  | -1.04359 | -0.70280 | -2.48218 |
| Cl | -0.13776 | 0.33233  | 0.15530  |
| O  | -0.60076 | -1.16767 | -3.80972 |
| H  | 2.46307  | 0.61837  | -1.00869 |
| H  | -1.57582 | -1.69304 | -1.61876 |
| C  | -2.31618 | 0.56978  | -2.48485 |
| H  | -3.19857 | 0.16483  | -2.98378 |
| H  | -2.57549 | 0.87559  | -1.47051 |
| H  | -1.95047 | 1.42776  | -3.05119 |

### R = Me

|    |          |          |          |
|----|----------|----------|----------|
| P  | 1.77521  | 0.03941  | -2.15795 |
| C  | 0.26259  | -0.00627 | -1.44631 |
| P  | -1.09488 | -0.72326 | -2.41541 |
| Cl | -0.14433 | 0.56673  | 0.13637  |
| O  | -0.63639 | -1.17748 | -3.74482 |
| C  | -1.77001 | -2.03378 | -1.37427 |
| H  | -2.03890 | -1.67148 | -0.38137 |
| H  | -2.65474 | -2.44081 | -1.86810 |
| H  | -1.02240 | -2.82345 | -1.28755 |
| C  | 2.81069  | 0.82309  | -0.85696 |
| H  | 2.80446  | 0.22696  | 0.05870  |
| H  | 3.83437  | 0.90225  | -1.22455 |
| H  | 2.44031  | 1.82142  | -0.61202 |
| C  | -2.36174 | 0.56123  | -2.46497 |
| H  | -1.98359 | 1.39446  | -3.05890 |
| H  | -3.24510 | 0.15087  | -2.95850 |
| H  | -2.62932 | 0.91225  | -1.46767 |

### R = t-Bu

|    |          |          |          |
|----|----------|----------|----------|
| P  | 1.13042  | -1.26021 | -0.55769 |
| C  | 0.57279  | -0.00127 | -1.50930 |
| P  | -1.04478 | -0.31754 | -2.29831 |
| Cl | 1.28064  | 1.55518  | -1.80953 |
| O  | -1.65905 | -1.54843 | -1.74796 |
| C  | -2.00651 | 1.17735  | -1.97136 |
| H  | -1.51650 | 2.08521  | -2.32096 |
| H  | -2.98153 | 1.07377  | -2.44986 |
| H  | -2.15570 | 1.23748  | -0.89199 |
| C  | 2.78438  | -0.78688 | 0.20026  |
| C  | -0.80323 | -0.45033 | -4.12944 |
| C  | 3.17283  | -2.02362 | 1.01718  |
| H  | 3.27229  | -2.91061 | 0.38561  |
| H  | 4.13445  | -1.85127 | 1.51071  |
| H  | 2.43227  | -2.24671 | 1.78996  |
| C  | 3.84887  | -0.54367 | -0.86642 |
| H  | 3.64168  | 0.34393  | -1.46304 |
| H  | 4.82189  | -0.40522 | -0.38151 |
| H  | 3.93875  | -1.39843 | -1.54228 |
| C  | 2.64667  | 0.40597  | 1.14327  |
| H  | 2.39868  | 1.32538  | 0.61417  |
| H  | 1.87853  | 0.22876  | 1.90079  |
| H  | 3.59577  | 0.56329  | 1.66809  |
| C  | -0.30585 | 0.82393  | -4.80414 |
| H  | 0.69162  | 1.10918  | -4.46910 |
| H  | -0.25768 | 0.65524  | -5.88488 |
| H  | -0.97832 | 1.66856  | -4.63726 |
| C  | -2.17771 | -0.82878 | -4.69239 |
| H  | -2.90307 | -0.01862 | -4.58182 |
| H  | -2.07823 | -1.03538 | -5.76244 |
| H  | -2.57555 | -1.71732 | -4.20046 |

|   |          |          |          |
|---|----------|----------|----------|
| C | 0.17365  | -1.59958 | -4.37638 |
| H | 1.18152  | -1.35285 | -4.03551 |
| H | -0.14954 | -2.50810 | -3.86416 |
| H | 0.22239  | -1.80838 | -5.44947 |

### R = Ph

|    |          |          |          |
|----|----------|----------|----------|
| P  | 1.05272  | -1.10621 | -0.37323 |
| C  | 0.75340  | -0.29653 | -1.81014 |
| P  | -0.85670 | -0.65742 | -2.57778 |
| Cl | 1.74257  | 0.85345  | -2.63450 |
| O  | -1.64248 | -1.59577 | -1.74729 |
| C  | -1.63165 | 0.95062  | -2.82682 |
| H  | -0.99828 | 1.63976  | -3.38508 |
| H  | -2.56876 | 0.79367  | -3.36364 |
| H  | -1.84789 | 1.37219  | -1.84381 |
| C  | -0.49131 | -1.32374 | -4.21953 |
| C  | -0.68999 | -2.69324 | -4.38325 |
| C  | -0.04924 | -0.55944 | -5.29783 |
| C  | -0.44197 | -3.29134 | -5.60891 |
| H  | -1.05385 | -3.27171 | -3.54144 |
| C  | 0.19675  | -1.16111 | -6.52198 |
| H  | 0.10736  | 0.50709  | -5.18878 |
| C  | 0.00276  | -2.52660 | -6.67753 |
| H  | -0.60129 | -4.35663 | -5.73102 |
| H  | 0.53878  | -0.56177 | -7.35802 |
| H  | 0.19449  | -2.99419 | -7.63681 |
| C  | 2.72079  | -0.59776 | 0.13933  |
| C  | 3.84958  | -0.66404 | -0.67944 |
| C  | 2.87940  | -0.24058 | 1.47981  |
| C  | 5.10050  | -0.35462 | -0.17196 |
| H  | 3.75080  | -0.96656 | -1.71490 |
| C  | 4.12903  | 0.09081  | 1.97975  |
| H  | 2.01475  | -0.21867 | 2.13618  |
| C  | 5.24169  | 0.03284  | 1.15394  |
| H  | 5.97115  | -0.41489 | -0.81524 |
| H  | 4.23507  | 0.38242  | 3.01841  |
| H  | 6.22207  | 0.27921  | 1.54561  |

### R = Mes

|    |          |          |          |
|----|----------|----------|----------|
| P  | 1.61470  | -1.72697 | -1.06597 |
| C  | 0.84404  | -0.53944 | -1.96016 |
| P  | -0.77665 | -0.85553 | -2.74245 |
| Cl | 1.33187  | 1.10948  | -2.10002 |
| O  | -1.86427 | -0.18032 | -1.99892 |
| C  | -0.65692 | -0.16442 | -4.41140 |
| H  | 0.32186  | -0.26021 | -4.87482 |
| H  | -1.41492 | -0.63484 | -5.04030 |
| H  | -0.90310 | 0.89229  | -4.29825 |
| C  | 3.02176  | -0.86803 | -0.28814 |
| C  | 4.30050  | -0.99690 | -0.84366 |
| C  | 2.83873  | -0.17220 | 0.91629  |
| C  | 5.37981  | -0.41420 | -0.18998 |
| C  | 3.94579  | 0.39225  | 1.53527  |
| C  | 5.22457  | 0.28244  | 1.00082  |
| H  | 6.37018  | -0.50838 | -0.62621 |
| H  | 3.80390  | 0.93467  | 2.46578  |
| C  | -0.92460 | -2.66936 | -2.83615 |
| C  | -1.83675 | -3.32234 | -1.97740 |
| C  | -0.17214 | -3.43365 | -3.75170 |
| C  | -1.99291 | -4.70008 | -2.09284 |
| C  | -0.36814 | -4.80673 | -3.81733 |
| C  | -1.28440 | -5.46134 | -3.00838 |
| H  | -2.69381 | -5.19405 | -1.42685 |
| H  | 0.22629  | -5.38320 | -4.52008 |
| C  | 4.51431  | -1.72000 | -2.14010 |

|   |          |          |          |
|---|----------|----------|----------|
| H | 4.01945  | -2.69657 | -2.14505 |
| H | 4.10592  | -1.15034 | -2.98043 |
| H | 5.57671  | -1.87997 | -2.32929 |
| C | 1.47956  | -0.02207 | 1.53091  |
| H | 0.81895  | 0.57449  | 0.89569  |
| H | 0.99304  | -0.99206 | 1.67353  |
| H | 1.54443  | 0.46632  | 2.50399  |
| C | 6.40432  | 0.87630  | 1.70836  |
| H | 6.74564  | 0.22004  | 2.51513  |
| H | 7.24407  | 1.02436  | 1.02748  |
| H | 6.15442  | 1.83939  | 2.15833  |
| C | -1.50486 | -6.93747 | -3.12505 |
| H | -1.82832 | -7.36801 | -2.17581 |
| H | -2.28262 | -7.15391 | -3.86431 |
| H | -0.59746 | -7.45220 | -3.44637 |
| C | 0.86717  | -2.86069 | -4.67455 |
| H | 0.41490  | -2.41812 | -5.56550 |
| H | 1.47847  | -2.09709 | -4.19210 |
| H | 1.53563  | -3.65365 | -5.01227 |
| C | -2.64776 | -2.63783 | -0.91402 |
| H | -2.02208 | -2.05719 | -0.23538 |
| H | -3.35740 | -1.92830 | -1.33842 |
| H | -3.19053 | -3.38631 | -0.33474 |

**R = Mes\***

|    |          |          |          |
|----|----------|----------|----------|
| P  | 2.28599  | -1.92738 | -0.66353 |
| C  | 1.34620  | -1.04792 | -1.73311 |
| P  | -0.28626 | -1.58908 | -2.41086 |
| Cl | 1.60612  | 0.62133  | -2.12121 |
| O  | -1.33400 | -0.94877 | -1.57591 |
| C  | -0.38904 | -0.87627 | -4.07369 |
| H  | 0.48893  | -1.00495 | -4.70052 |
| H  | -1.25904 | -1.32113 | -4.55835 |
| H  | -0.57276 | 0.18728  | -3.92301 |
| C  | 3.52016  | -0.73516 | 0.02285  |
| C  | 4.80780  | -0.58965 | -0.55439 |
| C  | 3.17289  | 0.04292  | 1.16440  |
| C  | 5.63059  | 0.43181  | -0.08062 |
| C  | 4.04930  | 1.04577  | 1.55821  |
| C  | 5.26351  | 1.29094  | 0.93705  |
| H  | 6.60072  | 0.56205  | -0.52984 |
| H  | 3.77931  | 1.66448  | 2.40042  |
| C  | -0.65624 | -3.38640 | -2.67354 |
| C  | -1.74717 | -3.89236 | -1.90859 |
| C  | -0.37132 | -4.02855 | -3.91738 |
| C  | -2.67317 | -4.71744 | -2.54778 |
| C  | -1.33347 | -4.86222 | -4.46911 |
| C  | -2.54052 | -5.15286 | -3.85103 |
| H  | -3.54319 | -5.02113 | -1.98505 |
| H  | -1.12753 | -5.30902 | -5.43349 |
| C  | 5.38736  | -1.48801 | -1.67240 |
| C  | 1.91569  | -0.16341 | 2.04099  |
| C  | 6.14697  | 2.43978  | 1.41420  |
| C  | -3.60213 | -5.97375 | -4.57311 |
| C  | 0.96394  | -4.03007 | -4.69497 |
| C  | -2.00862 | -3.72293 | -0.39400 |
| C  | 4.70943  | -1.15653 | -3.00497 |
| H  | 3.64028  | -1.35094 | -2.98144 |
| H  | 4.85070  | -0.09942 | -3.24078 |
| H  | 5.14509  | -1.74119 | -3.81897 |
| C  | 6.88623  | -1.24899 | -1.88254 |
| H  | 7.09516  | -0.23961 | -2.24191 |
| H  | 7.46709  | -1.42385 | -0.97324 |
| H  | 7.25193  | -1.93106 | -2.65076 |
| C  | 5.21295  | -2.97052 | -1.27443 |
| H  | 5.66723  | -3.10644 | -0.28677 |

|   |          |          |          |
|---|----------|----------|----------|
| H | 4.14808  | -3.18858 | -1.13772 |
| C | 0.65257  | 0.38570  | 1.36787  |
| H | 0.77657  | 1.44607  | 1.13590  |
| H | 0.39003  | -0.12761 | 0.44617  |
| H | -0.19729 | 0.28770  | 2.04948  |
| C | 2.03298  | 0.56931  | 3.38512  |
| H | 2.93858  | 0.29263  | 3.93072  |
| H | 2.00714  | 1.65571  | 3.27516  |
| H | 1.17460  | 0.29397  | 4.00188  |
| C | 1.74707  | -1.64191 | 2.40764  |
| H | 1.56223  | -2.28794 | 1.54690  |
| H | 2.63630  | -2.01658 | 2.92131  |
| H | 0.88906  | -1.75980 | 3.07470  |
| C | 7.43617  | 2.55680  | 0.60543  |
| H | 8.02114  | 3.40361  | 0.97267  |
| H | 8.05844  | 1.66300  | 0.69779  |
| H | 7.23568  | 2.72847  | -0.45517 |
| C | 5.37453  | 3.75730  | 1.27759  |
| H | 5.10031  | 3.94259  | 0.23619  |
| H | 4.45648  | 3.75097  | 1.86843  |
| H | 5.98950  | 4.59324  | 1.62296  |
| C | 6.52152  | 2.22315  | 2.88522  |
| H | 7.15065  | 3.04474  | 3.23950  |
| H | 5.63855  | 2.17913  | 3.52586  |
| H | 7.07575  | 1.29005  | 3.01346  |
| C | -3.25979 | -2.87866 | -0.13263 |
| H | -4.13960 | -3.31077 | -0.61655 |
| H | -3.45806 | -2.84086 | 0.94285  |
| H | -3.11640 | -1.86418 | -0.50147 |
| C | -2.23351 | -5.13242 | 0.19444  |
| H | -2.32896 | -5.04642 | 1.27984  |
| H | -3.13860 | -5.61829 | -0.17016 |
| H | -1.38612 | -5.78926 | -0.01866 |
| C | -0.83268 | -3.15578 | 0.39033  |
| H | 0.08482  | -3.71168 | 0.18150  |
| H | -0.67522 | -2.10195 | 0.18242  |
| H | -1.04075 | -3.25299 | 1.45924  |
| C | 0.79552  | -3.55135 | -6.14166 |
| H | 1.75352  | -3.61907 | -6.66472 |
| H | 0.07702  | -4.15965 | -6.69351 |
| H | 0.45841  | -2.51548 | -6.19363 |
| C | 5.76464  | -4.01631 | -2.23215 |
| H | 5.49068  | -5.01510 | -1.88418 |
| H | 5.35958  | -3.90389 | -3.24041 |
| H | 6.85365  | -3.98917 | -2.30198 |
| C | 1.45201  | -5.49283 | -4.72466 |
| H | 2.42180  | -5.54233 | -5.22797 |
| H | 1.57470  | -5.87992 | -3.71043 |
| H | 0.76631  | -6.15372 | -5.25523 |
| C | 2.09092  | -3.25008 | -4.04172 |
| H | 2.25717  | -3.57786 | -3.01468 |
| H | 3.01304  | -3.42196 | -4.60243 |
| H | 1.92872  | -2.17525 | -4.02828 |
| C | -3.99725 | -5.24990 | -5.86579 |
| H | -3.14103 | -5.11186 | -6.52930 |
| H | -4.75114 | -5.82848 | -6.40702 |
| H | -4.41551 | -4.26401 | -5.64878 |
| C | -3.03810 | -7.35682 | -4.91932 |
| H | -2.16478 | -7.28784 | -5.57112 |
| H | -2.74137 | -7.89507 | -4.01586 |
| H | -3.79438 | -7.95254 | -5.43821 |
| C | -4.85871 | -6.16531 | -3.72817 |
| H | -4.65473 | -6.73231 | -2.81644 |
| H | -5.30628 | -5.20922 | -3.44570 |
| H | -5.60239 | -6.72379 | -4.30184 |

## R-P=C(Cl)-P(S)ClR

### R= H

|    |          |          |          |
|----|----------|----------|----------|
| P  | 0.78600  | -1.26507 | -0.12928 |
| C  | 0.59073  | -0.53053 | -1.62238 |
| P  | -0.99972 | -0.77462 | -2.45350 |
| Cl | 1.72803  | 0.37958  | -2.50890 |
| Cl | -1.87263 | 1.06120  | -2.30019 |
| S  | -0.96161 | -1.55533 | -4.18878 |
| H  | 2.13914  | -0.86803 | 0.06859  |
| H  | -1.70798 | -1.45674 | -1.44477 |

### R= Me

|    |          |          |          |
|----|----------|----------|----------|
| P  | 0.89882  | -1.24252 | -0.11834 |
| C  | 0.57027  | -0.53669 | -1.60142 |
| P  | -1.03159 | -0.79997 | -2.41045 |
| Cl | 1.65894  | 0.39830  | -2.53883 |
| Cl | -1.84078 | 1.08664  | -2.32588 |
| S  | -0.92491 | -1.55145 | -4.16566 |
| C  | -2.07525 | -1.68330 | -1.23663 |
| H  | -1.69574 | -2.69881 | -1.12077 |
| H  | -2.11629 | -1.17571 | -0.27336 |
| H  | -3.07028 | -1.72178 | -1.68248 |
| C  | 2.64323  | -0.78074 | 0.19477  |
| H  | 2.75132  | 0.30502  | 0.24548  |
| H  | 2.95503  | -1.21842 | 1.14364  |
| H  | 3.28936  | -1.15075 | -0.60444 |

### R = t-Bu

|    |          |          |          |
|----|----------|----------|----------|
| P  | 1.66990  | 0.09407  | -2.03934 |
| C  | 0.25258  | -0.11062 | -1.16484 |
| P  | -1.20006 | -0.57774 | -2.17125 |
| Cl | -0.01184 | 0.07542  | 0.53067  |
| S  | -0.72702 | -1.30178 | -3.88617 |
| C  | 3.04598  | 0.61564  | -0.87014 |
| C  | -2.39204 | 0.85455  | -2.25226 |
| C  | 4.25342  | 0.77278  | -1.80130 |
| H  | 4.07995  | 1.53618  | -2.56462 |
| H  | 5.12895  | 1.07262  | -1.21732 |
| H  | 4.49436  | -0.16259 | -2.31349 |
| C  | 3.35059  | -0.47460 | 0.15465  |
| H  | 4.24904  | -0.19708 | 0.71708  |
| H  | 2.53827  | -0.61496 | 0.86631  |
| H  | 3.55061  | -1.43377 | -0.33019 |
| C  | 2.75685  | 1.95845  | -0.20457 |
| H  | 2.53693  | 2.73210  | -0.94532 |
| H  | 1.92281  | 1.90463  | 0.49376  |
| H  | 3.64329  | 2.28157  | 0.35257  |
| C  | -1.71450 | 1.94540  | -3.08199 |
| H  | -2.41184 | 2.78105  | -3.19168 |
| H  | -0.81171 | 2.32368  | -2.59747 |
| H  | -1.44872 | 1.58359  | -4.07604 |
| C  | -2.77325 | 1.39921  | -0.87965 |
| H  | -3.19160 | 0.62703  | -0.23264 |
| H  | -1.92774 | 1.85948  | -0.36849 |
| H  | -3.53715 | 2.17009  | -1.01940 |
| C  | -3.64010 | 0.35191  | -2.97815 |
| H  | -4.32198 | 1.19603  | -3.11651 |
| H  | -3.39358 | -0.05917 | -3.95791 |
| H  | -4.16226 | -0.41313 | -2.40084 |
| Cl | -2.15981 | -1.92014 | -0.94819 |

### R = Ph

|    |          |          |          |
|----|----------|----------|----------|
| P  | 0.93403  | -1.11657 | -0.07923 |
| C  | 0.56811  | -0.43887 | -1.56960 |
| P  | -1.03963 | -0.70289 | -2.38310 |
| Cl | 1.57159  | 0.52824  | -2.57804 |
| S  | -0.94574 | -1.71286 | -4.00755 |
| C  | 2.68023  | -0.72975 | 0.21975  |
| C  | 3.00693  | -0.25000 | 1.48954  |
| C  | 3.70604  | -1.00667 | -0.68583 |
| C  | 4.32749  | -0.00498 | 1.83163  |
| H  | 2.22029  | -0.06370 | 2.21427  |
| C  | 5.02586  | -0.78175 | -0.33291 |
| H  | 3.47209  | -1.40653 | -1.66500 |
| C  | 5.33832  | -0.27180 | 0.92042  |
| H  | 4.56749  | 0.38322  | 2.81479  |
| H  | 5.81613  | -1.00486 | -1.04063 |
| H  | 6.37289  | -0.09250 | 1.18994  |
| C  | -1.78602 | 0.93771  | -2.50415 |
| C  | -2.28049 | 1.36657  | -3.72943 |
| C  | -1.86101 | 1.76729  | -1.38730 |
| C  | -2.85498 | 2.62446  | -3.83661 |
| H  | -2.20829 | 0.70806  | -4.58763 |
| C  | -2.43171 | 3.02260  | -1.50164 |
| H  | -1.47521 | 1.43025  | -0.43150 |
| C  | -2.92979 | 3.45076  | -2.72600 |
| H  | -3.24237 | 2.95892  | -4.79193 |
| H  | -2.49017 | 3.66937  | -0.63394 |
| H  | -3.37730 | 4.43448  | -2.81220 |
| Cl | -2.13927 | -1.58699 | -0.90122 |

### R = Mes

|    |          |          |          |
|----|----------|----------|----------|
| P  | 1.76949  | -0.04887 | -2.16118 |
| C  | 0.35569  | 0.29532  | -1.32760 |
| P  | -1.19456 | -0.36989 | -2.01081 |
| Cl | 0.21438  | 1.09254  | 0.19099  |
| S  | -0.99357 | -1.22131 | -3.71869 |
| C  | 3.07178  | 0.58089  | -1.05245 |
| C  | 3.72258  | 1.77687  | -1.38073 |
| C  | 3.51343  | -0.19234 | 0.03226  |
| C  | 4.79067  | 2.19844  | -0.59794 |
| C  | 4.58632  | 0.26660  | 0.78401  |
| C  | 5.23455  | 1.46154  | 0.49167  |
| H  | 5.29297  | 3.12722  | -0.85290 |
| H  | 4.93184  | -0.33369 | 1.62091  |
| C  | -2.52143 | 0.86974  | -1.91224 |
| C  | -3.85556 | 0.47573  | -1.68753 |
| C  | -2.23314 | 2.22141  | -2.19227 |
| C  | -4.83323 | 1.45974  | -1.59873 |
| C  | -3.25419 | 3.15713  | -2.08868 |
| C  | -4.55413 | 2.80768  | -1.75657 |
| H  | -5.85835 | 1.14794  | -1.42231 |
| H  | -3.02223 | 4.19617  | -2.30221 |
| C  | 3.27218  | 2.61168  | -2.54238 |
| H  | 3.10332  | 2.00330  | -3.43712 |
| H  | 2.33001  | 3.12244  | -2.32250 |
| H  | 4.01360  | 3.37283  | -2.78936 |
| C  | 2.85645  | -1.49314 | 0.38417  |
| H  | 1.83290  | -1.33960 | 0.73737  |
| H  | 2.79873  | -2.16330 | -0.47902 |
| H  | 3.41023  | -2.00739 | 1.17059  |
| C  | 6.37167  | 1.94398  | 1.33943  |

|    |          |          |          |
|----|----------|----------|----------|
| H  | 6.00004  | 2.45341  | 2.23411  |
| H  | 6.99752  | 1.11471  | 1.67543  |
| H  | 7.00155  | 2.65082  | 0.79689  |
| C  | -4.32517 | -0.94893 | -1.60581 |
| H  | -5.36817 | -0.99717 | -1.92274 |
| H  | -3.74881 | -1.61415 | -2.24912 |
| H  | -4.26776 | -1.34034 | -0.58837 |
| C  | -5.62169 | 3.84548  | -1.60453 |
| H  | -5.66180 | 4.20686  | -0.57207 |
| H  | -5.43304 | 4.70899  | -2.24495 |
| H  | -6.60661 | 3.44343  | -1.84817 |
| C  | -0.90108 | 2.71868  | -2.67473 |
| H  | -0.18810 | 2.84305  | -1.85736 |
| H  | -0.45782 | 2.04558  | -3.41011 |
| H  | -1.03034 | 3.69236  | -3.14910 |
| Cl | -1.55506 | -1.68003 | -0.45398 |

**R = Mes\***

|    |          |          |          |
|----|----------|----------|----------|
| P  | 2.26179  | -1.89753 | -0.67438 |
| C  | 1.32041  | -0.98120 | -1.71769 |
| P  | -0.24491 | -1.57246 | -2.48747 |
| Cl | 1.56203  | 0.69359  | -2.03773 |
| C  | 3.49195  | -0.71162 | 0.02426  |
| C  | 4.75141  | -0.52617 | -0.59800 |
| C  | 3.17556  | 0.02706  | 1.19932  |
| C  | 5.57088  | 0.50222  | -0.13403 |
| C  | 4.04983  | 1.03264  | 1.58937  |
| C  | 5.23059  | 1.32349  | 0.92331  |
| H  | 6.51656  | 0.66512  | -0.62415 |
| H  | 3.80450  | 1.61862  | 2.46214  |
| C  | -0.65627 | -3.36996 | -2.67472 |
| C  | -1.77638 | -3.83255 | -1.92156 |
| C  | -0.33893 | -4.06923 | -3.88147 |
| C  | -2.72001 | -4.61864 | -2.57735 |
| C  | -1.33352 | -4.84472 | -4.45849 |
| C  | -2.57889 | -5.05044 | -3.88282 |
| H  | -3.60435 | -4.90239 | -2.02516 |
| H  | -1.11474 | -5.32348 | -5.40438 |
| C  | 5.30462  | -1.38064 | -1.75816 |
| C  | 1.94968  | -0.22310 | 2.10475  |
| C  | 6.10916  | 2.47794  | 1.39522  |
| C  | -3.66884 | -5.79699 | -4.64021 |
| C  | 1.05036  | -4.24375 | -4.53598 |
| C  | -1.99787 | -3.73601 | -0.39481 |
| C  | 4.65319  | -0.96949 | -3.08178 |
| H  | 3.57421  | -1.10330 | -3.06992 |
| H  | 4.85538  | 0.08275  | -3.29418 |
| H  | 5.06035  | -1.56767 | -3.90230 |
| C  | 6.81753  | -1.19709 | -1.93913 |
| H  | 7.08114  | -0.19937 | -2.29568 |
| H  | 7.36978  | -1.39628 | -1.01752 |
| H  | 7.16379  | -1.90491 | -2.69579 |
| C  | 5.11089  | -2.87658 | -1.49213 |
| H  | 5.58692  | -3.16826 | -0.55264 |
| H  | 4.06292  | -3.18079 | -1.44039 |
| C  | 0.66675  | 0.33077  | 1.47621  |
| H  | 0.76389  | 1.40354  | 1.29504  |
| H  | 0.41229  | -0.14024 | 0.52941  |
| H  | -0.17454 | 0.17800  | 2.15840  |
| C  | 2.09341  | 0.46926  | 3.46681  |
| H  | 3.01533  | 0.18521  | 3.98023  |
| H  | 2.05546  | 1.55802  | 3.39016  |
| H  | 1.25384  | 0.16728  | 4.09697  |
| C  | 1.80761  | -1.71451 | 2.42567  |

|    |          |          |          |
|----|----------|----------|----------|
| H  | 1.60974  | -2.33351 | 1.54782  |
| H  | 2.71388  | -2.09540 | 2.90346  |
| H  | 0.96834  | -1.86631 | 3.10954  |
| C  | 7.35624  | 2.64944  | 0.53201  |
| H  | 7.93832  | 3.49889  | 0.89757  |
| H  | 8.00231  | 1.76860  | 0.56847  |
| H  | 7.10255  | 2.84756  | -0.51244 |
| C  | 5.30206  | 3.78031  | 1.33509  |
| H  | 4.97492  | 3.99012  | 0.31386  |
| H  | 4.41341  | 3.73547  | 1.96776  |
| H  | 5.91430  | 4.61961  | 1.67690  |
| C  | 6.55599  | 2.22546  | 2.84009  |
| H  | 7.18206  | 3.05079  | 3.19089  |
| H  | 5.70484  | 2.14103  | 3.51868  |
| H  | 7.13661  | 1.30254  | 2.91362  |
| C  | -3.33573 | -3.09045 | -0.02493 |
| H  | -4.18161 | -3.60530 | -0.48487 |
| H  | -3.47239 | -3.13724 | 1.05920  |
| H  | -3.36177 | -2.04605 | -0.33310 |
| C  | -2.00593 | -5.19678 | 0.10865  |
| H  | -2.10168 | -5.19659 | 1.19787  |
| H  | -2.83223 | -5.77974 | -0.29855 |
| H  | -1.07354 | -5.70498 | -0.14997 |
| C  | -0.87923 | -3.05715 | 0.37996  |
| H  | 0.08900  | -3.49998 | 0.13720  |
| H  | -0.83765 | -1.98501 | 0.20429  |
| H  | -1.05066 | -3.20644 | 1.44928  |
| C  | 1.06299  | -3.90588 | -6.02978 |
| H  | 2.04983  | -4.13365 | -6.44214 |
| H  | 0.33284  | -4.48960 | -6.59294 |
| H  | 0.85910  | -2.85015 | -6.20354 |
| C  | 1.38490  | -5.74284 | -4.37740 |
| H  | 2.38418  | -5.93299 | -4.77912 |
| H  | 1.38051  | -6.03352 | -3.32405 |
| H  | 0.68103  | -6.38583 | -4.90660 |
| C  | 2.18447  | -3.50313 | -3.84943 |
| H  | 2.20786  | -3.72666 | -2.78169 |
| H  | 3.13456  | -3.83250 | -4.27779 |
| H  | 2.12881  | -2.42670 | -3.98236 |
| C  | -3.96434 | -5.04572 | -5.94400 |
| H  | -3.07768 | -4.97169 | -6.57681 |
| H  | -4.74003 | -5.56770 | -6.51119 |
| H  | -4.31424 | -4.03118 | -5.73949 |
| C  | -3.19261 | -7.21688 | -4.96907 |
| H  | -2.29623 | -7.21092 | -5.59247 |
| H  | -2.96496 | -7.77459 | -4.05730 |
| H  | -3.97230 | -7.75725 | -5.51311 |
| C  | -4.96399 | -5.89643 | -3.83883 |
| H  | -4.83540 | -6.48229 | -2.92510 |
| H  | -5.34627 | -4.91004 | -3.56507 |
| H  | -5.72797 | -6.39411 | -4.44090 |
| S  | -1.71338 | -0.52286 | -1.80963 |
| Cl | 0.06026  | -1.01216 | -4.45148 |
| H  | 5.56332  | -3.45657 | -2.30098 |

**R-P=C(Cl)-P(S)MeR**

**R = H**

|    |          |          |          |
|----|----------|----------|----------|
| P  | 0.87571  | -1.32772 | -0.15207 |
| C  | 0.59633  | -0.54944 | -1.60738 |
| P  | -1.02898 | -0.75259 | -2.40692 |
| Cl | 1.69880  | 0.41073  | -2.49963 |
| S  | -1.01799 | -1.61877 | -4.12601 |
| H  | 2.22574  | -0.90207 | 0.01264  |
| H  | -1.68637 | -1.44085 | -1.35989 |
| C  | -1.77057 | 0.89445  | -2.34944 |

|   |          |         |          |
|---|----------|---------|----------|
| H | -2.79361 | 0.81644 | -2.72026 |
| H | -1.76586 | 1.28886 | -1.33165 |
| H | -1.20547 | 1.55231 | -3.01082 |

**R = Me**

|    |          |          |          |
|----|----------|----------|----------|
| P  | 1.79954  | -0.04881 | -2.25999 |
| C  | 0.32837  | -0.02642 | -1.46268 |
| P  | -1.16270 | -0.55293 | -2.35997 |
| Cl | 0.07225  | 0.46239  | 0.18104  |
| S  | -0.80053 | -1.08398 | -4.18484 |
| C  | -1.87315 | -1.85777 | -1.32423 |
| H  | -1.20168 | -2.71636 | -1.34562 |
| H  | -2.01845 | -1.52175 | -0.29644 |
| H  | -2.82998 | -2.14905 | -1.76059 |
| C  | 2.95519  | 0.55348  | -0.96253 |
| H  | 2.94527  | -0.10660 | -0.09178 |
| H  | 3.96257  | 0.57944  | -1.37957 |
| H  | 2.68042  | 1.55680  | -0.62806 |
| C  | -2.30277 | 0.84470  | -2.19580 |
| H  | -1.90130 | 1.68350  | -2.76479 |
| H  | -3.25924 | 0.55059  | -2.63103 |
| H  | -2.44004 | 1.13184  | -1.15220 |

**R = t-Bu**

|    |          |          |          |
|----|----------|----------|----------|
| P  | 1.64394  | 0.11191  | -2.04027 |
| C  | 0.23583  | -0.16025 | -1.17522 |
| P  | -1.23578 | -0.64574 | -2.15690 |
| Cl | -0.01888 | -0.07247 | 0.54108  |
| S  | -0.75930 | -1.35704 | -3.90088 |
| C  | -2.08683 | -1.86172 | -1.11412 |
| H  | -1.38658 | -2.67392 | -0.91568 |
| H  | -2.44111 | -1.44666 | -0.17112 |
| H  | -2.92133 | -2.25918 | -1.69182 |
| C  | 3.01177  | 0.62982  | -0.85701 |
| C  | -2.35359 | 0.84996  | -2.26482 |
| C  | 4.20737  | 0.87028  | -1.78528 |
| H  | 4.00209  | 1.65975  | -2.51340 |
| H  | 5.07619  | 1.17477  | -1.19342 |
| H  | 4.47661  | -0.03247 | -2.34014 |
| C  | 3.36225  | -0.49220 | 0.11749  |
| H  | 4.25465  | -0.20924 | 0.68710  |
| H  | 2.55997  | -0.69138 | 0.82676  |
| H  | 3.59132  | -1.42170 | -0.41051 |
| C  | 2.68242  | 1.93060  | -0.12977 |
| H  | 2.42823  | 2.72759  | -0.83385 |
| H  | 1.85656  | 1.81649  | 0.57119  |
| H  | 3.56133  | 2.26089  | 0.43541  |
| C  | -1.68491 | 1.87267  | -3.17876 |
| H  | -2.35343 | 2.73022  | -3.30102 |
| H  | -0.74446 | 2.23625  | -2.75850 |
| H  | -1.47793 | 1.44720  | -4.16162 |
| C  | -2.64081 | 1.48098  | -0.90536 |
| H  | -3.08393 | 0.77597  | -0.19892 |
| H  | -1.74470 | 1.90400  | -0.45040 |
| H  | -3.35782 | 2.29614  | -1.04542 |
| C  | -3.66148 | 0.37537  | -2.90145 |
| H  | -4.29622 | 1.24574  | -3.09313 |
| H  | -3.47906 | -0.13348 | -3.84969 |
| H  | -4.21701 | -0.29744 | -2.24390 |

**R = Ph**

|    |          |          |          |
|----|----------|----------|----------|
| P  | 1.70938  | -0.11496 | -1.98689 |
| C  | 0.20792  | -0.05643 | -1.24135 |
| P  | -1.23229 | -0.56660 | -2.24145 |
| Cl | -0.15977 | 0.39921  | 0.38394  |

|   |          |          |          |
|---|----------|----------|----------|
| S | -0.72973 | -1.15194 | -4.01797 |
| C | -2.03658 | -1.84616 | -1.24591 |
| H | -1.38587 | -2.72106 | -1.25924 |
| H | -2.20478 | -1.53100 | -0.21614 |
| H | -2.98417 | -2.09853 | -1.72339 |
| C | 2.87885  | 0.50385  | -0.73860 |
| C | 2.75187  | 1.73080  | -0.08499 |
| C | 4.03655  | -0.25048 | -0.53890 |
| C | 3.74925  | 2.17616  | 0.76644  |
| H | 1.87316  | 2.34330  | -0.24822 |
| C | 5.02257  | 0.18571  | 0.33235  |
| H | 4.16451  | -1.18976 | -1.06837 |
| C | 4.88050  | 1.40110  | 0.98494  |
| H | 3.64289  | 3.13343  | 1.26426  |
| H | 5.90835  | -0.41861 | 0.49133  |
| H | 5.65632  | 1.75092  | 1.65647  |
| C | -2.34599 | 0.87022  | -2.21683 |
| C | -3.18405 | 1.15006  | -1.13896 |
| C | -2.34930 | 1.71415  | -3.32429 |
| C | -4.01225 | 2.26146  | -1.17118 |
| H | -3.19813 | 0.50545  | -0.26904 |
| C | -3.17268 | 2.82816  | -3.34944 |
| H | -1.71333 | 1.47269  | -4.16900 |
| C | -4.00508 | 3.10287  | -2.27390 |
| H | -4.66595 | 2.46905  | -0.33174 |
| H | -3.17032 | 3.47884  | -4.21640 |
| H | -4.65431 | 3.97087  | -2.29718 |

**R = Mes**

|    |          |          |          |
|----|----------|----------|----------|
| P  | 1.78406  | -0.02386 | -2.22482 |
| C  | 0.33483  | 0.24235  | -1.42852 |
| P  | -1.19456 | -0.45367 | -2.16205 |
| Cl | 0.12291  | 0.96375  | 0.12661  |
| S  | -0.93779 | -1.10473 | -3.97276 |
| C  | -1.43977 | -1.80027 | -0.96178 |
| H  | -0.48422 | -2.32641 | -0.93591 |
| H  | -1.67741 | -1.42593 | 0.03457  |
| H  | -2.20401 | -2.48868 | -1.31017 |
| C  | 3.03932  | 0.60348  | -1.05527 |
| C  | 3.65470  | 1.83458  | -1.31651 |
| C  | 3.49111  | -0.19824 | 0.00426  |
| C  | 4.69283  | 2.25839  | -0.49482 |
| C  | 4.53269  | 0.26318  | 0.79738  |
| C  | 5.14337  | 1.49150  | 0.57057  |
| H  | 5.16661  | 3.21408  | -0.70044 |
| H  | 4.88383  | -0.36127 | 1.61414  |
| C  | -2.49724 | 0.81797  | -1.98384 |
| C  | -3.80847 | 0.49370  | -1.58290 |
| C  | -2.20729 | 2.14479  | -2.36207 |
| C  | -4.74697 | 1.51160  | -1.45646 |
| C  | -3.18516 | 3.12073  | -2.21607 |
| C  | -4.45371 | 2.83675  | -1.73654 |
| H  | -5.75373 | 1.24718  | -1.14709 |
| H  | -2.94397 | 4.13815  | -2.50932 |
| C  | 3.20077  | 2.70636  | -2.44920 |
| H  | 3.03826  | 2.12997  | -3.36566 |
| H  | 2.25395  | 3.20100  | -2.21339 |
| H  | 3.93617  | 3.48274  | -2.66514 |
| C  | 2.87560  | -1.53503 | 0.29147  |
| H  | 1.85011  | -1.42606 | 0.65606  |
| H  | 2.83536  | -2.16214 | -0.60436 |
| H  | 3.44652  | -2.07076 | 1.05099  |
| C  | 6.24736  | 1.97552  | 1.46036  |
| H  | 5.84269  | 2.42720  | 2.37160  |
| H  | 6.89976  | 1.15550  | 1.76759  |
| H  | 6.85794  | 2.73078  | 0.96284  |

|   |          |          |          |
|---|----------|----------|----------|
| C | -4.30423 | -0.90509 | -1.34666 |
| H | -5.39438 | -0.90481 | -1.32808 |
| H | -3.99088 | -1.58259 | -2.14328 |
| H | -3.96474 | -1.31772 | -0.39470 |
| C | -5.47383 | 3.91578  | -1.54767 |
| H | -5.39838 | 4.34654  | -0.54417 |
| H | -5.33140 | 4.72834  | -2.26245 |
| H | -6.48850 | 3.53022  | -1.66205 |
| C | -0.90223 | 2.57326  | -2.96549 |
| H | -0.14139 | 2.74190  | -2.19997 |
| H | -0.51604 | 1.83207  | -3.66698 |
| H | -1.04048 | 3.51166  | -3.50451 |

**R = Mes\***

|    |          |          |          |
|----|----------|----------|----------|
| P  | 2.23839  | -1.88922 | -0.63350 |
| C  | 1.30880  | -0.99707 | -1.70518 |
| P  | -0.27719 | -1.55167 | -2.48423 |
| Cl | 1.59565  | 0.66834  | -2.08110 |
| C  | -0.16301 | -0.96072 | -4.20032 |
| H  | 0.74349  | -1.24108 | -4.72854 |
| H  | -1.03945 | -1.34780 | -4.72047 |
| H  | -0.23690 | 0.12372  | -4.14411 |
| C  | 3.48182  | -0.70364 | 0.04580  |
| C  | 4.75450  | -0.55371 | -0.55853 |
| C  | 3.15951  | 0.07019  | 1.19699  |
| C  | 5.58212  | 0.47546  | -0.11071 |
| C  | 4.04123  | 1.07557  | 1.57128  |
| C  | 5.23600  | 1.33199  | 0.91621  |
| H  | 6.53818  | 0.61069  | -0.58903 |
| H  | 3.79087  | 1.68923  | 2.42335  |
| C  | -0.67029 | -3.36666 | -2.66922 |
| C  | -1.75956 | -3.87979 | -1.90824 |
| C  | -0.37769 | -4.02125 | -3.90684 |
| C  | -2.70179 | -4.67193 | -2.56267 |
| C  | -1.36816 | -4.79990 | -4.48829 |
| C  | -2.58986 | -5.06004 | -3.88383 |
| H  | -3.56450 | -4.99106 | -1.99577 |
| H  | -1.16432 | -5.24179 | -5.45571 |
| C  | 5.31379  | -1.44690 | -1.68640 |
| C  | 1.92209  | -0.14380 | 2.09728  |
| C  | 6.12256  | 2.48792  | 1.36940  |
| C  | -3.68147 | -5.81410 | -4.63226 |
| C  | 0.99878  | -4.13684 | -4.60152 |
| C  | -1.95629 | -3.81997 | -0.37687 |
| C  | 4.69202  | -1.05457 | -3.02943 |
| H  | 3.61016  | -1.16342 | -3.02446 |
| H  | 4.92104  | -0.01257 | -3.26431 |
| H  | 5.09592  | -1.68230 | -3.82946 |
| C  | 6.83274  | -1.29462 | -1.84469 |
| H  | 7.12119  | -0.31085 | -2.22031 |
| H  | 7.36444  | -1.48050 | -0.90840 |
| H  | 7.17985  | -2.02719 | -2.57715 |
| C  | 5.08773  | -2.93298 | -1.39169 |
| H  | 5.54055  | -3.21186 | -0.43698 |
| H  | 4.03346  | -3.21605 | -1.35241 |
| C  | 0.64672  | 0.39847  | 1.44398  |
| H  | 0.75616  | 1.46175  | 1.21853  |
| H  | 0.38171  | -0.10902 | 0.51918  |
| H  | -0.19605 | 0.28495  | 2.13199  |
| C  | 2.05986  | 0.58762  | 3.43961  |
| H  | 2.97540  | 0.31294  | 3.96947  |
| H  | 2.02955  | 1.67396  | 3.33065  |
| H  | 1.21289  | 0.30970  | 4.07086  |
| C  | 1.76646  | -1.62424 | 2.46149  |
| H  | 1.57015  | -2.26680 | 1.60067  |
| H  | 2.66582  | -1.99747 | 2.95824  |

|   |          |          |          |
|---|----------|----------|----------|
| H | 0.92056  | -1.74836 | 3.14281  |
| C | 7.38430  | 2.61989  | 0.52065  |
| H | 7.97163  | 3.47224  | 0.87087  |
| H | 8.01859  | 1.73261  | 0.59153  |
| H | 7.14834  | 2.79121  | -0.53269 |
| C | 5.33362  | 3.79832  | 1.26173  |
| H | 5.02469  | 3.98430  | 0.23023  |
| H | 4.43491  | 3.78165  | 1.88137  |
| H | 5.95138  | 4.63895  | 1.59025  |
| C | 6.54496  | 2.27000  | 2.82720  |
| H | 7.17657  | 3.09669  | 3.16478  |
| H | 5.68279  | 2.21490  | 3.49477  |
| H | 7.11221  | 1.34211  | 2.93468  |
| C | -3.29958 | -3.20490 | 0.02568  |
| H | -4.14339 | -3.73078 | -0.42613 |
| H | -3.41559 | -3.26920 | 1.11143  |
| H | -3.34789 | -2.15723 | -0.26818 |
| C | -1.93003 | -5.28892 | 0.09981  |
| H | -2.00344 | -5.30891 | 1.19063  |
| H | -2.75491 | -5.87953 | -0.29985 |
| H | -0.99461 | -5.77686 | -0.18596 |
| C | -0.83647 | -3.13320 | 0.38840  |
| H | 0.13292  | -3.56777 | 0.13605  |
| H | -0.80963 | -2.06043 | 0.20975  |
| H | -0.99689 | -3.28445 | 1.45934  |
| C | 0.97105  | -3.71230 | -6.07368 |
| H | 1.95404  | -3.88320 | -6.52112 |
| H | 0.24592  | -4.28879 | -6.65066 |
| H | 0.72638  | -2.65748 | -6.19909 |
| C | 1.36520  | -5.63575 | -4.54903 |
| H | 2.36054  | -5.78087 | -4.97863 |
| H | 1.38389  | -5.99376 | -3.51709 |
| H | 0.66415  | -6.25639 | -5.10740 |
| C | 2.13809  | -3.43094 | -3.88539 |
| H | 2.19098  | -3.73691 | -2.83944 |
| H | 3.08300  | -3.70319 | -4.36214 |
| H | 2.07359  | -2.34730 | -3.91186 |
| C | -4.04629 | -5.02734 | -5.89687 |
| H | -3.18410 | -4.89949 | -6.55474 |
| H | -4.82235 | -5.55478 | -6.45861 |
| H | -4.42432 | -4.03415 | -5.64288 |
| C | -3.17367 | -7.20516 | -5.02957 |
| H | -2.30092 | -7.14809 | -5.68327 |
| H | -2.89561 | -7.78671 | -4.14720 |
| H | -3.95493 | -7.75152 | -5.56541 |
| C | -4.94443 | -5.98490 | -3.79237 |
| H | -4.76468 | -6.59633 | -2.90449 |
| H | -5.34937 | -5.02220 | -3.47103 |
| H | -5.71196 | -6.48771 | -4.38573 |
| S | -1.73993 | -0.54169 | -1.67052 |
| H | 5.54610  | -3.53857 | -2.17830 |

## PCPX-E(II) model systems

**E = Si(II)**

**R-P=C(Si(II)Cl)-P(O)ClR**

**R= H**

|    |          |          |          |
|----|----------|----------|----------|
| P  | 0.78783  | 0.09855  | 1.08065  |
| C  | 0.44291  | -0.29030 | -0.49355 |
| P  | -1.05815 | -0.29005 | -1.34871 |
| Cl | 1.12156  | -2.66830 | -2.35917 |
| Si | 1.30782  | -0.53452 | -2.28854 |

|    |          |          |          |
|----|----------|----------|----------|
| O  | -0.50531 | -0.12690 | -2.76929 |
| H  | 2.19863  | -0.13316 | 1.01997  |
| H  | -1.77588 | -1.48710 | -1.19906 |
| Cl | -2.46836 | 1.07178  | -0.92807 |

**R = Me**

|    |          |          |          |
|----|----------|----------|----------|
| P  | 0.84161  | 0.22802  | 1.00849  |
| C  | 0.43296  | -0.21088 | -0.53535 |
| P  | -1.10101 | -0.29269 | -1.32158 |
| Cl | 1.28893  | -2.60619 | -2.35371 |
| Si | 1.23951  | -0.45169 | -2.34237 |
| O  | -0.58989 | -0.23174 | -2.77471 |
| C  | 2.65918  | -0.02706 | 1.02877  |
| H  | 3.10761  | 0.21259  | 0.06173  |
| H  | 3.11018  | 0.58194  | 1.81364  |
| H  | 2.86536  | -1.07820 | 1.25175  |
| C  | -2.03599 | -1.77900 | -1.00372 |
| H  | -2.37954 | -1.78431 | 0.03145  |
| H  | -2.88908 | -1.81816 | -1.68294 |
| H  | -1.36665 | -2.62175 | -1.18972 |
| Cl | -2.41578 | 1.20370  | -0.98560 |

**R = t-Bu**

|    |          |          |          |
|----|----------|----------|----------|
| P  | 0.65866  | 0.19207  | 0.61811  |
| C  | 0.47677  | -0.29956 | -0.95859 |
| P  | -1.04320 | -0.56188 | -1.76551 |
| Cl | 1.94838  | -2.58920 | -2.57951 |
| Si | 1.34042  | -0.53514 | -2.74561 |
| O  | -0.48171 | -0.80713 | -3.18094 |
| C  | -2.13384 | -1.92414 | -1.20940 |
| C  | -2.71573 | -1.58655 | 0.16051  |
| H  | -3.37569 | -0.71882 | 0.12239  |
| H  | -3.30028 | -2.44260 | 0.50848  |
| H  | -1.93371 | -1.39522 | 0.89975  |
| C  | -3.23673 | -2.10543 | -2.25280 |
| H  | -2.82269 | -2.30575 | -3.24274 |
| H  | -3.84855 | -2.96361 | -1.96121 |
| H  | -3.88810 | -1.23241 | -2.31564 |
| C  | -1.27337 | -3.18685 | -1.12834 |
| H  | -0.82330 | -3.43800 | -2.08918 |
| H  | -0.47053 | -3.08852 | -0.39618 |
| H  | -1.91713 | -4.01588 | -0.82144 |
| C  | 2.49338  | 0.16202  | 0.98166  |
| C  | 2.92710  | -1.30084 | 1.08784  |
| H  | 2.33903  | -1.84540 | 1.83278  |
| H  | 2.83178  | -1.81856 | 0.13194  |
| H  | 3.97583  | -1.34571 | 1.40218  |
| C  | 3.30178  | 0.89170  | -0.08226 |
| H  | 4.36046  | 0.89067  | 0.19934  |
| H  | 3.22383  | 0.41638  | -1.06286 |
| H  | 2.98640  | 1.93266  | -0.18917 |
| C  | 2.66378  | 0.85480  | 2.33431  |
| H  | 3.71565  | 0.82740  | 2.63447  |
| H  | 2.35439  | 1.90277  | 2.29424  |
| H  | 2.07923  | 0.36310  | 3.11686  |
| Cl | -2.24052 | 1.07366  | -1.80758 |

**R = Ph**

|    |          |          |          |
|----|----------|----------|----------|
| P  | 0.97589  | -0.65819 | 1.28578  |
| C  | 0.32104  | -0.36603 | -0.21523 |
| P  | -1.35280 | -0.29961 | -0.63551 |
| Cl | 0.96406  | -1.14946 | -3.23488 |
| Si | 0.67927  | 0.55101  | -1.94245 |
| O  | -1.21782 | 0.53227  | -1.92467 |
| Cl | -2.55539 | 0.64120  | 0.69061  |

|   |          |          |          |
|---|----------|----------|----------|
| C | -2.16668 | -1.85843 | -0.94652 |
| C | -2.38816 | -2.24611 | -2.26454 |
| C | -2.53407 | -2.69005 | 0.10990  |
| C | -2.98819 | -3.46969 | -2.52092 |
| H | -2.08582 | -1.59635 | -3.07603 |
| C | -3.12743 | -3.91023 | -0.15735 |
| H | -2.36036 | -2.38421 | 1.13582  |
| C | -3.35560 | -4.29823 | -1.47218 |
| H | -3.16452 | -3.77546 | -3.54533 |
| H | -3.41524 | -4.56027 | 0.66039  |
| H | -3.82271 | -5.25464 | -1.67776 |
| C | 2.75904  | -0.63489 | 1.03086  |
| C | 3.39458  | -0.80391 | -0.20342 |
| C | 3.53857  | -0.43639 | 2.17581  |
| C | 4.77472  | -0.74652 | -0.28809 |
| H | 2.80958  | -1.01498 | -1.09131 |
| C | 4.91864  | -0.37330 | 2.08619  |
| H | 3.05191  | -0.32059 | 3.13959  |
| C | 5.53656  | -0.52557 | 0.85262  |
| H | 5.25977  | -0.88040 | -1.24811 |
| H | 5.51344  | -0.20909 | 2.97730  |
| H | 6.61747  | -0.48222 | 0.78023  |

**R = Mes**

|   |          |          |          |
|---|----------|----------|----------|
| P | 0.84879  | 0.09481  | 1.01712  |
| C | 0.42254  | -0.50327 | -0.47320 |
| P | -1.10997 | -0.48680 | -1.30743 |
| C | 2.68895  | 0.07342  | 0.92447  |
| C | 3.42579  | -1.11295 | 1.16878  |
| C | 3.35896  | 1.24737  | 0.50338  |
| C | 4.75567  | -1.14200 | 0.77071  |
| C | 4.69578  | 1.13166  | 0.12537  |
| C | 5.40022  | -0.05731 | 0.19328  |
| H | 5.32010  | -2.05121 | 0.91950  |
| H | 5.20507  | 2.00839  | -0.24017 |
| C | 2.72915  | 2.65928  | 0.50145  |
| C | 2.87109  | -2.34448 | 1.91518  |
| C | 6.84125  | -0.19527 | -0.28830 |
| C | 2.05294  | -3.25734 | 0.99648  |
| H | 1.16740  | -2.76707 | 0.59696  |
| H | 2.64976  | -3.58675 | 0.14402  |
| H | 1.73279  | -4.14473 | 1.55140  |
| C | 2.02815  | -1.90801 | 3.11647  |
| H | 2.60541  | -1.27244 | 3.79264  |
| H | 1.12599  | -1.35536 | 2.83467  |
| H | 1.69021  | -2.78724 | 3.67183  |
| C | 4.00499  | -3.20074 | 2.49456  |
| H | 4.57814  | -3.71386 | 1.71977  |
| H | 4.69330  | -2.61146 | 3.10533  |
| H | 3.56875  | -3.97515 | 3.12990  |
| C | 1.69321  | 2.85172  | -0.61296 |
| H | 0.77836  | 2.28522  | -0.44081 |
| H | 1.41218  | 3.90726  | -0.67062 |
| H | 2.09687  | 2.55076  | -1.58205 |
| C | 2.09029  | 2.94563  | 1.86660  |
| H | 1.26216  | 2.27164  | 2.09925  |
| H | 2.82880  | 2.85840  | 2.66729  |
| H | 1.68803  | 3.96245  | 1.88036  |
| C | 3.78830  | 3.74834  | 0.29473  |
| H | 4.59548  | 3.68394  | 1.02806  |
| H | 4.22284  | 3.72107  | -0.70712 |
| H | 3.30998  | 4.72346  | 0.41115  |
| C | 7.37345  | 1.09543  | -0.90543 |
| H | 7.39953  | 1.91425  | -0.18176 |
| H | 8.39564  | 0.93596  | -1.25724 |
| H | 6.77386  | 1.41170  | -1.76259 |



|                 |          |          |          |   |          |          |          |
|-----------------|----------|----------|----------|---|----------|----------|----------|
| C               | 6.90711  | -1.29743 | -1.35249 | C | 3.60928  | -0.48247 | 1.40161  |
| H               | 6.57914  | -2.26100 | -0.95755 | C | 3.63562  | 1.37999  | -0.18734 |
| H               | 6.27085  | -1.05392 | -2.20655 | C | 4.77666  | -0.95184 | 0.81009  |
| H               | 7.93364  | -1.41405 | -1.71152 | C | 4.79475  | 0.83710  | -0.73365 |
| C               | 7.74612  | -0.57294 | 0.89033  | C | 5.35392  | -0.35269 | -0.30040 |
| H               | 7.44458  | -1.51784 | 1.34683  | H | 5.24784  | -1.82970 | 1.22160  |
| H               | 8.78047  | -0.68139 | 0.55178  | H | 5.28413  | 1.37846  | -1.53395 |
| H               | 7.72056  | 0.19748  | 1.66511  | C | 3.11624  | -1.16431 | 2.69441  |
| C               | -2.24049 | -1.88538 | -1.15475 | C | 3.30084  | 2.81301  | -0.65373 |
| C               | -2.62836 | -2.68155 | -2.26574 | C | 6.57604  | -0.92757 | -1.00975 |
| C               | -2.73444 | -2.17455 | 0.13289  | C | -3.29747 | 2.23329  | 1.40380  |
| C               | -3.46314 | -3.76187 | -2.01947 | C | -2.69363 | -2.67224 | -0.02668 |
| C               | -3.57270 | -3.26950 | 0.29963  | C | -7.10052 | -0.37333 | -0.60118 |
| C               | -3.94294 | -4.08174 | -0.75598 | C | 4.51937  | 3.69103  | -0.31305 |
| H               | -3.75513 | -4.38211 | -2.85686 | H | 4.33273  | 4.71958  | -0.63435 |
| H               | -3.95137 | -3.49448 | 1.29109  | H | 4.70494  | 3.69848  | 0.76425  |
| C               | -2.25392 | -2.38892 | -3.70724 | H | 5.42967  | 3.34817  | -0.80545 |
| C               | -3.16826 | -1.29896 | -4.27062 | C | 2.10962  | 3.47350  | 0.03633  |
| C               | -2.26982 | -3.61180 | -4.61648 | H | 1.15276  | 3.07575  | -0.30097 |
| H               | -1.23656 | -2.00939 | -3.72238 | H | 2.16850  | 3.39734  | 1.12745  |
| H               | -3.11458 | -0.37790 | -3.68745 | H | 2.11060  | 4.54085  | -0.20385 |
| H               | -2.87976 | -1.05890 | -5.29691 | C | 3.05779  | 2.85994  | -2.16561 |
| H               | -4.20976 | -1.63403 | -4.27869 | H | 3.92849  | 2.52015  | -2.72942 |
| H               | -1.67890 | -4.43115 | -4.20160 | H | 2.21386  | 2.22759  | -2.45030 |
| H               | -3.28071 | -3.97736 | -4.81790 | H | 2.84300  | 3.88699  | -2.47507 |
| H               | -1.83261 | -3.34158 | -5.58018 | C | 7.73692  | 0.07101  | -0.93712 |
| C               | -2.43828 | -1.34332 | 1.36412  | H | 8.61420  | -0.33311 | -1.45028 |
| C               | -1.80843 | -2.17775 | 2.47622  | H | 7.48447  | 1.02204  | -1.41047 |
| C               | -3.69683 | -0.63333 | 1.86090  | H | 8.01334  | 0.27509  | 0.10042  |
| H               | -1.71621 | -0.56248 | 1.11240  | C | 7.03903  | -2.24474 | -0.39259 |
| H               | -0.91907 | -2.70410 | 2.12588  | H | 7.89727  | -2.62617 | -0.95123 |
| H               | -1.51953 | -1.53367 | 3.31013  | H | 7.35273  | -2.12114 | 0.64727  |
| H               | -2.50902 | -2.92236 | 2.86143  | H | 6.25545  | -3.00548 | -0.42891 |
| H               | -4.13724 | -0.00937 | 1.08159  | C | 6.21783  | -1.18589 | -2.47836 |
| H               | -4.45224 | -1.35435 | 2.18319  | H | 5.38864  | -1.89248 | -2.55914 |
| H               | -3.45607 | 0.00469  | 2.71482  | H | 5.92144  | -0.26740 | -2.98891 |
| C               | -4.84369 | -5.27294 | -0.53835 | H | 7.07901  | -1.60227 | -3.00889 |
| C               | -4.13077 | -6.58015 | -0.87764 | C | 4.12082  | -2.19805 | 3.21215  |
| C               | -6.15115 | -5.14276 | -1.31599 | H | 5.10947  | -1.76449 | 3.37965  |
| H               | -5.09076 | -5.29404 | 0.52904  | H | 3.76191  | -2.58358 | 4.16926  |
| H               | -3.20876 | -6.69132 | -0.30324 | H | 4.22266  | -3.05036 | 2.53641  |
| H               | -4.77586 | -7.43479 | -0.65866 | C | 2.96961  | -0.11039 | 3.80082  |
| H               | -3.87010 | -6.62307 | -1.93835 | H | 3.92178  | 0.39411  | 3.98245  |
| H               | -6.67729 | -4.22085 | -1.05925 | H | 2.22546  | 0.65117  | 3.55918  |
| H               | -5.97089 | -5.13613 | -2.39409 | H | 2.65455  | -0.59058 | 4.73175  |
| H               | -6.81114 | -5.98559 | -1.09588 | C | 1.79162  | -1.90925 | 2.50180  |
| Cl              | 1.30069  | -2.72813 | -2.55678 | H | 0.95285  | -1.23358 | 2.32033  |
| Si              | 1.30520  | -0.58633 | -2.25681 | H | 1.84389  | -2.59801 | 1.65679  |
| O               | -0.50559 | -0.28834 | -2.71353 | H | 1.55518  | -2.47733 | 3.40663  |
| Cl              | -2.26164 | 1.16582  | -0.96374 | C | -1.81789 | 2.29390  | 1.75525  |
| <b>R = Mes*</b> |          |          |          | H | -1.46152 | 1.34638  | 2.16614  |
| P               | 1.20466  | 0.95553  | 1.22664  | H | -1.18785 | 2.57632  | 0.91342  |
| C               | 0.44039  | 0.39573  | -0.13846 | H | -1.66129 | 3.05314  | 2.52538  |
| P               | -1.23677 | 0.31302  | -0.63610 | C | -4.03812 | 2.05767  | 2.74585  |
| Cl              | 1.53608  | -2.36702 | -1.31070 | H | -3.76432 | 2.87532  | 3.41810  |
| O               | -0.98909 | -0.66880 | -1.79873 | H | -5.12196 | 2.06874  | 2.62670  |
| C               | -2.85166 | -0.03796 | 0.13267  | H | -3.76041 | 1.11572  | 3.22497  |
| C               | -3.42209 | -1.31793 | -0.13185 | C | -3.72718 | 3.56609  | 0.78485  |
| C               | -3.70296 | 1.01698  | 0.54920  | H | -4.80242 | 3.60461  | 0.60108  |
| C               | -4.78913 | -1.36531 | -0.35992 | H | -3.48231 | 4.38119  | 1.47118  |
| C               | -5.06748 | 0.87594  | 0.32077  | H | -3.21525 | 3.75261  | -0.15885 |
| C               | -5.62657 | -0.26458 | -0.23175 | C | -1.38052 | -2.55833 | 0.74326  |
| H               | -5.22241 | -2.31837 | -0.63323 | H | -0.96505 | -3.55712 | 0.89708  |
| H               | -5.71392 | 1.69795  | 0.59444  | H | -0.60682 | -2.00011 | 0.22304  |
| C               | 2.96664  | 0.63423  | 0.80916  | H | -1.54544 | -2.10929 | 1.72653  |
|                 |          |          |          | C | -2.48472 | -3.33989 | -1.38882 |

|    |          |          |          |
|----|----------|----------|----------|
| H  | -1.81709 | -2.76380 | -2.02402 |
| H  | -2.05298 | -4.33408 | -1.24537 |
| H  | -3.43912 | -3.46156 | -1.90821 |
| C  | -3.57490 | -3.61088 | 0.82260  |
| H  | -3.84238 | -3.15402 | 1.77848  |
| H  | -4.49356 | -3.90973 | 0.31660  |
| H  | -3.01103 | -4.52389 | 1.02881  |
| C  | -7.84565 | 0.94382  | -0.40231 |
| H  | -7.86228 | 1.25023  | 0.64676  |
| H  | -7.40451 | 1.75173  | -0.99135 |
| H  | -8.88311 | 0.82709  | -0.72414 |
| C  | -7.77342 | -1.44517 | 0.26468  |
| H  | -7.31818 | -2.42730 | 0.12369  |
| H  | -7.70493 | -1.19194 | 1.32550  |
| H  | -8.83167 | -1.52778 | 0.00225  |
| C  | -7.20880 | -0.77113 | -2.07826 |
| H  | -6.74635 | -0.01853 | -2.72124 |
| H  | -6.71917 | -1.72646 | -2.27677 |
| H  | -8.25964 | -0.86625 | -2.36497 |
| Si | 0.90058  | -0.40351 | -1.91658 |
| Cl | -1.61664 | 2.08730  | -1.59641 |

**R-P=C(Si(II)Cl)-P(O)MeR**

**R= H**

|    |          |          |          |
|----|----------|----------|----------|
| P  | 0.84178  | 0.04401  | 1.07484  |
| C  | 0.47022  | -0.29468 | -0.50374 |
| P  | -1.05794 | -0.24430 | -1.34110 |
| Cl | 1.12088  | -2.69170 | -2.30979 |
| Si | 1.31530  | -0.54912 | -2.30172 |
| O  | -0.48505 | -0.16242 | -2.77297 |
| C  | -2.23308 | 1.05998  | -0.99714 |
| H  | -3.07111 | 0.99102  | -1.69396 |
| H  | -2.60021 | 0.95215  | 0.02632  |
| H  | -1.73997 | 2.02612  | -1.10992 |
| H  | 2.25720  | -0.15447 | 0.99148  |
| H  | -1.77725 | -1.44043 | -1.14831 |

**R = Me**

|    |          |          |          |
|----|----------|----------|----------|
| P  | 0.76849  | 0.09811  | 1.00485  |
| C  | 0.39150  | -0.23545 | -0.57125 |
| P  | -1.15284 | -0.27826 | -1.37554 |
| Cl | 1.34418  | -2.55140 | -2.41711 |
| Si | 1.21847  | -0.39302 | -2.37490 |
| O  | -0.59466 | -0.23135 | -2.82467 |
| C  | -2.28772 | 1.08140  | -1.08779 |
| H  | -3.14616 | 0.99617  | -1.75767 |
| H  | -2.63054 | 1.06352  | -0.05111 |
| H  | -1.76814 | 2.02032  | -1.28083 |
| C  | 2.59601  | -0.08972 | 1.04706  |
| H  | 3.04935  | 0.18944  | 0.09354  |
| H  | 3.01382  | 0.51462  | 1.85402  |
| H  | 2.83604  | -1.13780 | 1.24943  |
| C  | -2.05120 | -1.79944 | -1.07988 |
| H  | -2.39670 | -1.83264 | -0.04460 |
| H  | -2.90503 | -1.86169 | -1.75799 |
| H  | -1.36953 | -2.62980 | -1.26961 |

**R = t-Bu**

|    |          |          |          |
|----|----------|----------|----------|
| P  | 0.66552  | 0.11636  | 0.72656  |
| C  | 0.44086  | -0.27808 | -0.86995 |
| P  | -1.11618 | -0.46662 | -1.65676 |
| Cl | 1.90574  | -2.45851 | -2.65051 |
| Si | 1.24712  | -0.40849 | -2.69270 |
| O  | -0.55592 | -0.68175 | -3.09423 |
| C  | -2.13327 | 1.01691  | -1.61701 |

|   |          |          |          |
|---|----------|----------|----------|
| H | -3.02279 | 0.89764  | -2.23746 |
| H | -2.42276 | 1.25204  | -0.59189 |
| H | -1.52814 | 1.83423  | -2.01183 |
| C | -2.14658 | -1.89011 | -1.13243 |
| C | -2.74377 | -1.59617 | 0.24291  |
| H | -3.45512 | -0.76777 | 0.21746  |
| H | -3.28251 | -2.48231 | 0.59001  |
| H | -1.97100 | -1.36837 | 0.98233  |
| C | -3.24718 | -2.08448 | -2.17781 |
| H | -2.82879 | -2.23536 | -3.17482 |
| H | -3.82647 | -2.97453 | -1.91611 |
| H | -3.94115 | -1.24170 | -2.21367 |
| C | -1.26624 | -3.13710 | -1.07097 |
| H | -0.79702 | -3.35115 | -2.03185 |
| H | -0.47327 | -3.03649 | -0.32846 |
| H | -1.89115 | -3.99080 | -0.79292 |
| C | 2.51185  | 0.10497  | 1.04121  |
| C | 2.98180  | -1.34995 | 1.03727  |
| H | 2.43042  | -1.95528 | 1.76315  |
| H | 2.86446  | -1.80676 | 0.05316  |
| H | 4.04157  | -1.39097 | 1.31341  |
| C | 3.27194  | 0.92149  | 0.00510  |
| H | 4.34029  | 0.91915  | 0.24839  |
| H | 3.16338  | 0.51613  | -1.00354 |
| H | 2.93731  | 1.96194  | -0.01516 |
| C | 2.70796  | 0.71117  | 2.43092  |
| H | 3.76882  | 0.69053  | 2.69893  |
| H | 2.37333  | 1.75158  | 2.46941  |
| H | 2.15844  | 0.15485  | 3.19548  |

**R = Ph**

|    |          |          |          |
|----|----------|----------|----------|
| P  | 0.91565  | -0.53044 | 1.06071  |
| C  | 0.35667  | -0.33559 | -0.49162 |
| P  | -1.31374 | -0.23503 | -0.98296 |
| Cl | 1.13886  | -1.46917 | -3.34916 |
| Si | 0.81908  | 0.38235  | -2.28434 |
| O  | -1.05582 | 0.40260  | -2.37485 |
| C  | -2.13426 | -1.82013 | -1.16117 |
| C  | -2.37344 | -2.32460 | -2.43548 |
| C  | -2.51700 | -2.54802 | -0.03552 |
| C  | -3.00719 | -3.54979 | -2.57962 |
| H  | -2.05225 | -1.76093 | -3.30276 |
| C  | -3.14678 | -3.77101 | -0.18735 |
| H  | -2.31034 | -2.17237 | 0.96164  |
| C  | -3.39432 | -4.26986 | -1.45997 |
| H  | -3.19199 | -3.94456 | -3.57176 |
| H  | -3.44145 | -4.33887 | 0.68739  |
| H  | -3.88624 | -5.22879 | -1.57680 |
| C  | 2.71542  | -0.56181 | 0.92895  |
| C  | 3.42133  | -0.83436 | -0.24636 |
| C  | 3.42705  | -0.29830 | 2.10363  |
| C  | 4.80544  | -0.81507 | -0.24633 |
| H  | 2.88626  | -1.09333 | -1.15292 |
| C  | 4.81164  | -0.27433 | 2.09903  |
| H  | 2.88466  | -0.10184 | 3.02371  |
| C  | 5.50121  | -0.53005 | 0.92195  |
| H  | 5.34501  | -1.02889 | -1.16183 |
| H  | 5.35388  | -0.06003 | 3.01289  |
| H  | 6.58536  | -0.51724 | 0.91614  |
| C  | -2.39017 | 0.80313  | 0.00936  |
| H  | -3.36018 | 0.89865  | -0.48231 |
| H  | -2.52673 | 0.36241  | 0.99877  |
| H  | -1.92600 | 1.78468  | 0.11307  |

**R = Mes**

|                 |          |          |          |   |          |          |          |
|-----------------|----------|----------|----------|---|----------|----------|----------|
| P               | 1.08691  | -1.10708 | 1.43205  | C | 3.54833  | -0.43122 | 1.34711  |
| C               | 0.33606  | -0.58878 | 0.04827  | C | 3.67915  | 1.42477  | -0.24401 |
| P               | -1.34330 | -0.40256 | -0.43626 | C | 4.72723  | -0.93144 | 0.79916  |
| Cl              | 1.12925  | -0.91280 | -2.95583 | C | 4.84770  | 0.85975  | -0.73896 |
| Si              | 0.82555  | 0.61729  | -1.44799 | C | 5.35747  | -0.34935 | -0.28748 |
| O               | -1.04275 | 0.67026  | -1.52110 | H | 5.16350  | -1.81665 | 1.23301  |
| C               | -2.16792 | -1.86652 | -1.10140 | H | 5.39158  | 1.38721  | -1.50982 |
| C               | -2.73910 | -1.86779 | -2.39332 | C | 3.01943  | -1.06802 | 2.64991  |
| C               | -2.27195 | -3.00909 | -0.28687 | C | 3.32388  | 2.85576  | -0.70852 |
| C               | -3.38007 | -3.02228 | -2.82474 | C | 6.59125  | -0.95246 | -0.95148 |
| C               | -2.93009 | -4.13138 | -0.77385 | C | -3.31217 | 2.40257  | 1.17590  |
| C               | -3.48318 | -4.16477 | -2.04332 | C | -2.75734 | -2.59332 | 0.11069  |
| H               | -3.82232 | -3.02094 | -3.81619 | C | -7.14935 | -0.31066 | -0.61477 |
| H               | -3.00887 | -5.00505 | -0.13379 | C | 4.58026  | 3.59786  | -1.18738 |
| C               | 2.84985  | -0.74714 | 1.10634  | H | 4.32732  | 4.64825  | -1.35089 |
| C               | 3.64293  | -1.67764 | 0.42020  | H | 5.38587  | 3.55346  | -0.45073 |
| C               | 3.42380  | 0.41345  | 1.64202  | H | 4.95737  | 3.21267  | -2.13669 |
| C               | 4.99929  | -1.41698 | 0.27127  | C | 2.77079  | 3.68549  | 0.45336  |
| C               | 4.78373  | 0.63406  | 1.46702  | H | 1.80509  | 3.32084  | 0.82022  |
| C               | 5.58838  | -0.26654 | 0.78096  | H | 3.46275  | 3.69520  | 1.29894  |
| H               | 5.61447  | -2.13839 | -0.25902 | H | 2.61022  | 4.71678  | 0.12683  |
| H               | 5.22594  | 1.53676  | 1.87903  | C | 2.32763  | 2.87227  | -1.87132 |
| C               | -2.46588 | 0.34798  | 0.75644  | H | 2.67862  | 2.25495  | -2.70039 |
| H               | -3.35890 | 0.67379  | 0.21794  | H | 1.35278  | 2.49367  | -1.57005 |
| H               | -2.75868 | -0.35057 | 1.53936  | H | 2.20148  | 3.89775  | -2.23297 |
| H               | -1.97191 | 1.21449  | 1.19829  | C | 7.77429  | 0.01488  | -0.82962 |
| C               | 2.58715  | 1.42732  | 2.36283  | H | 8.65948  | -0.40914 | -1.31246 |
| H               | 1.94415  | 1.96771  | 1.66090  | H | 7.56421  | 0.97521  | -1.30488 |
| H               | 1.93317  | 0.95914  | 3.10637  | H | 8.01688  | 0.20520  | 0.21899  |
| H               | 3.21217  | 2.15846  | 2.87750  | C | 6.99545  | -2.28368 | -0.32341 |
| C               | 3.05574  | -2.92973 | -0.15927 | H | 7.86243  | -2.68734 | -0.85229 |
| H               | 2.43951  | -3.46239 | 0.57276  | H | 7.27478  | -2.17158 | 0.72749  |
| H               | 2.41618  | -2.70173 | -1.01686 | H | 6.19263  | -3.02194 | -0.39024 |
| H               | 3.84145  | -3.60924 | -0.49247 | C | 6.28418  | -1.19650 | -2.43411 |
| C               | 7.04699  | 0.00647  | 0.57430  | H | 5.44137  | -1.88191 | -2.54963 |
| H               | 7.62308  | -0.91956 | 0.52603  | H | 6.03084  | -0.26883 | -2.95128 |
| H               | 7.21077  | 0.54223  | -0.36608 | H | 7.15445  | -1.63267 | -2.93313 |
| H               | 7.45504  | 0.62338  | 1.37708  | C | 3.99282  | -2.10974 | 3.20997  |
| C               | -1.67651 | -3.11136 | 1.08623  | H | 4.98878  | -1.69480 | 3.38148  |
| H               | -0.64189 | -3.46091 | 1.03298  | H | 3.61078  | -2.46150 | 4.17119  |
| H               | -1.65396 | -2.17134 | 1.63744  | H | 4.08472  | -2.98180 | 2.55830  |
| H               | -2.23711 | -3.82950 | 1.68670  | C | 2.88783  | 0.02351  | 3.72156  |
| C               | -2.70791 | -0.70802 | -3.34644 | H | 3.84919  | 0.51290  | 3.89657  |
| H               | -3.07576 | 0.21538  | -2.89870 | H | 2.16326  | 0.79289  | 3.44658  |
| H               | -1.69106 | -0.50621 | -3.68655 | H | 2.55328  | -0.41979 | 4.66405  |
| C               | -3.32525 | -0.93744 | -4.21551 | C | 1.67793  | -1.78347 | 2.47149  |
| C               | -4.15686 | -5.39510 | -2.56548 | H | 0.86026  | -1.09270 | 2.25983  |
| H               | -3.47072 | -5.96984 | -3.19523 | H | 1.71793  | -2.50263 | 1.65191  |
| H               | -4.48353 | -6.04694 | -1.75387 | H | 1.42155  | -2.31345 | 3.39397  |
| H               | -5.02492 | -5.14375 | -3.17800 | C | -1.83203 | 2.46701  | 1.52731  |
|                 |          |          |          | H | -1.49672 | 1.55164  | 2.01916  |
|                 |          |          |          | H | -1.17746 | 2.65610  | 0.67773  |
|                 |          |          |          | H | -1.66249 | 3.28826  | 2.22785  |
|                 |          |          |          | C | -4.05005 | 2.33555  | 2.52908  |
|                 |          |          |          | H | -3.76729 | 3.19715  | 3.14017  |
|                 |          |          |          | H | -5.13387 | 2.34736  | 2.41038  |
|                 |          |          |          | H | -3.77975 | 1.42818  | 3.07403  |
|                 |          |          |          | C | -3.73641 | 3.69380  | 0.46941  |
|                 |          |          |          | H | -4.81598 | 3.73669  | 0.31496  |
|                 |          |          |          | H | -3.45850 | 4.55551  | 1.08207  |
|                 |          |          |          | H | -3.26162 | 3.81101  | -0.50559 |
|                 |          |          |          | C | -1.43431 | -2.43396 | 0.85290  |
|                 |          |          |          | H | -1.02144 | -3.42158 | 1.07174  |
|                 |          |          |          | H | -0.66952 | -1.91487 | 0.28288  |
|                 |          |          |          | H | -1.58449 | -1.91552 | 1.80386  |
|                 |          |          |          | C | -2.57090 | -3.36044 | -1.20138 |
| <b>R = Mes*</b> |          |          |          |   |          |          |          |
| P               | 1.18182  | 1.07424  | 1.07833  |   |          |          |          |
| C               | 0.40715  | 0.42425  | -0.24018 |   |          |          |          |
| P               | -1.28667 | 0.36830  | -0.76095 |   |          |          |          |
| Cl              | 1.46512  | -2.45970 | -1.23156 |   |          |          |          |
| O               | -1.02849 | -0.75377 | -1.81663 |   |          |          |          |
| C               | -2.88467 | 0.04234  | 0.07908  |   |          |          |          |
| C               | -3.47323 | -1.24367 | -0.08685 |   |          |          |          |
| C               | -3.73171 | 1.13137  | 0.41070  |   |          |          |          |
| C               | -4.84268 | -1.29742 | -0.30875 |   |          |          |          |
| C               | -5.09930 | 0.98998  | 0.19592  |   |          |          |          |
| C               | -5.67175 | -0.18483 | -0.26397 |   |          |          |          |
| H               | -5.28331 | -2.26515 | -0.50996 |   |          |          |          |
| H               | -5.73794 | 1.83581  | 0.41017  |   |          |          |          |
| C               | 2.94959  | 0.68681  | 0.72173  |   |          |          |          |

|    |          |          |          |
|----|----------|----------|----------|
| H  | -1.90927 | -2.83404 | -1.88429 |
| H  | -2.14070 | -4.34355 | -0.99180 |
| H  | -3.53308 | -3.51566 | -1.69741 |
| C  | -3.63704 | -3.45712 | 1.03729  |
| H  | -3.88715 | -2.92799 | 1.96014  |
| H  | -4.56559 | -3.78254 | 0.56662  |
| H  | -3.07953 | -4.35839 | 1.30383  |
| C  | -7.88140 | 1.02561  | -0.52399 |
| H  | -7.88973 | 1.41923  | 0.49566  |
| H  | -7.43578 | 1.77718  | -1.18060 |
| H  | -8.92165 | 0.89272  | -0.83030 |
| C  | -7.82568 | -1.29823 | 0.34364  |
| H  | -7.37869 | -2.29239 | 0.28458  |
| H  | -7.74725 | -0.95572 | 1.37836  |
| H  | -8.88650 | -1.39418 | 0.09622  |
| C  | -7.27374 | -0.83210 | -2.05138 |
| H  | -6.81351 | -0.13977 | -2.76053 |
| H  | -6.79104 | -1.80379 | -2.17213 |
| H  | -8.32752 | -0.94495 | -2.32045 |
| Si | 0.83141  | -0.53326 | -1.94811 |
| C  | -1.62980 | 1.81924  | -1.78742 |
| H  | -2.55746 | 1.63272  | -2.33172 |
| H  | -1.70360 | 2.75563  | -1.24415 |
| H  | -0.80363 | 1.87618  | -2.50044 |

**R-P=C(Si(III)Cl)-P(S)ClR**

**R= H**

|    |          |          |          |
|----|----------|----------|----------|
| P  | 0.99152  | 0.22682  | 0.98007  |
| C  | 0.49617  | -0.11461 | -0.56518 |
| P  | -1.10124 | -0.04251 | -1.23519 |
| S  | -0.69541 | 0.57755  | -3.07184 |
| Cl | 0.97149  | -2.44742 | -2.53073 |
| Si | 1.42024  | -0.36218 | -2.29969 |
| Cl | -2.50871 | 1.01145  | -0.22884 |
| H  | -1.67936 | -1.32215 | -1.20443 |
| H  | 2.39015  | 0.01140  | 0.75994  |

**R = Me**

|    |          |          |          |
|----|----------|----------|----------|
| P  | 0.99559  | 0.05330  | 0.92101  |
| C  | 0.48717  | -0.17723 | -0.64198 |
| P  | -1.13172 | -0.10293 | -1.25429 |
| S  | -0.77139 | 0.41055  | -3.14649 |
| Cl | 1.23084  | -2.43084 | -2.66621 |
| Si | 1.38975  | -0.30114 | -2.38892 |
| C  | 2.79794  | -0.27392 | 0.82146  |
| H  | 3.20800  | -0.01883 | -0.15937 |
| H  | 3.31445  | 0.28810  | 1.60133  |
| H  | 2.97181  | -1.33904 | 1.00196  |
| C  | -1.97855 | -1.67824 | -1.09593 |
| H  | -1.34208 | -2.43401 | -1.56095 |
| H  | -2.12973 | -1.90201 | -0.03874 |
| H  | -2.93755 | -1.62008 | -1.61225 |
| Cl | -2.38761 | 1.18338  | -0.28961 |

**R = t-Bu**

|    |          |          |          |
|----|----------|----------|----------|
| P  | 0.92547  | -0.11459 | 1.01122  |
| C  | 0.51219  | -0.04298 | -0.60267 |
| P  | -1.15865 | -0.14499 | -1.11294 |
| S  | -1.01959 | 0.53455  | -2.98568 |
| Cl | 1.89748  | -1.38633 | -3.13567 |
| Si | 1.28702  | 0.51038  | -2.33461 |
| C  | -1.94543 | -1.82072 | -0.99031 |
| C  | -1.05042 | -2.80386 | -1.74198 |
| H  | -1.52102 | -3.79036 | -1.70146 |
| H  | -0.92759 | -2.52596 | -2.78938 |

|    |          |          |          |
|----|----------|----------|----------|
| H  | -0.05785 | -2.87951 | -1.29605 |
| C  | -3.31870 | -1.74496 | -1.65396 |
| H  | -3.76317 | -2.74394 | -1.63886 |
| H  | -3.99219 | -1.06767 | -1.12647 |
| H  | -3.24453 | -1.42662 | -2.69590 |
| C  | -2.07002 | -2.22856 | 0.47411  |
| H  | -2.73842 | -1.56962 | 1.02923  |
| H  | -2.48161 | -3.24114 | 0.51297  |
| H  | -1.10136 | -2.24408 | 0.97852  |
| C  | 2.79153  | -0.04764 | 1.13437  |
| C  | 3.42265  | -1.23492 | 0.41285  |
| H  | 3.04389  | -2.18702 | 0.79535  |
| H  | 3.23903  | -1.20995 | -0.66175 |
| H  | 4.50626  | -1.22283 | 0.57483  |
| C  | 3.09959  | -0.12888 | 2.63084  |
| H  | 4.18191  | -0.08869 | 2.78660  |
| H  | 2.65010  | 0.70076  | 3.18329  |
| H  | 2.73256  | -1.06086 | 3.06960  |
| C  | 3.30820  | 1.27600  | 0.57640  |
| H  | 3.11844  | 1.37629  | -0.49523 |
| H  | 2.85377  | 2.13283  | 1.08105  |
| H  | 4.39114  | 1.33641  | 0.73093  |
| Cl | -2.39603 | 1.03535  | 0.00834  |

**R = Ph**

|    |          |          |          |
|----|----------|----------|----------|
| P  | 0.96493  | 0.36943  | 0.26073  |
| C  | 0.45431  | -0.22840 | -1.20826 |
| P  | -1.18729 | -0.22059 | -1.76732 |
| C  | 2.73102  | 0.01378  | 0.31850  |
| C  | 3.35657  | -1.03639 | -0.36107 |
| C  | 3.50365  | 0.86068  | 1.12061  |
| C  | 4.72715  | -1.20960 | -0.26343 |
| C  | 4.87432  | 0.68907  | 1.20895  |
| C  | 5.48661  | -0.34497 | 0.51337  |
| H  | 5.20362  | -2.02694 | -0.79228 |
| H  | 5.46596  | 1.35760  | 1.82364  |
| C  | -2.09635 | -1.68543 | -1.24699 |
| C  | -2.49161 | -2.63275 | -2.18271 |
| C  | -2.36929 | -1.87186 | 0.10712  |
| C  | -3.16997 | -3.76706 | -1.76187 |
| C  | -3.04467 | -3.00654 | 0.51792  |
| C  | -3.44609 | -3.95332 | -0.41685 |
| H  | -3.47777 | -4.50810 | -2.49001 |
| H  | -3.25855 | -3.15428 | 1.56993  |
| S  | -0.91963 | -0.09283 | -3.73493 |
| Cl | 1.15581  | -2.78716 | -2.94222 |
| Si | 1.29589  | -0.63822 | -2.93866 |
| H  | -2.05642 | -1.13314 | 0.83710  |
| H  | -2.25979 | -2.48346 | -3.23027 |
| H  | -3.97467 | -4.84196 | -0.09118 |
| H  | 3.02212  | 1.66554  | 1.66776  |
| H  | 6.55919  | -0.48503 | 0.58653  |
| H  | 2.76642  | -1.74429 | -0.93233 |
| Cl | -2.31068 | 1.31051  | -1.01440 |

**R = Mes\***

|    |          |          |          |
|----|----------|----------|----------|
| P  | 1.12946  | 0.69069  | 1.22483  |
| C  | 0.43737  | 0.29826  | -0.24228 |
| P  | -1.25661 | 0.31043  | -0.70903 |
| Cl | 1.88974  | -2.23060 | -1.48792 |
| C  | -2.83915 | -0.00696 | 0.17148  |
| C  | -3.42549 | -1.29020 | -0.03979 |
| C  | -3.68103 | 1.06038  | 0.58082  |
| C  | -4.79362 | -1.33479 | -0.26206 |
| C  | -5.04582 | 0.92972  | 0.34232  |

|   |          |          |          |
|---|----------|----------|----------|
| C | -5.61667 | -0.21845 | -0.18278 |
| H | -5.23808 | -2.29654 | -0.48633 |
| H | -5.68396 | 1.76558  | 0.59339  |
| C | 2.92278  | 0.51055  | 0.86181  |
| C | 3.61485  | -0.61346 | 1.38233  |
| C | 3.58650  | 1.38292  | -0.03320 |
| C | 4.82474  | -0.96475 | 0.79551  |
| C | 4.79057  | 0.95319  | -0.58314 |
| C | 5.39892  | -0.24198 | -0.24067 |
| H | 5.33295  | -1.84727 | 1.14887  |
| H | 5.27895  | 1.59482  | -1.30611 |
| C | 3.12707  | -1.42545 | 2.59859  |
| C | 3.21860  | 2.85168  | -0.33839 |
| C | 6.66647  | -0.69073 | -0.96041 |
| C | -3.27455 | 2.25995  | 1.46189  |
| C | -2.73730 | -2.65358 | 0.18308  |
| C | -7.08800 | -0.31724 | -0.56424 |
| C | 4.36501  | 3.71100  | 0.22766  |
| H | 4.16512  | 4.76806  | 0.03046  |
| H | 4.45523  | 3.57634  | 1.30879  |
| H | 5.32731  | 3.46173  | -0.22064 |
| C | 1.94326  | 3.37093  | 0.31943  |
| H | 1.04042  | 2.98350  | -0.15039 |
| H | 1.91249  | 3.15499  | 1.39327  |
| H | 1.91442  | 4.45999  | 0.21926  |
| C | 3.10459  | 3.10499  | -1.84503 |
| H | 4.03676  | 2.89035  | -2.37042 |
| H | 2.32375  | 2.48549  | -2.29107 |
| H | 2.86058  | 4.15602  | -2.02437 |
| C | 7.77078  | 0.35627  | -0.77563 |
| H | 8.67934  | 0.04067  | -1.29633 |
| H | 7.47993  | 1.32914  | -1.17700 |
| H | 8.01285  | 0.48764  | 0.28207  |
| C | 7.18502  | -2.02935 | -0.44171 |
| H | 8.07491  | -2.31807 | -1.00640 |
| H | 7.46788  | -1.97738 | 0.61297  |
| H | 6.44416  | -2.82348 | -0.56201 |
| C | 6.35294  | -0.84339 | -2.45393 |
| H | 5.56370  | -1.58186 | -2.61246 |
| H | 6.01835  | 0.09832  | -2.89377 |
| H | 7.24572  | -1.16955 | -2.99526 |
| C | 4.17436  | -2.44019 | 3.06617  |
| H | 5.12976  | -1.96694 | 3.30441  |
| H | 3.80892  | -2.92400 | 3.97500  |
| H | 4.34797  | -3.22596 | 2.32736  |
| C | 2.88601  | -0.47366 | 3.77884  |
| H | 3.79979  | 0.07109  | 4.02870  |
| H | 2.10229  | 0.25800  | 3.57338  |
| H | 2.57771  | -1.04469 | 4.65936  |
| C | 1.85468  | -2.22112 | 2.30062  |
| H | 0.99402  | -1.57362 | 2.11916  |
| H | 1.97823  | -2.85234 | 1.41911  |
| H | 1.60481  | -2.85354 | 3.15801  |
| C | -1.80300 | 2.29103  | 1.85185  |
| H | -1.47792 | 1.33257  | 2.26183  |
| H | -1.14374 | 2.56411  | 1.03092  |
| H | -1.65591 | 3.04081  | 2.63340  |
| C | -4.04431 | 2.05944  | 2.78564  |
| H | -3.76624 | 2.85198  | 3.48566  |
| H | -5.12531 | 2.09599  | 2.64763  |
| H | -3.79364 | 1.09890  | 3.24218  |
| C | -3.68381 | 3.61266  | 0.87408  |
| H | -4.75407 | 3.66003  | 0.66436  |
| H | -3.45599 | 4.40387  | 1.59343  |
| H | -3.14808 | 3.83035  | -0.04886 |
| C | -1.28885 | -2.56023 | 0.64708  |

|    |          |          |          |
|----|----------|----------|----------|
| H  | -0.96319 | -3.54610 | 0.98852  |
| H  | -0.59508 | -2.26223 | -0.13592 |
| H  | -1.19205 | -1.87467 | 1.49266  |
| C  | -2.83681 | -3.58653 | -1.02519 |
| H  | -2.26780 | -3.20283 | -1.87083 |
| H  | -2.43314 | -4.56738 | -0.76023 |
| H  | -3.87150 | -3.73099 | -1.34382 |
| C  | -3.50285 | -3.30144 | 1.35766  |
| H  | -3.47532 | -2.66270 | 2.24400  |
| H  | -4.54766 | -3.50188 | 1.11821  |
| H  | -3.02775 | -4.25316 | 1.60975  |
| C  | -7.81325 | 1.01815  | -0.42148 |
| H  | -7.83970 | 1.36068  | 0.61615  |
| H  | -7.34935 | 1.79768  | -1.03087 |
| H  | -8.84785 | 0.90792  | -0.75467 |
| C  | -7.78857 | -1.34635 | 0.33095  |
| H  | -7.35048 | -2.34096 | 0.22766  |
| H  | -7.72574 | -1.05819 | 1.38317  |
| H  | -8.84556 | -1.41922 | 0.06064  |
| C  | -7.18575 | -0.76633 | -2.02732 |
| H  | -6.70385 | -0.04475 | -2.69119 |
| H  | -6.70833 | -1.73540 | -2.18495 |
| H  | -8.23453 | -0.85579 | -2.32332 |
| Si | 1.19699  | -0.25169 | -1.98890 |
| S  | -1.11410 | -0.80737 | -2.35954 |
| Cl | -1.56241 | 2.21532  | -1.44969 |

**R-P=C(Si(II)Cl)-P(S)MeR**

**R = H**

|    |          |          |          |
|----|----------|----------|----------|
| P  | 1.05530  | -0.00794 | 1.07853  |
| C  | 0.59421  | -0.32648 | -0.48245 |
| P  | -1.00307 | -0.14272 | -1.17651 |
| S  | -0.48629 | 0.34663  | -3.04205 |
| Cl | 1.02407  | -2.71260 | -2.33466 |
| Si | 1.57823  | -0.64039 | -2.16206 |
| H  | -1.64786 | -1.39437 | -1.11868 |
| H  | 2.45618  | -0.25909 | 0.91202  |
| C  | -2.15501 | 0.97779  | -0.36609 |
| H  | -3.09072 | 0.99945  | -0.92839 |
| H  | -2.34578 | 0.62869  | 0.65156  |
| H  | -1.72137 | 1.97775  | -0.34003 |

**R = Me**

|    |          |          |          |
|----|----------|----------|----------|
| P  | 1.00029  | -0.01430 | 0.87539  |
| C  | 0.50963  | -0.19084 | -0.69937 |
| P  | -1.14277 | -0.11970 | -1.27356 |
| S  | -0.79353 | 0.29313  | -3.20902 |
| Cl | 1.37316  | -2.40412 | -2.67357 |
| Si | 1.41769  | -0.25766 | -2.43803 |
| C  | -2.20641 | 1.09376  | -0.46692 |
| H  | -1.75607 | 2.08105  | -0.56779 |
| H  | -3.18765 | 1.09155  | -0.94619 |
| H  | -2.31349 | 0.84473  | 0.59131  |
| C  | 2.81854  | -0.25457 | 0.78875  |
| H  | 3.22290  | 0.03635  | -0.18411 |
| H  | 3.30322  | 0.31738  | 1.58194  |
| H  | 3.04000  | -1.31329 | 0.95322  |
| C  | -1.94721 | -1.71726 | -1.05788 |
| H  | -1.30453 | -2.47679 | -1.50491 |
| H  | -2.08067 | -1.92235 | 0.00668  |
| H  | -2.91459 | -1.70918 | -1.56383 |

**R = t-Bu**

|   |         |          |          |
|---|---------|----------|----------|
| P | 0.63919 | 0.14610  | 0.54238  |
| C | 0.47687 | -0.28087 | -1.05998 |

|    |          |          |          |
|----|----------|----------|----------|
| P  | -1.13328 | -0.43848 | -1.77469 |
| Cl | 2.12696  | -2.50805 | -2.56288 |
| Si | 1.53822  | -0.44095 | -2.70840 |
| C  | -2.14198 | 1.04234  | -1.53006 |
| H  | -3.09766 | 0.94202  | -2.04655 |
| H  | -2.30564 | 1.21539  | -0.46526 |
| H  | -1.59409 | 1.88428  | -1.95345 |
| C  | -2.11307 | -1.88483 | -1.14723 |
| C  | -2.57674 | -1.61356 | 0.28193  |
| H  | -3.29162 | -0.78983 | 0.33594  |
| H  | -3.07712 | -2.50893 | 0.66214  |
| H  | -1.74086 | -1.39191 | 0.94987  |
| C  | -3.31597 | -2.07367 | -2.07121 |
| H  | -3.00567 | -2.24080 | -3.10455 |
| H  | -3.87500 | -2.95355 | -1.74023 |
| H  | -4.00034 | -1.22244 | -2.04449 |
| C  | -1.22587 | -3.12547 | -1.19126 |
| H  | -0.84798 | -3.31664 | -2.19676 |
| H  | -0.36756 | -3.03471 | -0.52413 |
| H  | -1.81749 | -3.98956 | -0.87512 |
| C  | 2.45406  | 0.10105  | 1.00007  |
| C  | 2.88397  | -1.36295 | 1.09871  |
| H  | 2.25370  | -1.92314 | 1.79599  |
| H  | 2.84634  | -1.86066 | 0.12856  |
| H  | 3.91262  | -1.41402 | 1.47328  |
| C  | 3.32842  | 0.86067  | 0.01202  |
| H  | 4.36531  | 0.85936  | 0.36649  |
| H  | 3.32298  | 0.41068  | -0.98395 |
| H  | 3.01299  | 1.90193  | -0.09199 |
| C  | 2.54172  | 0.75808  | 2.37882  |
| H  | 3.57406  | 0.72125  | 2.74006  |
| H  | 2.23483  | 1.80723  | 2.34793  |
| H  | 1.91142  | 0.24658  | 3.11157  |
| S  | -0.62023 | -0.66947 | -3.71038 |

**R = Ph**

|    |          |          |          |
|----|----------|----------|----------|
| P  | 0.96901  | 0.21906  | 0.32572  |
| C  | 0.46498  | -0.27089 | -1.18373 |
| P  | -1.21720 | -0.21652 | -1.67790 |
| C  | 2.75204  | -0.05620 | 0.35979  |
| C  | 3.42096  | -1.00987 | -0.41308 |
| C  | 3.48834  | 0.74641  | 1.23700  |
| C  | 4.79831  | -1.13034 | -0.32982 |
| C  | 4.86563  | 0.62757  | 1.31240  |
| C  | 5.52137  | -0.30950 | 0.52528  |
| H  | 5.30879  | -1.87272 | -0.93243 |
| H  | 5.42859  | 1.26162  | 1.98774  |
| C  | -2.09778 | -1.71032 | -1.16341 |
| C  | -2.57878 | -2.61160 | -2.10444 |
| C  | -2.28796 | -1.95216 | 0.19639  |
| C  | -3.26159 | -3.74474 | -1.68680 |
| C  | -2.96978 | -3.08436 | 0.60715  |
| C  | -3.45923 | -3.97976 | -0.33537 |
| H  | -3.63261 | -4.44883 | -2.42233 |
| H  | -3.11395 | -3.27280 | 1.66466  |
| S  | -0.98924 | -0.09298 | -3.66730 |
| Cl | 1.22819  | -2.70092 | -3.02659 |
| Si | 1.27633  | -0.54442 | -2.94771 |
| C  | -2.16737 | 1.16089  | -0.99996 |
| H  | -1.66967 | 2.09290  | -1.26853 |
| H  | -3.17216 | 1.14043  | -1.42605 |
| H  | -2.22992 | 1.07666  | 0.08670  |
| H  | -1.88786 | -1.26895 | 0.93903  |
| H  | -2.40481 | -2.42634 | -3.15801 |
| H  | -3.98953 | -4.86810 | -0.01162 |
| H  | 2.97311  | 1.47551  | 1.85519  |

|   |         |          |          |
|---|---------|----------|----------|
| H | 6.59929 | -0.40840 | 0.58681  |
| H | 2.86084 | -1.68515 | -1.05029 |

**R = Mes**

|    |          |          |          |
|----|----------|----------|----------|
| P  | 1.12944  | 0.09831  | 0.71639  |
| C  | 0.62537  | -0.57564 | -0.71821 |
| P  | -1.02936 | -0.48446 | -1.33583 |
| C  | 2.95374  | 0.05521  | 0.61006  |
| C  | 3.66889  | -1.10343 | 0.94232  |
| C  | 3.63570  | 1.24294  | 0.30658  |
| C  | 5.05746  | -1.05333 | 0.95060  |
| C  | 5.02342  | 1.24589  | 0.32381  |
| C  | 5.75409  | 0.10702  | 0.63949  |
| H  | 5.61074  | -1.95107 | 1.21124  |
| H  | 5.54867  | 2.16569  | 0.08267  |
| C  | -2.13802 | -1.92307 | -1.17875 |
| C  | -3.27727 | -1.95767 | -2.01080 |
| C  | -1.92894 | -2.95378 | -0.24113 |
| C  | -4.16907 | -3.01612 | -1.88379 |
| C  | -2.85389 | -3.98782 | -0.16774 |
| C  | -3.97705 | -4.04638 | -0.97809 |
| H  | -5.04422 | -3.03060 | -2.52630 |
| H  | -2.68332 | -4.77699 | 0.55788  |
| S  | -0.47303 | -0.10286 | -3.24380 |
| Cl | 1.32253  | -3.00580 | -2.49312 |
| Si | 1.63338  | -0.85908 | -2.37714 |
| C  | -1.93112 | 0.87524  | -0.54780 |
| H  | -1.39053 | 1.80516  | -0.72517 |
| H  | -2.94815 | 0.95217  | -0.92965 |
| H  | -1.97026 | 0.67518  | 0.52612  |
| C  | 2.89019  | 2.48701  | -0.07209 |
| H  | 2.44042  | 2.38309  | -1.06461 |
| H  | 2.07711  | 2.70274  | 0.62952  |
| H  | 3.55453  | 3.35198  | -0.09299 |
| C  | 2.97259  | -2.38981 | 1.27079  |
| H  | 2.12437  | -2.23312 | 1.94438  |
| H  | 2.58316  | -2.86580 | 0.36569  |
| H  | 3.65736  | -3.09119 | 1.74967  |
| C  | 7.25190  | 0.12492  | 0.62113  |
| H  | 7.66808  | -0.61824 | 1.30360  |
| H  | 7.62853  | -0.10327 | -0.38096 |
| H  | 7.64261  | 1.10527  | 0.90055  |
| C  | -0.75917 | -3.01841 | 0.69202  |
| H  | 0.18090  | -3.05711 | 0.14037  |
| H  | -0.71216 | -2.15506 | 1.35896  |
| H  | -0.83001 | -3.91413 | 1.30977  |
| C  | -3.59508 | -0.94405 | -3.07328 |
| H  | -3.38248 | 0.08585  | -2.78805 |
| H  | -3.01182 | -1.13798 | -3.97659 |
| H  | -4.65317 | -1.00367 | -3.33197 |
| C  | -4.93366 | -5.19426 | -0.89285 |
| H  | -4.59401 | -6.02387 | -1.52070 |
| H  | -5.01379 | -5.57103 | 0.12848  |
| H  | -5.92983 | -4.91002 | -1.23567 |

**R = Mes\***

|    |          |          |          |
|----|----------|----------|----------|
| P  | 1.10170  | 0.73783  | 1.12028  |
| C  | 0.41127  | 0.28526  | -0.32971 |
| P  | -1.30168 | 0.33782  | -0.80787 |
| Cl | 1.85265  | -2.33518 | -1.45518 |
| C  | -2.87571 | 0.07743  | 0.12307  |
| C  | -3.48791 | -1.20584 | 0.03765  |
| C  | -3.70357 | 1.19162  | 0.42289  |
| C  | -4.85971 | -1.25110 | -0.16936 |
| C  | -5.07258 | 1.06502  | 0.20351  |

|   |          |          |          |
|---|----------|----------|----------|
| C | -5.66659 | -0.12144 | -0.19636 |
| H | -5.31878 | -2.22342 | -0.29894 |
| H | -5.69574 | 1.93267  | 0.37184  |
| C | 2.90718  | 0.53563  | 0.80039  |
| C | 3.58645  | -0.59353 | 1.31491  |
| C | 3.60348  | 1.44537  | -0.03679 |
| C | 4.81380  | -0.93128 | 0.75092  |
| C | 4.82216  | 1.03389  | -0.56156 |
| C | 5.41454  | -0.18053 | -0.24554 |
| H | 5.31232  | -1.82290 | 1.09550  |
| H | 5.34104  | 1.69362  | -1.24272 |
| C | 3.08740  | -1.40973 | 2.52469  |
| C | 3.16928  | 2.90591  | -0.30422 |
| C | 6.70050  | -0.60815 | -0.94514 |
| C | -3.26938 | 2.46995  | 1.17169  |
| C | -2.81741 | -2.55465 | 0.36816  |
| C | -7.14380 | -0.23629 | -0.55122 |
| C | 4.39594  | 3.78597  | -0.58962 |
| H | 4.08214  | 4.83262  | -0.60345 |
| H | 5.16621  | 3.67205  | 0.17665  |
| H | 4.84317  | 3.57814  | -1.56344 |
| C | 2.50613  | 3.51425  | 0.93461  |
| H | 1.55124  | 3.04078  | 1.18714  |
| H | 3.15477  | 3.43653  | 1.81045  |
| H | 2.29271  | 4.57193  | 0.75648  |
| C | 2.23409  | 3.04472  | -1.50779 |
| H | 2.66752  | 2.58652  | -2.39877 |
| H | 1.27367  | 2.56674  | -1.32611 |
| H | 2.05666  | 4.10475  | -1.71574 |
| C | 7.80564  | 0.42140  | -0.68295 |
| H | 8.72723  | 0.12250  | -1.19067 |
| H | 7.53180  | 1.41333  | -1.04806 |
| H | 8.01746  | 0.50374  | 0.38617  |
| C | 7.19348  | -1.97168 | -0.46818 |
| H | 8.09560  | -2.24632 | -1.02050 |
| H | 7.44855  | -1.96516 | 0.59479  |
| H | 6.44849  | -2.75244 | -0.63956 |
| C | 6.43355  | -0.69579 | -2.45288 |
| H | 5.64558  | -1.42148 | -2.66710 |
| H | 6.11909  | 0.26610  | -2.86293 |
| H | 7.34093  | -1.00555 | -2.97948 |
| C | 4.12965  | -2.42708 | 2.99755  |
| H | 5.08361  | -1.95640 | 3.24666  |
| H | 3.75527  | -2.91456 | 3.90085  |
| H | 4.30879  | -3.20973 | 2.25667  |
| C | 2.84535  | -0.45341 | 3.70152  |
| H | 3.75810  | 0.09365  | 3.95053  |
| H | 2.06154  | 0.27663  | 3.48960  |
| H | 2.53582  | -1.02106 | 4.58391  |
| C | 1.81186  | -2.19879 | 2.23030  |
| H | 0.96102  | -1.54722 | 2.02638  |
| H | 1.93726  | -2.85000 | 1.36421  |
| H | 1.54924  | -2.81021 | 3.09918  |
| C | -1.80665 | 2.48180  | 1.59949  |
| H | -1.54909 | 1.57752  | 2.15389  |
| H | -1.09471 | 2.58435  | 0.78343  |
| H | -1.63435 | 3.33166  | 2.26471  |
| C | -4.06720 | 2.46362  | 2.49353  |
| H | -3.76161 | 3.31822  | 3.10338  |
| H | -5.14274 | 2.53498  | 2.33059  |
| H | -3.87061 | 1.55197  | 3.06224  |
| C | -3.62115 | 3.75939  | 0.42347  |
| H | -4.69004 | 3.82090  | 0.21020  |
| H | -3.35980 | 4.62375  | 1.03979  |
| H | -3.09231 | 3.85403  | -0.52483 |
| C | -1.36020 | -2.44124 | 0.79559  |

|    |          |          |          |
|----|----------|----------|----------|
| H  | -1.03828 | -3.39800 | 1.21434  |
| H  | -0.68224 | -2.21764 | -0.02543 |
| H  | -1.24022 | -1.68589 | 1.57605  |
| C  | -2.95156 | -3.58657 | -0.75361 |
| H  | -2.39846 | -3.28051 | -1.64044 |
| H  | -2.54907 | -4.54479 | -0.41424 |
| H  | -3.99439 | -3.74886 | -1.03542 |
| C  | -3.57070 | -3.08615 | 1.60686  |
| H  | -3.51439 | -2.37544 | 2.43528  |
| H  | -4.62355 | -3.28663 | 1.40465  |
| H  | -3.10715 | -4.02189 | 1.93024  |
| C  | -7.84861 | 1.11749  | -0.53832 |
| H  | -7.85707 | 1.56511  | 0.45885  |
| H  | -7.38199 | 1.82357  | -1.22984 |
| H  | -8.88887 | 0.98974  | -0.84675 |
| C  | -7.84817 | -1.15721 | 0.45223  |
| H  | -7.42453 | -2.16331 | 0.44744  |
| H  | -7.76854 | -0.76339 | 1.46845  |
| H  | -8.90927 | -1.24211 | 0.20210  |
| C  | -7.26719 | -0.83143 | -1.95908 |
| H  | -6.78574 | -0.18831 | -2.69967 |
| H  | -6.80383 | -1.81787 | -2.02266 |
| H  | -8.32083 | -0.93648 | -2.23190 |
| Si | 1.12649  | -0.39801 | -2.04988 |
| S  | -1.16725 | -0.98171 | -2.34218 |
| C  | -1.53890 | 1.90868  | -1.69529 |
| H  | -1.45654 | 2.79575  | -1.07529 |
| H  | -0.75904 | 1.92633  | -2.45878 |
| H  | -2.51194 | 1.87714  | -2.18736 |

### E = Ge(II)

R-P=C(Ge(II)Cl)-P(O)ClR

R= H

|    |          |          |          |
|----|----------|----------|----------|
| P  | 0.29435  | 0.56617  | 0.60842  |
| C  | 0.22926  | 0.36855  | -1.03311 |
| P  | -1.12731 | -0.01182 | -2.04410 |
| Ge | 1.31552  | 0.82146  | -2.78519 |
| Cl | 1.83806  | -1.31483 | -3.21569 |
| O  | -0.70661 | 0.61857  | -3.36114 |
| H  | 1.67818  | 0.92075  | 0.70701  |
| H  | -1.34825 | -1.39419 | -2.14827 |
| Cl | -2.93656 | 0.61830  | -1.44062 |

R = Me

|    |          |          |          |
|----|----------|----------|----------|
| P  | 0.55866  | 0.25480  | 0.66466  |
| C  | 0.21676  | 0.15235  | -0.94849 |
| P  | -1.31956 | -0.01921 | -1.73437 |
| Ge | 1.06971  | 0.52876  | -2.83525 |
| Cl | 1.40028  | -1.63920 | -3.35883 |
| O  | -0.98299 | 0.50475  | -3.12946 |
| C  | -1.95133 | -1.68883 | -1.76625 |
| H  | -2.20074 | -2.01365 | -0.75559 |
| H  | -2.83784 | -1.72212 | -2.40166 |
| H  | -1.16423 | -2.31821 | -2.18758 |
| C  | 2.38914  | 0.39865  | 0.71760  |
| H  | 2.80502  | -0.59767 | 0.89858  |
| H  | 2.80907  | 0.79010  | -0.20974 |
| H  | 2.68031  | 1.03306  | 1.55732  |
| Cl | -2.83087 | 1.05683  | -0.92521 |

R = t-Bu

|   |         |          |          |
|---|---------|----------|----------|
| P | 0.76669 | -0.23326 | 0.59292  |
| C | 0.15162 | 0.09962  | -0.90733 |

|    |          |          |          |
|----|----------|----------|----------|
| P  | -1.51485 | -0.12009 | -1.38818 |
| Ge | 0.53203  | 0.98241  | -2.79196 |
| Cl | 1.31611  | -0.87798 | -3.79327 |
| O  | -1.47478 | 0.44185  | -2.80824 |
| C  | -2.24873 | -1.79783 | -1.33161 |
| C  | 2.60300  | 0.11753  | 0.56529  |
| Cl | -2.76130 | 1.02082  | -0.25510 |
| C  | 3.10727  | 0.82901  | -0.67617 |
| H  | 2.61391  | 1.79383  | -0.81922 |
| H  | 4.18159  | 1.02209  | -0.58192 |
| H  | 2.96546  | 0.22179  | -1.57356 |
| C  | 2.87968  | 0.95689  | 1.81564  |
| H  | 2.50027  | 0.47470  | 2.72084  |
| H  | 3.95943  | 1.09152  | 1.93594  |
| H  | 2.42417  | 1.94804  | 1.74489  |
| C  | 3.27642  | -1.25137 | 0.70850  |
| H  | 4.35578  | -1.11488 | 0.83440  |
| H  | 2.90849  | -1.79811 | 1.58164  |
| H  | 3.11583  | -1.87040 | -0.17731 |
| C  | -2.36263 | -2.27996 | 0.11121  |
| H  | -2.74374 | -3.30503 | 0.10553  |
| H  | -1.39402 | -2.28811 | 0.61701  |
| H  | -3.05100 | -1.66626 | 0.69397  |
| C  | -1.32003 | -2.71533 | -2.13080 |
| H  | -1.20225 | -2.37978 | -3.16164 |
| H  | -0.32655 | -2.78163 | -1.68469 |
| H  | -1.75791 | -3.71746 | -2.14124 |
| C  | -3.62203 | -1.73182 | -2.00121 |
| H  | -4.03486 | -2.74369 | -2.04308 |
| H  | -4.31891 | -1.10559 | -1.44180 |
| H  | -3.55141 | -1.35089 | -3.02157 |

**R = Ph**

|    |          |          |          |
|----|----------|----------|----------|
| P  | 0.96480  | -0.20178 | 1.05995  |
| C  | 0.24416  | -0.02245 | -0.42218 |
| P  | -1.44902 | -0.03100 | -0.79238 |
| C  | 2.73767  | -0.10470 | 0.72188  |
| C  | 3.55351  | 0.29590  | 1.78384  |
| C  | 3.32673  | -0.42806 | -0.50417 |
| C  | 4.92316  | 0.41430  | 1.61347  |
| C  | 4.69694  | -0.31946 | -0.66776 |
| C  | 5.49454  | 0.10894  | 0.38636  |
| H  | 5.54615  | 0.73907  | 2.43888  |
| H  | 5.14644  | -0.57701 | -1.61992 |
| Ge | 0.60894  | 0.85576  | -2.29204 |
| Cl | 0.82720  | -1.03784 | -3.49713 |
| O  | -1.46513 | 0.74764  | -2.10474 |
| H  | 2.71454  | -0.80090 | -1.31867 |
| H  | 6.56718  | 0.19293  | 0.25304  |
| H  | 3.10537  | 0.52576  | 2.74583  |
| Cl | -2.59073 | 0.89447  | 0.60369  |
| C  | -2.19443 | -1.64606 | -0.96669 |
| C  | -2.47437 | -2.11028 | -2.24838 |
| C  | -2.44976 | -2.44403 | 0.14705  |
| C  | -3.01966 | -3.37504 | -2.41054 |
| H  | -2.25854 | -1.48528 | -3.10575 |
| C  | -2.98955 | -3.70550 | -0.02552 |
| H  | -2.23143 | -2.07911 | 1.14472  |
| C  | -3.27558 | -4.16948 | -1.30401 |
| H  | -3.24033 | -3.73970 | -3.40675 |
| H  | -3.19037 | -4.32887 | 0.83779  |
| H  | -3.70000 | -5.15835 | -1.43545 |

**R = Mes**

|   |         |         |         |
|---|---------|---------|---------|
| P | 0.84382 | 0.10389 | 1.05317 |
|---|---------|---------|---------|

|   |          |          |          |
|---|----------|----------|----------|
| C | 0.41343  | -0.51604 | -0.42272 |
| P | -1.10285 | -0.47514 | -1.29025 |
| C | 2.68673  | 0.08341  | 0.93951  |
| C | 3.42585  | -1.10253 | 1.17981  |
| C | 3.35259  | 1.25258  | 0.49715  |
| C | 4.74922  | -1.13760 | 0.75935  |
| C | 4.68382  | 1.13176  | 0.09981  |
| C | 5.38772  | -0.05797 | 0.16604  |
| H | 5.31332  | -2.04762 | 0.90484  |
| H | 5.18959  | 2.00533  | -0.27813 |
| C | 2.72498  | 2.66591  | 0.48672  |
| C | 2.88140  | -2.33045 | 1.93939  |
| C | 6.82260  | -0.20096 | -0.33244 |
| C | 2.07444  | -3.25972 | 1.02693  |
| H | 1.18616  | -2.78090 | 0.61941  |
| H | 2.67677  | -3.59380 | 0.18004  |
| H | 1.75982  | -4.14417 | 1.58952  |
| C | 2.03187  | -1.89195 | 3.13489  |
| H | 2.59909  | -1.24064 | 3.80458  |
| H | 1.12088  | -1.35686 | 2.84751  |
| H | 1.70622  | -2.76976 | 3.69955  |
| C | 4.02411  | -3.16821 | 2.52921  |
| H | 4.60030  | -3.68842 | 1.76151  |
| H | 4.70842  | -2.56377 | 3.12966  |
| H | 3.59599  | -3.93689 | 3.17680  |
| C | 1.70095  | 2.85526  | -0.63937 |
| H | 0.79515  | 2.26811  | -0.49245 |
| H | 1.40090  | 3.90602  | -0.68635 |
| H | 2.12827  | 2.58243  | -1.60730 |
| C | 2.07336  | 2.96183  | 1.84356  |
| H | 1.23567  | 2.29787  | 2.06994  |
| H | 2.80218  | 2.87007  | 2.65256  |
| H | 1.68130  | 3.98258  | 1.84956  |
| C | 3.78851  | 3.75225  | 0.28614  |
| H | 4.59118  | 3.68452  | 1.02410  |
| H | 4.22925  | 3.72554  | -0.71298 |
| H | 3.31247  | 4.72872  | 0.40025  |
| C | 7.34974  | 1.08561  | -0.96236 |
| H | 7.38538  | 1.90819  | -0.24341 |
| H | 8.36757  | 0.92267  | -1.32492 |
| H | 6.74130  | 1.39864  | -1.81454 |
| C | 6.87480  | -1.30906 | -1.39114 |
| H | 6.54684  | -2.26940 | -0.98848 |
| H | 6.23259  | -1.06768 | -2.24148 |
| H | 7.89751  | -1.43147 | -1.75883 |
| C | 7.74047  | -0.57382 | 0.83772  |
| H | 7.44344  | -1.51622 | 1.30220  |
| H | 8.77075  | -0.68480 | 0.48791  |
| H | 7.72441  | 0.20034  | 1.60897  |
| C | -2.23563 | -1.87453 | -1.13708 |
| C | -2.62662 | -2.65782 | -2.25634 |
| C | -2.72725 | -2.18330 | 0.14767  |
| C | -3.46443 | -3.73935 | -2.02429 |
| C | -3.56750 | -3.27887 | 0.30028  |
| C | -3.94347 | -4.07520 | -0.76531 |
| H | -3.75852 | -4.34717 | -2.87009 |
| H | -3.94401 | -3.51735 | 1.28944  |
| C | -2.25256 | -2.35347 | -3.69570 |
| C | -3.18654 | -1.28013 | -4.25840 |
| C | -2.23947 | -3.57455 | -4.60766 |
| H | -1.24395 | -1.95174 | -3.70545 |
| H | -3.14879 | -0.36029 | -3.67211 |
| H | -2.90124 | -1.03244 | -5.28391 |
| H | -4.22180 | -1.63426 | -4.26888 |
| H | -1.63508 | -4.38258 | -4.19012 |
| H | -3.24155 | -3.95956 | -4.81691 |



|    |          |          |          |
|----|----------|----------|----------|
| H  | -1.80132 | -3.29398 | -5.56810 |
| C  | -2.42733 | -1.37685 | 1.39494  |
| C  | -1.79191 | -2.23404 | 2.48660  |
| C  | -3.68491 | -0.68008 | 1.91253  |
| H  | -1.70905 | -0.59005 | 1.15615  |
| H  | -0.90185 | -2.74956 | 2.12202  |
| H  | -1.50306 | -1.60797 | 3.33433  |
| H  | -2.48847 | -2.98981 | 2.85712  |
| H  | -4.12955 | -0.04099 | 1.14808  |
| H  | -4.43785 | -1.40861 | 2.22358  |
| H  | -3.44136 | -0.05908 | 2.77825  |
| C  | -4.84905 | -5.26538 | -0.56215 |
| C  | -4.14666 | -6.57082 | -0.92864 |
| C  | -6.16085 | -5.11399 | -1.32867 |
| H  | -5.08932 | -5.30347 | 0.50637  |
| H  | -3.22123 | -6.69702 | -0.36291 |
| H  | -4.79528 | -7.42536 | -0.71964 |
| H  | -3.89363 | -6.59721 | -1.99172 |
| H  | -6.68002 | -4.19400 | -1.05160 |
| H  | -5.98701 | -5.08799 | -2.40755 |
| H  | -6.82431 | -5.95712 | -1.12014 |
| Ge | 1.44748  | -0.62105 | -2.23705 |
| Cl | 1.29913  | -2.85315 | -2.56725 |
| O  | -0.54350 | -0.23626 | -2.69338 |
| Cl | -2.24388 | 1.16925  | -0.85645 |

**R = Mes\***

|    |          |          |          |
|----|----------|----------|----------|
| P  | 1.11140  | 0.90602  | 1.34322  |
| C  | 0.39006  | 0.41172  | -0.06686 |
| P  | -1.27207 | 0.27398  | -0.60259 |
| Cl | 1.60635  | -2.51048 | -1.13673 |
| O  | -1.06922 | -0.76619 | -1.70456 |
| C  | -2.88804 | -0.00358 | 0.19870  |
| C  | -3.46312 | -1.29578 | 0.01482  |
| C  | -3.73935 | 1.07787  | 0.54177  |
| C  | -4.82968 | -1.35621 | -0.21287 |
| C  | -5.10379 | 0.92471  | 0.31734  |
| C  | -5.66475 | -0.24798 | -0.15996 |
| H  | -5.26362 | -2.32396 | -0.42766 |
| H  | -5.74889 | 1.76515  | 0.53163  |
| C  | 2.89031  | 0.64466  | 0.94596  |
| C  | 3.55413  | -0.47636 | 1.49778  |
| C  | 3.55106  | 1.45145  | -0.01140 |
| C  | 4.72962  | -0.90260 | 0.88600  |
| C  | 4.71415  | 0.95007  | -0.58429 |
| C  | 5.28930  | -0.25345 | -0.20316 |
| H  | 5.21730  | -1.78660 | 1.26400  |
| H  | 5.20077  | 1.53061  | -1.35659 |
| C  | 3.08276  | -1.19940 | 2.77586  |
| C  | 3.14277  | 2.89173  | -0.39330 |
| C  | 6.51525  | -0.78169 | -0.94147 |
| C  | -3.34103 | 2.35156  | 1.31371  |
| C  | -2.74104 | -2.64525 | 0.20011  |
| C  | -7.13774 | -0.37707 | -0.52710 |
| C  | 4.40636  | 3.74745  | -0.58883 |
| H  | 4.11353  | 4.79391  | -0.70437 |
| H  | 5.07833  | 3.67353  | 0.26939  |
| H  | 4.96526  | 3.47588  | -1.48526 |
| C  | 2.34837  | 3.58521  | 0.71381  |
| H  | 1.34425  | 3.16978  | 0.84817  |
| H  | 2.86789  | 3.53661  | 1.67387  |
| H  | 2.20514  | 4.63812  | 0.45599  |
| C  | 2.34346  | 2.93900  | -1.69831 |
| H  | 2.87731  | 2.43163  | -2.50503 |
| H  | 1.36609  | 2.46885  | -1.59093 |
| H  | 2.18346  | 3.97888  | -1.99945 |

|    |          |          |          |
|----|----------|----------|----------|
| C  | 7.66466  | 0.22660  | -0.83025 |
| H  | 8.54386  | -0.14388 | -1.36505 |
| H  | 7.39872  | 1.19513  | -1.25859 |
| H  | 7.94423  | 0.38694  | 0.21410  |
| C  | 6.99574  | -2.11910 | -0.38432 |
| H  | 7.85425  | -2.46722 | -0.96390 |
| H  | 7.31510  | -2.03660 | 0.65784  |
| H  | 6.21948  | -2.88546 | -0.44816 |
| C  | 6.15337  | -0.98079 | -2.41844 |
| H  | 5.33399  | -1.69548 | -2.52558 |
| H  | 5.84334  | -0.04473 | -2.88760 |
| H  | 7.01718  | -1.36229 | -2.97039 |
| C  | 4.10690  | -2.23172 | 3.25573  |
| H  | 5.09068  | -1.78844 | 3.42690  |
| H  | 3.76257  | -2.64929 | 4.20470  |
| H  | 4.21468  | -3.06290 | 2.55502  |
| C  | 2.93389  | -0.17180 | 3.90671  |
| H  | 3.87956  | 0.34525  | 4.08742  |
| H  | 2.17388  | 0.58117  | 3.68871  |
| H  | 2.63894  | -0.67698 | 4.83094  |
| C  | 1.76490  | -1.95441 | 2.58248  |
| H  | 0.91807  | -1.28367 | 2.41950  |
| H  | 1.81584  | -2.62985 | 1.72732  |
| H  | 1.54130  | -2.53668 | 3.48155  |
| C  | -1.86575 | 2.43750  | 1.67728  |
| H  | -1.51805 | 1.52380  | 2.16435  |
| H  | -1.22657 | 2.64990  | 0.82227  |
| H  | -1.71826 | 3.25413  | 2.38851  |
| C  | -4.09549 | 2.27280  | 2.65725  |
| H  | -3.82648 | 3.13557  | 3.27273  |
| H  | -5.17811 | 2.27695  | 2.52746  |
| H  | -3.82434 | 1.36675  | 3.20451  |
| C  | -3.76292 | 3.63748  | 0.59737  |
| H  | -4.83613 | 3.66305  | 0.39999  |
| H  | -3.52448 | 4.49920  | 1.22680  |
| H  | -3.24108 | 3.75639  | -0.35176 |
| C  | -1.40201 | -2.49996 | 0.91763  |
| H  | -1.01941 | -3.49239 | 1.16785  |
| H  | -0.62772 | -2.03308 | 0.31515  |
| H  | -1.51801 | -1.94308 | 1.85147  |
| C  | -2.57558 | -3.40811 | -1.11700 |
| H  | -1.92694 | -2.87476 | -1.80774 |
| H  | -2.13832 | -4.39041 | -0.91848 |
| H  | -3.54422 | -3.56451 | -1.59932 |
| C  | -3.60883 | -3.50599 | 1.14112  |
| H  | -3.82560 | -2.98178 | 2.07516  |
| H  | -4.55524 | -3.81026 | 0.69312  |
| H  | -3.05932 | -4.41879 | 1.38394  |
| C  | -7.87875 | 0.95328  | -0.42369 |
| H  | -7.89884 | 1.33186  | 0.60149  |
| H  | -7.43151 | 1.71674  | -1.06511 |
| H  | -8.91523 | 0.81831  | -0.74168 |
| C  | -7.81786 | -1.38353 | 0.40870  |
| H  | -7.36478 | -2.37426 | 0.33875  |
| H  | -7.75261 | -1.05683 | 1.44946  |
| H  | -8.87538 | -1.48150 | 0.14834  |
| C  | -7.24247 | -0.87667 | -1.97315 |
| H  | -6.77494 | -0.17230 | -2.66525 |
| H  | -6.75539 | -1.84506 | -2.10271 |
| H  | -8.29262 | -0.98826 | -2.25660 |
| Ge | 0.99697  | -0.47808 | -1.89424 |
| Cl | -1.61783 | 2.01492  | -1.64698 |

**R-P=C(Ge(II)Cl)-P(O)MeR****R = H**

|    |          |          |          |
|----|----------|----------|----------|
| P  | 0.42553  | 0.80794  | 0.52687  |
| C  | 0.27561  | 0.49788  | -1.09096 |
| P  | -1.16129 | 0.18374  | -2.03701 |
| Ge | 1.35703  | 0.63861  | -2.89398 |
| Cl | 1.65054  | -1.58609 | -3.04703 |
| O  | -0.65133 | 0.57819  | -3.42832 |
| C  | -2.67034 | 1.03509  | -1.58428 |
| H  | -2.49104 | 2.11083  | -1.58887 |
| H  | -3.45664 | 0.79212  | -2.30183 |
| H  | -2.97833 | 0.71902  | -0.58472 |
| H  | 1.83500  | 1.06083  | 0.56413  |
| H  | -1.49154 | -1.18469 | -1.96574 |

**R = Me**

|    |          |          |          |
|----|----------|----------|----------|
| P  | 0.50824  | 0.33422  | 0.55788  |
| C  | 0.21045  | 0.19946  | -1.06025 |
| P  | -1.32547 | 0.03277  | -1.88083 |
| Ge | 1.12626  | 0.44209  | -2.93744 |
| Cl | 1.46983  | -1.76914 | -3.27026 |
| O  | -0.88610 | 0.40847  | -3.31029 |
| C  | -2.64057 | 1.11271  | -1.30574 |
| H  | -2.29502 | 2.14581  | -1.35222 |
| H  | -3.51944 | 0.99613  | -1.94347 |
| H  | -2.90167 | 0.86488  | -0.27476 |
| C  | -1.95287 | -1.64512 | -1.80514 |
| H  | -2.23670 | -1.89575 | -0.78116 |
| H  | -2.81836 | -1.74211 | -2.46426 |
| H  | -1.15879 | -2.31251 | -2.14363 |
| C  | 2.33665  | 0.49092  | 0.67556  |
| H  | 2.74774  | -0.48402 | 0.95542  |
| H  | 2.79091  | 0.80790  | -0.26379 |
| H  | 2.59287  | 1.19424  | 1.47104  |

**R = t-Bu**

|    |          |          |          |
|----|----------|----------|----------|
| P  | 0.69725  | -0.19789 | 0.50722  |
| C  | 0.16785  | 0.10469  | -1.02985 |
| P  | -1.49740 | -0.04862 | -1.58118 |
| Ge | 0.66012  | 0.91305  | -2.92316 |
| Cl | 1.47173  | -0.99240 | -3.82575 |
| O  | -1.32622 | 0.44019  | -3.03630 |
| C  | -2.22935 | -1.73207 | -1.53304 |
| C  | 2.54264  | 0.11116  | 0.58081  |
| C  | 3.13205  | 0.76262  | -0.65614 |
| H  | 2.67234  | 1.73261  | -0.86180 |
| H  | 4.20487  | 0.93191  | -0.51065 |
| H  | 3.01989  | 0.12700  | -1.53774 |
| C  | 2.76830  | 0.99228  | 1.81174  |
| H  | 2.32497  | 0.55487  | 2.71080  |
| H  | 3.84221  | 1.10798  | 1.99104  |
| H  | 2.34207  | 1.98985  | 1.67631  |
| C  | 3.17680  | -1.26361 | 0.81313  |
| H  | 4.25058  | -1.14578 | 0.99461  |
| H  | 2.74737  | -1.76873 | 1.68329  |
| H  | 3.05104  | -1.91272 | -0.05665 |
| C  | -2.49683 | -2.14143 | -0.08618 |
| H  | -2.85679 | -3.17424 | -0.07183 |
| H  | -1.59096 | -2.09862 | 0.52445  |
| H  | -3.26188 | -1.52056 | 0.38524  |
| C  | -1.25128 | -2.70737 | -2.18586 |
| H  | -1.01525 | -2.42036 | -3.21117 |
| H  | -0.31182 | -2.76909 | -1.63458 |
| H  | -1.70665 | -3.70204 | -2.20052 |

|   |          |          |          |
|---|----------|----------|----------|
| C | -3.53129 | -1.69476 | -2.33704 |
| H | -3.94361 | -2.70675 | -2.38667 |
| H | -4.28738 | -1.05586 | -1.87476 |
| H | -3.35915 | -1.34839 | -3.35779 |
| C | -2.59737 | 1.06130  | -0.68364 |
| H | -2.18933 | 2.06902  | -0.77358 |
| H | -3.59915 | 1.04436  | -1.11566 |
| H | -2.64107 | 0.78952  | 0.37175  |

**R = Ph**

|    |          |          |          |
|----|----------|----------|----------|
| P  | 0.85677  | -0.02478 | 0.77304  |
| C  | 0.24094  | 0.01495  | -0.76362 |
| P  | -1.44603 | 0.00864  | -1.22452 |
| C  | 2.65477  | 0.02984  | 0.56724  |
| C  | 3.39738  | 0.53772  | 1.63608  |
| C  | 3.32567  | -0.42930 | -0.56938 |
| C  | 4.77777  | 0.62633  | 1.55582  |
| C  | 4.70596  | -0.34937 | -0.64248 |
| C  | 5.43223  | 0.18485  | 0.41468  |
| H  | 5.34414  | 1.03431  | 2.38524  |
| H  | 5.21873  | -0.71198 | -1.52607 |
| Ge | 0.72951  | 0.61912  | -2.71241 |
| Cl | 0.99670  | -1.44284 | -3.59928 |
| O  | -1.32683 | 0.56913  | -2.65393 |
| H  | 2.76733  | -0.88151 | -1.38243 |
| H  | 6.51292  | 0.24569  | 0.35250  |
| H  | 2.88444  | 0.87417  | 2.53218  |
| C  | -2.17241 | -1.63412 | -1.23901 |
| C  | -2.48592 | -2.22283 | -2.45973 |
| C  | -2.41425 | -2.31920 | -0.04950 |
| C  | -3.05269 | -3.48849 | -2.48651 |
| H  | -2.27287 | -1.69002 | -3.37840 |
| C  | -2.97842 | -3.58260 | -0.08321 |
| H  | -2.14772 | -1.87704 | 0.90538  |
| C  | -3.30025 | -4.16559 | -1.30242 |
| H  | -3.29404 | -3.94854 | -3.43759 |
| H  | -3.16316 | -4.11662 | 0.84161  |
| H  | -3.73987 | -5.15626 | -1.32705 |
| C  | -2.51795 | 1.03392  | -0.21026 |
| H  | -2.11230 | 2.04614  | -0.18629 |
| H  | -3.52087 | 1.04662  | -0.64109 |
| H  | -2.56470 | 0.64005  | 0.80680  |

**R = Mes**

|    |          |          |          |
|----|----------|----------|----------|
| P  | 1.06709  | -0.48152 | 1.16641  |
| C  | 0.27967  | -0.21897 | -0.26477 |
| P  | -1.41603 | -0.11249 | -0.72644 |
| C  | 2.81144  | -0.11343 | 0.75178  |
| C  | 3.36803  | 1.10499  | 1.16451  |
| C  | 3.61058  | -1.07771 | 0.11912  |
| C  | 4.71173  | 1.35225  | 0.91397  |
| C  | 4.95031  | -0.78786 | -0.10831 |
| C  | 5.51895  | 0.42117  | 0.27327  |
| H  | 5.13927  | 2.29926  | 1.23113  |
| H  | 5.56999  | -1.53522 | -0.59561 |
| Ge | 0.81069  | 0.81601  | -1.99622 |
| Cl | 0.96005  | -1.01004 | -3.33603 |
| O  | -1.23573 | 0.85355  | -1.91588 |
| C  | -2.20493 | -1.67504 | -1.18876 |
| C  | -2.83492 | -1.83126 | -2.44367 |
| C  | -2.22667 | -2.73286 | -0.26034 |
| C  | -3.45134 | -3.04474 | -2.72356 |
| C  | -2.86296 | -3.92093 | -0.59796 |
| C  | -3.47446 | -4.10348 | -1.82714 |
| H  | -3.93817 | -3.16005 | -3.68707 |

|   |          |          |          |
|---|----------|----------|----------|
| H | -2.87687 | -4.72675 | 0.12985  |
| C | -2.50341 | 0.69251  | 0.46599  |
| H | -2.03160 | 1.62096  | 0.79095  |
| H | -3.44339 | 0.92250  | -0.04079 |
| H | -2.71082 | 0.06250  | 1.33009  |
| C | 2.53072  | 2.14954  | 1.84120  |
| H | 1.84856  | 2.62799  | 1.13154  |
| H | 1.91417  | 1.72109  | 2.63836  |
| H | 3.15543  | 2.92846  | 2.28068  |
| C | 3.05370  | -2.40225 | -0.31070 |
| H | 2.48459  | -2.87872 | 0.49417  |
| H | 2.37706  | -2.29100 | -1.16271 |
| H | 3.85558  | -3.08216 | -0.60170 |
| C | 6.95837  | 0.71873  | -0.01679 |
| H | 7.56689  | -0.18707 | 0.01526  |
| H | 7.07051  | 1.15134  | -1.01600 |
| H | 7.36963  | 1.43429  | 0.69750  |
| C | -2.89038 | -0.77982 | -3.51441 |
| H | -3.27106 | 0.17408  | -3.14975 |
| H | -1.89723 | -0.58395 | -3.92137 |
| H | -3.53571 | -1.12252 | -4.32402 |
| C | -1.56352 | -2.67999 | 1.08444  |
| H | -0.51256 | -2.97159 | 1.00763  |
| H | -1.57610 | -1.69625 | 1.55260  |
| H | -2.04964 | -3.37565 | 1.77013  |
| C | -4.12440 | -5.40293 | -2.18709 |
| H | -3.44552 | -6.01892 | -2.78494 |
| H | -4.39203 | -5.97574 | -1.29784 |
| H | -5.02666 | -5.24529 | -2.78126 |

**R = Mes\***

|    |          |          |          |
|----|----------|----------|----------|
| P  | 1.09169  | 1.08510  | 1.19825  |
| C  | 0.34967  | 0.46462  | -0.14751 |
| P  | -1.32367 | 0.34806  | -0.71278 |
| Cl | 1.53612  | -2.56875 | -1.00209 |
| O  | -1.09906 | -0.80982 | -1.71793 |
| C  | -2.92453 | 0.07361  | 0.14749  |
| C  | -3.50850 | -1.22123 | 0.04219  |
| C  | -3.77999 | 1.17208  | 0.42238  |
| C  | -4.87666 | -1.29410 | -0.18188 |
| C  | -5.14608 | 1.01335  | 0.20663  |
| C  | -5.71131 | -0.18510 | -0.19672 |
| H  | -5.31089 | -2.27299 | -0.33860 |
| H  | -5.78958 | 1.86607  | 0.37375  |
| C  | 2.87082  | 0.74349  | 0.84486  |
| C  | 3.49758  | -0.34750 | 1.49036  |
| C  | 3.57616  | 1.46991  | -0.14704 |
| C  | 4.67828  | -0.84060 | 0.93995  |
| C  | 4.74700  | 0.91169  | -0.64577 |
| C  | 5.28345  | -0.27685 | -0.17061 |
| H  | 5.13428  | -1.70801 | 1.38912  |
| H  | 5.27261  | 1.43004  | -1.43568 |
| C  | 2.99032  | -0.96424 | 2.81079  |
| C  | 3.19786  | 2.88702  | -0.63609 |
| C  | 6.51741  | -0.87732 | -0.83666 |
| C  | -3.37694 | 2.48399  | 1.12690  |
| C  | -2.78862 | -2.55828 | 0.30336  |
| C  | -7.18638 | -0.33498 | -0.54906 |
| C  | 4.45430  | 3.65564  | -1.07382 |
| H  | 4.18549  | 4.69981  | -1.25141 |
| H  | 5.23285  | 3.63036  | -0.30793 |
| H  | 4.87528  | 3.27564  | -2.00644 |
| C  | 2.57865  | 3.71644  | 0.49151  |
| H  | 1.60581  | 3.33686  | 0.82155  |
| H  | 3.23415  | 3.75123  | 1.36491  |
| H  | 2.41057  | 4.74029  | 0.14595  |

|    |          |          |          |
|----|----------|----------|----------|
| C  | 2.24621  | 2.86461  | -1.83590 |
| H  | 2.64870  | 2.25210  | -2.64578 |
| H  | 1.27142  | 2.46414  | -1.56263 |
| H  | 2.10445  | 3.88147  | -2.21529 |
| C  | 7.68605  | 0.11173  | -0.75782 |
| H  | 8.57121  | -0.31111 | -1.24167 |
| H  | 7.45402  | 1.05547  | -1.25568 |
| H  | 7.94007  | 0.33415  | 0.28169  |
| C  | 6.95186  | -2.18506 | -0.18017 |
| H  | 7.81765  | -2.58870 | -0.71097 |
| H  | 7.24428  | -2.04091 | 0.86319  |
| H  | 6.16005  | -2.93718 | -0.21606 |
| C  | 6.19296  | -1.16536 | -2.30770 |
| H  | 5.35999  | -1.86722 | -2.39238 |
| H  | 5.91833  | -0.25541 | -2.84537 |
| H  | 7.06271  | -1.60105 | -2.80794 |
| C  | 3.98461  | -1.97896 | 3.38313  |
| H  | 4.97552  | -1.54525 | 3.53702  |
| H  | 3.61672  | -2.31643 | 4.35489  |
| H  | 4.08385  | -2.86278 | 2.74864  |
| C  | 2.85055  | 0.14831  | 3.85963  |
| H  | 3.80550  | 0.65648  | 4.01552  |
| H  | 2.11120  | 0.89936  | 3.57415  |
| H  | 2.53171  | -0.27989 | 4.81440  |
| C  | 1.65874  | -1.70396 | 2.65745  |
| H  | 0.82820  | -1.03027 | 2.43831  |
| H  | 1.70356  | -2.43921 | 1.85275  |
| H  | 1.41667  | -2.21727 | 3.59309  |
| C  | -1.90401 | 2.57188  | 1.50267  |
| H  | -1.57893 | 1.68605  | 2.05179  |
| H  | -1.23364 | 2.71033  | 0.65631  |
| H  | -1.74981 | 3.43230  | 2.15852  |
| C  | -4.13802 | 2.48863  | 2.46896  |
| H  | -3.86399 | 3.38081  | 3.03884  |
| H  | -5.21970 | 2.49538  | 2.33242  |
| H  | -3.87836 | 1.61079  | 3.06506  |
| C  | -3.79143 | 3.73443  | 0.34503  |
| H  | -4.86780 | 3.76303  | 0.16645  |
| H  | -3.53003 | 4.62869  | 0.91717  |
| H  | -3.29720 | 3.80258  | -0.62490 |
| C  | -1.45345 | -2.36656 | 1.01513  |
| H  | -1.05381 | -3.34241 | 1.30116  |
| H  | -0.69027 | -1.90513 | 0.39569  |
| H  | -1.58096 | -1.77709 | 1.92723  |
| C  | -2.61906 | -3.39248 | -0.96929 |
| H  | -1.97068 | -2.89527 | -1.68647 |
| H  | -2.17939 | -4.36115 | -0.71630 |
| H  | -3.58727 | -3.57823 | -1.44261 |
| C  | -3.65738 | -3.36799 | 1.28745  |
| H  | -3.88377 | -2.79183 | 2.18810  |
| H  | -4.59880 | -3.70520 | 0.85213  |
| H  | -3.10331 | -4.26109 | 1.58682  |
| C  | -7.92576 | 1.00009  | -0.52450 |
| H  | -7.94027 | 1.44135  | 0.47541  |
| H  | -7.48104 | 1.72225  | -1.21392 |
| H  | -8.96407 | 0.84753  | -0.82839 |
| C  | -7.86354 | -1.28030 | 0.45041  |
| H  | -7.41129 | -2.27376 | 0.44013  |
| H  | -7.79239 | -0.88965 | 1.46849  |
| H  | -8.92252 | -1.39321 | 0.20207  |
| C  | -7.30052 | -0.92323 | -1.96048 |
| H  | -6.83938 | -0.26228 | -2.69841 |
| H  | -6.81232 | -1.89695 | -2.03330 |
| H  | -8.35225 | -1.05373 | -2.22986 |
| Ge | 0.93510  | -0.58619 | -1.89034 |
| C  | -1.64986 | 1.77733  | -1.77831 |

|   |          |         |          |
|---|----------|---------|----------|
| H | -2.58594 | 1.59086 | -2.30778 |
| H | -1.70044 | 2.73244 | -1.26583 |
| H | -0.83454 | 1.80223 | -2.50506 |

|   |          |          |          |
|---|----------|----------|----------|
| H | -0.25797 | -2.56793 | -2.05008 |
| H | -1.66457 | -3.57156 | -2.43800 |

**R-P=C(Ge(II)Cl)-P(S)ClR**

**R= H**

|    |          |          |          |
|----|----------|----------|----------|
| P  | 0.18249  | 0.84541  | 0.54154  |
| C  | 0.17159  | 0.39415  | -1.05207 |
| P  | -1.17688 | -0.12328 | -2.01041 |
| Ge | 1.47816  | 0.64897  | -2.66504 |
| S  | -0.82260 | 0.74149  | -3.75590 |
| Cl | 1.85163  | -1.55080 | -2.95280 |
| H  | 1.56470  | 1.21442  | 0.61550  |
| Cl | -3.02618 | 0.19711  | -1.24832 |
| H  | -1.17824 | -1.52544 | -2.08391 |

**R= Me**

|    |          |          |          |
|----|----------|----------|----------|
| P  | 0.51829  | 0.36678  | 0.61726  |
| C  | 0.18402  | 0.16405  | -0.99175 |
| P  | -1.38282 | -0.00282 | -1.71547 |
| Ge | 1.25233  | 0.41866  | -2.76702 |
| S  | -1.10738 | 0.81841  | -3.50957 |
| Cl | 1.43021  | -1.77866 | -3.26651 |
| C  | -1.89567 | -1.72109 | -1.79709 |
| H  | -1.10135 | -2.26898 | -2.30896 |
| H  | -2.03689 | -2.10544 | -0.78582 |
| H  | -2.82642 | -1.78647 | -2.36201 |
| C  | 2.35229  | 0.43538  | 0.68237  |
| H  | 2.72165  | -0.55644 | 0.96147  |
| H  | 2.80523  | 0.72313  | -0.26788 |
| H  | 2.65892  | 1.13210  | 1.46528  |
| Cl | -2.90605 | 0.86941  | -0.67534 |

**R= t-Bu**

|    |          |          |          |
|----|----------|----------|----------|
| P  | 0.66956  | -0.10529 | 0.57230  |
| C  | 0.11335  | 0.18396  | -0.96630 |
| P  | -1.58255 | -0.02290 | -1.36046 |
| Ge | 0.72381  | 1.10415  | -2.74855 |
| S  | -1.75448 | 0.90799  | -3.11457 |
| Cl | 1.43754  | -0.75248 | -3.82169 |
| C  | -2.19181 | -1.77497 | -1.40708 |
| C  | 2.52747  | 0.09277  | 0.61783  |
| Cl | -2.79295 | 0.85018  | 0.04185  |
| C  | 2.81742  | 0.92611  | 1.86935  |
| H  | 3.89782  | 0.96475  | 2.04140  |
| H  | 2.45809  | 1.95281  | 1.76218  |
| H  | 2.35194  | 0.49670  | 2.76077  |
| C  | 3.06520  | -1.32900 | 0.81614  |
| H  | 4.14411  | -1.28556 | 0.99967  |
| H  | 2.60419  | -1.82530 | 1.67519  |
| H  | 2.89802  | -1.94681 | -0.06922 |
| C  | 3.16270  | 0.73085  | -0.60330 |
| H  | 2.77980  | 1.73864  | -0.78157 |
| H  | 4.24489  | 0.81607  | -0.45339 |
| H  | 3.00977  | 0.12756  | -1.50158 |
| C  | -2.11892 | -2.39564 | -0.01601 |
| H  | -2.44229 | -3.43793 | -0.08968 |
| H  | -1.10203 | -2.39078 | 0.38191  |
| H  | -2.77095 | -1.88830 | 0.69584  |
| C  | -3.63121 | -1.75900 | -1.91768 |
| H  | -3.97511 | -2.79320 | -2.00735 |
| H  | -4.30275 | -1.23767 | -1.23361 |
| H  | -3.70315 | -1.29434 | -2.90302 |
| C  | -1.29760 | -2.54282 | -2.37908 |
| H  | -1.31963 | -2.11282 | -3.38104 |

**R= Ph**

|    |          |          |          |
|----|----------|----------|----------|
| P  | 0.85068  | 0.02553  | 1.03352  |
| C  | 0.18133  | 0.06215  | -0.48649 |
| P  | -1.51466 | 0.06577  | -0.84678 |
| C  | 2.63404  | -0.02257 | 0.73944  |
| C  | 3.44737  | 0.54573  | 1.72394  |
| C  | 3.23076  | -0.61573 | -0.37742 |
| C  | 4.82430  | 0.56278  | 1.57506  |
| C  | 4.60858  | -0.60641 | -0.51735 |
| C  | 5.40479  | -0.01105 | 0.45245  |
| H  | 5.44604  | 1.01818  | 2.33725  |
| H  | 5.06299  | -1.07149 | -1.38458 |
| C  | -2.16575 | -1.60266 | -1.03593 |
| C  | -2.57424 | -2.05427 | -2.28435 |
| C  | -2.21966 | -2.44565 | 0.07300  |
| C  | -3.04790 | -3.35078 | -2.42086 |
| C  | -2.69156 | -3.73726 | -0.07254 |
| C  | -3.10705 | -4.18920 | -1.31939 |
| H  | -3.36540 | -3.70510 | -3.39435 |
| H  | -2.73544 | -4.39445 | 0.78798  |
| Ge | 0.86082  | 0.68615  | -2.35472 |
| S  | -1.61839 | 1.16217  | -2.50212 |
| Cl | 0.88704  | -1.32564 | -3.38360 |
| H  | -3.47561 | -5.20266 | -1.43007 |
| H  | -2.51076 | -1.39529 | -3.14154 |
| H  | -1.89659 | -2.09334 | 1.04652  |
| H  | 2.99285  | 0.98613  | 2.60624  |
| H  | 2.61879  | -1.11937 | -1.11870 |
| H  | 6.48288  | -0.00568 | 0.33831  |
| Cl | -2.65577 | 0.83149  | 0.66556  |

**R= Mes**

|    |          |          |          |
|----|----------|----------|----------|
| P  | 0.93354  | -0.14691 | 1.19103  |
| C  | 0.19540  | -0.11595 | -0.29451 |
| P  | -1.49080 | -0.02520 | -0.73209 |
| C  | 2.70094  | 0.03572  | 0.75876  |
| C  | 3.33117  | 1.26029  | 1.02497  |
| C  | 3.44273  | -1.05108 | 0.26937  |
| C  | 4.69053  | 1.38748  | 0.77209  |
| C  | 4.80100  | -0.87722 | 0.03465  |
| C  | 5.44252  | 0.33259  | 0.27104  |
| H  | 5.17505  | 2.33842  | 0.97420  |
| H  | 5.37708  | -1.71833 | -0.34006 |
| C  | -2.20474 | -1.62129 | -1.21769 |
| C  | -2.86075 | -1.82256 | -2.45359 |
| C  | -2.08495 | -2.69451 | -0.30625 |
| C  | -3.32815 | -3.09702 | -2.74935 |
| C  | -2.57718 | -3.94167 | -0.66748 |
| C  | -3.18751 | -4.17367 | -1.88820 |
| H  | -3.83220 | -3.24536 | -3.69896 |
| H  | -2.48239 | -4.75636 | 0.04378  |
| Ge | 1.01754  | 0.64863  | -2.04513 |
| S  | -1.35878 | 1.43984  | -2.08469 |
| Cl | 0.80354  | -1.22313 | -3.30916 |
| C  | 2.81178  | -2.38643 | 0.00517  |
| H  | 2.22180  | -2.72718 | 0.86197  |
| H  | 2.14007  | -2.35096 | -0.85720 |
| H  | 3.57517  | -3.13942 | -0.19459 |
| C  | 2.55311  | 2.43339  | 1.54202  |
| H  | 1.90885  | 2.85390  | 0.76353  |
| H  | 1.90181  | 2.15301  | 2.37653  |
| H  | 3.21974  | 3.22487  | 1.88697  |

|    |          |          |          |
|----|----------|----------|----------|
| C  | 6.90136  | 0.49904  | -0.02523 |
| H  | 7.05152  | 0.80729  | -1.06472 |
| H  | 7.35294  | 1.26255  | 0.61064  |
| H  | 7.44665  | -0.43550 | 0.11898  |
| C  | -1.45280 | -2.60055 | 1.05041  |
| H  | -0.36790 | -2.71291 | 0.98294  |
| H  | -1.65210 | -1.65995 | 1.56114  |
| H  | -1.82840 | -3.40488 | 1.68411  |
| C  | -3.11422 | -0.77199 | -3.49362 |
| H  | -3.60105 | 0.11406  | -3.08653 |
| H  | -2.18496 | -0.44387 | -3.96171 |
| H  | -3.75919 | -1.18614 | -4.26927 |
| C  | -3.67315 | -5.53647 | -2.26873 |
| H  | -3.89611 | -6.14147 | -1.38850 |
| H  | -4.57021 | -5.48125 | -2.88804 |
| H  | -2.90952 | -6.06550 | -2.84746 |
| Cl | -2.73151 | 0.61792  | 0.78131  |

**R = Mes\***

|    |          |          |          |
|----|----------|----------|----------|
| P  | 1.04478  | 0.72566  | 1.35970  |
| C  | 0.38535  | 0.30895  | -0.11085 |
| P  | -1.28886 | 0.28486  | -0.62922 |
| Cl | 1.89127  | -2.42350 | -1.22625 |
| C  | -2.88835 | 0.01936  | 0.24012  |
| C  | -3.46869 | -1.27577 | 0.09276  |
| C  | -3.74115 | 1.10451  | 0.57303  |
| C  | -4.83235 | -1.33870 | -0.15031 |
| C  | -5.10064 | 0.95631  | 0.31367  |
| C  | -5.65899 | -0.22212 | -0.15406 |
| H  | -5.27038 | -2.31364 | -0.32476 |
| H  | -5.74513 | 1.80366  | 0.50240  |
| C  | 2.84283  | 0.57559  | 1.00175  |
| C  | 3.55718  | -0.52800 | 1.53159  |
| C  | 3.47681  | 1.43522  | 0.07397  |
| C  | 4.75496  | -0.88267 | 0.92134  |
| C  | 4.66421  | 0.99879  | -0.50626 |
| C  | 5.29071  | -0.18470 | -0.15180 |
| H  | 5.27967  | -1.75262 | 1.28188  |
| H  | 5.12536  | 1.62444  | -1.26092 |
| C  | 3.10304  | -1.31171 | 2.77834  |
| C  | 3.08156  | 2.89483  | -0.24229 |
| C  | 6.53610  | -0.64696 | -0.90109 |
| C  | -3.35824 | 2.35179  | 1.39702  |
| C  | -2.78055 | -2.62175 | 0.40516  |
| C  | -7.12224 | -0.34753 | -0.55804 |
| C  | 4.27941  | 3.77405  | 0.16541  |
| H  | 4.04353  | 4.82516  | -0.02250 |
| H  | 4.50154  | 3.65893  | 1.22936  |
| H  | 5.18414  | 3.53118  | -0.39220 |
| C  | 1.88817  | 3.43527  | 0.54173  |
| H  | 0.93756  | 3.03992  | 0.18532  |
| H  | 1.97902  | 3.24216  | 1.61538  |
| H  | 1.84466  | 4.52109  | 0.41622  |
| C  | 2.80518  | 3.09904  | -1.73422 |
| H  | 3.64989  | 2.79044  | -2.35280 |
| H  | 1.93165  | 2.52985  | -2.05809 |
| H  | 2.61339  | 4.15716  | -1.93468 |
| C  | 7.64028  | 0.40965  | -0.78277 |
| H  | 8.53270  | 0.08345  | -1.32438 |
| H  | 7.33131  | 1.36968  | -1.20133 |
| H  | 7.91669  | 0.57186  | 0.26214  |
| C  | 7.07843  | -1.96874 | -0.36392 |
| H  | 7.95022  | -2.26914 | -0.95030 |
| H  | 7.39650  | -1.88659 | 0.67873  |
| H  | 6.33760  | -2.76849 | -0.43757 |
| C  | 6.17287  | -0.84271 | -2.37830 |

|    |          |          |          |
|----|----------|----------|----------|
| H  | 5.38340  | -1.58970 | -2.48888 |
| H  | 5.81912  | 0.08523  | -2.83252 |
| H  | 7.04859  | -1.17948 | -2.94056 |
| C  | 4.17491  | -2.29638 | 3.25367  |
| H  | 5.12834  | -1.80229 | 3.45505  |
| H  | 3.83709  | -2.75666 | 4.18510  |
| H  | 4.34324  | -3.10227 | 2.53565  |
| C  | 2.86772  | -0.32846 | 3.93358  |
| H  | 3.77647  | 0.23820  | 4.15124  |
| H  | 2.06871  | 0.38391  | 3.71890  |
| H  | 2.58344  | -0.87714 | 4.83607  |
| C  | 1.83647  | -2.13328 | 2.52745  |
| H  | 0.96138  | -1.50280 | 2.35314  |
| H  | 1.94912  | -2.78221 | 1.65771  |
| H  | 1.61663  | -2.74862 | 3.40525  |
| C  | -1.89882 | 2.40216  | 1.82860  |
| H  | -1.59081 | 1.46870  | 2.30419  |
| H  | -1.21591 | 2.62205  | 1.01169  |
| H  | -1.77136 | 3.19776  | 2.56713  |
| C  | -4.16648 | 2.22847  | 2.70720  |
| H  | -3.90352 | 3.05750  | 3.36986  |
| H  | -5.24294 | 2.26219  | 2.53711  |
| H  | -3.93437 | 1.29375  | 3.22321  |
| C  | -3.74676 | 3.66952  | 0.72201  |
| H  | -4.80989 | 3.70357  | 0.47620  |
| H  | -3.54126 | 4.50000  | 1.40288  |
| H  | -3.18230 | 3.83587  | -0.19442 |
| C  | -1.33573 | -2.50086 | 0.87405  |
| H  | -1.01577 | -3.46301 | 1.28201  |
| H  | -0.63454 | -2.25845 | 0.07826  |
| H  | -1.24284 | -1.76134 | 1.67344  |
| C  | -2.86755 | -3.62729 | -0.74447 |
| H  | -2.29180 | -3.29360 | -1.60669 |
| H  | -2.46292 | -4.58850 | -0.41656 |
| H  | -3.89881 | -3.79493 | -1.06274 |
| C  | -3.55699 | -3.19618 | 1.61034  |
| H  | -3.53382 | -2.50554 | 2.45706  |
| H  | -4.60079 | -3.40683 | 1.37501  |
| H  | -3.08721 | -4.13260 | 1.92257  |
| C  | -7.85133 | 0.99260  | -0.51274 |
| H  | -7.89971 | 1.39827  | 0.50109  |
| H  | -7.37523 | 1.73414  | -1.15903 |
| H  | -8.87873 | 0.86020  | -0.85991 |
| C  | -7.83969 | -1.32077 | 0.38494  |
| H  | -7.39814 | -2.31867 | 0.35261  |
| H  | -7.79856 | -0.96758 | 1.41825  |
| H  | -8.89089 | -1.41308 | 0.09837  |
| C  | -7.19060 | -0.88639 | -1.99218 |
| H  | -6.69549 | -0.20656 | -2.68956 |
| H  | -6.70998 | -1.86269 | -2.08019 |
| H  | -8.23325 | -0.99541 | -2.30304 |
| Ge | 1.25622  | -0.35766 | -1.90388 |
| S  | -1.17236 | -0.91016 | -2.22535 |
| Cl | -1.54897 | 2.16403  | -1.45732 |

**R-P=C(Ge(II)Cl)-P(S)MeR**

**R= H**

|    |          |          |          |
|----|----------|----------|----------|
| P  | 0.32897  | 1.07023  | 0.55315  |
| C  | 0.14659  | 0.46782  | -0.97974 |
| P  | -1.36391 | 0.07867  | -1.77700 |
| Ge | 1.37533  | 0.33335  | -2.65217 |
| S  | -0.95068 | 0.61849  | -3.65510 |
| Cl | 1.38815  | -1.92294 | -2.63541 |
| H  | 1.74723  | 1.27230  | 0.51981  |
| C  | -2.87284 | 0.78533  | -1.09496 |

|   |          |          |          |
|---|----------|----------|----------|
| H | -3.72466 | 0.46137  | -1.69609 |
| H | -3.00034 | 0.44587  | -0.06432 |
| H | -2.80106 | 1.87292  | -1.12051 |
| H | -1.55507 | -1.31216 | -1.66179 |

**R = Me**

|    |          |          |          |
|----|----------|----------|----------|
| P  | 0.47572  | 0.49529  | 0.43608  |
| C  | 0.21324  | 0.21321  | -1.17370 |
| P  | -1.36531 | 0.06059  | -1.92052 |
| C  | -2.66800 | 1.06751  | -1.18162 |
| H  | -3.59217 | 0.93496  | -1.74789 |
| H  | -2.82595 | 0.76507  | -0.14394 |
| H  | -2.36901 | 2.11492  | -1.21670 |
| Ge | 1.36548  | 0.26551  | -2.90326 |
| S  | -0.94673 | 0.60169  | -3.81029 |
| Cl | 1.50410  | -1.98737 | -3.11929 |
| C  | -1.93512 | -1.64543 | -1.82033 |
| H  | -1.14775 | -2.28383 | -2.22379 |
| H  | -2.13151 | -1.90876 | -0.77867 |
| H  | -2.84348 | -1.75903 | -2.41518 |
| C  | 2.30484  | 0.55840  | 0.60090  |
| H  | 2.64535  | -0.39485 | 1.01661  |
| H  | 2.81162  | 0.72908  | -0.35020 |
| H  | 2.57759  | 1.34157  | 1.31174  |

**R = t-Bu**

|    |          |          |          |
|----|----------|----------|----------|
| P  | 0.64514  | -0.06737 | 0.39256  |
| C  | 0.15594  | 0.17902  | -1.17433 |
| P  | -1.55582 | 0.02519  | -1.60006 |
| Ge | 0.86855  | 0.94778  | -2.98499 |
| S  | -1.57458 | 0.75029  | -3.47899 |
| Cl | 1.60468  | -1.01630 | -3.84405 |
| C  | -2.21016 | -1.71150 | -1.53207 |
| C  | 2.50253  | 0.11287  | 0.52546  |
| C  | 2.74351  | 0.97348  | 1.76821  |
| H  | 3.81522  | 1.00794  | 1.98921  |
| H  | 2.39899  | 2.00031  | 1.62001  |
| H  | 2.23375  | 0.56960  | 2.64742  |
| C  | 3.02292  | -1.30602 | 0.77838  |
| H  | 4.09393  | -1.26577 | 1.00462  |
| H  | 2.52305  | -1.77936 | 1.62860  |
| H  | 2.88666  | -1.94250 | -0.09899 |
| C  | 3.19393  | 0.71911  | -0.68152 |
| H  | 2.81654  | 1.71906  | -0.90824 |
| H  | 4.26783  | 0.81164  | -0.48306 |
| H  | 3.08440  | 0.08971  | -1.56801 |
| C  | -2.30343 | -2.17665 | -0.08083 |
| H  | -2.61827 | -3.22428 | -0.07038 |
| H  | -1.34178 | -2.11476 | 0.43381  |
| H  | -3.03922 | -1.60723 | 0.49092  |
| C  | -3.59407 | -1.71887 | -2.18123 |
| H  | -3.96625 | -2.74729 | -2.19600 |
| H  | -4.31808 | -1.11687 | -1.62711 |
| H  | -3.55588 | -1.35950 | -3.21135 |
| C  | -1.26619 | -2.61649 | -2.31816 |
| H  | -1.15752 | -2.28699 | -3.35240 |
| H  | -0.26977 | -2.64892 | -1.87551 |
| H  | -1.67561 | -3.63100 | -2.32001 |
| C  | -2.60057 | 1.02715  | -0.51375 |
| H  | -3.64096 | 0.97675  | -0.83783 |
| H  | -2.51007 | 0.68813  | 0.51930  |
| H  | -2.25509 | 2.05837  | -0.58749 |

**R = Ph**

|   |         |         |         |
|---|---------|---------|---------|
| P | 0.75275 | 0.15675 | 0.68606 |
|---|---------|---------|---------|

|    |          |          |          |
|----|----------|----------|----------|
| C  | 0.20134  | 0.08260  | -0.87836 |
| P  | -1.50015 | 0.07398  | -1.30251 |
| C  | 2.55745  | 0.11649  | 0.55345  |
| C  | 3.28287  | 0.76657  | 1.55499  |
| C  | 3.24728  | -0.55070 | -0.46272 |
| C  | 4.66751  | 0.78874  | 1.51919  |
| C  | 4.63208  | -0.53471 | -0.48980 |
| C  | 5.34241  | 0.14016  | 0.49438  |
| H  | 5.22140  | 1.30698  | 2.29363  |
| H  | 5.15898  | -1.05685 | -1.28021 |
| C  | -2.56353 | 0.97801  | -0.15609 |
| H  | -3.58686 | 0.95978  | -0.53532 |
| H  | -2.53234 | 0.51602  | 0.83252  |
| H  | -2.21128 | 2.00771  | -0.09191 |
| C  | -2.14195 | -1.61730 | -1.31898 |
| C  | -2.57403 | -2.20133 | -2.50266 |
| C  | -2.19587 | -2.33587 | -0.12556 |
| C  | -3.07390 | -3.49534 | -2.48996 |
| C  | -2.69544 | -3.62653 | -0.11876 |
| C  | -3.13728 | -4.20553 | -1.30161 |
| H  | -3.40610 | -3.95088 | -3.41544 |
| H  | -2.73357 | -4.18508 | 0.80927  |
| Ge | 0.99648  | 0.50325  | -2.74996 |
| S  | -1.46877 | 0.91006  | -3.12525 |
| Cl | 1.09799  | -1.63142 | -3.50057 |
| H  | -3.52404 | -5.21825 | -1.29537 |
| H  | -2.50337 | -1.64337 | -3.42898 |
| H  | -1.83047 | -1.89838 | 0.79822  |
| H  | 2.75445  | 1.26612  | 2.36145  |
| H  | 2.70082  | -1.11378 | -1.21247 |
| H  | 6.42622  | 0.15012  | 0.46877  |

**R = Mes**

|    |          |          |          |
|----|----------|----------|----------|
| P  | 0.96591  | -0.20870 | 1.15034  |
| C  | 0.24053  | -0.15585 | -0.34171 |
| P  | -1.47882 | -0.05452 | -0.73114 |
| C  | 2.73679  | 0.03070  | 0.75499  |
| C  | 3.33259  | 1.26923  | 1.03409  |
| C  | 3.51429  | -1.03510 | 0.27582  |
| C  | 4.69295  | 1.43029  | 0.80738  |
| C  | 4.87223  | -0.82804 | 0.06588  |
| C  | 5.47987  | 0.39567  | 0.31766  |
| H  | 5.15021  | 2.39250  | 1.01988  |
| H  | 5.47471  | -1.65329 | -0.30271 |
| C  | -2.56893 | 0.56460  | 0.57936  |
| H  | -3.51556 | 0.83802  | 0.10778  |
| H  | -2.75980 | -0.17812 | 1.35274  |
| H  | -2.11432 | 1.45551  | 1.01374  |
| C  | -2.20013 | -1.65504 | -1.24272 |
| C  | -2.88631 | -1.84426 | -2.46385 |
| C  | -2.09676 | -2.73217 | -0.33689 |
| C  | -3.42645 | -3.09573 | -2.73441 |
| C  | -2.66302 | -3.95812 | -0.66744 |
| C  | -3.32463 | -4.16925 | -1.86359 |
| H  | -3.95368 | -3.22927 | -3.67379 |
| H  | -2.57692 | -4.77320 | 0.04483  |
| Ge | 1.06620  | 0.61972  | -2.07389 |
| S  | -1.31042 | 1.40708  | -2.11259 |
| Cl | 0.82381  | -1.26820 | -3.32351 |
| C  | 2.91956  | -2.38269 | -0.00948 |
| H  | 2.31759  | -2.74055 | 0.83197  |
| H  | 2.26594  | -2.35611 | -0.88612 |
| H  | 3.70368  | -3.11759 | -0.19636 |
| C  | 2.51780  | 2.42294  | 1.53812  |
| H  | 1.86684  | 2.81786  | 0.75178  |
| H  | 1.87066  | 2.12881  | 2.37100  |

|   |          |          |          |
|---|----------|----------|----------|
| H | 3.15931  | 3.23600  | 1.88074  |
| C | 6.93930  | 0.59928  | 0.04795  |
| H | 7.09955  | 0.92653  | -0.98422 |
| H | 7.36313  | 1.36318  | 0.70238  |
| H | 7.50334  | -0.32477 | 0.18774  |
| C | -1.37402 | -2.68366 | 0.97794  |
| H | -0.31105 | -2.89554 | 0.83754  |
| H | -1.43223 | -1.72807 | 1.49510  |
| H | -1.77727 | -3.44378 | 1.64863  |
| C | -3.08650 | -0.80094 | -3.52375 |
| H | -3.54978 | 0.10882  | -3.14188 |
| H | -2.13683 | -0.50968 | -3.97439 |
| H | -3.72909 | -1.20449 | -4.30715 |
| C | -3.89526 | -5.50717 | -2.21552 |
| H | -4.05427 | -6.12001 | -1.32696 |
| H | -4.84676 | -5.40789 | -2.74171 |
| H | -3.21434 | -6.05262 | -2.87617 |

**R = Mes\***

|    |          |          |          |
|----|----------|----------|----------|
| P  | 1.02219  | 0.81062  | 1.23389  |
| C  | 0.35356  | 0.33431  | -0.21281 |
| P  | -1.34079 | 0.33882  | -0.73559 |
| Cl | 1.83358  | -2.50005 | -1.17776 |
| C  | -2.92519 | 0.10433  | 0.19004  |
| C  | -3.52651 | -1.18648 | 0.15060  |
| C  | -3.76672 | 1.22080  | 0.43954  |
| C  | -4.89572 | -1.25299 | -0.06737 |
| C  | -5.13239 | 1.07340  | 0.21133  |
| C  | -5.71221 | -0.13287 | -0.14751 |
| H  | -5.34452 | -2.23405 | -0.16259 |
| H  | -5.76466 | 1.94132  | 0.33946  |
| C  | 2.83084  | 0.62285  | 0.92105  |
| C  | 3.51951  | -0.47562 | 1.48728  |
| C  | 3.51393  | 1.48761  | 0.02815  |
| C  | 4.74142  | -0.83919 | 0.92771  |
| C  | 4.72757  | 1.05196  | -0.48989 |
| C  | 5.32779  | -0.14187 | -0.11532 |
| H  | 5.24545  | -1.71139 | 1.31151  |
| H  | 5.23588  | 1.67594  | -1.21195 |
| C  | 3.03239  | -1.23104 | 2.74040  |
| C  | 3.07339  | 2.93046  | -0.31324 |
| C  | 6.60442  | -0.60611 | -0.80864 |
| C  | -3.35425 | 2.53101  | 1.14508  |
| C  | -2.84797 | -2.51491 | 0.54180  |
| C  | -7.18453 | -0.27450 | -0.51295 |
| C  | 4.30451  | 3.80990  | -0.58501 |
| H  | 3.98576  | 4.85311  | -0.65078 |
| H  | 5.04442  | 3.72955  | 0.21457  |
| H  | 4.79218  | 3.56936  | -1.53126 |
| C  | 2.35353  | 3.58666  | 0.86732  |
| H  | 1.38970  | 3.12085  | 1.09746  |
| H  | 2.96315  | 3.55150  | 1.77331  |
| H  | 2.14414  | 4.63436  | 0.63400  |
| C  | 2.18661  | 3.00399  | -1.55876 |
| H  | 2.66521  | 2.51776  | -2.41162 |
| H  | 1.22596  | 2.52012  | -1.39164 |
| H  | 2.00180  | 4.05046  | -1.82127 |
| C  | 7.70983  | 0.44014  | -0.62628 |
| H  | 8.62409  | 0.11384  | -1.13029 |
| H  | 7.42711  | 1.40806  | -1.04516 |
| H  | 7.93868  | 0.58636  | 0.43244  |
| C  | 7.10994  | -1.93770 | -0.25988 |
| H  | 8.00533  | -2.24090 | -0.80816 |
| H  | 7.37999  | -1.86784 | 0.79708  |
| H  | 6.36604  | -2.72972 | -0.37470 |
| C  | 6.31248  | -0.78430 | -2.30377 |

|    |          |          |          |
|----|----------|----------|----------|
| H  | 5.52348  | -1.52362 | -2.46018 |
| H  | 5.98866  | 0.15107  | -2.76504 |
| H  | 7.21170  | -1.12316 | -2.82638 |
| C  | 4.08037  | -2.22338 | 3.25188  |
| H  | 5.03695  | -1.74092 | 3.46613  |
| H  | 3.71657  | -2.66454 | 4.18283  |
| H  | 4.25081  | -3.04227 | 2.54911  |
| C  | 2.80025  | -0.21738 | 3.87028  |
| H  | 3.71537  | 0.34002  | 4.08561  |
| H  | 2.01567  | 0.50209  | 3.62762  |
| H  | 2.49664  | -0.74043 | 4.78178  |
| C  | 1.75476  | -2.03499 | 2.49654  |
| H  | 0.89563  | -1.39363 | 2.29207  |
| H  | 1.86534  | -2.71168 | 1.64832  |
| H  | 1.51276  | -2.61918 | 3.38977  |
| C  | -1.89910 | 2.57043  | 1.59655  |
| H  | -1.64641 | 1.69172  | 2.19275  |
| H  | -1.17474 | 2.64120  | 0.78841  |
| H  | -1.74298 | 3.44891  | 2.22780  |
| C  | -4.17317 | 2.57089  | 2.45346  |
| H  | -3.88077 | 3.44931  | 3.03536  |
| H  | -5.24627 | 2.63122  | 2.27138  |
| H  | -3.98204 | 1.68219  | 3.05915  |
| C  | -3.70258 | 3.78784  | 0.34183  |
| H  | -4.76756 | 3.83023  | 0.10544  |
| H  | -3.46170 | 4.67751  | 0.92992  |
| H  | -3.15570 | 3.85180  | -0.59876 |
| C  | -1.39365 | -2.37358 | 0.97003  |
| H  | -1.06793 | -3.30857 | 1.43270  |
| H  | -0.71274 | -2.18519 | 0.14265  |
| H  | -1.28145 | -1.58294 | 1.71587  |
| C  | -2.96834 | -3.59541 | -0.53484 |
| H  | -2.41216 | -3.32314 | -1.43067 |
| H  | -2.56012 | -4.53465 | -0.15210 |
| H  | -4.00822 | -3.77819 | -0.81509 |
| C  | -3.60440 | -2.99731 | 1.79857  |
| H  | -3.55586 | -2.25146 | 2.59609  |
| H  | -4.65531 | -3.21169 | 1.60013  |
| H  | -3.13746 | -3.91581 | 2.16384  |
| C  | -7.90213 | 1.07200  | -0.55422 |
| H  | -7.92362 | 1.55454  | 0.42634  |
| H  | -7.43582 | 1.75762  | -1.26625 |
| H  | -8.93836 | 0.92347  | -0.86698 |
| C  | -7.89112 | -1.16681 | 0.51444  |
| H  | -7.45826 | -2.16838 | 0.54893  |
| H  | -7.82584 | -0.73736 | 1.51716  |
| H  | -8.94871 | -1.27047 | 0.25652  |
| C  | -7.28756 | -0.91913 | -1.90048 |
| H  | -6.80399 | -0.29752 | -2.65788 |
| H  | -6.81424 | -1.90257 | -1.92468 |
| H  | -8.33724 | -1.04363 | -2.18046 |
| Ge | 1.18461  | -0.47975 | -1.96823 |
| S  | -1.22515 | -1.03131 | -2.22715 |
| C  | -1.57955 | 1.88299  | -1.67086 |
| H  | -1.49170 | 2.78866  | -1.07898 |
| H  | -0.80890 | 1.87921  | -2.44286 |
| H  | -2.55607 | 1.83759  | -2.15460 |

## E = Sn (II)

### R-P=C(Sn(II)Cl)-P(O)ClR

#### R = H

|    |          |          |          |
|----|----------|----------|----------|
| P  | 0.69394  | 0.17761  | 0.95797  |
| C  | 0.43367  | -0.24523 | -0.62073 |
| P  | -1.08519 | -0.26900 | -1.46159 |
| Cl | 1.12794  | -2.83210 | -2.73632 |
| Sn | 1.51799  | -0.45893 | -2.65407 |
| O  | -0.71546 | 0.00340  | -2.90543 |
| Cl | -2.49120 | 1.01015  | -0.79574 |
| H  | -1.74987 | -1.49475 | -1.29647 |
| H  | 2.12060  | 0.04682  | 0.97532  |

#### R = Me

|    |          |          |          |
|----|----------|----------|----------|
| P  | 0.72181  | 0.13247  | 0.93344  |
| C  | 0.43372  | -0.24877 | -0.64741 |
| P  | -1.11358 | -0.30536 | -1.43756 |
| Cl | 1.26300  | -2.82658 | -2.78254 |
| Sn | 1.45565  | -0.41400 | -2.71131 |
| O  | -0.76960 | -0.09686 | -2.90620 |
| Cl | -2.41790 | 1.12315  | -0.82561 |
| C  | 2.54508  | -0.00237 | 1.11754  |
| H  | 2.76234  | -0.89088 | 1.71900  |
| H  | 3.06826  | -0.08207 | 0.16443  |
| H  | 2.91551  | 0.86062  | 1.67671  |
| C  | -1.99834 | -1.83290 | -1.16096 |
| H  | -2.26663 | -1.92689 | -0.10835 |
| H  | -2.89607 | -1.84112 | -1.78113 |
| H  | -1.33187 | -2.64585 | -1.45894 |

#### R = t-Bu

|    |          |          |          |
|----|----------|----------|----------|
| P  | 0.77775  | 0.26149  | 0.18967  |
| C  | 0.68143  | -0.67807 | -1.16759 |
| P  | -0.79635 | -1.01124 | -2.04391 |
| Cl | 1.86171  | -3.93198 | -1.50801 |
| Sn | 1.88495  | -1.85709 | -2.75632 |
| O  | -0.32695 | -1.85354 | -3.22266 |
| C  | 2.55218  | 0.25173  | 0.78867  |
| C  | 2.94326  | 1.72393  | 0.94238  |
| H  | 3.00026  | 2.22938  | -0.02520 |
| H  | 2.22961  | 2.26936  | 1.56612  |
| H  | 3.92653  | 1.79670  | 1.41852  |
| C  | 3.53819  | -0.47031 | -0.10865 |
| H  | 3.29150  | -1.53137 | -0.20491 |
| H  | 3.58256  | -0.01799 | -1.10370 |
| H  | 4.54542  | -0.40958 | 0.31792  |
| C  | 2.50455  | -0.41153 | 2.16884  |
| H  | 2.24867  | -1.47128 | 2.09522  |
| H  | 3.48671  | -0.33360 | 2.64703  |
| H  | 1.77652  | 0.07158  | 2.82683  |
| C  | -2.17744 | -1.82307 | -1.15138 |
| C  | -2.73177 | -0.91109 | -0.06231 |
| H  | -3.17359 | -0.00345 | -0.47615 |
| H  | -3.51286 | -1.45188 | 0.47970  |
| H  | -1.96428 | -0.62278 | 0.65987  |
| C  | -3.25746 | -2.16925 | -2.17727 |
| H  | -2.86181 | -2.79732 | -2.97704 |
| H  | -4.05289 | -2.72213 | -1.66942 |
| H  | -3.69828 | -1.27515 | -2.62152 |
| C  | -1.60949 | -3.10570 | -0.53748 |
| H  | -1.18108 | -3.76606 | -1.29240 |
| H  | -0.83561 | -2.89738 | 0.20287  |
| H  | -2.42541 | -3.63638 | -0.03852 |

|    |          |         |          |
|----|----------|---------|----------|
| Cl | -1.59733 | 0.72375 | -2.75716 |
|----|----------|---------|----------|

#### R = Ph

|    |          |          |          |
|----|----------|----------|----------|
| P  | 0.76869  | 0.40716  | 0.36710  |
| C  | 0.32912  | -0.27270 | -1.07706 |
| P  | -1.25917 | -0.38268 | -1.76459 |
| C  | 2.56010  | 0.14271  | 0.44785  |
| C  | 3.21703  | -0.93231 | -0.15842 |
| C  | 3.30465  | 1.05937  | 1.19390  |
| C  | 4.59118  | -1.06259 | -0.04746 |
| C  | 4.68133  | 0.93433  | 1.29198  |
| C  | 5.32515  | -0.12531 | 0.66908  |
| H  | 5.09098  | -1.90392 | -0.51389 |
| H  | 5.25211  | 1.66014  | 1.85982  |
| C  | -2.22898 | -1.75818 | -1.15748 |
| C  | -2.39833 | -2.86300 | -1.98638 |
| C  | -2.76453 | -1.75195 | 0.12912  |
| C  | -3.11306 | -3.95871 | -1.52577 |
| C  | -3.47382 | -2.84996 | 0.58061  |
| C  | -3.64868 | -3.95237 | -0.24755 |
| H  | -3.24646 | -4.82042 | -2.16905 |
| H  | -3.89339 | -2.84738 | 1.57976  |
| Cl | 1.22683  | -3.09893 | -2.96803 |
| Sn | 1.26292  | -0.68361 | -3.13364 |
| O  | -1.00178 | -0.48986 | -3.25919 |
| Cl | -2.40697 | 1.24632  | -1.36611 |
| H  | -2.63164 | -0.88961 | 0.77323  |
| H  | -4.20557 | -4.81131 | 0.10941  |
| H  | -1.96630 | -2.86150 | -2.97919 |
| H  | 2.79902  | 1.88222  | 1.69024  |
| H  | 6.40090  | -0.23014 | 0.75313  |
| H  | 2.64327  | -1.69023 | -0.68310 |

#### R = Mes

|   |          |          |          |
|---|----------|----------|----------|
| P | 0.81483  | 0.14849  | 1.06723  |
| C | 0.40895  | -0.51623 | -0.39429 |
| P | -1.08090 | -0.46356 | -1.30350 |
| C | 2.66191  | 0.10628  | 0.97024  |
| C | 3.38637  | -1.09611 | 1.16780  |
| C | 3.34124  | 1.27726  | 0.55304  |
| C | 4.70096  | -1.14259 | 0.71921  |
| C | 4.66443  | 1.14742  | 0.13074  |
| C | 5.34798  | -0.05662 | 0.14628  |
| H | 5.25123  | -2.06624 | 0.82958  |
| H | 5.17952  | 2.02416  | -0.22711 |
| C | 2.73339  | 2.69829  | 0.59763  |
| C | 2.83977  | -2.32862 | 1.91827  |
| C | 6.77099  | -0.20911 | -0.38269 |
| C | 2.04408  | -3.26144 | 0.99906  |
| H | 1.15112  | -2.78828 | 0.59490  |
| H | 2.64998  | -3.58720 | 0.15124  |
| H | 1.73793  | -4.15184 | 1.55678  |
| C | 1.97837  | -1.89747 | 3.10732  |
| H | 2.53641  | -1.24629 | 3.78480  |
| H | 1.06729  | -1.36578 | 2.81347  |
| H | 1.65091  | -2.77859 | 3.66562  |
| C | 3.98535  | -3.15837 | 2.51514  |
| H | 4.56520  | -3.68102 | 1.75196  |
| H | 4.66613  | -2.54686 | 3.11247  |
| H | 3.55988  | -3.92521 | 3.16662  |
| C | 1.67875  | 2.93158  | -0.49152 |
| H | 0.77237  | 2.34527  | -0.34172 |
| H | 1.38444  | 3.98493  | -0.49466 |
| H | 2.07818  | 2.69269  | -1.48075 |
| C | 2.12519  | 2.96216  | 1.98142  |





|    |          |          |          |
|----|----------|----------|----------|
| H  | -5.27646 | 2.49317  | 2.37300  |
| H  | -3.92947 | 1.64609  | 3.13935  |
| C  | -3.84068 | 3.69554  | 0.35579  |
| H  | -4.91094 | 3.69779  | 0.14143  |
| H  | -3.61613 | 4.60774  | 0.91544  |
| H  | -3.30555 | 3.73905  | -0.59239 |
| C  | -1.43489 | -2.40693 | 1.12774  |
| H  | -1.06914 | -3.37685 | 1.47307  |
| H  | -0.66290 | -2.02189 | 0.46729  |
| H  | -1.52189 | -1.75552 | 2.00163  |
| C  | -2.64970 | -3.46042 | -0.80549 |
| H  | -2.02271 | -2.97595 | -1.55061 |
| H  | -2.19788 | -4.42059 | -0.54189 |
| H  | -3.62746 | -3.66187 | -1.25117 |
| C  | -3.64340 | -3.37186 | 1.47376  |
| H  | -3.82648 | -2.77641 | 2.37169  |
| H  | -4.60672 | -3.69077 | 1.07502  |
| H  | -3.10133 | -4.27355 | 1.76929  |
| C  | -7.93909 | 0.92099  | -0.45702 |
| H  | -7.96354 | 1.37521  | 0.53688  |
| H  | -7.49410 | 1.63669  | -1.15278 |
| H  | -8.97413 | 0.75722  | -0.76618 |
| C  | -7.87028 | -1.34708 | 0.54626  |
| H  | -7.41241 | -2.33805 | 0.55148  |
| H  | -7.81040 | -0.94397 | 1.56021  |
| H  | -8.92635 | -1.46927 | 0.29017  |
| C  | -7.28770 | -1.01509 | -1.86426 |
| H  | -6.82039 | -0.36161 | -2.60474 |
| H  | -6.79568 | -1.98806 | -1.91997 |
| H  | -8.33620 | -1.15236 | -2.14272 |
| Sn | 1.11531  | -0.60660 | -1.88096 |
| Cl | -1.63779 | 1.92929  | -1.71858 |

**R-P=C(Sn(II)Cl)-P(O)MeR**

**R= H**

|    |          |          |          |
|----|----------|----------|----------|
| P  | 0.72355  | 0.08207  | 1.06498  |
| C  | 0.50601  | -0.27368 | -0.53604 |
| P  | -0.99701 | -0.21989 | -1.43563 |
| Cl | 1.17390  | -2.93133 | -2.53486 |
| Sn | 1.64945  | -0.56471 | -2.51938 |
| O  | -0.51930 | -0.03131 | -2.87599 |
| H  | 2.14801  | -0.05751 | 1.13695  |
| H  | -1.67650 | -1.44386 | -1.26598 |
| C  | -2.19104 | 1.02356  | -0.94288 |
| H  | -3.06460 | 0.97197  | -1.59553 |
| H  | -2.49551 | 0.84593  | 0.09129  |
| H  | -1.73392 | 2.01058  | -1.02340 |

**R = Me**

|    |          |          |          |
|----|----------|----------|----------|
| P  | 0.71825  | 0.06447  | 0.93512  |
| C  | 0.44651  | -0.23992 | -0.66390 |
| P  | -1.11538 | -0.25737 | -1.46330 |
| Cl | 1.30734  | -2.83990 | -2.74302 |
| Sn | 1.47410  | -0.41763 | -2.71947 |
| O  | -0.72259 | -0.10740 | -2.94180 |
| C  | 2.54378  | -0.03232 | 1.13969  |
| H  | 2.77930  | -0.92775 | 1.72309  |
| H  | 3.07257  | -0.07795 | 0.18728  |
| H  | 2.89039  | 0.82814  | 1.71789  |
| C  | -1.97362 | -1.80618 | -1.17140 |
| H  | -2.24602 | -1.89647 | -0.11817 |
| H  | -2.87096 | -1.84853 | -1.79255 |
| H  | -1.30010 | -2.61870 | -1.44976 |
| C  | -2.23315 | 1.05979  | -0.96442 |
| H  | -3.15316 | 1.00457  | -1.55001 |

|   |          |         |          |
|---|----------|---------|----------|
| H | -2.46840 | 0.96763 | 0.09793  |
| H | -1.74953 | 2.02056 | -1.14348 |

**R = t-Bu**

|    |          |          |          |
|----|----------|----------|----------|
| P  | 0.72196  | 0.23363  | 0.43195  |
| C  | 0.55535  | -0.54342 | -1.01629 |
| P  | -0.97651 | -0.77277 | -1.85938 |
| Cl | 1.80772  | -3.70459 | -1.86256 |
| Sn | 1.67091  | -1.47832 | -2.81757 |
| O  | -0.53233 | -1.46702 | -3.15976 |
| C  | -1.74174 | 0.81497  | -2.24376 |
| H  | -2.63930 | 0.67308  | -2.84771 |
| H  | -1.98750 | 1.35624  | -1.32931 |
| H  | -1.01961 | 1.39881  | -2.81636 |
| C  | 2.53229  | 0.21797  | 0.92297  |
| C  | 2.90065  | 1.67472  | 1.21247  |
| H  | 2.88601  | 2.28202  | 0.30354  |
| H  | 2.21500  | 2.12962  | 1.93297  |
| H  | 3.90986  | 1.72548  | 1.63446  |
| C  | 3.47300  | -0.37482 | -0.10776 |
| H  | 3.23759  | -1.42306 | -0.31120 |
| H  | 3.44664  | 0.18616  | -1.04637 |
| H  | 4.50380  | -0.33854 | 0.26195  |
| C  | 2.59084  | -0.59124 | 2.22198  |
| H  | 2.35277  | -1.64349 | 2.04843  |
| H  | 3.60027  | -0.53846 | 2.64383  |
| H  | 1.89653  | -0.20347 | 2.97298  |
| C  | -2.22315 | -1.79834 | -0.97848 |
| C  | -2.77935 | -1.04139 | 0.22496  |
| H  | -3.34695 | -0.15577 | -0.06945 |
| H  | -3.45891 | -1.69967 | 0.77419  |
| H  | -1.98934 | -0.73230 | 0.91441  |
| C  | -3.33933 | -2.12472 | -1.97356 |
| H  | -2.94695 | -2.62306 | -2.86164 |
| H  | -4.05533 | -2.79761 | -1.49250 |
| H  | -3.88821 | -1.23400 | -2.28851 |
| C  | -1.55000 | -3.09220 | -0.52277 |
| H  | -1.10985 | -3.63838 | -1.35804 |
| H  | -0.75780 | -2.90324 | 0.20320  |
| H  | -2.30185 | -3.73170 | -0.05064 |

**R = Ph**

|    |          |          |          |
|----|----------|----------|----------|
| P  | 0.77065  | 0.34447  | 0.42772  |
| C  | 0.33531  | -0.27034 | -1.04485 |
| P  | -1.27787 | -0.33920 | -1.72168 |
| C  | 2.56982  | 0.11580  | 0.50511  |
| C  | 3.24088  | -0.93150 | -0.13175 |
| C  | 3.30171  | 1.02029  | 1.27690  |
| C  | 4.61705  | -1.04596 | -0.02490 |
| C  | 4.68020  | 0.91149  | 1.37183  |
| C  | 5.33876  | -0.12048 | 0.71860  |
| H  | 5.12794  | -1.86615 | -0.51643 |
| H  | 5.24102  | 1.62840  | 1.96073  |
| C  | -2.19987 | -1.75821 | -1.11236 |
| C  | -2.51386 | -2.78697 | -1.99410 |
| C  | -2.59245 | -1.83913 | 0.22239  |
| C  | -3.22981 | -3.88601 | -1.54263 |
| C  | -3.30709 | -2.93778 | 0.66725  |
| C  | -3.62771 | -3.96038 | -0.21687 |
| H  | -3.46990 | -4.68948 | -2.22916 |
| H  | -3.60951 | -3.00122 | 1.70611  |
| Cl | 1.19731  | -3.10657 | -2.91185 |
| Sn | 1.23295  | -0.69016 | -3.11513 |
| O  | -1.00314 | -0.47317 | -3.22542 |
| H  | -2.32649 | -1.05338 | 0.92269  |

|   |          |          |          |
|---|----------|----------|----------|
| H | -4.18411 | -4.82216 | 0.13402  |
| H | -2.18503 | -2.72361 | -3.02424 |
| H | 2.78507  | 1.82131  | 1.79723  |
| H | 6.41593  | -0.21285 | 0.79959  |
| H | 2.67686  | -1.67984 | -0.68023 |
| C | -2.28913 | 1.10885  | -1.37979 |
| H | -3.24521 | 1.01314  | -1.89756 |
| H | -2.46419 | 1.20367  | -0.30647 |
| H | -1.76358 | 1.99519  | -1.73781 |

**R = Mes**

|    |          |          |          |
|----|----------|----------|----------|
| P  | 0.87119  | 0.14466  | 0.97501  |
| C  | 0.30879  | -0.28708 | -0.51883 |
| P  | -1.28340 | -0.24806 | -1.27078 |
| C  | 2.68939  | 0.07091  | 0.75779  |
| C  | 3.36260  | -1.16138 | 0.74362  |
| C  | 3.41370  | 1.27000  | 0.68944  |
| C  | 4.74790  | -1.16294 | 0.62919  |
| C  | 4.79708  | 1.21922  | 0.57297  |
| C  | 5.48317  | 0.01220  | 0.53361  |
| H  | 5.26887  | -2.11612 | 0.62277  |
| H  | 5.35377  | 2.15040  | 0.51565  |
| C  | -2.24537 | -1.77291 | -1.07095 |
| C  | -2.75354 | -2.46716 | -2.19246 |
| C  | -2.52655 | -2.24764 | 0.22486  |
| C  | -3.51038 | -3.61192 | -1.97286 |
| C  | -3.29299 | -3.39652 | 0.37895  |
| C  | -3.78844 | -4.10116 | -0.70508 |
| H  | -3.90165 | -4.13884 | -2.83769 |
| H  | -3.50581 | -3.74636 | 1.38476  |
| Cl | 1.22043  | -2.69121 | -2.86199 |
| Sn | 1.33293  | -0.27873 | -2.55540 |
| O  | -0.88113 | 0.02316  | -2.72926 |
| C  | -2.34615 | 1.11552  | -0.74971 |
| H  | -3.19635 | 1.15782  | -1.43394 |
| H  | -2.71383 | 0.99662  | 0.26857  |
| H  | -1.77571 | 2.04240  | -0.82753 |
| C  | 2.71767  | 2.59930  | 0.71303  |
| H  | 2.19519  | 2.79139  | -0.22937 |
| H  | 1.96723  | 2.64941  | 1.50846  |
| H  | 3.42987  | 3.41069  | 0.86964  |
| C  | 2.63043  | -2.46597 | 0.86012  |
| H  | 1.90135  | -2.44479 | 1.67598  |
| H  | 2.08044  | -2.70308 | -0.05487 |
| H  | 3.32850  | -3.28151 | 1.05399  |
| C  | 6.97270  | -0.02371 | 0.37695  |
| H  | 7.24951  | -0.10658 | -0.67884 |
| H  | 7.43675  | 0.88418  | 0.76643  |
| H  | 7.40715  | -0.88097 | 0.89471  |
| C  | -2.01667 | -1.60990 | 1.48379  |
| H  | -1.02090 | -1.98785 | 1.73119  |
| H  | -1.93041 | -0.52547 | 1.43505  |
| H  | -2.67685 | -1.85005 | 2.31867  |
| C  | -2.53815 | -2.06838 | -3.62447 |
| H  | -2.79877 | -1.02833 | -3.81696 |
| H  | -1.49138 | -2.18734 | -3.90860 |
| H  | -3.14453 | -2.70439 | -4.27051 |
| C  | -4.58250 | -5.35660 | -0.52048 |
| H  | -3.94366 | -6.23664 | -0.64371 |
| H  | -5.02429 | -5.40709 | 0.47593  |
| H  | -5.38394 | -5.43248 | -1.25804 |

**R = Mes\***

|   |         |         |          |
|---|---------|---------|----------|
| P | 0.98449 | 1.17810 | 1.26456  |
| C | 0.28364 | 0.51089 | -0.07810 |

|    |          |          |          |
|----|----------|----------|----------|
| P  | -1.36975 | 0.32425  | -0.67518 |
| Cl | 1.58008  | -2.82633 | -0.67886 |
| O  | -1.18000 | -0.90053 | -1.59494 |
| C  | -2.97933 | 0.12442  | 0.20040  |
| C  | -3.55979 | -1.17623 | 0.19970  |
| C  | -3.84166 | 1.23703  | 0.38145  |
| C  | -4.92657 | -1.27459 | -0.02228 |
| C  | -5.20634 | 1.05485  | 0.17117  |
| C  | -5.76571 | -0.17455 | -0.13340 |
| H  | -5.35548 | -2.26529 | -0.10070 |
| H  | -5.85348 | 1.91631  | 0.26161  |
| C  | 2.77732  | 0.86049  | 0.94036  |
| C  | 3.42123  | -0.18983 | 1.63459  |
| C  | 3.47261  | 1.54973  | -0.08516 |
| C  | 4.60699  | -0.69345 | 1.10399  |
| C  | 4.64972  | 0.98366  | -0.56204 |
| C  | 5.20321  | -0.17445 | -0.03317 |
| H  | 5.07362  | -1.53402 | 1.59157  |
| H  | 5.16842  | 1.47355  | -1.37469 |
| C  | 2.92475  | -0.74872 | 2.98428  |
| C  | 3.08032  | 2.94135  | -0.63382 |
| C  | 6.44616  | -0.78763 | -0.67071 |
| C  | -3.45395 | 2.60719  | 0.97673  |
| C  | -2.83758 | -2.48670 | 0.56854  |
| C  | -7.23836 | -0.35890 | -0.47967 |
| C  | 4.33611  | 3.71731  | -1.06182 |
| H  | 4.05552  | 4.74976  | -1.28408 |
| H  | 5.09086  | 3.73222  | -0.27228 |
| H  | 4.79275  | 3.31320  | -1.96700 |
| C  | 2.41215  | 3.80010  | 0.44243  |
| H  | 1.43432  | 3.41845  | 0.75338  |
| H  | 3.03802  | 3.87622  | 1.33466  |
| H  | 2.24223  | 4.80840  | 0.05466  |
| C  | 2.16466  | 2.85612  | -1.85861 |
| H  | 2.61178  | 2.23663  | -2.64013 |
| H  | 1.19508  | 2.43352  | -1.59875 |
| H  | 2.00241  | 3.85622  | -2.27262 |
| C  | 7.60085  | 0.22016  | -0.63409 |
| H  | 8.49340  | -0.21212 | -1.09541 |
| H  | 7.35776  | 1.13694  | -1.17525 |
| H  | 7.84807  | 0.49339  | 0.39484  |
| C  | 6.89651  | -2.05891 | 0.04406  |
| H  | 7.76775  | -2.47503 | -0.46783 |
| H  | 7.18651  | -1.86405 | 1.07978  |
| H  | 6.11423  | -2.82174 | 0.04214  |
| C  | 6.12993  | -1.14562 | -2.12805 |
| H  | 5.31111  | -1.86707 | -2.18263 |
| H  | 5.84067  | -0.26531 | -2.70606 |
| H  | 7.00820  | -1.58723 | -2.60763 |
| C  | 3.93471  | -1.71999 | 3.60248  |
| H  | 4.91990  | -1.26547 | 3.73165  |
| H  | 3.57414  | -2.01410 | 4.59089  |
| H  | 4.04420  | -2.63263 | 3.01199  |
| C  | 2.77012  | 0.41268  | 3.97651  |
| H  | 3.71739  | 0.94261  | 4.10489  |
| H  | 2.01867  | 1.13654  | 3.65494  |
| H  | 2.45957  | 0.02772  | 4.95215  |
| C  | 1.60358  | -1.51363 | 2.86963  |
| H  | 0.76319  | -0.86228 | 2.62201  |
| H  | 1.65745  | -2.28626 | 2.10124  |
| H  | 1.37081  | -1.98476 | 3.82949  |
| C  | -1.98917 | 2.73190  | 1.37280  |
| H  | -1.67719 | 1.90066  | 2.00792  |
| H  | -1.30170 | 2.78882  | 0.53138  |
| H  | -1.84834 | 3.65001  | 1.94874  |
| C  | -4.23921 | 2.72900  | 2.29939  |

|    |          |          |          |
|----|----------|----------|----------|
| H  | -3.97227 | 3.66660  | 2.79494  |
| H  | -5.31836 | 2.72635  | 2.14444  |
| H  | -3.99295 | 1.90547  | 2.97355  |
| C  | -3.85568 | 3.78311  | 0.08071  |
| H  | -4.92833 | 3.79031  | -0.12121 |
| H  | -3.60899 | 4.72521  | 0.57786  |
| H  | -3.34199 | 3.76871  | -0.88126 |
| C  | -1.49100 | -2.24400 | 1.24162  |
| H  | -1.10131 | -3.19148 | 1.62111  |
| H  | -0.73046 | -1.85991 | 0.56859  |
| H  | -1.59736 | -1.56226 | 2.08979  |
| C  | -2.68750 | -3.42803 | -0.62940 |
| H  | -2.05828 | -2.98773 | -1.39928 |
| H  | -2.23363 | -4.36791 | -0.30353 |
| H  | -3.66289 | -3.66073 | -1.06564 |
| C  | -3.69532 | -3.20201 | 1.63236  |
| H  | -3.89533 | -2.55040 | 2.48670  |
| H  | -4.65036 | -3.55887 | 1.24527  |
| H  | -3.14666 | -4.07550 | 1.99337  |
| C  | -7.98349 | 0.97053  | -0.56496 |
| H  | -8.00348 | 1.49046  | 0.39630  |
| H  | -7.53885 | 1.63701  | -1.30840 |
| H  | -9.01999 | 0.78953  | -0.85940 |
| C  | -7.91699 | -1.22447 | 0.58861  |
| H  | -7.46110 | -2.21381 | 0.65925  |
| H  | -7.85173 | -0.75393 | 1.57273  |
| H  | -8.97448 | -1.36101 | 0.34560  |
| C  | -7.34323 | -1.05811 | -1.84023 |
| H  | -6.88096 | -0.45589 | -2.62619 |
| H  | -6.85025 | -2.03210 | -1.83262 |
| H  | -8.39305 | -1.21457 | -2.10341 |
| Sn | 1.04999  | -0.76816 | -1.84906 |
| C  | -1.67888 | 1.68714  | -1.83223 |
| H  | -2.62307 | 1.48478  | -2.34079 |
| H  | -1.70424 | 2.67625  | -1.38659 |
| H  | -0.87234 | 1.64947  | -2.56812 |

**R-P=C(Sn(II)Cl)-P(S)ClR**

**R= H**

|    |          |          |          |
|----|----------|----------|----------|
| P  | 0.04347  | 0.93418  | 0.51148  |
| C  | 0.15358  | 0.42272  | -1.06044 |
| P  | -1.15150 | -0.15594 | -2.04328 |
| Cl | 1.98926  | -1.66301 | -3.04141 |
| Sn | 1.63672  | 0.71514  | -2.79121 |
| S  | -0.88388 | 0.68025  | -3.82066 |
| H  | 1.40813  | 1.33760  | 0.68077  |
| Cl | -3.02228 | 0.08518  | -1.29632 |
| H  | -1.08601 | -1.55781 | -2.09220 |

**R = Me**

|    |          |          |          |
|----|----------|----------|----------|
| P  | 0.47280  | 0.42786  | 0.60047  |
| C  | 0.19222  | 0.15376  | -1.00729 |
| P  | -1.37691 | -0.03348 | -1.72371 |
| Cl | 1.42712  | -1.93366 | -3.49360 |
| Sn | 1.36302  | 0.43680  | -2.96333 |
| S  | -1.23062 | 0.82849  | -3.51695 |
| Cl | -2.90685 | 0.76724  | -0.63210 |
| C  | 2.30197  | 0.52513  | 0.74319  |
| H  | 2.64605  | -0.35339 | 1.29800  |
| H  | 2.81629  | 0.56142  | -0.21785 |
| H  | 2.56725  | 1.40293  | 1.33814  |
| C  | -1.83641 | -1.76633 | -1.82376 |
| H  | -1.93861 | -2.17242 | -0.81634 |
| H  | -2.77882 | -1.85137 | -2.36610 |

|   |          |          |          |
|---|----------|----------|----------|
| H | -1.03982 | -2.28151 | -2.36589 |
|---|----------|----------|----------|

**R =t-Bu**

|    |          |          |          |
|----|----------|----------|----------|
| P  | 0.31834  | 0.07007  | 0.55364  |
| C  | 0.06825  | 0.23399  | -1.07896 |
| P  | -1.54089 | 0.03444  | -1.74327 |
| Cl | 1.91897  | -0.97641 | -3.83029 |
| Sn | 1.10169  | 1.12776  | -2.93425 |
| S  | -1.50441 | 0.90379  | -3.54000 |
| C  | 2.14809  | 0.21017  | 0.92293  |
| C  | 2.26744  | 1.25131  | 2.03890  |
| H  | 3.29788  | 1.27920  | 2.40792  |
| H  | 2.01022  | 2.25301  | 1.68511  |
| H  | 1.61637  | 1.01484  | 2.88502  |
| C  | 2.53218  | -1.16908 | 1.47082  |
| H  | 3.55828  | -1.13613 | 1.85210  |
| H  | 1.88222  | -1.47615 | 2.29528  |
| H  | 2.48595  | -1.93636 | 0.69418  |
| C  | 3.04273  | 0.57591  | -0.24522 |
| H  | 4.08928  | 0.59322  | 0.07877  |
| H  | 2.96825  | -0.15085 | -1.05880 |
| H  | 2.81398  | 1.57359  | -0.63078 |
| C  | -2.13284 | -1.72407 | -1.82389 |
| C  | -1.10395 | -2.51474 | -2.63050 |
| C  | -2.26118 | -2.30242 | -0.41877 |
| C  | -3.48336 | -1.73962 | -2.53685 |
| H  | -0.98343 | -2.11904 | -3.63955 |
| H  | -0.12202 | -2.51925 | -2.15569 |
| H  | -1.45303 | -3.54863 | -2.70701 |
| H  | -3.00651 | -1.77476 | 0.17742  |
| H  | -2.57411 | -3.34681 | -0.50676 |
| H  | -1.31160 | -2.28523 | 0.11989  |
| H  | -3.80573 | -2.77971 | -2.63808 |
| H  | -4.24890 | -1.20150 | -1.97548 |
| H  | -3.41446 | -1.30930 | -3.53760 |
| Cl | -2.95664 | 0.94086  | -0.56767 |

**R = Ph**

|    |          |          |          |
|----|----------|----------|----------|
| P  | 0.79669  | 0.50120  | 0.49437  |
| C  | 0.27373  | -0.12477 | -0.95053 |
| P  | -1.36146 | -0.12752 | -1.52336 |
| C  | 2.56713  | 0.11028  | 0.51518  |
| C  | 3.11400  | -1.03855 | -0.06525 |
| C  | 3.41009  | 0.99748  | 1.18852  |
| C  | 4.47832  | -1.27093 | -0.00119 |
| C  | 4.77577  | 0.76867  | 1.23979  |
| C  | 5.31050  | -0.36429 | 0.64261  |
| H  | 4.89189  | -2.16742 | -0.44876 |
| H  | 5.42350  | 1.47135  | 1.75135  |
| C  | -2.20735 | -1.64461 | -1.04291 |
| C  | -2.55129 | -2.58616 | -2.00447 |
| C  | -2.47388 | -1.88259 | 0.30464  |
| C  | -3.17294 | -3.76415 | -1.61707 |
| C  | -3.09360 | -3.05958 | 0.68218  |
| C  | -3.44424 | -4.00009 | -0.27917 |
| H  | -3.43918 | -4.50019 | -2.36631 |
| H  | -3.30365 | -3.24553 | 1.72894  |
| Cl | 1.06515  | -2.92125 | -2.93321 |
| Sn | 1.33096  | -0.50811 | -2.94067 |
| S  | -1.24599 | 0.12561  | -3.49360 |
| Cl | -2.51026 | 1.32678  | -0.65510 |
| H  | -2.20107 | -1.14908 | 1.05538  |
| H  | -2.32368 | -2.39829 | -3.04647 |
| H  | -3.92853 | -4.92255 | 0.02038  |
| H  | 2.46423  | -1.77266 | -0.53242 |

|   |         |          |         |
|---|---------|----------|---------|
| H | 2.99089 | 1.87838  | 1.66524 |
| H | 6.37768 | -0.54890 | 0.69026 |

**R = Mes**

|   |          |          |          |
|---|----------|----------|----------|
| P | -0.93732 | -0.20597 | 1.88111  |
| C | -0.02011 | -0.45939 | 0.51954  |
| P | 1.44833  | -1.39282 | 0.37799  |
| C | -2.55934 | 0.30818  | 1.15171  |
| C | -2.76982 | 1.60905  | 0.62756  |
| C | -3.57029 | -0.67635 | 1.01266  |
| C | -3.86415 | 1.80556  | -0.20666 |
| C | -4.64432 | -0.39358 | 0.16903  |
| C | -4.78698 | 0.81135  | -0.49751 |
| H | -4.01137 | 2.78343  | -0.64253 |
| H | -5.39857 | -1.14987 | 0.02484  |
| C | -3.59316 | -2.01946 | 1.77874  |
| C | -1.91020 | 2.84056  | 0.97870  |
| C | -5.92633 | 1.08979  | -1.47324 |
| C | -0.67090 | 2.94718  | 0.08409  |
| H | 0.00591  | 2.10301  | 0.20280  |
| H | -0.95329 | 2.99324  | -0.97000 |
| H | -0.12055 | 3.86245  | 0.32264  |
| C | -1.50643 | 2.81139  | 2.45428  |
| H | -2.38583 | 2.76196  | 3.10125  |
| H | -0.85864 | 1.96739  | 2.71116  |
| H | -0.94452 | 3.71557  | 2.70285  |
| C | -2.70707 | 4.13992  | 0.79438  |
| H | -2.89483 | 4.37119  | -0.25591 |
| H | -3.66363 | 4.11199  | 1.32192  |
| H | -2.12221 | 4.96918  | 1.19911  |
| C | -2.54750 | -3.01484 | 1.26118  |
| H | -1.52186 | -2.70137 | 1.45400  |
| H | -2.68828 | -3.98121 | 1.75361  |
| H | -2.65423 | -3.16943 | 0.18438  |
| C | -3.39009 | -1.77090 | 3.27938  |
| H | -2.41322 | -1.34312 | 3.51271  |
| H | -4.15587 | -1.09393 | 3.66607  |
| H | -3.46475 | -2.71702 | 3.82244  |
| C | -4.95062 | -2.72055 | 1.64944  |
| H | -5.77698 | -2.08276 | 1.97180  |
| H | -5.14942 | -3.06244 | 0.63108  |
| H | -4.94509 | -3.60563 | 2.28942  |
| C | -6.83223 | -0.12293 | -1.66972 |
| H | -7.32638 | -0.41891 | -0.74079 |
| H | -7.61360 | 0.12024  | -2.39373 |
| H | -6.28010 | -0.98343 | -2.05586 |
| C | -5.33490 | 1.47230  | -2.83529 |
| H | -4.70409 | 2.36086  | -2.76789 |
| H | -4.72523 | 0.66008  | -3.23856 |
| H | -6.13645 | 1.68405  | -3.54849 |
| C | -6.78227 | 2.24871  | -0.94859 |
| H | -6.19915 | 3.16457  | -0.83359 |
| H | -7.59896 | 2.45897  | -1.64489 |
| H | -7.21815 | 2.00388  | 0.02322  |
| C | 2.98458  | -0.40887 | 0.21642  |
| C | 3.83798  | -0.44987 | -0.91934 |
| C | 3.31871  | 0.43026  | 1.30631  |
| C | 4.97018  | 0.35327  | -0.91711 |
| C | 4.47156  | 1.20242  | 1.23077  |
| C | 5.31255  | 1.18646  | 0.13544  |
| H | 5.61438  | 0.32185  | -1.78625 |
| H | 4.72392  | 1.84125  | 2.07032  |
| C | 3.65406  | -1.34946 | -2.12545 |
| C | 4.30732  | -2.70737 | -1.86787 |
| C | 4.16339  | -0.75268 | -3.43341 |
| H | 2.58969  | -1.50847 | -2.26809 |

|    |          |          |          |
|----|----------|----------|----------|
| H  | 3.90858  | -3.18789 | -0.97215 |
| H  | 4.13273  | -3.37866 | -2.71276 |
| H  | 5.38808  | -2.59646 | -1.73817 |
| H  | 3.76918  | 0.25249  | -3.59326 |
| H  | 5.25489  | -0.71708 | -3.48973 |
| H  | 3.82488  | -1.37873 | -4.26237 |
| C  | 2.53825  | 0.55795  | 2.60170  |
| C  | 2.11608  | 2.00168  | 2.86606  |
| C  | 3.33912  | 0.01203  | 3.78369  |
| H  | 1.62281  | -0.02913 | 2.54124  |
| H  | 1.56251  | 2.41791  | 2.02354  |
| H  | 1.47887  | 2.04720  | 3.75269  |
| H  | 2.97931  | 2.64525  | 3.05026  |
| H  | 3.64231  | -1.02243 | 3.61885  |
| H  | 4.24068  | 0.60556  | 3.95489  |
| H  | 2.73581  | 0.05049  | 4.69432  |
| C  | 6.55354  | 2.04367  | 0.09345  |
| C  | 6.48822  | 3.06694  | -1.03806 |
| C  | 7.82014  | 1.19668  | -0.00507 |
| H  | 6.59244  | 2.59383  | 1.04048  |
| H  | 5.59735  | 3.69315  | -0.95700 |
| H  | 7.36709  | 3.71643  | -1.01732 |
| H  | 6.46115  | 2.57446  | -2.01356 |
| H  | 7.88493  | 0.48035  | 0.81673  |
| H  | 7.84633  | 0.63404  | -0.94194 |
| H  | 8.70850  | 1.83271  | 0.02467  |
| Cl | 0.67675  | 0.75464  | -2.72052 |
| Sn | -0.87825 | -0.74190 | -1.57971 |
| S  | 0.89542  | -2.68608 | -1.05223 |
| Cl | 1.84440  | -2.59883 | 2.01188  |

**R = Mes\***

|    |          |          |          |
|----|----------|----------|----------|
| P  | 0.92866  | 0.74682  | 1.43933  |
| C  | 0.31814  | 0.34860  | -0.05561 |
| P  | -1.34254 | 0.24874  | -0.60098 |
| Cl | 1.93487  | -2.68408 | -1.03843 |
| C  | -2.94999 | 0.06365  | 0.28455  |
| C  | -3.53686 | -1.23679 | 0.25199  |
| C  | -3.79874 | 1.17699  | 0.52189  |
| C  | -4.90173 | -1.31587 | 0.02096  |
| C  | -5.16034 | 1.01055  | 0.28287  |
| C  | -5.72544 | -0.20168 | -0.07595 |
| H  | -5.34293 | -2.30085 | -0.06777 |
| H  | -5.80095 | 1.87376  | 0.39774  |
| C  | 2.74326  | 0.63526  | 1.12938  |
| C  | 3.46606  | -0.45899 | 1.66182  |
| C  | 3.38659  | 1.52546  | 0.23400  |
| C  | 4.68114  | -0.78817 | 1.06768  |
| C  | 4.59047  | 1.11674  | -0.33007 |
| C  | 5.22518  | -0.06800 | 0.01562  |
| H  | 5.21159  | -1.65528 | 1.42660  |
| H  | 5.06277  | 1.76065  | -1.06042 |
| C  | 3.01273  | -1.24993 | 2.90437  |
| C  | 2.92841  | 2.97112  | -0.06413 |
| C  | 6.49226  | -0.49958 | -0.71544 |
| C  | -3.41618 | 2.49777  | 1.22428  |
| C  | -2.85592 | -2.55743 | 0.67197  |
| C  | -7.19115 | -0.35651 | -0.46050 |
| C  | 4.16156  | 3.89182  | -0.09125 |
| H  | 3.82955  | 4.93129  | -0.15173 |
| H  | 4.76502  | 3.77809  | 0.81227  |
| H  | 4.80363  | 3.71361  | -0.95461 |
| C  | 2.02424  | 3.53634  | 1.03092  |
| H  | 1.03870  | 3.06299  | 1.06194  |
| H  | 2.48104  | 3.43920  | 2.01879  |
| H  | 1.84397  | 4.59824  | 0.84244  |

|    |          |          |          |
|----|----------|----------|----------|
| C  | 2.22470  | 3.09269  | -1.41770 |
| H  | 2.84362  | 2.68685  | -2.22155 |
| H  | 1.26845  | 2.56896  | -1.42216 |
| H  | 2.02860  | 4.14536  | -1.64333 |
| C  | 7.58034  | 0.56742  | -0.54956 |
| H  | 8.48870  | 0.26358  | -1.07749 |
| H  | 7.26902  | 1.53300  | -0.95334 |
| H  | 7.83106  | 0.70945  | 0.50469  |
| C  | 7.03777  | -1.82646 | -0.19427 |
| H  | 7.92371  | -2.10639 | -0.76946 |
| H  | 7.33524  | -1.76170 | 0.85560  |
| H  | 6.30645  | -2.63165 | -0.29762 |
| C  | 6.16632  | -0.66840 | -2.20455 |
| H  | 5.39613  | -1.42972 | -2.34971 |
| H  | 5.80550  | 0.26277  | -2.64674 |
| H  | 7.06063  | -0.97589 | -2.75403 |
| C  | 4.09252  | -2.22339 | 3.38426  |
| H  | 5.03922  | -1.71965 | 3.59361  |
| H  | 3.75354  | -2.68948 | 4.31234  |
| H  | 4.27370  | -3.02553 | 2.66514  |
| C  | 2.76244  | -0.26530 | 4.05558  |
| H  | 3.66337  | 0.31323  | 4.27491  |
| H  | 1.95584  | 0.43621  | 3.83356  |
| H  | 2.48135  | -0.81433 | 4.95883  |
| C  | 1.75454  | -2.08238 | 2.65223  |
| H  | 0.87514  | -1.45838 | 2.47816  |
| H  | 1.87331  | -2.73232 | 1.78425  |
| H  | 1.53858  | -2.69704 | 3.53148  |
| C  | -1.95567 | 2.59864  | 1.64310  |
| H  | -1.64092 | 1.71865  | 2.20773  |
| H  | -1.27861 | 2.73971  | 0.80410  |
| H  | -1.83252 | 3.46423  | 2.29920  |
| C  | -4.21795 | 2.49636  | 2.54408  |
| H  | -3.95674 | 3.38613  | 3.12348  |
| H  | -5.29530 | 2.50806  | 2.37704  |
| H  | -3.97835 | 1.61622  | 3.14555  |
| C  | -3.81259 | 3.74425  | 0.42869  |
| H  | -4.87745 | 3.75407  | 0.18864  |
| H  | -3.60325 | 4.63657  | 1.02498  |
| H  | -3.25521 | 3.82203  | -0.50378 |
| C  | -1.40559 | -2.41302 | 1.11518  |
| H  | -1.09333 | -3.33779 | 1.60668  |
| H  | -0.70990 | -2.25222 | 0.29406  |
| H  | -1.29762 | -1.60498 | 1.84300  |
| C  | -2.96245 | -3.65680 | -0.38659 |
| H  | -2.39415 | -3.40158 | -1.28000 |
| H  | -2.55980 | -4.58922 | 0.01796  |
| H  | -3.99796 | -3.84419 | -0.67876 |
| C  | -3.62442 | -3.01949 | 1.92957  |
| H  | -3.58350 | -2.26021 | 2.71466  |
| H  | -4.67331 | -3.23596 | 1.72412  |
| H  | -3.16180 | -3.93204 | 2.31474  |
| C  | -7.91821 | 0.98427  | -0.51850 |
| H  | -7.95734 | 1.47120  | 0.45932  |
| H  | -7.44660 | 1.66981  | -1.22694 |
| H  | -8.94866 | 0.82609  | -0.84531 |
| C  | -7.90522 | -1.24975 | 0.56091  |
| H  | -7.46615 | -2.24827 | 0.60559  |
| H  | -7.85722 | -0.81565 | 1.56262  |
| H  | -8.95831 | -1.36191 | 0.28858  |
| C  | -7.26830 | -1.00813 | -1.84655 |
| H  | -6.77598 | -0.38714 | -2.59864 |
| H  | -6.78917 | -1.98904 | -1.85844 |
| H  | -8.31280 | -1.13989 | -2.14217 |
| Sn | 1.34991  | -0.49570 | -1.93953 |
| S  | -1.27089 | -1.08018 | -2.09336 |

|    |          |         |          |
|----|----------|---------|----------|
| Cl | -1.60583 | 2.04713 | -1.59608 |
|----|----------|---------|----------|

**R-P=C(Sn(II)Cl)-P(S)MeR**

**R= H**

|    |          |          |          |
|----|----------|----------|----------|
| P  | 0.14006  | 1.22038  | 0.52450  |
| C  | 0.09232  | 0.53244  | -0.98295 |
| P  | -1.38030 | 0.05366  | -1.80612 |
| Cl | 1.46433  | -2.05666 | -2.65996 |
| Sn | 1.49981  | 0.36486  | -2.77288 |
| S  | -1.04351 | 0.56808  | -3.70953 |
| H  | 1.54755  | 1.48074  | 0.59750  |
| C  | -2.93538 | 0.68045  | -1.14607 |
| H  | -3.76232 | 0.28726  | -1.74018 |
| H  | -3.04507 | 0.36288  | -0.10656 |
| H  | -2.93290 | 1.76939  | -1.20107 |
| H  | -1.48855 | -1.34373 | -1.66450 |

**R = Me**

|    |          |          |          |
|----|----------|----------|----------|
| P  | 0.41911  | 0.55090  | 0.42353  |
| C  | 0.22966  | 0.21528  | -1.18559 |
| P  | -1.34575 | 0.06851  | -1.94670 |
| Cl | 1.49838  | -2.17341 | -3.31381 |
| Sn | 1.51654  | 0.25158  | -3.07401 |
| S  | -1.01458 | 0.67066  | -3.83869 |
| C  | 2.23661  | 0.62344  | 0.68954  |
| H  | 2.52588  | -0.21980 | 1.32396  |
| H  | 2.80823  | 0.58340  | -0.23856 |
| H  | 2.48441  | 1.53699  | 1.23630  |
| C  | -1.88183 | -1.65089 | -1.88715 |
| H  | -2.06262 | -1.94473 | -0.85088 |
| H  | -2.79358 | -1.76548 | -2.47638 |
| H  | -1.08763 | -2.26543 | -2.31463 |
| C  | -2.66387 | 1.02666  | -1.16818 |
| H  | -3.59105 | 0.88473  | -1.72684 |
| H  | -2.80148 | 0.69779  | -0.13578 |
| H  | -2.39119 | 2.08176  | -1.18230 |

**R = t-Bu**

|    |          |          |          |
|----|----------|----------|----------|
| P  | 0.56346  | -0.00369 | 0.24580  |
| C  | 0.20244  | 0.36965  | -1.32928 |
| P  | -1.46089 | 0.15893  | -1.90186 |
| Cl | 1.99211  | -0.47670 | -4.22735 |
| Sn | 1.07723  | 1.49596  | -3.13170 |
| S  | -1.51761 | 1.14443  | -3.66103 |
| C  | 2.38943  | 0.26495  | 0.56910  |
| C  | 2.46646  | 1.17307  | 1.79859  |
| H  | 3.50658  | 1.25859  | 2.13008  |
| H  | 2.10027  | 2.17947  | 1.57952  |
| H  | 1.88246  | 0.77518  | 2.63327  |
| C  | 2.93184  | -1.12273 | 0.92676  |
| H  | 3.96966  | -1.03368 | 1.26517  |
| H  | 2.35838  | -1.58846 | 1.73338  |
| H  | 2.91540  | -1.79341 | 0.06427  |
| C  | 3.18279  | 0.85521  | -0.58020 |
| H  | 4.23822  | 0.94156  | -0.29837 |
| H  | 3.13624  | 0.22421  | -1.47196 |
| H  | 2.83719  | 1.86118  | -0.83414 |
| C  | -1.94578 | -1.62226 | -2.12406 |
| C  | -0.88206 | -2.31237 | -2.97279 |
| C  | -2.05997 | -2.30479 | -0.76329 |
| C  | -3.29122 | -1.66273 | -2.84819 |
| H  | -0.75924 | -1.82804 | -3.94249 |
| H  | 0.09202  | -2.31834 | -2.48197 |
| H  | -1.18821 | -3.34897 | -3.14235 |

|   |          |          |          |
|---|----------|----------|----------|
| H | -2.87282 | -1.89496 | -0.16007 |
| H | -2.27187 | -3.36611 | -0.92299 |
| H | -1.13386 | -2.23524 | -0.18824 |
| H | -3.55922 | -2.70825 | -3.02581 |
| H | -4.09527 | -1.21418 | -2.25994 |
| H | -3.24184 | -1.15750 | -3.81433 |
| C | -2.65385 | 0.88669  | -0.74984 |
| H | -3.66676 | 0.78830  | -1.14226 |
| H | -2.57866 | 0.40864  | 0.22795  |
| H | -2.41236 | 1.94529  | -0.65323 |

**R = Ph**

|    |          |          |          |
|----|----------|----------|----------|
| P  | 0.80164  | 0.37975  | 0.54177  |
| C  | 0.30266  | -0.16374 | -0.94387 |
| P  | -1.36835 | -0.12300 | -1.47453 |
| C  | 2.58705  | 0.05599  | 0.56211  |
| C  | 3.17256  | -1.04326 | -0.07255 |
| C  | 3.39744  | 0.93346  | 1.28518  |
| C  | 4.54351  | -1.23510 | -0.01182 |
| C  | 4.76955  | 0.74550  | 1.33430  |
| C  | 5.34344  | -0.33756 | 0.68329  |
| H  | 4.98754  | -2.09344 | -0.50298 |
| H  | 5.39193  | 1.44109  | 1.88568  |
| C  | -2.19034 | -1.66598 | -1.00418 |
| C  | -2.66930 | -2.54059 | -1.97080 |
| C  | -2.33809 | -1.97222 | 0.34781  |
| C  | -3.30818 | -3.71043 | -1.58628 |
| C  | -2.97760 | -3.13982 | 0.72602  |
| C  | -3.46510 | -4.00856 | -0.24210 |
| H  | -3.67576 | -4.39393 | -2.34265 |
| H  | -3.08895 | -3.37731 | 1.77765  |
| Cl | 1.09664  | -2.91723 | -2.92846 |
| Sn | 1.33242  | -0.49623 | -2.94776 |
| S  | -1.25377 | 0.10492  | -3.46572 |
| H  | -1.93753 | -1.31029 | 1.10918  |
| H  | -2.52734 | -2.30583 | -3.01913 |
| H  | -3.96074 | -4.92560 | 0.05559  |
| H  | 2.54834  | -1.77109 | -0.58255 |
| H  | 2.94805  | 1.77521  | 1.80346  |
| H  | 6.41577  | -0.49045 | 0.72830  |
| C  | -2.35678 | 1.19026  | -0.72205 |
| H  | -3.36725 | 1.15215  | -1.13234 |
| H  | -2.39647 | 1.05941  | 0.36103  |
| H  | -1.89872 | 2.15084  | -0.95889 |

**R = Mes**

|   |          |          |          |
|---|----------|----------|----------|
| P | 0.93983  | 0.19335  | 1.07394  |
| C | 0.30451  | -0.24543 | -0.39465 |
| P | -1.36033 | -0.07448 | -0.95311 |
| C | 2.74335  | 0.02288  | 0.79747  |
| C | 3.35423  | -1.24122 | 0.75021  |
| C | 3.52497  | 1.18536  | 0.71346  |
| C | 4.73332  | -1.31034 | 0.58964  |
| C | 4.89917  | 1.06674  | 0.55170  |
| C | 5.52271  | -0.17240 | 0.47986  |
| H | 5.20570  | -2.28791 | 0.55681  |
| H | 5.49929  | 1.96956  | 0.48175  |
| C | -2.25582 | -1.67117 | -0.94718 |
| C | -2.89003 | -2.21766 | -2.08679 |
| C | -2.34293 | -2.35906 | 0.28282  |
| C | -3.56950 | -3.42287 | -1.95515 |
| C | -3.04186 | -3.55940 | 0.34630  |
| C | -3.65613 | -4.11802 | -0.75951 |
| H | -4.05419 | -3.83116 | -2.83636 |
| H | -3.10104 | -4.06975 | 1.30296  |

|    |          |          |          |
|----|----------|----------|----------|
| Cl | 0.86444  | -2.55201 | -2.92200 |
| Sn | 1.43610  | -0.24384 | -2.36070 |
| S  | -1.00358 | 0.81374  | -2.73139 |
| C  | -2.41709 | 1.07050  | -0.02102 |
| H  | -3.29932 | 1.26601  | -0.63421 |
| H  | -2.73451 | 0.66699  | 0.93920  |
| H  | -1.86888 | 2.00209  | 0.12359  |
| C  | 2.89703  | 2.54709  | 0.76570  |
| H  | 2.33017  | 2.75855  | -0.14644 |
| H  | 2.19777  | 2.63851  | 1.60281  |
| H  | 3.65593  | 3.32325  | 0.87348  |
| C  | 2.56573  | -2.51178 | 0.88119  |
| H  | 1.88915  | -2.47383 | 1.74045  |
| H  | 1.95082  | -2.70352 | -0.00267 |
| H  | 3.23301  | -3.36396 | 1.01652  |
| C  | 7.00241  | -0.27981 | 0.27250  |
| H  | 7.24050  | -0.33514 | -0.79446 |
| H  | 7.52612  | 0.58708  | 0.67947  |
| H  | 7.40666  | -1.17794 | 0.74304  |
| C  | -1.69734 | -1.92183 | 1.56627  |
| H  | -0.67029 | -2.29149 | 1.62146  |
| H  | -1.64475 | -0.84501 | 1.70873  |
| H  | -2.24440 | -2.33843 | 2.41335  |
| C  | -2.89606 | -1.61302 | -3.46029 |
| H  | -3.26815 | -0.58886 | -3.47103 |
| H  | -1.89223 | -1.59373 | -3.88632 |
| H  | -3.53271 | -2.21250 | -4.11206 |
| C  | -4.37222 | -5.42949 | -0.67724 |
| H  | -4.65532 | -5.66647 | 0.34948  |
| H  | -5.27379 | -5.42972 | -1.29313 |
| H  | -3.73157 | -6.23946 | -1.03939 |

**R = Mes\***

|    |          |          |          |
|----|----------|----------|----------|
| P  | 0.91279  | 0.90362  | 1.31404  |
| C  | 0.28475  | 0.37652  | -0.13009 |
| P  | -1.39171 | 0.31040  | -0.69050 |
| Cl | 1.84504  | -2.78716 | -0.86494 |
| C  | -2.98938 | 0.15191  | 0.23748  |
| C  | -3.58904 | -1.13855 | 0.30658  |
| C  | -3.83558 | 1.28303  | 0.38556  |
| C  | -4.95698 | -1.22724 | 0.08951  |
| C  | -5.19969 | 1.11296  | 0.16113  |
| C  | -5.77531 | -0.12089 | -0.09399 |
| H  | -5.40336 | -2.21390 | 0.07776  |
| H  | -5.83418 | 1.98745  | 0.20789  |
| C  | 2.73156  | 0.74027  | 1.02711  |
| C  | 3.43411  | -0.32083 | 1.64563  |
| C  | 3.40639  | 1.57091  | 0.09595  |
| C  | 4.66133  | -0.69537 | 1.10404  |
| C  | 4.62730  | 1.12761  | -0.40004 |
| C  | 5.24236  | -0.03953 | 0.03137  |
| H  | 5.17401  | -1.54385 | 1.52730  |
| H  | 5.12975  | 1.72514  | -1.14836 |
| C  | 2.95624  | -1.01924 | 2.93483  |
| C  | 2.94985  | 2.99067  | -0.31410 |
| C  | 6.52883  | -0.51763 | -0.63413 |
| C  | -3.43507 | 2.65218  | 0.97828  |
| C  | -2.91184 | -2.42949 | 0.81039  |
| C  | -7.24498 | -0.29816 | -0.45440 |
| C  | 4.17469  | 3.88134  | -0.57979 |
| H  | 3.84155  | 4.91543  | -0.69771 |
| H  | 4.88730  | 3.84524  | 0.24730  |
| H  | 4.69979  | 3.61308  | -1.49801 |
| C  | 2.17883  | 3.68110  | 0.81295  |
| H  | 1.21422  | 3.21071  | 1.02747  |
| H  | 2.75669  | 3.69216  | 1.74007  |

|    |          |          |          |
|----|----------|----------|----------|
| H  | 1.96364  | 4.71537  | 0.53025  |
| C  | 2.10405  | 2.99443  | -1.59000 |
| H  | 2.62977  | 2.49968  | -2.41034 |
| H  | 1.15455  | 2.48386  | -1.43622 |
| H  | 1.89399  | 4.02430  | -1.89535 |
| C  | 7.61818  | 0.55184  | -0.49465 |
| H  | 8.54058  | 0.21481  | -0.97620 |
| H  | 7.32535  | 1.49463  | -0.96132 |
| H  | 7.83701  | 0.75163  | 0.55736  |
| C  | 7.04941  | -1.81542 | -0.02204 |
| H  | 7.95129  | -2.13146 | -0.55208 |
| H  | 7.31376  | -1.69275 | 1.03150  |
| H  | 6.31667  | -2.62187 | -0.10282 |
| C  | 6.24893  | -0.76871 | -2.12101 |
| H  | 5.47698  | -1.53154 | -2.24765 |
| H  | 5.90964  | 0.13829  | -2.62596 |
| H  | 7.15746  | -1.11279 | -2.62360 |
| C  | 4.01406  | -1.97758 | 3.48899  |
| H  | 4.96767  | -1.47820 | 3.67642  |
| H  | 3.65708  | -2.37615 | 4.44147  |
| H  | 4.18764  | -2.82791 | 2.82544  |
| C  | 2.71945  | 0.04780  | 4.01338  |
| H  | 3.63054  | 0.62252  | 4.19853  |
| H  | 1.92849  | 0.74749  | 3.73608  |
| H  | 2.42207  | -0.43163 | 4.95052  |
| C  | 1.68369  | -1.84378 | 2.73611  |
| H  | 0.81534  | -1.21777 | 2.52276  |
| H  | 1.78992  | -2.55013 | 1.91181  |
| H  | 1.45927  | -2.39702 | 3.65328  |
| C  | -1.98715 | 2.73606  | 1.44667  |
| H  | -1.74384 | 1.91615  | 2.12490  |
| H  | -1.25082 | 2.73209  | 0.64668  |
| H  | -1.84197 | 3.66941  | 1.99665  |
| C  | -4.27243 | 2.80764  | 2.26633  |
| H  | -3.98679 | 3.73384  | 2.77266  |
| H  | -5.34284 | 2.85235  | 2.06518  |
| H  | -4.09119 | 1.97568  | 2.95056  |
| C  | -3.77335 | 3.83189  | 0.06159  |
| H  | -4.83471 | 3.84906  | -0.19357 |
| H  | -3.54366 | 4.77114  | 0.57205  |
| H  | -3.21223 | 3.81409  | -0.87243 |
| C  | -1.45564 | -2.25766 | 1.21952  |
| H  | -1.13202 | -3.14940 | 1.76197  |
| H  | -0.77790 | -2.14729 | 0.37550  |
| H  | -1.33692 | -1.40421 | 1.89132  |
| C  | -3.03772 | -3.59950 | -0.16772 |
| H  | -2.48840 | -3.40448 | -1.08763 |
| H  | -2.62438 | -4.50123 | 0.29196  |
| H  | -4.07896 | -3.80808 | -0.42374 |
| C  | -3.66535 | -2.79832 | 2.10668  |
| H  | -3.60960 | -1.98701 | 2.83701  |
| H  | -4.71826 | -3.02247 | 1.93084  |
| H  | -3.20207 | -3.68487 | 2.54781  |
| C  | -7.96383 | 1.03748  | -0.62460 |
| H  | -7.99306 | 1.60798  | 0.30731  |
| H  | -7.49265 | 1.65559  | -1.39302 |
| H  | -8.99752 | 0.85898  | -0.93007 |
| C  | -7.95688 | -1.09289 | 0.64682  |
| H  | -7.52190 | -2.08567 | 0.77705  |
| H  | -7.89891 | -0.57188 | 1.60566  |
| H  | -9.01260 | -1.22290 | 0.39304  |
| C  | -7.33857 | -1.06865 | -1.77690 |
| H  | -6.85082 | -0.51891 | -2.58546 |
| H  | -6.86366 | -2.04914 | -1.70707 |
| H  | -8.38630 | -1.22061 | -2.05073 |
| Sn | 1.28719  | -0.66682 | -1.93018 |

|   |          |          |          |
|---|----------|----------|----------|
| S | -1.32241 | -1.17446 | -2.07603 |
| C | -1.62008 | 1.77880  | -1.74502 |
| H | -1.52233 | 2.72776  | -1.22712 |
| H | -0.85373 | 1.70941  | -2.51788 |
| H | -2.59821 | 1.70351  | -2.22135 |

### E = Pb(II)

#### R-P=C(Pb(II)Cl)-P(O)ClR

##### R= H

|    |          |          |          |
|----|----------|----------|----------|
| P  | 0.74445  | 0.05730  | 1.03903  |
| C  | 0.55043  | -0.27560 | -0.56974 |
| P  | -0.95773 | -0.37109 | -1.42649 |
| O  | -0.66733 | 0.07034  | -2.84053 |
| Pb | 1.73236  | -0.22944 | -2.67214 |
| Cl | 1.56902  | -2.69827 | -2.96595 |
| H  | 2.17718  | 0.04900  | 1.08979  |
| H  | -1.48508 | -1.67128 | -1.35966 |
| Cl | -2.47867 | 0.68126  | -0.61557 |

##### R = Me

|    |          |          |          |
|----|----------|----------|----------|
| P  | 0.90353  | 0.29640  | 0.88416  |
| C  | 0.59512  | -0.21487 | -0.65421 |
| P  | -0.97078 | -0.31466 | -1.40622 |
| O  | -0.71293 | -0.16893 | -2.89395 |
| Pb | 1.63496  | -0.56190 | -2.79913 |
| Cl | 1.38963  | -3.05660 | -2.69189 |
| C  | 2.72968  | 0.17283  | 1.06806  |
| H  | 3.22820  | -0.19998 | 0.17321  |
| H  | 3.12791  | 1.15607  | 1.33520  |
| H  | 2.94833  | -0.49536 | 1.90646  |
| C  | -1.81928 | -1.83808 | -1.01086 |
| H  | -2.03960 | -1.88274 | 0.05590  |
| H  | -2.74275 | -1.88996 | -1.58971 |
| H  | -1.15491 | -2.65752 | -1.29672 |
| Cl | -2.26732 | 1.12589  | -0.78962 |

##### R = t-Bu

|   |          |          |          |
|---|----------|----------|----------|
| P | 0.71803  | 0.32595  | 0.23937  |
| C | 0.61858  | -0.62568 | -1.10658 |
| P | -0.85234 | -0.95388 | -1.99684 |
| O | -0.42158 | -1.77293 | -3.19872 |
| C | 2.49262  | 0.30287  | 0.84799  |
| C | 2.89865  | 1.77139  | 0.99339  |
| H | 2.96476  | 2.26999  | 0.02270  |
| H | 2.18634  | 2.32775  | 1.60888  |
| H | 3.87993  | 1.83917  | 1.47460  |
| C | 3.47680  | -0.43556 | -0.03781 |
| H | 3.22038  | -1.49544 | -0.12470 |
| H | 3.53080  | 0.01341  | -1.03486 |
| H | 4.48294  | -0.38091 | 0.39208  |
| C | 2.43285  | -0.35113 | 2.23179  |
| H | 2.16696  | -1.40878 | 2.16355  |
| H | 3.41257  | -0.27907 | 2.71603  |
| H | 1.70503  | 0.14293  | 2.88173  |
| C | -2.22046 | -1.77469 | -1.08997 |
| C | -2.75790 | -0.88298 | 0.02336  |
| H | -3.20346 | 0.03305  | -0.36749 |
| H | -3.53245 | -1.43205 | 0.56665  |
| H | -1.97992 | -0.60893 | 0.73973  |
| C | -3.31872 | -2.10472 | -2.10157 |
| H | -2.93690 | -2.71972 | -2.91792 |
| H | -4.10633 | -2.66470 | -1.58912 |
| H | -3.76567 | -1.20318 | -2.52442 |
| C | -1.64221 | -3.06758 | -0.50717 |



|    |          |          |          |
|----|----------|----------|----------|
| H  | -1.22879 | -3.71639 | -1.28043 |
| H  | -0.85383 | -2.87216 | 0.22137  |
| H  | -2.44828 | -3.60689 | -0.00128 |
| Cl | -1.66157 | 0.80348  | -2.65880 |
| Pb | 1.91623  | -1.86800 | -2.71183 |
| Cl | 1.88286  | -4.00331 | -1.38999 |

**R = Ph**

|    |          |          |          |
|----|----------|----------|----------|
| P  | 0.77895  | 0.43510  | 0.40549  |
| C  | 0.32367  | -0.22947 | -1.03787 |
| P  | -1.26032 | -0.32183 | -1.73818 |
| C  | 2.57399  | 0.15329  | 0.45781  |
| C  | 3.20263  | -0.94414 | -0.13848 |
| C  | 3.34777  | 1.07367  | 1.16726  |
| C  | 4.57748  | -1.09218 | -0.05541 |
| C  | 4.72505  | 0.93113  | 1.23710  |
| C  | 5.34081  | -0.15020 | 0.62350  |
| H  | 5.05405  | -1.95239 | -0.51194 |
| H  | 5.31814  | 1.66086  | 1.77647  |
| C  | -2.20162 | -1.73058 | -1.15809 |
| C  | -2.35347 | -2.81633 | -2.01514 |
| C  | -2.72839 | -1.77196 | 0.13137  |
| C  | -3.04103 | -3.93979 | -1.58059 |
| C  | -3.41189 | -2.89647 | 0.55687  |
| C  | -3.56870 | -3.97973 | -0.29973 |
| H  | -3.15925 | -4.78664 | -2.24622 |
| H  | -3.82524 | -2.92979 | 1.55812  |
| O  | -1.04373 | -0.36364 | -3.23593 |
| Pb | 1.35411  | -0.61546 | -3.16056 |
| Cl | 1.32205  | -3.12247 | -3.04755 |
| Cl | -2.41591 | 1.28092  | -1.24343 |
| H  | -1.92894 | -2.77856 | -3.01051 |
| H  | -4.10477 | -4.85984 | 0.03705  |
| H  | -2.60905 | -0.92489 | 0.79792  |
| H  | 2.60623  | -1.70529 | -0.63328 |
| H  | 2.86526  | 1.91361  | 1.65804  |
| H  | 6.41657  | -0.26873 | 0.68660  |

**R = Mes**

|   |          |          |          |
|---|----------|----------|----------|
| P | 0.79515  | 0.20083  | 1.11754  |
| C | 0.38237  | -0.45803 | -0.34086 |
| P | -1.08012 | -0.40723 | -1.28726 |
| C | 2.64565  | 0.13049  | 0.99246  |
| C | 3.35019  | -1.08751 | 1.16665  |
| C | 3.33831  | 1.28674  | 0.55543  |
| C | 4.64852  | -1.16318 | 0.67451  |
| C | 4.64601  | 1.12932  | 0.09281  |
| C | 5.30324  | -0.08999 | 0.08545  |
| H | 5.18016  | -2.09981 | 0.76543  |
| H | 5.17061  | 1.99646  | -0.27515 |
| C | 2.76254  | 2.72066  | 0.61839  |
| C | 2.80102  | -2.30812 | 1.93484  |
| C | 6.70913  | -0.27136 | -0.47968 |
| C | 1.96687  | -3.23106 | 1.03967  |
| H | 1.07002  | -2.74476 | 0.66029  |
| H | 2.54227  | -3.56772 | 0.17503  |
| H | 1.66344  | -4.11506 | 1.60884  |
| C | 1.97692  | -1.85882 | 3.14377  |
| H | 2.56163  | -1.21322 | 3.80397  |
| H | 1.06607  | -1.31622 | 2.87105  |
| H | 1.65291  | -2.73333 | 3.71420  |
| C | 3.94878  | -3.15387 | 2.50492  |
| H | 4.49846  | -3.69074 | 1.72938  |
| H | 4.65577  | -2.55081 | 3.08012  |
| H | 3.52847  | -3.90982 | 3.17216  |

|    |          |          |          |
|----|----------|----------|----------|
| C  | 1.70961  | 2.98764  | -0.46482 |
| H  | 0.80231  | 2.39828  | -0.33506 |
| H  | 1.41844  | 4.04153  | -0.43942 |
| H  | 2.11248  | 2.78012  | -1.46031 |
| C  | 2.16514  | 2.98575  | 2.00647  |
| H  | 1.31076  | 2.34471  | 2.23260  |
| H  | 2.91587  | 2.83426  | 2.78589  |
| H  | 1.81537  | 4.02004  | 2.06526  |
| C  | 3.85803  | 3.77536  | 0.42255  |
| H  | 4.68059  | 3.65014  | 1.13049  |
| H  | 4.26644  | 3.77284  | -0.59071 |
| H  | 3.42269  | 4.76314  | 0.58922  |
| C  | 7.25868  | 1.01353  | -1.09369 |
| H  | 7.35822  | 1.81100  | -0.35291 |
| H  | 8.25247  | 0.82361  | -1.50611 |
| H  | 6.62725  | 1.37710  | -1.90844 |
| C  | 6.67682  | -1.34861 | -1.57028 |
| H  | 6.31841  | -2.30554 | -1.18624 |
| H  | 6.02154  | -1.05358 | -2.39380 |
| H  | 7.68020  | -1.50520 | -1.97584 |
| C  | 7.65952  | -0.71280 | 0.63980  |
| H  | 7.34810  | -1.65881 | 1.08705  |
| H  | 8.67018  | -0.84772 | 0.24444  |
| H  | 7.70194  | 0.03646  | 1.43420  |
| C  | -2.18635 | -1.83366 | -1.13051 |
| C  | -2.51217 | -2.65507 | -2.24327 |
| C  | -2.72462 | -2.12904 | 0.14037  |
| C  | -3.34489 | -3.74416 | -2.02488 |
| C  | -3.55495 | -3.23402 | 0.27978  |
| C  | -3.87678 | -4.05783 | -0.78266 |
| H  | -3.58896 | -4.37616 | -2.86907 |
| H  | -3.96824 | -3.45843 | 1.25758  |
| C  | -2.07022 | -2.39512 | -3.67249 |
| C  | -3.03040 | -1.40946 | -4.34074 |
| C  | -1.92721 | -3.65629 | -4.51706 |
| H  | -1.08946 | -1.93099 | -3.64487 |
| H  | -3.07750 | -0.46336 | -3.79901 |
| H  | -2.70095 | -1.19436 | -5.36061 |
| H  | -4.04094 | -1.82638 | -4.39109 |
| H  | -1.30344 | -4.40243 | -4.02083 |
| H  | -2.88907 | -4.11239 | -4.76802 |
| H  | -1.44427 | -3.39638 | -5.46185 |
| C  | -2.48512 | -1.30730 | 1.39207  |
| C  | -1.87346 | -2.14745 | 2.51094  |
| C  | -3.77284 | -0.63287 | 1.86274  |
| H  | -1.77456 | -0.50993 | 1.17272  |
| H  | -0.96544 | -2.65377 | 2.17920  |
| H  | -1.62020 | -1.51082 | 3.36248  |
| H  | -2.57041 | -2.91046 | 2.86574  |
| H  | -4.20195 | -0.00569 | 1.07993  |
| H  | -4.52261 | -1.37370 | 2.15189  |
| H  | -3.57116 | -0.00310 | 2.73306  |
| C  | -4.77558 | -5.25529 | -0.59174 |
| C  | -4.03842 | -6.55955 | -0.88759 |
| C  | -6.04974 | -5.14431 | -1.42549 |
| H  | -5.06784 | -5.26857 | 0.46442  |
| H  | -3.14126 | -6.65733 | -0.27277 |
| H  | -4.68516 | -7.41818 | -0.68935 |
| H  | -3.73082 | -6.60895 | -1.93538 |
| H  | -6.59412 | -4.22488 | -1.19973 |
| H  | -5.82282 | -5.14442 | -2.49478 |
| H  | -6.71146 | -5.99132 | -1.22696 |
| O  | -0.56297 | -0.13075 | -2.68445 |
| Pb | 1.78436  | -0.55147 | -2.25974 |
| Cl | 1.60875  | -3.02126 | -2.72483 |
| Cl | -2.25786 | 1.21548  | -0.81818 |

**R = Mes\***

|    |          |          |          |
|----|----------|----------|----------|
| P  | 0.82808  | 1.22193  | 1.54125  |
| C  | 0.19234  | 0.55664  | 0.16708  |
| P  | -1.40756 | 0.24983  | -0.45924 |
| Cl | 1.79779  | -2.78639 | -0.37800 |
| O  | -1.21159 | -0.93874 | -1.37678 |
| C  | -3.05222 | 0.09550  | 0.33062  |
| C  | -3.59236 | -1.22399 | 0.36051  |
| C  | -3.94102 | 1.19363  | 0.45452  |
| C  | -4.94962 | -1.36544 | 0.11439  |
| C  | -5.29398 | 0.96284  | 0.21927  |
| C  | -5.81252 | -0.29079 | -0.05427 |
| H  | -5.35232 | -2.36858 | 0.06071  |
| H  | -5.96455 | 1.80972  | 0.25777  |
| C  | 2.62788  | 0.96562  | 1.20110  |
| C  | 3.31933  | -0.05202 | 1.89776  |
| C  | 3.25289  | 1.61114  | 0.10740  |
| C  | 4.47634  | -0.56870 | 1.31969  |
| C  | 4.38813  | 1.01419  | -0.43540 |
| C  | 4.98639  | -0.11176 | 0.11429  |
| H  | 4.97947  | -1.38339 | 1.81484  |
| H  | 4.83946  | 1.46483  | -1.31103 |
| C  | 2.87836  | -0.58378 | 3.27508  |
| C  | 2.86757  | 2.99745  | -0.45637 |
| C  | 6.17979  | -0.76153 | -0.57923 |
| C  | -3.60931 | 2.59796  | 0.99985  |
| C  | -2.84616 | -2.50560 | 0.78603  |
| C  | -7.26987 | -0.52605 | -0.43178 |
| C  | 4.14773  | 3.84952  | -0.53867 |
| H  | 3.88750  | 4.86386  | -0.85198 |
| H  | 4.64213  | 3.90927  | 0.43378  |
| H  | 4.86880  | 3.46352  | -1.25946 |
| C  | 1.91091  | 3.78604  | 0.43717  |
| H  | 0.89310  | 3.39176  | 0.42605  |
| H  | 2.26106  | 3.82185  | 1.47198  |
| H  | 1.84624  | 4.81510  | 0.07278  |
| C  | 2.26428  | 2.89523  | -1.85961 |
| H  | 2.91869  | 2.33990  | -2.53646 |
| H  | 1.28745  | 2.40756  | -1.83571 |
| H  | 2.12094  | 3.89410  | -2.28219 |
| C  | 7.32986  | 0.24581  | -0.69071 |
| H  | 8.18619  | -0.21424 | -1.19188 |
| H  | 7.04371  | 1.12887  | -1.26593 |
| H  | 7.65372  | 0.58000  | 0.29812  |
| C  | 6.68735  | -1.98936 | 0.17234  |
| H  | 7.51999  | -2.43402 | -0.37819 |
| H  | 7.05298  | -1.73448 | 1.17040  |
| H  | 5.90998  | -2.75059 | 0.27194  |
| C  | 5.75293  | -1.20560 | -1.98379 |
| H  | 4.93886  | -1.93282 | -1.92946 |
| H  | 5.41558  | -0.36088 | -2.58900 |
| H  | 6.59390  | -1.67268 | -2.50413 |
| C  | 3.94447  | -1.48840 | 3.89958  |
| H  | 4.91424  | -0.99054 | 3.97608  |
| H  | 3.62742  | -1.75393 | 4.91069  |
| H  | 4.07179  | -2.42065 | 3.34467  |
| C  | 2.68512  | 0.59695  | 4.23628  |
| H  | 3.60838  | 1.17374  | 4.33385  |
| H  | 1.89501  | 1.27560  | 3.90923  |
| H  | 2.40869  | 0.22611  | 5.22735  |
| C  | 1.59181  | -1.41184 | 3.19845  |
| H  | 0.71960  | -0.80366 | 2.94815  |
| H  | 1.67160  | -2.19847 | 2.44623  |
| H  | 1.39346  | -1.87037 | 4.17198  |
| C  | -2.15796 | 2.79155  | 1.41453  |

|    |          |          |          |
|----|----------|----------|----------|
| H  | -1.82312 | 1.99387  | 2.08107  |
| H  | -1.47824 | 2.85349  | 0.56767  |
| H  | -2.06471 | 3.73127  | 1.96499  |
| C  | -4.43064 | 2.74697  | 2.29750  |
| H  | -4.20569 | 3.71332  | 2.75716  |
| H  | -5.50537 | 2.70260  | 2.11933  |
| H  | -4.17444 | 1.96208  | 3.01322  |
| C  | -4.01807 | 3.71860  | 0.03949  |
| H  | -5.07979 | 3.67521  | -0.21051 |
| H  | -3.83064 | 4.68792  | 0.50981  |
| H  | -3.44984 | 3.67638  | -0.88923 |
| C  | -1.49612 | -2.23312 | 1.44435  |
| H  | -1.13525 | -3.15187 | 1.91276  |
| H  | -0.71982 | -1.93625 | 0.74453  |
| H  | -1.58635 | -1.47631 | 2.22834  |
| C  | -2.68550 | -3.49245 | -0.37307 |
| H  | -2.06827 | -3.06971 | -1.16309 |
| H  | -2.21110 | -4.40928 | -0.01256 |
| H  | -3.65680 | -3.76205 | -0.79619 |
| C  | -3.69593 | -3.18129 | 1.88219  |
| H  | -3.87891 | -2.50073 | 2.71759  |
| H  | -4.65962 | -3.53909 | 1.51908  |
| H  | -3.15085 | -4.04813 | 2.26397  |
| C  | -8.04429 | 0.77938  | -0.59247 |
| H  | -8.10538 | 1.33678  | 0.34576  |
| H  | -7.59404 | 1.42636  | -1.34946 |
| H  | -9.06684 | 0.55978  | -0.90865 |
| C  | -7.95622 | -1.36463 | 0.65301  |
| H  | -7.47813 | -2.33822 | 0.77689  |
| H  | -7.93049 | -0.85270 | 1.61812  |
| H  | -9.00272 | -1.53833 | 0.38726  |
| C  | -7.31855 | -1.28229 | -1.76488 |
| H  | -6.84561 | -0.70207 | -2.56077 |
| H  | -6.80539 | -2.24391 | -1.70310 |
| H  | -8.35652 | -1.47311 | -2.05129 |
| Pb | 1.20371  | -0.68090 | -1.63090 |
| Cl | -1.69114 | 1.82846  | -1.77198 |

**R-P=C(Pb (II)Cl)-P(O)MeR****R = H**

|    |          |          |          |
|----|----------|----------|----------|
| P  | 0.57719  | 0.06487  | 1.08137  |
| C  | 0.43195  | -0.24338 | -0.53713 |
| P  | -1.05550 | -0.22315 | -1.46700 |
| O  | -0.61193 | 0.07413  | -2.89411 |
| Pb | 1.70355  | -0.42060 | -2.56975 |
| Cl | 1.33322  | -2.88970 | -2.69871 |
| H  | 2.00296  | -0.01551 | 1.21088  |
| H  | -1.65547 | -1.49544 | -1.35495 |
| C  | -2.32447 | 0.91035  | -0.89512 |
| H  | -3.19926 | 0.83896  | -1.54409 |
| H  | -2.60628 | 0.65713  | 0.12965  |
| H  | -1.93352 | 1.92828  | -0.92316 |

**R = Me**

|    |          |          |          |
|----|----------|----------|----------|
| P  | 0.81455  | 0.15763  | 0.87749  |
| C  | 0.51441  | -0.22188 | -0.69918 |
| P  | -1.07241 | -0.25822 | -1.45304 |
| O  | -0.77434 | -0.12391 | -2.94909 |
| Pb | 1.54519  | -0.52136 | -2.84917 |
| Cl | 1.32359  | -3.02703 | -2.76717 |
| C  | -2.18107 | 1.04924  | -0.90422 |
| H  | -3.13210 | 0.97269  | -1.43523 |
| H  | -2.35320 | 0.96908  | 0.17108  |
| H  | -1.72429 | 2.01489  | -1.12341 |

|   |          |          |          |
|---|----------|----------|----------|
| C | -1.89022 | -1.81496 | -1.08704 |
| H | -2.10950 | -1.89008 | -0.02041 |
| H | -2.81544 | -1.88357 | -1.66339 |
| H | -1.21847 | -2.62331 | -1.38288 |
| C | 2.64358  | 0.06240  | 1.06766  |
| H | 3.15189  | -0.17844 | 0.13359  |
| H | 3.01592  | 1.01319  | 1.45940  |
| H | 2.87809  | -0.70388 | 1.81243  |

**R = t-Bu**

|    |          |          |          |
|----|----------|----------|----------|
| P  | 0.71160  | 0.32899  | 0.23787  |
| C  | 0.59668  | -0.62937 | -1.10041 |
| P  | -0.88212 | -0.89788 | -2.02446 |
| O  | -0.42580 | -1.72801 | -3.23005 |
| C  | 2.48595  | 0.29745  | 0.85597  |
| C  | 2.91407  | 1.76100  | 0.97888  |
| H  | 2.99021  | 2.24215  | 0.00002  |
| H  | 2.20794  | 2.33792  | 1.58270  |
| H  | 3.89499  | 1.82355  | 1.46190  |
| C  | 3.45871  | -0.46979 | -0.01782 |
| H  | 3.17990  | -1.52436 | -0.09785 |
| H  | 3.52490  | -0.03327 | -1.01948 |
| H  | 4.46415  | -0.43157 | 0.41587  |
| C  | 2.41789  | -0.33367 | 2.24943  |
| H  | 2.13575  | -1.38803 | 2.19722  |
| H  | 3.39843  | -0.26936 | 2.73342  |
| H  | 1.69667  | 0.18065  | 2.89103  |
| C  | -2.20508 | -1.78521 | -1.10162 |
| C  | -2.78357 | -0.89967 | -0.00160 |
| H  | -3.30319 | -0.02700 | -0.40383 |
| H  | -3.51143 | -1.47876 | 0.57455  |
| H  | -2.01321 | -0.55307 | 0.69211  |
| C  | -3.29153 | -2.16933 | -2.10873 |
| H  | -2.88146 | -2.76311 | -2.92731 |
| H  | -4.05167 | -2.76831 | -1.59832 |
| H  | -3.79302 | -1.29511 | -2.53107 |
| C  | -1.60072 | -3.05134 | -0.49564 |
| H  | -1.14888 | -3.69131 | -1.25479 |
| H  | -0.83103 | -2.82122 | 0.24257  |
| H  | -2.39404 | -3.61722 | 0.00221  |
| Pb | 1.87280  | -1.88272 | -2.71449 |
| Cl | 1.84279  | -4.04461 | -1.42485 |
| C  | -1.56846 | 0.67540  | -2.58495 |
| H  | -2.44364 | 0.50911  | -3.21493 |
| H  | -1.83226 | 1.30715  | -1.73588 |
| H  | -0.80101 | 1.17936  | -3.17423 |

**R = Ph**

|   |          |          |          |
|---|----------|----------|----------|
| P | 0.79562  | 0.36193  | 0.48366  |
| C | 0.34127  | -0.22534 | -0.99194 |
| P | -1.27111 | -0.27412 | -1.67372 |
| C | 2.59851  | 0.11740  | 0.52708  |
| C | 3.24014  | -0.95036 | -0.10638 |
| C | 3.36121  | 1.02405  | 1.26457  |
| C | 4.61737  | -1.08212 | -0.03151 |
| C | 4.74063  | 0.89838  | 1.32699  |
| C | 5.36991  | -0.15333 | 0.67661  |
| H | 5.10423  | -1.91980 | -0.51821 |
| H | 5.32502  | 1.61809  | 1.88907  |
| C | -2.16006 | -1.73103 | -1.09925 |
| C | -2.50150 | -2.71500 | -2.02082 |
| C | -2.50119 | -1.88585 | 0.24293  |
| C | -3.19252 | -3.84257 | -1.60171 |
| C | -3.19243 | -3.01163 | 0.65593  |
| C | -3.53984 | -3.98948 | -0.26788 |

|    |          |          |          |
|----|----------|----------|----------|
| H  | -3.45260 | -4.61134 | -2.32001 |
| H  | -3.45487 | -3.13186 | 1.70069  |
| O  | -1.04402 | -0.33395 | -3.18361 |
| Pb | 1.32285  | -0.62291 | -3.13483 |
| Cl | 1.29171  | -3.13184 | -2.97939 |
| H  | -2.21357 | -2.59367 | -3.05808 |
| H  | -4.07680 | -4.87319 | 0.05792  |
| H  | -2.21228 | -1.13608 | 0.97299  |
| H  | 2.65239  | -1.70107 | -0.62691 |
| H  | 2.86864  | 1.84054  | 1.78427  |
| H  | 6.44740  | -0.25900 | 0.73334  |
| C  | -2.28952 | 1.14378  | -1.23148 |
| H  | -3.25653 | 1.06401  | -1.73122 |
| H  | -2.43967 | 1.18226  | -0.15093 |
| H  | -1.78308 | 2.05385  | -1.55612 |

**R = Mes**

|    |          |          |          |
|----|----------|----------|----------|
| P  | 0.89816  | 0.15221  | 1.03172  |
| C  | 0.32391  | -0.26795 | -0.45866 |
| P  | -1.25573 | -0.19972 | -1.23136 |
| C  | 2.71612  | 0.05992  | 0.78737  |
| C  | 3.37570  | -1.17917 | 0.72813  |
| C  | 3.45358  | 1.25208  | 0.72733  |
| C  | 4.75751  | -1.19308 | 0.57274  |
| C  | 4.83280  | 1.18878  | 0.56916  |
| C  | 5.50363  | -0.02442 | 0.48175  |
| H  | 5.26702  | -2.15164 | 0.53222  |
| H  | 5.39884  | 2.11484  | 0.52023  |
| C  | -2.19996 | -1.74173 | -1.06016 |
| C  | -2.68591 | -2.42826 | -2.19641 |
| C  | -2.48944 | -2.24003 | 0.22533  |
| C  | -3.43506 | -3.58271 | -2.00198 |
| C  | -3.24740 | -3.39791 | 0.35433  |
| C  | -3.72523 | -4.09107 | -0.74467 |
| H  | -3.80901 | -4.10235 | -2.87885 |
| H  | -3.46710 | -3.76477 | 1.35264  |
| O  | -0.87795 | 0.12346  | -2.67849 |
| Pb | 1.46811  | -0.24999 | -2.53495 |
| Cl | 1.33453  | -2.74237 | -2.90906 |
| C  | -2.32667 | 1.13719  | -0.65384 |
| H  | -3.17842 | 1.19874  | -1.33454 |
| H  | -2.69120 | 0.98467  | 0.36083  |
| H  | -1.76180 | 2.06955  | -0.70314 |
| C  | 2.77724  | 2.58978  | 0.81267  |
| H  | 2.20719  | 2.81065  | -0.09517 |
| H  | 2.07016  | 2.63228  | 1.64685  |
| H  | 3.50821  | 3.38813  | 0.94852  |
| C  | 2.63498  | -2.47927 | 0.84307  |
| H  | 1.91311  | -2.45685 | 1.66482  |
| H  | 2.07557  | -2.70891 | -0.06825 |
| H  | 3.32960  | -3.30038 | 1.02566  |
| C  | 6.98799  | -0.07368 | 0.28390  |
| H  | 7.23581  | -0.16442 | -0.77843 |
| H  | 7.47020  | 0.83175  | 0.65649  |
| H  | 7.42913  | -0.93230 | 0.79378  |
| C  | -1.99522 | -1.62332 | 1.50133  |
| H  | -1.00207 | -2.00570 | 1.75287  |
| H  | -1.90824 | -0.53874 | 1.47313  |
| H  | -2.66467 | -1.87954 | 2.32406  |
| C  | -2.44993 | -2.01438 | -3.62102 |
| H  | -2.71160 | -0.97390 | -3.80766 |
| H  | -1.39769 | -2.12733 | -3.88799 |
| H  | -3.04095 | -2.64883 | -4.28281 |
| C  | -4.51137 | -5.35525 | -0.58684 |
| H  | -3.86658 | -6.22872 | -0.72491 |
| H  | -4.95624 | -5.42764 | 0.40688  |

H -5.31004 -5.42214 -1.32837

**R = Mes\***

P 0.82879 1.48234 1.26754  
C 0.15935 0.63147 0.01926  
P -1.45955 0.32219 -0.61474  
Cl 1.67199 -2.84891 -0.07728  
O -1.25105 -0.98729 -1.38820  
C -3.08183 0.19408 0.25944  
C -3.63270 -1.11172 0.40286  
C -3.97380 1.29703 0.30215  
C -4.99368 -1.26983 0.18050  
C -5.33101 1.05765 0.09719  
C -5.85718 -0.21192 -0.06789  
H -5.39764 -2.27353 0.21254  
H -5.99904 1.90761 0.07744  
C 2.62795 1.12244 1.00267  
C 3.26592 0.17884 1.83984  
C 3.32212 1.63929 -0.12069  
C 4.43929 -0.41617 1.38043  
C 4.48278 0.98548 -0.52307  
C 5.02677 -0.08803 0.17016  
H 4.89841 -1.18254 1.98356  
H 4.99852 1.34015 -1.40540  
C 2.76682 -0.17687 3.25533  
C 2.95125 2.94504 -0.86230  
C 6.24919 -0.81535 -0.38155  
C -3.63076 2.73747 0.73828  
C -2.88525 -2.35548 0.92280  
C -7.31982 -0.47282 -0.40753  
C 4.22596 3.65241 -1.35072  
H 3.96097 4.64546 -1.72192  
H 4.95295 3.77304 -0.54449  
H 4.71176 3.12726 -2.17477  
C 2.25397 3.94538 0.06207  
H 1.26039 3.61718 0.38156  
H 2.84694 4.13623 0.95950  
H 2.11380 4.89371 -0.46414  
C 2.07235 2.69297 -2.09112  
H 2.54913 1.98494 -2.77486  
H 1.09740 2.29986 -1.80384  
H 1.91471 3.62785 -2.63776  
C 7.41974 0.16446 -0.52156  
H 8.29744 -0.35138 -0.92134  
H 7.18233 0.98876 -1.19737  
H 7.68865 0.59212 0.44756  
C 6.69149 -1.96709 0.51736  
H 7.54797 -2.47318 0.06510  
H 7.00110 -1.61758 1.50566  
H 5.89733 -2.70654 0.64503  
C 5.90128 -1.39316 -1.75898  
H 5.07536 -2.10489 -1.68350  
H 5.61111 -0.61009 -2.46320  
H 6.76531 -1.91617 -2.17879  
C 3.78167 -1.03746 4.01368  
H 4.76534 -0.56471 4.06871  
H 3.42372 -1.17689 5.03635  
H 3.89345 -2.03001 3.57128  
C 2.59566 1.11514 4.06641  
H 3.53812 1.66591 4.12339  
H 1.84143 1.77820 3.63824  
H 2.28003 0.87316 5.08533  
C 1.45283 -0.96379 3.24384  
H 0.60810 -0.36069 2.90585  
H 1.51835 -1.83496 2.58984  
H 1.22111 -1.30011 4.25908

C -2.17991 2.94255 1.15139  
H -1.86963 2.20070 1.88964  
H -1.47194 2.91051 0.32627  
H -2.07210 3.92666 1.61449  
C -4.45159 3.00013 2.01823  
H -4.21318 3.99519 2.40423  
H -5.52641 2.95788 1.84080  
H -4.20824 2.26773 2.79136  
C -4.03293 3.78733 -0.30241  
H -5.09968 3.74289 -0.52980  
H -3.82057 4.78836 0.08309  
H -3.49278 3.66942 -1.24237  
C -1.54802 -2.01268 1.57050  
H -1.14484 -2.90247 2.05946  
H -0.78958 -1.69615 0.86101  
H -1.67138 -1.23841 2.33244  
C -2.70707 -3.42238 -0.16058  
H -2.08859 -3.05239 -0.97502  
H -2.22839 -4.30669 0.26901  
H -3.67461 -3.72916 -0.56760  
C -3.73529 -2.96400 2.05709  
H -3.95165 -2.22485 2.83259  
H -4.68185 -3.37936 1.70950  
H -3.17278 -3.78132 2.51530  
C -8.09528 0.81794 -0.65736  
H -8.14123 1.44660 0.23562  
H -7.65596 1.40353 -1.46896  
H -9.12290 0.57736 -0.94023  
C -7.99340 -1.22418 0.74688  
H -7.51366 -2.18558 0.93989  
H -7.95518 -0.63919 1.66909  
H -9.04327 -1.41681 0.50860  
C -7.38813 -1.32911 -1.67759  
H -6.92846 -0.81149 -2.52310  
H -6.87196 -2.28253 -1.54971  
H -8.42986 -1.54219 -1.93329  
Pb 1.13139 -0.88917 -1.57129  
C -1.76499 1.55736 -1.91062  
H -2.71105 1.30804 -2.39403  
H -1.78183 2.58960 -1.57571  
H -0.96158 1.43475 -2.64012

**R-P=C(Pb (II)Cl)-P(S)ClR**

**R= H**

P 0.74871 0.04774 0.96749  
C 0.51241 -0.19479 -0.65348  
P -1.01470 -0.17429 -1.46940  
Cl 1.34246 -2.39598 -3.30894  
S -0.77704 0.89634 -3.12061  
Pb 1.83625 -0.02934 -2.65369  
Cl -2.61637 0.40895 -0.36347  
H -1.37814 -1.50343 -1.74085  
H 2.18077 -0.01977 0.97674

**R = Me**

P 0.85708 0.09546 0.86656  
C 0.40926 -0.14225 -0.70699  
P -1.21792 -0.05270 -1.29730  
Cl 1.06477 -2.44622 -3.42202  
S -1.12784 0.85769 -3.06996  
Pb 1.48879 -0.02731 -2.85354  
Cl -2.51752 0.91357 -0.04756  
C -1.93483 -1.69563 -1.40454  
H -2.00721 -2.12524 -0.40437  
H -2.92301 -1.62015 -1.85971

|   |          |          |          |
|---|----------|----------|----------|
| H | -1.27399 | -2.29825 | -2.03309 |
| C | 2.68576  | -0.10864 | 0.86956  |
| H | 2.95232  | -0.81893 | 1.65732  |
| H | 3.08700  | -0.46168 | -0.08088 |
| H | 3.14858  | 0.84675  | 1.13478  |

**R = t-Bu**

|    |          |          |          |
|----|----------|----------|----------|
| P  | 0.79418  | -0.23939 | 0.99108  |
| C  | 0.55038  | -0.37410 | -0.64262 |
| P  | -1.04871 | -0.28939 | -1.33460 |
| Cl | 2.12840  | -2.46651 | -3.29289 |
| S  | -0.84605 | 0.33942  | -3.22114 |
| Pb | 1.83257  | -0.04787 | -2.66087 |
| C  | 2.63854  | -0.43504 | 1.29686  |
| C  | 2.79055  | -0.50598 | 2.81750  |
| H  | 2.25692  | -1.36385 | 3.23533  |
| H  | 3.84744  | -0.60844 | 3.08255  |
| H  | 2.40674  | 0.39448  | 3.30471  |
| C  | 3.17796  | -1.71261 | 0.66518  |
| H  | 2.67116  | -2.59746 | 1.05903  |
| H  | 3.05926  | -1.73175 | -0.41980 |
| H  | 4.24527  | -1.81458 | 0.89071  |
| C  | 3.37613  | 0.79575  | 0.77570  |
| H  | 3.33262  | 0.87246  | -0.31340 |
| H  | 2.96921  | 1.72203  | 1.19073  |
| H  | 4.43294  | 0.74052  | 1.05887  |
| C  | -1.99417 | -1.88315 | -1.21767 |
| C  | -2.22666 | -2.24282 | 0.24611  |
| H  | -2.74477 | -3.20533 | 0.28362  |
| H  | -1.28828 | -2.34941 | 0.79399  |
| H  | -2.84537 | -1.50507 | 0.75834  |
| C  | -1.15651 | -2.96280 | -1.90098 |
| H  | -0.96189 | -2.72922 | -2.94831 |
| H  | -0.19431 | -3.11290 | -1.40973 |
| H  | -1.71316 | -3.90361 | -1.85870 |
| C  | -3.32365 | -1.70931 | -1.94821 |
| H  | -3.85348 | -2.66585 | -1.92902 |
| H  | -3.95847 | -0.96115 | -1.47082 |
| H  | -3.17399 | -1.42780 | -2.99212 |
| Cl | -2.25111 | 1.02764  | -0.31575 |

**R = Ph**

|    |          |          |          |
|----|----------|----------|----------|
| P  | 0.78402  | 0.16093  | 0.70147  |
| C  | 0.21854  | 0.05726  | -0.85205 |
| P  | -1.45817 | 0.20272  | -1.29328 |
| C  | 2.58883  | -0.01337 | 0.53080  |
| C  | 3.24827  | -0.88530 | 1.39721  |
| C  | 3.34223  | 0.73113  | -0.37871 |
| C  | 4.62189  | -1.05362 | 1.31591  |
| C  | 4.71789  | 0.57616  | -0.44687 |
| C  | 5.35798  | -0.32527 | 0.39260  |
| H  | 5.12017  | -1.75072 | 1.97987  |
| H  | 5.29386  | 1.16578  | -1.15122 |
| C  | -2.31243 | -1.37778 | -1.15393 |
| C  | -2.84874 | -1.98644 | -2.28101 |
| C  | -2.40940 | -1.99284 | 0.09329  |
| C  | -3.49226 | -3.20900 | -2.15820 |
| C  | -3.05205 | -3.21162 | 0.20726  |
| C  | -3.59439 | -3.81941 | -0.91892 |
| H  | -3.90642 | -3.68682 | -3.03804 |
| H  | -3.12899 | -3.69136 | 1.17595  |
| Cl | 0.61905  | -2.41693 | -3.47393 |
| S  | -1.50499 | 0.96637  | -3.12798 |
| Pb | 1.13363  | 0.00447  | -3.07471 |
| Cl | -2.50116 | 1.38942  | 0.00996  |

|   |          |          |          |
|---|----------|----------|----------|
| H | 2.85190  | 1.46457  | -1.01051 |
| H | 6.43330  | -0.44910 | 0.33643  |
| H | 2.67941  | -1.44782 | 2.13107  |
| H | -4.09452 | -4.77683 | -0.82682 |
| H | -2.75075 | -1.50798 | -3.24757 |
| H | -1.98519 | -1.51969 | 0.97220  |

**R = Mes**

|    |          |          |          |
|----|----------|----------|----------|
| P  | 0.89425  | -0.84034 | 0.25596  |
| C  | 0.34399  | -0.24001 | -1.18742 |
| P  | -1.33442 | -0.14580 | -1.68059 |
| C  | 2.68921  | -0.48949 | 0.17647  |
| C  | 3.58419  | -1.53631 | -0.08576 |
| C  | 3.17111  | 0.79516  | 0.47456  |
| C  | 4.94824  | -1.27173 | -0.08052 |
| C  | 4.54361  | 1.01247  | 0.46899  |
| C  | 5.44854  | -0.00403 | 0.18579  |
| H  | 5.63894  | -2.08356 | -0.28977 |
| H  | 4.91728  | 2.00450  | 0.70684  |
| C  | -2.46420 | -1.43862 | -1.07568 |
| C  | -2.05574 | -2.75577 | -1.40517 |
| C  | -3.65173 | -1.24372 | -0.33507 |
| C  | -2.78349 | -3.82800 | -0.90562 |
| C  | -4.33432 | -2.36495 | 0.12415  |
| C  | -3.91273 | -3.66144 | -0.12206 |
| H  | -2.45325 | -4.83088 | -1.15718 |
| H  | -5.24421 | -2.20828 | 0.69482  |
| Cl | 2.21253  | -1.68861 | -3.91736 |
| S  | -1.33557 | 0.04714  | -3.65942 |
| Pb | 1.39308  | 0.57502  | -3.16811 |
| C  | 2.24485  | 1.92475  | 0.82280  |
| H  | 1.63890  | 2.23731  | -0.03183 |
| H  | 1.54049  | 1.63870  | 1.61016  |
| H  | 2.80767  | 2.79087  | 1.17350  |
| C  | 3.09103  | -2.91502 | -0.40292 |
| H  | 2.26114  | -3.20765 | 0.24914  |
| H  | 2.73082  | -2.96343 | -1.43529 |
| H  | 3.88682  | -3.65244 | -0.28778 |
| C  | 6.92236  | 0.26348  | 0.15515  |
| H  | 7.49226  | -0.61057 | 0.47593  |
| H  | 7.25051  | 0.51132  | -0.85928 |
| H  | 7.18912  | 1.10296  | 0.79969  |
| C  | -4.29499 | 0.07703  | -0.01792 |
| H  | -3.74189 | 0.63696  | 0.73733  |
| H  | -4.38689 | 0.71608  | -0.89549 |
| H  | -5.29749 | -0.10282 | 0.37092  |
| C  | -0.92453 | -3.09295 | -2.33143 |
| H  | -1.22134 | -2.92523 | -3.36971 |
| H  | -0.02166 | -2.50587 | -2.17380 |
| H  | -0.65887 | -4.14491 | -2.22213 |
| C  | -4.65132 | -4.83650 | 0.43647  |
| H  | -5.71065 | -4.61329 | 0.57406  |
| H  | -4.56249 | -5.70869 | -0.21341 |
| H  | -4.24517 | -5.11429 | 1.41421  |
| Cl | -1.85083 | 1.66595  | -0.86403 |

**R = Mes\***

|    |          |          |          |
|----|----------|----------|----------|
| P  | 0.74522  | 0.93626  | 1.54586  |
| C  | 0.16324  | 0.40292  | 0.08533  |
| P  | -1.47077 | 0.22155  | -0.50518 |
| Cl | 1.93334  | -2.81819 | -0.60362 |
| C  | -3.09872 | 0.08853  | 0.35677  |
| C  | -3.66458 | -1.21958 | 0.42708  |
| C  | -3.97027 | 1.20243  | 0.47962  |
| C  | -5.02286 | -1.34279 | 0.17796  |

|   |          |          |          |
|---|----------|----------|----------|
| C | -5.32352 | 0.99238  | 0.22565  |
| C | -5.86145 | -0.25630 | -0.03582 |
| H | -5.44687 | -2.33919 | 0.16849  |
| H | -5.97972 | 1.85129  | 0.24946  |
| C | 2.56555  | 0.80541  | 1.25494  |
| C | 3.28936  | -0.23331 | 1.88704  |
| C | 3.20392  | 1.59657  | 0.26805  |
| C | 4.49906  | -0.62485 | 1.31965  |
| C | 4.39965  | 1.12537  | -0.26667 |
| C | 5.03540  | -0.01933 | 0.19418  |
| H | 5.02808  | -1.45546 | 1.75784  |
| H | 4.86553  | 1.68936  | -1.06487 |
| C | 2.83560  | -0.90650 | 3.19659  |
| C | 2.75583  | 3.00822  | -0.17337 |
| C | 6.29293  | -0.53102 | -0.50122 |
| C | -3.62566 | 2.58412  | 1.07672  |
| C | -2.97194 | -2.48717 | 0.97350  |
| C | -7.31545 | -0.47127 | -0.43573 |
| C | 3.99154  | 3.92599  | -0.20857 |
| H | 3.67021  | 4.95322  | -0.39856 |
| H | 4.52630  | 3.90642  | 0.74384  |
| H | 4.69555  | 3.66044  | -0.99770 |
| C | 1.78942  | 3.66725  | 0.80980  |
| H | 0.79827  | 3.20823  | 0.80851  |
| H | 2.17850  | 3.64675  | 1.83078  |
| H | 1.64211  | 4.71310  | 0.52658  |
| C | 2.12869  | 3.00242  | -1.56969 |
| H | 2.79525  | 2.53686  | -2.30046 |
| H | 1.17546  | 2.47138  | -1.57626 |
| H | 1.93705  | 4.02764  | -1.90035 |
| C | 7.38432  | 0.54474  | -0.46646 |
| H | 8.28601  | 0.18224  | -0.96808 |
| H | 7.07012  | 1.46115  | -0.97037 |
| H | 7.64760  | 0.80116  | 0.56275  |
| C | 6.84280  | -1.79505 | 0.15443  |
| H | 7.72274  | -2.13664 | -0.39613 |
| H | 7.15089  | -1.61759 | 1.18807  |
| H | 6.10977  | -2.60514 | 0.14559  |
| C | 5.94780  | -0.86112 | -1.95875 |
| H | 5.17768  | -1.63496 | -2.00868 |
| H | 5.58178  | 0.01738  | -2.49519 |
| H | 6.83479  | -1.22718 | -2.48360 |
| C | 3.91881  | -1.82599 | 3.76705  |
| H | 4.86458  | -1.30194 | 3.92506  |
| H | 3.58215  | -2.20053 | 4.73647  |
| H | 4.10056  | -2.69386 | 3.12903  |
| C | 2.57443  | 0.17734  | 4.25173  |
| H | 3.47212  | 0.77643  | 4.42453  |
| H | 1.76731  | 0.85278  | 3.96141  |
| H | 2.28827  | -0.28880 | 5.19886  |
| C | 1.58318  | -1.76656 | 3.01334  |
| H | 0.69710  | -1.16393 | 2.80219  |
| H | 1.70362  | -2.47566 | 2.19283  |
| H | 1.37910  | -2.31872 | 3.93582  |
| C | -2.17906 | 2.74145  | 1.52560  |
| H | -1.86967 | 1.91576  | 2.16971  |
| H | -1.48075 | 2.82129  | 0.69633  |
| H | -2.08518 | 3.66037  | 2.11015  |
| C | -4.46423 | 2.68351  | 2.36966  |
| H | -4.23038 | 3.62320  | 2.87761  |
| H | -5.53655 | 2.66513  | 2.17350  |
| H | -4.23082 | 1.86144  | 3.05052  |
| C | -4.01544 | 3.75226  | 0.16723  |
| H | -5.07335 | 3.72503  | -0.10071 |
| H | -3.83431 | 4.69542  | 0.69010  |
| H | -3.43371 | 3.75847  | -0.75351 |

|    |          |          |          |
|----|----------|----------|----------|
| C  | -1.53021 | -2.28470 | 1.42235  |
| H  | -1.21527 | -3.15691 | 2.00054  |
| H  | -0.82408 | -2.19131 | 0.59953  |
| H  | -1.44165 | -1.41238 | 2.07451  |
| C  | -3.04692 | -3.67806 | 0.01601  |
| H  | -2.47203 | -3.49212 | -0.89024 |
| H  | -2.63302 | -4.56329 | 0.50617  |
| H  | -4.07533 | -3.90978 | -0.26941 |
| C  | -3.75389 | -2.84621 | 2.25611  |
| H  | -3.73320 | -2.02025 | 2.97160  |
| H  | -4.79719 | -3.09244 | 2.05562  |
| H  | -3.28727 | -3.71564 | 2.72680  |
| C  | -8.06037 | 0.84549  | -0.63773 |
| H  | -8.13106 | 1.42180  | 0.28835  |
| H  | -7.58084 | 1.46897  | -1.39641 |
| H  | -9.07989 | 0.63975  | -0.97237 |
| C  | -8.03968 | -1.27480 | 0.65099  |
| H  | -7.58602 | -2.25638 | 0.80127  |
| H  | -8.02163 | -0.74574 | 1.60701  |
| H  | -9.08433 | -1.43117 | 0.36800  |
| C  | -7.35129 | -1.25349 | -1.75426 |
| H  | -6.85124 | -0.69868 | -2.55164 |
| H  | -6.85702 | -2.22257 | -1.66209 |
| H  | -8.38661 | -1.43106 | -2.05818 |
| Pb | 1.33865  | -0.63325 | -1.74063 |
| S  | -1.38011 | -1.22332 | -1.88202 |
| Cl | -1.72023 | 1.93682  | -1.64758 |

**R-P=C(Pb (II)Cl)-P(S)MeR**

**R= H**

|    |          |          |          |
|----|----------|----------|----------|
| P  | 0.79861  | 0.14024  | 0.92090  |
| C  | 0.57712  | -0.11003 | -0.70244 |
| P  | -0.96794 | 0.06825  | -1.51186 |
| Cl | 1.13412  | -2.53069 | -3.18031 |
| S  | -0.54924 | 1.00005  | -3.23155 |
| Pb | 1.92382  | -0.19977 | -2.67023 |
| H  | -1.44158 | -1.23828 | -1.74369 |
| H  | 2.21951  | -0.03976 | 0.98483  |
| C  | -2.29790 | 0.85387  | -0.58169 |
| H  | -3.20337 | 0.86568  | -1.19090 |
| H  | -2.48028 | 0.29559  | 0.33935  |
| H  | -2.00818 | 1.87714  | -0.34111 |

**R = Me**

|    |          |          |          |
|----|----------|----------|----------|
| P  | 0.83802  | 0.16745  | 0.73298  |
| C  | 0.46929  | -0.09996 | -0.85651 |
| P  | -1.16420 | 0.04982  | -1.48109 |
| Cl | 1.12237  | -2.66916 | -3.28127 |
| S  | -0.94247 | 0.73910  | -3.35907 |
| Pb | 1.62251  | -0.21327 | -2.94781 |
| C  | -1.93920 | -1.57735 | -1.46990 |
| H  | -2.06955 | -1.91631 | -0.43988 |
| H  | -2.90574 | -1.51949 | -1.97386 |
| H  | -1.28505 | -2.26691 | -2.00735 |
| C  | 2.65883  | -0.07042 | 0.85725  |
| H  | 2.86192  | -0.81153 | 1.63543  |
| H  | 3.11050  | -0.40168 | -0.07859 |
| H  | 3.12239  | 0.86653  | 1.17936  |
| C  | -2.25609 | 1.12380  | -0.52210 |
| H  | -3.23905 | 1.15335  | -0.99608 |
| H  | -2.34945 | 0.74444  | 0.49779  |
| H  | -1.83552 | 2.12903  | -0.50019 |

**R = t-Bu**

|   |         |          |         |
|---|---------|----------|---------|
| P | 0.77519 | -0.32421 | 0.95824 |
|---|---------|----------|---------|

|    |          |          |          |
|----|----------|----------|----------|
| C  | 0.54329  | -0.35273 | -0.68195 |
| P  | -1.08895 | -0.24904 | -1.34722 |
| Cl | 2.15488  | -2.43787 | -3.27905 |
| S  | -0.86274 | 0.31285  | -3.27332 |
| Pb | 1.81062  | -0.00590 | -2.69559 |
| C  | -2.08973 | 0.98379  | -0.47499 |
| H  | -3.08243 | 1.04922  | -0.92204 |
| H  | -2.16700 | 0.73224  | 0.58378  |
| H  | -1.58938 | 1.94645  | -0.58057 |
| C  | 2.62489  | -0.44221 | 1.27854  |
| C  | 2.77546  | -0.49504 | 2.79946  |
| H  | 2.25929  | -1.36012 | 3.22429  |
| H  | 3.83374  | -0.57158 | 3.06820  |
| H  | 2.37104  | 0.40162  | 3.27727  |
| C  | 3.19312  | -1.71447 | 0.65926  |
| H  | 2.70552  | -2.60633 | 1.06205  |
| H  | 3.07331  | -1.74449 | -0.42544 |
| H  | 4.26236  | -1.79109 | 0.88647  |
| C  | 3.33648  | 0.79686  | 0.74476  |
| H  | 3.28800  | 0.86228  | -0.34459 |
| H  | 2.91183  | 1.71819  | 1.15292  |
| H  | 4.39539  | 0.76562  | 1.02430  |
| C  | -2.00616 | -1.86205 | -1.22920 |
| C  | -2.30854 | -2.17618 | 0.23387  |
| H  | -2.77500 | -3.16415 | 0.28881  |
| H  | -1.40283 | -2.20368 | 0.84392  |
| H  | -3.00327 | -1.46007 | 0.67781  |
| C  | -1.13636 | -2.96006 | -1.83402 |
| H  | -0.88281 | -2.75168 | -2.87432 |
| H  | -0.20136 | -3.09014 | -1.28743 |
| H  | -1.68899 | -3.90371 | -1.79853 |
| C  | -3.30638 | -1.73640 | -2.02221 |
| H  | -3.82350 | -2.70004 | -1.99798 |
| H  | -3.98328 | -0.99088 | -1.59825 |
| H  | -3.11564 | -1.48120 | -3.06606 |

**R = Ph**

|    |          |          |          |
|----|----------|----------|----------|
| P  | 0.78904  | -0.52126 | 0.40729  |
| C  | 0.22750  | 0.09277  | -1.02558 |
| P  | -1.49547 | 0.20393  | -1.37929 |
| C  | 2.59729  | -0.36650 | 0.28535  |
| C  | 3.37284  | -1.38676 | 0.83691  |
| C  | 3.23909  | 0.73299  | -0.28851 |
| C  | 4.75652  | -1.33540 | 0.76973  |
| C  | 4.62216  | 0.79226  | -0.34056 |
| C  | 5.38238  | -0.24713 | 0.17966  |
| H  | 5.34799  | -2.14445 | 1.18287  |
| H  | 5.11081  | 1.65397  | -0.78138 |
| C  | -2.36875 | -1.34947 | -1.07576 |
| C  | -1.97163 | -2.47181 | -1.80363 |
| C  | -3.39932 | -1.45644 | -0.14622 |
| C  | -2.60251 | -3.68552 | -1.59548 |
| C  | -4.02990 | -2.67609 | 0.05413  |
| C  | -3.63216 | -3.78938 | -0.66882 |
| H  | -2.28881 | -4.55457 | -2.16200 |
| H  | -4.83368 | -2.75319 | 0.77722  |
| Cl | 1.27534  | -1.91385 | -3.74520 |
| S  | -1.61754 | 0.74869  | -3.31148 |
| Pb | 1.14305  | 0.54662  | -3.18277 |
| H  | 2.64653  | 1.55976  | -0.66632 |
| H  | 6.46452  | -0.20177 | 0.13532  |
| H  | 2.88603  | -2.23512 | 1.30797  |
| H  | -4.12571 | -4.74171 | -0.51117 |
| H  | -1.16664 | -2.39445 | -2.52874 |
| H  | -3.72134 | -0.59535 | 0.42654  |
| C  | -2.26935 | 1.45261  | -0.32600 |

|   |          |         |          |
|---|----------|---------|----------|
| H | -1.73267 | 2.38781 | -0.48614 |
| H | -3.31358 | 1.58877 | -0.61176 |
| H | -2.19222 | 1.16790 | 0.72490  |

**R = Mes**

|    |          |          |          |
|----|----------|----------|----------|
| P  | 0.86270  | -0.67272 | 0.30732  |
| C  | 0.31898  | -0.22374 | -1.19100 |
| P  | -1.38536 | -0.10229 | -1.65174 |
| C  | 2.67216  | -0.39787 | 0.20295  |
| C  | 3.52273  | -1.48510 | -0.04291 |
| C  | 3.20975  | 0.87038  | 0.46972  |
| C  | 4.89663  | -1.27594 | -0.04970 |
| C  | 4.58967  | 1.03322  | 0.45299  |
| C  | 5.45063  | -0.02498 | 0.18767  |
| H  | 5.55223  | -2.11987 | -0.24466 |
| H  | 5.00431  | 2.01496  | 0.66448  |
| C  | -2.45603 | -1.46090 | -1.06922 |
| C  | -2.04595 | -2.76887 | -1.42345 |
| C  | -3.63559 | -1.29278 | -0.31145 |
| C  | -2.77285 | -3.85524 | -0.95373 |
| C  | -4.32019 | -2.42243 | 0.12322  |
| C  | -3.90259 | -3.71155 | -0.16566 |
| H  | -2.44004 | -4.85103 | -1.22928 |
| H  | -5.22418 | -2.28112 | 0.70742  |
| Cl | 2.14944  | -1.83145 | -3.92189 |
| S  | -1.37577 | 0.07878  | -3.66218 |
| Pb | 1.35442  | 0.46426  | -3.22989 |
| C  | -1.85554 | 1.51021  | -0.96759 |
| H  | -1.07166 | 2.18771  | -1.31063 |
| H  | -2.80817 | 1.85711  | -1.36125 |
| H  | -1.85607 | 1.49758  | 0.12195  |
| C  | 2.33142  | 2.04745  | 0.78214  |
| H  | 1.77190  | 2.37909  | -0.09734 |
| H  | 1.59081  | 1.80513  | 1.55071  |
| H  | 2.92525  | 2.88984  | 1.13976  |
| C  | 2.97509  | -2.85086 | -0.32515 |
| H  | 2.13456  | -3.09420 | 0.33318  |
| H  | 2.61319  | -2.91210 | -1.35629 |
| H  | 3.74193  | -3.61535 | -0.19105 |
| C  | 6.93416  | 0.18056  | 0.14391  |
| H  | 7.46912  | -0.70534 | 0.49145  |
| H  | 7.26813  | 0.38144  | -0.87897 |
| H  | 7.23797  | 1.02869  | 0.76015  |
| C  | -4.26380 | 0.02431  | 0.04969  |
| H  | -3.66005 | 0.60416  | 0.74881  |
| H  | -4.45245 | 0.64375  | -0.82796 |
| H  | -5.22564 | -0.15534 | 0.52962  |
| C  | -0.89350 | -3.06757 | -2.33155 |
| H  | -1.12793 | -2.78932 | -3.36146 |
| H  | 0.01614  | -2.52763 | -2.07216 |
| H  | -0.66531 | -4.13353 | -2.31030 |
| C  | -4.64122 | -4.90283 | 0.35815  |
| H  | -5.69342 | -4.67410 | 0.53561  |
| H  | -4.58217 | -5.74388 | -0.33493 |
| H  | -4.21190 | -5.23309 | 1.30933  |

**R = Mes\***

|    |          |          |          |
|----|----------|----------|----------|
| P  | 0.76078  | 1.19455  | 1.35349  |
| C  | 0.16098  | 0.47638  | -0.01505 |
| P  | -1.48978 | 0.29984  | -0.61429 |
| Cl | 1.83905  | -2.89642 | -0.26129 |
| C  | -3.10703 | 0.22796  | 0.29657  |
| C  | -3.68662 | -1.05472 | 0.51610  |
| C  | -3.97532 | 1.35187  | 0.29244  |
| C  | -5.04883 | -1.19597 | 0.29114  |

|   |          |          |          |
|---|----------|----------|----------|
| C | -5.33232 | 1.12969  | 0.06871  |
| C | -5.88257 | -0.13664 | -0.04072 |
| H | -5.47765 | -2.18508 | 0.39487  |
| H | -5.98209 | 1.99118  | -0.00301 |
| C | 2.58571  | 1.00069  | 1.10483  |
| C | 3.28400  | 0.03690  | 1.86984  |
| C | 3.26479  | 1.68482  | 0.06384  |
| C | 4.51132  | -0.41538 | 1.39043  |
| C | 4.48528  | 1.17029  | -0.36189 |
| C | 5.09727  | 0.07698  | 0.23621  |
| H | 5.01835  | -1.19761 | 1.93159  |
| H | 4.99142  | 1.65283  | -1.18714 |
| C | 2.79704  | -0.47681 | 3.23976  |
| C | 2.81350  | 3.02902  | -0.55410 |
| C | 6.38543  | -0.49439 | -0.34788 |
| C | -3.61065 | 2.79108  | 0.72011  |
| C | -2.99680 | -2.26058 | 1.18685  |
| C | -7.34229 | -0.38482 | -0.39988 |
| C | 4.04272  | 3.88181  | -0.90991 |
| H | 3.71016  | 4.88528  | -1.18676 |
| H | 4.72853  | 3.97143  | -0.06452 |
| H | 4.59863  | 3.48791  | -1.76221 |
| C | 2.00638  | 3.86972  | 0.43729  |
| H | 1.03379  | 3.43338  | 0.68215  |
| H | 2.55279  | 4.01272  | 1.37244  |
| H | 1.80580  | 4.85369  | 0.00428  |
| C | 2.00470  | 2.83895  | -1.84014 |
| H | 2.56538  | 2.24921  | -2.57052 |
| H | 1.05969  | 2.33562  | -1.63933 |
| H | 1.78544  | 3.81073  | -2.29336 |
| C | 7.47529  | 0.58352  | -0.36236 |
| H | 8.39969  | 0.17891  | -0.78424 |
| H | 7.18602  | 1.44765  | -0.96408 |
| H | 7.68912  | 0.93592  | 0.64982  |
| C | 6.90221  | -1.68907 | 0.44933  |
| H | 7.80569  | -2.07980 | -0.02531 |
| H | 7.16299  | -1.41326 | 1.47436  |
| H | 6.16870  | -2.49803 | 0.48489  |
| C | 6.11160  | -0.96109 | -1.78296 |
| H | 5.34500  | -1.73978 | -1.79775 |
| H | 5.77088  | -0.13888 | -2.41617 |
| H | 7.02302  | -1.37056 | -2.22788 |
| C | 3.85443  | -1.34217 | 3.93094  |
| H | 4.80552  | -0.81761 | 4.05070  |
| H | 3.49250  | -1.60182 | 4.92844  |
| H | 4.03403  | -2.27806 | 3.39678  |
| C | 2.54395  | 0.72770  | 4.15774  |
| H | 3.45090  | 1.32691  | 4.27267  |
| H | 1.75377  | 1.37836  | 3.77793  |
| H | 2.23709  | 0.38011  | 5.14841  |
| C | 1.53087  | -1.33015 | 3.14356  |
| H | 0.65863  | -0.74183 | 2.85308  |
| H | 1.64517  | -2.13370 | 2.41435  |
| H | 1.30889  | -1.76604 | 4.12253  |
| C | -2.17663 | 2.95659  | 1.20884  |
| H | -1.94056 | 2.23112  | 1.98951  |
| H | -1.42037 | 2.86356  | 0.43356  |
| H | -2.05757 | 3.95336  | 1.64132  |
| C | -4.48208 | 3.09120  | 1.95911  |
| H | -4.21963 | 4.07646  | 2.35439  |
| H | -5.54761 | 3.09600  | 1.72925  |
| H | -4.30876 | 2.35196  | 2.74435  |
| C | -3.94229 | 3.84249  | -0.34338 |
| H | -4.99615 | 3.80633  | -0.62634 |
| H | -3.74321 | 4.84183  | 0.05330  |
| H | -3.35447 | 3.72159  | -1.25300 |

|    |          |          |          |
|----|----------|----------|----------|
| C  | -1.54976 | -2.01440 | 1.59021  |
| H  | -1.22090 | -2.82479 | 2.24532  |
| H  | -0.86139 | -2.00216 | 0.74767  |
| H  | -1.45300 | -1.08059 | 2.14889  |
| C  | -3.08834 | -3.54594 | 0.36168  |
| H  | -2.52802 | -3.45639 | -0.56787 |
| H  | -2.66675 | -4.37516 | 0.93606  |
| H  | -4.12188 | -3.80427 | 0.12007  |
| C  | -3.76452 | -2.47709 | 2.50883  |
| H  | -3.73245 | -1.57988 | 3.13235  |
| H  | -4.81111 | -2.73896 | 2.34793  |
| H  | -3.29495 | -3.29355 | 3.06392  |
| C  | -8.08222 | 0.90660  | -0.73816 |
| H  | -8.13657 | 1.58314  | 0.11867  |
| H  | -7.60983 | 1.43811  | -1.56814 |
| H  | -9.10753 | 0.67278  | -1.03458 |
| C  | -8.05957 | -1.05781 | 0.77635  |
| H  | -7.60908 | -2.01918 | 1.03042  |
| H  | -8.02836 | -0.42590 | 1.66736  |
| H  | -9.10801 | -1.23824 | 0.52310  |
| C  | -7.39840 | -1.30790 | -1.62301 |
| H  | -6.90583 | -0.84789 | -2.48305 |
| H  | -6.90699 | -2.26335 | -1.42973 |
| H  | -8.43812 | -1.51219 | -1.89353 |
| Pb | 1.31043  | -0.85254 | -1.66332 |
| S  | -1.39969 | -1.33777 | -1.81281 |
| C  | -1.71781 | 1.63385  | -1.83583 |
| H  | -1.62606 | 2.63771  | -1.43276 |
| H  | -0.94884 | 1.47723  | -2.59245 |
| H  | -2.69326 | 1.49862  | -2.30417 |

## PCPX-E(II)-AuCl model systems

**E = Si(II)**

**[R-P=C(Si(II)Cl)-P(O)ClR](AuCl)**

**Coordination through Si(II) atom**

**R= H**

|    |          |          |          |
|----|----------|----------|----------|
| P  | 0.80407  | -0.10260 | 1.11290  |
| C  | 0.50080  | -0.30589 | -0.50484 |
| P  | -1.00073 | -0.32247 | -1.38538 |
| Cl | 1.69669  | -2.37389 | -2.52939 |
| Si | 1.37961  | -0.34670 | -2.24607 |
| O  | -0.37130 | -0.21508 | -2.78862 |
| H  | 2.22854  | -0.13774 | 1.02508  |
| H  | -1.79496 | -1.47465 | -1.26978 |
| Cl | -2.31334 | 1.12054  | -1.03045 |
| Au | 2.83535  | 1.22136  | -2.88237 |
| Cl | 4.31876  | 2.85901  | -3.47553 |

**R = Me**

|    |          |          |          |
|----|----------|----------|----------|
| P  | 0.82454  | -0.12224 | 1.05780  |
| C  | 0.48027  | -0.32854 | -0.55090 |
| P  | -1.03768 | -0.35138 | -1.39582 |
| Cl | 1.67504  | -2.33087 | -2.66395 |
| Si | 1.31439  | -0.31188 | -2.29766 |
| O  | -0.42140 | -0.18977 | -2.81182 |
| Cl | -2.29254 | 1.15329  | -1.00619 |
| Au | 2.79295  | 1.25840  | -2.89514 |
| Cl | 4.31676  | 2.89056  | -3.41386 |
| C  | 2.65008  | -0.15651 | 1.09402  |
| H  | 2.98031  | -1.20036 | 1.10023  |
| H  | 3.08082  | 0.33854  | 0.22003  |



|   |          |          |          |
|---|----------|----------|----------|
| H | 3.00592  | 0.31765  | 2.00948  |
| C | -2.03198 | -1.82570 | -1.28546 |
| H | -2.44352 | -1.92052 | -0.27969 |
| H | -2.84048 | -1.77008 | -2.01651 |
| H | -1.38154 | -2.67362 | -1.51048 |

**R = t-Bu**

|    |          |          |          |
|----|----------|----------|----------|
| P  | 0.76569  | -0.03962 | 0.84767  |
| C  | 0.55800  | -0.42678 | -0.75353 |
| P  | -0.98118 | -0.57348 | -1.57706 |
| Cl | 1.99969  | -2.56584 | -2.65315 |
| Si | 1.37098  | -0.58957 | -2.50912 |
| O  | -0.36383 | -0.74572 | -2.99486 |
| Au | 2.59243  | 1.07478  | -3.38614 |
| Cl | 3.83575  | 2.82682  | -4.19736 |
| C  | 2.58651  | 0.13779  | 1.17507  |
| C  | 3.49742  | -0.63361 | 0.23544  |
| C  | 2.84616  | 1.64711  | 1.06486  |
| C  | 2.79271  | -0.31895 | 2.62169  |
| H  | 3.26333  | -1.69980 | 0.21596  |
| H  | 3.44936  | -0.24727 | -0.78546 |
| H  | 4.53517  | -0.52266 | 0.56647  |
| H  | 2.17944  | 2.23007  | 1.70761  |
| H  | 3.87252  | 1.85321  | 1.38539  |
| H  | 2.73715  | 2.00096  | 0.03737  |
| H  | 3.82356  | -0.11195 | 2.92363  |
| H  | 2.12949  | 0.20610  | 3.31464  |
| H  | 2.62169  | -1.39272 | 2.73532  |
| C  | -2.13852 | -1.92498 | -1.17130 |
| C  | -3.23135 | -1.96088 | -2.24050 |
| C  | -1.32749 | -3.22338 | -1.19621 |
| C  | -2.72517 | -1.68413 | 0.21800  |
| H  | -3.84354 | -1.05801 | -2.23067 |
| H  | -2.81340 | -2.09088 | -3.24051 |
| H  | -3.88409 | -2.81323 | -2.03389 |
| H  | -0.53183 | -3.22440 | -0.44947 |
| H  | -2.00650 | -4.04959 | -0.96988 |
| H  | -0.87951 | -3.40750 | -2.17330 |
| H  | -3.36195 | -2.53461 | 0.47508  |
| H  | -1.94840 | -1.60798 | 0.98312  |
| H  | -3.33738 | -0.78195 | 0.25358  |
| Cl | -2.06603 | 1.11520  | -1.53047 |

**R = Ph**

|    |          |          |          |
|----|----------|----------|----------|
| P  | 0.93879  | -0.18396 | 0.70106  |
| C  | 0.53424  | -0.29240 | -0.91017 |
| P  | -1.09367 | -0.42231 | -1.52120 |
| Cl | 1.67461  | -2.40355 | -2.95525 |
| Si | 1.10730  | -0.41007 | -2.75416 |
| O  | -0.67633 | -0.53517 | -3.01338 |
| Au | 2.27660  | 1.18478  | -3.81122 |
| Cl | 3.50922  | 2.83124  | -4.83190 |
| C  | -2.12875 | -1.78760 | -1.03988 |
| C  | -1.95913 | -2.99210 | -1.72317 |
| C  | -3.02002 | -1.69629 | 0.02790  |
| C  | -2.69475 | -4.10017 | -1.33729 |
| H  | -1.26149 | -3.05659 | -2.54964 |
| C  | -3.74319 | -2.81323 | 0.40800  |
| H  | -3.15545 | -0.75820 | 0.55253  |
| C  | -3.58199 | -4.01163 | -0.27443 |
| H  | -2.57397 | -5.03504 | -1.87125 |
| H  | -4.43986 | -2.74633 | 1.23498  |
| H  | -4.15532 | -4.88200 | 0.02324  |
| C  | 2.72270  | -0.09233 | 0.81766  |
| C  | 3.22483  | -0.23745 | 2.11762  |
| C  | 3.61267  | 0.13968  | -0.23659 |

|    |          |          |          |
|----|----------|----------|----------|
| C  | 4.58744  | -0.18040 | 2.35470  |
| H  | 2.53659  | -0.39851 | 2.94179  |
| C  | 4.97041  | 0.21105  | 0.00656  |
| H  | 3.24704  | 0.29440  | -1.24624 |
| C  | 5.45859  | 0.04392  | 1.29863  |
| H  | 4.96919  | -0.30242 | 3.36144  |
| H  | 5.65172  | 0.40283  | -0.81391 |
| H  | 6.52586  | 0.09796  | 1.48133  |
| Cl | -2.19706 | 1.22262  | -1.22782 |

**R = Mes**

|    |          |          |          |
|----|----------|----------|----------|
| P  | 0.88492  | 0.52359  | 0.43753  |
| C  | 0.61208  | -0.55016 | -0.80048 |
| P  | -0.79120 | -0.94799 | -1.77807 |
| Cl | 1.92308  | -3.37468 | -1.45422 |
| Si | 1.67504  | -1.42166 | -2.15124 |
| O  | 0.05429  | -1.55069 | -2.93643 |
| Au | 3.34454  | -0.38296 | -3.22925 |
| Cl | 5.04133  | 0.78597  | -4.25397 |
| C  | -2.04278 | -2.06314 | -1.16229 |
| C  | -2.28611 | -3.31349 | -1.77471 |
| C  | -2.77131 | -1.66879 | -0.01971 |
| C  | -3.22732 | -4.14659 | -1.18259 |
| C  | -3.68892 | -2.55365 | 0.52352  |
| C  | -3.92562 | -3.80236 | -0.03410 |
| H  | -3.42049 | -5.10787 | -1.64751 |
| H  | -4.24182 | -2.24976 | 1.40662  |
| C  | 2.67832  | 0.41568  | 0.69298  |
| C  | 3.22976  | -0.62090 | 1.45892  |
| C  | 3.48476  | 1.44324  | 0.18306  |
| C  | 4.60191  | -0.62448 | 1.66885  |
| C  | 4.85173  | 1.39029  | 0.41274  |
| C  | 5.43088  | 0.36009  | 1.14303  |
| H  | 5.03675  | -1.42207 | 2.26396  |
| H  | 5.48176  | 2.17066  | -0.00290 |
| C  | 2.37727  | -1.70342 | 2.05168  |
| H  | 1.49064  | -1.29546 | 2.54862  |
| H  | 2.02793  | -2.40073 | 1.28539  |
| H  | 2.93813  | -2.27431 | 2.79268  |
| C  | 2.90238  | 2.55069  | -0.64020 |
| H  | 2.77278  | 2.23166  | -1.67942 |
| H  | 1.92115  | 2.86725  | -0.26633 |
| H  | 3.55573  | 3.42380  | -0.64466 |
| C  | 6.91407  | 0.30412  | 1.33826  |
| H  | 7.40048  | -0.09627 | 0.44359  |
| H  | 7.33016  | 1.29802  | 1.51475  |
| H  | 7.18339  | -0.33758 | 2.17852  |
| C  | -2.64196 | -0.31619 | 0.61043  |
| H  | -1.60639 | 0.01365  | 0.72179  |
| H  | -3.15825 | 0.44187  | 0.01549  |
| H  | -3.08788 | -0.31886 | 1.60509  |
| C  | -1.62192 | -3.81172 | -3.02472 |
| H  | -1.68705 | -3.09595 | -3.84402 |
| H  | -0.56201 | -4.01496 | -2.86430 |
| H  | -2.10139 | -4.73778 | -3.34126 |
| C  | -4.89526 | -4.75398 | 0.59095  |
| H  | -5.69616 | -4.22483 | 1.10965  |
| H  | -5.34028 | -5.41607 | -0.15320 |
| H  | -4.38754 | -5.38395 | 1.32809  |
| Cl | -1.75350 | 0.65949  | -2.51627 |

**R = Mes \***

|    |          |          |          |
|----|----------|----------|----------|
| P  | -0.57086 | 1.64882  | 1.52737  |
| C  | 0.08893  | 0.57309  | 0.43669  |
| P  | 1.68449  | -0.13496 | 0.19918  |
| Cl | -0.97120 | 0.54341  | -2.64108 |

|   |          |          |          |
|---|----------|----------|----------|
| O | 1.26660  | -0.83898 | -1.13079 |
| C | 3.39257  | 0.45935  | 0.07751  |
| C | 3.97455  | 0.54943  | -1.22286 |
| C | 4.24692  | 0.37500  | 1.20778  |
| C | 5.29586  | 0.14977  | -1.34774 |
| C | 5.56988  | 0.00853  | 0.99157  |
| C | 6.09389  | -0.21685 | -0.27091 |
| H | 5.73003  | 0.14764  | -2.33855 |
| H | 6.21285  | -0.09863 | 1.85380  |
| C | -2.33436 | 1.60591  | 1.04066  |
| C | -2.82573 | 2.57239  | 0.13455  |
| C | -3.17033 | 0.54577  | 1.47611  |
| C | -4.02593 | 2.29449  | -0.51602 |
| C | -4.34610 | 0.33129  | 0.77085  |
| C | -4.76218 | 1.14552  | -0.27500 |
| H | -4.38999 | 2.99531  | -1.25013 |
| H | -4.96062 | -0.51485 | 1.03980  |
| C | -2.16154 | 3.94772  | -0.08289 |
| C | -2.96273 | -0.21797 | 2.79883  |
| C | -6.00566 | 0.77434  | -1.07526 |
| C | 3.90846  | 0.83193  | 2.63900  |
| C | 3.33022  | 1.20328  | -2.46046 |
| C | 7.50388  | -0.74286 | -0.50364 |
| C | -3.92949 | -1.39668 | 2.94575  |
| H | -3.72673 | -1.90072 | 3.89349  |
| H | -4.97154 | -1.07200 | 2.97609  |
| H | -3.81059 | -2.13184 | 2.14573  |
| C | -3.26524 | 0.78532  | 3.92459  |
| H | -2.56717 | 1.62708  | 3.90915  |
| H | -4.27681 | 1.18641  | 3.82885  |
| H | -3.18236 | 0.29273  | 4.89782  |
| C | -1.55959 | -0.77598 | 3.02505  |
| H | -1.23147 | -1.41534 | 2.20407  |
| H | -0.80900 | 0.01148  | 3.17495  |
| H | -1.55589 | -1.36509 | 3.94629  |
| C | -7.21455 | 0.65888  | -0.13937 |
| H | -8.10672 | 0.39381  | -0.71331 |
| H | -7.07013 | -0.11235 | 0.61930  |
| H | -7.40755 | 1.60557  | 0.37213  |
| C | -6.33215 | 1.80680  | -2.15094 |
| H | -7.21481 | 1.48340  | -2.70775 |
| H | -6.55452 | 2.78839  | -1.72330 |
| H | -5.51408 | 1.91831  | -2.86697 |
| C | -5.75975 | -0.57687 | -1.75907 |
| H | -4.91496 | -0.51668 | -2.44930 |
| H | -5.53917 | -1.36807 | -1.04001 |
| H | -6.64511 | -0.87485 | -2.32795 |
| C | -3.01865 | 4.85827  | -0.96620 |
| H | -4.02306 | 4.99786  | -0.56096 |
| H | -2.54453 | 5.84099  | -1.02031 |
| H | -3.10430 | 4.48003  | -1.98752 |
| C | -2.02904 | 4.64693  | 1.27732  |
| H | -3.00515 | 4.75523  | 1.75567  |
| H | -1.37853 | 4.09951  | 1.96427  |
| H | -1.59891 | 5.64388  | 1.14528  |
| C | -0.78531 | 3.86814  | -0.74886 |
| H | -0.02792 | 3.42223  | -0.09926 |
| H | -0.81893 | 3.28248  | -1.66867 |
| H | -0.43768 | 4.87731  | -0.98872 |
| C | 2.48638  | 1.34405  | 2.81708  |
| H | 2.22591  | 2.08720  | 2.05926  |
| H | 1.74151  | 0.54900  | 2.81463  |
| H | 2.39883  | 1.83797  | 3.78757  |
| C | 4.82692  | 2.04147  | 2.91024  |
| H | 4.61251  | 2.44030  | 3.90526  |
| H | 5.88356  | 1.77488  | 2.87534  |

|    |          |          |          |
|----|----------|----------|----------|
| H  | 4.65420  | 2.83608  | 2.18039  |
| C  | 4.19581  | -0.24153 | 3.69208  |
| H  | 5.23452  | -0.57498 | 3.66448  |
| H  | 4.00979  | 0.16808  | 4.68832  |
| H  | 3.55677  | -1.11450 | 3.56127  |
| C  | 2.16849  | 2.11504  | -2.07327 |
| H  | 1.78618  | 2.61523  | -2.96593 |
| H  | 1.31764  | 1.59714  | -1.63930 |
| H  | 2.50041  | 2.88514  | -1.37176 |
| C  | 2.92294  | 0.18408  | -3.52880 |
| H  | 2.13704  | -0.48282 | -3.18607 |
| H  | 2.56474  | 0.71079  | -4.41721 |
| H  | 3.78265  | -0.42267 | -3.82481 |
| C  | 4.37450  | 2.14227  | -3.09809 |
| H  | 4.79901  | 2.83076  | -2.36374 |
| H  | 5.19231  | 1.60622  | -3.58075 |
| H  | 3.88053  | 2.73401  | -3.87252 |
| C  | 8.20649  | -1.10962 | 0.80075  |
| H  | 8.35962  | -0.23840 | 1.44281  |
| H  | 7.64849  | -1.86145 | 1.36437  |
| H  | 9.19132  | -1.52635 | 0.57821  |
| C  | 8.34028  | 0.32317  | -1.22188 |
| H  | 7.91712  | 0.58767  | -2.19280 |
| H  | 8.40997  | 1.23572  | -0.62478 |
| H  | 9.35370  | -0.05017 | -1.39135 |
| C  | 7.42086  | -1.99982 | -1.37846 |
| H  | 6.83767  | -2.78212 | -0.88706 |
| H  | 6.95566  | -1.79213 | -2.34401 |
| H  | 8.42426  | -2.39039 | -1.56721 |
| Au | -1.84543 | -2.37137 | -0.56216 |
| Cl | -3.29839 | -4.09862 | -0.06114 |
| Si | -0.51494 | -0.60301 | -0.96522 |
| Cl | 1.86216  | -1.68829 | 1.49720  |

#### Coordination through O atom

|             |          |          |          |
|-------------|----------|----------|----------|
| <b>R= H</b> |          |          |          |
| P           | 0.68754  | -0.15581 | 1.15403  |
| C           | 0.43909  | -0.31608 | -0.47915 |
| P           | -1.02055 | -0.12697 | -1.38122 |
| Cl          | 1.15080  | -2.49278 | -2.52264 |
| Si          | 1.50603  | -0.43793 | -2.15362 |
| O           | -0.36606 | 0.18671  | -2.74918 |
| H           | 2.09225  | -0.42595 | 1.14571  |
| H           | -1.80826 | -1.28441 | -1.45998 |
| Cl          | -2.33763 | 1.25860  | -0.83945 |
| Au          | -1.44027 | 0.28583  | -4.57949 |
| Cl          | -2.59636 | 0.38737  | -6.47005 |

|               |          |          |          |
|---------------|----------|----------|----------|
| <b>R = Me</b> |          |          |          |
| P             | 0.67263  | -0.18041 | 1.09828  |
| C             | 0.41603  | -0.30856 | -0.53571 |
| P             | -1.05964 | -0.15948 | -1.41429 |
| Cl            | 1.36178  | -2.39356 | -2.63029 |
| Si            | 1.46371  | -0.30744 | -2.21448 |
| O             | -0.39866 | 0.13043  | -2.79982 |
| Cl            | -2.28473 | 1.34444  | -0.91938 |
| Au            | -1.42885 | 0.21114  | -4.65056 |
| Cl            | -2.54662 | 0.28742  | -6.56721 |
| C             | 2.46628  | -0.51910 | 1.25565  |
| H             | 2.84036  | -0.09053 | 2.18641  |
| H             | 2.61619  | -1.60244 | 1.29637  |
| H             | 3.03223  | -0.12511 | 0.40805  |
| C             | -2.09106 | -1.60886 | -1.47780 |
| H             | -2.88214 | -1.45457 | -2.21446 |
| H             | -1.45545 | -2.44559 | -1.77608 |

H -2.52244 -1.78900 -0.49179

**R = t-Bu**

P 0.81298 -0.33896 0.88213  
C 0.43413 -0.19882 -0.73109  
P -1.19134 -0.29069 -1.35024  
Cl 1.77440 -1.56249 -3.20515  
Si 1.14071 0.34838 -2.50655  
O -0.82221 0.08063 -2.82118  
Au -2.01945 0.44993 -4.52668  
Cl -3.27989 0.82397 -6.31724  
C 2.66798 -0.26596 1.05175  
C 3.10524 -1.71694 1.28446  
C 3.40412 0.33110 -0.13358  
C 2.93005 0.55867 2.31553  
H 2.56858 -2.17928 2.11820  
H 2.95209 -2.32877 0.39264  
H 4.17237 -1.73609 1.52982  
H 3.05766 1.34051 -0.36653  
H 4.47437 0.39341 0.09114  
H 3.30491 -0.29082 -1.02704  
H 3.99819 0.53505 2.55161  
H 2.63981 1.60410 2.18330  
H 2.38782 0.16386 3.17897  
C -2.12379 -1.86110 -1.22351  
C -3.45857 -1.73407 -1.95818  
C -1.26005 -2.94611 -1.87096  
C -2.35208 -2.16486 0.25693  
H -4.10837 -0.98508 -1.50416  
H -3.32871 -1.48670 -3.01441  
H -3.96584 -2.70101 -1.90100  
H -0.29164 -3.05234 -1.37979  
H -1.79391 -3.89597 -1.78313  
H -1.08513 -2.75091 -2.92957  
H -2.86425 -3.12785 0.32916  
H -1.41523 -2.24314 0.81305  
H -2.98087 -1.41351 0.73749  
Cl -2.40998 1.13193 -0.61718

**R = Ph**

P 0.86686 -0.38279 1.11932  
C 0.41255 -0.35394 -0.48444  
P -1.20409 -0.29234 -1.07620  
Cl 1.35101 -1.67007 -3.18668  
Si 1.12206 0.22610 -2.23484  
O -0.84738 0.35558 -2.45783  
Au -2.21078 0.75282 -4.02709  
Cl -3.67947 1.16569 -5.64350  
C 2.66276 -0.42540 1.08917  
C 3.29756 -0.00964 2.26580  
C 3.44334 -0.83442 0.00220  
C 4.67877 0.03554 2.34062  
H 2.69790 0.29103 3.11953  
C 4.82390 -0.79492 0.08380  
H 2.97136 -1.22437 -0.89284  
C 5.44126 -0.35388 1.24787  
H 5.16209 0.37019 3.25098  
H 5.42208 -1.11548 -0.76109  
H 6.52335 -0.32530 1.30660  
C -2.06292 -1.84157 -1.24450  
C -3.39881 -1.86953 -1.64796  
C -1.36095 -3.02644 -1.03146  
C -4.02533 -3.08755 -1.83704  
H -3.94243 -0.94834 -1.82220  
C -2.00271 -4.24004 -1.21611  
H -0.31999 -2.99648 -0.73518

C -3.32941 -4.26960 -1.61824  
H -5.05927 -3.11362 -2.15889  
H -1.46126 -5.16368 -1.05096  
H -3.82671 -5.22136 -1.76591  
Cl -2.48109 0.93364 -0.13140

**R = Mes**

P 1.19827 -1.31270 1.37492  
C 0.27535 -0.73093 0.12291  
P -1.42967 -0.69968 -0.19785  
Cl 0.81560 -0.44804 -2.93785  
Si 0.61945 0.72509 -1.15946  
O -1.38680 0.61227 -1.04663  
Au -2.67739 2.30984 -1.09913  
Cl -4.00278 4.09258 -1.16585  
C 2.86378 -0.71464 0.93351  
C 3.36821 0.41582 1.59198  
C 3.66466 -1.43479 0.03475  
C 4.66621 0.82531 1.31809  
C 4.95789 -0.98918 -0.20354  
C 5.47519 0.14052 0.42007  
H 5.05576 1.70430 1.82323  
H 5.58307 -1.54687 -0.89470  
C -2.14641 -2.09699 -1.05313  
C -2.80313 -1.96542 -2.29831  
C -2.03288 -3.36020 -0.43380  
C -3.30212 -3.11838 -2.88934  
C -2.55834 -4.46914 -1.07985  
C -3.18777 -4.37507 -2.31158  
H -3.81194 -3.02146 -3.84231  
H -2.47568 -5.43687 -0.59533  
C 2.51696 1.19661 2.54699  
H 1.76729 1.78717 2.01087  
H 1.97635 0.54168 3.23948  
H 3.12014 1.88449 3.14057  
C 6.86186 0.61743 0.11587  
H 6.85555 1.29705 -0.74205  
H 7.29104 1.16038 0.95962  
H 7.52423 -0.21394 -0.13189  
C 3.15640 -2.66279 -0.66010  
H 2.69422 -3.36271 0.04408  
H 2.40179 -2.41009 -1.41023  
H 3.96911 -3.18751 -1.16365  
C -1.35846 -3.58642 0.88534  
H -0.27520 -3.67209 0.76095  
H -1.53912 -2.79239 1.61077  
H -1.71176 -4.51796 1.32855  
C -3.01688 -0.67596 -3.03117  
H -2.07212 -0.22576 -3.33813  
H -3.61209 -0.85988 -3.92509  
H -3.54715 0.06361 -2.42633  
C -3.71844 -5.58943 -3.00457  
H -2.98567 -5.96734 -3.72437  
H -3.93027 -6.39276 -2.29770  
H -4.63117 -5.36391 -3.55867  
Cl -2.61132 -0.32193 1.39631

**R = Mes\***

P 2.08237 1.96568 -0.28892  
C 1.08578 0.63266 -0.25310  
P -0.64875 0.48119 -0.37291  
C 3.73676 1.16585 -0.24052  
C 4.45456 1.15274 0.98779  
C 4.23307 0.44908 -1.34766  
C 5.48555 0.23842 1.12263  
C 5.26818 -0.46290 -1.12441

|   |          |          |          |                                                     |          |          |          |
|---|----------|----------|----------|-----------------------------------------------------|----------|----------|----------|
| C | 5.86974  | -0.63263 | 0.10579  | H                                                   | -3.90736 | 3.28505  | -2.89145 |
| H | 6.01383  | 0.18599  | 2.06318  | H                                                   | -2.48312 | 4.23225  | -3.31066 |
| H | 5.61416  | -1.05209 | -1.96208 | C                                                   | -6.39869 | 0.89993  | 0.41482  |
| C | 3.86194  | 0.66466  | -2.82982 | C                                                   | -7.03004 | 1.43745  | 1.70502  |
| C | 4.18665  | 2.14542  | 2.13533  | C                                                   | -6.62948 | -0.61397 | 0.32365  |
| C | 6.94535  | -1.68069 | 0.36869  | H                                                   | -6.87628 | 2.51541  | 1.80079  |
| C | 2.82492  | 1.92377  | 2.79835  | H                                                   | -8.10644 | 1.24657  | 1.69873  |
| H | 1.99066  | 2.16576  | 2.13497  | H                                                   | -6.61353 | 0.95657  | 2.59224  |
| H | 2.70100  | 0.88645  | 3.11420  | H                                                   | -6.17860 | -1.03510 | -0.57723 |
| H | 2.73121  | 2.57288  | 3.67399  | H                                                   | -6.20203 | -1.14437 | 1.17630  |
| C | 4.27763  | 3.57879  | 1.59389  | H                                                   | -7.70225 | -0.82367 | 0.30267  |
| H | 5.26083  | 3.76507  | 1.15521  | Cl                                                  | 1.88027  | -1.68525 | 1.74949  |
| H | 3.52396  | 3.78790  | 0.83158  | O                                                   | -0.66822 | -1.02546 | 0.06680  |
| H | 4.12530  | 4.29410  | 2.40701  | Au                                                  | -2.27872 | -2.34899 | -0.37539 |
| C | 5.23427  | 2.02994  | 3.24577  | Cl                                                  | -3.97989 | -3.71780 | -0.82591 |
| H | 5.18756  | 1.06682  | 3.75934  | C                                                   | -0.84076 | 3.51240  | -1.30073 |
| H | 6.24966  | 2.17826  | 2.87118  | H                                                   | -0.46707 | 3.49781  | -0.27384 |
| H | 5.04066  | 2.80499  | 3.99077  | H                                                   | -0.29826 | 2.77180  | -1.88665 |
| C | 3.37048  | -0.63259 | -3.47959 | H                                                   | -0.57893 | 4.48631  | -1.72139 |
| H | 2.46415  | -1.00204 | -2.99496 | C                                                   | -0.56512 | 0.78582  | 2.78602  |
| H | 3.14898  | -0.45656 | -4.53600 | H                                                   | 0.10449  | 0.27385  | 2.09819  |
| H | 4.11846  | -1.42551 | -3.42712 | H                                                   | -0.51638 | 1.86204  | 2.59988  |
| C | 2.82423  | 1.75150  | -3.09786 | H                                                   | -0.15858 | 0.60101  | 3.78325  |
| H | 1.81391  | 1.44941  | -2.82099 | C                                                   | -7.08510 | 1.56661  | -0.77426 |
| H | 3.07276  | 2.69384  | -2.59761 | H                                                   | -7.01881 | 2.65712  | -0.73034 |
| H | 2.80349  | 1.96429  | -4.17070 | H                                                   | -6.66288 | 1.23018  | -1.72432 |
| C | 5.14568  | 1.12709  | -3.54468 | H                                                   | -8.14563 | 1.30538  | -0.77301 |
| H | 5.51321  | 2.06425  | -3.11860 | Si                                                  | 1.30948  | -1.33955 | -0.27353 |
| H | 5.94712  | 0.39134  | -3.47486 | Cl                                                  | -1.04904 | 0.35312  | -2.36750 |
| H | 4.93589  | 1.29316  | -4.60490 |                                                     |          |          |          |
| C | 7.22288  | -2.54550 | -0.85782 | <b>Coordination through P (sp<sup>2</sup>) atom</b> |          |          |          |
| H | 7.60989  | -1.95697 | -1.69383 | <b>R = H</b>                                        |          |          |          |
| H | 7.97645  | -3.29687 | -0.61035 | P                                                   | 0.50562  | 0.13284  | 1.11549  |
| H | 6.32668  | -3.07395 | -1.19213 | C                                                   | 0.30871  | -0.25356 | -0.46491 |
| C | 6.47621  | -2.59651 | 1.50610  | P                                                   | -1.09919 | -0.29801 | -1.46341 |
| H | 6.30729  | -2.03958 | 2.42987  | Cl                                                  | 1.29170  | -2.62781 | -2.18597 |
| H | 5.54137  | -3.09768 | 1.24488  | Si                                                  | 1.36906  | -0.49748 | -2.16982 |
| H | 7.23141  | -3.36103 | 1.70875  | O                                                   | -0.40343 | -0.18808 | -2.82264 |
| C | 8.25173  | -0.99022 | 0.77733  | H                                                   | 1.88508  | -0.03306 | 1.36561  |
| H | 8.12919  | -0.39057 | 1.68154  | H                                                   | -1.81760 | -1.49504 | -1.32603 |
| H | 9.02503  | -1.73740 | 0.97625  | Cl                                                  | -2.51617 | 1.07677  | -1.21270 |
| H | 8.61156  | -0.33138 | -0.01699 | Au                                                  | -0.90029 | 0.77800  | 2.67214  |
| C | -2.10731 | 1.30370  | 0.29904  | Cl                                                  | -2.35271 | 1.43037  | 4.26430  |
| C | -2.72087 | 0.68486  | 1.42925  |                                                     |          |          |          |
| C | -2.88873 | 2.14927  | -0.53105 | <b>R = Me</b>                                       |          |          |          |
| C | -4.10294 | 0.59474  | 1.42135  | P                                                   | 0.54920  | 0.11872  | 1.06651  |
| C | -4.26926 | 2.02133  | -0.45504 | C                                                   | 0.33194  | -0.24855 | -0.51360 |
| C | -4.89963 | 1.16052  | 0.43274  | P                                                   | -1.09593 | -0.33666 | -1.48565 |
| H | -4.58006 | 0.06143  | 2.23346  | Cl                                                  | 1.45597  | -2.62511 | -2.15980 |
| H | -4.87322 | 2.62564  | -1.11773 | Si                                                  | 1.37370  | -0.48052 | -2.21334 |
| C | -2.00174 | 0.28133  | 2.72986  | O                                                   | -0.39480 | -0.30957 | -2.85565 |
| C | -2.04753 | -1.22211 | 3.00945  | Cl                                                  | -2.38232 | 1.19163  | -1.32325 |
| C | -2.73950 | 1.00298  | 3.87639  | Au                                                  | -0.96062 | 0.65608  | 2.57678  |
| H | -1.42808 | -1.78471 | 2.31257  | Cl                                                  | -2.52622 | 1.17073  | 4.12013  |
| H | -1.67443 | -1.41522 | 4.01886  | C                                                   | 2.29767  | -0.03737 | 1.49236  |
| H | -3.06640 | -1.61004 | 2.94737  | H                                                   | 2.44342  | -0.97657 | 2.03315  |
| H | -2.79159 | 2.08014  | 3.70032  | H                                                   | 2.91326  | -0.03850 | 0.59222  |
| H | -3.75413 | 0.63271  | 4.02465  | H                                                   | 2.58254  | 0.78172  | 2.15446  |
| H | -2.19067 | 0.83593  | 4.80661  | C                                                   | -2.07892 | -1.80154 | -1.24358 |
| C | -2.35422 | 3.33693  | -1.35312 | H                                                   | -2.84969 | -1.84470 | -2.01510 |
| C | -2.94332 | 4.59002  | -0.67144 | H                                                   | -1.40739 | -2.65822 | -1.33281 |
| C | -2.81959 | 3.31996  | -2.81108 | H                                                   | -2.53991 | -1.77564 | -0.25491 |
| H | -2.63858 | 4.64607  | 0.37635  |                                                     |          |          |          |
| H | -2.57590 | 5.48438  | -1.18187 |                                                     |          |          |          |
| H | -4.03297 | 4.60423  | -0.70742 |                                                     |          |          |          |
| H | -2.41434 | 2.46747  | -3.35518 |                                                     |          |          |          |

**R = t-Bu**

|    |          |          |          |
|----|----------|----------|----------|
| P  | 0.80873  | 0.10291  | 0.86099  |
| C  | 0.50413  | -0.41203 | -0.67193 |
| P  | -1.02254 | -0.60216 | -1.48595 |
| Cl | 1.93274  | -2.65788 | -2.41991 |
| Si | 1.36609  | -0.59616 | -2.47454 |
| O  | -0.44872 | -0.79014 | -2.90736 |
| Au | -0.67063 | 0.79048  | 2.35410  |
| Cl | -2.20687 | 1.47791  | 3.86775  |
| C  | 2.61823  | 0.05224  | 1.24977  |
| C  | 2.81121  | 0.61142  | 2.65685  |
| C  | 3.08321  | -1.40429 | 1.18748  |
| C  | 3.36994  | 0.90828  | 0.23190  |
| H  | 2.47490  | 1.64771  | 2.73526  |
| H  | 2.27490  | 0.02516  | 3.40651  |
| H  | 3.87586  | 0.58256  | 2.90501  |
| H  | 2.95043  | -1.83435 | 0.19370  |
| H  | 4.14782  | -1.44300 | 1.43886  |
| H  | 2.54944  | -2.02942 | 1.90788  |
| H  | 4.43942  | 0.86820  | 0.46004  |
| H  | 3.23682  | 0.55334  | -0.79309 |
| H  | 3.05725  | 1.95421  | 0.27311  |
| C  | -2.13248 | -1.97826 | -1.01521 |
| C  | -1.29265 | -3.25707 | -1.00435 |
| C  | -2.74058 | -1.72514 | 0.36061  |
| C  | -3.21896 | -2.06975 | -2.08968 |
| H  | -0.84181 | -3.46130 | -1.97569 |
| H  | -0.49454 | -3.21715 | -0.26136 |
| H  | -1.95300 | -4.09012 | -0.74894 |
| H  | -3.35015 | -0.82117 | 0.38733  |
| H  | -3.38397 | -2.57292 | 0.61088  |
| H  | -1.97918 | -1.64981 | 1.13991  |
| H  | -3.84361 | -2.93863 | -1.86595 |
| H  | -3.86109 | -1.18784 | -2.09886 |
| H  | -2.79288 | -2.20655 | -3.08521 |
| Cl | -2.16281 | 1.05753  | -1.43919 |

#### R= Ph

|    |          |          |          |
|----|----------|----------|----------|
| P  | 0.81466  | -0.13222 | 1.00890  |
| C  | 0.42910  | -0.20230 | -0.58750 |
| P  | -1.14443 | -0.25436 | -1.31192 |
| Cl | 1.64467  | -1.88714 | -2.96444 |
| Si | 1.15416  | 0.12923  | -2.41377 |
| O  | -0.69823 | 0.04669  | -2.75464 |
| Au | -0.58989 | 0.01867  | 2.70897  |
| Cl | -2.08320 | 0.11480  | 4.40598  |
| C  | -2.03668 | -1.78921 | -1.18994 |
| C  | -2.77942 | -2.09811 | -0.05049 |
| C  | -1.92638 | -2.70004 | -2.23871 |
| C  | -3.41335 | -3.32455 | 0.03376  |
| H  | -2.86750 | -1.38761 | 0.76401  |
| C  | -2.57276 | -3.92214 | -2.14402 |
| H  | -1.33928 | -2.45157 | -3.11402 |
| C  | -3.31128 | -4.23326 | -1.01218 |
| H  | -3.99120 | -3.56937 | 0.91678  |
| H  | -2.49596 | -4.63280 | -2.95820 |
| H  | -3.81346 | -5.19143 | -0.94276 |
| C  | 2.57107  | -0.20116 | 1.26780  |
| C  | 3.46115  | -0.60349 | 0.26713  |
| C  | 3.05631  | 0.17424  | 2.52414  |
| C  | 4.82028  | -0.60712 | 0.52216  |
| H  | 3.09037  | -0.94394 | -0.69243 |
| C  | 4.41782  | 0.16934  | 2.76844  |
| H  | 2.36114  | 0.47396  | 3.30171  |
| C  | 5.29848  | -0.21761 | 1.76728  |
| H  | 5.50966  | -0.92299 | -0.25173 |
| H  | 4.79262  | 0.46557  | 3.74085  |

|    |          |          |          |
|----|----------|----------|----------|
| H  | 6.36507  | -0.22484 | 1.96083  |
| Cl | -2.40972 | 1.15699  | -0.65158 |

#### R = Mes

|    |          |          |          |
|----|----------|----------|----------|
| P  | 0.79940  | -0.30541 | 1.63752  |
| C  | 0.27375  | -0.40067 | 0.08643  |
| P  | -1.24804 | -0.32366 | -0.75250 |
| Cl | 1.44551  | -1.66115 | -2.54563 |
| Si | 1.13880  | 0.25001  | -1.59870 |
| O  | -0.69603 | 0.43729  | -1.97561 |
| Au | -0.32417 | -0.23514 | 3.53876  |
| Cl | -1.45433 | -0.16398 | 5.49812  |
| C  | -2.06760 | -1.85648 | -1.17698 |
| C  | -2.34889 | -2.78531 | -0.15535 |
| C  | -2.44506 | -2.12257 | -2.51245 |
| C  | -2.96403 | -3.98155 | -0.49135 |
| C  | -3.05807 | -3.33984 | -2.77938 |
| C  | -3.31544 | -4.28657 | -1.79800 |
| H  | -3.18196 | -4.69137 | 0.30029  |
| H  | -3.35486 | -3.54771 | -3.80236 |
| C  | 2.59472  | -0.21280 | 1.62795  |
| C  | 3.35474  | -1.37097 | 1.40490  |
| C  | 3.20911  | 1.02207  | 1.88764  |
| C  | 4.73796  | -1.26248 | 1.44496  |
| C  | 4.59492  | 1.07536  | 1.91056  |
| C  | 5.37635  | -0.05378 | 1.69573  |
| H  | 5.33513  | -2.15315 | 1.27522  |
| H  | 5.07763  | 2.02947  | 2.09861  |
| C  | -2.01145 | -2.55232 | 1.28433  |
| H  | -0.95391 | -2.75051 | 1.47727  |
| H  | -2.21922 | -1.53256 | 1.61359  |
| H  | -2.59073 | -3.22024 | 1.92194  |
| C  | -2.25093 | -1.18683 | -3.66932 |
| H  | -2.62371 | -0.18326 | -3.46385 |
| H  | -1.19485 | -1.08766 | -3.92490 |
| H  | -2.77972 | -1.57614 | -4.53941 |
| C  | -3.94622 | -5.59860 | -2.14135 |
| H  | -4.61261 | -5.50806 | -3.00060 |
| H  | -3.17767 | -6.33394 | -2.39948 |
| H  | -4.51452 | -6.00039 | -1.30110 |
| C  | 6.86998  | 0.02449  | 1.76118  |
| H  | 7.21947  | -0.14598 | 2.78434  |
| H  | 7.33644  | -0.73016 | 1.12594  |
| H  | 7.23092  | 1.00683  | 1.45216  |
| C  | 2.71749  | -2.69925 | 1.12845  |
| H  | 1.93150  | -2.92864 | 1.85505  |
| H  | 2.26315  | -2.72105 | 0.13392  |
| H  | 3.45760  | -3.49830 | 1.17881  |
| C  | 2.40240  | 2.26656  | 2.09919  |
| H  | 1.85823  | 2.54126  | 1.19021  |
| H  | 1.66432  | 2.13993  | 2.89796  |
| H  | 3.04403  | 3.10547  | 2.36927  |
| Cl | -2.64437 | 0.83837  | 0.13426  |

#### R = Mes\*

|    |          |          |          |
|----|----------|----------|----------|
| P  | -1.22485 | 0.73325  | 0.01613  |
| C  | -0.26043 | -0.53321 | 0.42510  |
| P  | 1.42508  | -0.92817 | 0.70319  |
| Cl | -1.24208 | -3.26331 | -0.99783 |
| O  | 1.21304  | -2.45381 | 0.60882  |
| C  | 3.05570  | -0.52420 | 0.02176  |
| C  | 3.60028  | -1.48158 | -0.88375 |
| C  | 3.93524  | 0.35768  | 0.70237  |
| C  | 4.94939  | -1.77292 | -0.75839 |
| C  | 5.27893  | 0.00566  | 0.75870  |
| C  | 5.79606  | -1.11171 | 0.12285  |

|    |          |          |          |
|----|----------|----------|----------|
| H  | 5.36037  | -2.54615 | -1.39437 |
| H  | 5.94549  | 0.64799  | 1.31682  |
| C  | -2.92430 | 0.09930  | 0.11216  |
| C  | -3.59323 | -0.33082 | -1.06593 |
| C  | -3.47345 | -0.17927 | 1.38784  |
| C  | -4.66563 | -1.20044 | -0.91056 |
| C  | -4.53952 | -1.07089 | 1.44513  |
| C  | -5.11861 | -1.63907 | 0.32508  |
| H  | -5.15786 | -1.57018 | -1.79433 |
| H  | -4.93319 | -1.32945 | 2.41954  |
| C  | -3.27500 | 0.17546  | -2.48719 |
| C  | -3.10698 | 0.47461  | 2.73840  |
| C  | -6.22669 | -2.67528 | 0.47873  |
| C  | 3.59155  | 1.76879  | 1.21204  |
| C  | 2.86963  | -2.10252 | -2.08805 |
| C  | 7.24203  | -1.56304 | 0.28208  |
| C  | -4.38371 | 1.14834  | 3.27603  |
| H  | -4.16595 | 1.62732  | 4.23427  |
| H  | -4.73936 | 1.91681  | 2.58515  |
| H  | -5.19675 | 0.44059  | 3.43717  |
| C  | -2.05783 | 1.58140  | 2.68470  |
| H  | -1.04874 | 1.20679  | 2.50649  |
| H  | -2.29805 | 2.34853  | 1.94331  |
| H  | -2.02865 | 2.08276  | 3.65617  |
| C  | -2.63410 | -0.58196 | 3.74226  |
| H  | -3.39312 | -1.34582 | 3.91970  |
| H  | -1.73463 | -1.09018 | 3.38854  |
| H  | -2.40991 | -0.10604 | 4.70105  |
| C  | -7.40584 | -2.06290 | 1.24336  |
| H  | -8.20124 | -2.80388 | 1.36137  |
| H  | -7.11464 | -1.72781 | 2.24086  |
| H  | -7.81758 | -1.20431 | 0.70708  |
| C  | -6.73921 | -3.18166 | -0.86696 |
| H  | -7.51289 | -3.93482 | -0.70009 |
| H  | -7.18454 | -2.38070 | -1.46282 |
| H  | -5.94455 | -3.64876 | -1.45375 |
| C  | -5.67432 | -3.87135 | 1.26406  |
| H  | -4.82743 | -4.32337 | 0.74268  |
| H  | -5.33436 | -3.57938 | 2.25973  |
| H  | -6.45057 | -4.63218 | 1.38436  |
| C  | -4.15748 | -0.49205 | -3.54713 |
| H  | -5.22015 | -0.29884 | -3.38627 |
| H  | -3.89841 | -0.07627 | -4.52311 |
| H  | -3.99815 | -1.57204 | -3.59510 |
| C  | -3.58286 | 1.67808  | -2.53888 |
| H  | -4.63276 | 1.86482  | -2.30041 |
| H  | -2.97414 | 2.25216  | -1.83674 |
| H  | -3.38424 | 2.06832  | -3.54069 |
| C  | -1.83139 | -0.08578 | -2.92459 |
| H  | -1.09802 | 0.51387  | -2.38023 |
| H  | -1.56472 | -1.13684 | -2.80837 |
| H  | -1.71852 | 0.19223  | -3.97622 |
| C  | 2.14346  | 2.17816  | 0.98428  |
| H  | 1.84182  | 1.98443  | -0.04832 |
| H  | 1.44094  | 1.69372  | 1.66039  |
| H  | 2.03860  | 3.25341  | 1.14284  |
| C  | 4.43122  | 2.72934  | 0.34257  |
| H  | 4.19816  | 3.76021  | 0.62044  |
| H  | 5.50301  | 2.57710  | 0.47368  |
| H  | 4.19643  | 2.60525  | -0.71704 |
| C  | 3.97227  | 1.99090  | 2.67769  |
| H  | 5.03142  | 1.79726  | 2.85796  |
| H  | 3.77894  | 3.03236  | 2.94716  |
| H  | 3.39360  | 1.35555  | 3.34743  |
| C  | 1.54421  | -1.41233 | -2.39537 |
| H  | 1.16324  | -1.78004 | -3.35118 |
| H  | 0.76229  | -1.62507 | -1.67059 |
| H  | 1.67213  | -0.32998 | -2.48360 |
| C  | 2.67189  | -3.61277 | -1.93435 |
| H  | 2.01585  | -3.84829 | -1.09925 |
| H  | 2.22647  | -4.01867 | -2.84644 |
| H  | 3.62842  | -4.11754 | -1.77684 |
| C  | 3.75289  | -1.85600 | -3.32796 |
| H  | 3.97390  | -0.79341 | -3.45419 |
| H  | 4.69773  | -2.39887 | -3.29313 |
| H  | 3.21419  | -2.19819 | -4.21502 |
| C  | 8.00195  | -0.72137 | 1.30368  |
| H  | 8.08994  | 0.32203  | 0.99043  |
| H  | 7.52486  | -0.74836 | 2.28652  |
| H  | 9.01513  | -1.11391 | 1.41633  |
| C  | 7.96671  | -1.45988 | -1.06543 |
| H  | 7.50254  | -2.08922 | -1.82715 |
| H  | 7.96690  | -0.43092 | -1.43312 |
| H  | 9.00566  | -1.78215 | -0.95569 |
| C  | 7.25166  | -3.02206 | 0.75465  |
| H  | 6.75054  | -3.12462 | 1.72008  |
| H  | 6.74816  | -3.68120 | 0.04478  |
| H  | 8.28127  | -3.37248 | 0.86575  |
| Au | -0.71677 | 2.81365  | -0.57849 |
| Cl | -0.21178 | 4.95191  | -1.15149 |
| Si | -0.65744 | -2.46756 | 0.90978  |
| Cl | 1.67207  | -0.61904 | 2.70834  |

  

| Coordination through $\pi(\text{C}=\text{P})$ bond |          |          |          |
|----------------------------------------------------|----------|----------|----------|
| R = H                                              |          |          |          |
| P                                                  | 0.69472  | 0.17989  | 1.10190  |
| C                                                  | 0.33114  | 0.00754  | -0.57998 |
| P                                                  | -1.16640 | -0.34682 | -1.38664 |
| Cl                                                 | 1.24536  | -2.59254 | -2.00106 |
| Si                                                 | 1.19657  | -0.48193 | -2.35779 |
| O                                                  | -0.64833 | -0.35774 | -2.82862 |
| H                                                  | 2.09460  | -0.08498 | 1.00090  |
| H                                                  | -1.67450 | -1.59472 | -0.99565 |
| Cl                                                 | -2.75954 | 0.83730  | -1.17799 |
| Au                                                 | 0.71809  | 2.10029  | -0.29106 |
| Cl                                                 | 1.06215  | 4.30588  | -0.51413 |

  

| R = Me |          |          |          |
|--------|----------|----------|----------|
| P      | 0.71426  | 0.20744  | 0.99808  |
| C      | 0.32776  | 0.02436  | -0.67444 |
| P      | -1.17263 | -0.42007 | -1.44272 |
| Cl     | 1.50355  | -2.55792 | -1.97888 |
| Si     | 1.19939  | -0.47209 | -2.43381 |
| O      | -0.63116 | -0.55768 | -2.87746 |
| Cl     | -2.68862 | 0.89829  | -1.40704 |
| Au     | 0.61786  | 2.13712  | -0.39252 |
| Cl     | 0.88043  | 4.36420  | -0.55661 |
| C      | 2.50831  | -0.16477 | 1.05017  |
| H      | 2.96691  | 0.40145  | 1.86285  |
| H      | 2.60661  | -1.23074 | 1.28108  |
| H      | 3.02399  | 0.03857  | 0.11190  |
| C      | -1.87753 | -1.93861 | -0.83012 |
| H      | -2.24642 | -1.79010 | 0.18583  |
| H      | -2.69723 | -2.23736 | -1.48564 |
| H      | -1.08865 | -2.69353 | -0.84841 |

  

| R = <i>t</i> -Bu |          |          |          |
|------------------|----------|----------|----------|
| P                | 0.64331  | 0.17443  | 0.96019  |
| C                | 0.35142  | 0.11982  | -0.74698 |
| P                | -1.15511 | -0.34988 | -1.52999 |
| Cl               | 2.02724  | -1.93812 | -2.56224 |

|    |          |          |          |
|----|----------|----------|----------|
| Si | 1.18140  | 0.03639  | -2.59356 |
| O  | -0.60172 | -0.44604 | -2.96499 |
| Au | 0.41969  | 2.21959  | -0.22544 |
| Cl | 0.51006  | 4.46610  | -0.08256 |
| C  | 2.47825  | -0.02039 | 1.24597  |
| C  | 2.67352  | -1.53350 | 1.40299  |
| C  | 3.39248  | 0.52626  | 0.16312  |
| C  | 2.75273  | 0.68162  | 2.57767  |
| H  | 2.00073  | -1.96003 | 2.15371  |
| H  | 2.52162  | -2.05597 | 0.45604  |
| H  | 3.69797  | -1.72759 | 1.73670  |
| H  | 3.26258  | 1.60186  | 0.02549  |
| H  | 4.43494  | 0.35096  | 0.45008  |
| H  | 3.23867  | 0.02922  | -0.79644 |
| H  | 3.78809  | 0.49638  | 2.87865  |
| H  | 2.61420  | 1.76267  | 2.49817  |
| H  | 2.10172  | 0.31305  | 3.37529  |
| C  | -1.98747 | -1.89021 | -0.99219 |
| C  | -3.03809 | -2.23579 | -2.04991 |
| C  | -0.93347 | -2.99626 | -0.92193 |
| C  | -2.63114 | -1.67871 | 0.37641  |
| H  | -3.82274 | -1.48020 | -2.11093 |
| H  | -2.58993 | -2.35717 | -3.03760 |
| H  | -3.50446 | -3.18411 | -1.76954 |
| H  | -0.17210 | -2.79155 | -0.16756 |
| H  | -1.43943 | -3.92538 | -0.64587 |
| H  | -0.43155 | -3.14907 | -1.87739 |
| H  | -3.06409 | -2.62858 | 0.70150  |
| H  | -1.90192 | -1.37156 | 1.13020  |
| H  | -3.43009 | -0.93721 | 0.34386  |
| Cl | -2.60452 | 1.05661  | -1.49595 |

#### R = Ph

|    |          |          |          |
|----|----------|----------|----------|
| P  | 0.70624  | 0.17366  | 1.09576  |
| C  | 0.22841  | 0.18574  | -0.56754 |
| P  | -1.37738 | -0.08097 | -1.19255 |
| Cl | 1.23581  | -1.68238 | -3.02672 |
| Si | 0.78478  | 0.35331  | -2.50956 |
| O  | -1.08439 | 0.23993  | -2.67051 |
| Au | 0.57242  | 2.26222  | -0.06606 |
| Cl | 0.89611  | 4.48694  | 0.08177  |
| C  | 2.48346  | -0.14403 | 1.11432  |
| C  | 3.13237  | 0.15556  | 2.31650  |
| C  | 3.21352  | -0.69432 | 0.05919  |
| C  | 4.49310  | -0.05956 | 2.44928  |
| H  | 2.56634  | 0.57107  | 3.14461  |
| C  | 4.57195  | -0.91839 | 0.20157  |
| H  | 2.71685  | -0.97188 | -0.86255 |
| C  | 5.21324  | -0.59556 | 1.39064  |
| H  | 4.99203  | 0.18770  | 3.37896  |
| H  | 5.13311  | -1.34828 | -0.61996 |
| H  | 6.27817  | -0.76967 | 1.49460  |
| C  | -1.99556 | -1.73854 | -0.97898 |
| C  | -2.10217 | -2.56964 | -2.09000 |
| C  | -2.35225 | -2.19449 | 0.28944  |
| C  | -2.57366 | -3.86309 | -1.92589 |
| H  | -1.81096 | -2.20629 | -3.06724 |
| C  | -2.81521 | -3.48852 | 0.44180  |
| H  | -2.27092 | -1.54237 | 1.15259  |
| C  | -2.92699 | -4.32040 | -0.66590 |
| H  | -2.65964 | -4.51505 | -2.78689 |
| H  | -3.09211 | -3.84966 | 1.42502  |
| H  | -3.29234 | -5.33350 | -0.54270 |
| Cl | -2.84047 | 1.11256  | -0.49672 |

#### R = Mes

|    |          |          |          |
|----|----------|----------|----------|
| P  | 0.70795  | 0.14859  | 1.51674  |
| C  | 0.10204  | 0.17174  | -0.11185 |
| P  | -1.48872 | -0.08167 | -0.80565 |
| Cl | 1.27374  | -0.92560 | -3.01509 |
| Si | 0.63613  | 0.82495  | -1.95385 |
| O  | -1.19236 | 0.60767  | -2.15715 |
| Au | 0.28214  | 2.26425  | 0.45187  |
| Cl | 0.43409  | 4.49138  | 0.82501  |
| C  | 2.50847  | -0.07254 | 1.35050  |
| C  | 3.37540  | 0.83875  | 1.97893  |
| C  | 3.02402  | -1.24410 | 0.76091  |
| C  | 4.74560  | 0.61687  | 1.90865  |
| C  | 4.39919  | -1.42022 | 0.72617  |
| C  | 5.28026  | -0.49079 | 1.26797  |
| H  | 5.41241  | 1.33178  | 2.38148  |
| H  | 4.79507  | -2.32522 | 0.27485  |
| C  | -2.02474 | -1.78324 | -0.97683 |
| C  | -2.35525 | -2.31650 | -2.24490 |
| C  | -2.13051 | -2.58018 | 0.18052  |
| C  | -2.70870 | -3.65755 | -2.30897 |
| C  | -2.49304 | -3.91272 | 0.04410  |
| C  | -2.76553 | -4.47886 | -1.19115 |
| H  | -2.96503 | -4.07083 | -3.27918 |
| H  | -2.57638 | -4.52020 | 0.93997  |
| C  | 2.87902  | 2.04205  | 2.72126  |
| H  | 2.67217  | 2.88113  | 2.05028  |
| H  | 1.95090  | 1.83850  | 3.26320  |
| H  | 3.62389  | 2.37407  | 3.44605  |
| C  | 2.14458  | -2.34135 | 0.23760  |
| H  | 1.36392  | -2.60654 | 0.95720  |
| H  | 1.65144  | -2.06646 | -0.69557 |
| H  | 2.73541  | -3.23874 | 0.05012  |
| C  | 6.76076  | -0.68782 | 1.16870  |
| H  | 7.28858  | -0.15522 | 1.96140  |
| H  | 7.02753  | -1.74498 | 1.22537  |
| H  | 7.13493  | -0.30888 | 0.21239  |
| C  | -1.88590 | -2.07729 | 1.57155  |
| H  | -0.84555 | -2.22878 | 1.87162  |
| H  | -2.10863 | -1.01881 | 1.70152  |
| H  | -2.50850 | -2.62950 | 2.27718  |
| C  | -2.38890 | -1.54121 | -3.52958 |
| H  | -2.96195 | -0.61810 | -3.44238 |
| H  | -1.38638 | -1.26426 | -3.85766 |
| H  | -2.84616 | -2.15480 | -4.30590 |
| C  | -3.11568 | -5.92731 | -1.31973 |
| H  | -3.84840 | -6.09091 | -2.11190 |
| H  | -2.22630 | -6.51253 | -1.57347 |
| H  | -3.51717 | -6.32626 | -0.38719 |
| Cl | -3.04979 | 0.90887  | 0.02587  |

#### R = Mes\*

|    |          |          |          |
|----|----------|----------|----------|
| P  | 0.68548  | 0.31836  | 1.04893  |
| C  | 0.40885  | 0.05722  | -0.66620 |
| P  | -1.11961 | -0.16336 | -1.59247 |
| O  | -0.42902 | -0.00202 | -2.97679 |
| Cl | 2.51777  | -0.83105 | -3.21163 |
| Au | 0.65550  | 2.23171  | -0.51523 |
| Cl | 0.73431  | 4.50259  | -0.26653 |
| C  | 2.51059  | 0.09287  | 1.21706  |
| C  | 3.16106  | -1.08485 | 0.75290  |
| C  | 3.31518  | 1.17272  | 1.66464  |
| C  | 4.49825  | -0.99465 | 0.39932  |
| C  | 4.65306  | 1.19017  | 1.26659  |
| C  | 5.24810  | 0.16509  | 0.55477  |
| H  | 4.98601  | -1.87733 | 0.00605  |
| H  | 5.24989  | 2.04719  | 1.54327  |

|   |          |          |          |
|---|----------|----------|----------|
| C | 2.94124  | 2.25286  | 2.70395  |
| C | 2.60539  | -2.52048 | 0.86097  |
| C | 6.67635  | 0.23418  | 0.02761  |
| C | 3.78157  | 1.91431  | 3.95227  |
| H | 3.53382  | 0.92031  | 4.33425  |
| H | 4.85197  | 1.93633  | 3.74305  |
| H | 3.57448  | 2.64448  | 4.73962  |
| C | 3.30750  | 3.66468  | 2.23580  |
| H | 2.75247  | 3.94869  | 1.34156  |
| H | 3.05674  | 4.38086  | 3.02328  |
| H | 4.37382  | 3.77187  | 2.03078  |
| C | 1.48908  | 2.27402  | 3.17222  |
| H | 1.41212  | 2.95914  | 4.02121  |
| H | 0.80260  | 2.63889  | 2.40827  |
| H | 1.15208  | 1.29365  | 3.51881  |
| C | 2.90172  | -3.35583 | -0.38806 |
| H | 2.50663  | -2.88171 | -1.28544 |
| H | 3.97110  | -3.51354 | -0.53583 |
| H | 2.44418  | -4.34390 | -0.28574 |
| C | 3.34654  | -3.15116 | 2.05669  |
| H | 4.42707  | -3.14661 | 1.90621  |
| H | 3.13438  | -2.60572 | 2.97979  |
| H | 3.02302  | -4.18798 | 2.18905  |
| C | 1.11848  | -2.64928 | 1.17336  |
| H | 0.82419  | -2.05275 | 2.04300  |
| H | 0.48850  | -2.37522 | 0.32962  |
| H | 0.90197  | -3.69309 | 1.41870  |
| C | 7.32847  | 1.58683  | 0.30054  |
| H | 6.76135  | 2.40673  | -0.14674 |
| H | 7.43130  | 1.78249  | 1.37109  |
| H | 8.33152  | 1.60180  | -0.13264 |
| C | 6.64976  | 0.00840  | -1.48898 |
| H | 7.66564  | 0.04242  | -1.89284 |
| H | 6.21689  | -0.96070 | -1.74517 |
| H | 6.05678  | 0.77791  | -1.98858 |
| C | 7.53064  | -0.85422 | 0.68804  |
| H | 7.55989  | -0.72472 | 1.77286  |
| H | 7.14824  | -1.85528 | 0.47852  |
| H | 8.55636  | -0.80602 | 0.31171  |
| C | -2.36730 | -1.49681 | -1.68738 |
| C | -2.35683 | -2.33340 | -2.84649 |
| C | -3.57812 | -1.36894 | -0.95377 |
| C | -3.58403 | -2.65362 | -3.40646 |
| C | -1.13646 | -3.05294 | -3.45154 |
| C | -4.75932 | -1.76671 | -1.56912 |
| C | -3.71976 | -0.98136 | 0.52843  |
| C | -4.80450 | -2.31329 | -2.83979 |
| H | -3.58132 | -3.22524 | -4.32471 |
| C | -0.69866 | -2.45906 | -4.79395 |
| C | -1.52579 | -4.52316 | -3.71218 |
| C | 0.01382  | -3.12991 | -2.45598 |
| H | -5.68168 | -1.63401 | -1.02214 |
| C | -2.41473 | -0.59617 | 1.20092  |
| C | -4.21266 | -2.25497 | 1.24415  |
| C | -4.74205 | 0.13624  | 0.75621  |
| C | -6.10534 | -2.62459 | -3.56746 |
| H | 0.10268  | -3.06985 | -5.21804 |
| H | -1.53176 | -2.46342 | -5.50182 |
| H | -0.33757 | -1.43959 | -4.69802 |
| H | -2.21494 | -4.64238 | -4.54890 |
| H | -0.62000 | -5.08000 | -3.96458 |
| H | -1.97239 | -4.98455 | -2.82840 |
| H | 0.40819  | -2.16366 | -2.15391 |
| H | -0.29392 | -3.67453 | -1.55979 |
| H | 0.85036  | -3.66832 | -2.90585 |
| H | -1.64028 | -1.34929 | 1.04165  |

|    |          |          |          |
|----|----------|----------|----------|
| H  | -2.04370 | 0.37856  | 0.88506  |
| H  | -2.56695 | -0.52009 | 2.28007  |
| H  | -4.30880 | -2.05251 | 2.31419  |
| H  | -5.18353 | -2.58761 | 0.87510  |
| H  | -3.50263 | -3.07555 | 1.11543  |
| H  | -5.73426 | -0.12608 | 0.38579  |
| H  | -4.83382 | 0.32770  | 1.82841  |
| H  | -4.43389 | 1.06418  | 0.27431  |
| C  | -7.33071 | -2.15779 | -2.78633 |
| C  | -6.22121 | -4.13715 | -3.79236 |
| C  | -6.09366 | -1.90777 | -4.92314 |
| H  | -7.43276 | -2.68214 | -1.83274 |
| H  | -7.30067 | -1.08336 | -2.58893 |
| H  | -8.23226 | -2.36235 | -3.36820 |
| H  | -5.39835 | -4.52369 | -4.39671 |
| H  | -6.22315 | -4.67626 | -2.84184 |
| H  | -7.15391 | -4.36605 | -4.31475 |
| H  | -6.02166 | -0.82535 | -4.79365 |
| H  | -5.25399 | -2.22730 | -5.54342 |
| H  | -7.01545 | -2.12542 | -5.46908 |
| Cl | -2.35696 | 1.45806  | -1.50700 |
| Si | 1.19989  | 0.61508  | -2.42064 |

**[R-P=C(Si(II)Cl)-P(O)MeR](AuCl)**

**Coordination through Si(II) atom**

**R= H**

|    |          |          |          |
|----|----------|----------|----------|
| P  | 0.77632  | -0.24722 | 1.12673  |
| C  | 0.47308  | -0.35419 | -0.49894 |
| P  | -1.03242 | -0.30820 | -1.39698 |
| Cl | 1.73654  | -2.36604 | -2.54415 |
| Si | 1.36436  | -0.35031 | -2.23004 |
| O  | -0.35426 | -0.22164 | -2.79512 |
| H  | 2.20179  | -0.26832 | 1.04949  |
| H  | -1.79886 | -1.48584 | -1.29275 |
| Au | 2.80107  | 1.26105  | -2.81441 |
| Cl | 4.23783  | 2.96510  | -3.35313 |
| C  | -2.16382 | 1.03726  | -1.10499 |
| H  | -2.95615 | 1.01586  | -1.85628 |
| H  | -2.60140 | 0.93143  | -0.10937 |
| H  | -1.61807 | 1.97964  | -1.17083 |

**R = Me**

|    |          |          |          |
|----|----------|----------|----------|
| P  | 0.80059  | -0.03016 | 1.03831  |
| C  | 0.41483  | -0.23519 | -0.55892 |
| P  | -1.13949 | -0.29909 | -1.36303 |
| Cl | 1.67991  | -2.23722 | -2.63814 |
| Si | 1.19721  | -0.23265 | -2.32588 |
| O  | -0.53244 | -0.20615 | -2.80486 |
| C  | -2.25849 | 1.06238  | -1.06428 |
| H  | -3.10364 | 1.00416  | -1.75349 |
| H  | -2.62247 | 1.02209  | -0.03543 |
| H  | -1.72119 | 1.99790  | -1.22400 |
| C  | 2.62884  | 0.00658  | 1.03178  |
| H  | 3.02048  | 0.49355  | 0.13572  |
| H  | 2.98778  | 0.51863  | 1.92564  |
| H  | 2.99840  | -1.02343 | 1.05977  |
| C  | -2.04163 | -1.82943 | -1.15786 |
| H  | -2.41378 | -1.90705 | -0.13420 |
| H  | -2.87982 | -1.86084 | -1.85727 |
| H  | -1.36153 | -2.65695 | -1.36451 |
| Au | 2.56413  | 1.40921  | -3.00621 |
| Cl | 3.95121  | 3.13850  | -3.60955 |

**R = t-Bu**

|   |         |          |         |
|---|---------|----------|---------|
| P | 0.76300 | -0.03880 | 0.82836 |
|---|---------|----------|---------|



|    |          |          |          |
|----|----------|----------|----------|
| C  | 0.55116  | -0.43035 | -0.76897 |
| P  | -1.00035 | -0.53460 | -1.60277 |
| Cl | 2.02813  | -2.57538 | -2.66434 |
| Si | 1.35726  | -0.61159 | -2.52340 |
| O  | -0.35372 | -0.76831 | -3.01632 |
| C  | -1.90681 | 1.01209  | -1.61024 |
| H  | -2.76036 | 0.95704  | -2.28739 |
| H  | -2.24525 | 1.25747  | -0.60253 |
| H  | -1.22150 | 1.78749  | -1.95699 |
| Au | 2.53894  | 1.09120  | -3.39371 |
| Cl | 3.69751  | 2.91044  | -4.19545 |
| C  | 2.58597  | 0.12180  | 1.17053  |
| C  | 3.49208  | -0.63428 | 0.21441  |
| C  | 2.86485  | 1.62901  | 1.10090  |
| C  | 2.78307  | -0.37446 | 2.60513  |
| H  | 3.25175  | -1.69839 | 0.17287  |
| H  | 3.44313  | -0.22716 | -0.79840 |
| H  | 4.53116  | -0.53597 | 0.54581  |
| H  | 2.20152  | 2.20231  | 1.75579  |
| H  | 3.89218  | 1.81678  | 1.42971  |
| H  | 2.76342  | 2.01002  | 0.08229  |
| H  | 3.81490  | -0.18629 | 2.91651  |
| H  | 2.12236  | 0.13901  | 3.30921  |
| H  | 2.60014  | -1.44895 | 2.68992  |
| C  | -2.12178 | -1.91021 | -1.16772 |
| C  | -3.20215 | -2.00353 | -2.24817 |
| C  | -1.30781 | -3.20327 | -1.13074 |
| C  | -2.73843 | -1.62831 | 0.20252  |
| H  | -3.84847 | -1.12356 | -2.26743 |
| H  | -2.76839 | -2.14170 | -3.24058 |
| H  | -3.83489 | -2.86940 | -2.03480 |
| H  | -0.52868 | -3.17110 | -0.36750 |
| H  | -1.98182 | -4.03124 | -0.89495 |
| H  | -0.83320 | -3.41201 | -2.09044 |
| H  | -3.34972 | -2.48615 | 0.49526  |
| H  | -1.97614 | -1.48772 | 0.97361  |
| H  | -3.38829 | -0.75068 | 0.19215  |

**R = Ph**

|    |          |          |          |
|----|----------|----------|----------|
| P  | 0.93615  | -0.19721 | 0.69149  |
| C  | 0.53096  | -0.30173 | -0.91648 |
| P  | -1.11197 | -0.39119 | -1.53769 |
| Cl | 1.72020  | -2.40185 | -2.96468 |
| Si | 1.10279  | -0.42302 | -2.75750 |
| O  | -0.65893 | -0.55351 | -3.03058 |
| C  | -2.06695 | 1.10831  | -1.33495 |
| H  | -3.00435 | 1.03260  | -1.88886 |
| H  | -2.27286 | 1.28940  | -0.27862 |
| H  | -1.47048 | 1.93444  | -1.72560 |
| Au | 2.23100  | 1.21772  | -3.79805 |
| Cl | 3.38096  | 2.94068  | -4.79828 |
| C  | -2.11350 | -1.78387 | -1.04101 |
| C  | -1.91486 | -3.00802 | -1.67897 |
| C  | -3.04191 | -1.67597 | -0.00611 |
| C  | -2.65067 | -4.11280 | -1.28456 |
| H  | -1.19020 | -3.08871 | -2.48081 |
| C  | -3.76868 | -2.78793 | 0.38541  |
| H  | -3.20343 | -0.73043 | 0.49851  |
| C  | -3.57412 | -4.00390 | -0.25434 |
| H  | -2.50160 | -5.06243 | -1.78448 |
| H  | -4.49087 | -2.70382 | 1.18877  |
| H  | -4.14714 | -4.87165 | 0.05151  |
| C  | 2.72431  | -0.10960 | 0.81488  |
| C  | 3.22800  | -0.26791 | 2.11157  |
| C  | 3.61305  | 0.12977  | -0.23769 |
| C  | 4.59147  | -0.21598 | 2.34766  |

|   |         |          |          |
|---|---------|----------|----------|
| H | 2.54075 | -0.43621 | 2.93521  |
| C | 4.97195 | 0.19513  | 0.00379  |
| H | 3.24542 | 0.29334  | -1.24528 |
| C | 5.46224 | 0.01553  | 1.29305  |
| H | 4.97396 | -0.34868 | 3.35288  |
| H | 5.65232 | 0.39170  | -0.81641 |
| H | 6.52993 | 0.06487  | 1.47468  |

**R = Mes**

|    |          |          |          |
|----|----------|----------|----------|
| P  | 0.88169  | 0.37527  | 0.64358  |
| C  | 0.57907  | -0.48163 | -0.74454 |
| P  | -0.87631 | -0.80595 | -1.70176 |
| Cl | 2.01843  | -3.17841 | -1.63890 |
| Si | 1.58579  | -1.21667 | -2.21148 |
| O  | -0.05187 | -1.39207 | -2.90285 |
| C  | -1.71930 | 0.65469  | -2.31426 |
| H  | -2.42267 | 0.34781  | -3.09149 |
| H  | -2.25622 | 1.17219  | -1.52115 |
| H  | -0.96672 | 1.31794  | -2.74411 |
| Au | 3.09181  | -0.00599 | -3.35752 |
| Cl | 4.59086  | 1.34263  | -4.47358 |
| C  | -2.08405 | -1.97595 | -1.05920 |
| C  | -2.31686 | -3.23045 | -1.66684 |
| C  | -2.80605 | -1.60333 | 0.09109  |
| C  | -3.25376 | -4.07220 | -1.07979 |
| C  | -3.72111 | -2.49386 | 0.63378  |
| C  | -3.95713 | -3.73761 | 0.06895  |
| H  | -3.43611 | -5.03532 | -1.54577 |
| H  | -4.26574 | -2.19991 | 1.52580  |
| C  | 2.69195  | 0.31237  | 0.80398  |
| C  | 3.29460  | -0.75283 | 1.48590  |
| C  | 3.45719  | 1.38585  | 0.32728  |
| C  | 4.67390  | -0.73953 | 1.64574  |
| C  | 4.83263  | 1.35160  | 0.50659  |
| C  | 5.46113  | 0.29431  | 1.15323  |
| H  | 5.14686  | -1.56317 | 2.17253  |
| H  | 5.42973  | 2.17246  | 0.12118  |
| C  | 2.48531  | -1.89209 | 2.03000  |
| H  | 1.60485  | -1.53870 | 2.57784  |
| H  | 2.12775  | -2.54232 | 1.22668  |
| H  | 3.07966  | -2.49911 | 2.71413  |
| C  | 2.82200  | 2.53409  | -0.39539 |
| H  | 2.59587  | 2.26106  | -1.43138 |
| H  | 1.88468  | 2.84637  | 0.07943  |
| H  | 3.48763  | 3.39730  | -0.42318 |
| C  | 6.95146  | 0.26378  | 1.29549  |
| H  | 7.41646  | -0.09122 | 0.37073  |
| H  | 7.35270  | 1.25886  | 1.49772  |
| H  | 7.26269  | -0.40399 | 2.10036  |
| C  | -2.67495 | -0.26351 | 0.75559  |
| H  | -1.67841 | 0.17490  | 0.67929  |
| H  | -3.38953 | 0.45030  | 0.33372  |
| H  | -2.89820 | -0.34712 | 1.81984  |
| C  | -1.63596 | -3.73031 | -2.90841 |
| H  | -1.71733 | -3.03104 | -3.74039 |
| H  | -0.57076 | -3.89907 | -2.74391 |
| H  | -2.08768 | -4.67498 | -3.21104 |
| C  | -4.92192 | -4.69935 | 0.68743  |
| H  | -5.43217 | -5.29435 | -0.07195 |
| H  | -4.39625 | -5.39599 | 1.34784  |
| H  | -5.67346 | -4.18264 | 1.28603  |

**R = Mes\***

|   |          |          |         |
|---|----------|----------|---------|
| P | -0.54787 | 1.62204  | 1.53692 |
| C | 0.11914  | 0.55453  | 0.44723 |
| P | 1.71358  | -0.21546 | 0.25686 |

|    |          |          |          |    |          |          |          |
|----|----------|----------|----------|----|----------|----------|----------|
| Cl | -0.93069 | 0.50772  | -2.66550 | H  | 1.73506  | 0.52865  | 2.82532  |
| O  | 1.28793  | -0.87375 | -1.11675 | H  | 2.41139  | 1.77806  | 3.82922  |
| C  | 1.83872  | -1.64882 | 1.34508  | C  | 4.84777  | 1.96978  | 2.96678  |
| H  | 2.64556  | -2.27896 | 0.96586  | H  | 4.63015  | 2.37086  | 3.96035  |
| H  | 2.01972  | -1.40972 | 2.38746  | H  | 5.90245  | 1.69497  | 2.93765  |
| H  | 0.89054  | -2.18399 | 1.25006  | H  | 4.68503  | 2.76462  | 2.23525  |
| C  | 3.41877  | 0.41507  | 0.12335  | C  | 4.20493  | -0.30365 | 3.74546  |
| C  | 4.01638  | 0.51114  | -1.16675 | H  | 5.24964  | -0.61861 | 3.73789  |
| C  | 4.26821  | 0.30766  | 1.25608  | H  | 3.99205  | 0.09935  | 4.73888  |
| C  | 5.33702  | 0.10225  | -1.28770 | H  | 3.59357  | -1.19715 | 3.61149  |
| C  | 5.59078  | -0.06931 | 1.04986  | C  | 2.21351  | 2.07581  | -2.02557 |
| C  | 6.12512  | -0.28233 | -0.21074 | H  | 1.84199  | 2.58437  | -2.91805 |
| H  | 5.77693  | 0.10499  | -2.27617 | H  | 1.36210  | 1.54725  | -1.60770 |
| H  | 6.22693  | -0.18768 | 1.91607  | H  | 2.53207  | 2.83974  | -1.31115 |
| C  | -2.30917 | 1.59170  | 1.03372  | C  | 2.99298  | 0.15987  | -3.48488 |
| C  | -2.79241 | 2.53375  | 0.10004  | H  | 2.21084  | -0.51552 | -3.14967 |
| C  | -3.15065 | 0.54678  | 1.49515  | H  | 2.63458  | 0.69002  | -4.37122 |
| C  | -3.98812 | 2.23986  | -0.55286 | H  | 3.85979  | -0.43683 | -3.78125 |
| C  | -4.31879 | 0.31166  | 0.78357  | C  | 4.43284  | 2.12150  | -3.02231 |
| C  | -4.72489 | 1.09684  | -0.28881 | H  | 4.84200  | 2.80821  | -2.27750 |
| H  | -4.34749 | 2.92302  | -1.30586 | H  | 5.26153  | 1.59321  | -3.49508 |
| H  | -4.93692 | -0.52662 | 1.06787  | H  | 3.94757  | 2.71533  | -3.80067 |
| C  | -2.12906 | 3.90618  | -0.14088 | C  | 8.22558  | -1.19781 | 0.86670  |
| C  | -2.94578 | -0.18565 | 2.83952  | H  | 8.37635  | -0.33565 | 1.52144  |
| C  | -5.96124 | 0.70338  | -1.08985 | H  | 7.65997  | -1.95472 | 1.41597  |
| C  | 3.92365  | 0.76657  | 2.68654  | H  | 9.21079  | -1.61548 | 0.64748  |
| C  | 3.38430  | 1.17352  | -2.40552 | C  | 8.38216  | 0.26104  | -1.13500 |
| C  | 7.53542  | -0.81123 | -0.43864 | H  | 7.96753  | 0.54058  | -2.10536 |
| C  | -4.02943 | -1.23957 | 3.08396  | H  | 8.44967  | 1.16506  | -0.52485 |
| H  | -3.86020 | -1.69424 | 4.06277  | H  | 9.39579  | -0.11323 | -1.30147 |
| H  | -5.03053 | -0.80372 | 3.10036  | C  | 7.45739  | -2.05597 | -1.33094 |
| H  | -3.99992 | -2.03835 | 2.33818  | H  | 6.87054  | -2.84467 | -0.85402 |
| C  | -3.06835 | 0.87606  | 3.94400  | H  | 6.99842  | -1.83468 | -2.29644 |
| H  | -2.28579 | 1.63583  | 3.86200  | H  | 8.46138  | -2.44560 | -1.51878 |
| H  | -4.03455 | 1.38342  | 3.89315  | Au | -1.80941 | -2.36449 | -0.51742 |
| H  | -2.97909 | 0.40582  | 4.92772  | Cl | -3.25039 | -4.07732 | 0.07719  |
| C  | -1.60514 | -0.90464 | 3.00934  | Si | -0.46820 | -0.60837 | -0.97211 |
| H  | -1.39642 | -1.56711 | 2.16678  |    |          |          |          |
| H  | -0.76672 | -0.21191 | 3.12786  |    |          |          |          |
| H  | -1.63974 | -1.50734 | 3.92102  |    |          |          |          |
| C  | -7.17856 | 0.61090  | -0.16238 |    |          |          |          |
| H  | -8.06547 | 0.33017  | -0.73716 |    |          |          |          |
| H  | -7.04034 | -0.14018 | 0.61742  |    |          |          |          |
| H  | -7.37673 | 1.57035  | 0.32272  |    |          |          |          |
| C  | -6.27913 | 1.70720  | -2.19478 |    |          |          |          |
| H  | -7.15627 | 1.36838  | -2.75126 |    |          |          |          |
| H  | -6.50637 | 2.69916  | -1.79451 |    |          |          |          |
| H  | -5.45439 | 1.80146  | -2.90559 |    |          |          |          |
| C  | -5.70857 | -0.66473 | -1.73639 |    |          |          |          |
| H  | -4.85785 | -0.62125 | -2.42059 |    |          |          |          |
| H  | -5.49314 | -1.43668 | -0.99514 |    |          |          |          |
| H  | -6.58871 | -0.97855 | -2.30499 |    |          |          |          |
| C  | -3.00294 | 4.80999  | -1.01497 |    |          |          |          |
| H  | -4.00242 | 4.94565  | -0.59616 |    |          |          |          |
| H  | -2.53390 | 5.79460  | -1.07952 |    |          |          |          |
| H  | -3.10109 | 4.42846  | -2.03390 |    |          |          |          |
| C  | -1.97080 | 4.61840  | 1.20962  |    |          |          |          |
| H  | -2.93683 | 4.72868  | 1.70771  |    |          |          |          |
| H  | -1.30404 | 4.07994  | 1.88825  |    |          |          |          |
| H  | -1.54601 | 5.61505  | 1.05898  |    |          |          |          |
| C  | -0.76531 | 3.82107  | -0.83123 |    |          |          |          |
| H  | -0.00181 | 3.36216  | -0.20015 |    |          |          |          |
| H  | -0.82124 | 3.24333  | -1.75489 |    |          |          |          |
| H  | -0.41614 | 4.82978  | -1.07117 |    |          |          |          |
| C  | 2.50625  | 1.29790  | 2.85262  |    |          |          |          |
| H  | 2.27014  | 2.05417  | 2.10076  |    |          |          |          |

  

| Coordination through O atom |          |          |          |
|-----------------------------|----------|----------|----------|
| R = H                       |          |          |          |
| P                           | 0.66476  | -0.20823 | 1.17026  |
| C                           | 0.42206  | -0.32631 | -0.46596 |
| P                           | -1.04642 | -0.14557 | -1.38115 |
| Cl                          | 1.23265  | -2.50103 | -2.44499 |
| Si                          | 1.51237  | -0.41935 | -2.12395 |
| O                           | -0.34044 | 0.11039  | -2.75288 |
| H                           | 2.08225  | -0.40387 | 1.16541  |
| H                           | -1.78134 | -1.34331 | -1.43844 |
| Au                          | -1.45558 | 0.31553  | -4.53488 |
| Cl                          | -2.69771 | 0.55381  | -6.35902 |
| C                           | -2.21451 | 1.13390  | -0.96080 |
| H                           | -3.01271 | 1.15892  | -1.70602 |
| H                           | -2.63661 | 0.91374  | 0.02341  |
| H                           | -1.70167 | 2.09616  | -0.93469 |

  

| R = Me |          |          |          |
|--------|----------|----------|----------|
| P      | 0.73750  | 0.04541  | 1.01710  |
| C      | 0.42074  | -0.22652 | -0.58646 |
| P      | -1.11673 | -0.23587 | -1.39784 |
| Cl     | 1.45825  | -2.47678 | -2.43161 |
| Si     | 1.39273  | -0.34591 | -2.30303 |
| O      | -0.49768 | -0.14628 | -2.84527 |
| C      | -2.22760 | 1.13556  | -1.11144 |
| H      | -3.07756 | 1.07155  | -1.79463 |
| H      | -2.58204 | 1.10237  | -0.07849 |

|    |          |          |          |
|----|----------|----------|----------|
| H  | -1.69094 | 2.06944  | -1.28130 |
| C  | 2.55995  | -0.13128 | 1.12440  |
| H  | 3.05770  | 0.20822  | 0.21334  |
| H  | 2.93403  | 0.42603  | 1.98455  |
| H  | 2.79963  | -1.18817 | 1.27616  |
| C  | -2.03262 | -1.75689 | -1.20553 |
| H  | -2.40762 | -1.82809 | -0.18208 |
| H  | -2.86718 | -1.77423 | -1.91029 |
| H  | -1.35697 | -2.58846 | -1.41081 |
| Au | -1.68137 | -0.16862 | -4.58965 |
| Cl | -2.99755 | -0.17541 | -6.37895 |

**R = t-Bu**

|    |          |          |          |
|----|----------|----------|----------|
| P  | 0.80650  | -0.34616 | 0.84989  |
| C  | 0.42923  | -0.23448 | -0.76387 |
| P  | -1.20940 | -0.30006 | -1.38588 |
| Cl | 1.81631  | -1.66666 | -3.17556 |
| Si | 1.13785  | 0.25972  | -2.55165 |
| O  | -0.78421 | -0.03453 | -2.88503 |
| C  | -2.25468 | 1.04504  | -0.82437 |
| H  | -3.18714 | 1.07169  | -1.39037 |
| H  | -2.46351 | 0.93403  | 0.24107  |
| H  | -1.71053 | 1.97658  | -0.98681 |
| Au | -2.03134 | 0.59854  | -4.46316 |
| Cl | -3.37892 | 1.26771  | -6.09895 |
| C  | 2.66249  | -0.26451 | 1.03258  |
| C  | 3.11251  | -1.71265 | 1.25473  |
| C  | 3.39687  | 0.34694  | -0.14672 |
| C  | 2.91572  | 0.55287  | 2.30207  |
| H  | 2.57799  | -2.18570 | 2.08386  |
| H  | 2.96431  | -2.31816 | 0.35781  |
| H  | 4.17963  | -1.72603 | 1.50109  |
| H  | 3.04011  | 1.35333  | -0.37659 |
| H  | 4.46586  | 0.41826  | 0.08211  |
| H  | 3.30614  | -0.27004 | -1.04423 |
| H  | 3.98315  | 0.53569  | 2.54237  |
| H  | 2.61845  | 1.59722  | 2.17586  |
| H  | 2.37293  | 0.14869  | 3.16095  |
| C  | -2.10954 | -1.88671 | -1.21967 |
| C  | -3.41392 | -1.81702 | -2.01723 |
| C  | -1.22248 | -3.00649 | -1.76203 |
| C  | -2.40575 | -2.11284 | 0.26415  |
| H  | -4.10344 | -1.06700 | -1.62509 |
| H  | -3.24216 | -1.60806 | -3.07551 |
| H  | -3.91095 | -2.78850 | -1.94559 |
| H  | -0.28092 | -3.08347 | -1.21640 |
| H  | -1.75933 | -3.95300 | -1.65550 |
| H  | -0.98852 | -2.86354 | -2.81756 |
| H  | -2.88177 | -3.09085 | 0.37441  |
| H  | -1.49770 | -2.11544 | 0.87209  |
| H  | -3.09337 | -1.36682 | 0.66854  |

**R = Ph**

|    |          |          |          |
|----|----------|----------|----------|
| P  | 0.86202  | -0.43387 | 1.07052  |
| C  | 0.41336  | -0.37308 | -0.53141 |
| P  | -1.22288 | -0.28649 | -1.11301 |
| Cl | 1.38649  | -1.70789 | -3.19999 |
| Si | 1.12269  | 0.20497  | -2.27999 |
| O  | -0.82224 | 0.30533  | -2.52424 |
| C  | -2.33176 | 0.85155  | -0.28983 |
| H  | -3.27406 | 0.92907  | -0.83525 |
| H  | -2.52427 | 0.48982  | 0.72258  |
| H  | -1.85529 | 1.83178  | -0.24868 |
| Au | -2.22651 | 0.88335  | -3.98196 |
| Cl | -3.77311 | 1.49387  | -5.45818 |
| C  | 2.66220  | -0.44483 | 1.06251  |

|   |          |          |          |
|---|----------|----------|----------|
| C | 3.28163  | -0.03689 | 2.24898  |
| C | 3.45628  | -0.82952 | -0.02248 |
| C | 4.66186  | 0.02415  | 2.33663  |
| H | 2.67132  | 0.24443  | 3.10184  |
| C | 4.83592  | -0.77406 | 0.07131  |
| H | 2.99597  | -1.21117 | -0.92712 |
| C | 5.43869  | -0.34133 | 1.24585  |
| H | 5.13308  | 0.35240  | 3.25575  |
| H | 5.44452  | -1.07556 | -0.77324 |
| H | 6.51984  | -0.30029 | 1.31420  |
| C | -2.05077 | -1.86255 | -1.26844 |
| C | -3.35725 | -1.91449 | -1.75950 |
| C | -1.38345 | -3.03833 | -0.93285 |
| C | -3.98728 | -3.13749 | -1.90678 |
| H | -3.87668 | -1.00900 | -2.05373 |
| C | -2.02501 | -4.25783 | -1.07595 |
| H | -0.36359 | -2.99568 | -0.57125 |
| C | -3.32324 | -4.30687 | -1.56088 |
| H | -4.99672 | -3.17729 | -2.29804 |
| H | -1.50522 | -5.17205 | -0.81547 |
| H | -3.82069 | -5.26296 | -1.67697 |

**R = Mes**

|    |          |          |          |
|----|----------|----------|----------|
| P  | 1.09250  | -1.00675 | 1.31746  |
| C  | 0.43175  | -0.85324 | -0.19863 |
| P  | -1.26966 | -0.77431 | -0.61907 |
| Cl | 1.08389  | -1.46917 | -3.16032 |
| Si | 0.96419  | 0.17787  | -1.78574 |
| O  | -1.02565 | 0.29058  | -1.77344 |
| C  | -2.27387 | -0.09074 | 0.70097  |
| H  | -3.30483 | 0.06314  | 0.38719  |
| H  | -2.25008 | -0.80423 | 1.52971  |
| H  | -1.84017 | 0.85641  | 1.02406  |
| Au | -1.71464 | 2.30091  | -1.79244 |
| Cl | -2.45435 | 4.39807  | -1.80076 |
| C  | 2.83593  | -0.53048 | 1.07370  |
| C  | 3.25389  | 0.71284  | 1.57254  |
| C  | 3.76322  | -1.41241 | 0.50048  |
| C  | 4.59237  | 1.06358  | 1.46577  |
| C  | 5.09340  | -1.02020 | 0.42087  |
| C  | 5.52790  | 0.21372  | 0.88880  |
| H  | 4.91255  | 2.02950  | 1.84542  |
| H  | 5.81399  | -1.70526 | -0.01635 |
| C  | -2.13190 | -2.21598 | -1.27735 |
| C  | -3.37265 | -2.00034 | -1.91449 |
| C  | -1.62454 | -3.52755 | -1.15522 |
| C  | -4.06320 | -3.09402 | -2.42152 |
| C  | -2.36881 | -4.57783 | -1.67304 |
| C  | -3.58461 | -4.38924 | -2.31506 |
| H  | -5.01046 | -2.91661 | -2.92145 |
| H  | -1.97251 | -5.58364 | -1.57736 |
| C  | 2.27440  | 1.67517  | 2.17455  |
| H  | 1.65664  | 2.14179  | 1.40083  |
| H  | 1.59456  | 1.17885  | 2.87588  |
| H  | 2.78763  | 2.47185  | 2.71437  |
| C  | 6.96175  | 0.62539  | 0.75687  |
| H  | 7.12096  | 1.17131  | -0.17833 |
| H  | 7.26458  | 1.28325  | 1.57352  |
| H  | 7.62623  | -0.24027 | 0.74721  |
| C  | 3.35674  | -2.75768 | -0.02318 |
| H  | 2.67298  | -3.27072 | 0.65989  |
| H  | 2.84673  | -2.66893 | -0.98699 |
| H  | 4.22921  | -3.39667 | -0.16572 |
| C  | -0.31775 | -3.87144 | -0.50779 |
| H  | 0.51425  | -3.37657 | -1.01009 |
| H  | -0.28588 | -3.58018 | 0.54402  |

|   |          |          |          |
|---|----------|----------|----------|
| H | -0.15492 | -4.94810 | -0.56011 |
| C | -4.03797 | -0.66234 | -2.07621 |
| H | -3.35154 | 0.18171  | -2.11419 |
| H | -4.61139 | -0.64668 | -3.00377 |
| H | -4.74948 | -0.48353 | -1.26363 |
| C | -4.33393 | -5.54420 | -2.90014 |
| H | -3.94404 | -5.78794 | -3.89324 |
| H | -4.23158 | -6.43842 | -2.28263 |
| H | -5.39535 | -5.31779 | -3.00970 |

**R = Mes\***

|   |          |          |          |
|---|----------|----------|----------|
| P | 2.05797  | 1.94983  | -0.47768 |
| C | 1.05099  | 0.63354  | -0.34499 |
| P | -0.69688 | 0.47391  | -0.50853 |
| C | 3.71769  | 1.16036  | -0.34934 |
| C | 4.41265  | 1.23405  | 0.89063  |
| C | 4.24225  | 0.37337  | -1.39406 |
| C | 5.44252  | 0.33460  | 1.10939  |
| C | 5.27613  | -0.51627 | -1.08799 |
| C | 5.85065  | -0.60198 | 0.16314  |
| H | 5.95077  | 0.34817  | 2.06221  |
| H | 5.64237  | -1.15929 | -1.87594 |
| C | 3.90483  | 0.47630  | -2.89685 |
| C | 4.12483  | 2.30215  | 1.96426  |
| C | 6.92105  | -1.62754 | 0.51962  |
| C | 2.76220  | 2.11011  | 2.63504  |
| H | 1.92940  | 2.30150  | 1.95515  |
| H | 2.64752  | 1.09297  | 3.01419  |
| H | 2.66073  | 2.81033  | 3.46957  |
| C | 4.20379  | 3.69624  | 1.32691  |
| H | 5.18843  | 3.86385  | 0.88373  |
| H | 3.45376  | 3.84454  | 0.54716  |
| H | 4.03732  | 4.46304  | 2.08880  |
| C | 5.16740  | 2.27785  | 3.08568  |
| H | 5.12381  | 1.35643  | 3.67102  |
| H | 6.18403  | 2.40405  | 2.70628  |
| H | 4.96405  | 3.10566  | 3.76883  |
| C | 3.44612  | -0.87325 | -3.45876 |
| H | 2.54852  | -1.23010 | -2.94834 |
| H | 3.22576  | -0.77591 | -4.52573 |
| H | 4.21114  | -1.64370 | -3.35006 |
| C | 2.86075  | 1.52394  | -3.27352 |
| H | 1.85028  | 1.22968  | -2.99148 |
| H | 3.08084  | 2.50443  | -2.83868 |
| H | 2.86513  | 1.65202  | -4.35990 |
| C | 5.19920  | 0.90357  | -3.61437 |
| H | 5.54012  | 1.87785  | -3.25464 |
| H | 6.01002  | 0.19044  | -3.46504 |
| H | 5.01559  | 0.98157  | -4.68961 |
| C | 7.22429  | -2.57416 | -0.63852 |
| H | 7.62945  | -2.04402 | -1.50451 |
| H | 7.97188  | -3.30635 | -0.32415 |
| H | 6.33487  | -3.12471 | -0.95481 |
| C | 6.42852  | -2.46398 | 1.70711  |
| H | 6.24000  | -1.84488 | 2.58642  |
| H | 5.49923  | -2.98304 | 1.46151  |
| H | 7.17945  | -3.21155 | 1.97785  |
| C | 8.21853  | -0.90867 | 0.90702  |
| H | 8.07656  | -0.24833 | 1.76492  |
| H | 8.98785  | -1.63894 | 1.17315  |
| H | 8.59465  | -0.30529 | 0.07695  |
| C | -2.13555 | 1.32394  | 0.20192  |
| C | -2.73750 | 0.75489  | 1.36089  |
| C | -2.93652 | 2.12579  | -0.65260 |
| C | -4.12092 | 0.65712  | 1.37389  |
| C | -4.31659 | 1.99782  | -0.55879 |

|    |          |          |          |
|----|----------|----------|----------|
| C  | -4.93374 | 1.17544  | 0.37388  |
| H  | -4.58452 | 0.15416  | 2.21287  |
| H  | -4.93061 | 2.57196  | -1.23935 |
| C  | -2.00359 | 0.40492  | 2.66810  |
| C  | -2.03581 | -1.08745 | 3.00375  |
| C  | -2.73472 | 1.16207  | 3.79588  |
| H  | -1.41973 | -1.67054 | 2.32145  |
| H  | -1.65036 | -1.24073 | 4.01538  |
| H  | -3.05315 | -1.48329 | 2.96823  |
| H  | -2.80055 | 2.23122  | 3.57983  |
| H  | -3.74335 | 0.78749  | 3.97254  |
| H  | -2.17186 | 1.03650  | 4.72425  |
| C  | -2.41279 | 3.27594  | -1.53415 |
| C  | -3.03547 | 4.56025  | -0.94793 |
| C  | -2.85479 | 3.16468  | -2.99596 |
| H  | -2.76082 | 4.68280  | 0.10223  |
| H  | -2.66518 | 5.42766  | -1.50118 |
| H  | -4.12361 | 4.55801  | -1.01440 |
| H  | -2.44990 | 2.28166  | -3.49075 |
| H  | -3.94169 | 3.11917  | -3.08399 |
| H  | -2.51688 | 4.04402  | -3.55057 |
| C  | -6.43256 | 0.91024  | 0.38802  |
| C  | -7.04820 | 1.49994  | 1.66276  |
| C  | -6.66113 | -0.60641 | 0.36398  |
| H  | -6.89659 | 2.58139  | 1.71050  |
| H  | -8.12396 | 1.30586  | 1.68056  |
| H  | -6.61678 | 1.05871  | 2.56334  |
| H  | -6.22175 | -1.06425 | -0.52475 |
| H  | -6.22013 | -1.09870 | 1.23248  |
| H  | -7.73340 | -0.81985 | 0.36706  |
| Cl | 1.84433  | -1.60238 | 1.77940  |
| O  | -0.68593 | -1.01531 | 0.05972  |
| Au | -2.26854 | -2.36218 | -0.35500 |
| Cl | -3.95834 | -3.74426 | -0.80804 |
| C  | -0.90449 | 3.48864  | -1.45070 |
| H  | -0.56895 | 3.57308  | -0.41472 |
| H  | -0.30993 | 2.71575  | -1.93595 |
| H  | -0.64460 | 4.42347  | -1.95311 |
| C  | -0.57160 | 0.92336  | 2.68802  |
| H  | 0.08944  | 0.40173  | 2.00039  |
| H  | -0.53828 | 1.99442  | 2.47130  |
| H  | -0.14732 | 0.77018  | 3.68318  |
| C  | -7.13762 | 1.52473  | -0.81819 |
| H  | -7.07221 | 2.61619  | -0.82184 |
| H  | -6.72905 | 1.14864  | -1.75943 |
| H  | -8.19769 | 1.26300  | -0.79050 |
| C  | -1.06784 | 0.22128  | -2.26015 |
| H  | -2.10765 | -0.09096 | -2.36957 |
| H  | -0.86902 | 1.09098  | -2.87881 |
| H  | -0.41524 | -0.59731 | -2.57585 |
| Si | 1.24843  | -1.33114 | -0.24689 |

**Coordination through P(sp<sup>2</sup>) atom**

**R = H**

|    |          |          |          |
|----|----------|----------|----------|
| P  | 0.52080  | 0.09607  | 1.12056  |
| C  | 0.31683  | -0.25053 | -0.46524 |
| P  | -1.12466 | -0.26803 | -1.44637 |
| Cl | 1.30083  | -2.61348 | -2.16580 |
| Si | 1.34907  | -0.47598 | -2.18798 |
| O  | -0.41220 | -0.20463 | -2.81415 |
| H  | 1.90287  | -0.03317 | 1.37824  |
| H  | -1.80225 | -1.49011 | -1.27632 |
| Au | -0.93798 | 0.68391  | 2.66256  |
| Cl | -2.49413 | 1.29589  | 4.17703  |
| C  | -2.35559 | 1.00400  | -1.23253 |
| H  | -2.80502 | 0.90924  | -0.24055 |

|   |          |         |          |
|---|----------|---------|----------|
| H | -1.88523 | 1.98312 | -1.33055 |
| H | -3.12828 | 0.88794 | -1.99586 |

#### R = Me

|    |          |          |          |
|----|----------|----------|----------|
| P  | 0.82918  | 0.00873  | 0.94003  |
| C  | 0.39670  | -0.23576 | -0.61622 |
| P  | -1.18321 | -0.27650 | -1.35940 |
| Cl | 1.34077  | -2.46986 | -2.53786 |
| Si | 1.15781  | -0.32684 | -2.47059 |
| O  | -0.67038 | -0.20607 | -2.82336 |
| C  | -2.28874 | 1.08064  | -0.99246 |
| H  | -3.17497 | 1.00870  | -1.62701 |
| H  | -2.58710 | 1.04300  | 0.05783  |
| H  | -1.77527 | 2.02179  | -1.19127 |
| C  | 2.62266  | -0.10691 | 1.13138  |
| H  | 3.11056  | -0.07939 | 0.15677  |
| H  | 2.97364  | 0.71209  | 1.76150  |
| H  | 2.86322  | -1.04747 | 1.63389  |
| C  | -2.04758 | -1.80621 | -1.03330 |
| H  | -2.34234 | -1.84689 | 0.01764  |
| H  | -2.93444 | -1.86574 | -1.66798 |
| H  | -1.37311 | -2.63178 | -1.26460 |
| Au | -0.51342 | 0.39698  | 2.65179  |
| Cl | -1.96349 | 0.78708  | 4.34374  |

#### R = t-Bu

|    |          |          |          |
|----|----------|----------|----------|
| P  | 0.81316  | 0.08370  | 0.86464  |
| C  | 0.47748  | -0.38505 | -0.67373 |
| P  | -1.08177 | -0.52828 | -1.46909 |
| Cl | 1.91785  | -2.56672 | -2.51193 |
| Si | 1.29247  | -0.51764 | -2.49714 |
| O  | -0.49917 | -0.72602 | -2.90273 |
| C  | -2.07039 | 0.96744  | -1.40086 |
| H  | -2.97115 | 0.86162  | -2.00749 |
| H  | -2.34288 | 1.19548  | -0.36870 |
| H  | -1.46271 | 1.78143  | -1.79875 |
| Au | -0.66543 | 0.77376  | 2.36842  |
| Cl | -2.24204 | 1.49165  | 3.83140  |
| C  | 2.62677  | 0.01955  | 1.23731  |
| C  | 2.83485  | 0.54899  | 2.65335  |
| C  | 3.08453  | -1.43716 | 1.14039  |
| C  | 3.37323  | 0.89095  | 0.22915  |
| H  | 2.50427  | 1.58517  | 2.75553  |
| H  | 2.30136  | -0.04971 | 3.39533  |
| H  | 3.90123  | 0.50992  | 2.89291  |
| H  | 2.93676  | -1.84522 | 0.13939  |
| H  | 4.15205  | -1.48666 | 1.37764  |
| H  | 2.55586  | -2.07426 | 1.85408  |
| H  | 4.44566  | 0.83628  | 0.44040  |
| H  | 3.22082  | 0.56019  | -0.80122 |
| H  | 3.07062  | 1.93844  | 0.29855  |
| C  | -2.12266 | -1.95989 | -0.99524 |
| C  | -1.24212 | -3.20242 | -0.87865 |
| C  | -2.82349 | -1.67829 | 0.33214  |
| C  | -3.14747 | -2.15305 | -2.11776 |
| H  | -0.70691 | -3.41371 | -1.80494 |
| H  | -0.50591 | -3.10308 | -0.07942 |
| H  | -1.88197 | -4.05849 | -0.64722 |
| H  | -3.51603 | -0.83673 | 0.27128  |
| H  | -3.40313 | -2.56175 | 0.61327  |
| H  | -2.11607 | -1.48115 | 1.14136  |
| H  | -3.74757 | -3.03749 | -1.88709 |
| H  | -3.83359 | -1.30776 | -2.20579 |
| H  | -2.66310 | -2.31359 | -3.08236 |

#### R = Ph

|    |          |          |          |
|----|----------|----------|----------|
| P  | 0.81940  | -0.13983 | 0.99360  |
| C  | 0.42602  | -0.20031 | -0.59811 |
| P  | -1.17527 | -0.21895 | -1.30536 |
| Cl | 1.64605  | -1.88500 | -2.97264 |
| Si | 1.12525  | 0.12909  | -2.43115 |
| O  | -0.70303 | 0.04074  | -2.76307 |
| C  | -2.29129 | 1.06512  | -0.75043 |
| H  | -3.19149 | 1.04847  | -1.36807 |
| H  | -2.56286 | 0.91150  | 0.29599  |
| H  | -1.78767 | 2.02738  | -0.85260 |
| Au | -0.61829 | 0.03786  | 2.67204  |
| Cl | -2.20266 | 0.19504  | 4.28472  |
| C  | -2.02087 | -1.78819 | -1.17697 |
| C  | -2.72546 | -2.12232 | -0.01990 |
| C  | -1.94813 | -2.68440 | -2.24067 |
| C  | -3.35848 | -3.35019 | 0.06594  |
| H  | -2.77646 | -1.43864 | 0.82119  |
| C  | -2.58998 | -3.90920 | -2.14640 |
| H  | -1.38841 | -2.42046 | -3.12953 |
| C  | -3.29239 | -4.24097 | -0.99743 |
| H  | -3.90328 | -3.61097 | 0.96542  |
| H  | -2.53657 | -4.60733 | -2.97336 |
| H  | -3.79058 | -5.20117 | -0.92714 |
| C  | 2.57554  | -0.20944 | 1.26677  |
| C  | 3.46890  | -0.59846 | 0.26451  |
| C  | 3.05532  | 0.14947  | 2.52919  |
| C  | 4.82722  | -0.60636 | 0.52534  |
| H  | 3.10075  | -0.92246 | -0.70184 |
| C  | 4.41599  | 0.13958  | 2.77974  |
| H  | 2.35707  | 0.43999  | 3.30760  |
| C  | 5.30083  | -0.23478 | 1.77758  |
| H  | 5.51952  | -0.91149 | -0.25034 |
| H  | 4.78676  | 0.42226  | 3.75780  |
| H  | 6.36657  | -0.24574 | 1.97565  |

#### R = Mes

|    |          |          |          |
|----|----------|----------|----------|
| P  | 0.81724  | -0.24990 | 1.54774  |
| C  | 0.31489  | -0.39943 | -0.00462 |
| P  | -1.22637 | -0.29338 | -0.84164 |
| Cl | 1.47166  | -1.77354 | -2.57772 |
| Si | 1.19284  | 0.18326  | -1.70544 |
| O  | -0.61233 | 0.39173  | -2.09718 |
| C  | -2.45031 | 0.80408  | -0.12109 |
| H  | -3.24697 | 0.95922  | -0.85221 |
| H  | -2.87840 | 0.37524  | 0.78571  |
| H  | -1.97531 | 1.75737  | 0.11442  |
| Au | -0.38219 | -0.05373 | 3.40107  |
| Cl | -1.64133 | 0.17738  | 5.27133  |
| C  | -2.03891 | -1.85276 | -1.24310 |
| C  | -2.31001 | -2.77794 | -0.21722 |
| C  | -2.44983 | -2.12598 | -2.56660 |
| C  | -2.96037 | -3.96338 | -0.53060 |
| C  | -3.09602 | -3.33050 | -2.81546 |
| C  | -3.35295 | -4.26703 | -1.82473 |
| H  | -3.16794 | -4.66705 | 0.26952  |
| H  | -3.41613 | -3.53774 | -3.83173 |
| C  | 2.61407  | -0.17755 | 1.59096  |
| C  | 3.36441  | -1.35052 | 1.41811  |
| C  | 3.23996  | 1.05450  | 1.83617  |
| C  | 4.74767  | -1.26006 | 1.49554  |
| C  | 4.62503  | 1.08973  | 1.89916  |
| C  | 5.39616  | -0.05498 | 1.73560  |
| H  | 5.33646  | -2.16265 | 1.36367  |
| H  | 5.11579  | 2.04183  | 2.07654  |
| C  | -1.91235 | -2.56700 | 1.21156  |

|   |          |          |          |
|---|----------|----------|----------|
| H | -0.85639 | -2.80536 | 1.36264  |
| H | -2.05923 | -1.54424 | 1.56284  |
| H | -2.49396 | -3.21495 | 1.86763  |
| C | -2.24709 | -1.20999 | -3.73934 |
| H | -2.57863 | -0.18973 | -3.54459 |
| H | -1.19274 | -1.14976 | -4.01326 |
| H | -2.80481 | -1.59070 | -4.59530 |
| C | -4.02004 | -5.56698 | -2.14702 |
| H | -4.72506 | -5.45921 | -2.97306 |
| H | -3.27745 | -6.31298 | -2.44688 |
| H | -4.55529 | -5.96592 | -1.28397 |
| C | 6.88834  | 0.00509  | 1.84257  |
| H | 7.20492  | -0.11542 | 2.88341  |
| H | 7.36143  | -0.78843 | 1.26203  |
| H | 7.27380  | 0.96456  | 1.49345  |
| C | 2.71895  | -2.67722 | 1.15287  |
| H | 1.91199  | -2.88209 | 1.86353  |
| H | 2.28939  | -2.71459 | 0.14784  |
| H | 3.44858  | -3.48290 | 1.23898  |
| C | 2.44790  | 2.31706  | 1.98798  |
| H | 1.94124  | 2.57471  | 1.05266  |
| H | 1.68056  | 2.22378  | 2.76329  |
| H | 3.09451  | 3.15230  | 2.25780  |

**R = Mes\***

|    |          |          |          |
|----|----------|----------|----------|
| P  | -1.19686 | 0.73093  | 0.04173  |
| C  | -0.20913 | -0.49676 | 0.50350  |
| P  | 1.48836  | -0.84662 | 0.87492  |
| Cl | -1.17471 | -3.34440 | -0.71975 |
| O  | 1.26194  | -2.39433 | 0.86411  |
| C  | 3.10251  | -0.52324 | 0.08483  |
| C  | 3.64058  | -1.55560 | -0.73465 |
| C  | 3.99925  | 0.40148  | 0.68158  |
| C  | 4.98979  | -1.84709 | -0.59311 |
| C  | 5.34199  | 0.04868  | 0.76432  |
| C  | 5.84881  | -1.12187 | 0.22212  |
| H  | 5.38894  | -2.67690 | -1.16200 |
| H  | 6.01603  | 0.73284  | 1.26106  |
| C  | -2.89266 | 0.07419  | 0.11071  |
| C  | -3.51175 | -0.41369 | -1.07262 |
| C  | -3.49316 | -0.15421 | 1.37319  |
| C  | -4.58075 | -1.28854 | -0.92348 |
| C  | -4.55427 | -1.05282 | 1.42547  |
| C  | -5.08068 | -1.67752 | 0.31027  |
| H  | -5.03236 | -1.70231 | -1.80935 |
| H  | -4.98740 | -1.27137 | 2.39287  |
| C  | -3.14658 | 0.03645  | -2.50214 |
| C  | -3.19620 | 0.55626  | 2.71315  |
| C  | -6.18370 | -2.71903 | 0.46493  |
| C  | 3.66326  | 1.85223  | 1.07159  |
| C  | 2.89925  | -2.27613 | -1.87397 |
| C  | 7.29413  | -1.56708 | 0.40640  |
| C  | -4.49366 | 1.26604  | 3.14423  |
| H  | -4.33117 | 1.77633  | 4.09745  |
| H  | -4.79172 | 2.01387  | 2.40519  |
| H  | -5.32594 | 0.57457  | 3.27511  |
| C  | -2.13129 | 1.64838  | 2.68131  |
| H  | -1.12091 | 1.25629  | 2.56190  |
| H  | -2.31981 | 2.39305  | 1.90342  |
| H  | -2.14923 | 2.18003  | 3.63683  |
| C  | -2.79812 | -0.46169 | 3.78766  |
| H  | -3.58950 | -1.18845 | 3.97830  |
| H  | -1.90890 | -1.02194 | 3.48933  |
| H  | -2.59047 | 0.05575  | 4.72862  |
| C  | -7.40160 | -2.08655 | 1.14805  |
| H  | -8.19363 | -2.83109 | 1.26692  |

|    |          |          |          |
|----|----------|----------|----------|
| H  | -7.15757 | -1.70122 | 2.14012  |
| H  | -7.79856 | -1.25929 | 0.55442  |
| C  | -6.63131 | -3.29415 | -0.87629 |
| H  | -7.40305 | -4.04902 | -0.70792 |
| H  | -7.05898 | -2.52763 | -1.52779 |
| H  | -5.80630 | -3.77709 | -1.40554 |
| C  | -5.65390 | -3.87023 | 1.32887  |
| H  | -4.77945 | -4.33434 | 0.86702  |
| H  | -5.36170 | -3.52766 | 2.32360  |
| H  | -6.42628 | -4.63482 | 1.45074  |
| C  | -3.98508 | -0.68281 | -3.56421 |
| H  | -5.05463 | -0.49527 | -3.44851 |
| H  | -3.69568 | -0.30333 | -4.54647 |
| H  | -3.81366 | -1.76205 | -3.56338 |
| C  | -3.46512 | 1.53224  | -2.62940 |
| H  | -4.52471 | 1.71844  | -2.43784 |
| H  | -2.88769 | 2.14188  | -1.93083 |
| H  | -3.23304 | 1.88111  | -3.63933 |
| C  | -1.68612 | -0.22881 | -2.87698 |
| H  | -0.97902 | 0.41121  | -2.34488 |
| H  | -1.41123 | -1.26757 | -2.68997 |
| H  | -1.54270 | -0.01263 | -3.93941 |
| C  | 2.22884  | 2.25508  | 0.75675  |
| H  | 1.98210  | 2.02786  | -0.28272 |
| H  | 1.47642  | 1.79360  | 1.39484  |
| H  | 2.11263  | 3.33356  | 0.88161  |
| C  | 4.53591  | 2.74417  | 0.16314  |
| H  | 4.29240  | 3.79348  | 0.34788  |
| H  | 5.60174  | 2.60719  | 0.34786  |
| H  | 4.34324  | 2.53382  | -0.89110 |
| C  | 4.01068  | 2.18357  | 2.52568  |
| H  | 5.06745  | 2.00739  | 2.73598  |
| H  | 3.80914  | 3.24045  | 2.71768  |
| H  | 3.43245  | 1.59814  | 3.24088  |
| C  | 1.57917  | -1.60186 | -2.23002 |
| H  | 1.17443  | -2.06160 | -3.13480 |
| H  | 0.81175  | -1.72075 | -1.47027 |
| H  | 1.72287  | -0.53699 | -2.43237 |
| C  | 2.69113  | -3.76486 | -1.58455 |
| H  | 2.04179  | -3.91785 | -0.72570 |
| H  | 2.23328  | -4.24682 | -2.45244 |
| H  | 3.64565  | -4.26158 | -1.39182 |
| C  | 3.77500  | -2.14967 | -3.13695 |
| H  | 4.00834  | -1.10498 | -3.35658 |
| H  | 4.71336  | -2.70019 | -3.06304 |
| H  | 3.22416  | -2.55988 | -3.98700 |
| C  | 8.06705  | -0.64777 | 1.34828  |
| H  | 8.15665  | 0.36571  | 0.94905  |
| H  | 7.59871  | -0.59066 | 2.33416  |
| H  | 9.07956  | -1.03455 | 1.48467  |
| C  | 8.00765  | -1.57912 | -0.95090 |
| H  | 7.53246  | -2.26543 | -1.65435 |
| H  | 8.00973  | -0.58371 | -1.40159 |
| H  | 9.04594  | -1.89773 | -0.82474 |
| C  | 7.30324  | -2.98209 | 0.99736  |
| H  | 6.81372  | -3.00226 | 1.97407  |
| H  | 6.78773  | -3.69442 | 0.35036  |
| H  | 8.33237  | -3.32843 | 1.12505  |
| Au | -0.73324 | 2.82226  | -0.56201 |
| Cl | -0.26242 | 4.97400  | -1.12399 |
| C  | 1.71792  | -0.48292 | 2.63245  |
| H  | 2.66615  | -0.91972 | 2.95034  |
| H  | 1.68727  | 0.56963  | 2.89285  |
| H  | 0.89973  | -1.00344 | 3.13732  |
| Si | -0.58214 | -2.38851 | 1.10888  |

**Coordination through  $\pi(\text{C}=\text{P})$  bond****R = H**

|    |          |          |          |
|----|----------|----------|----------|
| P  | 0.79512  | 0.12658  | 1.06714  |
| C  | 0.34430  | -0.00946 | -0.59215 |
| P  | -1.20474 | -0.34908 | -1.34696 |
| Cl | 1.26030  | -2.61556 | -1.91988 |
| Si | 1.15467  | -0.52025 | -2.38355 |
| O  | -0.68647 | -0.46554 | -2.79591 |
| H  | 2.19726  | -0.08607 | 0.89072  |
| H  | -1.68258 | -1.58526 | -0.87188 |
| Au | 0.67599  | 2.09378  | -0.26566 |
| Cl | 0.83791  | 4.31669  | -0.56531 |
| C  | -2.58142 | 0.77938  | -1.20671 |
| H  | -3.40643 | 0.41199  | -1.82150 |
| H  | -2.90089 | 0.83430  | -0.16337 |
| H  | -2.28014 | 1.76981  | -1.55079 |

**R = Me**

|    |          |          |          |
|----|----------|----------|----------|
| P  | 0.73399  | 0.02117  | 1.11523  |
| C  | 0.28023  | 0.15562  | -0.54015 |
| P  | -1.25573 | -0.17984 | -1.33383 |
| Cl | 1.53725  | -2.14233 | -2.19419 |
| Si | 1.11113  | -0.02851 | -2.37439 |
| O  | -0.70323 | -0.15935 | -2.78399 |
| C  | -2.59740 | 0.99304  | -1.15811 |
| H  | -3.42207 | 0.69269  | -1.80899 |
| H  | -2.94083 | 1.01708  | -0.12199 |
| H  | -2.25139 | 1.98605  | -1.44741 |
| C  | 2.54700  | -0.24168 | 1.03764  |
| H  | 3.00821  | 0.18011  | 0.14475  |
| H  | 3.00959  | 0.17431  | 1.93449  |
| H  | 2.71303  | -1.32399 | 1.03817  |
| C  | -1.88404 | -1.79593 | -0.89291 |
| H  | -2.21962 | -1.79338 | 0.14640  |
| H  | -2.71787 | -2.05371 | -1.54931 |
| H  | -1.07851 | -2.51992 | -1.02323 |
| Au | 0.46610  | 2.18956  | 0.15146  |
| Cl | 0.50659  | 4.43691  | 0.31490  |

**R = *t*-Bu**

|    |          |          |          |
|----|----------|----------|----------|
| P  | 0.65291  | 0.12625  | 0.95636  |
| C  | 0.34309  | 0.11622  | -0.74378 |
| P  | -1.19409 | -0.30341 | -1.53242 |
| Cl | 2.03136  | -1.92027 | -2.57186 |
| Si | 1.15213  | 0.04541  | -2.59630 |
| O  | -0.60021 | -0.44549 | -2.96400 |
| C  | -2.44785 | 0.98463  | -1.53822 |
| H  | -3.30897 | 0.66378  | -2.12749 |
| H  | -2.76437 | 1.22802  | -0.52360 |
| H  | -2.01526 | 1.87383  | -1.99931 |
| Au | 0.39782  | 2.20913  | -0.16990 |
| Cl | 0.38161  | 4.46506  | -0.09682 |
| C  | 2.49249  | -0.05388 | 1.22998  |
| C  | 2.71155  | -1.56676 | 1.34959  |
| C  | 3.39004  | 0.53179  | 0.15343  |
| C  | 2.76795  | 0.61968  | 2.57578  |
| H  | 2.05135  | -2.01987 | 2.09598  |
| H  | 2.55765  | -2.06882 | 0.39211  |
| H  | 3.74167  | -1.75423 | 1.66979  |
| H  | 3.24613  | 1.60922  | 0.04553  |
| H  | 4.43746  | 0.36180  | 0.42554  |
| H  | 3.23128  | 0.05976  | -0.81765 |
| H  | 3.80796  | 0.44178  | 2.86528  |
| H  | 2.61426  | 1.70048  | 2.52365  |

|   |          |          |          |
|---|----------|----------|----------|
| H | 2.12769  | 0.22350  | 3.36891  |
| C | -1.98348 | -1.86322 | -0.97792 |
| C | -2.97847 | -2.28084 | -2.06490 |
| C | -0.92248 | -2.94912 | -0.81339 |
| C | -2.69971 | -1.61754 | 0.35049  |
| H | -3.79321 | -1.56356 | -2.18447 |
| H | -2.48556 | -2.41341 | -3.02955 |
| H | -3.42466 | -3.23688 | -1.77747 |
| H | -0.21243 | -2.70823 | -0.02067 |
| H | -1.42337 | -3.88300 | -0.54307 |
| H | -0.35873 | -3.11392 | -1.73206 |
| H | -3.10759 | -2.56701 | 0.70801  |
| H | -2.01948 | -1.24195 | 1.11977  |
| H | -3.53312 | -0.91940 | 0.25006  |

**R = Ph**

|    |          |          |          |
|----|----------|----------|----------|
| P  | 0.70787  | 0.10921  | 1.06131  |
| C  | 0.23806  | 0.17027  | -0.59914 |
| P  | -1.39641 | -0.05408 | -1.22169 |
| Cl | 1.28160  | -1.69721 | -3.02206 |
| Si | 0.79280  | 0.34200  | -2.53314 |
| O  | -1.05219 | 0.20509  | -2.71308 |
| C  | -2.69387 | 1.05016  | -0.66641 |
| H  | -3.60874 | 0.82537  | -1.21889 |
| H  | -2.87346 | 0.90855  | 0.40118  |
| H  | -2.39086 | 2.08224  | -0.84835 |
| Au | 0.55256  | 2.23973  | -0.02696 |
| Cl | 0.76380  | 4.48273  | 0.11155  |
| C  | 2.49179  | -0.17711 | 1.09666  |
| C  | 3.11695  | 0.08316  | 2.32006  |
| C  | 3.24845  | -0.66529 | 0.03013  |
| C  | 4.47981  | -0.11073 | 2.46513  |
| H  | 2.52999  | 0.45064  | 3.15635  |
| C  | 4.60917  | -0.86786 | 0.18379  |
| H  | 2.77090  | -0.91171 | -0.91030 |
| C  | 5.22639  | -0.58527 | 1.39561  |
| H  | 4.95974  | 0.10520  | 3.41253  |
| H  | 5.19097  | -1.24960 | -0.64717 |
| H  | 6.29307  | -0.74256 | 1.50840  |
| C  | -1.99050 | -1.72608 | -0.98206 |
| C  | -2.10542 | -2.57675 | -2.07720 |
| C  | -2.34516 | -2.16792 | 0.29218  |
| C  | -2.58465 | -3.86517 | -1.89506 |
| H  | -1.80927 | -2.23038 | -3.05953 |
| C  | -2.81875 | -3.45669 | 0.46567  |
| H  | -2.23964 | -1.51571 | 1.15344  |
| C  | -2.94062 | -4.30335 | -0.62881 |
| H  | -2.67248 | -4.52982 | -2.74629 |
| H  | -3.09053 | -3.80297 | 1.45582  |
| H  | -3.31093 | -5.31267 | -0.49034 |

**R = Mes**

|    |          |          |          |
|----|----------|----------|----------|
| P  | 0.68804  | 0.13128  | 1.43370  |
| C  | 0.05059  | 0.22346  | -0.18946 |
| P  | -1.59992 | -0.03189 | -0.78819 |
| Cl | 1.42934  | -0.10540 | -3.26185 |
| Si | 0.36921  | 1.13173  | -1.91808 |
| O  | -1.34122 | 0.63043  | -2.18553 |
| C  | -2.96584 | 0.87373  | -0.04952 |
| H  | -3.87366 | 0.66980  | -0.62174 |
| H  | -3.12187 | 0.60022  | 0.99196  |
| H  | -2.72500 | 1.93669  | -0.11161 |
| Au | 0.35107  | 2.30928  | 0.35255  |
| Cl | 0.71241  | 4.45003  | 1.06130  |
| C  | 2.48223  | -0.12355 | 1.25270  |
| C  | 3.35046  | 0.68140  | 2.01378  |

|   |          |          |          |
|---|----------|----------|----------|
| C | 2.99684  | -1.20462 | 0.50992  |
| C | 4.71856  | 0.44934  | 1.94146  |
| C | 4.37081  | -1.39652 | 0.47937  |
| C | 5.25218  | -0.56897 | 1.16542  |
| H | 5.38447  | 1.08256  | 2.52030  |
| H | 4.76500  | -2.23413 | -0.08888 |
| C | -2.04563 | -1.77445 | -0.92831 |
| C | -2.15591 | -2.42557 | -2.17843 |
| C | -2.28649 | -2.49279 | 0.26102  |
| C | -2.46690 | -3.78040 | -2.18369 |
| C | -2.58206 | -3.84674 | 0.18630  |
| C | -2.66820 | -4.51531 | -1.02459 |
| H | -2.55361 | -4.27908 | -3.14378 |
| H | -2.75551 | -4.39034 | 1.10994  |
| C | 2.85096  | 1.78461  | 2.89615  |
| H | 2.59312  | 2.68139  | 2.32443  |
| H | 1.94781  | 1.49561  | 3.44139  |
| H | 3.61261  | 2.06065  | 3.62687  |
| C | 2.12181  | -2.19530 | -0.20073 |
| H | 1.26126  | -2.48672 | 0.40762  |
| H | 1.73259  | -1.79505 | -1.13818 |
| H | 2.69045  | -3.09742 | -0.43160 |
| C | 6.73205  | -0.77569 | 1.07114  |
| H | 7.24611  | -0.38881 | 1.95266  |
| H | 6.98143  | -1.83306 | 0.96235  |
| H | 7.13886  | -0.25398 | 0.19899  |
| C | -2.29516 | -1.87223 | 1.62848  |
| H | -2.05968 | -2.62438 | 2.38229  |
| H | -1.57150 | -1.06522 | 1.75558  |
| H | -3.28873 | -1.48000 | 1.86670  |
| C | -1.98279 | -1.77018 | -3.51887 |
| H | -2.62132 | -0.89539 | -3.63893 |
| H | -0.95777 | -1.43462 | -3.67978 |
| H | -2.23259 | -2.48574 | -4.30239 |
| C | -2.95248 | -5.98304 | -1.08168 |
| H | -3.51719 | -6.24452 | -1.97814 |
| H | -2.01805 | -6.55229 | -1.10720 |
| H | -3.51504 | -6.31552 | -0.20797 |

**R = Mes\***

|    |          |          |          |
|----|----------|----------|----------|
| P  | 0.69548  | 0.30887  | 1.03399  |
| C  | 0.42064  | 0.04818  | -0.68126 |
| P  | -1.14090 | -0.11502 | -1.60902 |
| O  | -0.40206 | -0.00921 | -2.99495 |
| Cl | 2.55122  | -0.81734 | -3.24373 |
| Au | 0.70342  | 2.22329  | -0.54862 |
| Cl | 0.73816  | 4.50505  | -0.31847 |
| C  | 2.52143  | 0.08518  | 1.21392  |
| C  | 3.17739  | -1.09024 | 0.75286  |
| C  | 3.32209  | 1.16717  | 1.66389  |
| C  | 4.51653  | -0.99728 | 0.40587  |
| C  | 4.66208  | 1.18760  | 1.27298  |
| C  | 5.26346  | 0.16340  | 0.56522  |
| H  | 5.00741  | -1.87859 | 0.01319  |
| H  | 5.25543  | 2.04644  | 1.55177  |
| C  | 2.94133  | 2.25047  | 2.69828  |
| C  | 2.62373  | -2.52768 | 0.84781  |
| C  | 6.69432  | 0.23534  | 0.04525  |
| C  | 3.78369  | 1.92518  | 3.94868  |
| H  | 3.54275  | 0.93149  | 4.33581  |
| H  | 4.85408  | 1.95343  | 3.74024  |
| H  | 3.57111  | 2.65808  | 4.73210  |
| C  | 3.29732  | 3.66210  | 2.22171  |
| H  | 2.73529  | 3.93918  | 1.32953  |
| H  | 3.04774  | 4.38084  | 3.00733  |
| H  | 4.36163  | 3.77380  | 2.00877  |

|   |          |          |          |
|---|----------|----------|----------|
| C | 1.48920  | 2.26585  | 3.16749  |
| H | 1.41014  | 2.95216  | 4.01546  |
| H | 0.80146  | 2.62483  | 2.40209  |
| H | 1.15674  | 1.28422  | 3.51470  |
| C | 2.91386  | -3.34622 | -0.41372 |
| H | 2.51108  | -2.86182 | -1.30208 |
| H | 3.98281  | -3.49774 | -0.57111 |
| H | 2.46021  | -4.33712 | -0.32118 |
| C | 3.37119  | -3.17349 | 2.03138  |
| H | 4.45096  | -3.16830 | 1.87568  |
| H | 3.16433  | -2.63922 | 2.96219  |
| H | 3.04752  | -4.21164 | 2.15282  |
| C | 1.13857  | -2.66112 | 1.16739  |
| H | 0.85123  | -2.07789 | 2.04792  |
| H | 0.50362  | -2.37224 | 0.33228  |
| H | 0.92372  | -3.70913 | 1.39624  |
| C | 7.34250  | 1.58915  | 0.32185  |
| H | 6.77623  | 2.40798  | -0.12848 |
| H | 7.43883  | 1.78493  | 1.39300  |
| H | 8.34796  | 1.60607  | -0.10576 |
| C | 6.67619  | 0.01009  | -1.47152 |
| H | 7.69403  | 0.04654  | -1.87037 |
| H | 6.24668  | -0.95985 | -1.73015 |
| H | 6.08375  | 0.77829  | -1.97378 |
| C | 7.54753  | -0.85146 | 0.70961  |
| H | 7.57130  | -0.72186 | 1.79457  |
| H | 7.16752  | -1.85309 | 0.49846  |
| H | 8.57500  | -0.80174 | 0.33813  |
| C | -2.36034 | -1.48995 | -1.68529 |
| C | -2.35803 | -2.33509 | -2.83554 |
| C | -3.57682 | -1.34904 | -0.96221 |
| C | -3.58609 | -2.65493 | -3.39850 |
| C | -1.13976 | -3.05978 | -3.43831 |
| C | -4.76118 | -1.74278 | -1.57643 |
| C | -3.71788 | -0.96127 | 0.52138  |
| C | -4.80693 | -2.30393 | -2.84107 |
| H | -3.58218 | -3.23290 | -4.31297 |
| C | -0.71171 | -2.47968 | -4.78982 |
| C | -1.52867 | -4.53357 | -3.67821 |
| C | 0.01813  | -3.12121 | -2.45107 |
| H | -5.68420 | -1.60332 | -1.03163 |
| C | -2.41025 | -0.58368 | 1.19428  |
| C | -4.21021 | -2.23378 | 1.23933  |
| C | -4.74576 | 0.15057  | 0.75546  |
| C | -6.10766 | -2.62137 | -3.56747 |
| H | 0.09141  | -3.09051 | -5.21064 |
| H | -1.54758 | -2.49695 | -5.49450 |
| H | -0.35569 | -1.45724 | -4.70480 |
| H | -2.22516 | -4.66468 | -4.50717 |
| H | -0.62417 | -5.09225 | -3.93122 |
| H | -1.96673 | -4.98476 | -2.78482 |
| H | 0.40721  | -2.14939 | -2.16249 |
| H | -0.28081 | -3.65729 | -1.54676 |
| H | 0.85263  | -3.66251 | -2.90134 |
| H | -1.64375 | -1.34481 | 1.03883  |
| H | -2.01386 | 0.38175  | 0.87997  |
| H | -2.56270 | -0.49834 | 2.27261  |
| H | -4.30605 | -2.03273 | 2.30979  |
| H | -5.18072 | -2.56644 | 0.86934  |
| H | -3.49962 | -3.05331 | 1.10900  |
| H | -5.74156 | -0.12627 | 0.40608  |
| H | -4.82109 | 0.35568  | 1.82629  |
| H | -4.46978 | 1.08215  | 0.25889  |
| C | -7.33320 | -2.14058 | -2.79507 |
| C | -6.22764 | -4.13659 | -3.77091 |
| C | -6.09339 | -1.92508 | -4.93357 |



|    |          |          |          |
|----|----------|----------|----------|
| H  | -7.43822 | -2.65162 | -1.83460 |
| H  | -7.30071 | -1.06360 | -2.61187 |
| H  | -8.23457 | -2.35038 | -3.37541 |
| H  | -5.40405 | -4.53368 | -4.36734 |
| H  | -6.23261 | -4.66165 | -2.81260 |
| H  | -7.15970 | -4.37124 | -4.29201 |
| H  | -6.02356 | -0.84051 | -4.82029 |
| H  | -5.25145 | -2.25264 | -5.54652 |
| H  | -7.01322 | -2.15136 | -5.47936 |
| Si | 1.20264  | 0.57748  | -2.42095 |
| C  | -2.23250 | 1.32893  | -1.62105 |
| H  | -2.69199 | 1.53764  | -0.65973 |
| H  | -1.63108 | 2.18764  | -1.92554 |
| H  | -3.00931 | 1.14599  | -2.36611 |

**[R-P=C(Si(II)Cl)-P(S)ClR](AuCl)**

**Coordination through Si(II) atom**

**R= H**

|    |          |          |          |
|----|----------|----------|----------|
| P  | 0.80758  | 0.23345  | 0.90815  |
| C  | 0.45042  | -0.22531 | -0.64820 |
| P  | -1.12771 | -0.40431 | -1.37393 |
| Cl | 1.62019  | -2.36199 | -2.58764 |
| Si | 1.44177  | -0.30935 | -2.29543 |
| H  | 2.22214  | 0.31452  | 0.72733  |
| H  | -1.62238 | -1.71540 | -1.25451 |
| Cl | -2.62195 | 0.62927  | -0.53398 |
| Au | 3.10492  | 1.10808  | -2.77799 |
| Cl | 4.80924  | 2.57396  | -3.19624 |
| S  | -0.66480 | 0.10217  | -3.24505 |

**R = Me**

|    |          |          |          |
|----|----------|----------|----------|
| P  | 0.76179  | -0.00067 | 0.91748  |
| C  | 0.41357  | -0.26170 | -0.68802 |
| P  | -1.17846 | -0.31583 | -1.40131 |
| Cl | 1.61948  | -2.32676 | -2.70947 |
| Si | 1.38539  | -0.28213 | -2.34017 |
| Cl | -2.51488 | 0.95595  | -0.59090 |
| Au | 3.07791  | 1.13023  | -2.76865 |
| Cl | 4.81971  | 2.57944  | -3.10920 |
| C  | 2.58477  | -0.03790 | 0.97993  |
| H  | 2.90913  | -1.07902 | 1.07861  |
| H  | 3.03866  | 0.38429  | 0.07887  |
| H  | 2.92410  | 0.50684  | 1.86197  |
| C  | -1.98001 | -1.91411 | -1.25799 |
| H  | -2.19869 | -2.11728 | -0.20825 |
| H  | -2.90133 | -1.91045 | -1.84215 |
| H  | -1.28757 | -2.65984 | -1.65389 |
| S  | -0.67388 | 0.15939  | -3.28631 |

**R = t-Bu**

|    |          |          |          |
|----|----------|----------|----------|
| P  | 0.70253  | 0.01502  | 0.69331  |
| C  | 0.51903  | -0.38683 | -0.91433 |
| P  | -1.08418 | -0.50519 | -1.63609 |
| Cl | 2.08596  | -2.51099 | -2.69844 |
| Si | 1.52121  | -0.50793 | -2.55007 |
| Au | 2.95680  | 1.10034  | -3.19461 |
| Cl | 4.41786  | 2.77569  | -3.76863 |
| C  | 2.51001  | 0.16017  | 1.10250  |
| C  | 3.43605  | -0.76292 | 0.32686  |
| C  | 2.85896  | 1.63254  | 0.84697  |
| C  | 2.59877  | -0.13831 | 2.60235  |
| H  | 3.13240  | -1.80938 | 0.39795  |
| H  | 3.49675  | -0.48859 | -0.72828 |
| H  | 4.44928  | -0.67825 | 0.73317  |
| H  | 2.18364  | 2.31405  | 1.37325  |

|    |          |          |          |
|----|----------|----------|----------|
| H  | 3.87128  | 1.82475  | 1.21706  |
| H  | 2.83947  | 1.87465  | -0.21782 |
| H  | 3.61979  | 0.04948  | 2.94681  |
| H  | 1.92629  | 0.49588  | 3.18628  |
| H  | 2.35892  | -1.18186 | 2.82354  |
| C  | -2.12741 | -1.95376 | -1.15703 |
| C  | -3.36068 | -1.96868 | -2.05785 |
| C  | -1.28503 | -3.20833 | -1.38763 |
| C  | -2.52237 | -1.83850 | 0.31264  |
| H  | -3.99161 | -1.09180 | -1.90477 |
| H  | -3.08959 | -2.02804 | -3.11419 |
| H  | -3.95203 | -2.85568 | -1.81545 |
| H  | -0.39017 | -3.22279 | -0.76370 |
| H  | -1.89522 | -4.07752 | -1.12785 |
| H  | -0.97571 | -3.30869 | -2.42874 |
| H  | -3.08919 | -2.73323 | 0.58430  |
| H  | -1.65103 | -1.78594 | 0.96921  |
| H  | -3.15258 | -0.96916 | 0.50262  |
| Cl | -2.23617 | 1.10243  | -1.20304 |
| S  | -0.53870 | -0.50535 | -3.57266 |

**R = Ph**

|    |          |          |          |
|----|----------|----------|----------|
| P  | 0.83732  | -0.27336 | 0.43446  |
| C  | 0.47692  | -0.23906 | -1.19781 |
| P  | -1.19827 | -0.36769 | -1.70291 |
| Cl | 1.98099  | -2.21196 | -3.10287 |
| Si | 1.25955  | -0.25932 | -2.94443 |
| Au | 2.47978  | 1.41744  | -3.81620 |
| Cl | 3.75887  | 3.13439  | -4.64503 |
| C  | -2.13270 | -1.74526 | -1.02609 |
| C  | -1.80242 | -3.01518 | -1.50175 |
| C  | -3.09101 | -1.59450 | -0.02783 |
| C  | -2.43712 | -4.12729 | -0.97739 |
| H  | -1.05470 | -3.12973 | -2.27890 |
| C  | -3.72021 | -2.71568 | 0.48925  |
| H  | -3.34973 | -0.61044 | 0.34088  |
| C  | -3.39537 | -3.97811 | 0.01602  |
| H  | -2.18467 | -5.11300 | -1.34946 |
| H  | -4.46990 | -2.59937 | 1.26279  |
| H  | -3.89352 | -4.85133 | 0.42122  |
| C  | 2.61112  | -0.19034 | 0.64956  |
| C  | 3.03610  | -0.48469 | 1.95274  |
| C  | 3.56172  | 0.16496  | -0.31381 |
| C  | 4.38117  | -0.45507 | 2.27705  |
| H  | 2.30084  | -0.74023 | 2.70967  |
| C  | 4.90165  | 0.20866  | 0.01853  |
| H  | 3.25932  | 0.43741  | -1.31963 |
| C  | 5.31269  | -0.10834 | 1.30910  |
| H  | 4.70221  | -0.69337 | 3.28414  |
| H  | 5.62901  | 0.49551  | -0.73166 |
| H  | 6.36659  | -0.07536 | 1.56125  |
| Cl | -2.26908 | 1.27079  | -1.20354 |
| S  | -0.90406 | -0.48310 | -3.68576 |

**R = Mes**

|    |          |          |          |
|----|----------|----------|----------|
| P  | -0.41725 | 1.47157  | 1.44297  |
| C  | 0.14893  | 0.40405  | 0.28083  |
| P  | 1.76859  | -0.27762 | 0.07630  |
| Cl | -1.20971 | 0.76900  | -2.62306 |
| C  | 3.46693  | 0.39792  | 0.16124  |
| C  | 4.09194  | 0.72275  | -1.08042 |
| C  | 4.29397  | 0.11910  | 1.28266  |
| C  | 5.41001  | 0.32717  | -1.24719 |
| C  | 5.61329  | -0.24177 | 1.03208  |
| C  | 6.16692  | -0.25676 | -0.23851 |
| H  | 5.87436  | 0.51136  | -2.20793 |

|   |          |          |          |                 |          |          |          |
|---|----------|----------|----------|-----------------|----------|----------|----------|
| H | 6.23155  | -0.51086 | 1.87706  | H               | 2.17080  | 2.70168  | -0.81892 |
| C | -2.21104 | 1.52784  | 1.09096  | C               | 3.49722  | 1.04816  | -3.55693 |
| C | -2.73555 | 2.57944  | 0.30413  | H               | 2.77620  | 0.23395  | -3.61463 |
| C | -3.06373 | 0.48274  | 1.53491  | H               | 3.20790  | 1.80888  | -4.28655 |
| C | -3.99723 | 2.39924  | -0.25677 | H               | 4.47443  | 0.66182  | -3.85413 |
| C | -4.30329 | 0.36775  | 0.92095  | C               | 4.50986  | 2.86688  | -2.19029 |
| C | -4.76384 | 1.26656  | -0.03268 | H               | 4.58759  | 3.33614  | -1.20647 |
| H | -4.38834 | 3.16634  | -0.90559 | H               | 5.51267  | 2.58090  | -2.50872 |
| H | -4.93404 | -0.46666 | 1.18871  | H               | 4.13497  | 3.61406  | -2.89456 |
| C | -2.04088 | 3.94656  | 0.14673  | C               | 8.22288  | -1.39357 | 0.70376  |
| C | -2.79727 | -0.35998 | 2.79849  | H               | 8.38471  | -0.65536 | 1.49343  |
| C | -6.08240 | 1.00234  | -0.75020 | H               | 7.62689  | -2.21312 | 1.11283  |
| C | 3.94630  | 0.38968  | 2.76032  | H               | 9.20036  | -1.79841 | 0.43216  |
| C | 3.53244  | 1.67149  | -2.16027 | C               | 8.45420  | 0.36977  | -1.02800 |
| C | 7.56759  | -0.77795 | -0.52958 | H               | 8.06860  | 0.81300  | -1.94818 |
| C | -3.82441 | -1.48231 | 2.97404  | H               | 8.53080  | 1.16118  | -0.27840 |
| H | -3.57785 | -2.04430 | 3.87780  | H               | 9.46164  | -0.00068 | -1.23525 |
| H | -4.83674 | -1.09540 | 3.10723  | C               | 7.47226  | -1.85598 | -1.61635 |
| H | -3.82126 | -2.18196 | 2.13436  | H               | 6.85461  | -2.69384 | -1.28461 |
| C | -2.94270 | 0.60195  | 3.98999  | H               | 7.03776  | -1.46431 | -2.53818 |
| H | -2.19369 | 1.39820  | 3.95604  | H               | 8.46873  | -2.23912 | -1.85149 |
| H | -3.92996 | 1.06946  | 3.99673  | Au              | -2.17665 | -2.25447 | -0.73624 |
| H | -2.81551 | 0.05570  | 4.92921  | Cl              | -3.75426 | -3.88037 | -0.27157 |
| C | -1.41982 | -1.01196 | 2.88132  | Si              | -0.70127 | -0.59297 | -1.11871 |
| H | -1.19876 | -1.62316 | 2.00510  | Cl              | 1.87381  | -1.86933 | 1.35852  |
| H | -0.61241 | -0.27983 | 3.00739  | S               | 1.42942  | -1.15707 | -1.71271 |
| H | -1.38145 | -1.65078 | 3.76796  |                 |          |          |          |
| C | -7.21671 | 0.86335  | 0.27187  |                 |          |          |          |
| H | -8.16200 | 0.67454  | -0.24421 | <b>R = Mes*</b> |          |          |          |
| H | -7.04601 | 0.03318  | 0.95945  | P               | -0.41725 | 1.47157  | 1.44297  |
| H | -7.32797 | 1.77633  | 0.86289  | C               | 0.14893  | 0.40405  | 0.28083  |
| C | -6.44858 | 2.12261  | -1.72009 | P               | 1.76859  | -0.27762 | 0.07630  |
| H | -7.38641 | 1.87448  | -2.22266 | Cl              | -1.20971 | 0.76900  | -2.62306 |
| H | -6.59268 | 3.07809  | -1.20797 | C               | 3.46693  | 0.39792  | 0.16124  |
| H | -5.68661 | 2.25501  | -2.49226 | C               | 4.09194  | 0.72275  | -1.08042 |
| C | -5.94909 | -0.30356 | -1.54441 | C               | 4.29397  | 0.11910  | 1.28266  |
| H | -5.15600 | -0.22547 | -2.29194 | C               | 5.41001  | 0.32717  | -1.24719 |
| H | -5.71076 | -1.15425 | -0.90303 | C               | 5.61329  | -0.24177 | 1.03208  |
| H | -6.88692 | -0.52317 | -2.06268 | C               | 6.16692  | -0.25676 | -0.23851 |
| C | -2.89390 | 4.93397  | -0.65324 | H               | 5.87436  | 0.51136  | -2.20793 |
| H | -3.87309 | 5.09599  | -0.19795 | H               | 6.23155  | -0.51086 | 1.87706  |
| H | -2.38072 | 5.89801  | -0.68090 | C               | -2.21104 | 1.52784  | 1.09096  |
| H | -3.03902 | 4.60911  | -1.68621 | C               | -2.73555 | 2.57944  | 0.30413  |
| C | -1.84998 | 4.54861  | 1.54658  | C               | -3.06373 | 0.48274  | 1.53491  |
| H | -2.80825 | 4.64670  | 2.06175  | C               | -3.99723 | 2.39924  | -0.25677 |
| H | -1.19461 | 3.93656  | 2.17141  | C               | -4.30329 | 0.36775  | 0.92095  |
| H | -1.39857 | 5.54199  | 1.46939  | C               | -4.76384 | 1.26656  | -0.03268 |
| C | -0.68634 | 3.87222  | -0.55726 | H               | -4.38834 | 3.16634  | -0.90559 |
| H | 0.06780  | 3.35602  | 0.04417  | H               | -4.93404 | -0.46666 | 1.18871  |
| H | -0.75645 | 3.35629  | -1.51536 | C               | -2.04088 | 3.94656  | 0.14673  |
| H | -0.30518 | 4.88348  | -0.72777 | C               | -2.79727 | -0.35998 | 2.79849  |
| C | 2.54176  | 0.92968  | 2.99001  | C               | -6.08240 | 1.00234  | -0.75020 |
| H | 2.32565  | 1.77690  | 2.33536  | C               | 3.94630  | 0.38968  | 2.76032  |
| H | 1.76577  | 0.17702  | 2.86542  | C               | 3.53244  | 1.67149  | -2.16027 |
| H | 2.45886  | 1.29140  | 4.01776  | C               | 7.56759  | -0.77795 | -0.52958 |
| C | 4.90015  | 1.52659  | 3.18774  | C               | -3.82441 | -1.48231 | 2.97404  |
| H | 4.67966  | 1.80975  | 4.22037  | H               | -3.57785 | -2.04430 | 3.87780  |
| H | 5.94803  | 1.22986  | 3.13619  | H               | -4.83674 | -1.09540 | 3.10723  |
| H | 4.76636  | 2.40872  | 2.55701  | H               | -3.82126 | -2.18196 | 2.13436  |
| C | 4.19524  | -0.81136 | 3.67576  | C               | -2.94270 | 0.60195  | 3.98999  |
| H | 5.22186  | -1.17488 | 3.60378  | H               | -2.19369 | 1.39820  | 3.95604  |
| H | 4.02540  | -0.51566 | 4.71429  | H               | -3.92996 | 1.06946  | 3.99673  |
| H | 3.52641  | -1.64035 | 3.44809  | H               | -2.81551 | 0.05570  | 4.92921  |
| C | 2.17291  | 2.26896  | -1.82225 | C               | -1.41982 | -1.01196 | 2.88132  |
| H | 1.95521  | 3.07604  | -2.52606 | H               | -1.19876 | -1.62316 | 2.00510  |
| H | 1.35287  | 1.56064  | -1.90763 | H               | -0.61241 | -0.27983 | 3.00739  |
|   |          |          |          | H               | -1.38145 | -1.65078 | 3.76796  |

|    |          |          |          |
|----|----------|----------|----------|
| C  | -7.21671 | 0.86335  | 0.27187  |
| H  | -8.16200 | 0.67454  | -0.24421 |
| H  | -7.04601 | 0.03318  | 0.95945  |
| H  | -7.32797 | 1.77633  | 0.86289  |
| C  | -6.44858 | 2.12261  | -1.72009 |
| H  | -7.38641 | 1.87448  | -2.22266 |
| H  | -6.59268 | 3.07809  | -1.20797 |
| H  | -5.68661 | 2.25501  | -2.49226 |
| C  | -5.94909 | -0.30356 | -1.54441 |
| H  | -5.15600 | -0.22547 | -2.29194 |
| H  | -5.71076 | -1.15425 | -0.90303 |
| H  | -6.88692 | -0.52317 | -2.06268 |
| C  | -2.89390 | 4.93397  | -0.65324 |
| H  | -3.87309 | 5.09599  | -0.19795 |
| H  | -2.38072 | 5.89801  | -0.68090 |
| H  | -3.03902 | 4.60911  | -1.68621 |
| C  | -1.84998 | 4.54861  | 1.54658  |
| H  | -2.80825 | 4.64670  | 2.06175  |
| H  | -1.19461 | 3.93656  | 2.17141  |
| H  | -1.39857 | 5.54199  | 1.46939  |
| C  | -0.68634 | 3.87222  | -0.55726 |
| H  | 0.06780  | 3.35602  | 0.04417  |
| H  | -0.75645 | 3.35629  | -1.51536 |
| H  | -0.30518 | 4.88348  | -0.72777 |
| C  | 2.54176  | 0.92968  | 2.99001  |
| H  | 2.32565  | 1.77690  | 2.33536  |
| H  | 1.76577  | 0.17702  | 2.86542  |
| H  | 2.45886  | 1.29140  | 4.01776  |
| C  | 4.90015  | 1.52659  | 3.18774  |
| H  | 4.67966  | 1.80975  | 4.22037  |
| H  | 5.94803  | 1.22986  | 3.13619  |
| H  | 4.76636  | 2.40872  | 2.55701  |
| C  | 4.19524  | -0.81136 | 3.67576  |
| H  | 5.22186  | -1.17488 | 3.60378  |
| H  | 4.02540  | -0.51566 | 4.71429  |
| H  | 3.52641  | -1.64035 | 3.44809  |
| C  | 2.17291  | 2.26896  | -1.82225 |
| H  | 1.95521  | 3.07604  | -2.52606 |
| H  | 1.35287  | 1.56064  | -1.90763 |
| H  | 2.17080  | 2.70168  | -0.81892 |
| C  | 3.49722  | 1.04816  | -3.55693 |
| H  | 2.77620  | 0.23395  | -3.61463 |
| H  | 3.20790  | 1.80888  | -4.28655 |
| H  | 4.47443  | 0.66182  | -3.85413 |
| C  | 4.50986  | 2.86688  | -2.19029 |
| H  | 4.58759  | 3.33614  | -1.20647 |
| H  | 5.51267  | 2.58090  | -2.50872 |
| H  | 4.13497  | 3.61406  | -2.89456 |
| C  | 8.22288  | -1.39357 | 0.70376  |
| H  | 8.38471  | -0.65536 | 1.49343  |
| H  | 7.62689  | -2.21312 | 1.11283  |
| H  | 9.20036  | -1.79841 | 0.43216  |
| C  | 8.45420  | 0.36977  | -1.02800 |
| H  | 8.06860  | 0.81300  | -1.94818 |
| H  | 8.53080  | 1.16118  | -0.27840 |
| H  | 9.46164  | -0.00068 | -1.23525 |
| C  | 7.47226  | -1.85598 | -1.61635 |
| H  | 6.85461  | -2.69384 | -1.28461 |
| H  | 7.03776  | -1.46431 | -2.53818 |
| H  | 8.46873  | -2.23912 | -1.85149 |
| Au | -2.17665 | -2.25447 | -0.73624 |
| Cl | -3.75426 | -3.88037 | -0.27157 |
| Si | -0.70127 | -0.59297 | -1.11871 |
| Cl | 1.87381  | -1.86933 | 1.35852  |
| S  | 1.42942  | -1.15707 | -1.71271 |

### Coordination through S atom

#### R= H

|    |          |          |          |
|----|----------|----------|----------|
| P  | 0.67279  | -0.20066 | 1.16497  |
| C  | 0.44800  | -0.32977 | -0.47563 |
| P  | -0.97740 | 0.06193  | -1.38101 |
| Cl | 0.89512  | -2.50126 | -2.61514 |
| Si | 1.67535  | -0.63102 | -1.99615 |
| H  | 2.03934  | -0.62646 | 1.17921  |
| H  | -1.66032 | -1.10827 | -1.73748 |
| Cl | -2.42535 | 1.14322  | -0.50417 |
| Au | -1.41067 | 0.36058  | -4.75462 |
| Cl | -2.72939 | -0.12431 | -6.50973 |
| S  | -0.08309 | 0.90064  | -2.99328 |

#### R = Me

|    |          |          |          |
|----|----------|----------|----------|
| P  | 0.67681  | -0.17002 | 1.11235  |
| C  | 0.43945  | -0.22874 | -0.53344 |
| P  | -1.05513 | 0.07553  | -1.35406 |
| Cl | 1.30900  | -2.31252 | -2.69608 |
| Si | 1.66345  | -0.31404 | -2.07018 |
| Cl | -2.34625 | 1.33202  | -0.42956 |
| Au | -1.49810 | 0.07268  | -4.80994 |
| Cl | -2.72340 | -0.67168 | -6.54508 |
| C  | 2.42455  | -0.68402 | 1.29728  |
| H  | 2.82669  | -0.27656 | 2.22602  |
| H  | 2.46464  | -1.77572 | 1.36227  |
| H  | 3.04089  | -0.36718 | 0.45106  |
| C  | -2.01837 | -1.40834 | -1.62766 |
| H  | -2.87639 | -1.16796 | -2.25691 |
| H  | -1.37537 | -2.13596 | -2.12650 |
| H  | -2.34656 | -1.78662 | -0.65728 |
| S  | -0.27412 | 0.86586  | -3.06640 |

#### R = t-Bu

|    |          |          |          |
|----|----------|----------|----------|
| P  | 0.78161  | -0.09987 | 0.84218  |
| C  | 0.42111  | 0.03957  | -0.78366 |
| P  | -1.25226 | 0.00881  | -1.30077 |
| Cl | 1.81579  | -1.40873 | -3.20475 |
| Si | 1.34141  | 0.52221  | -2.45440 |
| Au | -1.98668 | -0.36572 | -4.83254 |
| Cl | -2.94074 | -1.46573 | -6.55261 |
| C  | 2.62686  | -0.29410 | 1.04022  |
| C  | 2.88745  | -1.80353 | 0.98024  |
| C  | 3.47713  | 0.43658  | 0.01555  |
| C  | 2.93569  | 0.22659  | 2.44673  |
| H  | 2.27013  | -2.35600 | 1.69505  |
| H  | 2.70104  | -2.20134 | -0.01945 |
| H  | 3.93486  | -1.99703 | 1.23592  |
| H  | 3.23461  | 1.49964  | -0.04409 |
| H  | 4.53368  | 0.35111  | 0.29259  |
| H  | 3.38302  | 0.00184  | -0.98342 |
| H  | 3.98456  | 0.03002  | 2.68755  |
| H  | 2.77053  | 1.30437  | 2.52408  |
| H  | 2.31968  | -0.26333 | 3.20552  |
| C  | -2.10952 | -1.63902 | -1.20615 |
| C  | -3.51915 | -1.50612 | -1.77707 |
| C  | -1.29251 | -2.65637 | -1.99784 |
| C  | -2.17553 | -2.04922 | 0.26468  |
| H  | -4.13064 | -0.80724 | -1.20501 |
| H  | -3.51291 | -1.20018 | -2.82572 |
| H  | -3.99298 | -2.48997 | -1.72768 |
| H  | -0.27826 | -2.76147 | -1.61088 |
| H  | -1.79433 | -3.62403 | -1.91335 |
| H  | -1.23296 | -2.40438 | -3.05782 |
| H  | -2.66229 | -3.02722 | 0.30903  |

|    |          |          |          |
|----|----------|----------|----------|
| H  | -1.18573 | -2.15118 | 0.71302  |
| H  | -2.76226 | -1.35336 | 0.86522  |
| Cl | -2.44016 | 1.24239  | -0.20299 |
| S  | -1.00208 | 0.82655  | -3.16346 |

**R = Ph**

|    |          |          |          |
|----|----------|----------|----------|
| P  | 0.85225  | -0.27979 | 1.22111  |
| C  | 0.36695  | -0.21146 | -0.37789 |
| P  | -1.28921 | -0.09879 | -0.86570 |
| Cl | 1.27007  | -1.52022 | -3.12529 |
| Si | 1.27005  | 0.31014  | -2.04052 |
| Au | -2.36719 | 0.41508  | -4.19131 |
| Cl | -3.72758 | -0.20641 | -5.87957 |
| C  | 2.63978  | -0.43882 | 1.13873  |
| C  | 3.34599  | 0.03149  | 2.25277  |
| C  | 3.35044  | -0.98484 | 0.06341  |
| C  | 4.72895  | -0.00010 | 2.27166  |
| H  | 2.80118  | 0.43623  | 3.10016  |
| C  | 4.73443  | -1.02235 | 0.09054  |
| H  | 2.82161  | -1.42996 | -0.77249 |
| C  | 5.42277  | -0.52346 | 1.18811  |
| H  | 5.26809  | 0.37814  | 3.13225  |
| H  | 5.27716  | -1.44914 | -0.74470 |
| H  | 6.50619  | -0.55554 | 1.20533  |
| C  | -2.04951 | -1.67929 | -1.21337 |
| C  | -3.37615 | -1.72835 | -1.64171 |
| C  | -1.30395 | -2.84597 | -1.07485 |
| C  | -3.95044 | -2.95082 | -1.93373 |
| H  | -3.95620 | -0.81970 | -1.75310 |
| C  | -1.89329 | -4.06656 | -1.36521 |
| H  | -0.27097 | -2.79890 | -0.75616 |
| C  | -3.20958 | -4.11811 | -1.79547 |
| H  | -4.97578 | -2.99113 | -2.28019 |
| H  | -1.31551 | -4.97730 | -1.26325 |
| H  | -3.66339 | -5.07388 | -2.03069 |
| Cl | -2.54553 | 0.78024  | 0.46627  |
| S  | -1.02738 | 1.11655  | -2.49466 |

**R = Mes**

|    |          |          |          |
|----|----------|----------|----------|
| P  | 0.71571  | 0.24598  | 1.25883  |
| C  | 0.38582  | -0.18340 | -0.30738 |
| P  | -1.06333 | -0.05692 | -1.25537 |
| Au | -1.83996 | 1.49155  | -4.39522 |
| Cl | -3.36242 | 2.23507  | -5.88403 |
| C  | 2.52759  | -0.05626 | 1.31607  |
| C  | 3.03894  | -1.35898 | 1.45599  |
| C  | 3.39855  | 1.04772  | 1.28068  |
| C  | 4.41894  | -1.52917 | 1.50600  |
| C  | 4.76808  | 0.82498  | 1.33404  |
| C  | 5.29915  | -0.45637 | 1.43717  |
| H  | 4.81535  | -2.53406 | 1.61621  |
| H  | 5.43951  | 1.67810  | 1.30320  |
| C  | -1.94944 | -1.63783 | -1.33403 |
| C  | -2.53423 | -2.10152 | -0.13079 |
| C  | -2.02023 | -2.43459 | -2.50241 |
| C  | -3.16530 | -3.33831 | -0.12618 |
| C  | -2.67817 | -3.65542 | -2.42220 |
| C  | -3.25851 | -4.13066 | -1.25726 |
| H  | -3.60151 | -3.68686 | 0.80463  |
| H  | -2.72780 | -4.26241 | -3.32007 |
| C  | 2.87060  | 2.44863  | 1.17520  |
| H  | 2.42502  | 2.64383  | 0.19459  |
| H  | 2.09006  | 2.64112  | 1.91778  |
| H  | 3.66712  | 3.17750  | 1.32803  |
| C  | 2.13963  | -2.55425 | 1.57062  |

|    |          |          |          |
|----|----------|----------|----------|
| H  | 1.30224  | -2.36219 | 2.24745  |
| H  | 1.71563  | -2.83403 | 0.60181  |
| H  | 2.69271  | -3.41350 | 1.95155  |
| C  | 6.78054  | -0.67369 | 1.46574  |
| H  | 7.17487  | -0.78262 | 0.45059  |
| H  | 7.29791  | 0.16890  | 1.92768  |
| H  | 7.03934  | -1.58044 | 2.01466  |
| C  | -2.56572 | -1.35020 | 1.16785  |
| H  | -1.65734 | -0.78716 | 1.37847  |
| H  | -3.39419 | -0.63857 | 1.18515  |
| H  | -2.71338 | -2.05196 | 1.98946  |
| C  | -1.44592 | -2.08892 | -3.84203 |
| H  | -1.90244 | -1.19230 | -4.26517 |
| H  | -0.36975 | -1.92511 | -3.79598 |
| H  | -1.62721 | -2.91180 | -4.53291 |
| C  | -3.97383 | -5.44384 | -1.23278 |
| H  | -4.07905 | -5.82296 | -0.21544 |
| H  | -4.97839 | -5.33997 | -1.65423 |
| H  | -3.44835 | -6.19198 | -1.82939 |
| S  | -0.25854 | 0.79151  | -2.91487 |
| Si | 1.87903  | -0.32707 | -1.53754 |
| Cl | 1.70243  | -2.44842 | -1.17108 |
| Cl | -2.42924 | 1.29469  | -0.57050 |

**R = Mes\***

|   |          |          |          |
|---|----------|----------|----------|
| P | -2.09743 | 1.77458  | 0.43722  |
| C | -1.13484 | 0.42349  | 0.24066  |
| P | 0.61545  | 0.33811  | 0.30741  |
| C | -3.78386 | 1.04855  | 0.38371  |
| C | -4.57682 | 1.25388  | -0.78090 |
| C | -4.25147 | 0.18768  | 1.40014  |
| C | -5.65247 | 0.40760  | -0.98784 |
| C | -5.33655 | -0.64216 | 1.10541  |
| C | -6.01282 | -0.59999 | -0.09652 |
| H | -6.23672 | 0.52113  | -1.88893 |
| H | -5.66683 | -1.33423 | 1.86715  |
| C | -3.82863 | 0.19516  | 2.88495  |
| C | -4.33573 | 2.40049  | -1.78092 |
| C | -7.14468 | -1.55828 | -0.44888 |
| C | -3.03098 | 2.22793  | -2.56023 |
| H | -2.14967 | 2.31079  | -1.91958 |
| H | -2.98665 | 1.25422  | -3.05104 |
| H | -2.94604 | 3.01151  | -3.31902 |
| C | -4.32432 | 3.73704  | -1.02596 |
| H | -5.26838 | 3.89026  | -0.49763 |
| H | -3.51524 | 3.80017  | -0.29550 |
| H | -4.19091 | 4.56151  | -1.73197 |
| C | -5.45463 | 2.49709  | -2.82161 |
| H | -5.48593 | 1.62409  | -3.47760 |
| H | -6.43672 | 2.62445  | -2.36047 |
| H | -5.27015 | 3.37004  | -3.45185 |
| C | -3.46618 | -1.20730 | 3.38455  |
| H | -2.61841 | -1.61781 | 2.83189  |
| H | -3.19776 | -1.16140 | 4.44356  |
| H | -4.29600 | -1.90906 | 3.28826  |
| C | -2.67599 | 1.12682  | 3.24421  |
| H | -1.71224 | 0.74983  | 2.90522  |
| H | -2.82441 | 2.14223  | 2.85829  |
| H | -2.61967 | 1.21554  | 4.33301  |
| C | -5.05067 | 0.70483  | 3.67272  |
| H | -5.31986 | 1.71781  | 3.36234  |
| H | -5.92467 | 0.06839  | 3.53059  |
| H | -4.81790 | 0.72500  | 4.74104  |
| C | -7.38524 | -2.59639 | 0.64368  |
| H | -7.70092 | -2.13569 | 1.58347  |
| H | -8.18029 | -3.27705 | 0.33023  |

|    |          |          |          |
|----|----------|----------|----------|
| H  | -6.49238 | -3.19659 | 0.83533  |
| C  | -6.78100 | -2.29763 | -1.74264 |
| H  | -6.64287 | -1.60734 | -2.57716 |
| H  | -5.85414 | -2.86313 | -1.62310 |
| H  | -7.57840 | -2.99551 | -2.01286 |
| C  | -8.44277 | -0.77052 | -0.66075 |
| H  | -8.34854 | -0.04053 | -1.46722 |
| H  | -9.25670 | -1.45214 | -0.92287 |
| H  | -8.72798 | -0.23354 | 0.24743  |
| C  | 2.00259  | 1.44524  | -0.08179 |
| C  | 2.62959  | 1.24303  | -1.34871 |
| C  | 2.75778  | 2.03446  | 0.96815  |
| C  | 4.01419  | 1.22903  | -1.37093 |
| C  | 4.14206  | 1.98733  | 0.86046  |
| C  | 4.79870  | 1.47885  | -0.25063 |
| H  | 4.50445  | 1.02028  | -2.31338 |
| H  | 4.72758  | 2.37374  | 1.68326  |
| C  | 1.92891  | 1.26272  | -2.72235 |
| C  | 2.27230  | 0.05466  | -3.59622 |
| C  | 2.46671  | 2.53216  | -3.41830 |
| H  | 1.87928  | -0.87016 | -3.17582 |
| H  | 1.83279  | 0.18949  | -4.58800 |
| H  | 3.34934  | -0.06364 | -3.72714 |
| H  | 2.25008  | 3.42572  | -2.82755 |
| H  | 3.54357  | 2.48953  | -3.58376 |
| H  | 1.97961  | 2.64028  | -4.39102 |
| C  | 2.19583  | 2.90955  | 2.10583  |
| C  | 2.74925  | 4.32323  | 1.82305  |
| C  | 2.67208  | 2.48157  | 3.49598  |
| H  | 2.44318  | 4.67363  | 0.83442  |
| H  | 2.35474  | 5.01894  | 2.56856  |
| H  | 3.83789  | 4.35763  | 1.87180  |
| H  | 2.28693  | 1.50144  | 3.77409  |
| H  | 3.76080  | 2.44613  | 3.56146  |
| H  | 2.32275  | 3.20537  | 4.23702  |
| C  | 6.30709  | 1.28925  | -0.31069 |
| C  | 6.90569  | 2.26971  | -1.32703 |
| C  | 6.60506  | -0.14997 | -0.75063 |
| H  | 6.70670  | 3.30589  | -1.04141 |
| H  | 7.98910  | 2.13357  | -1.38040 |
| H  | 6.50191  | 2.11178  | -2.32928 |
| H  | 6.17589  | -0.88020 | -0.06090 |
| H  | 6.20446  | -0.36149 | -1.74403 |
| H  | 7.68625  | -0.30738 | -0.78865 |
| Cl | -2.40777 | -1.48135 | -1.91246 |
| Au | 2.62671  | -2.51453 | -0.03443 |
| Cl | 4.53021  | -3.56046 | 0.59365  |
| C  | 0.67922  | 3.05784  | 2.10241  |
| H  | 0.30660  | 3.35242  | 1.11878  |
| H  | 0.15582  | 2.15964  | 2.42390  |
| H  | 0.39753  | 3.84786  | 2.80305  |
| C  | 0.41637  | 1.43981  | -2.66377 |
| H  | -0.11938 | 0.55019  | -2.33621 |
| H  | 0.14233  | 2.27950  | -2.01999 |
| H  | 0.04991  | 1.66675  | -3.66798 |
| C  | 6.97025  | 1.52660  | 1.04344  |
| H  | 6.86368  | 2.56158  | 1.37954  |
| H  | 6.56228  | 0.86598  | 1.81218  |
| H  | 8.03984  | 1.32033  | 0.96365  |
| Si | -1.58132 | -1.49992 | 0.05765  |
| Cl | 0.99377  | -0.25214 | 2.22829  |
| S  | 0.77182  | -1.40902 | -0.75045 |

Coordination through P(sp<sup>2</sup>) atom  
R= H

|    |          |          |          |
|----|----------|----------|----------|
| P  | 0.47942  | 0.12544  | 1.07803  |
| C  | 0.28697  | -0.28316 | -0.49835 |
| P  | -1.11822 | -0.25028 | -1.51278 |
| Cl | 1.18298  | -2.74599 | -2.10429 |
| Si | 1.59238  | -0.65395 | -1.95867 |
| H  | 1.85957  | -0.06017 | 1.31774  |
| H  | -1.72137 | -1.51833 | -1.49207 |
| Cl | -2.65374 | 0.91380  | -0.93690 |
| Au | -0.90522 | 0.81178  | 2.63466  |
| Cl | -2.32013 | 1.50465  | 4.24345  |
| S  | -0.28376 | 0.20140  | -3.24904 |

R = Me

|    |          |          |          |
|----|----------|----------|----------|
| P  | 0.52275  | 0.13529  | 1.02100  |
| C  | 0.31462  | -0.23121 | -0.56519 |
| P  | -1.13965 | -0.27494 | -1.51213 |
| Cl | 1.49082  | -2.71429 | -1.98725 |
| Si | 1.59065  | -0.57051 | -2.03851 |
| Cl | -2.50143 | 1.15255  | -1.06253 |
| Au | -0.97595 | 0.71761  | 2.52423  |
| Cl | -2.51275 | 1.27341  | 4.08154  |
| C  | 2.26098  | -0.08347 | 1.46118  |
| H  | 2.37772  | -1.04930 | 1.96015  |
| H  | 2.88987  | -0.06121 | 0.56867  |
| H  | 2.55701  | 0.70010  | 2.15982  |
| C  | -2.03634 | -1.80785 | -1.26688 |
| H  | -2.86517 | -1.84904 | -1.97509 |
| H  | -1.33727 | -2.62577 | -1.45352 |
| H  | -2.41194 | -1.84743 | -0.24282 |
| S  | -0.35923 | -0.07210 | -3.33326 |

R = *t*-Bu

|    |          |          |          |
|----|----------|----------|----------|
| P  | 0.81540  | 0.07919  | 0.74493  |
| C  | 0.55418  | -0.56664 | -0.75224 |
| P  | -0.99103 | -0.65528 | -1.56904 |
| Cl | 1.97572  | -3.06895 | -2.13851 |
| Si | 1.72297  | -0.95036 | -2.31544 |
| Au | -0.67962 | 1.01940  | 2.07693  |
| Cl | -2.20695 | 1.97966  | 3.44388  |
| C  | 2.60032  | 0.05108  | 1.24105  |
| C  | 2.66850  | 0.40493  | 2.72530  |
| C  | 3.21782  | -1.32285 | 1.00024  |
| C  | 3.31114  | 1.12681  | 0.41258  |
| H  | 2.22901  | 1.38251  | 2.93533  |
| H  | 2.15845  | -0.33536 | 3.34588  |
| H  | 3.71850  | 0.43455  | 3.02983  |
| H  | 3.22237  | -1.60307 | -0.05329 |
| H  | 4.25651  | -1.30398 | 1.34441  |
| H  | 2.69552  | -2.10666 | 1.55345  |
| H  | 4.36051  | 1.16846  | 0.72095  |
| H  | 3.28253  | 0.90435  | -0.65677 |
| H  | 2.87737  | 2.11648  | 0.57578  |
| C  | -2.13721 | -2.00170 | -1.01289 |
| C  | -1.38708 | -3.32694 | -1.12387 |
| C  | -2.57433 | -1.75729 | 0.42733  |
| C  | -3.33888 | -1.99529 | -1.95685 |
| H  | -1.05793 | -3.52786 | -2.14383 |
| H  | -0.51185 | -3.36096 | -0.47383 |
| H  | -2.06911 | -4.12576 | -0.81978 |
| H  | -3.10589 | -0.81310 | 0.55073  |
| H  | -3.25235 | -2.56485 | 0.71743  |
| H  | -1.73053 | -1.77433 | 1.11966  |
| H  | -3.98454 | -2.83592 | -1.68917 |
| H  | -3.92507 | -1.07952 | -1.87025 |
| H  | -3.03649 | -2.12513 | -2.99826 |
| Cl | -2.08403 | 1.04287  | -1.34846 |

S -0.36656 -0.86186 -3.45645

**R = Ph**

P 0.74722 -0.08728 0.96545  
C 0.37310 -0.13181 -0.63997  
P -1.22778 -0.13956 -1.32609  
Cl 1.68976 -1.92976 -2.87170  
Si 1.38497 0.12412 -2.31059  
Au -0.63619 0.11516 2.67712  
Cl -2.07220 0.26264 4.41865  
C -2.02679 -1.74481 -1.20950  
C -2.65100 -2.13423 -0.02448  
C -1.95740 -2.61578 -2.29247  
C -3.20732 -3.39758 0.06784  
H -2.71114 -1.45704 0.81996  
C -2.52043 -3.87813 -2.18865  
H -1.46407 -2.30641 -3.20568  
C -3.14292 -4.26789 -1.01286  
H -3.69591 -3.70049 0.98619  
H -2.47006 -4.55720 -3.03139  
H -3.58325 -5.25545 -0.93622  
C 2.49807 -0.22357 1.24085  
C 3.37166 -0.78643 0.30511  
C 2.99718 0.27336 2.44946  
C 4.72939 -0.82180 0.57087  
H 2.99083 -1.23639 -0.60406  
C 4.35591 0.23637 2.70339  
H 2.31502 0.69261 3.18186  
C 5.22147 -0.30657 1.76257  
H 5.40455 -1.26273 -0.15276  
H 4.74071 0.62796 3.63742  
H 6.28588 -0.33943 1.96513  
Cl -2.50910 1.12169 -0.39320  
S -0.81934 0.44411 -3.18547

**R = Mes**

P 0.84042 -0.17994 1.38500  
C 0.50540 -0.56781 -0.17847  
P -0.99400 -0.45776 -1.07293  
Cl 1.66376 -2.58462 -2.22608  
Si 1.79284 -0.50250 -1.67813  
Au -0.53706 0.16100 3.07518  
Cl -1.91945 0.46720 4.83948  
C -1.98352 -1.93825 -1.37123  
C -1.83991 -3.11229 -0.60463  
C -2.94317 -1.87701 -2.40551  
C -2.62998 -4.20791 -0.92443  
C -3.70521 -3.00717 -2.66720  
C -3.55846 -4.18676 -1.95417  
H -2.51679 -5.11034 -0.33240  
H -4.44564 -2.95411 -3.45913  
C 2.62422 -0.11522 1.61553  
C 3.34441 -1.28746 1.88206  
C 3.25599 1.13794 1.59745  
C 4.70767 -1.18009 2.12106  
C 4.62028 1.18962 1.83947  
C 5.36410 0.04414 2.09983  
H 5.27209 -2.08243 2.33544  
H 5.11655 2.15519 1.82666  
C -0.89750 -3.26172 0.54873  
H 0.14011 -3.16601 0.22653  
H -1.08083 -2.51690 1.32637  
H -1.02281 -4.24620 0.99946  
C -3.20858 -0.66896 -3.25559  
H -3.19915 0.26471 -2.69256  
H -2.46469 -0.57662 -4.05029

H -4.18982 -0.76182 -3.72230  
C -4.36749 -5.39952 -2.28869  
H -5.31797 -5.13011 -2.75165  
H -3.82585 -6.03576 -2.99564  
H -4.57175 -5.99956 -1.40038  
C 6.84087 0.12757 2.33072  
H 7.11334 1.05652 2.83470  
H 7.19863 -0.70949 2.93210  
H 7.37946 0.10243 1.37827  
C 2.68402 -2.63194 1.90013  
H 1.73043 -2.61120 2.43717  
H 2.48187 -2.98094 0.88278  
H 3.32192 -3.37130 2.38536  
C 2.49304 2.39144 1.29795  
H 2.16547 2.40896 0.25367  
H 1.59854 2.48299 1.92290  
H 3.10965 3.27403 1.46934  
S -0.17840 0.34647 -2.72063  
Cl -2.29805 0.81756 -0.15408

**R = Mes\***

P -1.17730 0.65110 0.10483  
C -0.39219 -0.77719 0.36850  
P 1.29803 -1.23122 0.56265  
Cl -1.92970 -2.89930 -1.48406  
C 2.91092 -0.51969 0.08869  
C 3.46375 -1.03161 -1.12526  
C 3.79028 0.03188 1.06123  
C 4.81476 -1.33919 -1.12718  
C 5.13213 -0.32902 0.97923  
C 5.65443 -1.09816 -0.04697  
H 5.23335 -1.77329 -2.02629  
H 5.79635 0.03249 1.75134  
C -2.95322 0.27810 0.15452  
C -3.71084 0.15027 -1.04169  
C -3.50735 -0.13499 1.39270  
C -4.87803 -0.60063 -0.98078  
C -4.66463 -0.90443 1.35267  
C -5.33626 -1.20525 0.18082  
H -5.44174 -0.74456 -1.88729  
H -5.06079 -1.27656 2.28872  
C -3.37812 0.86406 -2.36570  
C -3.05023 0.28658 2.80659  
C -6.54699 -2.13117 0.20840  
C 3.48157 1.15912 2.07058  
C 2.77009 -1.08045 -2.50281  
C 7.09823 -1.58160 -0.07207  
C -4.25649 0.96222 3.48729  
H -3.96732 1.29572 4.48733  
H -4.58614 1.83593 2.91965  
H -5.10905 0.29236 3.59713  
C -1.93061 1.32295 2.85437  
H -0.95436 0.90980 2.59961  
H -2.13509 2.18600 2.21457  
H -1.84277 1.69934 3.87732  
C -2.62535 -0.92836 3.63573  
H -3.42650 -1.66531 3.71595  
H -1.76207 -1.42932 3.19370  
H -2.35952 -0.61102 4.64805  
C -7.63079 -1.54131 1.11822  
H -8.49923 -2.20519 1.14501  
H -7.27806 -1.41593 2.14390  
H -7.96024 -0.56505 0.75394  
C -7.14773 -2.34279 -1.17873  
H -7.99187 -3.03265 -1.10685  
H -7.52236 -1.41046 -1.60925

|    |          |          |          |
|----|----------|----------|----------|
| H  | -6.42318 | -2.77753 | -1.87149 |
| C  | -6.10653 | -3.49475 | 0.75528  |
| H  | -5.32923 | -3.93468 | 0.12631  |
| H  | -5.70838 | -3.41475 | 1.76883  |
| H  | -6.95775 | -4.18073 | 0.78221  |
| C  | -4.40873 | 0.56355  | -3.45866 |
| H  | -5.41696 | 0.87496  | -3.17693 |
| H  | -4.13421 | 1.12520  | -4.35416 |
| H  | -4.42833 | -0.49525 | -3.72780 |
| C  | -3.43230 | 2.37765  | -2.11689 |
| H  | -4.42453 | 2.67454  | -1.76814 |
| H  | -2.70484 | 2.70466  | -1.37075 |
| H  | -3.21780 | 2.91891  | -3.04211 |
| C  | -2.02211 | 0.46599  | -2.95041 |
| H  | -1.17829 | 0.76710  | -2.32691 |
| H  | -1.95738 | -0.61160 | -3.10404 |
| H  | -1.88099 | 0.96965  | -3.91087 |
| C  | 2.05152  | 1.68124  | 2.04252  |
| H  | 1.73699  | 1.89720  | 1.01884  |
| H  | 1.33105  | 1.01233  | 2.50465  |
| H  | 2.00567  | 2.62640  | 2.58798  |
| C  | 4.34919  | 2.35113  | 1.60626  |
| H  | 4.15921  | 3.20543  | 2.26091  |
| H  | 5.41605  | 2.12933  | 1.64155  |
| H  | 4.09352  | 2.64751  | 0.58654  |
| C  | 3.87943  | 0.80804  | 3.50664  |
| H  | 4.93581  | 0.54499  | 3.58749  |
| H  | 3.70938  | 1.67585  | 4.14913  |
| H  | 3.29382  | -0.02265 | 3.89898  |
| C  | 1.32456  | -0.60036 | -2.51796 |
| H  | 1.01602  | -0.45774 | -3.55653 |
| H  | 0.62735  | -1.31392 | -2.08232 |
| H  | 1.21994  | 0.36571  | -2.01626 |
| C  | 2.84704  | -2.46026 | -3.16024 |
| H  | 2.27967  | -3.19968 | -2.59528 |
| H  | 2.42445  | -2.40478 | -4.16684 |
| H  | 3.87503  | -2.81529 | -3.25528 |
| C  | 3.54974  | -0.07380 | -3.37634 |
| H  | 3.51537  | 0.92913  | -2.94417 |
| H  | 4.59631  | -0.35313 | -3.50201 |
| H  | 3.09089  | -0.03152 | -4.36759 |
| C  | 7.84653  | -1.23572 | 1.21241  |
| H  | 7.94051  | -0.15601 | 1.35369  |
| H  | 7.35638  | -1.65830 | 2.09304  |
| H  | 8.85751  | -1.64698 | 1.16619  |
| C  | 7.83744  | -0.93876 | -1.25187 |
| H  | 7.38242  | -1.20041 | -2.20915 |
| H  | 7.84022  | 0.15058  | -1.16681 |
| H  | 8.87555  | -1.28116 | -1.27299 |
| C  | 7.10266  | -3.10618 | -0.23860 |
| H  | 6.59043  | -3.59282 | 0.59477  |
| H  | 6.60690  | -3.41401 | -1.16132 |
| H  | 8.13091  | -3.47634 | -0.27028 |
| Au | -0.28515 | 2.63797  | -0.35684 |
| Cl | 0.64063  | 4.65413  | -0.84272 |
| Si | -1.13959 | -2.64134 | 0.49817  |
| S  | 1.13900  | -3.11493 | -0.08331 |
| Cl | 1.44277  | -1.45281 | 2.60361  |

#### Coordination through $\pi(\text{C}=\text{P})$ bond

##### R = H

|    |          |          |          |
|----|----------|----------|----------|
| P  | 0.62478  | 0.20211  | 1.07577  |
| C  | 0.32360  | -0.00516 | -0.61658 |
| P  | -1.18927 | -0.30757 | -1.43198 |
| Cl | 1.20843  | -2.67972 | -1.89312 |

|    |          |          |          |
|----|----------|----------|----------|
| Si | 1.43760  | -0.56971 | -2.18437 |
| H  | 2.02641  | -0.07338 | 1.02576  |
| H  | -1.58394 | -1.62044 | -1.12916 |
| Cl | -2.82442 | 0.72047  | -0.84345 |
| Au | 0.72122  | 2.09097  | -0.35678 |
| Cl | 1.09077  | 4.28850  | -0.61972 |
| S  | -0.64646 | -0.07591 | -3.32050 |

##### R = Me

|    |          |          |          |
|----|----------|----------|----------|
| P  | 0.65747  | 0.24799  | 0.96127  |
| C  | 0.31385  | 0.01064  | -0.71847 |
| P  | -1.22496 | -0.37669 | -1.45442 |
| Cl | 1.55466  | -2.61407 | -1.88312 |
| Si | 1.41916  | -0.50519 | -2.29587 |
| Cl | -2.76420 | 0.87892  | -1.02943 |
| Au | 0.65453  | 2.12736  | -0.50301 |
| Cl | 0.98583  | 4.33901  | -0.73611 |
| C  | 2.43888  | -0.16541 | 1.07937  |
| H  | 2.88671  | 0.41705  | 1.88640  |
| H  | 2.50694  | -1.22556 | 1.34448  |
| H  | 2.98875  | -0.00227 | 0.15104  |
| C  | -1.82657 | -1.96403 | -0.87420 |
| H  | -2.07703 | -1.89081 | 0.18551  |
| H  | -2.71152 | -2.23404 | -1.45196 |
| H  | -1.03288 | -2.69644 | -1.03500 |
| S  | -0.70500 | -0.36784 | -3.37627 |

##### R = t-Bu

|    |          |          |          |
|----|----------|----------|----------|
| P  | 0.59284  | 0.29477  | 0.85546  |
| C  | 0.35940  | 0.11124  | -0.85804 |
| P  | -1.20848 | -0.30187 | -1.56500 |
| Cl | 2.17501  | -1.94761 | -2.55162 |
| Si | 1.41043  | 0.05713  | -2.54838 |
| Au | 0.55266  | 2.24596  | -0.50567 |
| Cl | 0.81228  | 4.48393  | -0.50337 |
| C  | 2.39210  | 0.00730  | 1.26868  |
| C  | 2.50033  | -1.50828 | 1.47240  |
| C  | 3.41440  | 0.48372  | 0.25084  |
| C  | 2.60334  | 0.72860  | 2.60215  |
| H  | 1.75055  | -1.88463 | 2.17544  |
| H  | 2.39858  | -2.04605 | 0.52736  |
| H  | 3.48463  | -1.74226 | 1.89085  |
| H  | 3.34410  | 1.55880  | 0.07338  |
| H  | 4.42111  | 0.27337  | 0.62842  |
| H  | 3.32185  | -0.03560 | -0.70536 |
| H  | 3.60519  | 0.50477  | 2.98032  |
| H  | 2.52099  | 1.81254  | 2.49005  |
| H  | 1.88083  | 0.40913  | 3.35817  |
| C  | -1.93919 | -1.91181 | -1.00020 |
| C  | -3.13634 | -2.20735 | -1.90326 |
| C  | -0.87847 | -2.99700 | -1.16684 |
| C  | -2.37886 | -1.81375 | 0.45772  |
| H  | -3.92314 | -1.45825 | -1.80105 |
| H  | -2.84441 | -2.27131 | -2.95318 |
| H  | -3.55227 | -3.17502 | -1.60989 |
| H  | -0.01088 | -2.82819 | -0.52754 |
| H  | -1.32647 | -3.95366 | -0.88397 |
| H  | -0.52880 | -3.07515 | -2.19661 |
| H  | -2.75876 | -2.79283 | 0.76289  |
| H  | -1.55260 | -1.55588 | 1.12329  |
| H  | -3.17593 | -1.08350 | 0.59898  |
| Cl | -2.67266 | 1.04881  | -1.13506 |
| S  | -0.75076 | -0.27322 | -3.50700 |

##### R = Ph

|    |          |          |          |
|----|----------|----------|----------|
| P  | 0.65420  | 0.20093  | 1.06346  |
| C  | 0.20028  | 0.20575  | -0.60991 |
| P  | -1.44178 | -0.00264 | -1.18708 |
| Cl | 1.20626  | -1.83595 | -2.89086 |
| Si | 1.03859  | 0.25744  | -2.42400 |
| Au | 0.58511  | 2.28150  | -0.11246 |
| Cl | 0.94636  | 4.50201  | -0.00417 |
| C  | 2.42582  | -0.14724 | 1.11642  |
| C  | 3.09593  | 0.30919  | 2.25635  |
| C  | 3.12831  | -0.87148 | 0.15175  |
| C  | 4.45207  | 0.08123  | 2.40760  |
| H  | 2.55149  | 0.85858  | 3.01823  |
| C  | 4.48332  | -1.10807 | 0.31544  |
| H  | 2.61490  | -1.27903 | -0.71075 |
| C  | 5.14668  | -0.62640 | 1.43543  |
| H  | 4.96798  | 0.45204  | 3.28549  |
| H  | 5.02252  | -1.67258 | -0.43633 |
| H  | 6.20810  | -0.81061 | 1.55600  |
| C  | -1.98912 | -1.70607 | -1.01936 |
| C  | -2.21783 | -2.48187 | -2.14925 |
| C  | -2.16975 | -2.24105 | 0.25580  |
| C  | -2.63156 | -3.79706 | -2.00159 |
| H  | -2.06344 | -2.05883 | -3.13417 |
| C  | -2.57784 | -3.55530 | 0.39277  |
| H  | -1.99808 | -1.63334 | 1.13773  |
| C  | -2.80974 | -4.33218 | -0.73578 |
| H  | -2.80962 | -4.40423 | -2.88105 |
| H  | -2.71821 | -3.97460 | 1.38198  |
| H  | -3.13104 | -5.36144 | -0.62440 |
| Cl | -2.83696 | 1.04495  | -0.14080 |
| S  | -1.24551 | 0.61806  | -3.06674 |

**R = Mes**

|    |          |          |          |
|----|----------|----------|----------|
| P  | 0.61996  | 0.13967  | 1.60858  |
| C  | 0.01612  | 0.27490  | -0.01679 |
| P  | -1.56650 | 0.06414  | -0.77317 |
| Cl | 1.30835  | -1.13767 | -2.63743 |
| Si | 1.02199  | 0.77305  | -1.67954 |
| Au | 0.06481  | 2.30113  | 0.76730  |
| Cl | -0.04647 | 4.52170  | 1.17234  |
| C  | 2.41433  | -0.10067 | 1.37280  |
| C  | 3.37417  | 0.84677  | 1.76344  |
| C  | 2.81681  | -1.38401 | 0.95313  |
| C  | 4.71922  | 0.52503  | 1.62579  |
| C  | 4.17250  | -1.65459 | 0.84008  |
| C  | 5.14115  | -0.70698 | 1.14663  |
| H  | 5.46058  | 1.26374  | 1.91543  |
| H  | 4.47956  | -2.64438 | 0.51559  |
| C  | -1.99289 | -1.67696 | -1.03923 |
| C  | -2.16649 | -2.23788 | -2.32711 |
| C  | -2.13112 | -2.49555 | 0.10537  |
| C  | -2.37517 | -3.60826 | -2.41983 |
| C  | -2.32724 | -3.85955 | -0.06380 |
| C  | -2.43115 | -4.44375 | -1.31502 |
| H  | -2.50299 | -4.03557 | -3.40905 |
| H  | -2.41890 | -4.47900 | 0.82292  |
| C  | 3.01097  | 2.18560  | 2.32795  |
| H  | 2.73724  | 2.89822  | 1.54430  |
| H  | 2.16344  | 2.12767  | 3.01611  |
| H  | 3.85475  | 2.60905  | 2.87468  |
| C  | 1.82934  | -2.48049 | 0.67961  |
| H  | 1.09433  | -2.57163 | 1.48667  |
| H  | 1.28128  | -2.31465 | -0.25026 |
| H  | 2.34281  | -3.43899 | 0.59488  |
| C  | 6.59645  | -1.00972 | 0.96963  |
| H  | 7.21385  | -0.40721 | 1.63788  |

|    |          |          |          |
|----|----------|----------|----------|
| H  | 6.81071  | -2.06352 | 1.15742  |
| H  | 6.91155  | -0.79066 | -0.05543 |
| C  | -2.17860 | -1.99459 | 1.51820  |
| H  | -1.89357 | -2.79143 | 2.20625  |
| H  | -1.53520 | -1.14126 | 1.72284  |
| H  | -3.19781 | -1.68738 | 1.76884  |
| C  | -2.18451 | -1.48192 | -3.62288 |
| H  | -2.87160 | -0.63624 | -3.59960 |
| H  | -1.19868 | -1.09407 | -3.88017 |
| H  | -2.50344 | -2.15356 | -4.42045 |
| C  | -2.60162 | -5.92121 | -1.47195 |
| H  | -1.63127 | -6.40137 | -1.63258 |
| H  | -3.04720 | -6.36928 | -0.58263 |
| H  | -3.22848 | -6.16030 | -2.33277 |
| S  | -1.21906 | 1.24634  | -2.34899 |
| Cl | -3.16512 | 0.82581  | 0.25742  |

**R = Mes\***

|    |          |          |          |
|----|----------|----------|----------|
| P  | 0.68880  | 0.23202  | 0.99258  |
| C  | 0.43514  | 0.13511  | -0.74565 |
| P  | -1.13396 | -0.09323 | -1.62948 |
| Cl | 2.78080  | -0.81485 | -3.02666 |
| Au | 0.53459  | 2.28821  | -0.33601 |
| Cl | 0.42489  | 4.55150  | -0.10084 |
| C  | 2.52074  | 0.06628  | 1.16768  |
| C  | 3.20164  | -1.10285 | 0.72790  |
| C  | 3.29828  | 1.16944  | 1.60675  |
| C  | 4.53937  | -0.98897 | 0.38428  |
| C  | 4.63456  | 1.21630  | 1.20655  |
| C  | 5.25845  | 0.19268  | 0.51712  |
| H  | 5.04964  | -1.86787 | 0.01140  |
| H  | 5.20917  | 2.09197  | 1.47253  |
| C  | 2.90202  | 2.23225  | 2.65494  |
| C  | 2.66916  | -2.54474 | 0.85189  |
| C  | 6.68734  | 0.28736  | -0.00389 |
| C  | 3.78035  | 1.92566  | 3.88615  |
| H  | 3.58496  | 0.91960  | 4.26677  |
| H  | 4.84453  | 1.99774  | 3.65847  |
| H  | 3.55437  | 2.64177  | 4.68105  |
| C  | 3.20302  | 3.65841  | 2.18594  |
| H  | 2.61887  | 3.92774  | 1.30606  |
| H  | 2.94533  | 4.36286  | 2.98158  |
| H  | 4.25982  | 3.80278  | 1.95568  |
| C  | 1.46162  | 2.18151  | 3.15611  |
| H  | 1.37156  | 2.84789  | 4.01841  |
| H  | 0.73858  | 2.52898  | 2.41788  |
| H  | 1.17784  | 1.18043  | 3.49161  |
| C  | 2.95813  | -3.38724 | -0.39283 |
| H  | 2.51990  | -2.94239 | -1.28447 |
| H  | 4.02804  | -3.50439 | -0.57116 |
| H  | 2.54228  | -4.39022 | -0.26111 |
| C  | 3.42753  | -3.15974 | 2.04424  |
| H  | 4.50545  | -3.16160 | 1.87631  |
| H  | 3.23204  | -2.60083 | 2.96291  |
| H  | 3.10335  | -4.19369 | 2.19618  |
| C  | 1.18756  | -2.67388 | 1.18368  |
| H  | 0.91544  | -2.11101 | 2.08206  |
| H  | 0.54625  | -2.36079 | 0.36131  |
| H  | 0.96030  | -3.72411 | 1.38868  |
| C  | 7.30248  | 1.66208  | 0.24334  |
| H  | 6.71616  | 2.45713  | -0.22366 |
| H  | 7.39568  | 1.88293  | 1.30992  |
| H  | 8.30667  | 1.69426  | -0.18617 |
| C  | 6.67565  | 0.02814  | -1.51525 |
| H  | 7.69300  | 0.08052  | -1.91342 |
| H  | 6.26966  | -0.95702 | -1.75303 |



|    |          |          |          |
|----|----------|----------|----------|
| H  | 6.06487  | 0.76955  | -2.03520 |
| C  | 7.56468  | -0.76423 | 0.68529  |
| H  | 7.58456  | -0.61021 | 1.76715  |
| H  | 7.20868  | -1.77894 | 0.49595  |
| H  | 8.59090  | -0.69849 | 0.31315  |
| C  | -2.36610 | -1.47588 | -1.68097 |
| C  | -2.35456 | -2.31940 | -2.83401 |
| C  | -3.58471 | -1.35273 | -0.95794 |
| C  | -3.57404 | -2.59384 | -3.43360 |
| C  | -1.16455 | -3.15623 | -3.34214 |
| C  | -4.76352 | -1.69305 | -1.61323 |
| C  | -3.73095 | -1.07284 | 0.54926  |
| C  | -4.79576 | -2.20608 | -2.89943 |
| H  | -3.56384 | -3.17285 | -4.34863 |
| C  | -0.80203 | -2.89444 | -4.80534 |
| C  | -1.61395 | -4.62955 | -3.22516 |
| C  | 0.06428  | -3.04332 | -2.45616 |
| H  | -5.69366 | -1.54787 | -1.08227 |
| C  | -2.42693 | -0.75183 | 1.25844  |
| C  | -4.22785 | -2.40526 | 1.14922  |
| C  | -4.75800 | 0.01503  | 0.87375  |
| C  | -6.08692 | -2.44399 | -3.67022 |
| H  | -0.06723 | -3.63426 | -5.13349 |
| H  | -1.67402 | -2.98274 | -5.45727 |
| H  | -0.37080 | -1.90519 | -4.94418 |
| H  | -2.42087 | -4.87958 | -3.91463 |
| H  | -0.76421 | -5.27645 | -3.45903 |
| H  | -1.94889 | -4.86131 | -2.21128 |
| H  | 0.51200  | -2.05273 | -2.45404 |
| H  | -0.17274 | -3.33590 | -1.43124 |
| H  | 0.83583  | -3.72373 | -2.82338 |
| H  | -1.65260 | -1.48641 | 1.02705  |
| H  | -2.05366 | 0.24511  | 1.03296  |
| H  | -2.58282 | -0.78066 | 2.33961  |
| H  | -4.32586 | -2.29736 | 2.23283  |
| H  | -5.19820 | -2.70069 | 0.74841  |
| H  | -3.51919 | -3.21283 | 0.94987  |
| H  | -5.74762 | -0.21541 | 0.47600  |
| H  | -4.85633 | 0.10369  | 1.95874  |
| H  | -4.45269 | 0.98581  | 0.48432  |
| C  | -7.31225 | -1.93548 | -2.91555 |
| C  | -6.26633 | -3.94453 | -3.93071 |
| C  | -6.00038 | -1.70223 | -5.00973 |
| H  | -7.46925 | -2.47566 | -1.97839 |
| H  | -7.23574 | -0.86874 | -2.69112 |
| H  | -8.20414 | -2.08221 | -3.52899 |
| H  | -5.44692 | -4.35628 | -4.52305 |
| H  | -6.31794 | -4.50249 | -2.99256 |
| H  | -7.19444 | -4.11907 | -4.48158 |
| H  | -5.88389 | -0.62696 | -4.85549 |
| H  | -5.15574 | -2.04753 | -5.60920 |
| H  | -6.91299 | -1.86708 | -5.58871 |
| Cl | -2.41976 | 1.46133  | -1.23611 |
| Si | 1.53188  | 0.75819  | -2.29431 |
| S  | -0.44371 | 0.29573  | -3.47393 |

**[R-P=C(Si(II)Cl)-P(S)MeR](AuCl)**

**Coordination through Si(II) atom**

**R= H**

|    |          |          |          |
|----|----------|----------|----------|
| P  | 0.75394  | 0.26943  | 0.84892  |
| C  | 0.42809  | -0.15575 | -0.72338 |
| P  | -1.15679 | -0.24132 | -1.48835 |
| Cl | 1.60496  | -2.37095 | -2.55308 |
| Si | 1.47617  | -0.30348 | -2.32355 |

|    |          |          |          |
|----|----------|----------|----------|
| H  | 2.17646  | 0.30539  | 0.72701  |
| H  | -1.69274 | -1.53930 | -1.35932 |
| Au | 3.21606  | 1.04096  | -2.75330 |
| Cl | 4.98518  | 2.45186  | -3.11433 |
| C  | -2.43698 | 0.83975  | -0.84582 |
| H  | -3.34328 | 0.72267  | -1.44298 |
| H  | -2.64680 | 0.57218  | 0.19257  |
| H  | -2.08989 | 1.87190  | -0.90190 |
| S  | -0.55546 | 0.15121  | -3.36741 |

**R = Me**

|    |          |          |          |
|----|----------|----------|----------|
| P  | 0.71269  | 0.13905  | 0.83425  |
| C  | 0.37516  | -0.15845 | -0.76542 |
| P  | -1.24249 | -0.25286 | -1.45573 |
| Cl | 1.70538  | -2.28495 | -2.63123 |
| Si | 1.35038  | -0.23471 | -2.40736 |
| C  | -2.40415 | 0.98323  | -0.85725 |
| H  | -3.34394 | 0.89898  | -1.40652 |
| H  | -2.58758 | 0.82583  | 0.20808  |
| H  | -1.97692 | 1.97351  | -1.01448 |
| C  | 2.53694  | 0.16553  | 0.91129  |
| H  | 2.98236  | 0.55899  | -0.00637 |
| H  | 2.85284  | 0.76295  | 1.76774  |
| H  | 2.89350  | -0.85827 | 1.06329  |
| C  | -2.00235 | -1.86199 | -1.18580 |
| H  | -2.21660 | -1.99284 | -0.12262 |
| H  | -2.92589 | -1.93459 | -1.76346 |
| H  | -1.30223 | -2.62909 | -1.51860 |
| Au | 2.96870  | 1.24088  | -2.91477 |
| Cl | 4.62093  | 2.77889  | -3.33527 |
| S  | -0.70877 | 0.03298  | -3.38904 |

**R = t-Bu**

|    |          |          |          |
|----|----------|----------|----------|
| P  | 0.71338  | 0.00488  | 0.64588  |
| C  | 0.53946  | -0.40414 | -0.95873 |
| P  | -1.08102 | -0.48123 | -1.68335 |
| Cl | 2.14366  | -2.55152 | -2.69361 |
| Si | 1.54595  | -0.55347 | -2.58531 |
| C  | -2.03553 | 1.01718  | -1.37023 |
| H  | -2.98137 | 0.98737  | -1.91271 |
| H  | -2.22028 | 1.12631  | -0.30040 |
| H  | -1.44439 | 1.86211  | -1.72433 |
| Au | 2.96588  | 1.07578  | -3.22282 |
| Cl | 4.38710  | 2.79524  | -3.78342 |
| C  | 2.51703  | 0.15142  | 1.08230  |
| C  | 3.44782  | -0.77196 | 0.31281  |
| C  | 2.87788  | 1.62168  | 0.83692  |
| C  | 2.58792  | -0.15427 | 2.58127  |
| H  | 3.14121  | -1.81782 | 0.37906  |
| H  | 3.51611  | -0.49596 | -0.74140 |
| H  | 4.45806  | -0.68999 | 0.72738  |
| H  | 2.20012  | 2.30451  | 1.35850  |
| H  | 3.88713  | 1.80824  | 1.21828  |
| H  | 2.87113  | 1.86729  | -0.22729 |
| H  | 3.60564  | 0.02717  | 2.93902  |
| H  | 1.91126  | 0.48007  | 3.16038  |
| H  | 2.34049  | -1.19771 | 2.79458  |
| C  | -2.10891 | -1.93715 | -1.18838 |
| C  | -3.30476 | -2.01590 | -2.13729 |
| C  | -1.25712 | -3.19715 | -1.31584 |
| C  | -2.57640 | -1.75442 | 0.25481  |
| H  | -3.96336 | -1.14873 | -2.05253 |
| H  | -2.98826 | -2.11625 | -3.17770 |
| H  | -3.89464 | -2.90040 | -1.88166 |
| H  | -0.40071 | -3.17944 | -0.64012 |
| H  | -1.87524 | -4.06239 | -1.06104 |

|   |          |          |          |
|---|----------|----------|----------|
| H | -0.88262 | -3.33288 | -2.33160 |
| H | -3.11417 | -2.65543 | 0.56281  |
| H | -1.73985 | -1.61718 | 0.94435  |
| H | -3.25989 | -0.91034 | 0.36582  |
| S | -0.48940 | -0.57730 | -3.62445 |

**R = Ph**

|    |          |          |          |
|----|----------|----------|----------|
| P  | 0.86727  | -0.35721 | 0.42567  |
| C  | 0.49725  | -0.27810 | -1.19941 |
| P  | -1.19745 | -0.36990 | -1.70006 |
| Cl | 2.12119  | -2.15790 | -3.11757 |
| Si | 1.27385  | -0.25724 | -2.94558 |
| C  | -2.10420 | 1.14313  | -1.33987 |
| H  | -3.09619 | 1.10854  | -1.79343 |
| H  | -2.18405 | 1.28784  | -0.26074 |
| H  | -1.53781 | 1.96837  | -1.77301 |
| Au | 2.38156  | 1.52008  | -3.77716 |
| Cl | 3.50805  | 3.36695  | -4.55804 |
| C  | -2.11733 | -1.74963 | -1.00400 |
| C  | -1.65133 | -3.03886 | -1.26433 |
| C  | -3.25000 | -1.56395 | -0.21599 |
| C  | -2.31631 | -4.13002 | -0.73563 |
| H  | -0.77175 | -3.18220 | -1.88356 |
| C  | -3.91249 | -2.66341 | 0.30923  |
| H  | -3.62377 | -0.56922 | -0.00656 |
| C  | -3.44659 | -3.94283 | 0.05040  |
| H  | -1.95413 | -5.13061 | -0.93963 |
| H  | -4.79484 | -2.51738 | 0.92099  |
| H  | -3.96705 | -4.80034 | 0.46108  |
| C  | 2.64533  | -0.25343 | 0.63419  |
| C  | 3.09457  | -0.61526 | 1.91071  |
| C  | 3.57374  | 0.18070  | -0.31725 |
| C  | 4.44355  | -0.57528 | 2.21932  |
| H  | 2.37597  | -0.93293 | 2.66016  |
| C  | 4.91771  | 0.23367  | -0.00044 |
| H  | 3.25028  | 0.50458  | -1.30121 |
| C  | 5.35424  | -0.15091 | 1.26272  |
| H  | 4.78352  | -0.86712 | 3.20602  |
| H  | 5.62796  | 0.58014  | -0.74189 |
| H  | 6.41070  | -0.11040 | 1.50279  |
| S  | -0.86012 | -0.57445 | -3.69075 |

**R = Mes**

|    |          |          |          |
|----|----------|----------|----------|
| P  | 0.83983  | 0.63401  | 0.28743  |
| C  | 0.54026  | -0.49847 | -0.89992 |
| P  | -0.96828 | -0.71549 | -1.82393 |
| Cl | 1.58119  | -3.40989 | -1.52984 |
| Si | 1.73209  | -1.39065 | -2.09476 |
| C  | -1.92013 | 0.79205  | -2.11404 |
| H  | -2.69043 | 0.56676  | -2.85477 |
| H  | -2.38985 | 1.15983  | -1.20417 |
| H  | -1.23988 | 1.54436  | -2.51406 |
| Au | 3.74558  | -0.60729 | -2.72558 |
| Cl | 5.80204  | 0.26604  | -3.30185 |
| C  | -2.10053 | -1.97108 | -1.14049 |
| C  | -2.40870 | -3.18915 | -1.79149 |
| C  | -2.67386 | -1.69727 | 0.12086  |
| C  | -3.24216 | -4.09123 | -1.14142 |
| C  | -3.49050 | -2.64839 | 0.71903  |
| C  | -3.78251 | -3.85810 | 0.11396  |
| H  | -3.47402 | -5.02287 | -1.64735 |
| H  | -3.91305 | -2.42366 | 1.69357  |
| C  | 2.61580  | 0.48670  | 0.61607  |
| C  | 3.12392  | -0.57586 | 1.37789  |
| C  | 3.46102  | 1.51063  | 0.15987  |
| C  | 4.48987  | -0.61277 | 1.62569  |

|   |          |          |          |
|---|----------|----------|----------|
| C | 4.81778  | 1.42443  | 0.42686  |
| C | 5.35489  | 0.36157  | 1.14296  |
| H | 4.89138  | -1.43458 | 2.21113  |
| H | 5.47810  | 2.19247  | 0.03698  |
| C | 2.23998  | -1.65499 | 1.93120  |
| H | 1.33779  | -1.24333 | 2.39457  |
| H | 1.91439  | -2.34973 | 1.15240  |
| H | 2.77020  | -2.23136 | 2.69042  |
| C | 2.93207  | 2.64323  | -0.66592 |
| H | 2.79766  | 2.32935  | -1.70609 |
| H | 1.96274  | 3.00052  | -0.29925 |
| H | 3.62376  | 3.48628  | -0.66417 |
| C | 6.83228  | 0.26210  | 1.35716  |
| H | 7.32709  | -0.01580 | 0.42175  |
| H | 7.25385  | 1.21851  | 1.67472  |
| H | 7.07957  | -0.49053 | 2.10711  |
| C | -2.51339 | -0.40892 | 0.87496  |
| H | -1.56368 | 0.09839  | 0.71109  |
| H | -3.31483 | 0.29021  | 0.61551  |
| H | -2.58960 | -0.59426 | 1.94711  |
| C | -1.92579 | -3.60805 | -3.14981 |
| H | -2.14703 | -2.86963 | -3.92050 |
| H | -0.84843 | -3.77566 | -3.16352 |
| H | -2.41647 | -4.54026 | -3.43052 |
| C | -4.63428 | -4.88422 | 0.79132  |
| H | -5.26077 | -5.41716 | 0.07378  |
| H | -4.00855 | -5.62909 | 1.29258  |
| H | -5.27919 | -4.43336 | 1.54685  |
| S | 0.00675  | -1.14478 | -3.56128 |

**R = Mes\***

|    |          |          |          |
|----|----------|----------|----------|
| P  | -0.39879 | 1.43168  | 1.47185  |
| C  | 0.16549  | 0.39367  | 0.28887  |
| P  | 1.78787  | -0.33580 | 0.10515  |
| Cl | -1.22012 | 0.84146  | -2.61418 |
| C  | 3.48608  | 0.35175  | 0.22170  |
| C  | 4.13110  | 0.75887  | -0.98218 |
| C  | 4.30126  | -0.02252 | 1.32383  |
| C  | 5.45051  | 0.36963  | -1.16320 |
| C  | 5.62050  | -0.38023 | 1.06456  |
| C  | 6.19180  | -0.29699 | -0.19580 |
| H  | 5.92639  | 0.62116  | -2.10286 |
| H  | 6.22589  | -0.72042 | 1.89350  |
| C  | -2.19596 | 1.49109  | 1.12443  |
| C  | -2.73436 | 2.54339  | 0.35071  |
| C  | -3.03418 | 0.42966  | 1.55811  |
| C  | -3.99215 | 2.35141  | -0.21640 |
| C  | -4.26764 | 0.30023  | 0.93468  |
| C  | -4.73871 | 1.20249  | -0.01141 |
| H  | -4.39459 | 3.12159  | -0.85473 |
| H  | -4.88721 | -0.54668 | 1.18828  |
| C  | -2.06083 | 3.92402  | 0.21707  |
| C  | -2.75581 | -0.42440 | 2.81586  |
| C  | -6.04961 | 0.92395  | -0.73786 |
| C  | 3.93358  | 0.13831  | 2.81331  |
| C  | 3.58480  | 1.77531  | -2.00444 |
| C  | 7.59455  | -0.80051 | -0.50945 |
| C  | -3.86438 | -1.45188 | 3.06229  |
| H  | -3.63881 | -1.99362 | 3.98379  |
| H  | -4.83961 | -0.97961 | 3.19737  |
| H  | -3.93219 | -2.18519 | 2.25433  |
| C  | -2.74656 | 0.54510  | 4.00885  |
| H  | -1.93781 | 1.27709  | 3.92760  |
| H  | -3.68932 | 1.09312  | 4.07526  |
| H  | -2.60611 | -0.00999 | 4.94104  |
| C  | -1.43966 | -1.20488 | 2.82295  |

|    |          |          |          |
|----|----------|----------|----------|
| H  | -1.32122 | -1.80015 | 1.91544  |
| H  | -0.56803 | -0.55474 | 2.93346  |
| H  | -1.43498 | -1.88168 | 3.68174  |
| C  | -7.18656 | 0.75613  | 0.27693  |
| H  | -8.12640 | 0.55736  | -0.24547 |
| H  | -7.00550 | -0.07805 | 0.95706  |
| H  | -7.31516 | 1.66112  | 0.87665  |
| C  | -6.42937 | 2.04791  | -1.69818 |
| H  | -7.35991 | 1.78926  | -2.20905 |
| H  | -6.59262 | 2.99525  | -1.17682 |
| H  | -5.66493 | 2.20152  | -2.46393 |
| C  | -5.89196 | -0.37130 | -1.54480 |
| H  | -5.09684 | -0.27262 | -2.28772 |
| H  | -5.64278 | -1.22422 | -0.91050 |
| H  | -6.82382 | -0.60103 | -2.06956 |
| C  | -2.94329 | 4.91906  | -0.54049 |
| H  | -3.91923 | 5.04776  | -0.06768 |
| H  | -2.44840 | 5.89307  | -0.54546 |
| H  | -3.09630 | 4.62373  | -1.58117 |
| C  | -1.85335 | 4.49327  | 1.62818  |
| H  | -2.80304 | 4.56210  | 2.16373  |
| H  | -1.17604 | 3.87683  | 2.22461  |
| H  | -1.41972 | 5.49575  | 1.56804  |
| C  | -0.71810 | 3.88907  | -0.51236 |
| H  | 0.04947  | 3.35575  | 0.05388  |
| H  | -0.80197 | 3.40988  | -1.48827 |
| H  | -0.35081 | 4.91024  | -0.65182 |
| C  | 2.55486  | 0.74073  | 3.05473  |
| H  | 2.42215  | 1.66749  | 2.49301  |
| H  | 1.72389  | 0.08047  | 2.81553  |
| H  | 2.44853  | 0.98572  | 4.11419  |
| C  | 4.92603  | 1.18303  | 3.36825  |
| H  | 4.68319  | 1.39003  | 4.41394  |
| H  | 5.95911  | 0.83776  | 3.32566  |
| H  | 4.85849  | 2.12022  | 2.81113  |
| C  | 4.10953  | -1.14808 | 3.62544  |
| H  | 5.12939  | -1.53077 | 3.55491  |
| H  | 3.90827  | -0.94544 | 4.68048  |
| H  | 3.43836  | -1.94513 | 3.30590  |
| C  | 2.21486  | 2.33959  | -1.65267 |
| H  | 2.00429  | 3.19178  | -2.30337 |
| H  | 1.40455  | 1.63015  | -1.80127 |
| H  | 2.19022  | 2.70104  | -0.62195 |
| C  | 3.57704  | 1.24530  | -3.43981 |
| H  | 2.86856  | 0.42683  | -3.55930 |
| H  | 3.28544  | 2.04870  | -4.12127 |
| H  | 4.56360  | 0.89376  | -3.74932 |
| C  | 4.55519  | 2.97453  | -1.93715 |
| H  | 4.60848  | 3.38078  | -0.92400 |
| H  | 5.56668  | 2.71396  | -2.25051 |
| H  | 4.19147  | 3.76340  | -2.60065 |
| C  | 8.23030  | -1.51706 | 0.67882  |
| H  | 8.38297  | -0.84615 | 1.52813  |
| H  | 7.62617  | -2.36478 | 1.01177  |
| H  | 9.21035  | -1.90276 | 0.38920  |
| C  | 8.49280  | 0.37922  | -0.90042 |
| H  | 8.12069  | 0.89887  | -1.78547 |
| H  | 8.56277  | 1.10579  | -0.08723 |
| H  | 9.50137  | 0.02203  | -1.12495 |
| C  | 7.51202  | -1.78645 | -1.68120 |
| H  | 6.88828  | -2.64676 | -1.42703 |
| H  | 7.09057  | -1.32001 | -2.57377 |
| H  | 8.51057  | -2.15286 | -1.93373 |
| Au | -2.09797 | -2.25040 | -0.76565 |
| Cl | -3.61603 | -3.91790 | -0.23800 |
| Si | -0.66055 | -0.55172 | -1.16083 |

|   |         |          |          |
|---|---------|----------|----------|
| S | 1.45909 | -1.06813 | -1.78023 |
| C | 1.80225 | -1.86651 | 1.08160  |
| H | 1.79069 | -1.71186 | 2.15541  |
| H | 0.90147 | -2.40794 | 0.78595  |
| H | 2.67876 | -2.44745 | 0.79155  |

#### Coordination through S atom

##### R= H

|    |          |          |          |
|----|----------|----------|----------|
| P  | 0.61172  | -0.16158 | 1.12559  |
| C  | 0.43974  | -0.32679 | -0.51791 |
| P  | -0.96904 | 0.08908  | -1.46909 |
| Cl | 0.90659  | -2.58053 | -2.51584 |
| Si | 1.73549  | -0.71057 | -1.94948 |
| H  | 1.97889  | -0.58045 | 1.20694  |
| H  | -1.62672 | -1.10303 | -1.81135 |
| Au | -1.39606 | 0.33184  | -4.79958 |
| Cl | -2.85174 | -0.10042 | -6.46251 |
| C  | -2.23058 | 1.16533  | -0.78383 |
| H  | -2.99595 | 1.33385  | -1.54469 |
| H  | -2.67897 | 0.68475  | 0.08915  |
| H  | -1.78106 | 2.11596  | -0.49615 |
| S  | 0.02507  | 0.82824  | -3.08756 |

##### R = Me

|    |          |          |          |
|----|----------|----------|----------|
| P  | 0.70767  | 0.09620  | 0.95232  |
| C  | 0.45656  | -0.15080 | -0.67239 |
| P  | -1.09522 | 0.02739  | -1.46144 |
| Cl | 1.37777  | -2.48362 | -2.49044 |
| Si | 1.66306  | -0.39447 | -2.19848 |
| C  | -2.20282 | 1.28861  | -0.81319 |
| H  | -3.08691 | 1.34802  | -1.45168 |
| H  | -2.50162 | 1.02529  | 0.20420  |
| H  | -1.69014 | 2.25032  | -0.80777 |
| C  | 2.48342  | -0.29545 | 1.18196  |
| H  | 3.07486  | -0.07467 | 0.28933  |
| H  | 2.87286  | 0.26291  | 2.03474  |
| H  | 2.58013  | -1.36213 | 1.40594  |
| C  | -2.00081 | -1.52253 | -1.46444 |
| H  | -2.28316 | -1.76075 | -0.43572 |
| H  | -2.88890 | -1.42631 | -2.09171 |
| H  | -1.35199 | -2.30299 | -1.86258 |
| Au | -1.71255 | -0.51879 | -4.83675 |
| Cl | -3.08971 | -1.49770 | -6.32882 |
| S  | -0.37090 | 0.52447  | -3.31827 |

##### R = t-Bu

|    |          |          |          |
|----|----------|----------|----------|
| P  | 0.70659  | -0.15837 | 0.61335  |
| C  | 0.40685  | -0.31008 | -1.02068 |
| P  | -1.26098 | -0.48156 | -1.57153 |
| Cl | 2.06645  | -2.10855 | -2.95572 |
| Si | 1.35618  | -0.09972 | -2.72846 |
| C  | -2.31670 | 0.88154  | -1.05096 |
| H  | -3.30333 | 0.80367  | -1.50819 |
| H  | -2.39629 | 0.86780  | 0.03830  |
| H  | -1.84994 | 1.81297  | -1.37182 |
| Au | -1.73505 | 1.49479  | -4.40411 |
| Cl | -2.57998 | 3.42437  | -5.20925 |
| C  | 2.55070  | -0.14354 | 0.90511  |
| C  | 2.96685  | -1.61034 | 1.05576  |
| C  | 3.36408  | 0.53578  | -0.18395 |
| C  | 2.74276  | 0.58720  | 2.23638  |
| H  | 2.38004  | -2.12549 | 1.82226  |
| H  | 2.86107  | -2.15310 | 0.11434  |
| H  | 4.01752  | -1.65677 | 1.36240  |

|   |          |          |          |
|---|----------|----------|----------|
| H | 3.01710  | 1.55073  | -0.38898 |
| H | 4.41209  | 0.59801  | 0.12953  |
| H | 3.35258  | -0.02869 | -1.12019 |
| H | 3.79498  | 0.53937  | 2.53218  |
| H | 2.46348  | 1.64161  | 2.16306  |
| H | 2.14869  | 0.13670  | 3.03611  |
| C | -2.08385 | -2.07744 | -1.11518 |
| C | -3.38014 | -2.18847 | -1.91847 |
| C | -1.14646 | -3.22983 | -1.46632 |
| C | -2.38559 | -2.07537 | 0.38238  |
| H | -4.09608 | -1.40352 | -1.66625 |
| H | -3.19639 | -2.16176 | -2.99411 |
| H | -3.84937 | -3.14751 | -1.68264 |
| H | -0.21166 | -3.18073 | -0.90631 |
| H | -1.64642 | -4.17000 | -1.21769 |
| H | -0.90178 | -3.24823 | -2.52959 |
| H | -2.80448 | -3.04953 | 0.64971  |
| H | -1.48715 | -1.92410 | 0.98514  |
| H | -3.12039 | -1.31560 | 0.65587  |
| S | -0.92045 | -0.48927 | -3.61436 |

**R = Ph**

|    |          |          |          |
|----|----------|----------|----------|
| P  | 0.84288  | -0.25088 | 1.09478  |
| C  | 0.40494  | -0.20947 | -0.51674 |
| P  | -1.26707 | -0.05443 | -1.00761 |
| Cl | 1.34870  | -1.65127 | -3.15591 |
| Si | 1.36779  | 0.23525  | -2.16243 |
| C  | -2.35213 | 0.85099  | 0.11014  |
| H  | -3.33577 | 0.95986  | -0.35022 |
| H  | -2.44851 | 0.29939  | 1.04768  |
| H  | -1.92609 | 1.83709  | 0.29580  |
| Au | -2.34221 | 0.35630  | -4.35090 |
| Cl | -3.81288 | -0.25690 | -5.95132 |
| C  | 2.63401  | -0.42175 | 1.08218  |
| C  | 3.31229  | 0.07588  | 2.20049  |
| C  | 3.36859  | -1.00757 | 0.04562  |
| C  | 4.69401  | 0.03038  | 2.26110  |
| H  | 2.74795  | 0.51224  | 3.01896  |
| C  | 4.75110  | -1.05771 | 0.11371  |
| H  | 2.85835  | -1.47157 | -0.79181 |
| C  | 5.41338  | -0.53284 | 1.21497  |
| H  | 5.21210  | 0.42932  | 3.12538  |
| H  | 5.31252  | -1.51444 | -0.69289 |
| H  | 6.49545  | -0.57507 | 1.26463  |
| C  | -2.03612 | -1.65134 | -1.29631 |
| C  | -3.35430 | -1.70863 | -1.75056 |
| C  | -1.32474 | -2.82418 | -1.06332 |
| C  | -3.95352 | -2.93619 | -1.96612 |
| H  | -3.90952 | -0.80243 | -1.96514 |
| C  | -1.93513 | -4.05030 | -1.27735 |
| H  | -0.29641 | -2.77731 | -0.72928 |
| C  | -3.24457 | -4.10633 | -1.72794 |
| H  | -4.97075 | -2.97757 | -2.33590 |
| H  | -1.37868 | -4.96323 | -1.10170 |
| H  | -3.71523 | -5.06660 | -1.90448 |
| S  | -0.92046 | 1.05199  | -2.71369 |

**R = Mes**

|    |          |          |          |
|----|----------|----------|----------|
| P  | 0.89034  | -0.70491 | 1.04260  |
| C  | 0.37810  | -0.89952 | -0.53171 |
| P  | -1.32117 | -0.87710 | -0.99310 |
| Cl | 1.30544  | -2.21964 | -3.20246 |
| Si | 1.33153  | -0.33670 | -2.15055 |
| C  | -2.35374 | -0.08950 | 0.25888  |
| H  | -3.36786 | 0.05809  | -0.10730 |
| H  | -2.37420 | -0.75081 | 1.12941  |

|    |          |          |          |
|----|----------|----------|----------|
| H  | -1.91438 | 0.87121  | 0.52877  |
| Au | -0.92406 | 2.39295  | -1.79154 |
| Cl | -0.81279 | 4.46366  | -0.89521 |
| C  | 2.67391  | -0.36803 | 0.87963  |
| C  | 3.10767  | 0.95094  | 1.09211  |
| C  | 3.60219  | -1.39642 | 0.66457  |
| C  | 4.46833  | 1.22003  | 1.05465  |
| C  | 4.95411  | -1.07839 | 0.64196  |
| C  | 5.40756  | 0.22192  | 0.82498  |
| H  | 4.80304  | 2.24132  | 1.21102  |
| H  | 5.67535  | -1.87463 | 0.48212  |
| C  | -2.15115 | -2.42066 | -1.46565 |
| C  | -3.39560 | -2.32395 | -2.12603 |
| C  | -1.61102 | -3.69204 | -1.17385 |
| C  | -4.03288 | -3.49169 | -2.52712 |
| C  | -2.30473 | -4.81912 | -1.59195 |
| C  | -3.50507 | -4.74845 | -2.28386 |
| H  | -4.98199 | -3.40541 | -3.04712 |
| H  | -1.88138 | -5.79275 | -1.36696 |
| C  | 2.12890  | 2.06266  | 1.31818  |
| H  | 1.62247  | 2.34810  | 0.39072  |
| H  | 1.34850  | 1.77885  | 2.03336  |
| H  | 2.62588  | 2.95255  | 1.70579  |
| C  | 6.86863  | 0.54390  | 0.75942  |
| H  | 7.14869  | 0.85575  | -0.25166 |
| H  | 7.12723  | 1.36146  | 1.43491  |
| H  | 7.48043  | -0.32243 | 1.01643  |
| C  | 3.17487  | -2.81919 | 0.45845  |
| H  | 2.36505  | -3.10491 | 1.13639  |
| H  | 2.81553  | -2.98116 | -0.56228 |
| H  | 4.00906  | -3.50159 | 0.62723  |
| C  | -0.33829 | -3.91944 | -0.41757 |
| H  | 0.51652  | -3.48449 | -0.93495 |
| H  | -0.37460 | -3.48556 | 0.58365  |
| H  | -0.16202 | -4.98998 | -0.31121 |
| C  | -4.13862 | -1.04474 | -2.39372 |
| H  | -3.50030 | -0.17358 | -2.52734 |
| H  | -4.73644 | -1.14769 | -3.30005 |
| H  | -4.83513 | -0.83283 | -1.57604 |
| C  | -4.19346 | -5.98693 | -2.76321 |
| H  | -3.77322 | -6.31022 | -3.72059 |
| H  | -4.06683 | -6.81063 | -2.05833 |
| H  | -5.26097 | -5.81899 | -2.91230 |
| S  | -1.02581 | 0.29022  | -2.69829 |

**R = Mes\***

|   |          |          |          |
|---|----------|----------|----------|
| P | -2.06030 | 1.75853  | 0.57315  |
| C | -1.09406 | 0.42897  | 0.29009  |
| P | 0.67314  | 0.33056  | 0.39738  |
| C | -3.75441 | 1.04291  | 0.47188  |
| C | -4.54078 | 1.31130  | -0.68466 |
| C | -4.23532 | 0.13407  | 1.43888  |
| C | -5.61718 | 0.48013  | -0.94392 |
| C | -5.31976 | -0.67724 | 1.09271  |
| C | -5.98620 | -0.57228 | -0.11046 |
| H | -6.19501 | 0.64344  | -1.84150 |
| H | -5.65702 | -1.40829 | 1.81391  |
| C | -3.82323 | 0.04925  | 2.92525  |
| C | -4.29647 | 2.51100  | -1.62076 |
| C | -7.11653 | -1.50891 | -0.52140 |
| C | -3.00129 | 2.37081  | -2.42240 |
| H | -2.11400 | 2.40556  | -1.78760 |
| H | -2.97397 | 1.42675  | -2.96948 |
| H | -2.91725 | 3.19557  | -3.13646 |
| C | -4.26580 | 3.80361  | -0.79328 |
| H | -5.20317 | 3.93514  | -0.24729 |

|    |          |          |          |
|----|----------|----------|----------|
| H  | -3.44860 | 3.82015  | -0.06952 |
| H  | -4.13283 | 4.66445  | -1.45463 |
| C  | -5.42478 | 2.67747  | -2.64265 |
| H  | -5.46769 | 1.84699  | -3.35111 |
| H  | -6.40184 | 2.78166  | -2.16516 |
| H  | -5.24034 | 3.58628  | -3.22008 |
| C  | -3.45030 | -1.38063 | 3.33082  |
| H  | -2.60472 | -1.74923 | 2.74564  |
| H  | -3.17767 | -1.40454 | 4.38971  |
| H  | -4.27608 | -2.07964 | 3.19059  |
| C  | -2.68410 | 0.96632  | 3.35914  |
| H  | -1.71605 | 0.62450  | 2.99710  |
| H  | -2.83672 | 2.00254  | 3.03861  |
| H  | -2.63781 | 0.97758  | 4.45193  |
| C  | -5.05360 | 0.49403  | 3.73904  |
| H  | -5.32843 | 1.52399  | 3.49716  |
| H  | -5.92225 | -0.13668 | 3.54844  |
| H  | -4.82741 | 0.44235  | 4.80780  |
| C  | -7.36718 | -2.60246 | 0.51336  |
| H  | -7.68957 | -2.19097 | 1.47351  |
| H  | -8.16067 | -3.26441 | 0.15849  |
| H  | -6.47654 | -3.21332 | 0.68020  |
| C  | -6.74411 | -2.18034 | -1.84917 |
| H  | -6.59796 | -1.44738 | -2.64505 |
| H  | -5.81913 | -2.75318 | -1.75216 |
| H  | -7.54054 | -2.86138 | -2.16208 |
| C  | -8.41206 | -0.70922 | -0.70177 |
| H  | -8.31027 | 0.06200  | -1.46792 |
| H  | -9.22491 | -1.37467 | -1.00572 |
| H  | -8.70359 | -0.22002 | 0.23109  |
| C  | 2.04820  | 1.46762  | 0.00627  |
| C  | 2.66563  | 1.34157  | -1.27192 |
| C  | 2.82118  | 1.98590  | 1.07994  |
| C  | 4.05135  | 1.32421  | -1.31067 |
| C  | 4.20528  | 1.93903  | 0.96090  |
| C  | 4.84931  | 1.49996  | -0.18671 |
| H  | 4.52972  | 1.16752  | -2.26928 |
| H  | 4.80007  | 2.27055  | 1.80114  |
| C  | 1.95036  | 1.43708  | -2.63339 |
| C  | 2.29340  | 0.28640  | -3.58209 |
| C  | 2.47041  | 2.74972  | -3.25847 |
| H  | 1.92521  | -0.66724 | -3.20623 |
| H  | 1.82919  | 0.46971  | -4.55468 |
| H  | 3.36903  | 0.19566  | -3.74422 |
| H  | 2.25028  | 3.60540  | -2.61521 |
| H  | 3.54649  | 2.72708  | -3.43417 |
| H  | 1.97437  | 2.90954  | -4.21952 |
| C  | 2.26936  | 2.78582  | 2.27717  |
| C  | 2.87342  | 4.19952  | 2.13632  |
| C  | 2.70556  | 2.22748  | 3.63482  |
| H  | 2.61368  | 4.64090  | 1.17147  |
| H  | 2.47327  | 4.84279  | 2.92477  |
| H  | 3.95987  | 4.19561  | 2.22497  |
| H  | 2.30598  | 1.23290  | 3.83131  |
| H  | 3.79246  | 2.16351  | 3.71094  |
| H  | 2.35922  | 2.89049  | 4.43198  |
| C  | 6.35540  | 1.29899  | -0.27209 |
| C  | 6.95454  | 2.29649  | -1.27081 |
| C  | 6.62933  | -0.13273 | -0.75116 |
| H  | 6.77033  | 3.32748  | -0.95789 |
| H  | 8.03572  | 2.14987  | -1.33939 |
| H  | 6.53921  | 2.16820  | -2.27242 |
| H  | 6.20382  | -0.87308 | -0.06980 |
| H  | 6.20656  | -0.31520 | -1.74110 |
| H  | 7.70754  | -0.30300 | -0.81253 |
| Cl | -2.37101 | -1.37097 | -1.96906 |

|    |          |          |          |
|----|----------|----------|----------|
| Au | 2.57597  | -2.57140 | -0.06295 |
| Cl | 4.40491  | -3.70749 | 0.63074  |
| C  | 0.75939  | 2.99762  | 2.24366  |
| H  | 0.43913  | 3.42323  | 1.29058  |
| H  | 0.16985  | 2.10048  | 2.42247  |
| H  | 0.47937  | 3.70477  | 3.02834  |
| C  | 0.43802  | 1.59579  | -2.54388 |
| H  | -0.08298 | 0.68367  | -2.25717 |
| H  | 0.16638  | 2.39399  | -1.84872 |
| H  | 0.05381  | 1.87459  | -3.52815 |
| C  | 7.03961  | 1.49497  | 1.07809  |
| H  | 6.93912  | 2.51981  | 1.44585  |
| H  | 6.64301  | 0.81253  | 1.83373  |
| H  | 8.10754  | 1.28963  | 0.97634  |
| Si | -1.51734 | -1.47568 | -0.01788 |
| S  | 0.81238  | -1.34430 | -0.81943 |
| C  | 1.01524  | -0.35953 | 2.04147  |
| H  | 2.06891  | -0.63305 | 2.10450  |
| H  | 0.74473  | 0.31901  | 2.84529  |
| H  | 0.40805  | -1.26452 | 2.11683  |

#### Coordination through P(sp<sup>2</sup>) atom

##### R = H

|    |          |          |          |
|----|----------|----------|----------|
| P  | 0.49306  | 0.10708  | 1.03936  |
| C  | 0.31685  | -0.28225 | -0.54193 |
| P  | -1.11039 | -0.20030 | -1.55446 |
| Cl | 1.20250  | -2.76520 | -2.05920 |
| Si | 1.64254  | -0.67043 | -1.97413 |
| H  | 1.86872  | -0.06836 | 1.31235  |
| H  | -1.72236 | -1.46801 | -1.50395 |
| Au | -0.95631 | 0.77862  | 2.55398  |
| Cl | -2.49119 | 1.46545  | 4.05678  |
| C  | -2.40931 | 0.95117  | -1.09730 |
| H  | -2.81950 | 0.68016  | -0.12141 |
| H  | -1.99998 | 1.96105  | -1.06029 |
| H  | -3.19684 | 0.90394  | -1.85282 |
| S  | -0.21995 | 0.14492  | -3.30733 |

##### R = Me

|    |          |          |          |
|----|----------|----------|----------|
| P  | 0.79305  | 0.03053  | 0.86530  |
| C  | 0.38921  | -0.20940 | -0.70450 |
| P  | -1.21205 | -0.22648 | -1.42145 |
| Cl | 1.51496  | -2.57681 | -2.30030 |
| Si | 1.46124  | -0.42694 | -2.34691 |
| C  | -2.31682 | 1.09074  | -0.89083 |
| H  | -3.23800 | 1.03288  | -1.47506 |
| H  | -2.54777 | 0.98337  | 0.17169  |
| H  | -1.83654 | 2.05267  | -1.06953 |
| C  | 2.57839  | -0.14655 | 1.08175  |
| H  | 3.08897  | -0.04177 | 0.12218  |
| H  | 2.93478  | 0.60253  | 1.79003  |
| H  | 2.78700  | -1.13706 | 1.49432  |
| C  | -2.03039 | -1.78287 | -1.04347 |
| H  | -2.25071 | -1.83228 | 0.02550  |
| H  | -2.95528 | -1.85143 | -1.61966 |
| H  | -1.35989 | -2.59511 | -1.32678 |
| Au | -0.56224 | 0.44059  | 2.56067  |
| Cl | -2.01295 | 0.84544  | 4.24706  |
| S  | -0.67817 | -0.07784 | -3.35289 |

##### R = t-Bu

|   |          |          |          |
|---|----------|----------|----------|
| P | 0.79867  | 0.08241  | 0.73968  |
| C | 0.52525  | -0.48270 | -0.78626 |
| P | -1.06151 | -0.56082 | -1.56353 |

|    |          |          |          |
|----|----------|----------|----------|
| Cl | 2.06547  | -2.85740 | -2.25613 |
| Si | 1.65429  | -0.75640 | -2.39338 |
| C  | -2.02569 | 0.95350  | -1.38102 |
| H  | -2.89403 | 0.90814  | -2.04005 |
| H  | -2.34526 | 1.09998  | -0.34783 |
| H  | -1.39264 | 1.78700  | -1.68623 |
| Au | -0.71871 | 0.95559  | 2.10525  |
| Cl | -2.31486 | 1.87052  | 3.42995  |
| C  | 2.58342  | 0.03355  | 1.24221  |
| C  | 2.66191  | 0.48975  | 2.69727  |
| C  | 3.12067  | -1.38995 | 1.10879  |
| C  | 3.36021  | 1.00200  | 0.34777  |
| H  | 2.27793  | 1.50358  | 2.83126  |
| H  | 2.10616  | -0.17309 | 3.36452  |
| H  | 3.70971  | 0.48199  | 3.01081  |
| H  | 3.07681  | -1.75886 | 0.08387  |
| H  | 4.16719  | -1.40048 | 1.42932  |
| H  | 2.57076  | -2.08903 | 1.74368  |
| H  | 4.41145  | 0.99494  | 0.65255  |
| H  | 3.31496  | 0.71858  | -0.70692 |
| H  | 2.99126  | 2.02583  | 0.44617  |
| C  | -2.11215 | -1.98478 | -1.00714 |
| C  | -1.31340 | -3.27559 | -1.15583 |
| C  | -2.53887 | -1.79498 | 0.44543  |
| C  | -3.33765 | -2.02103 | -1.92229 |
| H  | -0.99026 | -3.43745 | -2.18478 |
| H  | -0.42577 | -3.28209 | -0.52162 |
| H  | -1.95171 | -4.11263 | -0.85920 |
| H  | -3.12644 | -0.88888 | 0.60374  |
| H  | -3.16463 | -2.64477 | 0.73320  |
| H  | -1.68479 | -1.77472 | 1.12470  |
| H  | -3.92380 | -2.91077 | -1.67689 |
| H  | -3.98649 | -1.15385 | -1.78347 |
| H  | -3.05555 | -2.08854 | -2.97543 |
| S  | -0.45106 | -0.78797 | -3.47475 |

**R = Ph**

|    |          |          |          |
|----|----------|----------|----------|
| P  | 0.77923  | -0.16379 | 0.87286  |
| C  | 0.40685  | -0.13949 | -0.73132 |
| P  | -1.23761 | -0.12531 | -1.36905 |
| Cl | 1.82974  | -1.85524 | -2.95145 |
| Si | 1.38653  | 0.18155  | -2.40226 |
| C  | -2.32287 | 1.09874  | -0.61638 |
| H  | -3.27619 | 1.09028  | -1.14856 |
| H  | -2.48695 | 0.89067  | 0.44245  |
| H  | -1.85183 | 2.07603  | -0.72465 |
| Au | -0.66435 | -0.05733 | 2.55257  |
| Cl | -2.23475 | 0.03110  | 4.18381  |
| C  | -2.03241 | -1.73310 | -1.19466 |
| C  | -2.76860 | -2.03564 | -0.04873 |
| C  | -1.86646 | -2.69063 | -2.19157 |
| C  | -3.33912 | -3.29010 | 0.09005  |
| H  | -2.89803 | -1.30824 | 0.74438  |
| C  | -2.43995 | -3.94310 | -2.04351 |
| H  | -1.28826 | -2.45078 | -3.07611 |
| C  | -3.17589 | -4.24228 | -0.90633 |
| H  | -3.91109 | -3.52122 | 0.98081  |
| H  | -2.30985 | -4.68700 | -2.82058 |
| H  | -3.62446 | -5.22275 | -0.79428 |
| C  | 2.52812  | -0.25754 | 1.18376  |
| C  | 3.44327  | -0.71311 | 0.23029  |
| C  | 2.98015  | 0.16391  | 2.43825  |
| C  | 4.79498  | -0.71876 | 0.52768  |
| H  | 3.10091  | -1.10109 | -0.72157 |
| C  | 4.33319  | 0.15646  | 2.72423  |
| H  | 2.26599  | 0.50157  | 3.18235  |

|   |          |          |          |
|---|----------|----------|----------|
| C | 5.24023  | -0.28042 | 1.76758  |
| H | 5.50274  | -1.07619 | -0.21078 |
| H | 4.68104  | 0.48859  | 3.69513  |
| H | 6.30027  | -0.29003 | 1.99422  |
| S | -0.81916 | 0.33762  | -3.28112 |

**R = Mes**

|    |          |          |          |
|----|----------|----------|----------|
| P  | 0.85623  | -0.21373 | 1.36826  |
| C  | 0.51656  | -0.55655 | -0.20312 |
| P  | -1.01877 | -0.42720 | -1.07192 |
| Cl | 1.70914  | -2.53303 | -2.22995 |
| Si | 1.81014  | -0.43965 | -1.69088 |
| C  | -2.14796 | 0.71344  | -0.24251 |
| H  | -3.05460 | 0.85020  | -0.83100 |
| H  | -2.41850 | 0.29389  | 0.72998  |
| H  | -1.64687 | 1.67142  | -0.10179 |
| Au | -0.53979 | 0.07428  | 3.06290  |
| Cl | -1.98971 | 0.35244  | 4.78044  |
| C  | -1.98624 | -1.93632 | -1.37825 |
| C  | -1.85835 | -3.10377 | -0.59910 |
| C  | -2.93941 | -1.88955 | -2.41808 |
| C  | -2.67114 | -4.19122 | -0.89008 |
| C  | -3.72726 | -3.00989 | -2.65343 |
| C  | -3.60724 | -4.17401 | -1.91280 |
| H  | -2.56695 | -5.08507 | -0.28326 |
| H  | -4.46131 | -2.96245 | -3.45184 |
| C  | 2.63803  | -0.12178 | 1.61194  |
| C  | 3.37211  | -1.29121 | 1.85319  |
| C  | 3.25480  | 1.13849  | 1.62851  |
| C  | 4.73265  | -1.17289 | 2.10258  |
| C  | 4.61679  | 1.20163  | 1.88071  |
| C  | 5.37362  | 0.05948  | 2.11655  |
| H  | 5.30752  | -2.07346 | 2.29564  |
| H  | 5.10114  | 2.17325  | 1.89404  |
| C  | -0.89552 | -3.25815 | 0.53731  |
| H  | 0.13539  | -3.15940 | 0.19495  |
| H  | -1.06115 | -2.51809 | 1.32379  |
| H  | -1.01138 | -4.24460 | 0.98653  |
| C  | -3.16032 | -0.71847 | -3.33317 |
| H  | -3.10270 | 0.25224  | -2.84156 |
| H  | -2.41438 | -0.70532 | -4.13133 |
| H  | -4.14664 | -0.79524 | -3.79248 |
| C  | -4.44370 | -5.37735 | -2.21450 |
| H  | -5.36265 | -5.10452 | -2.73536 |
| H  | -3.89497 | -6.07383 | -2.85600 |
| H  | -4.70936 | -5.91570 | -1.30286 |
| C  | 6.84817  | 0.15517  | 2.35702  |
| H  | 7.10807  | 1.07911  | 2.87661  |
| H  | 7.21160  | -0.68722 | 2.94757  |
| H  | 7.39217  | 0.14997  | 1.40732  |
| C  | 2.72971  | -2.64430 | 1.83097  |
| H  | 1.78177  | -2.65462 | 2.37826  |
| H  | 2.52054  | -2.95946 | 0.80402  |
| H  | 3.38263  | -3.39126 | 2.28351  |
| C  | 2.48000  | 2.39002  | 1.35248  |
| H  | 2.16067  | 2.42541  | 0.30604  |
| H  | 1.58088  | 2.45723  | 1.97387  |
| H  | 3.08583  | 3.27520  | 1.54755  |
| S  | -0.17439 | 0.35263  | -2.73999 |

**R = Mes\***

|    |          |          |          |
|----|----------|----------|----------|
| P  | -1.15529 | 0.63875  | 0.08184  |
| C  | -0.35542 | -0.74806 | 0.47896  |
| P  | 1.34718  | -1.15834 | 0.79731  |
| Cl | -1.87650 | -3.08404 | -1.13439 |
| C  | 2.95917  | -0.52369 | 0.18642  |

|   |          |          |          |    |          |          |          |
|---|----------|----------|----------|----|----------|----------|----------|
| C | 3.50747  | -1.15811 | -0.96692 | H  | 4.82526  | 0.69494  | 3.64858  |
| C | 3.85194  | 0.10982  | 1.09480  | H  | 3.68661  | 1.97753  | 4.05198  |
| C | 4.85922  | -1.46826 | -0.94731 | H  | 3.12954  | 0.31110  | 3.91684  |
| C | 5.19215  | -0.26384 | 1.04954  | C  | 1.35580  | -0.89324 | -2.37018 |
| C | 5.70754  | -1.12807 | 0.09783  | H  | 1.02742  | -0.87674 | -3.41224 |
| H | 5.26898  | -1.99445 | -1.80009 | H  | 0.67496  | -1.55554 | -1.83830 |
| H | 5.86048  | 0.16491  | 1.78312  | H  | 1.25295  | 0.12366  | -1.98215 |
| C | -2.93376 | 0.26238  | 0.13528  | C  | 2.87984  | -2.80584 | -2.82288 |
| C | -3.66359 | 0.00326  | -1.05679 | H  | 2.32604  | -3.47865 | -2.16847 |
| C | -3.51948 | -0.01391 | 1.39650  | H  | 2.44136  | -2.86575 | -3.82249 |
| C | -4.83058 | -0.74208 | -0.94424 | H  | 3.90884  | -3.16380 | -2.89483 |
| C | -4.67505 | -0.78758 | 1.41179  | C  | 3.56805  | -0.45568 | -3.31226 |
| C | -5.31639 | -1.21880 | 0.26435  | H  | 3.53292  | 0.58930  | -2.99479 |
| H | -5.37095 | -0.98643 | -1.84345 | H  | 4.61496  | -0.74272 | -3.41809 |
| H | -5.09438 | -1.05782 | 2.37237  | H  | 3.09844  | -0.52651 | -4.29688 |
| C | -3.30362 | 0.57567  | -2.44147 | C  | 7.90975  | -1.14533 | 1.34756  |
| C | -3.10153 | 0.55250  | 2.77239  | H  | 8.00438  | -0.05694 | 1.38016  |
| C | -6.52473 | -2.14317 | 0.36346  | H  | 7.42766  | -1.47832 | 2.27020  |
| C | 3.53931  | 1.31931  | 2.00236  | H  | 8.92043  | -1.55975 | 1.33389  |
| C | 2.80334  | -1.36099 | -2.32318 | C  | 7.88236  | -1.09697 | -1.13319 |
| C | 7.15033  | -1.61622 | 0.11016  | H  | 7.41857  | -1.45058 | -2.05604 |
| C | -4.32214 | 1.30087  | 3.34256  | H  | 7.88924  | -0.00459 | -1.15691 |
| H | -4.06477 | 1.72596  | 4.31633  | H  | 8.91922  | -1.44391 | -1.12844 |
| H | -4.61994 | 2.11925  | 2.68249  | C  | 7.15133  | -3.14972 | 0.09685  |
| H | -5.18662 | 0.65261  | 3.48331  | H  | 6.64586  | -3.54974 | 0.97910  |
| C | -1.97549 | 1.58340  | 2.75563  | H  | 6.64633  | -3.54674 | -0.78585 |
| H | -0.99502 | 1.14308  | 2.57491  | H  | 8.17856  | -3.52414 | 0.09319  |
| H | -2.14756 | 2.37625  | 2.02285  | Au | -0.29111 | 2.60613  | -0.50676 |
| H | -1.92400 | 2.06187  | 3.73760  | Cl | 0.60840  | 4.60656  | -1.10591 |
| C | -2.71358 | -0.57404 | 3.73416  | C  | 1.44143  | -1.22833 | 2.61246  |
| H | -3.53326 | -1.27794 | 3.88858  | H  | 2.39468  | -1.68190 | 2.88613  |
| H | -1.86523 | -1.14488 | 3.35109  | H  | 1.31107  | -0.27586 | 3.11588  |
| H | -2.44462 | -0.15563 | 4.70835  | H  | 0.63516  | -1.90455 | 2.90615  |
| C | -7.63247 | -1.46479 | 1.17760  | Si | -1.07669 | -2.59124 | 0.79456  |
| H | -8.49930 | -2.12680 | 1.25556  | S  | 1.18791  | -3.12487 | 0.32472  |
| H | -7.30519 | -1.22691 | 2.19177  |    |          |          |          |
| H | -7.95588 | -0.53556 | 0.70191  |    |          |          |          |
| C | -7.09050 | -2.50749 | -1.00654 |    |          |          |          |
| H | -7.93428 | -3.19008 | -0.88065 |    |          |          |          |
| H | -7.45668 | -1.62935 | -1.54474 |    |          |          |          |
| H | -6.34767 | -3.01075 | -1.63008 |    |          |          |          |
| C | -6.09371 | -3.43699 | 1.06542  |    |          |          |          |
| H | -5.29952 | -3.93765 | 0.50696  |    |          |          |          |
| H | -5.72088 | -3.24487 | 2.07356  |    |          |          |          |
| H | -6.94308 | -4.12111 | 1.14619  |    |          |          |          |
| C | -4.30285 | 0.14762  | -3.52088 |    |          |          |          |
| H | -5.32107 | 0.47468  | -3.29924 |    |          |          |          |
| H | -4.01088 | 0.61398  | -4.46427 |    |          |          |          |
| H | -4.30510 | -0.93409 | -3.67554 |    |          |          |          |
| C | -3.37762 | 2.10637  | -2.35663 |    |          |          |          |
| H | -4.38043 | 2.42805  | -2.06469 |    |          |          |          |
| H | -2.67073 | 2.51748  | -1.63261 |    |          |          |          |
| H | -3.14513 | 2.54853  | -3.32906 |    |          |          |          |
| C | -1.92849 | 0.13703  | -2.94639 |    |          |          |          |
| H | -1.10530 | 0.53559  | -2.35122 |    |          |          |          |
| H | -1.83818 | -0.94961 | -2.96012 |    |          |          |          |
| H | -1.77820 | 0.51738  | -3.96078 |    |          |          |          |
| C | 2.15307  | 1.91316  | 1.78268  |    |          |          |          |
| H | 2.04227  | 2.24281  | 0.74820  |    |          |          |          |
| H | 1.32116  | 1.25086  | 2.00986  |    |          |          |          |
| H | 2.03066  | 2.79636  | 2.41395  |    |          |          |          |
| C | 4.50473  | 2.44290  | 1.56302  |    |          |          |          |
| H | 4.24796  | 3.36112  | 2.09753  |    |          |          |          |
| H | 5.54686  | 2.21044  | 1.78289  |    |          |          |          |
| H | 4.41438  | 2.64090  | 0.49320  |    |          |          |          |
| C | 3.80499  | 1.04922  | 3.48710  |    |          |          |          |

**Coordination through  $\pi(\text{C}=\text{P})$  bond****R = H**

|    |          |          |          |
|----|----------|----------|----------|
| P  | 0.62132  | 0.19639  | 1.02280  |
| C  | 0.33040  | -0.02028 | -0.66668 |
| P  | -1.20925 | -0.29468 | -1.48439 |
| Cl | 1.24811  | -2.70890 | -1.77816 |
| Si | 1.48243  | -0.61229 | -2.18398 |
| H  | 2.02842  | -0.05778 | 0.99057  |
| H  | -1.61649 | -1.59014 | -1.11035 |
| Au | 0.69914  | 2.09130  | -0.40997 |
| Cl | 0.97292  | 4.29482  | -0.76333 |
| C  | -2.61807 | 0.74585  | -1.07739 |
| H  | -3.47972 | 0.41266  | -1.66022 |
| H  | -2.84071 | 0.65649  | -0.01133 |
| H  | -2.38962 | 1.78317  | -1.32424 |
| S  | -0.59472 | -0.22027 | -3.38021 |

**R = Me**

|    |          |          |          |
|----|----------|----------|----------|
| P  | 0.62994  | 0.10033  | 1.04431  |
| C  | 0.28386  | 0.15215  | -0.64737 |
| P  | -1.28342 | -0.13799 | -1.41506 |
| Cl | 1.65928  | -2.21549 | -2.08788 |
| Si | 1.40378  | -0.07866 | -2.26966 |
| C  | -2.63586 | 0.96700  | -0.97173 |
| H  | -3.52531 | 0.67849  | -1.53673 |
| H  | -2.84158 | 0.88994  | 0.09839  |
| H  | -2.36641 | 1.99327  | -1.22132 |
| C  | 2.42987  | -0.24122 | 1.09923  |
| H  | 2.96691  | 0.11377  | 0.21801  |
| H  | 2.85219  | 0.20610  | 2.00070  |
| H  | 2.55026  | -1.32732 | 1.16506  |
| C  | -1.83431 | -1.79931 | -0.99536 |
| H  | -2.08472 | -1.84897 | 0.06688  |
| H  | -2.71022 | -2.04787 | -1.59763 |
| H  | -1.02481 | -2.49398 | -1.22301 |
| Au | 0.52998  | 2.21723  | -0.05647 |
| Cl | 0.68582  | 4.46343  | 0.02018  |
| S  | -0.72796 | 0.02126  | -3.33743 |

**R = *t*-Bu**

|    |          |          |          |
|----|----------|----------|----------|
| P  | 0.60044  | 0.24471  | 0.80602  |
| C  | 0.37444  | 0.09833  | -0.90896 |
| P  | -1.22705 | -0.27560 | -1.61386 |
| Cl | 2.24632  | -1.92492 | -2.56235 |
| Si | 1.41939  | 0.05951  | -2.59000 |
| C  | -2.48537 | 0.98957  | -1.32603 |
| H  | -3.42777 | 0.67995  | -1.78140 |
| H  | -2.62627 | 1.15254  | -0.25647 |
| H  | -2.15366 | 1.91653  | -1.79398 |
| Au | 0.55399  | 2.23291  | -0.50900 |
| Cl | 0.72754  | 4.48292  | -0.55325 |
| C  | 2.39942  | -0.02651 | 1.23548  |
| C  | 2.53593  | -1.54385 | 1.40242  |
| C  | 3.42082  | 0.49574  | 0.23896  |
| C  | 2.58518  | 0.66457  | 2.58835  |
| H  | 1.78704  | -1.95133 | 2.08900  |
| H  | 2.45266  | -2.05926 | 0.44340  |
| H  | 3.52081  | -1.76942 | 1.82442  |
| H  | 3.33613  | 1.57506  | 0.09559  |
| H  | 4.42848  | 0.28805  | 0.61575  |
| H  | 3.33975  | 0.00689  | -0.73385 |
| H  | 3.58827  | 0.45148  | 2.96963  |
| H  | 2.48182  | 1.74929  | 2.50354  |
| H  | 1.86307  | 0.31137  | 3.32966  |

|   |          |          |          |
|---|----------|----------|----------|
| C | -1.93728 | -1.88095 | -1.00999 |
| C | -3.05870 | -2.27815 | -1.97135 |
| C | -0.84994 | -2.95029 | -1.02445 |
| C | -2.49328 | -1.70242 | 0.40216  |
| H | -3.87852 | -1.55638 | -1.98130 |
| H | -2.68967 | -2.40207 | -2.99091 |
| H | -3.47121 | -3.23581 | -1.64182 |
| H | -0.04796 | -2.72872 | -0.31886 |
| H | -1.29830 | -3.90549 | -0.73672 |
| H | -0.40466 | -3.06502 | -2.01360 |
| H | -2.83882 | -2.67536 | 0.76313  |
| H | -1.73766 | -1.33946 | 1.10277  |
| H | -3.34634 | -1.02168 | 0.42813  |
| S | -0.70424 | -0.36628 | -3.55758 |

**R = Ph**

|    |          |          |          |
|----|----------|----------|----------|
| P  | 0.77923  | -0.16379 | 0.87286  |
| C  | 0.40685  | -0.13949 | -0.73132 |
| P  | -1.23761 | -0.12531 | -1.36905 |
| Cl | 1.82974  | -1.85524 | -2.95145 |
| Si | 1.38653  | 0.18155  | -2.40226 |
| C  | -2.32287 | 1.09874  | -0.61638 |
| H  | -3.27619 | 1.09028  | -1.14856 |
| H  | -2.48695 | 0.89067  | 0.44245  |
| H  | -1.85183 | 2.07603  | -0.72465 |
| Au | -0.66435 | -0.05733 | 2.55257  |
| Cl | -2.23475 | 0.03110  | 4.18381  |
| C  | -2.03241 | -1.73310 | -1.19466 |
| C  | -2.76860 | -2.03564 | -0.04873 |
| C  | -1.86646 | -2.69063 | -2.19157 |
| C  | -3.33912 | -3.29010 | 0.09005  |
| H  | -2.89803 | -1.30824 | 0.74438  |
| C  | -2.43995 | -3.94310 | -2.04351 |
| H  | -1.28826 | -2.45078 | -3.07611 |
| C  | -3.17589 | -4.24228 | -0.90633 |
| H  | -3.91109 | -3.52122 | 0.98081  |
| H  | -2.30985 | -4.68700 | -2.82058 |
| H  | -3.62446 | -5.22275 | -0.79428 |
| C  | 2.52812  | -0.25754 | 1.18376  |
| C  | 3.44327  | -0.71311 | 0.23029  |
| C  | 2.98015  | 0.16391  | 2.43825  |
| C  | 4.79498  | -0.71876 | 0.52768  |
| H  | 3.10091  | -1.10109 | -0.72157 |
| C  | 4.33319  | 0.15646  | 2.72423  |
| H  | 2.26599  | 0.50157  | 3.18235  |
| C  | 5.24023  | -0.28042 | 1.76758  |
| H  | 5.50274  | -1.07619 | -0.21078 |
| H  | 4.68104  | 0.48859  | 3.69513  |
| H  | 6.30027  | -0.29003 | 1.99422  |
| S  | -0.81916 | 0.33762  | -3.28112 |

**R = Mes**

|    |          |          |          |
|----|----------|----------|----------|
| P  | 0.64723  | 0.02295  | 1.13559  |
| C  | -0.00722 | 0.37778  | -0.45758 |
| P  | -1.72726 | 0.01203  | -0.78076 |
| Cl | 1.52628  | 0.76761  | -3.45157 |
| Si | 0.22700  | 1.53392  | -1.99213 |
| C  | -2.90719 | 0.90017  | 0.26733  |
| H  | -3.92164 | 0.54468  | 0.07882  |
| H  | -2.66481 | 0.82152  | 1.32371  |
| H  | -2.83118 | 1.94283  | -0.04332 |
| Au | 0.29859  | 2.35544  | 0.37255  |
| Cl | 0.72891  | 4.34701  | 1.40808  |
| C  | 2.44865  | -0.18932 | 0.97009  |
| C  | 3.27169  | 0.47042  | 1.90339  |
| C  | 3.01382  | -1.10699 | 0.06451  |



|                 |          |          |          |   |          |          |          |
|-----------------|----------|----------|----------|---|----------|----------|----------|
| C               | 4.64463  | 0.26442  | 1.85264  | H | 1.33635  | 2.71001  | 4.06140  |
| C               | 4.39086  | -1.28095 | 0.06137  | H | 0.70251  | 2.40989  | 2.45642  |
| C               | 5.22822  | -0.59065 | 0.92906  | H | 1.18145  | 1.04996  | 3.49639  |
| H               | 5.27444  | 0.78581  | 2.56743  | C | 3.00449  | -3.37706 | -0.48891 |
| H               | 4.82207  | -1.99433 | -0.63517 | H | 2.52511  | -2.90890 | -1.34646 |
| C               | -2.05308 | -1.78001 | -0.76448 | H | 4.06998  | -3.45813 | -0.70955 |
| C               | -1.74633 | -2.57764 | -1.89105 | H | 2.61726  | -4.39451 | -0.38206 |
| C               | -2.61008 | -2.39292 | 0.38379  | C | 3.54523  | -3.24014 | 1.93999  |
| C               | -2.11668 | -3.91760 | -1.88063 | H | 4.61725  | -3.22893 | 1.73876  |
| C               | -2.95173 | -3.73758 | 0.32625  | H | 3.37576  | -2.71665 | 2.88432  |
| C               | -2.74848 | -4.51473 | -0.80324 | H | 3.23295  | -4.28142 | 2.06429  |
| H               | -1.87887 | -4.51775 | -2.75321 | C | 1.27557  | -2.74694 | 1.17430  |
| H               | -3.37550 | -4.19623 | 1.21409  | H | 1.03514  | -2.22907 | 2.10741  |
| C               | 2.71825  | 1.39170  | 2.94755  | H | 0.60104  | -2.39866 | 0.39304  |
| H               | 2.42699  | 2.35886  | 2.52636  | H | 1.06193  | -3.80805 | 1.33307  |
| H               | 1.82410  | 0.97907  | 3.42395  | C | 7.28925  | 1.72404  | 0.26192  |
| H               | 3.46121  | 1.57331  | 3.72546  | H | 6.68550  | 2.50753  | -0.20241 |
| C               | 2.18741  | -1.94236 | -0.86699 | H | 7.37331  | 1.94062  | 1.33014  |
| H               | 1.28646  | -2.32500 | -0.38031 | C | 8.29392  | 1.78288  | -0.16371 |
| H               | 1.86801  | -1.36908 | -1.73904 | C | 6.71000  | 0.08593  | -1.50868 |
| H               | 2.76829  | -2.79495 | -1.22238 | H | 7.72750  | 0.16675  | -1.90181 |
| C               | 6.71390  | -0.76669 | 0.86884  | H | 6.33069  | -0.90802 | -1.75382 |
| H               | 7.17815  | -0.57371 | 1.83757  | H | 6.08207  | 0.81373  | -2.02731 |
| H               | 6.98394  | -1.77590 | 0.55181  | C | 7.60667  | -0.69793 | 0.69162  |
| H               | 7.15588  | -0.06981 | 0.14956  | H | 7.61920  | -0.54844 | 1.77424  |
| C               | -2.81213 | -1.72633 | 1.71662  | H | 7.27371  | -1.71939 | 0.49664  |
| H               | -2.91771 | -2.49317 | 2.48399  | H | 8.63252  | -0.60769 | 0.32341  |
| H               | -1.96215 | -1.10384 | 2.00165  | C | -2.37551 | -1.46087 | -1.68143 |
| H               | -3.71772 | -1.11774 | 1.74781  | C | -2.36836 | -2.34272 | -2.80254 |
| C               | -0.99917 | -2.11722 | -3.10850 | C | -3.60305 | -1.29410 | -0.98131 |
| H               | -1.65685 | -1.63188 | -3.83125 | C | -3.58754 | -2.63394 | -3.39944 |
| H               | -0.20213 | -1.41311 | -2.87935 | C | -1.18047 | -3.19460 | -3.28986 |
| H               | -0.54789 | -2.98347 | -3.59455 | C | -4.78235 | -1.64444 | -1.63166 |
| C               | -3.17481 | -5.94756 | -0.84631 | C | -3.76045 | -0.95140 | 0.51307  |
| H               | -2.55662 | -6.52739 | -1.53330 | C | -4.81007 | -2.21597 | -2.89343 |
| H               | -3.12336 | -6.40922 | 0.14121  | H | -3.57487 | -3.24551 | -4.29302 |
| H               | -4.21075 | -6.02701 | -1.19057 | C | -0.84910 | -2.99772 | -4.77076 |
| S               | -1.90078 | 0.88781  | -2.61537 | C | -1.62073 | -4.66214 | -3.09326 |
|                 |          |          |          | C | 0.06943  | -3.03505 | -2.44129 |
|                 |          |          |          | H | -5.71563 | -1.46796 | -1.11522 |
|                 |          |          |          | C | -2.45264 | -0.65714 | 1.22818  |
|                 |          |          |          | C | -4.30920 | -2.23864 | 1.16403  |
|                 |          |          |          | C | -4.76132 | 0.17675  | 0.78138  |
|                 |          |          |          | C | -6.09801 | -2.48346 | -3.66104 |
|                 |          |          |          | H | -0.09505 | -3.72951 | -5.07230 |
|                 |          |          |          | H | -1.72571 | -3.14793 | -5.40489 |
|                 |          |          |          | H | -0.45249 | -2.00300 | -4.96457 |
|                 |          |          |          | H | -2.45295 | -4.94258 | -3.73982 |
|                 |          |          |          | H | -0.77882 | -5.31816 | -3.32991 |
|                 |          |          |          | H | -1.91695 | -4.84964 | -2.05823 |
|                 |          |          |          | H | 0.52570  | -2.05159 | -2.51952 |
|                 |          |          |          | H | -0.14643 | -3.25361 | -1.39375 |
|                 |          |          |          | H | 0.82174  | -3.75233 | -2.77690 |
|                 |          |          |          | H | -1.71347 | -1.43894 | 1.04430  |
|                 |          |          |          | H | -2.00901 | 0.30313  | 0.97044  |
|                 |          |          |          | H | -2.62432 | -0.62297 | 2.30666  |
|                 |          |          |          | H | -4.41376 | -2.08323 | 2.24129  |
|                 |          |          |          | H | -5.28512 | -2.51752 | 0.76529  |
|                 |          |          |          | H | -3.62669 | -3.07680 | 1.00517  |
|                 |          |          |          | H | -5.75543 | -0.05566 | 0.39613  |
|                 |          |          |          | H | -4.85723 | 0.32686  | 1.85970  |
|                 |          |          |          | H | -4.45151 | 1.12552  | 0.34193  |
|                 |          |          |          | C | -7.32488 | -1.92900 | -2.94201 |
|                 |          |          |          | C | -6.28610 | -3.99432 | -3.84417 |
|                 |          |          |          | C | -5.99951 | -1.81375 | -5.03696 |
|                 |          |          |          | H | -7.49195 | -2.41962 | -1.97968 |
| <b>R = Mes*</b> |          |          |          |   |          |          |          |
| P               | 0.70412  | 0.14367  | 0.96509  |   |          |          |          |
| C               | 0.45160  | 0.12109  | -0.77629 |   |          |          |          |
| P               | -1.15583 | -0.05873 | -1.65541 |   |          |          |          |
| Cl              | 2.86008  | -0.72001 | -3.01614 |   |          |          |          |
| Au              | 0.53569  | 2.25375  | -0.28609 |   |          |          |          |
| Cl              | 0.31369  | 4.51416  | -0.03763 |   |          |          |          |
| C               | 2.54089  | 0.01309  | 1.15384  |   |          |          |          |
| C               | 3.24964  | -1.13542 | 0.70769  |   |          |          |          |
| C               | 3.29372  | 1.12701  | 1.60960  |   |          |          |          |
| C               | 4.58691  | -0.98999 | 0.37213  |   |          |          |          |
| C               | 4.62985  | 1.20800  | 1.21502  |   |          |          |          |
| C               | 5.27934  | 0.20523  | 0.51804  |   |          |          |          |
| H               | 5.11640  | -1.85414 | -0.00906 |   |          |          |          |
| H               | 5.18465  | 2.09243  | 1.49425  |   |          |          |          |
| C               | 2.87408  | 2.16323  | 2.67634  |   |          |          |          |
| C               | 2.74353  | -2.58885 | 0.79640  |   |          |          |          |
| C               | 6.70799  | 0.33653  | 0.00412  |   |          |          |          |
| C               | 3.76494  | 1.86073  | 3.89966  |   |          |          |          |
| H               | 3.59865  | 0.84327  | 4.26337  |   |          |          |          |
| H               | 4.82596  | 1.96589  | 3.67035  |   |          |          |          |
| H               | 3.52202  | 2.55663  | 4.70749  |   |          |          |          |
| C               | 3.13581  | 3.60420  | 2.23011  |   |          |          |          |
| H               | 2.53748  | 3.87535  | 1.36025  |   |          |          |          |
| H               | 2.86899  | 4.28882  | 3.04001  |   |          |          |          |
| H               | 4.18645  | 3.77767  | 1.99184  |   |          |          |          |
| C               | 1.43800  | 2.06564  | 3.18370  |   |          |          |          |

|    |          |          |          |
|----|----------|----------|----------|
| H  | -7.24288 | -0.85262 | -2.77141 |
| H  | -8.21381 | -2.10077 | -3.55326 |
| H  | -5.46416 | -4.44136 | -4.40664 |
| H  | -6.34867 | -4.50174 | -2.87841 |
| H  | -7.21079 | -4.19226 | -4.39298 |
| H  | -5.88016 | -0.73206 | -4.93897 |
| H  | -5.15215 | -2.19278 | -5.61161 |
| H  | -6.90861 | -2.00504 | -5.61333 |
| Si | 1.50835  | 0.77480  | -2.31340 |
| S  | -0.40203 | 0.22919  | -3.52138 |
| C  | -2.26746 | 1.37022  | -1.45765 |
| H  | -2.62817 | 1.51125  | -0.44360 |
| H  | -1.71751 | 2.25669  | -1.77425 |
| H  | -3.10960 | 1.21400  | -2.13423 |

|    |          |          |          |
|----|----------|----------|----------|
| C  | 2.13092  | 2.43163  | 1.04761  |
| C  | 2.59496  | 0.04831  | 1.66285  |
| H  | 3.27545  | -0.11756 | -1.01817 |
| H  | 2.97715  | 1.58774  | -1.42912 |
| H  | 4.20801  | 1.16339  | -0.24902 |
| H  | 1.39861  | 2.53316  | 1.85354  |
| H  | 3.10773  | 2.72037  | 1.44801  |
| H  | 1.87150  | 3.13883  | 0.25634  |
| H  | 3.56925  | 0.34605  | 2.06275  |
| H  | 1.87404  | 0.08356  | 2.48451  |
| H  | 2.67573  | -0.98649 | 1.32101  |
| C  | -2.01299 | -1.79915 | -1.87551 |
| C  | -3.07656 | -2.07920 | -2.93897 |
| C  | -0.99165 | -2.93955 | -1.83684 |
| C  | -2.64504 | -1.59564 | -0.50140 |
| H  | -3.83316 | -1.29404 | -2.97688 |
| H  | -2.63490 | -2.18868 | -3.93107 |
| H  | -3.57660 | -3.01764 | -2.68468 |
| H  | -0.21451 | -2.76899 | -1.09001 |
| H  | -1.52032 | -3.85909 | -1.57219 |
| H  | -0.50897 | -3.08902 | -2.80337 |
| H  | -3.13327 | -2.52773 | -0.20464 |
| H  | -1.90050 | -1.35351 | 0.26093  |
| H  | -3.39981 | -0.80811 | -0.51107 |
| Cl | -2.45763 | 1.19144  | -2.36947 |

## PCPX-E(II)-AuCl model systems

E = Ge(II)

[R-P=C(Ge(II)Cl)-P(O)ClR](AuCl)

Coordination through Ge(II) atom

R = H

|    |          |          |          |
|----|----------|----------|----------|
| P  | 0.49593  | 0.37629  | 0.47512  |
| C  | 0.10649  | 0.28291  | -1.13263 |
| P  | -1.43497 | -0.00849 | -1.90287 |
| Ge | 0.89471  | 0.67379  | -2.96703 |
| Cl | 1.52944  | -1.31599 | -3.55201 |
| O  | -1.08636 | 0.42819  | -3.32311 |
| Au | 1.90229  | 2.65137  | -3.65924 |
| Cl | 2.88750  | 4.60344  | -4.26329 |
| H  | 1.87506  | 0.70748  | 0.30856  |
| H  | -1.88686 | -1.33664 | -1.84821 |
| Cl | -2.98868 | 0.97375  | -1.14308 |

R = Me

|    |          |          |          |
|----|----------|----------|----------|
| P  | 0.54375  | 0.37472  | 0.45453  |
| C  | 0.12537  | 0.26610  | -1.14339 |
| P  | -1.42167 | -0.06077 | -1.88376 |
| Ge | 0.86004  | 0.67209  | -2.98343 |
| Cl | 1.55327  | -1.30268 | -3.60086 |
| O  | -1.08533 | 0.38798  | -3.31469 |
| C  | -1.98499 | -1.75093 | -1.82496 |
| H  | -2.21006 | -2.03541 | -0.79639 |
| H  | -2.87718 | -1.85246 | -2.44529 |
| H  | -1.18134 | -2.37374 | -2.22406 |
| C  | 2.32440  | 0.78963  | 0.40819  |
| H  | 2.89420  | -0.14519 | 0.38639  |
| H  | 2.59436  | 1.38776  | -0.46403 |
| H  | 2.59427  | 1.32185  | 1.32177  |
| Au | 1.87845  | 2.64754  | -3.67856 |
| Cl | 2.89271  | 4.59647  | -4.25876 |
| Cl | -2.94005 | 1.01039  | -1.13490 |

R = t-Bu

|    |          |          |          |
|----|----------|----------|----------|
| P  | 0.45371  | 0.54781  | 0.09602  |
| C  | 0.36071  | 0.16846  | -1.51495 |
| P  | -1.10133 | -0.29805 | -2.37643 |
| Ge | 1.35454  | 0.11046  | -3.28660 |
| Cl | 2.28296  | -1.86353 | -3.26017 |
| O  | -0.48989 | -0.43697 | -3.78223 |
| Au | 2.27711  | 1.90667  | -4.45464 |
| Cl | 3.16188  | 3.70776  | -5.52806 |
| C  | 2.21043  | 0.99396  | 0.51922  |
| C  | 3.21153  | 0.89626  | -0.61568 |

R = Ph

|    |          |          |          |
|----|----------|----------|----------|
| P  | 0.66627  | 0.40142  | 0.27965  |
| C  | 0.22445  | 0.18329  | -1.30685 |
| P  | -1.37382 | -0.14504 | -1.93219 |
| Ge | 0.83790  | 0.55903  | -3.19097 |
| Cl | 1.58312  | -1.38479 | -3.86669 |
| O  | -1.10693 | 0.18538  | -3.40962 |
| Au | 1.72748  | 2.54565  | -4.02355 |
| Cl | 2.62382  | 4.49566  | -4.77989 |
| C  | 2.42372  | 0.76740  | 0.25647  |
| C  | 2.90165  | 1.47586  | 1.36452  |
| C  | 3.31625  | 0.39694  | -0.75455 |
| C  | 4.23249  | 1.85089  | 1.43565  |
| H  | 2.21869  | 1.74584  | 2.16411  |
| C  | 4.64679  | 0.76260  | -0.67348 |
| H  | 2.97986  | -0.20978 | -1.58781 |
| C  | 5.10286  | 1.49755  | 0.41481  |
| H  | 4.59157  | 2.41630  | 2.28740  |
| H  | 5.33276  | 0.47491  | -1.46127 |
| H  | 6.14583  | 1.78755  | 0.46938  |
| C  | -2.02604 | -1.79119 | -1.73628 |
| C  | -1.85321 | -2.68943 | -2.78759 |
| C  | -2.63264 | -2.19696 | -0.54820 |
| C  | -2.29808 | -3.99447 | -2.64599 |
| H  | -1.37674 | -2.36547 | -3.70458 |
| C  | -3.06657 | -3.50352 | -0.41669 |
| H  | -2.77248 | -1.49491 | 0.26579  |
| C  | -2.90050 | -4.40020 | -1.46504 |
| H  | -2.17207 | -4.69454 | -3.46317 |
| H  | -3.54088 | -3.82306 | 0.50351  |
| H  | -3.24623 | -5.42204 | -1.35899 |
| Cl | -2.77032 | 1.07030  | -1.15379 |

R = Mes

|    |          |          |          |
|----|----------|----------|----------|
| P  | 0.75031  | 0.19211  | 0.74825  |
| C  | 0.19021  | 0.05019  | -0.80791 |
| P  | -1.39146 | -0.18457 | -1.53829 |
| Ge | 0.86291  | 0.77259  | -2.55927 |
| Cl | 1.54326  | -1.02246 | -3.61042 |
| O  | -1.08770 | 0.53488  | -2.86495 |

|    |          |          |          |   |          |          |          |
|----|----------|----------|----------|---|----------|----------|----------|
| Au | 1.82508  | 2.86284  | -2.94561 | C | -2.03889 | 4.01711  | -0.20955 |
| Cl | 2.78704  | 4.91458  | -3.19906 | C | -2.83060 | 0.00194  | 2.88538  |
| C  | 2.46602  | 0.73515  | 0.48764  | C | -5.92601 | 0.83805  | -0.99393 |
| C  | 2.77492  | 2.08637  | 0.70574  | C | 4.00055  | 0.89436  | 2.63521  |
| C  | 3.46709  | -0.18402 | 0.14265  | C | 3.40030  | 1.11282  | -2.47159 |
| C  | 4.08437  | 2.50700  | 0.52788  | C | 7.54841  | -0.84402 | -0.47279 |
| C  | 4.76506  | 0.28461  | -0.01505 | C | -3.91395 | -1.04133 | 3.17305  |
| C  | 5.09177  | 1.62455  | 0.15654  | H | -3.72453 | -1.47984 | 4.15531  |
| H  | 4.31989  | 3.55737  | 0.66908  | H | -4.91238 | -0.60024 | 3.20451  |
| H  | 5.54610  | -0.42183 | -0.27996 | H | -3.90802 | -1.85403 | 2.44204  |
| C  | -2.01075 | -1.84871 | -1.74611 | C | -2.93083 | 1.08841  | 3.96803  |
| C  | -2.41028 | -2.32066 | -3.01713 | H | -2.14603 | 1.84231  | 3.85731  |
| C  | -2.09021 | -2.68567 | -0.61418 | H | -3.89538 | 1.59940  | 3.92243  |
| C  | -2.84508 | -3.63635 | -3.10964 | H | -2.82676 | 0.63916  | 4.95986  |
| C  | -2.53615 | -3.98844 | -0.77745 | C | -1.48905 | -0.71520 | 3.04656  |
| C  | -2.90679 | -4.48954 | -2.01663 | H | -1.29306 | -1.40935 | 2.22704  |
| H  | -3.15825 | -4.00293 | -4.08190 | H | -0.64291 | -0.02593 | 3.12271  |
| H  | -2.60088 | -4.62751 | 0.09751  | H | -1.50304 | -1.28551 | 3.97922  |
| C  | -2.41548 | -1.50631 | -4.27750 | C | -7.12016 | 0.78407  | -0.03372 |
| H  | -2.93872 | -0.55738 | -4.15941 | H | -8.02522 | 0.50403  | -0.57962 |
| H  | -1.40160 | -1.26869 | -4.60337 | H | -6.97309 | 0.04811  | 0.75878  |
| H  | -2.90587 | -2.07177 | -5.06982 | H | -7.29230 | 1.75675  | 0.43461  |
| C  | -1.70430 | -2.24857 | 0.76586  | C | -6.25786 | 1.82160  | -2.11289 |
| H  | -0.62110 | -2.30378 | 0.90620  | H | -7.15361 | 1.48311  | -2.63891 |
| H  | -2.01044 | -1.22714 | 0.99670  | H | -6.46129 | 2.82534  | -1.72964 |
| H  | -2.16346 | -2.90262 | 1.50765  | H | -5.45070 | 1.88792  | -2.84666 |
| C  | -3.35087 | -5.90905 | -2.17434 | C | -5.70960 | -0.54755 | -1.61567 |
| H  | -2.50096 | -6.54630 | -2.43809 | H | -4.87551 | -0.53246 | -2.32139 |
| H  | -3.77873 | -6.29913 | -1.24969 | H | -5.49020 | -1.30740 | -0.86311 |
| H  | -4.09134 | -6.00887 | -2.96960 | H | -6.60769 | -0.85933 | -2.15640 |
| C  | 3.17138  | -1.64268 | -0.04844 | C | -2.90022 | 4.89022  | -1.12593 |
| H  | 2.54523  | -2.03783 | 0.75831  | H | -3.89843 | 5.05809  | -0.71593 |
| H  | 2.64407  | -1.82673 | -0.98862 | H | -2.41922 | 5.86506  | -1.23395 |
| H  | 4.09447  | -2.22329 | -0.06537 | H | -3.00116 | 4.46307  | -2.12635 |
| C  | 1.71040  | 3.07683  | 1.06845  | C | -1.88427 | 4.78042  | 1.11330  |
| H  | 1.15808  | 3.39731  | 0.17924  | H | -2.85308 | 4.91985  | 1.59848  |
| H  | 0.98342  | 2.65808  | 1.77396  | H | -1.22852 | 4.26224  | 1.81788  |
| H  | 2.14249  | 3.96882  | 1.52314  | H | -1.44843 | 5.76616  | 0.92718  |
| C  | 6.48747  | 2.11556  | -0.07065 | C | -0.67146 | 3.89347  | -0.88713 |
| H  | 6.55137  | 2.65248  | -1.02176 | H | 0.09148  | 3.47828  | -0.22445 |
| H  | 6.79689  | 2.81017  | 0.71328  | H | -0.72017 | 3.25985  | -1.77388 |
| H  | 7.20152  | 1.29155  | -0.10287 | H | -0.32240 | 4.88658  | -1.18474 |
| Cl | -2.84859 | 0.84840  | -0.59201 | C | 2.59314  | 1.44810  | 2.80424  |
|    |          |          |          | H | 2.34800  | 2.17105  | 2.02227  |
|    |          |          |          | H | 1.82914  | 0.67247  | 2.83005  |
|    |          |          |          | H | 2.52448  | 1.97637  | 3.75806  |
|    |          |          |          | C | 4.95004  | 2.08863  | 2.86478  |
|    |          |          |          | H | 4.74982  | 2.52374  | 3.84752  |
|    |          |          |          | H | 5.99974  | 1.79547  | 2.83453  |
|    |          |          |          | H | 4.79357  | 2.86396  | 2.11090  |
|    |          |          |          | C | 4.26764  | -0.15251 | 3.71993  |
|    |          |          |          | H | 5.29778  | -0.51202 | 3.69728  |
|    |          |          |          | H | 4.09756  | 0.29236  | 4.70389  |
|    |          |          |          | H | 3.60685  | -1.01317 | 3.61951  |
|    |          |          |          | C | 2.23273  | 2.03078  | -2.11955 |
|    |          |          |          | H | 1.87487  | 2.52548  | -3.02534 |
|    |          |          |          | H | 1.36976  | 1.51480  | -1.70789 |
|    |          |          |          | H | 2.54721  | 2.80555  | -1.41520 |
|    |          |          |          | C | 2.99802  | 0.06569  | -3.51418 |
|    |          |          |          | H | 2.21284  | -0.59174 | -3.15092 |
|    |          |          |          | H | 2.63916  | 0.56792  | -4.41644 |
|    |          |          |          | H | 3.85866  | -0.54767 | -3.79349 |
|    |          |          |          | C | 4.44920  | 2.03686  | -3.12342 |
|    |          |          |          | H | 4.85895  | 2.75013  | -2.40437 |
|    |          |          |          | H | 5.27757  | 1.49047  | -3.57533 |
|    |          |          |          | H | 3.96463  | 2.60159  | -3.92356 |

  

| R = Mes* |          |          |          |
|----------|----------|----------|----------|
| P        | -0.44970 | 1.78621  | 1.50716  |
| C        | 0.17918  | 0.65416  | 0.46076  |
| P        | 1.74594  | -0.12584 | 0.20883  |
| Cl       | -0.97977 | 0.54918  | -2.72339 |
| O        | 1.34806  | -0.87819 | -1.07950 |
| C        | 3.46082  | 0.44993  | 0.08846  |
| C        | 4.04003  | 0.48963  | -1.21581 |
| C        | 4.31935  | 0.38506  | 1.21690  |
| C        | 5.35375  | 0.06443  | -1.33497 |
| C        | 5.63438  | -0.01323 | 1.00618  |
| C        | 6.14941  | -0.28482 | -0.25077 |
| H        | 5.78257  | 0.02388  | -2.32738 |
| H        | 6.27878  | -0.10756 | 1.86885  |
| C        | -2.21860 | 1.73702  | 1.03111  |
| C        | -2.71155 | 2.65987  | 0.08261  |
| C        | -3.05722 | 0.70617  | 1.53008  |
| C        | -3.92232 | 2.36058  | -0.53923 |
| C        | -4.24190 | 0.46561  | 0.84709  |
| C        | -4.66517 | 1.23221  | -0.23234 |
| H        | -4.28931 | 3.02751  | -1.30279 |
| H        | -4.86256 | -0.35903 | 1.16412  |

|    |          |          |          |
|----|----------|----------|----------|
| C  | 8.25126  | -1.18099 | 0.83948  |
| H  | 8.42255  | -0.29236 | 1.45245  |
| H  | 7.68311  | -1.90438 | 1.42955  |
| H  | 9.22760  | -1.62186 | 0.62607  |
| C  | 8.40063  | 0.18209  | -1.22944 |
| H  | 7.97731  | 0.42249  | -2.20653 |
| H  | 8.49001  | 1.11227  | -0.66295 |
| H  | 9.40618  | -0.21524 | -1.39129 |
| C  | 7.43778  | -2.12710 | -1.30560 |
| H  | 6.84294  | -2.88191 | -0.78599 |
| H  | 6.97089  | -1.94222 | -2.27496 |
| H  | 8.43280  | -2.54219 | -1.48653 |
| Ge | -0.61327 | -0.59861 | -0.90441 |
| Au | -2.01248 | -2.41514 | -0.44789 |
| Cl | -3.47523 | -4.08183 | 0.11750  |
| Cl | 1.87201  | -1.60622 | 1.60276  |

#### Coordination through O atom

##### R = H

|    |          |          |          |
|----|----------|----------|----------|
| P  | 0.51603  | 0.18548  | 0.69503  |
| C  | 0.28631  | 0.28298  | -0.94351 |
| P  | -1.21534 | 0.36274  | -1.80128 |
| Ge | 1.43002  | 0.67859  | -2.64760 |
| Cl | 1.31938  | -1.39576 | -3.41232 |
| O  | -0.76372 | 1.09048  | -3.07636 |
| Au | -2.00204 | 1.37387  | -4.76627 |
| Cl | -3.31568 | 1.66448  | -6.53186 |
| H  | -1.76368 | -0.89376 | -2.09474 |
| H  | 1.94713  | 0.21213  | 0.68662  |
| Cl | -2.72826 | 1.28323  | -0.89235 |

##### R = Me

|    |          |          |          |
|----|----------|----------|----------|
| P  | 0.53705  | 0.13118  | 0.68073  |
| C  | 0.28486  | 0.28691  | -0.94799 |
| P  | -1.23693 | 0.31848  | -1.77141 |
| Ge | 1.35673  | 0.80889  | -2.66094 |
| Cl | 1.51287  | -1.26447 | -3.45942 |
| O  | -0.78853 | 1.00893  | -3.08332 |
| C  | -1.97736 | -1.27147 | -2.08044 |
| H  | -2.28162 | -1.72300 | -1.13507 |
| H  | -2.84233 | -1.14189 | -2.73407 |
| H  | -1.22293 | -1.88896 | -2.57334 |
| C  | 2.36407  | 0.13447  | 0.84262  |
| H  | 2.71575  | -0.90016 | 0.77664  |
| H  | 2.85867  | 0.72106  | 0.06660  |
| H  | 2.64042  | 0.51632  | 1.82695  |
| Au | -2.00841 | 1.27863  | -4.78313 |
| Cl | -3.31114 | 1.55154  | -6.56163 |
| Cl | -2.67272 | 1.40004  | -0.88255 |

##### R = *t*-Bu

|    |          |          |          |
|----|----------|----------|----------|
| P  | 0.69040  | -0.35016 | 0.45049  |
| C  | 0.24924  | 0.30937  | -1.00637 |
| P  | -1.36248 | 0.19794  | -1.66835 |
| Ge | 0.92407  | 1.62430  | -2.49424 |
| Cl | 1.79223  | 0.07317  | -3.84086 |
| O  | -1.17962 | 1.12463  | -2.89530 |
| Au | -2.56330 | 1.91781  | -4.27225 |
| Cl | -4.00761 | 2.76178  | -5.73548 |
| C  | -2.02315 | -1.45037 | -2.11654 |
| C  | -3.40413 | -1.29648 | -2.75488 |
| C  | -1.04032 | -2.06151 | -3.11867 |
| C  | -2.11160 | -2.30971 | -0.85666 |
| H  | -4.13472 | -0.88249 | -2.05886 |

|    |          |          |          |
|----|----------|----------|----------|
| H  | -3.38043 | -0.66675 | -3.64708 |
| H  | -3.74822 | -2.29010 | -3.05487 |
| H  | -0.03785 | -2.17049 | -2.70183 |
| H  | -1.40830 | -3.05508 | -3.38797 |
| H  | -0.96580 | -1.46763 | -4.03039 |
| H  | -2.47356 | -3.29975 | -1.14639 |
| H  | -1.14057 | -2.43843 | -0.37388 |
| H  | -2.81069 | -1.89721 | -0.12723 |
| C  | 2.50034  | 0.00348  | 0.73477  |
| C  | 3.19186  | -1.36174 | 0.64564  |
| C  | 3.13476  | 0.98495  | -0.23234 |
| C  | 2.58954  | 0.53089  | 2.17028  |
| H  | 2.73430  | -2.09607 | 1.31472  |
| H  | 3.16545  | -1.75958 | -0.37150 |
| H  | 4.24107  | -1.25594 | 0.94029  |
| H  | 2.63724  | 1.95854  | -0.20841 |
| H  | 4.18200  | 1.15294  | 0.04092  |
| H  | 3.13375  | 0.59988  | -1.25603 |
| H  | 3.64075  | 0.63539  | 2.45620  |
| H  | 2.11573  | 1.51063  | 2.27164  |
| H  | 2.11605  | -0.14934 | 2.88334  |
| Cl | -2.73425 | 1.01677  | -0.43752 |

##### R = Ph

|    |          |          |          |
|----|----------|----------|----------|
| P  | 0.51662  | -0.26952 | 0.76271  |
| C  | 0.22802  | 0.10184  | -0.83089 |
| P  | -1.31794 | 0.13871  | -1.60938 |
| Ge | 1.18031  | 1.21276  | -2.30276 |
| Cl | 1.72860  | -0.45334 | -3.68439 |
| O  | -0.98779 | 1.10696  | -2.76719 |
| Au | -2.27785 | 1.83990  | -4.26547 |
| Cl | -3.62225 | 2.61638  | -5.85618 |
| C  | -1.95383 | -1.41557 | -2.20368 |
| C  | -2.63892 | -2.27785 | -1.34802 |
| C  | -1.70090 | -1.78060 | -3.52452 |
| C  | -3.07261 | -3.50329 | -1.81934 |
| H  | -2.84152 | -1.98974 | -0.32294 |
| C  | -2.14687 | -3.00841 | -3.98683 |
| H  | -1.16323 | -1.11191 | -4.18474 |
| C  | -2.82860 | -3.86647 | -3.13801 |
| H  | -3.60972 | -4.17397 | -1.15943 |
| H  | -1.96217 | -3.28990 | -5.01642 |
| H  | -3.17712 | -4.82473 | -3.50570 |
| C  | 2.30380  | -0.10270 | 0.94012  |
| C  | 3.22298  | -0.28319 | -0.09877 |
| C  | 2.77411  | 0.21051  | 2.21906  |
| C  | 4.57726  | -0.11440 | 0.13283  |
| H  | 2.88195  | -0.60529 | -1.07753 |
| C  | 4.12887  | 0.38975  | 2.44407  |
| H  | 2.06915  | 0.32658  | 3.03655  |
| C  | 5.02967  | 0.23094  | 1.40026  |
| H  | 5.28380  | -0.26213 | -0.67565 |
| H  | 4.48373  | 0.64795  | 3.43498  |
| H  | 6.09096  | 0.36255  | 1.57733  |
| Cl | -2.77604 | 0.90325  | -0.45504 |

##### R = Mes

|    |          |          |          |
|----|----------|----------|----------|
| P  | 0.33031  | 0.20765  | 0.82469  |
| C  | 0.17456  | 0.04963  | -0.81730 |
| P  | -1.17402 | 0.04909  | -1.91868 |
| Ge | 1.60692  | 0.47503  | -2.24285 |
| Cl | 2.00495  | -1.63150 | -2.87631 |
| O  | -0.43545 | 0.59942  | -3.16058 |
| Au | -1.06091 | 1.92730  | -4.68474 |
| Cl | -1.67507 | 3.33328  | -6.29431 |
| C  | -2.00161 | -1.51637 | -2.18657 |

|    |          |          |          |    |          |          |          |
|----|----------|----------|----------|----|----------|----------|----------|
| C  | -2.67723 | -2.10014 | -1.09134 | H  | 6.25381  | 2.20508  | 2.85106  |
| C  | -1.95987 | -2.18138 | -3.43468 | H  | 5.08749  | 2.83689  | 4.01262  |
| C  | -3.26008 | -3.34747 | -1.25270 | C  | 3.14538  | -0.37677 | -3.49296 |
| C  | -2.57506 | -3.42402 | -3.52639 | H  | 2.18156  | -0.65471 | -3.06115 |
| C  | -3.21664 | -4.03204 | -2.45808 | H  | 2.98761  | -0.16817 | -4.55479 |
| H  | -3.77285 | -3.79164 | -0.40543 | H  | 3.80556  | -1.24263 | -3.41901 |
| H  | -2.54645 | -3.93519 | -4.48303 | C  | 2.77839  | 2.02742  | -3.01889 |
| C  | 2.14513  | 0.31191  | 1.01613  | H  | 1.75138  | 1.79367  | -2.73646 |
| C  | 2.73703  | 1.57213  | 1.18954  | H  | 3.10354  | 2.92809  | -2.48852 |
| C  | 2.91858  | -0.85697 | 1.08936  | H  | 2.75873  | 2.27683  | -4.08366 |
| C  | 4.10788  | 1.64331  | 1.39900  | C  | 5.04088  | 1.24842  | -3.51946 |
| C  | 4.28516  | -0.73447 | 1.30432  | H  | 5.49060  | 2.12935  | -3.05457 |
| C  | 4.90044  | 0.50324  | 1.45256  | H  | 5.78044  | 0.44772  | -3.50415 |
| H  | 4.56796  | 2.61844  | 1.52925  | H  | 4.82797  | 1.48549  | -4.56530 |
| H  | 4.88646  | -1.63676 | 1.36553  | C  | 6.99753  | -2.53591 | -0.93711 |
| C  | 1.91939  | 2.82774  | 1.12852  | H  | 7.38000  | -1.95779 | -1.78244 |
| H  | 1.62540  | 3.06294  | 0.10068  | H  | 7.73205  | -3.31329 | -0.71424 |
| H  | 0.99673  | 2.74059  | 1.71234  | H  | 6.07470  | -3.03288 | -1.24665 |
| H  | 2.48001  | 3.67958  | 1.51494  | C  | 6.32530  | -2.57285 | 1.44942  |
| C  | 2.30095  | -2.21578 | 0.94685  | H  | 6.20324  | -2.01509 | 2.37991  |
| H  | 1.40407  | -2.31828 | 1.56646  | H  | 5.36739  | -3.04447 | 1.21893  |
| H  | 2.00396  | -2.40899 | -0.08783 | H  | 7.06343  | -3.36036 | 1.62486  |
| H  | 3.00390  | -2.99399 | 1.24620  | C  | 8.12436  | -1.01815 | 0.66882  |
| C  | 6.38150  | 0.60509  | 1.64932  | H  | 8.04776  | -0.41760 | 1.57744  |
| H  | 6.89594  | 0.64951  | 0.68428  | H  | 8.88021  | -1.78908 | 0.84239  |
| H  | 6.64925  | 1.50580  | 2.20416  | H  | 8.47941  | -0.36834 | -0.13503 |
| H  | 6.77259  | -0.26031 | 2.18717  | C  | -2.15503 | 1.32820  | 0.30318  |
| C  | -2.85298 | -1.43098 | 0.23843  | C  | -2.76476 | 0.72260  | 1.44297  |
| H  | -1.95930 | -0.91325 | 0.59069  | C  | -2.94446 | 2.15741  | -0.53607 |
| H  | -3.65642 | -0.69125 | 0.19774  | C  | -4.14661 | 0.63054  | 1.44511  |
| H  | -3.11865 | -2.16976 | 0.99494  | C  | -4.32465 | 2.02254  | -0.45406 |
| C  | -1.31836 | -1.65390 | -4.68258 | C  | -4.94939 | 1.17648  | 0.45061  |
| H  | -1.74818 | -0.69891 | -4.99385 | H  | -4.61837 | 0.10780  | 2.26722  |
| H  | -0.24643 | -1.50164 | -4.55698 | H  | -4.93303 | 2.61091  | -1.12695 |
| H  | -1.46737 | -2.36561 | -5.49411 | C  | -2.04194 | 0.32575  | 2.74425  |
| C  | -3.82609 | -5.39063 | -2.59789 | C  | -2.11836 | -1.17234 | 3.04482  |
| H  | -4.65658 | -5.52924 | -1.90401 | C  | -2.75641 | 1.08288  | 3.88276  |
| H  | -4.18849 | -5.56161 | -3.61275 | H  | -1.52631 | -1.75570 | 2.34083  |
| H  | -3.08360 | -6.16507 | -2.38109 | H  | -1.72969 | -1.36222 | 4.04900  |
| Cl | -2.59930 | 1.39796  | -1.43513 | H  | -3.14659 | -1.53798 | 3.00738  |
|    |          |          |          | H  | -2.77182 | 2.15926  | 3.69473  |
|    |          |          |          | H  | -3.78356 | 0.74961  | 4.03212  |
|    |          |          |          | H  | -2.21509 | 0.90777  | 4.81594  |
|    |          |          |          | C  | -2.42729 | 3.33757  | -1.38081 |
|    |          |          |          | C  | -3.03965 | 4.59599  | -0.73001 |
|    |          |          |          | C  | -2.88612 | 3.28106  | -2.83997 |
|    |          |          |          | H  | -2.74266 | 4.67870  | 0.31825  |
|    |          |          |          | H  | -2.68168 | 5.48457  | -1.25707 |
|    |          |          |          | H  | -4.12905 | 4.59446  | -0.77304 |
|    |          |          |          | H  | -2.46395 | 2.42423  | -3.36392 |
|    |          |          |          | H  | -3.97281 | 3.22460  | -2.92311 |
|    |          |          |          | H  | -2.56406 | 4.18835  | -3.35802 |
|    |          |          |          | C  | -6.44803 | 0.91227  | 0.44390  |
|    |          |          |          | C  | -7.07592 | 1.48446  | 1.72080  |
|    |          |          |          | C  | -6.67800 | -0.60361 | 0.39530  |
|    |          |          |          | H  | -6.92430 | 2.56505  | 1.78550  |
|    |          |          |          | H  | -8.15191 | 1.29084  | 1.72469  |
|    |          |          |          | H  | -6.65386 | 1.02984  | 2.61925  |
|    |          |          |          | H  | -6.22610 | -1.05041 | -0.49264 |
|    |          |          |          | H  | -6.25117 | -1.10893 | 1.26341  |
|    |          |          |          | H  | -7.75070 | -0.81444 | 0.38004  |
|    |          |          |          | Cl | 2.03397  | -1.61644 | 1.85455  |
|    |          |          |          | O  | -0.74010 | -1.00142 | 0.09712  |
|    |          |          |          | Cl | -1.04386 | 0.36400  | -2.35715 |
|    |          |          |          | Au | -2.35214 | -2.29693 | -0.36537 |
|    |          |          |          | Cl | -4.04829 | -3.66430 | -0.84461 |

**R = Mes\***

|   |          |          |          |
|---|----------|----------|----------|
| P | 1.99096  | 2.07364  | -0.19543 |
| C | 1.03069  | 0.71910  | -0.22922 |
| P | -0.69381 | 0.48678  | -0.34685 |
| C | 3.65221  | 1.28112  | -0.20149 |
| C | 4.39584  | 1.23219  | 1.00825  |
| C | 4.10752  | 0.57093  | -1.33169 |
| C | 5.40512  | 0.28846  | 1.10678  |
| C | 5.11267  | -0.38232 | -1.14243 |
| C | 5.73609  | -0.58481 | 0.07330  |
| H | 5.95260  | 0.20880  | 2.03442  |
| H | 5.42476  | -0.96924 | -1.99532 |
| C | 3.73419  | 0.85651  | -2.80285 |
| C | 4.17032  | 2.21102  | 2.17565  |
| C | 6.78538  | -1.66756 | 0.29999  |
| C | 2.82407  | 1.99239  | 2.87126  |
| H | 1.97500  | 2.24696  | 2.23128  |
| H | 2.70057  | 0.95313  | 3.17998  |
| H | 2.75784  | 2.63435  | 3.75460  |
| C | 4.25989  | 3.65065  | 1.65109  |
| H | 5.23161  | 3.83416  | 1.18627  |
| H | 3.48584  | 3.87671  | 0.91460  |
| H | 4.13854  | 4.35582  | 2.47805  |
| C | 5.24755  | 2.06768  | 3.25377  |
| H | 5.20103  | 1.09971  | 3.75806  |

|    |          |          |          |
|----|----------|----------|----------|
| C  | -0.91791 | 3.54132  | -1.32503 |
| H  | -0.55177 | 3.55696  | -0.29565 |
| H  | -0.36119 | 2.79428  | -1.88796 |
| H  | -0.67085 | 4.50927  | -1.76792 |
| C  | -0.59234 | 0.79298  | 2.78877  |
| H  | 0.06601  | 0.23252  | 2.12846  |
| H  | -0.51143 | 1.85891  | 2.55944  |
| H  | -0.19789 | 0.63920  | 3.79612  |
| C  | -7.13878 | 1.54498  | -0.76116 |
| H  | -7.07537 | 2.63645  | -0.74678 |
| H  | -6.71720 | 1.18424  | -1.70254 |
| H  | -8.19865 | 1.28113  | -0.75073 |
| Ge | 1.46236  | -1.32571 | -0.28189 |

#### Coordination through P(sp<sup>2</sup>) atom

##### R = H

|    |          |          |          |
|----|----------|----------|----------|
| P  | 0.42616  | 0.27709  | 0.53146  |
| C  | 0.16492  | 0.17232  | -1.07919 |
| P  | -1.31066 | 0.05384  | -1.98209 |
| Ge | 1.18971  | 0.46642  | -2.92832 |
| Cl | 1.34354  | -1.71807 | -3.35094 |
| O  | -0.86635 | 0.57640  | -3.33655 |
| Au | -0.90489 | 0.26896  | 2.27645  |
| Cl | -2.27101 | 0.25672  | 4.06726  |
| H  | 1.82650  | 0.38822  | 0.67613  |
| H  | -1.79337 | -1.26257 | -2.02964 |
| Cl | -2.88576 | 1.03861  | -1.25472 |

##### R = Me

|    |          |          |          |
|----|----------|----------|----------|
| P  | 0.51440  | 0.33559  | 0.49676  |
| C  | 0.18542  | 0.22799  | -1.09940 |
| P  | -1.33172 | 0.00906  | -1.91836 |
| Ge | 1.11190  | 0.45592  | -2.99496 |
| Cl | 1.48243  | -1.74291 | -3.25624 |
| O  | -0.92001 | 0.36423  | -3.34451 |
| C  | -2.01322 | -1.63095 | -1.77464 |
| H  | -2.29777 | -1.82712 | -0.73984 |
| H  | -2.88639 | -1.70991 | -2.42469 |
| H  | -1.23946 | -2.33008 | -2.09964 |
| C  | 2.29184  | 0.51333  | 0.77078  |
| H  | 2.65102  | -0.37434 | 1.29817  |
| H  | 2.82875  | 0.62514  | -0.17042 |
| H  | 2.46774  | 1.37633  | 1.41655  |
| Au | -0.86339 | 0.22975  | 2.21257  |
| Cl | -2.27906 | 0.08358  | 3.96635  |
| Cl | -2.79375 | 1.23027  | -1.27883 |

##### R = t-Bu

|    |          |          |          |
|----|----------|----------|----------|
| P  | 0.73327  | -0.34646 | 0.50134  |
| C  | 0.17880  | 0.23589  | -0.92681 |
| P  | -1.43192 | 0.14234  | -1.60317 |
| Ge | 0.67571  | 1.66382  | -2.42813 |
| Cl | 1.61721  | 0.23933  | -3.88232 |
| O  | -1.28580 | 1.13328  | -2.75887 |
| C  | -2.06972 | -1.47571 | -2.17393 |
| C  | -3.37721 | -1.20016 | -2.92137 |
| C  | -1.02890 | -2.05565 | -3.13432 |
| C  | -2.30097 | -2.42266 | -1.00199 |
| H  | -4.15522 | -0.82077 | -2.25712 |
| H  | -3.23357 | -0.48986 | -3.73737 |
| H  | -3.72913 | -2.14301 | -3.34863 |
| H  | -0.07421 | -2.24381 | -2.64035 |
| H  | -1.41042 | -3.00913 | -3.50955 |
| H  | -0.84471 | -1.39968 | -3.98537 |

|    |          |          |          |
|----|----------|----------|----------|
| H  | -2.68105 | -3.36939 | -1.39547 |
| H  | -1.37786 | -2.64053 | -0.46075 |
| H  | -3.03299 | -2.03642 | -0.29169 |
| C  | 2.52777  | -0.01611 | 0.79646  |
| C  | 3.20964  | -1.38825 | 0.83849  |
| C  | 3.14371  | 0.85568  | -0.28532 |
| C  | 2.63515  | 0.65836  | 2.16668  |
| H  | 2.75929  | -2.04424 | 1.58756  |
| H  | 3.16944  | -1.88894 | -0.13146 |
| H  | 4.26185  | -1.24932 | 1.10459  |
| H  | 2.67894  | 1.84411  | -0.32413 |
| H  | 4.20437  | 1.00427  | -0.06126 |
| H  | 3.07718  | 0.39234  | -1.27209 |
| H  | 3.69283  | 0.78673  | 2.41460  |
| H  | 2.16459  | 1.64431  | 2.17182  |
| H  | 2.17641  | 0.05562  | 2.95411  |
| Cl | -2.80785 | 0.82868  | -0.29066 |
| Au | -0.37617 | -1.45734 | 2.06157  |
| Cl | -1.50569 | -2.59349 | 3.66161  |

##### R = Ph

|    |          |          |          |
|----|----------|----------|----------|
| P  | 0.54464  | 0.49087  | 0.15773  |
| C  | 0.40952  | -0.02371 | -1.39205 |
| P  | -1.02931 | -0.38713 | -2.29854 |
| Ge | 1.52631  | -0.15031 | -3.17791 |
| Cl | 2.07823  | -2.32241 | -2.99370 |
| O  | -0.44342 | -0.46886 | -3.70576 |
| Au | -1.07833 | 0.98074  | 1.57498  |
| Cl | -2.77562 | 1.43100  | 3.00182  |
| Cl | -2.40255 | 1.08004  | -2.17879 |
| C  | 2.24951  | 0.63575  | 0.65429  |
| C  | 3.27669  | -0.05011 | -0.00033 |
| C  | 2.54385  | 1.45866  | 1.74405  |
| C  | 4.58426  | 0.11206  | 0.42018  |
| H  | 3.04859  | -0.73849 | -0.80653 |
| C  | 3.85630  | 1.62098  | 2.15247  |
| H  | 1.74134  | 1.97227  | 2.26351  |
| C  | 4.87492  | 0.95112  | 1.48914  |
| H  | 5.37949  | -0.42637 | -0.08161 |
| H  | 4.08391  | 2.26674  | 2.99214  |
| H  | 5.90178  | 1.07342  | 1.81422  |
| C  | -1.88985 | -1.87546 | -1.83167 |
| C  | -1.59579 | -3.04263 | -2.53421 |
| C  | -2.78381 | -1.89519 | -0.76146 |
| C  | -2.20795 | -4.22962 | -2.16433 |
| H  | -0.89310 | -3.01631 | -3.35785 |
| C  | -3.38321 | -3.08780 | -0.39825 |
| H  | -3.01664 | -0.98667 | -0.21743 |
| C  | -3.09657 | -4.25211 | -1.09991 |
| H  | -1.98675 | -5.13902 | -2.71021 |
| H  | -4.07847 | -3.10690 | 0.43239  |
| H  | -3.57177 | -5.18342 | -0.81353 |

##### R = Mes

|    |          |          |          |
|----|----------|----------|----------|
| P  | 0.45446  | 0.51661  | 0.84531  |
| C  | 0.16398  | -0.04834 | -0.66332 |
| P  | -1.21762 | -0.26970 | -1.70340 |
| Ge | 1.38645  | 0.18371  | -2.36238 |
| Cl | 1.76153  | -2.00868 | -2.71766 |
| O  | -0.57370 | 0.18547  | -3.01328 |
| Au | -0.91554 | 1.04186  | 2.49759  |
| Cl | -2.29489 | 1.58523  | 4.20778  |
| C  | 2.23182  | 0.72173  | 1.04316  |
| C  | 3.05344  | -0.40371 | 1.21311  |
| C  | 2.76568  | 2.02053  | 1.06330  |
| C  | 4.41542  | -0.19815 | 1.39003  |

|    |          |          |          |
|----|----------|----------|----------|
| C  | 4.13375  | 2.16786  | 1.23761  |
| C  | 4.97473  | 1.07357  | 1.40476  |
| H  | 5.05865  | -1.06245 | 1.52373  |
| H  | 4.55471  | 3.16864  | 1.24186  |
| C  | -1.93953 | -1.90741 | -1.77908 |
| C  | -2.34062 | -2.54131 | -0.58543 |
| C  | -2.11930 | -2.55103 | -3.02452 |
| C  | -2.87944 | -3.81713 | -0.65338 |
| C  | -2.66565 | -3.82826 | -3.02068 |
| C  | -3.04042 | -4.48539 | -1.85794 |
| H  | -3.19026 | -4.29697 | 0.26926  |
| H  | -2.81019 | -4.32371 | -3.97538 |
| C  | 1.89770  | 3.22794  | 0.87605  |
| H  | 1.42914  | 3.23437  | -0.11281 |
| H  | 1.09217  | 3.26415  | 1.61654  |
| H  | 2.48061  | 4.14399  | 0.97306  |
| C  | 2.50571  | -1.79937 | 1.21508  |
| H  | 1.63171  | -1.88787 | 1.86784  |
| H  | 2.19873  | -2.11031 | 0.21256  |
| H  | 3.25736  | -2.50457 | 1.57070  |
| C  | 6.44301  | 1.26351  | 1.62688  |
| H  | 6.65506  | 1.40863  | 2.69081  |
| H  | 7.01206  | 0.39391  | 1.29472  |
| H  | 6.81511  | 2.14245  | 1.09770  |
| C  | -2.20939 | -1.91397 | 0.76768  |
| H  | -1.18173 | -1.98206 | 1.13394  |
| H  | -2.49318 | -0.86044 | 0.78049  |
| H  | -2.84683 | -2.42910 | 1.48638  |
| C  | -1.77815 | -1.96185 | -4.36195 |
| H  | -2.20485 | -0.96907 | -4.50359 |
| H  | -0.69861 | -1.86403 | -4.48595 |
| H  | -2.15671 | -2.61434 | -5.14900 |
| C  | -3.59208 | -5.87510 | -1.90213 |
| H  | -4.12345 | -6.06375 | -2.83629 |
| H  | -2.78251 | -6.60842 | -1.83216 |
| H  | -4.27395 | -6.06044 | -1.07067 |
| Cl | -2.74320 | 0.99286  | -1.27392 |

**R = Mes\***

|    |          |          |          |
|----|----------|----------|----------|
| P  | -1.15269 | 0.84528  | 0.02807  |
| C  | -0.25918 | -0.47827 | 0.40047  |
| P  | 1.39945  | -0.99411 | 0.62444  |
| Cl | -1.42391 | -3.08392 | -1.40180 |
| O  | 1.20085  | -2.48157 | 0.32460  |
| C  | 3.03432  | -0.48868 | 0.02415  |
| C  | 3.57763  | -1.30524 | -1.01125 |
| C  | 3.91685  | 0.27939  | 0.82824  |
| C  | 4.92719  | -1.61146 | -0.93519 |
| C  | 5.26067  | -0.07881 | 0.82777  |
| C  | 5.77682  | -1.08739 | 0.03077  |
| H  | 5.33527  | -2.28450 | -1.67804 |
| H  | 5.92844  | 0.47093  | 1.47591  |
| C  | -2.88214 | 0.28852  | 0.10343  |
| C  | -3.58474 | -0.04009 | -1.08654 |
| C  | -3.41913 | -0.05901 | 1.36775  |
| C  | -4.67505 | -0.89443 | -0.96922 |
| C  | -4.49829 | -0.93646 | 1.38712  |
| C  | -5.11045 | -1.41366 | 0.24099  |
| H  | -5.19245 | -1.18951 | -1.86659 |
| H  | -4.88039 | -1.25321 | 2.34910  |
| C  | -3.27937 | 0.55815  | -2.47381 |
| C  | -3.01735 | 0.51596  | 2.74425  |
| C  | -6.23831 | -2.43491 | 0.34363  |
| C  | 3.58493  | 1.59695  | 1.55407  |
| C  | 2.84579  | -1.75582 | -2.28942 |
| C  | 7.22407  | -1.55481 | 0.11593  |

|   |          |          |          |
|---|----------|----------|----------|
| C | -4.28838 | 1.11023  | 3.38087  |
| H | -4.03583 | 1.55294  | 4.34776  |
| H | -4.71084 | 1.89457  | 2.74821  |
| H | -5.06402 | 0.36457  | 3.55390  |
| C | -2.01031 | 1.66295  | 2.71231  |
| H | -0.99522 | 1.33697  | 2.48103  |
| H | -2.30231 | 2.45296  | 2.01531  |
| H | -1.96240 | 2.11642  | 3.70616  |
| C | -2.46950 | -0.58423 | 3.65791  |
| H | -3.17659 | -1.40796 | 3.77202  |
| H | -1.53675 | -0.99612 | 3.26740  |
| H | -2.26746 | -0.17536 | 4.65194  |
| C | -7.39291 | -1.84855 | 1.16434  |
| H | -8.20349 | -2.57796 | 1.24526  |
| H | -7.08074 | -1.58612 | 2.17722  |
| H | -7.79199 | -0.94773 | 0.69160  |
| C | -6.77977 | -2.84111 | -1.02445 |
| H | -7.56519 | -3.58959 | -0.89589 |
| H | -7.21856 | -1.99432 | -1.55845 |
| H | -6.00246 | -3.28177 | -1.65335 |
| C | -5.70332 | -3.69185 | 1.04081  |
| H | -4.87803 | -4.13061 | 0.47508  |
| H | -5.34068 | -3.47349 | 2.04742  |
| H | -6.49633 | -4.43991 | 1.12617  |
| C | -4.21654 | 0.01063  | -3.55507 |
| H | -5.26601 | 0.22955  | -3.34647 |
| H | -3.96821 | 0.49316  | -4.50270 |
| H | -4.10057 | -1.06707 | -3.69332 |
| C | -3.52313 | 2.07185  | -2.40351 |
| H | -4.55790 | 2.28308  | -2.12261 |
| H | -2.87270 | 2.56536  | -1.67800 |
| H | -3.33268 | 2.52844  | -3.37839 |
| C | -1.85982 | 0.26936  | -2.96854 |
| H | -1.08645 | 0.78026  | -2.39057 |
| H | -1.64453 | -0.79945 | -2.95371 |
| H | -1.75506 | 0.63641  | -3.99334 |
| C | 2.14183  | 2.05437  | 1.39754  |
| H | 1.83918  | 2.02954  | 0.34779  |
| H | 1.43378  | 1.47684  | 1.98835  |
| H | 2.05273  | 3.09285  | 1.72336  |
| C | 4.43300  | 2.67673  | 0.84776  |
| H | 4.21204  | 3.65157  | 1.28960  |
| H | 5.50355  | 2.49520  | 0.94741  |
| H | 4.19330  | 2.72857  | -0.21666 |
| C | 3.96752  | 1.57865  | 3.03617  |
| H | 5.02607  | 1.35501  | 3.18185  |
| H | 3.77806  | 2.56374  | 3.47045  |
| H | 3.38709  | 0.84513  | 3.59495  |
| C | 1.49878  | -1.06752 | -2.48954 |
| H | 1.14424  | -1.26840 | -3.50336 |
| H | 0.72001  | -1.43942 | -1.82855 |
| H | 1.58472  | 0.01723  | -2.38033 |
| C | 2.68058  | -3.27632 | -2.35445 |
| H | 2.04259  | -3.63937 | -1.55096 |
| H | 2.22635  | -3.55565 | -3.30884 |
| H | 3.64773  | -3.78049 | -2.28492 |
| C | 3.71300  | -1.30713 | -3.48328 |
| H | 3.89278  | -0.22955 | -3.45971 |
| H | 4.67843  | -1.81188 | -3.52359 |
| H | 3.18341  | -1.54230 | -4.40979 |
| C | 7.98553  | -0.87631 | 1.25144  |
| H | 8.07086  | 0.20272  | 1.09987  |
| H | 7.51087  | -1.05291 | 2.21986  |
| H | 8.99969  | -1.27932 | 1.30085  |
| C | 7.94400  | -1.24582 | -1.20232 |
| H | 7.47793  | -1.75286 | -2.04934 |

|    |          |          |          |
|----|----------|----------|----------|
| H  | 7.94020  | -0.17286 | -1.40898 |
| H  | 8.98418  | -1.57807 | -1.14672 |
| C  | 7.23898  | -3.06855 | 0.36126  |
| H  | 6.74092  | -3.31792 | 1.30120  |
| H  | 6.73492  | -3.61369 | -0.43911 |
| H  | 8.26979  | -3.42896 | 0.41513  |
| Cl | 1.60912  | -0.95509 | 2.66557  |
| Au | -0.52857 | 2.91235  | -0.50564 |
| Cl | 0.10022  | 5.03194  | -1.02227 |
| Ge | -0.84125 | -2.52312 | 0.69473  |

#### Coordination through $\pi(\text{C}=\text{P})$ bond

##### R = H

|    |          |          |          |
|----|----------|----------|----------|
| P  | 0.43623  | -0.14722 | 0.66482  |
| C  | 0.13781  | 0.54961  | -0.88573 |
| P  | -1.29828 | 0.45412  | -1.87599 |
| Ge | 1.19090  | 1.06622  | -2.69026 |
| Cl | 1.38634  | -1.07733 | -3.31623 |
| O  | -0.85617 | 1.19045  | -3.12818 |
| Au | 0.17742  | 2.20616  | 0.47716  |
| Cl | 0.16734  | 4.24408  | 1.41643  |
| H  | 1.86350  | -0.11760 | 0.60806  |
| H  | -1.65090 | -0.88200 | -2.12069 |
| Cl | -3.00420 | 1.19000  | -1.13565 |

##### R = Me

|    |          |          |          |
|----|----------|----------|----------|
| P  | 0.46687  | -0.01079 | 0.65209  |
| C  | 0.10008  | 0.70276  | -0.87326 |
| P  | -1.34777 | 0.49603  | -1.84037 |
| Ge | 1.11778  | 1.20593  | -2.69074 |
| Cl | 1.61047  | -0.94523 | -3.17058 |
| O  | -0.88589 | 1.08613  | -3.16955 |
| C  | -1.87187 | -1.20325 | -1.98548 |
| H  | -2.20966 | -1.57569 | -1.01747 |
| H  | -2.68367 | -1.25960 | -2.71256 |
| H  | -1.01301 | -1.77697 | -2.34094 |
| C  | 2.29762  | -0.09706 | 0.66556  |
| H  | 2.56781  | -1.09411 | 0.30141  |
| H  | 2.77947  | 0.64973  | 0.03558  |
| H  | 2.65253  | -0.00420 | 1.69368  |
| Au | 0.07460  | 2.33598  | 0.51831  |
| Cl | 0.00271  | 4.32576  | 1.56449  |
| Cl | -2.98265 | 1.46977  | -1.18147 |

##### R = *t*-Bu

|    |          |          |          |
|----|----------|----------|----------|
| P  | 0.64836  | -0.11054 | 0.45758  |
| C  | 0.05982  | 0.71629  | -0.94194 |
| P  | -1.45929 | 0.36517  | -1.78265 |
| Ge | 0.74818  | 1.65039  | -2.75800 |
| Cl | 1.81546  | -0.14868 | -3.59975 |
| O  | -1.14353 | 0.94535  | -3.15968 |
| Au | -0.14250 | 2.12026  | 0.68401  |
| Cl | -0.43518 | 3.88688  | 2.05244  |
| C  | -2.05461 | -1.36465 | -1.88289 |
| C  | -3.20792 | -1.38791 | -2.88900 |
| C  | -0.89710 | -2.22173 | -2.40030 |
| C  | -2.51408 | -1.85472 | -0.51221 |
| H  | -4.06122 | -0.80018 | -2.54679 |
| H  | -2.89590 | -1.01618 | -3.86631 |
| H  | -3.53758 | -2.42382 | -3.00671 |
| H  | -0.06429 | -2.25653 | -1.69592 |
| H  | -1.26572 | -3.24249 | -2.53367 |
| H  | -0.51640 | -1.86562 | -3.35803 |
| H  | -2.81557 | -2.90178 | -0.60484 |
| H  | -1.71500 | -1.80480 | 0.23120  |

|    |          |          |          |
|----|----------|----------|----------|
| H  | -3.36991 | -1.28945 | -0.14138 |
| C  | 2.50490  | 0.07272  | 0.54866  |
| C  | 3.03324  | -1.26305 | 0.00923  |
| C  | 3.11744  | 1.23344  | -0.21495 |
| C  | 2.82068  | 0.18953  | 2.04188  |
| H  | 2.59821  | -2.11793 | 0.53561  |
| H  | 2.83631  | -1.36983 | -1.05981 |
| H  | 4.11677  | -1.30338 | 0.15970  |
| H  | 2.70924  | 2.19516  | 0.10412  |
| H  | 4.19712  | 1.25537  | -0.03246 |
| H  | 2.98408  | 1.12544  | -1.29312 |
| H  | 3.90374  | 0.13451  | 2.18713  |
| H  | 2.47241  | 1.13942  | 2.45467  |
| H  | 2.36564  | -0.61979 | 2.61984  |
| Cl | -3.01255 | 1.39628  | -0.98824 |

##### R = Ph

|    |          |          |          |
|----|----------|----------|----------|
| P  | 0.33247  | 0.47169  | 0.48810  |
| C  | 0.17461  | 0.67976  | -1.21684 |
| P  | -1.27291 | 0.40031  | -2.16674 |
| Ge | 1.21828  | 0.93927  | -3.08291 |
| Cl | 1.70162  | -1.22113 | -3.51074 |
| O  | -0.78479 | 0.79151  | -3.55858 |
| Au | 0.26584  | 2.68612  | -0.40739 |
| Cl | 0.38812  | 4.90381  | -0.03783 |
| C  | -1.87807 | -1.27722 | -2.10609 |
| C  | -2.44831 | -1.78567 | -0.93974 |
| C  | -1.75619 | -2.07324 | -3.24092 |
| C  | -2.89404 | -3.09440 | -0.91303 |
| H  | -2.54784 | -1.16143 | -0.05823 |
| C  | -2.21243 | -3.38215 | -3.20535 |
| H  | -1.30152 | -1.66915 | -4.13631 |
| C  | -2.77700 | -3.89070 | -2.04617 |
| H  | -3.33679 | -3.49480 | -0.00881 |
| H  | -2.12043 | -4.00574 | -4.08656 |
| H  | -3.12951 | -4.91553 | -2.02208 |
| C  | 2.09839  | 0.26321  | 0.81834  |
| C  | 3.01628  | -0.26271 | -0.09200 |
| C  | 2.52085  | 0.59117  | 2.10989  |
| C  | 4.33981  | -0.42919 | 0.27933  |
| H  | 2.69157  | -0.57335 | -1.07831 |
| C  | 3.84867  | 0.43880  | 2.47002  |
| H  | 1.80644  | 0.98064  | 2.82869  |
| C  | 4.75870  | -0.07054 | 1.55389  |
| H  | 5.04708  | -0.84374 | -0.42967 |
| H  | 4.17344  | 0.71227  | 3.46709  |
| H  | 5.79720  | -0.19801 | 1.83742  |
| Cl | -2.86033 | 1.52688  | -1.63522 |

##### R = Mes

|    |          |          |          |
|----|----------|----------|----------|
| P  | 0.31520  | 0.36389  | 1.04217  |
| C  | -0.04966 | 0.67088  | -0.61929 |
| P  | -1.44180 | 0.42953  | -1.67975 |
| Ge | 1.00455  | 1.47992  | -2.29976 |
| Cl | 1.80869  | -0.40043 | -3.25348 |
| O  | -0.95021 | 1.22660  | -2.88731 |
| Au | -0.28236 | 2.58175  | 0.39048  |
| Cl | -0.61914 | 4.74303  | 0.94995  |
| C  | -1.86110 | -1.27651 | -2.04191 |
| C  | -2.24953 | -2.12497 | -0.98344 |
| C  | -1.80316 | -1.77196 | -3.36556 |
| C  | -2.46443 | -3.46957 | -1.24722 |
| C  | -2.04481 | -3.12634 | -3.56097 |
| C  | -2.34727 | -3.99718 | -2.52452 |
| H  | -2.75062 | -4.11893 | -0.42575 |
| H  | -1.99745 | -3.51060 | -4.57480 |



|                 |          |          |          |   |          |          |          |
|-----------------|----------|----------|----------|---|----------|----------|----------|
| C               | 2.13758  | 0.28147  | 1.10012  | H | 2.61617  | -3.07370 | -1.21988 |
| C               | 2.72786  | -0.88837 | 0.58433  | H | 4.11860  | -3.60455 | -0.46936 |
| C               | 2.91829  | 1.22073  | 1.79145  | H | 2.63931  | -4.49845 | -0.16334 |
| C               | 4.10315  | -1.03980 | 0.68334  | C | 3.49478  | -3.19586 | 2.12056  |
| C               | 4.29284  | 1.02349  | 1.85635  | H | 4.57299  | -3.16251 | 1.95615  |
| C               | 4.90853  | -0.08446 | 1.29156  | H | 3.27524  | -2.62653 | 3.02736  |
| H               | 4.55623  | -1.94277 | 0.28497  | H | 3.20601  | -4.23747 | 2.29077  |
| H               | 4.89790  | 1.75771  | 2.38000  | C | 1.24423  | -2.79702 | 1.23299  |
| C               | 2.33097  | 2.42062  | 2.47025  | H | 0.95231  | -2.25003 | 2.13524  |
| H               | 2.13826  | 3.23712  | 1.76811  | H | 0.59870  | -2.49933 | 0.40736  |
| H               | 1.38108  | 2.19205  | 2.96155  | H | 1.04145  | -3.85336 | 1.43219  |
| H               | 3.01476  | 2.79949  | 3.23130  | C | 7.21447  | 1.69696  | 0.07667  |
| C               | 1.91128  | -1.99518 | -0.01528 | H | 6.58631  | 2.47848  | -0.35782 |
| H               | 1.04364  | -2.24082 | 0.60690  | H | 7.35554  | 1.91780  | 1.13801  |
| H               | 1.54258  | -1.73547 | -1.00970 | H | 8.19466  | 1.75533  | -0.40258 |
| H               | 2.51272  | -2.90012 | -0.10998 | C | 6.53999  | 0.05199  | -1.65408 |
| C               | 6.39535  | -0.25202 | 1.34206  | H | 7.53505  | 0.12461  | -2.10222 |
| H               | 6.83120  | 0.29873  | 2.17715  | H | 6.13955  | -0.93902 | -1.87563 |
| H               | 6.67535  | -1.30285 | 1.43767  | H | 5.89094  | 0.78331  | -2.14100 |
| H               | 6.85573  | 0.12491  | 0.42337  | C | 7.55995  | -0.72270 | 0.49504  |
| C               | -2.53864 | -1.64598 | 0.40706  | H | 7.63022  | -0.57200 | 1.57527  |
| H               | -2.47106 | -2.47346 | 1.11417  | H | 7.22158  | -1.74568 | 0.31874  |
| H               | -1.86901 | -0.86139 | 0.75890  | H | 8.56406  | -0.62874 | 0.07215  |
| H               | -3.55414 | -1.24332 | 0.46043  | C | -2.36613 | -1.45447 | -1.66726 |
| C               | -1.54014 | -0.94639 | -4.59080 | C | -2.33016 | -2.33583 | -2.79146 |
| H               | -2.17316 | -0.06056 | -4.63412 | C | -3.60266 | -1.27145 | -0.99121 |
| H               | -0.50618 | -0.60271 | -4.62892 | C | -3.53992 | -2.65097 | -3.39108 |
| H               | -1.73269 | -1.55147 | -5.47705 | C | -1.10146 | -3.10215 | -3.31657 |
| C               | -2.54347 | -5.45815 | -2.77850 | C | -4.76743 | -1.66246 | -1.64205 |
| H               | -2.95159 | -5.63819 | -3.77437 | C | -3.79808 | -0.82725 | 0.46950  |
| H               | -1.58701 | -5.98682 | -2.71721 | C | -4.77360 | -2.25794 | -2.89137 |
| H               | -3.21294 | -5.90573 | -2.04226 | H | -3.51290 | -3.25734 | -4.28648 |
| Cl              | -3.17207 | 1.29033  | -1.05547 | C | -0.60022 | -2.57668 | -4.66494 |
| <b>R = Mes*</b> |          |          |          | C | -1.51051 | -4.57555 | -3.52335 |
| P               | 0.68315  | 0.06050  | 1.14967  | C | 0.01116  | -3.15218 | -2.27764 |
| C               | 0.37669  | 0.14554  | -0.56719 | H | -5.70840 | -1.48394 | -1.14158 |
| P               | -1.08247 | -0.14747 | -1.60295 | C | -2.51062 | -0.47359 | 1.19157  |
| O               | -0.37151 | -0.05615 | -2.95396 | C | -4.37455 | -2.05498 | 1.20332  |
| Cl              | 2.68454  | -1.03794 | -3.00785 | C | -4.78479 | 0.33532  | 0.61329  |
| Au              | 0.26123  | 2.20288  | 0.11787  | C | -6.05044 | -2.56554 | -3.66226 |
| Cl              | -0.03897 | 4.44752  | 0.29433  | H | 0.20428  | -3.22051 | -5.03022 |
| C               | 2.53088  | -0.02589 | 1.24131  | H | -1.40528 | -2.59485 | -5.40449 |
| C               | 3.21687  | -1.17659 | 0.76272  | H | -0.22158 | -1.56148 | -4.59305 |
| C               | 3.29869  | 1.09459  | 1.64313  | H | -2.17744 | -4.71924 | -4.37410 |
| C               | 4.53288  | -1.02639 | 0.35423  | H | -0.60887 | -5.15972 | -3.72350 |
| C               | 4.60929  | 1.18238  | 1.17035  | H | -1.99251 | -4.98860 | -2.63408 |
| C               | 5.22466  | 0.17543  | 0.44917  | H | 0.43443  | -2.18069 | -2.03466 |
| H               | 5.04678  | -1.89058 | -0.04597 | H | -0.34680 | -3.62725 | -1.36082 |
| H               | 5.17157  | 2.07501  | 1.40625  | H | 0.84131  | -3.74735 | -2.66296 |
| C               | 2.92565  | 2.13757  | 2.71852  | H | -1.76460 | -1.26455 | 1.09045  |
| C               | 2.72458  | -2.63041 | 0.91170  | H | -2.08416 | 0.47245  | 0.85818  |
| C               | 6.62209  | 0.30790  | -0.14446 | H | -2.70926 | -0.35656 | 2.25939  |
| C               | 3.92451  | 1.90893  | 3.87268  | H | -4.50737 | -1.81321 | 2.26128  |
| H               | 3.84123  | 0.89297  | 4.26739  | H | -5.34216 | -2.35977 | 0.80325  |
| H               | 4.95764  | 2.06405  | 3.56056  | H | -3.69544 | -2.90807 | 1.13138  |
| H               | 3.70839  | 2.60965  | 4.68374  | H | -5.76495 | 0.10059  | 0.19512  |
| C               | 3.08422  | 3.57555  | 2.21903  | H | -4.92670 | 0.55947  | 1.67374  |
| H               | 2.39829  | 3.80194  | 1.40253  | H | -4.41464 | 1.23709  | 0.12583  |
| H               | 2.86721  | 4.27233  | 3.03330  | C | -7.29422 | -2.02976 | -2.95837 |
| H               | 4.10079  | 3.77837  | 1.87756  | C | -6.20130 | -4.08294 | -3.82481 |
| C               | 1.54389  | 1.97696  | 3.34606  | C | -5.95910 | -1.91223 | -5.04667 |
| H               | 1.47848  | 2.62945  | 4.22088  | H | -7.45382 | -2.50808 | -1.98862 |
| H               | 0.72970  | 2.27441  | 2.68355  | H | -7.23970 | -0.94898 | -2.80599 |
| H               | 1.36670  | 0.95400  | 3.68869  | H | -8.17529 | -2.23405 | -3.57102 |
| C               | 3.04486  | -3.49373 | -0.31147 | H | -5.36335 | -4.51895 | -4.37209 |
|                 |          |          |          | H | -6.26180 | -4.57739 | -2.85217 |

|    |          |          |          |
|----|----------|----------|----------|
| H  | -7.11585 | -4.31015 | -4.37924 |
| H  | -5.86048 | -0.82744 | -4.96216 |
| H  | -5.10302 | -2.28268 | -5.61392 |
| H  | -6.86241 | -2.12893 | -5.62317 |
| Ge | 1.43861  | 0.71240  | -2.35503 |
| Cl | -2.29407 | 1.50514  | -1.59320 |

**[R-P=C(Ge(II)Cl)-P(O)MeR](AuCl)**

**Coordination through Ge(II) atom**

**R= H**

|    |          |          |          |
|----|----------|----------|----------|
| P  | 0.53608  | 0.35901  | 0.47014  |
| C  | 0.11408  | 0.28943  | -1.12944 |
| P  | -1.44949 | 0.02918  | -1.89357 |
| Ge | 0.89018  | 0.66444  | -2.97085 |
| Cl | 1.53924  | -1.33059 | -3.53882 |
| O  | -1.05723 | 0.44394  | -3.32625 |
| C  | -2.83411 | 0.95281  | -1.25070 |
| H  | -2.58389 | 2.01458  | -1.24744 |
| H  | -3.70794 | 0.78347  | -1.88326 |
| H  | -3.05089 | 0.62081  | -0.23252 |
| Au | 1.91521  | 2.63497  | -3.66708 |
| Cl | 2.89046  | 4.59657  | -4.27329 |
| H  | 1.91255  | 0.69659  | 0.29396  |
| H  | -1.84301 | -1.32292 | -1.83820 |

**R = Me**

|    |          |          |          |
|----|----------|----------|----------|
| P  | 0.54552  | 0.34860  | 0.44967  |
| C  | 0.11370  | 0.26877  | -1.14451 |
| P  | -1.45412 | -0.02789 | -1.88436 |
| Ge | 0.84722  | 0.66221  | -2.98658 |
| Cl | 1.57508  | -1.30944 | -3.58705 |
| O  | -1.06939 | 0.39078  | -3.32910 |
| C  | -2.79883 | 0.97210  | -1.25637 |
| H  | -2.51105 | 2.02256  | -1.31019 |
| H  | -3.69215 | 0.80900  | -1.86294 |
| H  | -3.00828 | 0.70456  | -0.21853 |
| C  | -1.96126 | -1.74305 | -1.82050 |
| H  | -2.18254 | -2.03242 | -0.79125 |
| H  | -2.84752 | -1.88669 | -2.44233 |
| H  | -1.14348 | -2.35355 | -2.20648 |
| C  | 2.32865  | 0.76199  | 0.41098  |
| H  | 2.89835  | -0.17277 | 0.42206  |
| H  | 2.60719  | 1.33619  | -0.47422 |
| H  | 2.58996  | 1.31930  | 1.31229  |
| Au | 1.85932  | 2.64410  | -3.68158 |
| Cl | 2.84054  | 4.61518  | -4.26074 |

**R = t-Bu**

|    |          |          |          |
|----|----------|----------|----------|
| P  | 0.45708  | 0.48299  | 0.20271  |
| C  | 0.28404  | 0.16420  | -1.41281 |
| P  | -1.23204 | -0.24835 | -2.23122 |
| Ge | 1.17831  | 0.20543  | -3.23621 |
| Cl | 2.17840  | -1.73052 | -3.37595 |
| O  | -0.65321 | -0.33154 | -3.67367 |
| C  | -2.43186 | 1.08283  | -2.12275 |
| H  | -1.94555 | 1.99235  | -2.47916 |
| H  | -3.29723 | 0.87128  | -2.75249 |
| H  | -2.74935 | 1.22835  | -1.08929 |
| Au | 1.97763  | 2.11428  | -4.32026 |
| Cl | 2.70465  | 4.03728  | -5.30559 |
| C  | 2.22947  | 0.93261  | 0.56543  |
| C  | 3.17697  | 0.87428  | -0.61733 |
| C  | 2.16937  | 2.35285  | 1.13928  |
| C  | 2.67322  | -0.04332 | 1.66050  |

|   |          |          |          |
|---|----------|----------|----------|
| H | 3.22257  | -0.12545 | -1.05552 |
| H | 2.90272  | 1.58971  | -1.39689 |
| H | 4.18907  | 1.13322  | -0.28919 |
| H | 1.47276  | 2.42658  | 1.97932  |
| H | 3.16145  | 2.63596  | 1.50490  |
| H | 1.87230  | 3.08144  | 0.38128  |
| H | 3.66407  | 0.24766  | 2.02323  |
| H | 1.99125  | -0.03740 | 2.51553  |
| H | 2.74207  | -1.06703 | 1.28428  |
| C | -2.03088 | -1.82461 | -1.75616 |
| C | -3.11460 | -2.12749 | -2.79465 |
| C | -0.97186 | -2.92648 | -1.77701 |
| C | -2.63618 | -1.69264 | -0.35951 |
| H | -3.92528 | -1.39592 | -2.77495 |
| H | -2.70282 | -2.16629 | -3.80495 |
| H | -3.55037 | -3.10491 | -2.56988 |
| H | -0.18476 | -2.74784 | -1.04268 |
| H | -1.45383 | -3.87763 | -1.53467 |
| H | -0.50367 | -3.02092 | -2.75772 |
| H | -3.04902 | -2.66061 | -0.06247 |
| H | -1.88880 | -1.40983 | 0.38650  |
| H | -3.45033 | -0.96544 | -0.32793 |

**R = Ph**

|    |          |          |          |
|----|----------|----------|----------|
| P  | 0.62761  | 0.41303  | 0.27365  |
| C  | 0.19429  | 0.19365  | -1.31228 |
| P  | -1.42039 | -0.11123 | -1.94425 |
| Ge | 0.81788  | 0.52369  | -3.20235 |
| Cl | 1.57788  | -1.43137 | -3.83251 |
| O  | -1.10581 | 0.18352  | -3.43540 |
| C  | -2.67855 | 0.99518  | -1.31140 |
| H  | -2.34176 | 2.02205  | -1.46005 |
| H  | -3.61277 | 0.82803  | -1.85055 |
| H  | -2.83639 | 0.81827  | -0.24580 |
| Au | 1.71134  | 2.50403  | -4.05217 |
| Cl | 2.57899  | 4.46548  | -4.82306 |
| C  | 2.38957  | 0.77498  | 0.27422  |
| C  | 2.86074  | 1.48800  | 1.38120  |
| C  | 3.28976  | 0.38950  | -0.72320 |
| C  | 4.19434  | 1.85129  | 1.46564  |
| H  | 2.17118  | 1.77016  | 2.17095  |
| C  | 4.62294  | 0.74429  | -0.62972 |
| H  | 2.95641  | -0.21809 | -1.55703 |
| C  | 5.07374  | 1.48257  | 0.45811  |
| H  | 4.54841  | 2.41975  | 2.31758  |
| H  | 5.31475  | 0.44491  | -1.40809 |
| H  | 6.11867  | 1.76337  | 0.52289  |
| C  | -2.01174 | -1.78864 | -1.74483 |
| C  | -1.96046 | -2.65540 | -2.83318 |
| C  | -2.49306 | -2.23517 | -0.51424 |
| C  | -2.40085 | -3.96228 | -2.68945 |
| H  | -1.57455 | -2.30319 | -3.78209 |
| C  | -2.92678 | -3.54220 | -0.37845 |
| H  | -2.52136 | -1.57175 | 0.34390  |
| C  | -2.88263 | -4.40422 | -1.46685 |
| H  | -2.36293 | -4.63703 | -3.53640 |
| H  | -3.29912 | -3.89052 | 0.57769  |
| H  | -3.22366 | -5.42734 | -1.35790 |

**R = Mes**

|    |          |          |          |
|----|----------|----------|----------|
| P  | 0.75342  | 0.17090  | 0.74379  |
| C  | 0.16766  | 0.07072  | -0.80476 |
| P  | -1.43794 | -0.14558 | -1.52489 |
| Ge | 0.82947  | 0.79053  | -2.56032 |
| Cl | 1.55273  | -0.99910 | -3.59963 |
| O  | -1.09211 | 0.55572  | -2.86953 |

|                 |          |          |          |   |          |          |          |
|-----------------|----------|----------|----------|---|----------|----------|----------|
| C               | -2.75611 | 0.79317  | -0.74327 | C | -2.74180 | 2.71264  | -0.20378 |
| H               | -2.40912 | 1.81598  | -0.58960 | C | -3.01448 | 1.01689  | 1.54584  |
| H               | -3.61192 | 0.79785  | -1.42211 | C | -3.97201 | 2.31676  | -0.72228 |
| H               | -3.06000 | 0.35709  | 0.20776  | C | -4.22398 | 0.66857  | 0.95917  |
| Au              | 1.76111  | 2.89733  | -2.94533 | C | -4.69325 | 1.24771  | -0.21271 |
| Cl              | 2.65864  | 4.98247  | -3.19561 | H | -4.37589 | 2.85564  | -1.56441 |
| C               | 2.46709  | 0.72891  | 0.48513  | H | -4.83257 | -0.08481 | 1.43936  |
| C               | 2.77674  | 2.08087  | 0.69535  | C | -2.09124 | 4.00919  | -0.72687 |
| C               | 3.47020  | -0.19190 | 0.15173  | C | -2.70831 | 0.46825  | 2.95820  |
| C               | 4.08788  | 2.49928  | 0.52350  | C | -5.97929 | 0.73555  | -0.85223 |
| C               | 4.76994  | 0.27395  | -0.00207 | C | 3.97196  | 1.09721  | 2.62350  |
| C               | 5.09718  | 1.61398  | 0.16422  | C | 3.37940  | 0.92711  | -2.48678 |
| H               | 4.32357  | 3.55022  | 0.66048  | C | 7.54197  | -0.83099 | -0.34513 |
| H               | 5.55112  | -0.43486 | -0.26040 | C | -4.01922 | 0.19309  | 3.71068  |
| C               | -2.00383 | -1.84263 | -1.74679 | H | -3.78703 | -0.03239 | 4.75429  |
| C               | -2.39818 | -2.32434 | -3.01554 | H | -4.68864 | 1.05618  | 3.68906  |
| C               | -2.08288 | -2.68215 | -0.61964 | H | -4.55366 | -0.67106 | 3.31353  |
| C               | -2.84030 | -3.63787 | -3.10679 | C | -1.95490 | 1.50395  | 3.79583  |
| C               | -2.53830 | -3.98453 | -0.77620 | H | -0.93495 | 1.69036  | 3.43659  |
| C               | -2.91262 | -4.48787 | -2.01162 | H | -2.47866 | 2.46252  | 3.81824  |
| H               | -3.14822 | -4.00663 | -4.08016 | H | -1.85136 | 1.14176  | 4.82218  |
| H               | -2.60101 | -4.62140 | 0.10088  | C | -1.91650 | -0.84141 | 2.94270  |
| C               | -2.38192 | -1.52050 | -4.28398 | H | -2.42947 | -1.61098 | 2.36231  |
| H               | -2.89745 | -0.56508 | -4.18513 | H | -0.92250 | -0.70512 | 2.51800  |
| H               | -1.36191 | -1.29267 | -4.59700 | H | -1.80044 | -1.21266 | 3.96550  |
| H               | -2.86583 | -2.08911 | -5.07829 | C | -7.14070 | 0.85705  | 0.14125  |
| C               | -1.66729 | -2.26575 | 0.76016  | H | -8.06318 | 0.48782  | -0.31522 |
| H               | -0.60126 | -2.45286 | 0.91595  | H | -6.96483 | 0.27406  | 1.04726  |
| H               | -1.83280 | -1.21081 | 0.97959  | H | -7.29905 | 1.89810  | 0.43477  |
| H               | -2.21387 | -2.84214 | 1.50783  | C | -6.34697 | 1.51144  | -2.11422 |
| C               | -3.36755 | -5.90475 | -2.16761 | H | -7.25723 | 1.08946  | -2.54671 |
| H               | -2.54363 | -6.53452 | -2.51712 | H | -6.54145 | 2.56685  | -1.90474 |
| H               | -3.72016 | -6.31810 | -1.22168 | H | -5.56175 | 1.44758  | -2.87154 |
| H               | -4.17099 | -5.98579 | -2.90213 | C | -5.78435 | -0.73791 | -1.23142 |
| C               | 3.17283  | -1.65024 | -0.03818 | H | -4.96839 | -0.85252 | -1.94880 |
| H               | 2.54296  | -2.04280 | 0.76709  | H | -5.54860 | -1.35746 | -0.36416 |
| H               | 2.64720  | -1.83274 | -0.97968 | H | -6.69710 | -1.13227 | -1.68672 |
| H               | 4.09474  | -2.23293 | -0.05204 | C | -2.99015 | 4.72832  | -1.73576 |
| C               | 1.71341  | 3.07606  | 1.04895  | H | -3.97280 | 4.96074  | -1.31940 |
| H               | 1.15274  | 3.37707  | 0.15798  | H | -2.51778 | 5.67300  | -2.01489 |
| H               | 0.99592  | 2.66932  | 1.77054  | H | -3.12739 | 4.14862  | -2.65150 |
| H               | 2.14842  | 3.97829  | 1.48004  | C | -1.89542 | 4.96704  | 0.45722  |
| C               | 6.49517  | 2.10214  | -0.05649 | H | -2.84788 | 5.17512  | 0.95047  |
| H               | 6.56934  | 2.62496  | -1.01470 | H | -1.20989 | 4.56433  | 1.20651  |
| H               | 6.79720  | 2.80792  | 0.72034  | H | -1.47785 | 5.91478  | 0.10545  |
| H               | 7.20941  | 1.27766  | -0.06963 | C | -0.74867 | 3.78272  | -1.42525 |
|                 |          |          |          | H | 0.02893  | 3.43386  | -0.74046 |
|                 |          |          |          | H | -0.83418 | 3.04999  | -2.22829 |
|                 |          |          |          | H | -0.39342 | 4.72740  | -1.84764 |
|                 |          |          |          | C | 2.56583  | 1.66854  | 2.74785  |
|                 |          |          |          | H | 2.33897  | 2.35203  | 1.92710  |
|                 |          |          |          | H | 1.77940  | 0.91662  | 2.79810  |
|                 |          |          |          | H | 2.49169  | 2.24431  | 3.67349  |
|                 |          |          |          | C | 4.91641  | 2.30840  | 2.77136  |
|                 |          |          |          | H | 4.71269  | 2.81371  | 3.71933  |
|                 |          |          |          | H | 5.96689  | 2.01691  | 2.76421  |
|                 |          |          |          | H | 4.75906  | 3.02549  | 1.96241  |
|                 |          |          |          | C | 4.24915  | 0.13680  | 3.78419  |
|                 |          |          |          | H | 5.28885  | -0.19435 | 3.79802  |
|                 |          |          |          | H | 4.05437  | 0.64307  | 4.73318  |
|                 |          |          |          | H | 3.62300  | -0.75561 | 3.74846  |
|                 |          |          |          | C | 2.18072  | 1.83247  | -2.22167 |
|                 |          |          |          | H | 1.83593  | 2.26118  | -3.16542 |
|                 |          |          |          | H | 1.32536  | 1.31453  | -1.79957 |
|                 |          |          |          | H | 2.45641  | 2.65784  | -1.55965 |
|                 |          |          |          | C | 3.01737  | -0.20872 | -3.44798 |
| <b>R = Mes*</b> |          |          |          |   |          |          |          |
| P               | -0.40276 | 2.04360  | 1.20992  |   |          |          |          |
| C               | 0.14869  | 0.66014  | 0.46998  |   |          |          |          |
| P               | 1.73012  | -0.15255 | 0.31009  |   |          |          |          |
| Cl              | -1.06856 | 0.26967  | -2.66951 |   |          |          |          |
| O               | 1.32666  | -0.96564 | -0.96363 |   |          |          |          |
| C               | 1.85038  | -1.42500 | 1.58635  |   |          |          |          |
| H               | 2.67398  | -2.08649 | 1.31094  |   |          |          |          |
| H               | 2.00139  | -1.05057 | 2.59316  |   |          |          |          |
| H               | 0.91615  | -1.99087 | 1.54515  |   |          |          |          |
| C               | 3.43360  | 0.47080  | 0.11550  |   |          |          |          |
| C               | 4.02030  | 0.41602  | -1.18248 |   |          |          |          |
| C               | 4.29497  | 0.48638  | 1.24475  |   |          |          |          |
| C               | 5.33845  | -0.00903 | -1.27006 |   |          |          |          |
| C               | 5.61425  | 0.08233  | 1.06877  |   |          |          |          |
| C               | 6.13615  | -0.27250 | -0.16466 |   |          |          |          |
| H               | 5.76666  | -0.12355 | -2.25710 |   |          |          |          |
| H               | 6.25825  | 0.05683  | 1.93678  |   |          |          |          |
| C               | -2.20077 | 1.95018  | 0.85582  |   |          |          |          |

|    |          |          |          |
|----|----------|----------|----------|
| H  | 2.25112  | -0.85923 | -3.03417 |
| H  | 2.64632  | 0.21053  | -4.38705 |
| H  | 3.89791  | -0.81433 | -3.67844 |
| C  | 4.41279  | 1.82811  | -3.19328 |
| H  | 4.78476  | 2.61021  | -2.52696 |
| H  | 5.26786  | 1.27516  | -3.58330 |
| H  | 3.92801  | 2.31085  | -4.04532 |
| C  | 8.24751  | -1.06370 | 0.98817  |
| H  | 8.40718  | -0.13103 | 1.53538  |
| H  | 7.68770  | -1.74945 | 1.62919  |
| H  | 9.22944  | -1.50699 | 0.80775  |
| C  | 8.38362  | 0.14721  | -1.17356 |
| H  | 7.95779  | 0.31209  | -2.16510 |
| H  | 8.46166  | 1.11672  | -0.67549 |
| H  | 9.39387  | -0.24896 | -1.30687 |
| C  | 7.44879  | -2.17211 | -1.08290 |
| H  | 6.86517  | -2.89589 | -0.50897 |
| H  | 6.97813  | -2.06418 | -2.06199 |
| H  | 8.44899  | -2.58616 | -1.23570 |
| Au | -1.86015 | -2.64298 | -0.25873 |
| Cl | -3.10660 | -4.46897 | 0.33356  |
| Ge | -0.61005 | -0.73479 | -0.78550 |

#### Coordination through O atom

##### R= H

|    |          |          |          |
|----|----------|----------|----------|
| P  | 0.53475  | 0.19662  | 0.68169  |
| C  | 0.29462  | 0.30392  | -0.95361 |
| P  | -1.21545 | 0.39364  | -1.82151 |
| Ge | 1.45099  | 0.64563  | -2.65831 |
| Cl | 1.35346  | -1.47055 | -3.32404 |
| O  | -0.68463 | 1.03087  | -3.13510 |
| C  | -2.55364 | 1.31998  | -1.08988 |
| H  | -2.22277 | 2.34179  | -0.89975 |
| H  | -3.40697 | 1.32970  | -1.77122 |
| H  | -2.83899 | 0.84389  | -0.14803 |
| Au | -1.97784 | 1.37990  | -4.75638 |
| Cl | -3.39242 | 1.75637  | -6.42717 |
| H  | -1.72753 | -0.89230 | -2.07131 |
| H  | 1.96549  | 0.24746  | 0.68071  |

##### R = Me

|    |          |          |          |
|----|----------|----------|----------|
| P  | 0.52263  | 0.10077  | 0.65034  |
| C  | 0.28136  | 0.28298  | -0.97553 |
| P  | -1.25171 | 0.32322  | -1.80710 |
| Ge | 1.36892  | 0.77785  | -2.68421 |
| Cl | 1.57790  | -1.32707 | -3.40137 |
| O  | -0.73630 | 0.93358  | -3.15329 |
| C  | -2.51558 | 1.36364  | -1.08401 |
| H  | -2.12167 | 2.37362  | -0.96656 |
| H  | -3.39125 | 1.38767  | -1.73631 |
| H  | -2.79498 | 0.96672  | -0.10523 |
| C  | -1.95091 | -1.29972 | -2.07454 |
| H  | -2.27089 | -1.72351 | -1.12025 |
| H  | -2.80388 | -1.22174 | -2.75262 |
| H  | -1.18136 | -1.93159 | -2.52065 |
| C  | 2.34743  | 0.14200  | 0.84793  |
| H  | 2.71772  | -0.88781 | 0.82805  |
| H  | 2.84643  | 0.70886  | 0.06055  |
| H  | 2.59835  | 0.56399  | 1.82295  |
| Au | -2.01891 | 1.30818  | -4.77156 |
| Cl | -3.42593 | 1.70731  | -6.44561 |

##### R = t-Bu

|   |         |         |         |
|---|---------|---------|---------|
| P | 0.62925 | 0.02623 | 0.35813 |
|---|---------|---------|---------|

|    |          |          |          |
|----|----------|----------|----------|
| C  | 0.40201  | 0.07879  | -1.28241 |
| P  | -1.17812 | 0.01789  | -2.04950 |
| Ge | 1.40237  | 0.49369  | -3.07767 |
| Cl | 2.01487  | -1.60591 | -3.53652 |
| O  | -0.69824 | 0.23594  | -3.52688 |
| C  | -2.23190 | 1.38381  | -1.55109 |
| H  | -1.67867 | 2.30920  | -1.71785 |
| H  | -3.14482 | 1.40409  | -2.14813 |
| H  | -2.47518 | 1.29984  | -0.49058 |
| Au | -1.86238 | 0.92942  | -5.12991 |
| Cl | -3.10679 | 1.67894  | -6.81390 |
| C  | -2.10786 | -1.55357 | -1.88017 |
| C  | -3.34895 | -1.50220 | -2.77468 |
| C  | -1.19951 | -2.70212 | -2.31704 |
| C  | -2.51852 | -1.72733 | -0.41755 |
| H  | -4.05150 | -0.72365 | -2.47102 |
| H  | -3.09487 | -1.34585 | -3.82502 |
| H  | -3.86837 | -2.46143 | -2.69550 |
| H  | -0.30321 | -2.77368 | -1.69915 |
| H  | -1.75673 | -3.63826 | -2.22299 |
| H  | -0.88279 | -2.59631 | -3.35523 |
| H  | -3.01472 | -2.69584 | -0.31124 |
| H  | -1.65961 | -1.71953 | 0.25782  |
| H  | -3.22438 | -0.96050 | -0.09103 |
| C  | 2.45794  | 0.15307  | 0.72048  |
| C  | 3.32863  | 0.52401  | -0.46508 |
| C  | 2.58481  | 1.20234  | 1.82845  |
| C  | 2.85649  | -1.22168 | 1.26789  |
| H  | 3.29818  | -0.24413 | -1.24281 |
| H  | 3.04089  | 1.48680  | -0.89609 |
| H  | 4.37315  | 0.61185  | -0.14698 |
| H  | 1.94390  | 0.96963  | 2.68324  |
| H  | 3.61879  | 1.23537  | 2.18584  |
| H  | 2.32211  | 2.20140  | 1.47095  |
| H  | 3.88976  | -1.18403 | 1.62850  |
| H  | 2.22485  | -1.52533 | 2.10763  |
| H  | 2.79617  | -1.99275 | 0.49630  |

##### R = Ph

|    |          |          |          |
|----|----------|----------|----------|
| P  | 0.48052  | 0.41728  | 0.44060  |
| C  | 0.37166  | 0.15189  | -1.19373 |
| P  | -1.10678 | 0.14905  | -2.12225 |
| Ge | 1.60501  | 0.31884  | -2.85383 |
| Cl | 1.84459  | -1.86188 | -3.29095 |
| O  | -0.47243 | 0.40111  | -3.52678 |
| C  | -2.26724 | 1.44764  | -1.70209 |
| H  | -1.75653 | 2.40796  | -1.78541 |
| H  | -3.11518 | 1.41767  | -2.38887 |
| H  | -2.61767 | 1.31640  | -0.67625 |
| Au | -1.54926 | 0.86142  | -5.26875 |
| Cl | -2.70532 | 1.36062  | -7.10148 |
| C  | -1.98928 | -1.40687 | -2.09731 |
| C  | -2.79871 | -1.73145 | -1.00851 |
| C  | -1.84578 | -2.30153 | -3.15424 |
| C  | -3.46657 | -2.94294 | -0.98419 |
| H  | -2.90527 | -1.04762 | -0.17301 |
| C  | -2.52275 | -3.51078 | -3.12401 |
| H  | -1.20776 | -2.05297 | -3.99299 |
| C  | -3.33055 | -3.83055 | -2.04377 |
| H  | -4.09569 | -3.19502 | -0.13875 |
| H  | -2.41614 | -4.20371 | -3.94994 |
| H  | -3.85781 | -4.77742 | -2.02465 |
| C  | 2.24903  | 0.35403  | 0.80372  |
| C  | 2.69000  | 1.08842  | 1.90789  |
| C  | 3.17444  | -0.39308 | 0.06890  |
| C  | 4.03419  | 1.11621  | 2.24136  |

|   |         |          |          |
|---|---------|----------|----------|
| H | 1.97368 | 1.65020  | 2.49966  |
| C | 4.51569 | -0.37168 | 0.41174  |
| H | 2.83766 | -1.02864 | -0.74390 |
| C | 4.94747 | 0.38899  | 1.49103  |
| H | 4.36965 | 1.70069  | 3.09022  |
| H | 5.22603 | -0.95795 | -0.15962 |
| H | 5.99851 | 0.40321  | 1.75597  |

**R = Mes**

|    |          |          |          |
|----|----------|----------|----------|
| P  | 0.35943  | 0.09013  | 0.80258  |
| C  | 0.18950  | 0.05515  | -0.84422 |
| P  | -1.18726 | 0.08340  | -1.93503 |
| Ge | 1.59580  | 0.53234  | -2.27744 |
| Cl | 2.07316  | -1.57113 | -2.88438 |
| O  | -0.40062 | 0.57825  | -3.19505 |
| C  | -2.41727 | 1.33356  | -1.54111 |
| H  | -1.90956 | 2.29934  | -1.51352 |
| H  | -3.17648 | 1.35081  | -2.32564 |
| H  | -2.88501 | 1.14137  | -0.57715 |
| Au | -1.09234 | 1.89902  | -4.67903 |
| Cl | -1.81710 | 3.31154  | -6.23715 |
| C  | -2.00033 | -1.50775 | -2.19564 |
| C  | -2.70631 | -2.06663 | -1.11007 |
| C  | -1.94314 | -2.20095 | -3.42712 |
| C  | -3.31847 | -3.30263 | -1.26205 |
| C  | -2.58642 | -3.43007 | -3.51515 |
| C  | -3.26935 | -4.00614 | -2.45471 |
| H  | -3.85256 | -3.72354 | -0.41567 |
| H  | -2.54383 | -3.95861 | -4.46202 |
| C  | 2.16934  | 0.26153  | 1.00758  |
| C  | 2.72662  | 1.53484  | 1.19585  |
| C  | 2.97410  | -0.88559 | 1.07911  |
| C  | 4.09306  | 1.64069  | 1.42034  |
| C  | 4.33524  | -0.72969 | 1.30735  |
| C  | 4.91577  | 0.52217  | 1.47235  |
| H  | 4.52562  | 2.62663  | 1.56350  |
| H  | 4.95988  | -1.61638 | 1.36378  |
| C  | 1.87962  | 2.77133  | 1.14036  |
| H  | 1.58072  | 3.00260  | 0.11303  |
| H  | 0.96015  | 2.66011  | 1.72460  |
| H  | 2.42143  | 3.63416  | 1.52940  |
| C  | 2.39408  | -2.25763 | 0.91043  |
| H  | 1.49464  | -2.39301 | 1.52027  |
| H  | 2.11050  | -2.43935 | -0.13023 |
| H  | 3.11435  | -3.02266 | 1.20277  |
| C  | 6.39187  | 0.66249  | 1.68369  |
| H  | 6.91330  | 0.73701  | 0.72425  |
| H  | 6.62941  | 1.56131  | 2.25528  |
| H  | 6.80273  | -0.20001 | 2.21144  |
| C  | -2.88114 | -1.39081 | 0.21985  |
| H  | -2.02770 | -0.78465 | 0.52616  |
| H  | -3.76703 | -0.74836 | 0.21646  |
| H  | -3.03218 | -2.13765 | 1.00010  |
| C  | -1.25035 | -1.71750 | -4.66674 |
| H  | -1.65024 | -0.76316 | -5.01710 |
| H  | -0.18084 | -1.58136 | -4.50806 |
| H  | -1.38663 | -2.44726 | -5.46462 |
| C  | -3.90872 | -5.35196 | -2.59015 |
| H  | -4.70749 | -5.49052 | -1.86011 |
| H  | -4.32376 | -5.49535 | -3.58937 |
| H  | -3.17124 | -6.14408 | -2.42756 |

**R = Mes\***

|   |          |         |          |
|---|----------|---------|----------|
| P | 1.97406  | 2.05802 | -0.37323 |
| C | 1.00231  | 0.71467 | -0.31627 |
| P | -0.73661 | 0.48297 | -0.47657 |

|   |          |          |          |
|---|----------|----------|----------|
| C | 3.64317  | 1.27638  | -0.30576 |
| C | 4.36043  | 1.29392  | 0.92138  |
| C | 4.13441  | 0.51769  | -1.38753 |
| C | 5.37202  | 0.36303  | 1.09183  |
| C | 5.14003  | -0.41818 | -1.12714 |
| C | 5.73239  | -0.55889 | 0.11213  |
| H | 5.89790  | 0.33440  | 2.03484  |
| H | 5.47461  | -1.04646 | -1.94107 |
| C | 3.78711  | 0.71273  | -2.87979 |
| C | 4.10994  | 2.33359  | 2.03045  |
| C | 6.77745  | -1.62589 | 0.41902  |
| C | 2.75676  | 2.14280  | 2.72067  |
| H | 1.91462  | 2.35994  | 2.05949  |
| H | 2.63525  | 1.11930  | 3.07909  |
| H | 2.67850  | 2.82671  | 3.57102  |
| C | 4.19611  | 3.74328  | 1.42952  |
| H | 5.17307  | 3.90952  | 0.96903  |
| H | 3.43084  | 3.92221  | 0.67129  |
| H | 4.05761  | 4.49111  | 2.21539  |
| C | 5.17407  | 2.25985  | 3.12871  |
| H | 5.12584  | 1.32290  | 3.68842  |
| H | 6.18489  | 2.37934  | 2.73168  |
| H | 4.99955  | 3.07106  | 3.83913  |
| C | 3.18542  | -0.55585 | -3.48988 |
| H | 2.22649  | -0.80244 | -3.02881 |
| H | 3.02043  | -0.41426 | -4.56182 |
| H | 3.84048  | -1.41976 | -3.36461 |
| C | 2.85666  | 1.88408  | -3.18670 |
| H | 1.82339  | 1.69105  | -2.89755 |
| H | 3.18992  | 2.81008  | -2.70885 |
| H | 2.85433  | 2.06189  | -4.26590 |
| C | 5.10559  | 1.03437  | -3.60944 |
| H | 5.56532  | 1.93762  | -3.20075 |
| H | 5.83268  | 0.22599  | -3.53446 |
| H | 4.90516  | 1.20361  | -4.67088 |
| C | 7.02239  | -2.55413 | -0.76748 |
| H | 7.42566  | -2.01770 | -1.63048 |
| H | 7.75181  | -3.31786 | -0.48759 |
| H | 6.10818  | -3.06784 | -1.07529 |
| C | 6.28895  | -2.47415 | 1.59973  |
| H | 6.14231  | -1.87082 | 2.49764  |
| H | 5.33741  | -2.95815 | 1.36846  |
| H | 7.02283  | -3.25057 | 1.83326  |
| C | 8.10579  | -0.95592 | 0.78931  |
| H | 8.00491  | -0.31100 | 1.66454  |
| H | 8.85798  | -1.71529 | 1.02056  |
| H | 8.48058  | -0.34594 | -0.03652 |
| C | -2.17944 | 1.34852  | 0.21681  |
| C | -2.78080 | 0.78557  | 1.37945  |
| C | -2.98590 | 2.14171  | -0.64102 |
| C | -4.16388 | 0.68601  | 1.39788  |
| C | -4.36583 | 2.00705  | -0.54576 |
| C | -4.97990 | 1.19205  | 0.39443  |
| H | -4.62436 | 0.18773  | 2.24141  |
| H | -4.98234 | 2.57082  | -1.23266 |
| C | -2.04562 | 0.43456  | 2.68601  |
| C | -2.09506 | -1.05612 | 3.02726  |
| C | -2.76349 | 1.20762  | 3.81149  |
| H | -1.49504 | -1.64737 | 2.33753  |
| H | -1.69992 | -1.21211 | 4.03477  |
| H | -3.11786 | -1.43863 | 3.00444  |
| H | -2.80730 | 2.27748  | 3.59303  |
| H | -3.78014 | 0.85447  | 3.98616  |
| H | -2.20542 | 1.07273  | 4.74149  |
| C | -2.47599 | 3.29007  | -1.53404 |
| C | -3.12425 | 4.57263  | -0.97203 |

|    |          |          |          |
|----|----------|----------|----------|
| C  | -2.90417 | 3.15109  | -2.99769 |
| H  | -2.86376 | 4.71252  | 0.07955  |
| H  | -2.75958 | 5.43804  | -1.53220 |
| H  | -4.21133 | 4.55515  | -1.05102 |
| H  | -2.47573 | 2.27148  | -3.47830 |
| H  | -3.98915 | 3.07970  | -3.09249 |
| H  | -2.58209 | 4.03106  | -3.56087 |
| C  | -6.47792 | 0.92221  | 0.41224  |
| C  | -7.09524 | 1.52928  | 1.67794  |
| C  | -6.70285 | -0.59511 | 0.41088  |
| H  | -6.94745 | 2.61189  | 1.70882  |
| H  | -8.17032 | 1.33152  | 1.69981  |
| H  | -6.66104 | 1.10370  | 2.58475  |
| H  | -6.25949 | -1.06592 | -0.46908 |
| H  | -6.26338 | -1.07232 | 1.28858  |
| H  | -7.77466 | -0.81119 | 0.41449  |
| Cl | 1.95984  | -1.53380 | 1.92001  |
| O  | -0.75640 | -0.99162 | 0.08722  |
| Au | -2.33950 | -2.30612 | -0.36900 |
| Cl | -4.02233 | -3.68260 | -0.86980 |
| C  | -0.97300 | 3.53106  | -1.44100 |
| H  | -0.65004 | 3.63827  | -0.40329 |
| H  | -0.36270 | 2.75792  | -1.90446 |
| H  | -0.72443 | 4.46131  | -1.95758 |
| C  | -0.60577 | 0.93041  | 2.70220  |
| H  | 0.04918  | 0.38038  | 2.03115  |
| H  | -0.55261 | 1.99545  | 2.46111  |
| H  | -0.18958 | 0.79300  | 3.70308  |
| C  | -7.18454 | 1.51645  | -0.80321 |
| H  | -7.12266 | 2.60794  | -0.82306 |
| H  | -6.77400 | 1.12775  | -1.73845 |
| H  | -8.24381 | 1.25167  | -0.77215 |
| Ge | 1.38789  | -1.33528 | -0.22810 |
| C  | -1.07431 | 0.25547  | -2.23998 |
| H  | -2.11627 | -0.04051 | -2.37152 |
| H  | -0.84964 | 1.12580  | -2.84887 |
| H  | -0.43446 | -0.57249 | -2.55545 |

#### Coordination through P(sp<sup>2</sup>) atom

##### R= H

|    |          |          |          |
|----|----------|----------|----------|
| P  | 0.48645  | 0.28047  | 0.52064  |
| C  | 0.19575  | 0.19747  | -1.08372 |
| P  | -1.31608 | 0.12388  | -1.96194 |
| Ge | 1.19014  | 0.43490  | -2.95798 |
| Cl | 1.28520  | -1.77261 | -3.30929 |
| O  | -0.83114 | 0.58704  | -3.34030 |
| C  | -2.68587 | 1.08244  | -1.33588 |
| H  | -2.39024 | 2.12921  | -1.25611 |
| H  | -3.52907 | 0.99154  | -2.02403 |
| H  | -2.97613 | 0.70636  | -0.35150 |
| Au | -0.87177 | 0.28009  | 2.25502  |
| Cl | -2.32181 | 0.29575  | 3.98409  |
| H  | 1.88721  | 0.38321  | 0.66781  |
| H  | -1.77015 | -1.20903 | -1.97871 |

##### R = Me

|    |          |          |          |
|----|----------|----------|----------|
| P  | 0.53398  | 0.31206  | 0.48794  |
| C  | 0.18343  | 0.23251  | -1.10235 |
| P  | -1.36686 | 0.04177  | -1.89920 |
| Ge | 1.07383  | 0.46540  | -3.01565 |
| Cl | 1.47308  | -1.73602 | -3.26403 |
| O  | -0.93039 | 0.36822  | -3.34117 |
| C  | -2.65327 | 1.15417  | -1.33805 |
| H  | -2.29524 | 2.18146  | -1.41206 |

|    |          |          |          |
|----|----------|----------|----------|
| H  | -3.53518 | 1.03269  | -1.97095 |
| H  | -2.91485 | 0.93337  | -0.30069 |
| C  | -1.98484 | -1.63003 | -1.74602 |
| H  | -2.25089 | -1.83755 | -0.70738 |
| H  | -2.86393 | -1.74983 | -2.38310 |
| H  | -1.19928 | -2.31227 | -2.07430 |
| C  | 2.31121  | 0.49624  | 0.76696  |
| H  | 2.67511  | -0.38824 | 1.29583  |
| H  | 2.84379  | 0.60615  | -0.17710 |
| H  | 2.48628  | 1.36318  | 1.40755  |
| Au | -0.87137 | 0.20406  | 2.19106  |
| Cl | -2.37217 | 0.09133  | 3.88062  |

##### R = t-Bu

|    |          |          |          |
|----|----------|----------|----------|
| P  | 0.54604  | 0.35161  | 0.41494  |
| C  | 0.26940  | 0.11134  | -1.17959 |
| P  | -1.26130 | -0.15364 | -2.01453 |
| Ge | 1.18620  | 0.41614  | -3.08006 |
| Cl | 2.03564  | -1.64799 | -3.34944 |
| O  | -0.75329 | -0.01473 | -3.46816 |
| C  | -2.45638 | 1.13564  | -1.64046 |
| H  | -2.00109 | 2.09423  | -1.89328 |
| H  | -3.35912 | 1.00211  | -2.23873 |
| H  | -2.71060 | 1.12870  | -0.57915 |
| Au | -0.95046 | 0.41985  | 2.05409  |
| Cl | -2.51757 | 0.51887  | 3.69021  |
| C  | 2.32394  | 0.60682  | 0.85668  |
| C  | 2.40432  | 1.90714  | 1.65973  |
| C  | 2.71620  | -0.57747 | 1.74643  |
| C  | 3.21614  | 0.67277  | -0.37196 |
| H  | 2.14177  | 2.77589  | 1.05148  |
| H  | 1.74648  | 1.88826  | 2.53208  |
| H  | 3.43011  | 2.04095  | 2.01560  |
| H  | 2.68997  | -1.52068 | 1.19622  |
| H  | 3.73769  | -0.42419 | 2.10761  |
| H  | 2.06314  | -0.66560 | 2.61832  |
| H  | 4.25340  | 0.81018  | -0.05142 |
| H  | 3.17049  | -0.24577 | -0.96079 |
| H  | 2.95908  | 1.51749  | -1.01581 |
| C  | -2.06012 | -1.78584 | -1.76035 |
| C  | -1.00059 | -2.88123 | -1.86137 |
| C  | -2.75202 | -1.84190 | -0.40100 |
| C  | -3.08237 | -1.95125 | -2.89002 |
| H  | -0.46948 | -2.85115 | -2.81320 |
| H  | -0.26108 | -2.80422 | -1.06257 |
| H  | -1.49597 | -3.85225 | -1.77281 |
| H  | -3.56321 | -1.11688 | -0.31198 |
| H  | -3.18548 | -2.83740 | -0.27084 |
| H  | -2.05645 | -1.67968 | 0.42600  |
| H  | -3.53619 | -2.94227 | -2.80211 |
| H  | -3.88910 | -1.21682 | -2.83230 |
| H  | -2.61186 | -1.87701 | -3.87161 |

##### R = Ph

|    |          |          |          |
|----|----------|----------|----------|
| P  | 0.52279  | 0.47564  | 0.28625  |
| C  | 0.33261  | 0.03626  | -1.27751 |
| P  | -1.15562 | -0.26496 | -2.15774 |
| Ge | 1.37948  | -0.01814 | -3.10958 |
| Cl | 1.95197  | -2.19501 | -3.01999 |
| O  | -0.57769 | -0.29953 | -3.58657 |
| C  | -2.38784 | 1.02430  | -1.98332 |
| H  | -1.93195 | 1.97825  | -2.25197 |
| H  | -3.22207 | 0.81180  | -2.65475 |
| H  | -2.75055 | 1.07780  | -0.95491 |
| Au | -1.08396 | 0.91011  | 1.75007  |
| Cl | -2.81004 | 1.32077  | 3.15942  |

|   |          |          |          |
|---|----------|----------|----------|
| C | 2.24009  | 0.61272  | 0.74801  |
| C | 3.25120  | -0.03385 | 0.03235  |
| C | 2.56059  | 1.38317  | 1.86751  |
| C | 4.56946  | 0.11550  | 0.42422  |
| H | 3.00302  | -0.68065 | -0.80194 |
| C | 3.88320  | 1.53248  | 2.24800  |
| H | 1.77050  | 1.86639  | 2.43327  |
| C | 4.88623  | 0.90201  | 1.52506  |
| H | 5.35279  | -0.39232 | -0.12596 |
| H | 4.13097  | 2.13736  | 3.11215  |
| H | 5.92113  | 1.01394  | 1.82769  |
| C | -1.92850 | -1.82281 | -1.73335 |
| C | -2.72499 | -1.94451 | -0.59445 |
| C | -1.70460 | -2.92549 | -2.55397 |
| C | -3.29735 | -3.16597 | -0.28407 |
| H | -2.89603 | -1.09673 | 0.06086  |
| C | -2.28534 | -4.14369 | -2.23733 |
| H | -1.07483 | -2.82342 | -3.42920 |
| C | -3.07902 | -4.26364 | -1.10645 |
| H | -3.91402 | -3.26007 | 0.60187  |
| H | -2.11249 | -5.00217 | -2.87557 |
| H | -3.52950 | -5.21863 | -0.86092 |

**R = Mes**

|    |          |          |          |
|----|----------|----------|----------|
| P  | 0.47052  | 0.52779  | 0.81583  |
| C  | 0.18058  | -0.06827 | -0.67895 |
| P  | -1.23834 | -0.25771 | -1.70381 |
| Ge | 1.38295  | 0.11908  | -2.39667 |
| Cl | 1.70810  | -2.09291 | -2.71613 |
| O  | -0.55263 | 0.16279  | -3.02196 |
| C  | -2.58726 | 0.87788  | -1.35806 |
| H  | -2.19098 | 1.89314  | -1.31101 |
| H  | -3.31098 | 0.80489  | -2.17295 |
| H  | -3.08467 | 0.63678  | -0.41821 |
| Au | -0.94925 | 1.11041  | 2.41513  |
| Cl | -2.42510 | 1.72455  | 4.02204  |
| C  | 2.24456  | 0.73854  | 1.04325  |
| C  | 3.06388  | -0.38568 | 1.23214  |
| C  | 2.77983  | 2.03652  | 1.06536  |
| C  | 4.42275  | -0.17951 | 1.43212  |
| C  | 4.14445  | 2.18514  | 1.26426  |
| C  | 4.98218  | 1.09185  | 1.45191  |
| H  | 5.06340  | -1.04349 | 1.57978  |
| H  | 4.56549  | 3.18592  | 1.27051  |
| C  | -1.92997 | -1.92495 | -1.77632 |
| C  | -2.28082 | -2.59050 | -0.58594 |
| C  | -2.17196 | -2.54230 | -3.02370 |
| C  | -2.84317 | -3.85764 | -0.65856 |
| C  | -2.73726 | -3.81177 | -3.02935 |
| C  | -3.07165 | -4.49327 | -1.86863 |
| H  | -3.11318 | -4.35784 | 0.26634  |
| H  | -2.92690 | -4.28196 | -3.98918 |
| C  | 1.91847  | 3.24423  | 0.85125  |
| H  | 1.48043  | 3.24702  | -0.15154 |
| H  | 1.09142  | 3.28288  | 1.56738  |
| H  | 2.49934  | 4.16002  | 0.96265  |
| C  | 2.51896  | -1.78255 | 1.22860  |
| H  | 1.63712  | -1.87164 | 1.87058  |
| H  | 2.22412  | -2.09533 | 0.22301  |
| H  | 3.26790  | -2.48553 | 1.59433  |
| C  | 6.44635  | 1.28255  | 1.69966  |
| H  | 6.63956  | 1.43358  | 2.76638  |
| H  | 7.02089  | 0.41091  | 1.38255  |
| H  | 6.82843  | 2.15830  | 1.17221  |
| C  | -2.05858 | -2.01837 | 0.78114  |
| H  | -1.01622 | -2.13561 | 1.08827  |

|   |          |          |          |
|---|----------|----------|----------|
| H | -2.29395 | -0.95585 | 0.85793  |
| H | -2.67840 | -2.53580 | 1.51374  |
| C | -1.86661 | -1.93327 | -4.36236 |
| H | -2.26328 | -0.92379 | -4.47080 |
| H | -0.79003 | -1.86539 | -4.52534 |
| H | -2.29604 | -2.55567 | -5.14796 |
| C | -3.64584 | -5.87405 | -1.92281 |
| H | -4.25880 | -6.01598 | -2.81459 |
| H | -2.84542 | -6.61984 | -1.95495 |
| H | -4.25726 | -6.08702 | -1.04452 |

**R = Mes\***

|    |          |          |          |
|----|----------|----------|----------|
| P  | -1.13410 | 0.83689  | 0.03358  |
| C  | -0.20865 | -0.44175 | 0.47114  |
| P  | 1.46337  | -0.91389 | 0.80891  |
| Cl | -1.31075 | -3.20945 | -1.16339 |
| O  | 1.25729  | -2.43828 | 0.60634  |
| C  | 3.08576  | -0.48117 | 0.08569  |
| C  | 3.62565  | -1.39673 | -0.86177 |
| C  | 3.98386  | 0.35161  | 0.80401  |
| C  | 4.97434  | -1.70669 | -0.75963 |
| C  | 5.32582  | -0.01348 | 0.84232  |
| C  | 5.83263  | -1.09989 | 0.14738  |
| H  | 5.37288  | -2.45481 | -1.43280 |
| H  | 5.99975  | 0.59393  | 1.43046  |
| C  | -2.85746 | 0.25013  | 0.09506  |
| C  | -3.51498 | -0.16217 | -1.09474 |
| C  | -3.43583 | -0.02642 | 1.35838  |
| C  | -4.59603 | -1.02615 | -0.96281 |
| C  | -4.50299 | -0.91841 | 1.39500  |
| C  | -5.06643 | -1.47705 | 0.26129  |
| H  | -5.07689 | -1.38470 | -1.85735 |
| H  | -4.91434 | -1.18250 | 2.36078  |
| C  | -3.17484 | 0.35868  | -2.50553 |
| C  | -3.09304 | 0.63159  | 2.71423  |
| C  | -6.17869 | -2.51256 | 0.38881  |
| C  | 3.65587  | 1.73752  | 1.39157  |
| C  | 2.88619  | -1.96741 | -2.08481 |
| C  | 7.27685  | -1.56886 | 0.27316  |
| C  | -4.39245 | 1.24604  | 3.26916  |
| H  | -4.18270 | 1.73965  | 4.22166  |
| H  | -4.79331 | 1.99358  | 2.58049  |
| H  | -5.16998 | 0.50380  | 3.44765  |
| C  | -2.09663 | 1.78709  | 2.66177  |
| H  | -1.07173 | 1.46261  | 2.47849  |
| H  | -2.36892 | 2.53673  | 1.91455  |
| H  | -2.09138 | 2.28997  | 3.63277  |
| C  | -2.57158 | -0.41099 | 3.70728  |
| H  | -3.28347 | -1.22474 | 3.85625  |
| H  | -1.63645 | -0.85324 | 3.35719  |
| H  | -2.38757 | 0.05701  | 4.67855  |
| C  | -7.36808 | -1.90599 | 1.14208  |
| H  | -8.16695 | -2.64622 | 1.23978  |
| H  | -7.09168 | -1.58224 | 2.14759  |
| H  | -7.76952 | -1.04065 | 0.60890  |
| C  | -6.67185 | -3.00463 | -0.96937 |
| H  | -7.44865 | -3.75864 | -0.82176 |
| H  | -7.10756 | -2.19692 | -1.56315 |
| H  | -5.86880 | -3.46599 | -1.54912 |
| C  | -5.64073 | -3.71802 | 1.16973  |
| H  | -4.78954 | -4.16852 | 0.65390  |
| H  | -5.31327 | -3.43657 | 2.17280  |
| H  | -6.42093 | -4.47731 | 1.27304  |
| C  | -4.06046 | -0.27730 | -3.58194 |
| H  | -5.12147 | -0.07229 | -3.42367 |
| H  | -3.78957 | 0.15217  | -4.54873 |

|    |          |          |          |
|----|----------|----------|----------|
| H  | -3.91499 | -1.35827 | -3.64846 |
| C  | -3.45570 | 1.86724  | -2.53611 |
| H  | -4.50366 | 2.07002  | -2.30165 |
| H  | -2.84041 | 2.41873  | -1.82167 |
| H  | -3.24331 | 2.26841  | -3.53074 |
| C  | -1.73220 | 0.07916  | -2.93435 |
| H  | -0.99447 | 0.66055  | -2.37711 |
| H  | -1.48429 | -0.97738 | -2.82819 |
| H  | -1.60728 | 0.36692  | -3.98202 |
| C  | 2.23235  | 2.20044  | 1.11198  |
| H  | 2.01078  | 2.13549  | 0.04466  |
| H  | 1.46059  | 1.65483  | 1.65211  |
| H  | 2.12395  | 3.24934  | 1.39565  |
| C  | 4.55213  | 2.74141  | 0.63543  |
| H  | 4.31087  | 3.75620  | 0.96187  |
| H  | 5.61332  | 2.57200  | 0.81937  |
| H  | 4.37942  | 2.68418  | -0.44136 |
| C  | 3.98215  | 1.85324  | 2.88342  |
| H  | 5.03225  | 1.62948  | 3.08184  |
| H  | 3.79475  | 2.87594  | 3.22068  |
| H  | 3.38251  | 1.18318  | 3.49965  |
| C  | 1.55212  | -1.27763 | -2.34684 |
| H  | 1.16975  | -1.59670 | -3.31935 |
| H  | 0.78329  | -1.54065 | -1.62584 |
| H  | 1.66649  | -0.19050 | -2.37480 |
| C  | 2.69755  | -3.48380 | -1.99240 |
| H  | 2.05888  | -3.75171 | -1.15336 |
| H  | 2.23402  | -3.85287 | -2.91122 |
| H  | 3.65841  | -3.99187 | -1.87575 |
| C  | 3.75457  | -1.66066 | -3.32173 |
| H  | 3.96007  | -0.59076 | -3.40712 |
| H  | 4.70736  | -2.19086 | -3.31750 |
| H  | 3.21206  | -1.97392 | -4.21720 |
| C  | 8.04936  | -0.78622 | 1.33161  |
| H  | 8.14101  | 0.27163  | 1.07251  |
| H  | 7.57885  | -0.86137 | 2.31526  |
| H  | 9.06107  | -1.18959 | 1.41664  |
| C  | 7.99349  | -1.39960 | -1.07189 |
| H  | 7.51882  | -1.98456 | -1.86195 |
| H  | 7.99715  | -0.35271 | -1.38488 |
| H  | 9.03128  | -1.73355 | -0.98783 |
| C  | 7.28224  | -3.05045 | 0.66851  |
| H  | 6.78943  | -3.20050 | 1.63218  |
| H  | 6.76721  | -3.66805 | -0.06980 |
| H  | 8.31033  | -3.41328 | 0.75139  |
| Au | -0.57822 | 2.91623  | -0.53681 |
| Cl | -0.01672 | 5.05320  | -1.07021 |
| Ge | -0.75737 | -2.46944 | 0.88680  |
| C  | 1.66408  | -0.75022 | 2.60225  |
| H  | 2.61618  | -1.20583 | 2.87933  |
| H  | 1.61017  | 0.26245  | 2.98716  |
| H  | 0.85511  | -1.34095 | 3.03908  |

#### Coordination through $\pi(\text{C}=\text{P})$ bond

##### R = H

|    |          |          |          |
|----|----------|----------|----------|
| P  | 0.55447  | -0.17113 | 0.65406  |
| C  | 0.21775  | 0.55260  | -0.87169 |
| P  | -1.25944 | 0.51375  | -1.83581 |
| Ge | 1.26200  | 0.99932  | -2.69697 |
| Cl | 1.41374  | -1.18312 | -3.21662 |
| O  | -0.74729 | 1.14365  | -3.13514 |
| C  | -2.72725 | 1.32371  | -1.21513 |
| H  | -2.51493 | 2.37693  | -1.02603 |
| H  | -3.51919 | 1.24019  | -1.96289 |
| H  | -3.04860 | 0.84206  | -0.28880 |

|    |          |          |          |
|----|----------|----------|----------|
| Au | 0.28482  | 2.19215  | 0.51814  |
| Cl | 0.20773  | 4.26941  | 1.37839  |
| H  | 1.98138  | -0.13748 | 0.57559  |
| H  | -1.63316 | -0.83295 | -2.01257 |

##### R = Me

|    |          |          |          |
|----|----------|----------|----------|
| P  | 0.55636  | -0.08732 | 0.63586  |
| C  | 0.15769  | 0.67360  | -0.85298 |
| P  | -1.32052 | 0.50588  | -1.81146 |
| Ge | 1.17101  | 1.16266  | -2.67668 |
| Cl | 1.68938  | -1.00423 | -3.08930 |
| O  | -0.79574 | 1.01778  | -3.16637 |
| C  | -2.74101 | 1.46208  | -1.28042 |
| H  | -2.46916 | 2.51645  | -1.21805 |
| H  | -3.54200 | 1.34076  | -2.01360 |
| H  | -3.08630 | 1.11951  | -0.30310 |
| C  | -1.83597 | -1.20698 | -1.90612 |
| H  | -2.17053 | -1.55597 | -0.92698 |
| H  | -2.64903 | -1.30070 | -2.62914 |
| H  | -0.98203 | -1.79819 | -2.24065 |
| C  | 2.38950  | -0.12843 | 0.64199  |
| H  | 2.68307  | -1.10128 | 0.23351  |
| H  | 2.84746  | 0.65615  | 0.04052  |
| H  | 2.74802  | -0.06879 | 1.67132  |
| Au | 0.10242  | 2.26098  | 0.59602  |
| Cl | -0.09510 | 4.26590  | 1.60757  |

##### R = t-Bu

|    |          |          |          |
|----|----------|----------|----------|
| P  | 0.67708  | -0.12608 | 0.44139  |
| C  | 0.09892  | 0.68782  | -0.96299 |
| P  | -1.44992 | 0.38463  | -1.79752 |
| Ge | 0.79806  | 1.58215  | -2.79825 |
| Cl | 1.87746  | -0.23716 | -3.59585 |
| O  | -1.06826 | 0.91094  | -3.19850 |
| C  | -2.81285 | 1.36485  | -1.14876 |
| H  | -2.52233 | 2.41615  | -1.17861 |
| H  | -3.69039 | 1.22793  | -1.78363 |
| H  | -3.05318 | 1.09176  | -0.12119 |
| Au | -0.09969 | 2.12230  | 0.64456  |
| Cl | -0.49272 | 3.97160  | 1.87820  |
| C  | -2.00642 | -1.36350 | -1.87968 |
| C  | -3.10883 | -1.43509 | -2.94118 |
| C  | -0.83780 | -2.25051 | -2.30483 |
| C  | -2.54035 | -1.80500 | -0.51734 |
| H  | -3.99637 | -0.86398 | -2.66032 |
| H  | -2.75536 | -1.07714 | -3.90965 |
| H  | -3.41461 | -2.47893 | -3.05484 |
| H  | -0.04677 | -2.27230 | -1.55340 |
| H  | -1.20629 | -3.27251 | -2.43162 |
| H  | -0.39746 | -1.92336 | -3.24733 |
| H  | -2.81275 | -2.86274 | -0.57374 |
| H  | -1.79035 | -1.70108 | 0.27102  |
| H  | -3.43480 | -1.25198 | -0.22351 |
| C  | 2.53556  | 0.04235  | 0.54805  |
| C  | 3.05969  | -1.30169 | 0.02627  |
| C  | 3.16100  | 1.19097  | -0.22346 |
| C  | 2.84183  | 0.17231  | 2.04177  |
| H  | 2.61336  | -2.14834 | 0.55668  |
| H  | 2.87054  | -1.41683 | -1.04327 |
| H  | 4.14166  | -1.34892 | 0.18655  |
| H  | 2.75922  | 2.15907  | 0.08469  |
| H  | 4.24022  | 1.20587  | -0.03685 |
| H  | 3.02894  | 1.07543  | -1.30074 |
| H  | 3.92345  | 0.11300  | 2.19640  |
| H  | 2.49626  | 1.12838  | 2.44290  |
| H  | 2.37748  | -0.62831 | 2.62449  |



**R = Ph**

|    |          |          |          |
|----|----------|----------|----------|
| P  | 0.38564  | 0.35850  | 0.52151  |
| C  | 0.20389  | 0.64879  | -1.16499 |
| P  | -1.28158 | 0.42048  | -2.10451 |
| Ge | 1.22173  | 0.93348  | -3.04070 |
| Cl | 1.71680  | -1.23327 | -3.45505 |
| O  | -0.75251 | 0.77925  | -3.50514 |
| C  | -2.68315 | 1.45175  | -1.66659 |
| H  | -2.39500 | 2.50198  | -1.73058 |
| H  | -3.49668 | 1.24746  | -2.36601 |
| H  | -3.01604 | 1.22910  | -0.65112 |
| Au | 0.25778  | 2.61948  | -0.25751 |
| Cl | 0.26224  | 4.84483  | 0.11254  |
| C  | -1.85805 | -1.27681 | -2.04039 |
| C  | -2.39458 | -1.80199 | -0.86528 |
| C  | -1.77830 | -2.06343 | -3.18524 |
| C  | -2.85252 | -3.10790 | -0.84037 |
| H  | -2.44516 | -1.20061 | 0.03689  |
| C  | -2.24283 | -3.36970 | -3.15376 |
| H  | -1.34332 | -1.65191 | -4.08749 |
| C  | -2.77839 | -3.89023 | -1.98581 |
| H  | -3.26559 | -3.51762 | 0.07386  |
| H  | -2.17804 | -3.98361 | -4.04432 |
| H  | -3.13666 | -4.91311 | -1.96384 |
| C  | 2.15907  | 0.19153  | 0.84537  |
| C  | 3.09265  | -0.26331 | -0.08656 |
| C  | 2.57210  | 0.47623  | 2.14988  |
| C  | 4.42143  | -0.40236 | 0.27790  |
| H  | 2.77691  | -0.54101 | -1.08547 |
| C  | 3.90460  | 0.35183  | 2.50410  |
| H  | 1.84566  | 0.80943  | 2.88486  |
| C  | 4.82999  | -0.08664 | 1.56703  |
| H  | 5.14106  | -0.76191 | -0.44852 |
| H  | 4.22108  | 0.59157  | 3.51252  |
| H  | 5.87244  | -0.19239 | 1.84510  |

**R = Mes**

|    |          |          |          |
|----|----------|----------|----------|
| P  | 0.31103  | 0.20241  | 1.01811  |
| C  | -0.08898 | 0.70739  | -0.58341 |
| P  | -1.47895 | 0.50195  | -1.69024 |
| Ge | 0.98420  | 1.61474  | -2.19122 |
| Cl | 1.95599  | -0.21249 | -3.10023 |
| O  | -0.88461 | 1.26001  | -2.89386 |
| C  | -3.02501 | 1.31989  | -1.26318 |
| H  | -2.83223 | 2.38579  | -1.13019 |
| H  | -3.70896 | 1.18006  | -2.10421 |
| H  | -3.47715 | 0.91538  | -0.35981 |
| Au | -0.46559 | 2.43901  | 0.66893  |
| Cl | -1.11262 | 4.49783  | 1.34958  |
| C  | -1.85201 | -1.23249 | -2.03877 |
| C  | -2.31633 | -2.04768 | -0.98789 |
| C  | -1.70569 | -1.77564 | -3.33584 |
| C  | -2.54754 | -3.39593 | -1.22486 |
| C  | -1.96513 | -3.12994 | -3.51088 |
| C  | -2.36254 | -3.96350 | -2.47546 |
| H  | -2.89373 | -4.01542 | -0.40292 |
| H  | -1.85027 | -3.54611 | -4.50680 |
| C  | 2.13970  | 0.20792  | 1.06852  |
| C  | 2.74642  | -0.95602 | 0.55940  |
| C  | 2.91596  | 1.17813  | 1.71962  |
| C  | 4.12593  | -1.08144 | 0.63560  |
| C  | 4.29504  | 1.00636  | 1.76450  |
| C  | 4.92274  | -0.10212 | 1.21412  |
| H  | 4.58880  | -1.97961 | 0.23756  |
| H  | 4.89541  | 1.76363  | 2.26006  |

|   |          |          |          |
|---|----------|----------|----------|
| C | 2.32541  | 2.38731  | 2.37940  |
| H | 2.04948  | 3.15699  | 1.65190  |
| H | 1.42586  | 2.14652  | 2.95236  |
| H | 3.04404  | 2.83563  | 3.06707  |
| C | 1.94026  | -2.07407 | -0.03290 |
| H | 1.09343  | -2.34753 | 0.60681  |
| H | 1.54190  | -1.80390 | -1.01359 |
| H | 2.55808  | -2.96426 | -0.15791 |
| C | 6.41339  | -0.24030 | 1.24331  |
| H | 6.85130  | 0.33001  | 2.06419  |
| H | 6.71513  | -1.28414 | 1.34909  |
| H | 6.85241  | 0.13265  | 0.31265  |
| C | -2.65759 | -1.53800 | 0.38345  |
| H | -2.47903 | -2.31137 | 1.13166  |
| H | -2.08767 | -0.66292 | 0.69239  |
| H | -3.72014 | -1.27902 | 0.43516  |
| C | -1.31669 | -0.99731 | -4.55947 |
| H | -1.91976 | -0.09897 | -4.68884 |
| H | -0.27623 | -0.67404 | -4.51427 |
| H | -1.44318 | -1.62727 | -5.44051 |
| C | -2.57714 | -5.42679 | -2.70329 |
| H | -2.97370 | -5.61999 | -3.70165 |
| H | -1.63074 | -5.96995 | -2.61857 |
| H | -3.26527 | -5.84926 | -1.96948 |

**R = Mes\***

|    |          |          |          |
|----|----------|----------|----------|
| P  | 0.70257  | -0.03970 | 1.14881  |
| C  | 0.38736  | 0.12853  | -0.55649 |
| P  | -1.09496 | -0.10654 | -1.60631 |
| O  | -0.32700 | -0.08970 | -2.95016 |
| Cl | 2.71768  | -1.05434 | -2.97746 |
| Au | 0.21694  | 2.14526  | 0.23079  |
| Cl | -0.25919 | 4.36846  | 0.32805  |
| C  | 2.55461  | -0.08254 | 1.24626  |
| C  | 3.26581  | -1.21756 | 0.76907  |
| C  | 3.29851  | 1.05626  | 1.64131  |
| C  | 4.57770  | -1.03849 | 0.35729  |
| C  | 4.60403  | 1.17472  | 1.16197  |
| C  | 5.24102  | 0.17928  | 0.44319  |
| H  | 5.10932  | -1.89215 | -0.04276 |
| H  | 5.14568  | 2.08187  | 1.39145  |
| C  | 2.90542  | 2.09320  | 2.71621  |
| C  | 2.80376  | -2.68224 | 0.90746  |
| C  | 6.63239  | 0.34244  | -0.15712 |
| C  | -2.13871 | 1.36963  | -1.70222 |
| H  | -2.68081 | 1.60805  | -0.79266 |
| H  | -1.50078 | 2.21280  | -1.97364 |
| H  | -2.84735 | 1.18565  | -2.51318 |
| C  | 3.93416  | 1.92004  | 3.85370  |
| H  | 3.90367  | 0.90464  | 4.25712  |
| H  | 4.95370  | 2.11889  | 3.52290  |
| H  | 3.70108  | 2.61692  | 4.66341  |
| C  | 2.99380  | 3.53158  | 2.20107  |
| H  | 2.28063  | 3.72411  | 1.39861  |
| H  | 2.76969  | 4.22883  | 3.01306  |
| H  | 3.99249  | 3.76895  | 1.83018  |
| C  | 1.54555  | 1.87691  | 3.37468  |
| H  | 1.47145  | 2.52640  | 4.25100  |
| H  | 0.70350  | 2.13901  | 2.73125  |
| H  | 1.41754  | 0.84681  | 3.71741  |
| C  | 3.11031  | -3.52119 | -0.33574 |
| H  | 2.64024  | -3.10373 | -1.22453 |
| H  | 4.18118  | -3.59592 | -0.53017 |
| H  | 2.74020  | -4.53950 | -0.18695 |
| C  | 3.60827  | -3.25364 | 2.09063  |
| H  | 4.68214  | -3.20506 | 1.90326  |

|    |          |          |          |
|----|----------|----------|----------|
| H  | 3.40211  | -2.69931 | 3.00981  |
| H  | 3.33634  | -4.30101 | 2.25302  |
| C  | 1.33359  | -2.87601 | 1.25808  |
| H  | 1.05679  | -2.35582 | 2.17999  |
| H  | 0.66581  | -2.56483 | 0.45454  |
| H  | 1.14702  | -3.94002 | 1.43096  |
| C  | 7.18968  | 1.74809  | 0.05017  |
| H  | 6.53955  | 2.50935  | -0.38802 |
| H  | 7.32945  | 1.98137  | 1.10905  |
| H  | 8.16602  | 1.82781  | -0.43389 |
| C  | 6.55166  | 0.07216  | -1.66427 |
| H  | 7.54270  | 0.16840  | -2.11698 |
| H  | 6.17763  | -0.93114 | -1.87623 |
| H  | 5.88024  | 0.78070  | -2.15441 |
| C  | 7.59868  | -0.65831 | 0.48732  |
| H  | 7.66993  | -0.49593 | 1.56583  |
| H  | 7.28466  | -1.69085 | 0.32211  |
| H  | 8.59830  | -0.54359 | 0.05884  |
| C  | -2.36933 | -1.43854 | -1.65253 |
| C  | -2.33855 | -2.33617 | -2.76084 |
| C  | -3.61625 | -1.22405 | -1.00406 |
| C  | -3.54463 | -2.64091 | -3.37719 |
| C  | -1.11438 | -3.12662 | -3.25922 |
| C  | -4.78033 | -1.60173 | -1.66630 |
| C  | -3.82313 | -0.77227 | 0.45444  |
| C  | -4.77916 | -2.21943 | -2.90527 |
| H  | -3.51263 | -3.25976 | -4.26415 |
| C  | -0.60397 | -2.63926 | -4.61824 |
| C  | -1.53832 | -4.60072 | -3.42644 |
| C  | -0.00359 | -3.15698 | -2.21797 |
| H  | -5.72572 | -1.40314 | -1.18128 |
| C  | -2.53973 | -0.43046 | 1.19073  |
| C  | -4.41395 | -1.99372 | 1.18755  |
| C  | -4.81177 | 0.39024  | 0.59115  |
| C  | -6.04998 | -2.52191 | -3.68914 |
| H  | 0.20150  | -3.29395 | -4.96166 |
| H  | -1.40397 | -2.67483 | -5.36292 |
| H  | -0.22289 | -1.62338 | -4.56684 |
| H  | -2.21247 | -4.76008 | -4.26875 |
| H  | -0.64370 | -5.19904 | -3.61615 |
| H  | -2.01903 | -4.98574 | -2.52381 |
| H  | 0.43260  | -2.18304 | -2.01353 |
| H  | -0.37064 | -3.59230 | -1.28507 |
| H  | 0.81527  | -3.78177 | -2.58015 |
| H  | -1.80592 | -1.23382 | 1.10601  |
| H  | -2.07994 | 0.50127  | 0.86015  |
| H  | -2.75068 | -0.29907 | 2.25449  |
| H  | -4.55682 | -1.74990 | 2.24386  |
| H  | -5.37830 | -2.29414 | 0.77633  |
| H  | -3.73816 | -2.84978 | 1.12347  |
| H  | -5.79402 | 0.14642  | 0.18352  |
| H  | -4.94727 | 0.62949  | 1.64899  |
| H  | -4.46318 | 1.29501  | 0.09100  |
| C  | -7.29576 | -1.95846 | -3.01078 |
| C  | -6.22025 | -4.03935 | -3.82973 |
| C  | -5.93272 | -1.89305 | -5.08273 |
| H  | -7.47430 | -2.41879 | -2.03563 |
| H  | -7.22903 | -0.87609 | -2.87468 |
| H  | -8.17160 | -2.16083 | -3.63160 |
| H  | -5.38096 | -4.49532 | -4.35832 |
| H  | -6.29990 | -4.51698 | -2.85011 |
| H  | -7.13041 | -4.26360 | -4.39266 |
| H  | -5.82540 | -0.80774 | -5.01500 |
| H  | -5.07177 | -2.28077 | -5.63071 |
| H  | -6.82934 | -2.11037 | -5.66947 |
| Ge | 1.44211  | 0.68675  | -2.34723 |

**[R-P=C(Ge(II)Cl)-P(S)ClR](AuCl)**

**Coordination through Ge(II) atom**

**R = H**

|    |          |          |          |
|----|----------|----------|----------|
| P  | 0.43110  | 0.76476  | 0.31787  |
| C  | 0.03493  | 0.37151  | -1.24486 |
| P  | -1.52503 | -0.12198 | -1.85741 |
| Ge | 0.87718  | 0.71438  | -3.04612 |
| Cl | 1.40918  | -1.32317 | -3.61901 |
| Au | 2.16742  | 2.57971  | -3.58636 |
| Cl | 3.43869  | 4.40916  | -4.01917 |
| H  | 1.76648  | 1.19498  | 0.04769  |
| H  | -1.63708 | -1.52299 | -1.88365 |
| Cl | -3.10159 | 0.35164  | -0.71444 |
| S  | -1.50127 | 0.70010  | -3.66904 |

**R = Me**

|    |          |          |          |
|----|----------|----------|----------|
| P  | 0.45862  | 0.55260  | 0.35067  |
| C  | 0.02421  | 0.31097  | -1.23341 |
| P  | -1.57339 | -0.07899 | -1.82231 |
| Ge | 0.84573  | 0.68474  | -3.03100 |
| Cl | 1.42279  | -1.33724 | -3.65733 |
| C  | -1.90584 | -1.84118 | -1.82265 |
| H  | -1.92824 | -2.20744 | -0.79496 |
| H  | -2.86278 | -2.02683 | -2.31238 |
| H  | -1.09900 | -2.32071 | -2.38123 |
| C  | 2.23822  | 0.95899  | 0.26661  |
| H  | 2.80757  | 0.02424  | 0.29584  |
| H  | 2.50704  | 1.50623  | -0.64005 |
| H  | 2.51081  | 1.54446  | 1.14601  |
| Au | 2.19565  | 2.52622  | -3.52896 |
| Cl | 3.53740  | 4.32446  | -3.89631 |
| Cl | -3.07467 | 0.68467  | -0.71250 |
| S  | -1.48351 | 0.70872  | -3.66510 |

**R = t-Bu**

|    |          |          |          |
|----|----------|----------|----------|
| P  | 0.41020  | 0.51378  | 0.05131  |
| C  | 0.27549  | 0.15728  | -1.56836 |
| P  | -1.28239 | -0.22317 | -2.30027 |
| Ge | 1.33295  | 0.34248  | -3.27492 |
| Cl | 2.22995  | -1.63556 | -3.54984 |
| Au | 2.50732  | 2.26867  | -3.89951 |
| Cl | 3.64384  | 4.17695  | -4.40505 |
| C  | 2.17410  | 0.95607  | 0.44914  |
| C  | 3.23362  | 0.26692  | -0.39606 |
| C  | 2.25407  | 2.48043  | 0.29646  |
| C  | 2.34679  | 0.57618  | 1.92328  |
| H  | 3.10757  | -0.81725 | -0.42028 |
| H  | 3.24660  | 0.63883  | -1.42282 |
| H  | 4.22225  | 0.48152  | 0.02275  |
| H  | 1.48063  | 2.99398  | 0.87548  |
| H  | 3.22445  | 2.82384  | 0.66939  |
| H  | 2.16839  | 2.78869  | -0.74782 |
| H  | 3.32446  | 0.92100  | 2.27215  |
| H  | 1.58337  | 1.03665  | 2.55614  |
| H  | 2.30263  | -0.50619 | 2.07119  |
| C  | -2.00109 | -1.87804 | -1.89838 |
| C  | -3.23831 | -2.08243 | -2.77042 |
| C  | -0.93680 | -2.92305 | -2.23318 |
| C  | -2.35997 | -1.93855 | -0.41643 |
| H  | -4.02393 | -1.35978 | -2.54442 |
| H  | -2.99797 | -2.02094 | -3.83393 |
| H  | -3.63400 | -3.08271 | -2.57511 |
| H  | -0.03562 | -2.80011 | -1.63068 |

|    |          |          |          |
|----|----------|----------|----------|
| H  | -1.35522 | -3.91095 | -2.02240 |
| H  | -0.64824 | -2.89250 | -3.28452 |
| H  | -2.73047 | -2.94349 | -0.19639 |
| H  | -1.49359 | -1.75759 | 0.22354  |
| H  | -3.14137 | -1.22536 | -0.15221 |
| Cl | -2.71672 | 1.08952  | -1.72539 |
| S  | -0.84072 | 0.00753  | -4.24705 |

**R = Ph**

|    |          |          |          |
|----|----------|----------|----------|
| P  | 0.49886  | 0.57663  | 0.21323  |
| C  | 0.07652  | 0.26664  | -1.36877 |
| P  | -1.55384 | -0.05971 | -1.91043 |
| Ge | 0.88631  | 0.60358  | -3.17407 |
| Cl | 1.48863  | -1.40917 | -3.82370 |
| Au | 2.20141  | 2.44505  | -3.76313 |
| Cl | 3.51852  | 4.23294  | -4.27026 |
| C  | 2.27217  | 0.85014  | 0.19611  |
| C  | 2.76192  | 1.70181  | 1.19257  |
| C  | 3.16651  | 0.27048  | -0.71009 |
| C  | 4.10980  | 2.01152  | 1.24690  |
| H  | 2.07652  | 2.13537  | 1.91421  |
| C  | 4.51447  | 0.57137  | -0.64140 |
| H  | 2.81541  | -0.44383 | -1.44676 |
| C  | 4.98400  | 1.44949  | 0.32740  |
| H  | 4.47952  | 2.69010  | 2.00641  |
| H  | 5.20187  | 0.12400  | -1.34927 |
| H  | 6.03986  | 1.69056  | 0.36898  |
| C  | -2.05569 | -1.77710 | -1.74491 |
| C  | -2.01496 | -2.61118 | -2.85736 |
| C  | -2.41067 | -2.28272 | -0.49411 |
| C  | -2.33981 | -3.95200 | -2.71758 |
| H  | -1.72656 | -2.21330 | -3.82255 |
| C  | -2.72977 | -3.62198 | -0.36568 |
| H  | -2.44457 | -1.63376 | 0.37343  |
| C  | -2.69577 | -4.45584 | -1.47685 |
| H  | -2.31159 | -4.60205 | -3.58380 |
| H  | -3.00940 | -4.01679 | 0.60382  |
| H  | -2.94913 | -5.50444 | -1.37157 |
| Cl | -2.93517 | 0.95122  | -0.83284 |
| S  | -1.44857 | 0.57335  | -3.80863 |

**R = Mes**

|    |          |          |          |
|----|----------|----------|----------|
| P  | 0.53029  | 0.61398  | 0.49233  |
| C  | 0.32057  | -0.03896 | -1.02811 |
| P  | -1.23339 | -0.32166 | -1.80424 |
| Ge | 1.43850  | 0.15304  | -2.67678 |
| Cl | 1.82412  | -1.95094 | -3.20072 |
| Au | 3.09829  | 1.75308  | -3.08236 |
| Cl | 4.74383  | 3.31512  | -3.36455 |
| C  | 2.28695  | 1.06200  | 0.52095  |
| C  | 2.59098  | 2.43447  | 0.52787  |
| C  | 3.31098  | 0.10526  | 0.58246  |
| C  | 3.92043  | 2.82407  | 0.53425  |
| C  | 4.62725  | 0.54703  | 0.59782  |
| C  | 4.95506  | 1.89640  | 0.54766  |
| H  | 4.15630  | 3.88286  | 0.49657  |
| H  | 5.42380  | -0.18968 | 0.64209  |
| C  | -1.94941 | -1.97503 | -1.90207 |
| C  | -3.01212 | -2.17576 | -2.81102 |
| C  | -1.48299 | -3.04185 | -1.10719 |
| C  | -3.56386 | -3.44464 | -2.91321 |
| C  | -2.07532 | -4.28760 | -1.26624 |
| C  | -3.10698 | -4.51809 | -2.16360 |
| H  | -4.38393 | -3.59335 | -3.60857 |
| H  | -1.71383 | -5.10770 | -0.65441 |
| C  | -3.58800 | -1.10983 | -3.69582 |

|    |          |          |          |
|----|----------|----------|----------|
| H  | -3.70107 | -0.14719 | -3.19665 |
| H  | -2.95748 | -0.94976 | -4.57403 |
| H  | -4.57436 | -1.41699 | -4.04456 |
| C  | -0.38950 | -2.92936 | -0.08998 |
| H  | 0.55487  | -2.63313 | -0.54832 |
| H  | -0.62484 | -2.19787 | 0.68560  |
| H  | -0.24074 | -3.89397 | 0.39526  |
| C  | -3.69613 | -5.88272 | -2.32946 |
| H  | -3.16090 | -6.43615 | -3.10738 |
| H  | -3.62503 | -6.46279 | -1.40812 |
| H  | -4.74441 | -5.83113 | -2.62783 |
| C  | 3.02951  | -1.36766 | 0.63583  |
| H  | 2.16500  | -1.59695 | 1.26497  |
| H  | 2.82813  | -1.77598 | -0.35930 |
| H  | 3.88795  | -1.90574 | 1.04020  |
| C  | 1.51201  | 3.47280  | 0.45049  |
| H  | 1.15331  | 3.58715  | -0.57725 |
| H  | 0.64644  | 3.21598  | 1.07140  |
| H  | 1.88260  | 4.44456  | 0.77868  |
| C  | 6.37845  | 2.34646  | 0.46786  |
| H  | 6.61137  | 2.64004  | -0.56058 |
| H  | 6.55884  | 3.21561  | 1.10401  |
| H  | 7.06843  | 1.55326  | 0.75895  |
| Cl | -2.67055 | 0.76849  | -0.86021 |
| S  | -0.75151 | 0.45606  | -3.60854 |

**R = Mes\***

|    |          |          |          |
|----|----------|----------|----------|
| P  | -0.31651 | 1.58440  | 1.45279  |
| C  | 0.23100  | 0.47217  | 0.32987  |
| P  | 1.82931  | -0.26199 | 0.12041  |
| Cl | -1.16943 | 0.77956  | -2.70954 |
| C  | 3.53611  | 0.39308  | 0.17743  |
| C  | 4.15716  | 0.66595  | -1.07878 |
| C  | 4.36737  | 0.14277  | 1.30252  |
| C  | 5.46907  | 0.24878  | -1.24025 |
| C  | 5.67971  | -0.24577 | 1.05558  |
| C  | 6.22466  | -0.31119 | -0.21707 |
| H  | 5.92928  | 0.39419  | -2.20960 |
| H  | 6.30001  | -0.49478 | 1.90523  |
| C  | -2.11156 | 1.63568  | 1.09595  |
| C  | -2.63239 | 2.65227  | 0.26353  |
| C  | -2.96706 | 0.61618  | 1.59304  |
| C  | -3.90093 | 2.45794  | -0.27750 |
| C  | -4.21277 | 0.48409  | 0.99375  |
| C  | -4.67637 | 1.34574  | 0.00696  |
| H  | -4.29054 | 3.19729  | -0.95843 |
| H  | -4.84983 | -0.33080 | 1.30299  |
| C  | -1.92956 | 4.00581  | 0.03932  |
| C  | -2.68605 | -0.18325 | 2.88401  |
| C  | -6.01065 | 1.06997  | -0.67700 |
| C  | 4.03627  | 0.47188  | 2.77226  |
| C  | 3.60104  | 1.58294  | -2.18736 |
| C  | 7.61560  | -0.86251 | -0.49931 |
| C  | -3.80055 | -1.18909 | 3.18637  |
| H  | -3.56425 | -1.70005 | 4.12246  |
| H  | -4.76868 | -0.70231 | 3.32131  |
| H  | -3.89244 | -1.95028 | 2.40723  |
| C  | -2.65686 | 0.83751  | 4.03317  |
| H  | -1.84110 | 1.55653  | 3.91395  |
| H  | -3.59331 | 1.39783  | 4.08392  |
| H  | -2.51307 | 0.32213  | 4.98719  |
| C  | -1.37580 | -0.97026 | 2.90835  |
| H  | -1.27119 | -1.62047 | 2.03770  |
| H  | -0.49373 | -0.32614 | 2.96418  |
| H  | -1.35462 | -1.59541 | 3.80508  |
| C  | -7.12905 | 1.00033  | 0.36952  |

|    |          |          |          |
|----|----------|----------|----------|
| H  | -8.08654 | 0.80518  | -0.12106 |
| H  | -6.96095 | 0.20027  | 1.09260  |
| H  | -7.21344 | 1.94199  | 0.91846  |
| C  | -6.37418 | 2.14965  | -1.69293 |
| H  | -7.32398 | 1.89392  | -2.16846 |
| H  | -6.49466 | 3.13048  | -1.22454 |
| H  | -5.62282 | 2.23251  | -2.48220 |
| C  | -5.91543 | -0.27356 | -1.41099 |
| H  | -5.13510 | -0.24515 | -2.17540 |
| H  | -5.68257 | -1.09864 | -0.73511 |
| H  | -6.86621 | -0.49879 | -1.90252 |
| C  | -2.76858 | 4.95135  | -0.82352 |
| H  | -3.74957 | 5.14844  | -0.38632 |
| H  | -2.24722 | 5.90801  | -0.90345 |
| H  | -2.90841 | 4.56676  | -1.83652 |
| C  | -1.75250 | 4.68029  | 1.40767  |
| H  | -2.71624 | 4.81160  | 1.90499  |
| H  | -1.10943 | 4.09720  | 2.07191  |
| H  | -1.29312 | 5.66527  | 1.28383  |
| C  | -0.56652 | 3.88927  | -0.64251 |
| H  | 0.18352  | 3.42294  | 0.00328  |
| H  | -0.62265 | 3.30631  | -1.56235 |
| H  | -0.18886 | 4.88847  | -0.87899 |
| C  | 2.64447  | 1.04808  | 2.99216  |
| H  | 2.44011  | 1.87380  | 2.30691  |
| H  | 1.85265  | 0.30741  | 2.90160  |
| H  | 2.57730  | 1.45018  | 4.00595  |
| C  | 5.01499  | 1.60418  | 3.15336  |
| H  | 4.80704  | 1.92779  | 4.17668  |
| H  | 6.05661  | 1.28563  | 3.10601  |
| H  | 4.89395  | 2.46601  | 2.49270  |
| C  | 4.26891  | -0.70087 | 3.72775  |
| H  | 5.28804  | -1.08596 | 3.66154  |
| H  | 4.11231  | -0.36592 | 4.75642  |
| H  | 3.58320  | -1.52458 | 3.53368  |
| C  | 2.24494  | 2.19837  | -1.86879 |
| H  | 2.03422  | 2.98749  | -2.59472 |
| H  | 1.42016  | 1.49348  | -1.93932 |
| H  | 2.24256  | 2.65822  | -0.87762 |
| C  | 3.55974  | 0.91613  | -3.56361 |
| H  | 2.83444  | 0.10416  | -3.59303 |
| H  | 3.27143  | 1.65492  | -4.31579 |
| H  | 4.53425  | 0.51628  | -3.85159 |
| C  | 4.58615  | 2.77046  | -2.25516 |
| H  | 4.66499  | 3.27173  | -1.28731 |
| H  | 5.58772  | 2.46703  | -2.56123 |
| H  | 4.21771  | 3.49620  | -2.98480 |
| C  | 8.27374  | -1.43856 | 0.75148  |
| H  | 8.45154  | -0.67258 | 1.51070  |
| H  | 7.67101  | -2.23396 | 1.19677  |
| H  | 9.24365  | -1.86625 | 0.48782  |
| C  | 8.51355  | 0.25186  | -1.05019 |
| H  | 8.12603  | 0.66413  | -1.98383 |
| H  | 8.60809  | 1.07092  | -0.33305 |
| H  | 9.51378  | -0.14088 | -1.25127 |
| C  | 7.49508  | -1.98078 | -1.54208 |
| H  | 6.86898  | -2.79610 | -1.17219 |
| H  | 7.05700  | -1.61901 | -2.47438 |
| H  | 8.48385  | -2.38698 | -1.77109 |
| Ge | -0.73746 | -0.60959 | -1.06275 |
| Au | -2.32090 | -2.28140 | -0.62239 |
| Cl | -3.92575 | -3.82336 | -0.07270 |
| Cl | 1.89993  | -1.79592 | 1.47641  |
| S  | 1.50370  | -1.21701 | -1.62817 |

### Coordination through S atom

#### R = H

|    |          |          |          |
|----|----------|----------|----------|
| P  | 0.55384  | 0.18513  | 0.72298  |
| C  | 0.29881  | 0.26732  | -0.91382 |
| P  | -1.20860 | 0.54045  | -1.72220 |
| Ge | 1.55521  | 0.48257  | -2.57201 |
| Cl | 0.95409  | -1.43527 | -3.52419 |
| Au | -1.96233 | 1.46360  | -4.92101 |
| Cl | -3.30319 | 1.12471  | -6.69410 |
| H  | -1.66359 | -0.64888 | -2.30594 |
| H  | 1.97559  | 0.02390  | 0.67438  |
| Cl | -2.79050 | 1.10593  | -0.62234 |
| S  | -0.61781 | 1.86614  | -3.13616 |

#### R = Me

|    |          |          |          |
|----|----------|----------|----------|
| P  | 0.56302  | 0.20397  | 0.72679  |
| C  | 0.28748  | 0.34193  | -0.90389 |
| P  | -1.27143 | 0.51871  | -1.63879 |
| Ge | 1.51076  | 0.74462  | -2.54514 |
| Cl | 1.35208  | -1.25653 | -3.51743 |
| C  | -1.97008 | -1.03813 | -2.17861 |
| H  | -2.16938 | -1.64839 | -1.29537 |
| H  | -2.89164 | -0.84466 | -2.72931 |
| H  | -1.23669 | -1.52523 | -2.82452 |
| C  | 2.37988  | -0.00800 | 0.84942  |
| H  | 2.60103  | -1.08010 | 0.84094  |
| H  | 2.92458  | 0.46624  | 0.03054  |
| H  | 2.72496  | 0.39333  | 1.80398  |
| Au | -2.02049 | 1.15991  | -4.97878 |
| Cl | -3.27488 | 0.60655  | -6.76415 |
| Cl | -2.70975 | 1.31161  | -0.45528 |
| S  | -0.77672 | 1.76592  | -3.17606 |

#### R = t-Bu

|    |          |          |          |
|----|----------|----------|----------|
| P  | 0.63953  | -0.16224 | 0.52923  |
| C  | 0.20369  | 0.48658  | -0.94163 |
| P  | -1.46855 | 0.38520  | -1.45538 |
| Ge | 1.01109  | 1.81325  | -2.34853 |
| Cl | 1.67751  | 0.33119  | -3.87845 |
| Au | -2.54741 | 1.46314  | -4.74453 |
| Cl | -3.55937 | 1.08192  | -6.72222 |
| C  | -2.02994 | -1.27423 | -2.08031 |
| C  | -3.49632 | -1.19091 | -2.49682 |
| C  | -1.15133 | -1.67234 | -3.26277 |
| C  | -1.86342 | -2.28009 | -0.94144 |
| H  | -4.15076 | -0.95512 | -1.65703 |
| H  | -3.65893 | -0.46002 | -3.29230 |
| H  | -3.78666 | -2.16881 | -2.88971 |
| H  | -0.09562 | -1.72609 | -2.99511 |
| H  | -1.47254 | -2.66272 | -3.59671 |
| H  | -1.25677 | -0.98651 | -4.10480 |
| H  | -2.19624 | -3.25287 | -1.31329 |
| H  | -0.82296 | -2.38334 | -0.62935 |
| H  | -2.46890 | -2.02847 | -0.06986 |
| C  | 2.48764  | -0.03817 | 0.75181  |
| C  | 2.97405  | -1.49171 | 0.69442  |
| C  | 3.23660  | 0.80892  | -0.25928 |
| C  | 2.68974  | 0.51139  | 2.16738  |
| H  | 2.43300  | -2.13375 | 1.39550  |
| H  | 2.86925  | -1.91146 | -0.30879 |
| H  | 4.03424  | -1.52680 | 0.96605  |
| H  | 2.90856  | 1.85139  | -0.23973 |
| H  | 4.30649  | 0.80505  | -0.02378 |
| H  | 3.13386  | 0.41624  | -1.27460 |

|    |          |          |          |
|----|----------|----------|----------|
| H  | 3.75265  | 0.47178  | 2.42510  |
| H  | 2.36381  | 1.55146  | 2.24757  |
| H  | 2.14377  | -0.07317 | 2.91279  |
| Cl | -2.76198 | 0.78799  | 0.06408  |
| S  | -1.52712 | 1.95215  | -2.77159 |

**R = Ph**

|    |          |          |          |
|----|----------|----------|----------|
| P  | 0.44416  | -0.04844 | 0.87282  |
| C  | 0.16022  | 0.23173  | -0.74429 |
| P  | -1.41828 | 0.30584  | -1.46152 |
| Ge | 1.34488  | 1.11951  | -2.19816 |
| Cl | 1.60858  | -0.61910 | -3.57802 |
| Au | -2.47052 | 1.73877  | -4.57231 |
| Cl | -3.80830 | 1.72423  | -6.38579 |
| C  | -1.93657 | -1.25751 | -2.17744 |
| C  | -2.44427 | -2.24046 | -1.32615 |
| C  | -1.76871 | -1.51812 | -3.53302 |
| C  | -2.79261 | -3.47528 | -1.84116 |
| H  | -2.57675 | -2.04115 | -0.26935 |
| C  | -2.12750 | -2.75767 | -4.03895 |
| H  | -1.36280 | -0.76366 | -4.19400 |
| C  | -2.63805 | -3.73256 | -3.19762 |
| H  | -3.19355 | -4.23665 | -1.18274 |
| H  | -2.00857 | -2.95339 | -5.09757 |
| H  | -2.92057 | -4.69902 | -3.59888 |
| C  | 2.24458  | -0.06105 | 0.99578  |
| C  | 3.09899  | -0.49693 | -0.02291 |
| C  | 2.79389  | 0.37530  | 2.20525  |
| C  | 4.47219  | -0.45692 | 0.15487  |
| H  | 2.68879  | -0.91752 | -0.93572 |
| C  | 4.16732  | 0.42432  | 2.37425  |
| H  | 2.13768  | 0.68997  | 3.01087  |
| C  | 5.00625  | 0.01188  | 1.34771  |
| H  | 5.12686  | -0.80129 | -0.63721 |
| H  | 4.58516  | 0.77885  | 3.30927  |
| H  | 6.08129  | 0.04193  | 1.48326  |
| Cl | -2.88912 | 0.75511  | -0.13761 |
| S  | -1.11177 | 1.84091  | -2.75557 |

**R = Mes**

|    |          |          |          |
|----|----------|----------|----------|
| P  | 0.14435  | 0.66904  | 0.42163  |
| C  | 0.07182  | 0.05350  | -1.12015 |
| P  | -1.25892 | -0.04799 | -2.23118 |
| Ge | 1.69886  | -0.06902 | -2.40973 |
| Cl | 1.56227  | -2.28072 | -2.85859 |
| Au | 0.12341  | 2.83342  | -3.27353 |
| Cl | 0.65112  | 4.96009  | -2.72526 |
| C  | -1.97193 | -1.70507 | -2.37367 |
| C  | -2.43503 | -2.29423 | -1.17410 |
| C  | -2.09221 | -2.40874 | -3.59377 |
| C  | -2.96387 | -3.57708 | -1.21961 |
| C  | -2.63108 | -3.68784 | -3.56285 |
| C  | -3.05974 | -4.30094 | -2.39572 |
| H  | -3.32049 | -4.01678 | -0.29356 |
| H  | -2.72265 | -4.22307 | -4.50229 |
| C  | 1.93140  | 0.59782  | 0.77741  |
| C  | 2.62998  | 1.81301  | 0.86193  |
| C  | 2.57680  | -0.61937 | 1.05690  |
| C  | 3.98212  | 1.78443  | 1.17805  |
| C  | 3.92891  | -0.59311 | 1.37186  |
| C  | 4.65221  | 0.59343  | 1.42474  |
| H  | 4.52451  | 2.72352  | 1.23553  |
| H  | 4.43051  | -1.53007 | 1.59534  |
| C  | 1.95144  | 3.12101  | 0.59054  |
| H  | 1.83705  | 3.31066  | -0.48118 |
| H  | 0.94585  | 3.15586  | 1.02420  |

|    |          |          |          |
|----|----------|----------|----------|
| H  | 2.52166  | 3.95180  | 1.00790  |
| C  | 1.84388  | -1.92962 | 1.06190  |
| H  | 0.93050  | -1.87250 | 1.66254  |
| H  | 1.55272  | -2.24292 | 0.05583  |
| H  | 2.47028  | -2.71511 | 1.48620  |
| C  | 6.11807  | 0.58457  | 1.73040  |
| H  | 6.70172  | 0.47043  | 0.81150  |
| H  | 6.43231  | 1.51668  | 2.20289  |
| H  | 6.38334  | -0.24366 | 2.38995  |
| C  | -2.40051 | -1.64050 | 0.17520  |
| H  | -1.42192 | -1.76931 | 0.64428  |
| H  | -2.61409 | -0.57309 | 0.15301  |
| H  | -3.14117 | -2.10787 | 0.82486  |
| C  | -1.68749 | -1.89739 | -4.94352 |
| H  | -2.12425 | -0.92559 | -5.17451 |
| H  | -0.60278 | -1.80342 | -5.02428 |
| H  | -2.01717 | -2.60104 | -5.70788 |
| C  | -3.59925 | -5.69552 | -2.40952 |
| H  | -4.25413 | -5.87941 | -1.55669 |
| H  | -4.15670 | -5.89767 | -3.32579 |
| H  | -2.78062 | -6.42020 | -2.35967 |
| Cl | -2.84001 | 1.17225  | -1.82180 |
| S  | -0.32211 | 0.67667  | -3.91562 |

**R = Mes\***

|   |          |          |          |
|---|----------|----------|----------|
| P | -2.04108 | 1.89965  | 0.25708  |
| C | -1.10123 | 0.52480  | 0.20665  |
| P | 0.64165  | 0.39204  | 0.27366  |
| C | -3.73050 | 1.17616  | 0.29444  |
| C | -4.53426 | 1.25964  | -0.87637 |
| C | -4.17734 | 0.40844  | 1.39172  |
| C | -5.59673 | 0.37953  | -0.99423 |
| C | -5.24394 | -0.47060 | 1.18298  |
| C | -5.92904 | -0.55112 | -0.01291 |
| H | -6.18858 | 0.39880  | -1.89733 |
| H | -5.55527 | -1.09632 | 2.00791  |
| C | -3.74962 | 0.57751  | 2.86624  |
| C | -4.31583 | 2.31293  | -1.97865 |
| C | -7.04234 | -1.56078 | -0.26766 |
| C | -3.01623 | 2.08637  | -2.75386 |
| H | -2.12919 | 2.24301  | -2.13472 |
| H | -2.96140 | 1.07194  | -3.15189 |
| H | -2.95244 | 2.79745  | -3.58286 |
| C | -4.31191 | 3.71170  | -1.34623 |
| H | -5.25129 | 3.90188  | -0.82145 |
| H | -3.49456 | 3.84776  | -0.63511 |
| H | -4.19647 | 4.47092  | -2.12478 |
| C | -5.44677 | 2.30177  | -3.01035 |
| H | -5.47206 | 1.37341  | -3.58559 |
| H | -6.42568 | 2.45624  | -2.55052 |
| H | -5.28178 | 3.11749  | -3.71784 |
| C | -3.28953 | -0.74408 | 3.48833  |
| H | -2.38119 | -1.11549 | 3.00906  |
| H | -3.07347 | -0.59645 | 4.55004  |
| H | -4.04842 | -1.52428 | 3.41164  |
| C | -2.66551 | 1.61919  | 3.12394  |
| H | -1.67839 | 1.28138  | 2.81163  |
| H | -2.88845 | 2.57820  | 2.64378  |
| H | -2.60878 | 1.81290  | 4.19893  |
| C | -4.99914 | 1.07224  | 3.62053  |
| H | -5.34867 | 2.02370  | 3.21176  |
| H | -5.82398 | 0.36142  | 3.56482  |
| H | -4.75570 | 1.22259  | 4.67588  |
| C | -7.24988 | -2.50354 | 0.91445  |
| H | -7.56757 | -1.96906 | 1.81364  |
| H | -8.03220 | -3.22606 | 0.67052  |

|    |          |          |          |
|----|----------|----------|----------|
| H  | -6.34237 | -3.06578 | 1.14829  |
| C  | -6.67438 | -2.40295 | -1.49565 |
| H  | -6.56311 | -1.78660 | -2.38982 |
| H  | -5.73156 | -2.93212 | -1.34045 |
| H  | -7.45690 | -3.14118 | -1.69196 |
| C  | -8.35933 | -0.82213 | -0.53293 |
| H  | -8.28827 | -0.16361 | -1.40092 |
| H  | -9.16036 | -1.54107 | -0.72588 |
| H  | -8.64815 | -0.21401 | 0.32805  |
| C  | 2.04762  | 1.44876  | -0.18563 |
| C  | 2.67348  | 1.14140  | -1.42656 |
| C  | 2.81462  | 2.10394  | 0.82244  |
| C  | 4.06296  | 1.09130  | -1.44272 |
| C  | 4.19200  | 2.02123  | 0.72227  |
| C  | 4.84469  | 1.40787  | -0.34358 |
| H  | 4.54675  | 0.78921  | -2.36104 |
| H  | 4.78793  | 2.46613  | 1.50944  |
| C  | 1.97871  | 1.07085  | -2.80076 |
| C  | 2.31013  | -0.19735 | -3.59004 |
| C  | 2.53882  | 2.28334  | -3.57716 |
| H  | 1.89577  | -1.08552 | -3.11482 |
| H  | 1.88223  | -0.11966 | -4.59293 |
| H  | 3.38586  | -0.34297 | -3.70162 |
| H  | 2.33094  | 3.21780  | -3.04992 |
| H  | 3.61605  | 2.21390  | -3.73081 |
| H  | 2.05919  | 2.33136  | -4.55839 |
| C  | 2.26572  | 3.07948  | 1.88301  |
| C  | 2.85162  | 4.45514  | 1.49950  |
| C  | 2.72148  | 2.74728  | 3.30574  |
| H  | 2.56219  | 4.73476  | 0.48369  |
| H  | 2.46601  | 5.21451  | 2.18527  |
| H  | 3.94034  | 4.47082  | 1.55633  |
| H  | 2.31363  | 1.79859  | 3.65229  |
| H  | 3.80877  | 2.69377  | 3.38291  |
| H  | 2.38273  | 3.53146  | 3.98805  |
| C  | 6.35097  | 1.19849  | -0.30674 |
| C  | 7.05802  | 2.55690  | -0.22605 |
| C  | 6.85800  | 0.45552  | -1.53977 |
| H  | 6.77335  | 3.11213  | 0.67033  |
| H  | 8.14081  | 2.40968  | -0.19446 |
| H  | 6.82459  | 3.17610  | -1.09607 |
| H  | 6.37491  | -0.51845 | -1.64742 |
| H  | 6.70439  | 1.02873  | -2.45817 |
| H  | 7.93197  | 0.28250  | -1.44103 |
| Cl | -2.43315 | -1.56869 | -1.92584 |
| Cl | 0.98834  | -0.04854 | 2.24403  |
| Au | 2.74227  | -2.39295 | 0.08661  |
| Cl | 4.71939  | -3.30536 | 0.70201  |
| C  | 0.75294  | 3.25834  | 1.85437  |
| H  | 0.39468  | 3.48744  | 0.84828  |
| H  | 0.21065  | 2.39507  | 2.23393  |
| H  | 0.48141  | 4.10194  | 2.49394  |
| C  | 0.46788  | 1.26985  | -2.76541 |
| H  | -0.08123 | 0.41039  | -2.38330 |
| H  | 0.19921  | 2.15463  | -2.18249 |
| H  | 0.11152  | 1.43215  | -3.78570 |
| C  | 6.69637  | 0.36358  | 0.93355  |
| H  | 6.39292  | 0.86492  | 1.85527  |
| H  | 6.20766  | -0.61318 | 0.90203  |
| H  | 7.77707  | 0.20465  | 0.98110  |
| Ge | -1.64876 | -1.49925 | 0.17454  |
| S  | 0.81337  | -1.43050 | -0.64329 |

### Coordination through P(sp<sup>2</sup>) atom

#### R = H

|    |          |          |          |
|----|----------|----------|----------|
| P  | 0.40495  | 0.26580  | 0.51080  |
| C  | 0.14573  | 0.12163  | -1.09943 |
| P  | -1.33747 | 0.05230  | -1.99457 |
| Ge | 1.39965  | 0.36795  | -2.77792 |
| Cl | 1.28785  | -1.78964 | -3.36996 |
| Au | -0.91505 | 0.36172  | 2.26140  |
| Cl | -2.25557 | 0.46033  | 4.06902  |
| H  | 1.80965  | 0.34850  | 0.63747  |
| H  | -1.64780 | -1.29531 | -2.23667 |
| Cl | -3.00036 | 0.66029  | -1.04067 |
| S  | -0.88658 | 1.06576  | -3.63239 |

#### R = Me

|    |          |          |          |
|----|----------|----------|----------|
| P  | 0.47566  | 0.36556  | 0.49074  |
| C  | 0.13926  | 0.20867  | -1.10405 |
| P  | -1.40238 | 0.02837  | -1.88537 |
| Ge | 1.30337  | 0.39334  | -2.84065 |
| Cl | 1.50442  | -1.82535 | -3.17314 |
| C  | -1.94753 | -1.67900 | -1.85727 |
| H  | -2.14355 | -1.98082 | -0.82694 |
| H  | -2.85447 | -1.76859 | -2.45702 |
| H  | -1.14554 | -2.28098 | -2.29027 |
| C  | 2.26229  | 0.47245  | 0.74373  |
| H  | 2.59512  | -0.44301 | 1.24008  |
| H  | 2.79529  | 0.59118  | -0.19981 |
| H  | 2.47709  | 1.31046  | 1.40964  |
| Au | -0.88211 | 0.38945  | 2.22430  |
| Cl | -2.25799 | 0.37649  | 4.01486  |
| Cl | -2.91766 | 1.02427  | -0.98552 |
| S  | -1.01524 | 0.72006  | -3.71134 |

#### R = t-Bu

|    |          |          |          |
|----|----------|----------|----------|
| P  | 0.66299  | -0.23996 | 0.47562  |
| C  | 0.13912  | 0.32592  | -0.97850 |
| P  | -1.50694 | 0.20511  | -1.57105 |
| Ge | 0.86609  | 1.72201  | -2.39008 |
| Cl | 1.73386  | 0.26717  | -3.87195 |
| C  | -2.01622 | -1.46684 | -2.19053 |
| C  | -3.42250 | -1.32701 | -2.77258 |
| C  | -1.03173 | -1.87343 | -3.28516 |
| C  | -2.00014 | -2.48635 | -1.05742 |
| H  | -4.16094 | -1.08113 | -2.00826 |
| H  | -3.46224 | -0.57097 | -3.55941 |
| H  | -3.70192 | -2.28654 | -3.21581 |
| H  | -0.01129 | -1.96319 | -2.91048 |
| H  | -1.34110 | -2.84886 | -3.67080 |
| H  | -1.02358 | -1.16432 | -4.11343 |
| H  | -2.32538 | -3.44868 | -1.46267 |
| H  | -0.99871 | -2.62712 | -0.64694 |
| H  | -2.67579 | -2.22107 | -0.24337 |
| C  | 2.47647  | -0.04779 | 0.78641  |
| C  | 3.02599  | -1.47438 | 0.90611  |
| C  | 3.20209  | 0.70955  | -0.31287 |
| C  | 2.61938  | 0.67514  | 2.12863  |
| H  | 2.50240  | -2.05146 | 1.67221  |
| H  | 2.96063  | -2.01341 | -0.04171 |
| H  | 4.08086  | -1.41842 | 1.19152  |
| H  | 2.85569  | 1.74278  | -0.39296 |
| H  | 4.26922  | 0.74481  | -0.07266 |
| H  | 3.10129  | 0.22316  | -1.28550 |
| H  | 3.67994  | 0.71723  | 2.39353  |
| H  | 2.24214  | 1.69921  | 2.08013  |

|    |          |          |          |
|----|----------|----------|----------|
| H  | 2.09315  | 0.15291  | 2.93113  |
| Cl | -2.86134 | 0.62065  | -0.11175 |
| Au | -0.51553 | -1.21128 | 2.07949  |
| Cl | -1.69333 | -2.21127 | 3.73470  |
| S  | -1.55277 | 1.60530  | -2.99109 |

**R = Ph**

|    |          |          |          |
|----|----------|----------|----------|
| P  | 0.47361  | 0.56891  | 0.11707  |
| C  | 0.34035  | 0.02702  | -1.42883 |
| P  | -1.12657 | -0.28581 | -2.31223 |
| Ge | 1.69179  | -0.11914 | -3.01870 |
| Cl | 2.06893  | -2.34105 | -2.87864 |
| Au | -1.12110 | 1.19068  | 1.51404  |
| Cl | -2.76256 | 1.77794  | 2.95523  |
| Cl | -2.57534 | 1.07991  | -1.92968 |
| C  | 2.17699  | 0.62716  | 0.63787  |
| C  | 3.15623  | -0.20677 | 0.09002  |
| C  | 2.51840  | 1.53943  | 1.63988  |
| C  | 4.46606  | -0.10124 | 0.52422  |
| H  | 2.88933  | -0.96574 | -0.63733 |
| C  | 3.83230  | 1.64265  | 2.06126  |
| H  | 1.75171  | 2.16787  | 2.08115  |
| C  | 4.80531  | 0.82596  | 1.50102  |
| H  | 5.22284  | -0.75350 | 0.10483  |
| H  | 4.09670  | 2.35704  | 2.83174  |
| H  | 5.83293  | 0.90303  | 1.83733  |
| C  | -1.87515 | -1.85414 | -1.85431 |
| C  | -1.61460 | -2.97954 | -2.63001 |
| C  | -2.65041 | -1.95333 | -0.69896 |
| C  | -2.13871 | -4.20536 | -2.25016 |
| H  | -1.00226 | -2.89426 | -3.51920 |
| C  | -3.16651 | -3.18231 | -0.32894 |
| H  | -2.85865 | -1.07801 | -0.09431 |
| C  | -2.91186 | -4.30666 | -1.10411 |
| H  | -1.93868 | -5.08255 | -2.85380 |
| H  | -3.77266 | -3.26042 | 0.56570  |
| H  | -3.32094 | -5.26684 | -0.81120 |
| S  | -0.51141 | -0.19511 | -4.20201 |

**R = Mes**

|    |          |          |          |
|----|----------|----------|----------|
| P  | 0.51993  | 0.55454  | 0.63997  |
| C  | 0.42469  | -0.26154 | -0.78234 |
| P  | -0.92456 | -0.48313 | -1.87126 |
| Ge | 2.01237  | -0.48879 | -2.11711 |
| Cl | 1.98381  | -2.74981 | -2.09680 |
| Au | -1.07702 | 1.25867  | 1.99161  |
| Cl | -2.68466 | 1.94991  | 3.42595  |
| C  | 2.25371  | 0.80101  | 1.06269  |
| C  | 2.99513  | -0.23066 | 1.65436  |
| C  | 2.82204  | 2.06584  | 0.83664  |
| C  | 4.31503  | 0.02585  | 2.00374  |
| C  | 4.14420  | 2.26774  | 1.20070  |
| C  | 4.90702  | 1.26294  | 1.78683  |
| H  | 4.89587  | -0.76801 | 2.46313  |
| H  | 4.59229  | 3.24041  | 1.02155  |
| C  | -1.81704 | -2.05371 | -1.88786 |
| C  | -1.71822 | -2.99198 | -0.84048 |
| C  | -2.65392 | -2.31262 | -2.99615 |
| C  | -2.42710 | -4.18051 | -0.95112 |
| C  | -3.34051 | -3.51814 | -3.03873 |
| C  | -3.23403 | -4.47305 | -2.03980 |
| H  | -2.34734 | -4.90037 | -0.14299 |
| H  | -3.98668 | -3.70989 | -3.88956 |
| C  | 2.03867  | 3.17211  | 0.19768  |
| H  | 1.77826  | 2.92956  | -0.83719 |
| H  | 1.10200  | 3.36432  | 0.73090  |

|    |          |          |          |
|----|----------|----------|----------|
| H  | 2.61211  | 4.09921  | 0.18814  |
| C  | 2.40781  | -1.58624 | 1.90383  |
| H  | 1.39274  | -1.52189 | 2.30733  |
| H  | 2.35789  | -2.17025 | 0.97956  |
| H  | 3.01442  | -2.14473 | 2.61740  |
| C  | 6.32280  | 1.52249  | 2.19860  |
| H  | 6.35437  | 2.06422  | 3.14892  |
| H  | 6.87713  | 0.59233  | 2.32955  |
| H  | 6.84489  | 2.13365  | 1.45972  |
| C  | -0.90575 | -2.79607 | 0.40130  |
| H  | 0.15471  | -2.69583 | 0.16726  |
| H  | -1.21698 | -1.90904 | 0.95741  |
| H  | -1.02768 | -3.65728 | 1.05825  |
| C  | -2.86242 | -1.37615 | -4.15023 |
| H  | -2.95636 | -0.33297 | -3.84802 |
| H  | -2.03212 | -1.43518 | -4.85766 |
| H  | -3.77598 | -1.64983 | -4.67918 |
| C  | -3.95598 | -5.77944 | -2.13704 |
| H  | -4.86024 | -5.69168 | -2.74121 |
| H  | -3.31764 | -6.53354 | -2.60800 |
| H  | -4.23259 | -6.15606 | -1.15088 |
| Cl | -2.38558 | 0.88783  | -1.47080 |
| S  | 0.03726  | -0.05967 | -3.57882 |

**R = Mes\***

|    |          |          |          |
|----|----------|----------|----------|
| P  | -1.10410 | 0.77572  | 0.12485  |
| C  | -0.37231 | -0.68442 | 0.33634  |
| P  | 1.29132  | -1.22826 | 0.46696  |
| Cl | -2.04971 | -2.69047 | -1.78087 |
| C  | 2.91634  | -0.49582 | 0.06998  |
| C  | 3.47690  | -0.90038 | -1.18065 |
| C  | 3.79053  | -0.03560 | 1.09326  |
| C  | 4.82740  | -1.20982 | -1.20069 |
| C  | 5.13341  | -0.38659 | 0.98647  |
| C  | 5.66150  | -1.06339 | -0.09973 |
| H  | 5.25056  | -1.56582 | -2.13134 |
| H  | 5.79353  | -0.09465 | 1.79075  |
| C  | -2.89247 | 0.45982  | 0.16895  |
| C  | -3.65887 | 0.41563  | -1.02636 |
| C  | -3.44901 | -0.01066 | 1.38555  |
| C  | -4.83849 | -0.31902 | -1.00086 |
| C  | -4.61470 | -0.76406 | 1.30924  |
| C  | -5.29649 | -0.98738 | 0.12461  |
| H  | -5.40868 | -0.40135 | -1.91096 |
| H  | -5.01190 | -1.18419 | 2.22431  |
| C  | -3.31909 | 1.19830  | -2.30864 |
| C  | -2.97106 | 0.33415  | 2.81312  |
| C  | -6.51610 | -1.90173 | 0.10323  |
| C  | 3.47795  | 0.99173  | 2.20370  |
| C  | 2.79549  | -0.82793 | -2.56409 |
| C  | 7.10544  | -1.54388 | -0.15861 |
| C  | -4.17979 | 0.90566  | 3.57912  |
| H  | -3.86157 | 1.20751  | 4.58021  |
| H  | -4.58457 | 1.78455  | 3.07167  |
| H  | -4.98743 | 0.18372  | 3.69746  |
| C  | -1.90053 | 1.42023  | 2.88759  |
| H  | -0.91523 | 1.07581  | 2.57142  |
| H  | -2.17084 | 2.30666  | 2.30771  |
| H  | -1.78742 | 1.73625  | 3.92820  |
| C  | -2.46668 | -0.91138 | 3.54608  |
| H  | -3.21976 | -1.70171 | 3.56248  |
| H  | -1.56888 | -1.31465 | 3.07434  |
| H  | -2.22021 | -0.66007 | 4.58165  |
| C  | -7.58833 | -1.36153 | 1.05642  |
| H  | -8.46238 | -2.01848 | 1.04756  |
| H  | -7.22795 | -1.30384 | 2.08550  |

|    |          |          |          |
|----|----------|----------|----------|
| H  | -7.91174 | -0.36159 | 0.75671  |
| C  | -7.12755 | -2.02058 | -1.29022 |
| H  | -7.97819 | -2.70531 | -1.25569 |
| H  | -7.49531 | -1.05950 | -1.65890 |
| H  | -6.41148 | -2.41811 | -2.01341 |
| C  | -6.08394 | -3.30102 | 0.55937  |
| H  | -5.31600 | -3.70672 | -0.10341 |
| H  | -5.67841 | -3.28856 | 1.57326  |
| H  | -6.94090 | -3.98022 | 0.54975  |
| C  | -4.37037 | 0.99379  | -3.40386 |
| H  | -5.36703 | 1.31023  | -3.08828 |
| H  | -4.09312 | 1.60519  | -4.26526 |
| H  | -4.41885 | -0.04468 | -3.74004 |
| C  | -3.32436 | 2.69490  | -1.96840 |
| H  | -4.30258 | 3.00016  | -1.58847 |
| H  | -2.57763 | 2.95370  | -1.21452 |
| H  | -3.10462 | 3.28425  | -2.86243 |
| C  | -1.98144 | 0.79592  | -2.93184 |
| H  | -1.12297 | 1.04276  | -2.30458 |
| H  | -1.94791 | -0.27343 | -3.14199 |
| H  | -1.83870 | 1.34604  | -3.86624 |
| C  | 2.04532  | 1.50717  | 2.23390  |
| H  | 1.71809  | 1.81022  | 1.23650  |
| H  | 1.33428  | 0.79548  | 2.64370  |
| H  | 2.00230  | 2.40070  | 2.86074  |
| C  | 4.33823  | 2.22648  | 1.85174  |
| H  | 4.15294  | 3.01140  | 2.58944  |
| H  | 5.40583  | 2.00555  | 1.85475  |
| H  | 4.07200  | 2.62135  | 0.86873  |
| C  | 3.87985  | 0.50721  | 3.59952  |
| H  | 4.93881  | 0.24880  | 3.65658  |
| H  | 3.70013  | 1.30653  | 4.32319  |
| H  | 3.30250  | -0.36397 | 3.90790  |
| C  | 1.35274  | -0.33932 | -2.55337 |
| H  | 1.05596  | -0.10875 | -3.57945 |
| H  | 0.64624  | -1.08100 | -2.18488 |
| H  | 1.25045  | 0.58317  | -1.97501 |
| C  | 2.87287  | -2.14739 | -3.33553 |
| H  | 2.29436  | -2.92844 | -2.84247 |
| H  | 2.46321  | -2.00388 | -4.33878 |
| H  | 3.90003  | -2.49979 | -3.44800 |
| C  | 3.58747  | 0.24554  | -3.34198 |
| H  | 3.55203  | 1.20847  | -2.82689 |
| H  | 4.63425  | -0.02635 | -3.48131 |
| H  | 3.13829  | 0.37348  | -4.33029 |
| C  | 7.84840  | -1.30557 | 1.15318  |
| H  | 7.94094  | -0.24122 | 1.38379  |
| H  | 7.35493  | -1.79983 | 1.99373  |
| H  | 8.85981  | -1.71134 | 1.07710  |
| C  | 7.85043  | -0.80674 | -1.27807 |
| H  | 7.40061  | -0.98927 | -2.25593 |
| H  | 7.85226  | 0.27201  | -1.10428 |
| H  | 8.88881  | -1.14626 | -1.32177 |
| C  | 7.11000  | -3.04951 | -0.45025 |
| H  | 6.59479  | -3.60287 | 0.33847  |
| H  | 6.61689  | -3.27955 | -1.39672 |
| H  | 8.13820  | -3.41655 | -0.50917 |
| Cl | 1.43221  | -1.65980 | 2.47905  |
| Au | -0.13343 | 2.74595  | -0.25101 |
| Cl | 0.88841  | 4.73695  | -0.63753 |
| Ge | -1.24633 | -2.63098 | 0.32575  |
| S  | 1.12356  | -3.04083 | -0.35681 |

### Coordination through $\pi(\text{C}=\text{P})$ bond

#### R = H

|    |          |          |          |
|----|----------|----------|----------|
| P  | 0.35501  | -0.10812 | 0.70139  |
| C  | 0.12830  | 0.51893  | -0.89323 |
| P  | -1.31906 | 0.48494  | -1.87039 |
| Ge | 1.39656  | 0.94751  | -2.54549 |
| Cl | 1.32299  | -1.15776 | -3.33347 |
| Au | 0.19914  | 2.23972  | 0.39055  |
| Cl | 0.24377  | 4.31826  | 1.23622  |
| H  | 1.78351  | -0.14506 | 0.67229  |
| H  | -1.51637 | -0.84028 | -2.28876 |
| Cl | -3.07584 | 0.84634  | -0.94252 |
| S  | -0.88229 | 1.71475  | -3.35561 |

#### R = Me

|    |          |          |          |
|----|----------|----------|----------|
| P  | 0.40701  | 0.06140  | 0.70115  |
| C  | 0.07869  | 0.67299  | -0.87985 |
| P  | -1.41701 | 0.51518  | -1.77788 |
| Ge | 1.28100  | 1.14367  | -2.56053 |
| Cl | 1.60410  | -1.00565 | -3.18852 |
| C  | -1.79956 | -1.21367 | -2.06624 |
| H  | -2.01772 | -1.70199 | -1.11502 |
| H  | -2.66542 | -1.27219 | -2.72708 |
| H  | -0.92855 | -1.66723 | -2.54433 |
| C  | 2.23020  | -0.12584 | 0.72153  |
| H  | 2.44585  | -1.16209 | 0.44041  |
| H  | 2.75232  | 0.53995  | 0.03399  |
| H  | 2.59321  | 0.03231  | 1.73871  |
| Au | 0.13505  | 2.40838  | 0.39145  |
| Cl | 0.16524  | 4.46779  | 1.29367  |
| Cl | -3.07759 | 1.19150  | -0.82092 |
| S  | -1.02456 | 1.53165  | -3.44177 |

#### R = *t*-Bu

|    |          |          |          |
|----|----------|----------|----------|
| P  | 0.54041  | 0.09381  | 0.52283  |
| C  | 0.04197  | 0.74293  | -1.00389 |
| P  | -1.54613 | 0.41190  | -1.71783 |
| Ge | 0.90843  | 1.69259  | -2.69872 |
| Cl | 1.87311  | -0.10878 | -3.66427 |
| Au | -0.03902 | 2.39742  | 0.40189  |
| Cl | -0.14982 | 4.36105  | 1.49858  |
| C  | -1.98399 | -1.38200 | -1.91222 |
| C  | -3.26204 | -1.44820 | -2.74843 |
| C  | -0.84130 | -2.07141 | -2.65362 |
| C  | -2.20504 | -2.03226 | -0.54948 |
| H  | -4.10680 | -0.97357 | -2.24660 |
| H  | -3.12862 | -0.98556 | -3.72786 |
| H  | -3.51081 | -2.50151 | -2.90394 |
| H  | 0.08886  | -2.05983 | -2.08401 |
| H  | -1.12545 | -3.11478 | -2.81701 |
| H  | -0.64506 | -1.61433 | -3.62374 |
| H  | -2.41956 | -3.09233 | -0.71187 |
| H  | -1.32247 | -1.96666 | 0.08985  |
| H  | -3.04970 | -1.59505 | -0.01667 |
| C  | 2.40515  | 0.07132  | 0.62389  |
| C  | 2.78098  | -1.33807 | 0.14896  |
| C  | 3.15897  | 1.11812  | -0.17783 |
| C  | 2.71716  | 0.21990  | 2.11499  |
| H  | 2.23507  | -2.11552 | 0.69229  |
| H  | 2.59837  | -1.46042 | -0.92112 |
| H  | 3.84802  | -1.50184 | 0.33066  |
| H  | 2.85843  | 2.13427  | 0.08685  |
| H  | 4.23062  | 1.02584  | 0.02949  |
| H  | 3.03687  | 0.97487  | -1.25344 |
| H  | 3.78748  | 0.06251  | 2.27798  |



|    |          |          |          |
|----|----------|----------|----------|
| H  | 2.46408  | 1.21788  | 2.48134  |
| H  | 2.17563  | -0.51203 | 2.72059  |
| Cl | -3.07892 | 1.13091  | -0.57625 |
| S  | -1.45263 | 1.39045  | -3.45147 |

**R = Ph**

|    |          |          |          |
|----|----------|----------|----------|
| P  | 0.27494  | 0.58089  | 0.51121  |
| C  | 0.13287  | 0.69275  | -1.20807 |
| P  | -1.35332 | 0.47072  | -2.11201 |
| Ge | 1.39966  | 0.84224  | -2.91313 |
| Cl | 1.62370  | -1.35577 | -3.39486 |
| Au | 0.30239  | 2.73943  | -0.50611 |
| Cl | 0.51238  | 4.96699  | -0.25411 |
| C  | -1.86086 | -1.25367 | -2.12669 |
| C  | -2.25519 | -1.86073 | -0.93463 |
| C  | -1.84909 | -1.97430 | -3.31458 |
| C  | -2.63569 | -3.19018 | -0.93858 |
| H  | -2.27214 | -1.29669 | -0.00830 |
| C  | -2.23762 | -3.30541 | -3.30957 |
| H  | -1.52794 | -1.49626 | -4.23158 |
| C  | -2.62800 | -3.91158 | -2.12633 |
| H  | -2.94188 | -3.66487 | -0.01392 |
| H  | -2.22795 | -3.86922 | -4.23467 |
| H  | -2.92812 | -4.95320 | -2.12583 |
| C  | 2.03058  | 0.29715  | 0.84597  |
| C  | 2.87154  | -0.44548 | 0.01567  |
| C  | 2.52054  | 0.79054  | 2.05859  |
| C  | 4.19015  | -0.66141 | 0.38260  |
| H  | 2.49224  | -0.88279 | -0.90117 |
| C  | 3.84279  | 0.58512  | 2.41153  |
| H  | 1.86571  | 1.35111  | 2.71852  |
| C  | 4.67858  | -0.13995 | 1.57246  |
| H  | 4.83735  | -1.24159 | -0.26487 |
| H  | 4.22160  | 0.98686  | 3.34402  |
| H  | 5.71242  | -0.30703 | 1.85230  |
| Cl | -2.95695 | 1.41341  | -1.28369 |
| S  | -0.88372 | 1.20321  | -3.89858 |

**R = Mes**

|    |          |          |          |
|----|----------|----------|----------|
| P  | 0.24666  | 0.48768  | 1.07895  |
| C  | -0.09571 | 0.68983  | -0.60987 |
| P  | -1.52610 | 0.50805  | -1.62663 |
| Ge | 1.24927  | 1.30286  | -2.14127 |
| Cl | 1.63717  | -0.66675 | -3.19212 |
| Au | -0.23823 | 2.67441  | 0.27251  |
| Cl | -0.47039 | 4.87692  | 0.72310  |
| C  | -1.86147 | -1.21994 | -2.05906 |
| C  | -2.14087 | -2.11585 | -1.00100 |
| C  | -1.83047 | -1.69853 | -3.39097 |
| C  | -2.26811 | -3.46954 | -1.28188 |
| C  | -1.98257 | -3.06382 | -3.59863 |
| C  | -2.17139 | -3.97183 | -2.56867 |
| H  | -2.46913 | -4.14806 | -0.45870 |
| H  | -1.95249 | -3.42705 | -4.62067 |
| C  | 2.06413  | 0.31454  | 1.12372  |
| C  | 2.58661  | -0.91704 | 0.68171  |
| C  | 2.90423  | 1.25841  | 1.73653  |
| C  | 3.95476  | -1.13042 | 0.76894  |
| C  | 4.26769  | 0.99547  | 1.79451  |
| C  | 4.81728  | -0.17812 | 1.29758  |
| H  | 4.35512  | -2.07996 | 0.42651  |
| H  | 4.91826  | 1.73174  | 2.25703  |
| C  | 2.39173  | 2.53090  | 2.33873  |
| H  | 2.22147  | 3.30324  | 1.58289  |
| H  | 1.44378  | 2.38615  | 2.86384  |
| H  | 3.11162  | 2.92828  | 3.05571  |

|    |          |          |          |
|----|----------|----------|----------|
| C  | 1.70695  | -2.02285 | 0.17617  |
| H  | 0.84378  | -2.18290 | 0.83110  |
| H  | 1.32825  | -1.81936 | -0.82786 |
| H  | 2.26481  | -2.95913 | 0.13476  |
| C  | 6.29472  | -0.41602 | 1.33676  |
| H  | 6.76924  | 0.15030  | 2.13979  |
| H  | 6.52501  | -1.47379 | 1.47693  |
| H  | 6.75858  | -0.10359 | 0.39588  |
| C  | -2.41314 | -1.71299 | 0.41777  |
| H  | -2.20968 | -2.54884 | 1.08833  |
| H  | -1.83530 | -0.86176 | 0.77134  |
| H  | -3.46729 | -1.44481 | 0.53110  |
| C  | -1.68319 | -0.86067 | -4.62654 |
| H  | -2.39316 | -0.03435 | -4.65396 |
| H  | -0.68247 | -0.43626 | -4.70959 |
| H  | -1.85945 | -1.48664 | -5.50180 |
| C  | -2.27049 | -5.43908 | -2.84062 |
| H  | -2.75185 | -5.63440 | -3.80043 |
| H  | -1.27256 | -5.88691 | -2.87976 |
| H  | -2.83169 | -5.95389 | -2.05937 |
| Cl | -3.28361 | 1.16263  | -0.79778 |
| S  | -1.01861 | 1.80198  | -3.06373 |

**R = Mes\***

|    |          |          |          |
|----|----------|----------|----------|
| P  | 0.67710  | 0.17138  | 1.07823  |
| C  | 0.40520  | 0.14580  | -0.64979 |
| P  | -1.12049 | -0.08069 | -1.59917 |
| Cl | 2.82145  | -1.08469 | -3.04991 |
| Au | 0.37785  | 2.26707  | -0.09613 |
| Cl | 0.19374  | 4.52900  | -0.03306 |
| C  | 2.51722  | 0.04287  | 1.20675  |
| C  | 3.19299  | -1.12698 | 0.76007  |
| C  | 3.29640  | 1.15863  | 1.60442  |
| C  | 4.51795  | -1.00611 | 0.37209  |
| C  | 4.61876  | 1.21248  | 1.16039  |
| C  | 5.22986  | 0.18419  | 0.46612  |
| H  | 5.02278  | -1.88483 | -0.00749 |
| H  | 5.19295  | 2.09773  | 1.39442  |
| C  | 2.91961  | 2.23319  | 2.64697  |
| C  | 2.67371  | -2.56842 | 0.93151  |
| C  | 6.64004  | 0.28445  | -0.10282 |
| C  | 3.86710  | 1.98902  | 3.84046  |
| H  | 3.72943  | 0.98544  | 4.25137  |
| H  | 4.91572  | 2.09657  | 3.56140  |
| H  | 3.65125  | 2.71421  | 4.62981  |
| C  | 3.14733  | 3.65574  | 2.12932  |
| H  | 2.50481  | 3.88753  | 1.27967  |
| H  | 2.91775  | 4.37320  | 2.92189  |
| H  | 4.18345  | 3.82194  | 1.82991  |
| C  | 1.50994  | 2.13948  | 3.22347  |
| H  | 1.43733  | 2.81628  | 4.07908  |
| H  | 0.73482  | 2.45028  | 2.52137  |
| H  | 1.27958  | 1.13372  | 3.58454  |
| C  | 2.98382  | -3.45863 | -0.27433 |
| H  | 2.56450  | -3.04861 | -1.19152 |
| H  | 4.05623  | -3.58711 | -0.42763 |
| H  | 2.56324  | -4.45448 | -0.10895 |
| C  | 3.42640  | -3.12544 | 2.15530  |
| H  | 4.50587  | -3.11708 | 1.99645  |
| H  | 3.21361  | -2.53464 | 3.04994  |
| H  | 3.11574  | -4.15758 | 2.34352  |
| C  | 1.18914  | -2.69915 | 1.24766  |
| H  | 0.90058  | -2.11916 | 2.13067  |
| H  | 0.55684  | -2.41256 | 0.40841  |
| H  | 0.96513  | -3.74495 | 1.47696  |
| C  | 7.25911  | 1.66058  | 0.12593  |

|    |          |          |          |
|----|----------|----------|----------|
| H  | 6.65774  | 2.45456  | -0.32353 |
| H  | 7.38420  | 1.88178  | 1.18925  |
| H  | 8.24954  | 1.69498  | -0.33415 |
| C  | 6.57678  | 0.02717  | -1.61320 |
| H  | 7.58075  | 0.07506  | -2.04449 |
| H  | 6.15552  | -0.95390 | -1.84006 |
| H  | 5.95381  | 0.77302  | -2.11202 |
| C  | 7.54425  | -0.76500 | 0.55419  |
| H  | 7.59861  | -0.61473 | 1.63543  |
| H  | 7.18851  | -1.78104 | 0.37223  |
| H  | 8.55734  | -0.69208 | 0.14911  |
| C  | -2.35368 | -1.46487 | -1.67172 |
| C  | -2.32877 | -2.30514 | -2.82637 |
| C  | -3.58230 | -1.34479 | -0.96571 |
| C  | -3.53899 | -2.57090 | -3.44792 |
| C  | -1.13193 | -3.14531 | -3.31012 |
| C  | -4.75253 | -1.67995 | -1.63881 |
| C  | -3.74757 | -1.07490 | 0.54149  |
| C  | -4.76739 | -2.18280 | -2.92958 |
| H  | -3.51559 | -3.14376 | -4.36665 |
| C  | -0.70394 | -2.85502 | -4.74997 |
| C  | -1.59831 | -4.61649 | -3.24870 |
| C  | 0.05393  | -3.06351 | -2.36449 |
| H  | -5.68981 | -1.53778 | -1.11964 |
| C  | -2.45267 | -0.75577 | 1.26864  |
| C  | -4.24794 | -2.41253 | 1.12670  |
| C  | -4.78110 | 0.00785  | 0.86235  |
| C  | -6.04762 | -2.41052 | -3.72143 |
| H  | 0.01982  | -3.60880 | -5.07069 |
| H  | -1.55418 | -2.89752 | -5.43483 |
| H  | -0.23639 | -1.87756 | -4.84423 |
| H  | -2.36626 | -4.84658 | -3.98793 |
| H  | -0.74105 | -5.26466 | -3.44917 |
| H  | -1.99091 | -4.86717 | -2.26031 |
| H  | 0.49887  | -2.07281 | -2.30802 |
| H  | -0.23350 | -3.39106 | -1.36298 |
| H  | 0.84616  | -3.72626 | -2.71867 |
| H  | -1.67561 | -1.48900 | 1.04202  |
| H  | -2.07899 | 0.24282  | 1.05017  |
| H  | -2.62210 | -0.79021 | 2.34757  |
| H  | -4.35959 | -2.31284 | 2.20986  |
| H  | -5.21249 | -2.70728 | 0.71164  |
| H  | -3.53505 | -3.21700 | 0.92984  |
| H  | -5.76519 | -0.22219 | 0.45099  |
| H  | -4.89287 | 0.08764  | 1.94681  |
| H  | -4.47370 | 0.98227  | 0.48387  |
| C  | -7.28240 | -1.90274 | -2.98183 |
| C  | -6.22883 | -3.90835 | -3.99572 |
| C  | -5.93789 | -1.65942 | -5.05400 |
| H  | -7.45571 | -2.44923 | -2.05120 |
| H  | -7.20497 | -0.83805 | -2.74815 |
| H  | -8.16544 | -2.04131 | -3.60985 |
| H  | -5.40166 | -4.31894 | -4.57797 |
| H  | -6.29712 | -4.47284 | -3.06255 |
| H  | -7.14888 | -4.07537 | -4.56230 |
| H  | -5.81949 | -0.58580 | -4.88997 |
| H  | -5.08527 | -2.00359 | -5.64270 |
| H  | -6.84210 | -1.81645 | -5.64823 |
| Ge | 1.72078  | 0.72972  | -2.25028 |
| Cl | -2.43847 | 1.46280  | -1.22391 |
| S  | -0.41809 | 0.33249  | -3.42710 |

**[R-P=C(Ge(II)Cl)-P(S)MeR](AuCl)**

**Coordination through Ge(II) atom**

**R= H**

|    |          |          |          |
|----|----------|----------|----------|
| P  | 0.40301  | 0.90251  | 0.24315  |
| C  | 0.03379  | 0.50646  | -1.32529 |
| P  | -1.55421 | 0.08076  | -1.96107 |
| Ge | 0.96087  | 0.74887  | -3.09381 |
| Cl | 1.43375  | -1.33601 | -3.55485 |
| C  | -2.97853 | 0.67566  | -1.04442 |
| H  | -2.93766 | 1.76399  | -0.99189 |
| H  | -3.89208 | 0.36644  | -1.55564 |
| H  | -2.96277 | 0.25251  | -0.03721 |
| Au | 2.38080  | 2.51766  | -3.63886 |
| Cl | 3.76394  | 4.26812  | -4.07860 |
| H  | 1.76108  | 1.28521  | 0.02005  |
| H  | -1.69073 | -1.32220 | -1.95541 |
| S  | -1.36547 | 0.81169  | -3.82225 |

**R = Me**

|    |          |          |          |
|----|----------|----------|----------|
| P  | 0.43164  | 0.57740  | 0.28206  |
| C  | 0.03861  | 0.35603  | -1.31429 |
| P  | -1.57794 | 0.00019  | -1.92069 |
| Ge | 0.92512  | 0.67508  | -3.08507 |
| Cl | 1.53113  | -1.36991 | -3.61434 |
| C  | -2.91467 | 0.81354  | -1.03229 |
| H  | -2.74653 | 1.89024  | -1.04828 |
| H  | -3.86608 | 0.58550  | -1.51675 |
| H  | -2.93634 | 0.45929  | 0.00081  |
| C  | -1.91656 | -1.76668 | -1.87452 |
| H  | -1.98075 | -2.10244 | -0.83709 |
| H  | -2.85486 | -1.97312 | -2.39296 |
| H  | -1.09848 | -2.28118 | -2.38055 |
| C  | 2.21645  | 0.97372  | 0.26801  |
| H  | 2.77684  | 0.03989  | 0.37896  |
| H  | 2.53375  | 1.47036  | -0.65148 |
| H  | 2.44858  | 1.60462  | 1.12775  |
| Au | 2.30656  | 2.49380  | -3.58540 |
| Cl | 3.66306  | 4.28652  | -3.95176 |
| S  | -1.36285 | 0.68353  | -3.81347 |

**R = t-Bu**

|    |          |          |          |
|----|----------|----------|----------|
| P  | 0.42465  | 0.44757  | 0.09617  |
| C  | 0.23946  | 0.15700  | -1.52973 |
| P  | -1.36582 | -0.18372 | -2.21209 |
| Ge | 1.23646  | 0.40300  | -3.26111 |
| Cl | 2.18235  | -1.54261 | -3.61484 |
| C  | -2.59269 | 1.02108  | -1.66349 |
| H  | -2.22634 | 2.01104  | -1.93616 |
| H  | -3.54777 | 0.84320  | -2.15933 |
| H  | -2.71613 | 0.96525  | -0.58084 |
| Au | 2.34671  | 2.38296  | -3.84069 |
| Cl | 3.40080  | 4.35415  | -4.29834 |
| C  | 2.19270  | 0.90401  | 0.46978  |
| C  | 3.23388  | 0.27254  | -0.44071 |
| C  | 2.25137  | 2.43400  | 0.38995  |
| C  | 2.41583  | 0.45423  | 1.91681  |
| H  | 3.12311  | -0.81120 | -0.51176 |
| H  | 3.20522  | 0.69136  | -1.44887 |
| H  | 4.23273  | 0.48409  | -0.04496 |
| H  | 1.48987  | 2.90827  | 1.01653  |
| H  | 3.22847  | 2.77291  | 0.74935  |
| H  | 2.12987  | 2.79045  | -0.63531 |
| H  | 3.39946  | 0.79449  | 2.25358  |
| H  | 1.66636  | 0.87195  | 2.59457  |

|   |          |          |          |
|---|----------|----------|----------|
| H | 2.38911  | -0.63468 | 2.01141  |
| C | -2.02141 | -1.87485 | -1.84584 |
| C | -3.24636 | -2.10866 | -2.73003 |
| C | -0.93738 | -2.89715 | -2.17591 |
| C | -2.40063 | -1.96028 | -0.36838 |
| H | -4.06459 | -1.42243 | -2.50070 |
| H | -3.00090 | -2.02064 | -3.79045 |
| H | -3.61271 | -3.12405 | -2.55548 |
| H | -0.05131 | -2.76731 | -1.55272 |
| H | -1.33748 | -3.89886 | -1.99622 |
| H | -0.62568 | -2.83618 | -3.21964 |
| H | -2.71131 | -2.98539 | -0.14811 |
| H | -1.55943 | -1.72262 | 0.28725  |
| H | -3.23483 | -1.30311 | -0.11494 |
| S | -0.94156 | 0.06228  | -4.18150 |

**R = Ph**

|    |          |          |          |
|----|----------|----------|----------|
| P  | 0.47888  | 0.57550  | 0.14639  |
| C  | 0.09452  | 0.26922  | -1.44347 |
| P  | -1.55477 | -0.04073 | -1.98829 |
| Ge | 0.93634  | 0.55176  | -3.23993 |
| Cl | 1.55427  | -1.48375 | -3.80180 |
| C  | -2.80184 | 0.92108  | -1.11334 |
| H  | -2.55151 | 1.97819  | -1.20441 |
| H  | -3.77855 | 0.72908  | -1.56060 |
| H  | -2.82258 | 0.63818  | -0.05924 |
| Au | 2.26679  | 2.37473  | -3.85518 |
| Cl | 3.58357  | 4.16027  | -4.38580 |
| C  | 2.25154  | 0.86528  | 0.19107  |
| C  | 2.70693  | 1.71527  | 1.20405  |
| C  | 3.17446  | 0.29378  | -0.69011 |
| C  | 4.05145  | 2.03023  | 1.30083  |
| H  | 1.99834  | 2.14307  | 1.90656  |
| C  | 4.51855  | 0.60157  | -0.58082 |
| H  | 2.84837  | -0.41758 | -1.44092 |
| C  | 4.95553  | 1.47667  | 0.40548  |
| H  | 4.39508  | 2.70676  | 2.07442  |
| H  | 5.22819  | 0.16135  | -1.27104 |
| H  | 6.00858  | 1.72226  | 0.47957  |
| C  | -2.02620 | -1.77215 | -1.80560 |
| C  | -2.16557 | -2.59171 | -2.91937 |
| C  | -2.22852 | -2.28980 | -0.52582 |
| C  | -2.52151 | -3.92208 | -2.75402 |
| H  | -1.98611 | -2.18799 | -3.90886 |
| C  | -2.58157 | -3.61834 | -0.36851 |
| H  | -2.09663 | -1.66562 | 0.35207  |
| C  | -2.73089 | -4.43375 | -1.48328 |
| H  | -2.62852 | -4.55999 | -3.62328 |
| H  | -2.73644 | -4.02030 | 0.62582  |
| H  | -3.00561 | -5.47465 | -1.35714 |
| S  | -1.37354 | 0.52275  | -3.92059 |

**R = Mes**

|    |          |          |          |
|----|----------|----------|----------|
| P  | 0.53451  | 0.56808  | 0.50897  |
| C  | 0.31042  | -0.02134 | -1.03365 |
| P  | -1.28154 | -0.28507 | -1.77927 |
| Ge | 1.41450  | 0.20152  | -2.68185 |
| Cl | 1.82325  | -1.90029 | -3.21317 |
| C  | -2.53233 | 0.68780  | -0.90893 |
| H  | -2.25615 | 1.74139  | -0.95392 |
| H  | -3.52188 | 0.53660  | -1.33707 |
| H  | -2.54449 | 0.35811  | 0.13314  |
| Au | 3.06568  | 1.81379  | -3.07717 |
| Cl | 4.69505  | 3.40088  | -3.34177 |
| C  | 2.28511  | 1.04711  | 0.54024  |
| C  | 2.58115  | 2.42049  | 0.54295  |

|   |          |          |          |
|---|----------|----------|----------|
| C | 3.31414  | 0.09696  | 0.60027  |
| C | 3.90821  | 2.81796  | 0.54732  |
| C | 4.62867  | 0.54569  | 0.61168  |
| C | 4.94852  | 1.89636  | 0.56035  |
| H | 4.13801  | 3.87796  | 0.50598  |
| H | 5.42927  | -0.18696 | 0.65134  |
| C | -1.96166 | -1.96517 | -1.90067 |
| C | -3.02543 | -2.16723 | -2.80623 |
| C | -1.50236 | -3.03727 | -1.10919 |
| C | -3.60217 | -3.42821 | -2.89049 |
| C | -2.11661 | -4.27527 | -1.24674 |
| C | -3.16291 | -4.49906 | -2.12888 |
| H | -4.42288 | -3.57291 | -3.58624 |
| H | -1.75829 | -5.09565 | -0.63308 |
| C | -3.56664 | -1.12174 | -3.73935 |
| H | -3.61875 | -0.11986 | -3.31385 |
| H | -2.94234 | -1.04633 | -4.63327 |
| H | -4.57389 | -1.39601 | -4.05509 |
| C | -0.38175 | -2.93795 | -0.11978 |
| H | 0.54844  | -2.63424 | -0.60154 |
| H | -0.59111 | -2.21646 | 0.67280  |
| H | -0.21866 | -3.90854 | 0.34893  |
| C | -3.77719 | -5.85588 | -2.27062 |
| H | -3.21376 | -6.45678 | -2.99117 |
| H | -3.77276 | -6.39622 | -1.32241 |
| H | -4.80574 | -5.79318 | -2.62903 |
| C | 3.03895  | -1.37729 | 0.64600  |
| H | 2.17882  | -1.61370 | 1.27904  |
| H | 2.83112  | -1.77778 | -0.35100 |
| H | 3.90176  | -1.91558 | 1.04079  |
| C | 1.49631  | 3.45265  | 0.46531  |
| H | 1.12183  | 3.54697  | -0.55904 |
| H | 0.64355  | 3.20227  | 1.10605  |
| H | 1.86786  | 4.43174  | 0.76970  |
| C | 6.36901  | 2.35578  | 0.47725  |
| H | 6.59251  | 2.66995  | -0.54710 |
| H | 6.55003  | 3.21379  | 1.12840  |
| H | 7.06537  | 1.56111  | 0.74855  |
| S | -0.77095 | 0.49359  | -3.59592 |

**R = Mes\***

|    |          |          |          |
|----|----------|----------|----------|
| P  | -0.22934 | 1.82487  | 1.18770  |
| C  | 0.22279  | 0.47305  | 0.31926  |
| P  | 1.82346  | -0.30819 | 0.17758  |
| Cl | -1.26759 | 0.57189  | -2.69150 |
| C  | 3.52768  | 0.37237  | 0.20894  |
| C  | 4.17345  | 0.61620  | -1.03835 |
| C  | 4.34236  | 0.13377  | 1.34929  |
| C  | 5.49041  | 0.19942  | -1.16921 |
| C  | 5.65926  | -0.26137 | 1.13545  |
| C  | 6.22961  | -0.34159 | -0.12533 |
| H  | 5.96556  | 0.32386  | -2.13428 |
| H  | 6.26425  | -0.49880 | 1.99957  |
| C  | -2.05010 | 1.83947  | 0.97126  |
| C  | -2.64147 | 2.72825  | 0.04448  |
| C  | -2.85454 | 0.88411  | 1.64518  |
| C  | -3.92803 | 2.43693  | -0.40013 |
| C  | -4.12338 | 0.64507  | 1.13453  |
| C  | -4.65641 | 1.35244  | 0.06440  |
| H  | -4.37340 | 3.07431  | -1.14706 |
| H  | -4.72834 | -0.12327 | 1.59477  |
| C  | -1.98354 | 4.05291  | -0.38956 |
| C  | -2.47353 | 0.21364  | 2.98598  |
| C  | -6.01313 | 0.95886  | -0.50884 |
| C  | 3.98274  | 0.47640  | 2.81113  |
| C  | 3.63181  | 1.49033  | -2.18730 |

|   |          |          |          |    |          |          |          |
|---|----------|----------|----------|----|----------|----------|----------|
| C | 7.62895  | -0.88942 | -0.37356 | H  | 8.15799  | 0.62036  | -1.86808 |
| C | -3.73962 | -0.09037 | 3.80120  | H  | 8.60669  | 1.05184  | -0.21447 |
| H | -3.44521 | -0.40452 | 4.80554  | H  | 9.53717  | -0.16603 | -1.09957 |
| H | -4.38394 | 0.78695  | 3.89390  | C  | 7.53665  | -2.02264 | -1.40274 |
| H | -4.32278 | -0.90721 | 3.37351  | H  | 6.91075  | -2.83838 | -1.03311 |
| C | -1.64065 | 1.16697  | 3.84687  | H  | 7.11226  | -1.67740 | -2.34749 |
| H | -0.64520 | 1.36596  | 3.43064  | H  | 8.53244  | -2.42401 | -1.60874 |
| H | -2.14112 | 2.12897  | 3.98017  | Ge | -0.73984 | -0.72115 | -0.99629 |
| H | -1.47485 | 0.72322  | 4.83229  | Au | -2.23623 | -2.45952 | -0.50204 |
| C | -1.72182 | -1.10894 | 2.82356  | Cl | -3.73144 | -4.09929 | 0.07373  |
| H | -2.29996 | -1.82494 | 2.23585  | S  | 1.49085  | -1.28144 | -1.59073 |
| H | -0.76059 | -0.96754 | 2.33191  | C  | 1.83236  | -1.69945 | 1.34572  |
| H | -1.53977 | -1.54974 | 3.80861  | H  | 1.84333  | -1.40815 | 2.39070  |
| C | -7.08210 | 1.02017  | 0.58855  | H  | 0.92493  | -2.27010 | 1.13917  |
| H | -8.05504 | 0.73738  | 0.17742  | H  | 2.69795  | -2.32264 | 1.11704  |
| H | -6.86146 | 0.33752  | 1.41122  |    |          |          |          |
| H | -7.16651 | 2.02972  | 0.99950  |    |          |          |          |
| C | -6.44675 | 1.87585  | -1.64952 |    |          |          |          |
| H | -7.40806 | 1.53576  | -2.04180 |    |          |          |          |
| H | -6.57407 | 2.91042  | -1.31895 |    |          |          |          |
| H | -5.73033 | 1.86131  | -2.47459 |    |          |          |          |
| C | -5.91853 | -0.47341 | -1.04939 |    |          |          |          |
| H | -5.17159 | -0.54228 | -1.84371 |    |          |          |          |
| H | -5.63896 | -1.19042 | -0.27526 |    |          |          |          |
| H | -6.88349 | -0.78298 | -1.46067 |    |          |          |          |
| C | -2.91505 | 4.89270  | -1.26662 |    |          |          |          |
| H | -3.85927 | 5.11931  | -0.76665 |    |          |          |          |
| H | -2.42393 | 5.84277  | -1.48970 |    |          |          |          |
| H | -3.13279 | 4.40483  | -2.21953 |    |          |          |          |
| C | -1.69098 | 4.87756  | 0.87277  |    |          |          |          |
| H | -2.60588 | 5.05216  | 1.44395  |    |          |          |          |
| H | -0.97330 | 4.38194  | 1.53081  |    |          |          |          |
| H | -1.26965 | 5.84830  | 0.59600  |    |          |          |          |
| C | -0.68989 | 3.86676  | -1.18160 |    |          |          |          |
| H | 0.10483  | 3.41580  | -0.58123 |    |          |          |          |
| H | -0.84102 | 3.23477  | -2.05677 |    |          |          |          |
| H | -0.31745 | 4.84213  | -1.50895 |    |          |          |          |
| C | 2.61009  | 1.11454  | 2.99144  |    |          |          |          |
| H | 2.48303  | 1.97334  | 2.32969  |    |          |          |          |
| H | 1.76994  | 0.44116  | 2.83360  |    |          |          |          |
| H | 2.51783  | 1.47907  | 4.01744  |    |          |          |          |
| C | 4.98500  | 1.57380  | 3.23107  |    |          |          |          |
| H | 4.74980  | 1.90714  | 4.24540  |    |          |          |          |
| H | 6.01577  | 1.21938  | 3.22518  |    |          |          |          |
| H | 4.91968  | 2.43729  | 2.56526  |    |          |          |          |
| C | 4.15713  | -0.70398 | 3.77156  |    |          |          |          |
| H | 5.17431  | -1.09876 | 3.74225  |    |          |          |          |
| H | 3.96390  | -0.37410 | 4.79557  |    |          |          |          |
| H | 3.47986  | -1.53001 | 3.55489  |    |          |          |          |
| C | 2.26173  | 2.09897  | -1.92048 |    |          |          |          |
| H | 2.06073  | 2.86348  | -2.67478 |    |          |          |          |
| H | 1.44904  | 1.37932  | -1.98606 |    |          |          |          |
| H | 2.23197  | 2.58747  | -0.94350 |    |          |          |          |
| C | 3.62693  | 0.77468  | -3.53983 |    |          |          |          |
| H | 2.91983  | -0.05363 | -3.54979 |    |          |          |          |
| H | 3.33391  | 1.48018  | -4.32166 |    |          |          |          |
| H | 4.61439  | 0.38750  | -3.79997 |    |          |          |          |
| C | 4.60511  | 2.68582  | -2.27524 |    |          |          |          |
| H | 4.65282  | 3.22438  | -1.32546 |    |          |          |          |
| H | 5.61795  | 2.38365  | -2.54368 |    |          |          |          |
| H | 4.24795  | 3.37915  | -3.04110 |    |          |          |          |
| C | 8.26663  | -1.44386 | 0.89746  |    |          |          |          |
| H | 8.42452  | -0.66643 | 1.64945  |    |          |          |          |
| H | 7.66091  | -2.23750 | 1.34211  |    |          |          |          |
| H | 9.24432  | -1.86852 | 0.65876  |    |          |          |          |
| C | 8.53088  | 0.22275  | -0.92224 |    |          |          |          |

  

| <b>Coordination through S atom</b> |          |          |          |  |  |  |  |
|------------------------------------|----------|----------|----------|--|--|--|--|
| <b>R= H</b>                        |          |          |          |  |  |  |  |
| P                                  | 0.53048  | 0.29204  | 0.66447  |  |  |  |  |
| C                                  | 0.32219  | 0.31560  | -0.98108 |  |  |  |  |
| P                                  | -1.17988 | 0.63163  | -1.82089 |  |  |  |  |
| Ge                                 | 1.64395  | 0.35904  | -2.58722 |  |  |  |  |
| Cl                                 | 0.94469  | -1.58491 | -3.42000 |  |  |  |  |
| C                                  | -2.57101 | 1.32231  | -0.92136 |  |  |  |  |
| H                                  | -2.28125 | 2.27535  | -0.47830 |  |  |  |  |
| H                                  | -3.39665 | 1.47588  | -1.61957 |  |  |  |  |
| H                                  | -2.87642 | 0.62431  | -0.13816 |  |  |  |  |
| Au                                 | -1.90789 | 1.42868  | -5.01356 |  |  |  |  |
| Cl                                 | -3.40531 | 1.09029  | -6.66138 |  |  |  |  |
| H                                  | -1.63290 | -0.58277 | -2.35987 |  |  |  |  |
| H                                  | 1.94817  | 0.08967  | 0.67930  |  |  |  |  |
| S                                  | -0.44939 | 1.82150  | -3.30783 |  |  |  |  |

  

| <b>R = Me</b> |          |          |          |  |  |  |  |
|---------------|----------|----------|----------|--|--|--|--|
| P             | 0.51695  | 0.21422  | 0.63591  |  |  |  |  |
| C             | 0.30736  | 0.35554  | -1.00325 |  |  |  |  |
| P             | -1.26055 | 0.56368  | -1.75489 |  |  |  |  |
| Ge            | 1.59378  | 0.66325  | -2.60671 |  |  |  |  |
| Cl            | 1.41868  | -1.39640 | -3.45746 |  |  |  |  |
| C             | -2.51007 | 1.42371  | -0.78619 |  |  |  |  |
| H             | -2.12591 | 2.39798  | -0.48476 |  |  |  |  |
| H             | -3.40419 | 1.55630  | -1.39913 |  |  |  |  |
| H             | -2.75665 | 0.83511  | 0.10050  |  |  |  |  |
| C             | -1.96328 | -1.01686 | -2.23499 |  |  |  |  |
| H             | -2.19499 | -1.58241 | -1.32891 |  |  |  |  |
| H             | -2.86775 | -0.84950 | -2.82272 |  |  |  |  |
| H             | -1.22827 | -1.55691 | -2.83258 |  |  |  |  |
| C             | 2.32609  | 0.00073  | 0.85278  |  |  |  |  |
| H             | 2.53901  | -1.07053 | 0.92308  |  |  |  |  |
| H             | 2.90886  | 0.42044  | 0.03076  |  |  |  |  |
| H             | 2.63319  | 0.45969  | 1.79458  |  |  |  |  |
| Au            | -1.99513 | 1.06592  | -5.11027 |  |  |  |  |
| Cl            | -3.37293 | 0.49923  | -6.80224 |  |  |  |  |
| S             | -0.66502 | 1.68633  | -3.36847 |  |  |  |  |

  

| <b>R = t-Bu</b> |          |          |          |  |  |  |  |
|-----------------|----------|----------|----------|--|--|--|--|
| P               | 0.65973  | -0.24848 | 0.47361  |  |  |  |  |
| C               | 0.19729  | 0.47478  | -0.95169 |  |  |  |  |
| P               | -1.50630 | 0.38108  | -1.42214 |  |  |  |  |
| Ge              | 0.98242  | 1.84618  | -2.32243 |  |  |  |  |
| Cl              | 1.66483  | 0.37100  | -3.85817 |  |  |  |  |
| Au              | -2.46963 | 1.40005  | -4.79533 |  |  |  |  |
| Cl              | -3.41336 | 0.96734  | -6.79875 |  |  |  |  |
| C               | -2.05101 | -1.27626 | -2.06302 |  |  |  |  |

|   |          |          |          |
|---|----------|----------|----------|
| C | -3.51029 | -1.18634 | -2.50845 |
| C | -1.15916 | -1.70050 | -3.22440 |
| C | -1.92475 | -2.28411 | -0.91887 |
| H | -4.18660 | -0.96962 | -1.67909 |
| H | -3.65850 | -0.44228 | -3.29473 |
| H | -3.79840 | -2.15624 | -2.92247 |
| H | -0.10973 | -1.76309 | -2.93409 |
| H | -1.48417 | -2.68870 | -3.56123 |
| H | -1.23633 | -1.01703 | -4.07158 |
| H | -2.22388 | -3.26269 | -1.30428 |
| H | -0.90068 | -2.37171 | -0.55224 |
| H | -2.57863 | -2.05091 | -0.07630 |
| C | 2.50038  | -0.06405 | 0.72940  |
| C | 3.05098  | -1.49113 | 0.62504  |
| C | 3.22097  | 0.85013  | -0.24316 |
| C | 2.66521  | 0.44239  | 2.16519  |
| H | 2.53321  | -2.18010 | 1.29849  |
| H | 2.96950  | -1.87905 | -0.39306 |
| H | 4.11029  | -1.49098 | 0.90239  |
| H | 2.84923  | 1.87649  | -0.18954 |
| H | 4.28868  | 0.88124  | 0.00065  |
| H | 3.14031  | 0.49122  | -1.27284 |
| H | 3.72600  | 0.43704  | 2.43487  |
| H | 2.29620  | 1.46506  | 2.27755  |
| H | 2.13589  | -0.19013 | 2.88309  |
| S | -1.55091 | 1.93718  | -2.78057 |
| C | -2.61332 | 0.83130  | -0.06645 |
| H | -2.52870 | 0.10869  | 0.74659  |
| H | -2.31125 | 1.81462  | 0.29419  |
| H | -3.64251 | 0.88146  | -0.42326 |

**R = Ph**

|    |          |          |          |
|----|----------|----------|----------|
| P  | 0.42790  | 0.78655  | 0.36118  |
| C  | 0.40889  | 0.28157  | -1.22508 |
| P  | -1.03938 | 0.34346  | -2.20474 |
| Ge | 1.91607  | 0.08074  | -2.63930 |
| Cl | 1.79049  | -2.13455 | -2.93489 |
| C  | -2.25901 | 1.58608  | -1.73922 |
| H  | -1.78083 | 2.56563  | -1.72736 |
| H  | -3.06959 | 1.58608  | -2.47016 |
| H  | -2.66042 | 1.35001  | -0.75156 |
| Au | -1.30446 | -0.09414 | -5.70267 |
| Cl | -2.49942 | -0.96692 | -7.40909 |
| C  | -1.89854 | -1.23433 | -2.22290 |
| C  | -1.42728 | -2.29717 | -1.45847 |
| C  | -3.05060 | -1.38322 | -2.99587 |
| C  | -2.11233 | -3.50229 | -1.46318 |
| H  | -0.52249 | -2.18648 | -0.87533 |
| C  | -3.72459 | -2.59089 | -2.99887 |
| H  | -3.41187 | -0.57315 | -3.61960 |
| C  | -3.25654 | -3.64927 | -2.23125 |
| H  | -1.74046 | -4.33146 | -0.87318 |
| H  | -4.60834 | -2.70846 | -3.61406 |
| H  | -3.78376 | -4.59628 | -2.24082 |
| C  | 2.13300  | 0.53259  | 0.89797  |
| C  | 2.61493  | 1.38896  | 1.89211  |
| C  | 2.97012  | -0.47043 | 0.39858  |
| C  | 3.91992  | 1.27788  | 2.34200  |
| H  | 1.96340  | 2.15342  | 2.30428  |
| C  | 4.27142  | -0.58513 | 0.85879  |
| H  | 2.58997  | -1.19296 | -0.31697 |
| C  | 4.74908  | 0.29307  | 1.82254  |
| H  | 4.29002  | 1.95554  | 3.10255  |
| H  | 4.91224  | -1.36755 | 0.46924  |
| H  | 5.76813  | 0.20023  | 2.18025  |
| S  | -0.15715 | 0.87091  | -3.99063 |

**R = Mes**

|    |          |          |          |
|----|----------|----------|----------|
| P  | 0.21167  | 0.53470  | 0.49646  |
| C  | 0.11491  | 0.06811  | -1.09549 |
| P  | -1.28700 | 0.02368  | -2.15867 |
| Ge | 1.72697  | 0.07540  | -2.38366 |
| Cl | 1.69030  | -2.14007 | -2.85079 |
| C  | -2.64857 | 1.14446  | -1.76367 |
| H  | -2.23510 | 2.13469  | -1.56737 |
| H  | -3.30204 | 1.19315  | -2.63726 |
| H  | -3.21553 | 0.79509  | -0.90332 |
| Au | -0.00183 | 2.92807  | -3.20475 |
| Cl | 0.40097  | 5.06879  | -2.59947 |
| C  | -1.99457 | -1.64968 | -2.32970 |
| C  | -2.58113 | -2.19764 | -1.16754 |
| C  | -1.99072 | -2.40786 | -3.52454 |
| C  | -3.11286 | -3.48116 | -1.21358 |
| C  | -2.55092 | -3.67828 | -3.50297 |
| C  | -3.10629 | -4.24504 | -2.36572 |
| H  | -3.54967 | -3.88781 | -0.30653 |
| H  | -2.54286 | -4.25154 | -4.42435 |
| C  | 2.01248  | 0.52242  | 0.79659  |
| C  | 2.69172  | 1.74950  | 0.86277  |
| C  | 2.68504  | -0.68300 | 1.05524  |
| C  | 4.05071  | 1.74394  | 1.14644  |
| C  | 4.04469  | -0.63497 | 1.33655  |
| C  | 4.74715  | 0.56356  | 1.37596  |
| H  | 4.57881  | 2.69188  | 1.19141  |
| H  | 4.56846  | -1.56421 | 1.54073  |
| C  | 1.98142  | 3.04429  | 0.60978  |
| H  | 1.78639  | 3.20382  | -0.45529 |
| H  | 1.01087  | 3.08003  | 1.11658  |
| H  | 2.57151  | 3.89120  | 0.96163  |
| C  | 1.97326  | -2.00403 | 1.05210  |
| H  | 1.04218  | -1.95988 | 1.62599  |
| H  | 1.71222  | -2.31996 | 0.03820  |
| H  | 2.60145  | -2.77900 | 1.49316  |
| C  | 6.22013  | 0.58205  | 1.64602  |
| H  | 6.78377  | 0.54085  | 0.70866  |
| H  | 6.51862  | 1.49450  | 2.16532  |
| H  | 6.52618  | -0.27430 | 2.24938  |
| C  | -2.72909 | -1.48975 | 0.14961  |
| H  | -1.98503 | -0.71946 | 0.34013  |
| H  | -3.71839 | -1.02759 | 0.22731  |
| H  | -2.65245 | -2.21061 | 0.96495  |
| C  | -1.42928 | -1.96519 | -4.84316 |
| H  | -1.87608 | -1.03621 | -5.19821 |
| H  | -0.34965 | -1.81794 | -4.78895 |
| H  | -1.62187 | -2.73413 | -5.59143 |
| C  | -3.65681 | -5.63573 | -2.38689 |
| H  | -4.30762 | -5.82151 | -1.53155 |
| H  | -4.22456 | -5.82323 | -3.30054 |
| H  | -2.84553 | -6.36920 | -2.35357 |
| S  | -0.36422 | 0.75778  | -3.86615 |

**R = Mes\***

|   |          |          |          |
|---|----------|----------|----------|
| P | -1.99909 | 1.86324  | 0.37895  |
| C | -1.05993 | 0.49325  | 0.26419  |
| P | 0.70144  | 0.36263  | 0.36902  |
| C | -3.70665 | 1.16953  | 0.36470  |
| C | -4.49038 | 1.28214  | -0.81390 |
| C | -4.19690 | 0.41759  | 1.45652  |
| C | -5.56789 | 0.42182  | -0.95781 |
| C | -5.27575 | -0.43699 | 1.22536  |
| C | -5.93341 | -0.50654 | 0.01064  |
| H | -6.14537 | 0.46122  | -1.86964 |

|   |          |          |          |
|---|----------|----------|----------|
| H | -5.62050 | -1.05932 | 2.03730  |
| C | -3.71745 | 0.56214  | 2.91951  |
| C | -4.25660 | 2.36445  | -1.88551 |
| C | -7.05715 | -1.49833 | -0.26945 |
| C | -2.94996 | 2.16733  | -2.65443 |
| H | -2.07121 | 2.28949  | -2.01794 |
| H | -2.89494 | 1.17307  | -3.09962 |
| H | -2.87419 | 2.91665  | -3.44815 |
| C | -4.25783 | 3.74222  | -1.20779 |
| H | -5.20006 | 3.91503  | -0.68196 |
| H | -3.44428 | 3.85330  | -0.48788 |
| H | -4.13834 | 4.52650  | -1.96058 |
| C | -5.37771 | 2.38693  | -2.92767 |
| H | -5.40177 | 1.47425  | -3.52761 |
| H | -6.36053 | 2.53432  | -2.47384 |
| H | -5.20137 | 3.22026  | -3.61161 |
| C | -2.66342 | -0.47945 | 3.30162  |
| H | -1.73501 | -0.32494 | 2.75335  |
| H | -2.44162 | -0.41121 | 4.37102  |
| H | -3.01495 | -1.49220 | 3.09286  |
| C | -3.17717 | 1.96460  | 3.20343  |
| H | -2.24619 | 2.18667  | 2.67107  |
| H | -3.90477 | 2.73426  | 2.93568  |
| H | -2.95087 | 2.06213  | 4.26872  |
| C | -4.90717 | 0.38022  | 3.87732  |
| H | -5.75010 | 1.01632  | 3.59817  |
| H | -5.25660 | -0.65211 | 3.92440  |
| H | -4.59361 | 0.65385  | 4.88769  |
| C | -7.30135 | -2.44338 | 0.90391  |
| H | -7.62881 | -1.90833 | 1.79923  |
| H | -8.08875 | -3.15382 | 0.64120  |
| H | -6.40645 | -3.01923 | 1.15287  |
| C | -6.67934 | -2.34050 | -1.49433 |
| H | -6.53739 | -1.72137 | -2.38216 |
| H | -5.74996 | -2.88810 | -1.32244 |
| H | -7.47060 | -3.06351 | -1.71154 |
| C | -8.35827 | -0.73968 | -0.55587 |
| H | -8.26118 | -0.07889 | -1.41960 |
| H | -9.16640 | -1.44574 | -0.76647 |
| H | -8.65361 | -0.13061 | 0.30224  |
| C | 2.08557  | 1.48157  | -0.05491 |
| C | 2.71244  | 1.30580  | -1.32275 |
| C | 2.85305  | 2.04127  | 1.00227  |
| C | 4.09840  | 1.28881  | -1.35282 |
| C | 4.23793  | 1.98998  | 0.89359  |
| C | 4.88965  | 1.50837  | -0.23218 |
| H | 4.58255  | 1.09538  | -2.30176 |
| H | 4.82758  | 2.35293  | 1.72440  |
| C | 2.00755  | 1.34281  | -2.69250 |
| C | 2.36171  | 0.15541  | -3.59063 |
| C | 2.52700  | 2.63107  | -3.36664 |
| H | 1.99273  | -0.78287 | -3.17856 |
| H | 1.90429  | 0.29723  | -4.57332 |
| H | 3.43877  | 0.06132  | -3.74079 |
| H | 2.29803  | 3.51121  | -2.76048 |
| H | 3.60458  | 2.60625  | -3.53262 |
| H | 2.03808  | 2.74936  | -4.33733 |
| C | 2.29851  | 2.88664  | 2.16738  |
| C | 2.90897  | 4.29218  | 1.98025  |
| C | 2.72465  | 2.37500  | 3.54658  |
| H | 2.65786  | 4.69930  | 0.99822  |
| H | 2.50576  | 4.96495  | 2.74209  |
| H | 3.99469  | 4.28786  | 2.07690  |
| H | 2.31410  | 1.39259  | 3.77818  |
| H | 3.81055  | 2.30316  | 3.62913  |
| H | 2.38212  | 3.07056  | 4.31729  |

|    |          |          |          |
|----|----------|----------|----------|
| C  | 6.39683  | 1.30920  | -0.30166 |
| C  | 6.99871  | 2.28170  | -1.32321 |
| C  | 6.67974  | -0.13379 | -0.73954 |
| H  | 6.80936  | 3.32011  | -1.03912 |
| H  | 8.08075  | 2.13689  | -1.38190 |
| H  | 6.58900  | 2.12513  | -2.32316 |
| H  | 6.25222  | -0.85722 | -0.04145 |
| H  | 6.26527  | -0.34479 | -1.72737 |
| H  | 7.75911  | -0.30082 | -0.78879 |
| Cl | -2.34693 | -1.45288 | -2.06868 |
| Au | 2.67634  | -2.49329 | 0.05883  |
| Cl | 4.52856  | -3.54639 | 0.82201  |
| C  | 0.78981  | 3.10436  | 2.12002  |
| H  | 0.47599  | 3.50023  | 1.15212  |
| H  | 0.19774  | 2.21421  | 2.32343  |
| H  | 0.51031  | 3.83763  | 2.88062  |
| C  | 0.49417  | 1.49728  | -2.62180 |
| H  | -0.02490 | 0.59432  | -2.30348 |
| H  | 0.21298  | 2.32195  | -1.96207 |
| H  | 0.11688  | 1.73347  | -3.61974 |
| C  | 7.07090  | 1.54417  | 1.04742  |
| H  | 6.96695  | 2.57889  | 1.38539  |
| H  | 6.66913  | 0.88272  | 1.81882  |
| H  | 8.13976  | 1.33727  | 0.95934  |
| Ge | -1.56134 | -1.53346 | 0.02806  |
| S  | 0.87753  | -1.36586 | -0.76895 |
| C  | 1.03500  | -0.25109 | 2.04657  |
| H  | 2.09633  | -0.48452 | 2.13560  |
| H  | 0.72638  | 0.44828  | 2.81824  |
| H  | 0.46548  | -1.17595 | 2.15381  |

#### Coordination through P(sp<sup>2</sup>) atom

##### R = H

|    |          |          |          |
|----|----------|----------|----------|
| P  | 0.46370  | 0.28087  | 0.46656  |
| C  | 0.20187  | 0.15525  | -1.14340 |
| P  | -1.31374 | 0.20301  | -2.02218 |
| Ge | 1.48288  | 0.27385  | -2.80796 |
| Cl | 1.19473  | -1.89368 | -3.32034 |
| C  | -2.73110 | 0.94877  | -1.21023 |
| H  | -2.49982 | 1.98338  | -0.95562 |
| H  | -3.57778 | 0.92385  | -1.89979 |
| H  | -2.97892 | 0.39037  | -0.30441 |
| Au | -0.90253 | 0.44803  | 2.18593  |
| Cl | -2.34596 | 0.62392  | 3.91094  |
| H  | 1.86818  | 0.28826  | 0.62150  |
| H  | -1.68961 | -1.13642 | -2.23961 |
| S  | -0.73083 | 1.10583  | -3.70506 |

##### R = Me

|    |          |          |          |
|----|----------|----------|----------|
| P  | 0.50492  | 0.35272  | 0.43452  |
| C  | 0.17466  | 0.23970  | -1.16264 |
| P  | -1.40000 | 0.08397  | -1.92511 |
| Ge | 1.35047  | 0.38183  | -2.88996 |
| Cl | 1.57884  | -1.85502 | -3.09784 |
| C  | -2.70015 | 1.10350  | -1.21096 |
| H  | -2.38354 | 2.14634  | -1.22217 |
| H  | -3.60181 | 0.99410  | -1.81769 |
| H  | -2.90716 | 0.79055  | -0.18490 |
| C  | -1.95466 | -1.62332 | -1.81330 |
| H  | -2.15825 | -1.87734 | -0.77051 |
| H  | -2.85961 | -1.74498 | -2.41194 |
| H  | -1.16301 | -2.26148 | -2.20841 |
| C  | 2.28681  | 0.46292  | 0.72161  |
| H  | 2.61650  | -0.45426 | 1.21622  |

|    |          |         |          |
|----|----------|---------|----------|
| H  | 2.82979  | 0.58857 | -0.21548 |
| H  | 2.49073  | 1.29903 | 1.39329  |
| Au | -0.90904 | 0.33785 | 2.13290  |
| Cl | -2.40817 | 0.30852 | 3.82605  |
| S  | -0.95057 | 0.62597 | -3.80732 |

**R = *t*-Bu**

|    |          |          |          |
|----|----------|----------|----------|
| P  | 0.51129  | 0.42466  | 0.30127  |
| C  | 0.29935  | 0.12630  | -1.30088 |
| P  | -1.27538 | -0.11810 | -2.07489 |
| Ge | 1.47345  | 0.39252  | -3.03603 |
| Cl | 2.23824  | -1.72106 | -3.22833 |
| C  | -2.49893 | 1.10509  | -1.55773 |
| H  | -2.05969 | 2.09302  | -1.69768 |
| H  | -3.38250 | 1.01841  | -2.19161 |
| H  | -2.77396 | 0.97577  | -0.50952 |
| Au | -1.06124 | 0.65698  | 1.85474  |
| Cl | -2.69865 | 0.92254  | 3.40064  |
| C  | 2.26472  | 0.60537  | 0.86561  |
| C  | 2.36185  | 1.95322  | 1.58484  |
| C  | 2.49826  | -0.53270 | 1.86566  |
| C  | 3.26975  | 0.52724  | -0.27122 |
| H  | 2.20938  | 2.79002  | 0.89930  |
| H  | 1.63441  | 2.03649  | 2.39595  |
| H  | 3.36132  | 2.04943  | 2.01918  |
| H  | 2.45762  | -1.51050 | 1.38047  |
| H  | 3.49343  | -0.41396 | 2.30486  |
| H  | 1.76943  | -0.51763 | 2.67984  |
| H  | 4.27971  | 0.59999  | 0.14425  |
| H  | 3.20489  | -0.41720 | -0.81552 |
| H  | 3.15044  | 1.35184  | -0.97800 |
| C  | -1.99993 | -1.80325 | -1.79129 |
| C  | -0.98904 | -2.85632 | -2.23336 |
| C  | -2.35001 | -1.99803 | -0.31934 |
| C  | -3.26077 | -1.89837 | -2.65303 |
| H  | -0.71897 | -2.74497 | -3.28405 |
| H  | -0.06956 | -2.81303 | -1.64801 |
| H  | -1.43699 | -3.84447 | -2.09496 |
| H  | -3.07746 | -1.27164 | 0.04763  |
| H  | -2.79229 | -2.99140 | -0.20007 |
| H  | -1.46749 | -1.95618 | 0.32128  |
| H  | -3.64768 | -2.91867 | -2.58395 |
| H  | -4.04996 | -1.22556 | -2.31125 |
| H  | -3.04981 | -1.69286 | -3.70482 |
| S  | -0.79302 | 0.15657  | -4.01298 |

**R = Ph**

|    |          |          |          |
|----|----------|----------|----------|
| P  | 0.48849  | 0.48543  | 0.20189  |
| C  | 0.31778  | 0.06438  | -1.37497 |
| P  | -1.21220 | -0.19317 | -2.20910 |
| Ge | 1.60868  | 0.02358  | -3.01580 |
| Cl | 2.06901  | -2.19142 | -2.94139 |
| C  | -2.46222 | 1.05651  | -1.86039 |
| H  | -2.04686 | 2.03193  | -2.11474 |
| H  | -3.33366 | 0.85511  | -2.48645 |
| H  | -2.75288 | 1.04913  | -0.80839 |
| Au | -1.11781 | 0.94560  | 1.65849  |
| Cl | -2.82869 | 1.37886  | 3.07869  |
| C  | 2.19899  | 0.57851  | 0.69828  |
| C  | 3.19944  | -0.16478 | 0.06617  |
| C  | 2.52337  | 1.42091  | 1.76441  |
| C  | 4.51291  | -0.03756 | 0.48387  |
| H  | 2.94857  | -0.87138 | -0.71747 |
| C  | 3.84057  | 1.54639  | 2.16969  |
| H  | 1.74097  | 1.97828  | 2.26922  |
| C  | 4.83458  | 0.82074  | 1.52717  |

|   |          |          |          |
|---|----------|----------|----------|
| H | 5.28697  | -0.61975 | -0.00194 |
| H | 4.09135  | 2.20674  | 2.99131  |
| H | 5.86513  | 0.91470  | 1.85004  |
| C | -1.92427 | -1.79109 | -1.77179 |
| C | -2.70557 | -1.91889 | -0.62270 |
| C | -1.65607 | -2.90519 | -2.56105 |
| C | -3.22069 | -3.15633 | -0.27562 |
| H | -2.91194 | -1.06486 | 0.01276  |
| C | -2.17501 | -4.14024 | -2.20566 |
| H | -1.03893 | -2.80029 | -3.44537 |
| C | -2.95680 | -4.26587 | -1.06728 |
| H | -3.82870 | -3.25182 | 0.61620  |
| H | -1.96422 | -5.00670 | -2.82124 |
| H | -3.36192 | -5.23312 | -0.79259 |
| S | -0.61390 | -0.10493 | -4.12559 |

**R = Mes**

|    |          |          |          |
|----|----------|----------|----------|
| P  | 0.52009  | 0.53305  | 0.64793  |
| C  | 0.40454  | -0.24155 | -0.79442 |
| P  | -0.99509 | -0.43515 | -1.85670 |
| Ge | 1.97635  | -0.43169 | -2.14756 |
| Cl | 1.94746  | -2.69934 | -2.12797 |
| C  | -2.27483 | 0.78024  | -1.46826 |
| H  | -1.84290 | 1.78020  | -1.51426 |
| H  | -3.10340 | 0.70100  | -2.17116 |
| H  | -2.64868 | 0.58774  | -0.45937 |
| Au | -1.07989 | 1.19059  | 2.03155  |
| Cl | -2.73150 | 1.84097  | 3.43902  |
| C  | 2.25380  | 0.80117  | 1.06139  |
| C  | 3.01254  | -0.23464 | 1.62323  |
| C  | 2.80627  | 2.07693  | 0.86014  |
| C  | 4.33238  | 0.02952  | 1.96811  |
| C  | 4.12829  | 2.28707  | 1.21957  |
| C  | 4.90781  | 1.27816  | 1.77609  |
| H  | 4.92657  | -0.76820 | 2.40304  |
| H  | 4.56349  | 3.26890  | 1.05937  |
| C  | -1.84865 | -2.04215 | -1.87802 |
| C  | -1.76275 | -2.97194 | -0.82215 |
| C  | -2.67524 | -2.32002 | -2.98813 |
| C  | -2.48747 | -4.15291 | -0.91245 |
| C  | -3.38034 | -3.51740 | -3.01380 |
| C  | -3.29733 | -4.45351 | -1.99669 |
| H  | -2.41517 | -4.86158 | -0.09356 |
| H  | -4.01690 | -3.71939 | -3.86970 |
| C  | 2.00731  | 3.18784  | 0.24927  |
| H  | 1.75484  | 2.96701  | -0.79245 |
| H  | 1.06676  | 3.35153  | 0.78515  |
| H  | 2.56668  | 4.12347  | 0.26547  |
| C  | 2.44474  | -1.60348 | 1.84383  |
| H  | 1.43808  | -1.56183 | 2.27080  |
| H  | 2.37970  | -2.15923 | 0.90318  |
| H  | 3.07264  | -2.17654 | 2.52678  |
| C  | 6.32444  | 1.54514  | 2.18042  |
| H  | 6.35888  | 2.09734  | 3.12454  |
| H  | 6.88140  | 0.61762  | 2.31833  |
| H  | 6.84239  | 2.14948  | 1.43282  |
| C  | -0.93417 | -2.77663 | 0.40969  |
| H  | 0.12288  | -2.67986 | 0.15915  |
| H  | -1.23112 | -1.88800 | 0.97154  |
| H  | -1.04942 | -3.63612 | 1.07030  |
| C  | -2.84046 | -1.43003 | -4.18750 |
| H  | -2.88655 | -0.36666 | -3.95502 |
| H  | -2.00625 | -1.55798 | -4.88116 |
| H  | -3.76062 | -1.69188 | -4.71142 |
| C  | -4.03897 | -5.75088 | -2.07117 |
| H  | -4.90430 | -5.67881 | -2.73167 |

|   |          |          |          |
|---|----------|----------|----------|
| H | -3.39016 | -6.54074 | -2.46218 |
| H | -4.38180 | -6.07017 | -1.08526 |
| S | -0.01253 | -0.01548 | -3.57672 |

**R = Mes\***

|    |          |          |          |
|----|----------|----------|----------|
| P  | -1.08895 | 0.76522  | 0.08690  |
| C  | -0.32615 | -0.64996 | 0.43387  |
| P  | 1.35210  | -1.14820 | 0.71706  |
| Cl | -1.90963 | -2.91871 | -1.50395 |
| C  | 2.97605  | -0.48954 | 0.16082  |
| C  | 3.52686  | -1.04757 | -1.03045 |
| C  | 3.86928  | 0.07586  | 1.11251  |
| C  | 4.87651  | -1.36759 | -1.02579 |
| C  | 5.20758  | -0.30224 | 1.04837  |
| C  | 5.72212  | -1.10423 | 0.04333  |
| H  | 5.28698  | -1.83773 | -1.91047 |
| H  | 5.87505  | 0.07245  | 1.81176  |
| C  | -2.87546 | 0.42237  | 0.13426  |
| C  | -3.61489 | 0.23249  | -1.06373 |
| C  | -3.45600 | 0.08792  | 1.38376  |
| C  | -4.78593 | -0.51184 | -0.98117 |
| C  | -4.61335 | -0.68267 | 1.36860  |
| C  | -5.26382 | -1.05143 | 0.20340  |
| H  | -5.33281 | -0.70712 | -1.88835 |
| H  | -5.02764 | -1.00170 | 2.31633  |
| C  | -3.26050 | 0.87679  | -2.41769 |
| C  | -3.01456 | 0.58652  | 2.77826  |
| C  | -6.47188 | -1.97963 | 0.26142  |
| C  | 3.56116  | 1.22507  | 2.09703  |
| C  | 2.82955  | -1.15241 | -2.40170 |
| C  | 7.16216  | -1.60041 | 0.02778  |
| C  | -4.24263 | 1.23181  | 3.44925  |
| H  | -3.95341 | 1.63007  | 4.42521  |
| H  | -4.62710 | 2.05750  | 2.84583  |
| H  | -5.05757 | 0.52720  | 3.61220  |
| C  | -1.94614 | 1.67782  | 2.77426  |
| H  | -0.95170 | 1.30566  | 2.52704  |
| H  | -2.19337 | 2.49617  | 2.09333  |
| H  | -1.87247 | 2.10343  | 3.77878  |
| C  | -2.52924 | -0.57473 | 3.64927  |
| H  | -3.28778 | -1.35389 | 3.74502  |
| H  | -1.63526 | -1.03602 | 3.22546  |
| H  | -2.28701 | -0.21446 | 4.65329  |
| C  | -7.57232 | -1.34863 | 1.12213  |
| H  | -8.43860 | -2.01418 | 1.17001  |
| H  | -7.23663 | -1.16795 | 2.14535  |
| H  | -7.89959 | -0.39424 | 0.70222  |
| C  | -7.04932 | -2.26702 | -1.12196 |
| H  | -7.89239 | -2.95550 | -1.02723 |
| H  | -7.41961 | -1.36014 | -1.60704 |
| H  | -6.31180 | -2.73456 | -1.77865 |
| C  | -6.03441 | -3.31079 | 0.88531  |
| H  | -5.24719 | -3.77947 | 0.29020  |
| H  | -5.65131 | -3.17539 | 1.89896  |
| H  | -6.88311 | -3.99854 | 0.93661  |
| C  | -4.27179 | 0.51482  | -3.50981 |
| H  | -5.28607 | 0.83501  | -3.26121 |
| H  | -3.98519 | 1.03074  | -4.42868 |
| H  | -4.28130 | -0.55676 | -3.72328 |
| C  | -3.32191 | 2.40097  | -2.24675 |
| H  | -4.31888 | 2.71374  | -1.92625 |
| H  | -2.60344 | 2.76533  | -1.50909 |
| H  | -3.09630 | 2.89456  | -3.19575 |
| C  | -1.89226 | 0.45773  | -2.95740 |
| H  | -1.06142 | 0.82514  | -2.35262 |
| H  | -1.80721 | -0.62706 | -3.02512 |

|    |          |          |          |
|----|----------|----------|----------|
| H  | -1.75087 | 0.88764  | -3.95309 |
| C  | 2.17806  | 1.83939  | 1.91730  |
| H  | 2.06436  | 2.22770  | 0.90357  |
| H  | 1.34368  | 1.16960  | 2.11010  |
| H  | 2.06458  | 2.68582  | 2.59868  |
| C  | 4.53247  | 2.37018  | 1.73276  |
| H  | 4.28303  | 3.25165  | 2.32909  |
| H  | 5.57357  | 2.11660  | 1.93319  |
| H  | 4.44089  | 2.64078  | 0.67907  |
| C  | 3.82287  | 0.85688  | 3.56124  |
| H  | 4.84207  | 0.49078  | 3.70150  |
| H  | 3.70454  | 1.74576  | 4.18644  |
| H  | 3.14499  | 0.09284  | 3.93909  |
| C  | 1.38492  | -0.67392 | -2.42581 |
| H  | 1.06327  | -0.58589 | -3.46638 |
| H  | 0.69636  | -1.36627 | -1.94438 |
| H  | 1.28636  | 0.31570  | -1.97189 |
| C  | 2.90092  | -2.55946 | -3.00023 |
| H  | 2.33872  | -3.27233 | -2.39760 |
| H  | 2.46820  | -2.54666 | -4.00404 |
| H  | 3.92823  | -2.91813 | -3.09089 |
| C  | 3.60556  | -0.18539 | -3.32123 |
| H  | 3.57413  | 0.83539  | -2.93258 |
| H  | 4.65153  | -0.47069 | -3.44042 |
| H  | 3.14178  | -0.18527 | -4.31114 |
| C  | 7.91743  | -1.22409 | 1.29958  |
| H  | 8.01858  | -0.14146 | 1.41046  |
| H  | 7.42782  | -1.61891 | 2.19344  |
| H  | 8.92566  | -1.64301 | 1.26174  |
| C  | 7.90297  | -0.99661 | -1.17140 |
| H  | 7.44119  | -1.27961 | -2.11927 |
| H  | 7.91541  | 0.09457  | -1.11577 |
| H  | 8.93803  | -1.34865 | -1.18759 |
| C  | 7.15580  | -3.12887 | -0.09610 |
| H  | 6.64406  | -3.58876 | 0.75274  |
| H  | 6.65304  | -3.45858 | -1.00732 |
| H  | 8.18117  | -3.50755 | -0.12222 |
| Au | -0.18965 | 2.74069  | -0.41920 |
| Cl | 0.75032  | 4.74833  | -0.92422 |
| Ge | -1.17409 | -2.59744 | 0.60361  |
| S  | 1.20050  | -3.07789 | 0.10774  |
| C  | 1.44691  | -1.34512 | 2.52415  |
| H  | 0.64420  | -2.03959 | 2.77874  |
| H  | 2.39958  | -1.81974 | 2.76162  |
| H  | 1.32241  | -0.42978 | 3.09361  |

**Coordination through  $\pi(C=P)$  bond**

**R= H**

|    |          |          |          |
|----|----------|----------|----------|
| P  | 0.37679  | -0.07447 | 0.68499  |
| C  | 0.21246  | 0.55587  | -0.91295 |
| P  | -1.25666 | 0.62144  | -1.89331 |
| Ge | 1.54949  | 0.84041  | -2.52697 |
| Cl | 1.33378  | -1.30380 | -3.19227 |
| C  | -2.77743 | 1.19493  | -1.12210 |
| H  | -2.65762 | 2.23081  | -0.80316 |
| H  | -3.58698 | 1.12949  | -1.85231 |
| H  | -3.01010 | 0.56423  | -0.26070 |
| Au | 0.34147  | 2.28250  | 0.37300  |
| Cl | 0.41231  | 4.39704  | 1.13555  |
| H  | 1.80271  | -0.18061 | 0.69889  |
| H  | -1.53126 | -0.71336 | -2.24777 |
| S  | -0.64309 | 1.70001  | -3.45441 |



**R = Me**

|    |          |          |          |
|----|----------|----------|----------|
| P  | 0.45301  | 0.02967  | 0.63598  |
| C  | 0.16700  | 0.68727  | -0.93119 |
| P  | -1.34971 | 0.56725  | -1.84106 |
| Ge | 1.42769  | 1.09208  | -2.57482 |
| Cl | 1.74727  | -1.10482 | -3.05059 |
| C  | -2.79466 | 1.34774  | -1.09742 |
| H  | -2.61037 | 2.41445  | -0.96983 |
| H  | -3.64992 | 1.20637  | -1.76227 |
| H  | -3.00604 | 0.89162  | -0.12761 |
| C  | -1.76896 | -1.17300 | -2.03310 |
| H  | -2.03168 | -1.60156 | -1.06323 |
| H  | -2.61161 | -1.26138 | -2.72144 |
| H  | -0.90106 | -1.68713 | -2.44877 |
| C  | 2.27471  | -0.15836 | 0.71443  |
| H  | 2.50076  | -1.18400 | 0.40453  |
| H  | 2.81703  | 0.52954  | 0.06521  |
| H  | 2.60441  | -0.03274 | 1.74735  |
| Au | 0.19369  | 2.39223  | 0.39085  |
| Cl | 0.13641  | 4.46872  | 1.26329  |
| S  | -0.82666 | 1.41691  | -3.58217 |

**R = t-Bu**

|    |          |          |          |
|----|----------|----------|----------|
| P  | 0.58789  | 0.05346  | 0.41309  |
| C  | 0.10983  | 0.74679  | -1.09681 |
| P  | -1.50456 | 0.44289  | -1.81725 |
| Ge | 1.02403  | 1.63711  | -2.79284 |
| Cl | 2.02046  | -0.22159 | -3.62655 |
| C  | -2.85577 | 1.25314  | -0.92831 |
| H  | -2.68680 | 2.32979  | -0.95048 |
| H  | -3.79906 | 1.03596  | -1.43300 |
| H  | -2.90151 | 0.91259  | 0.10688  |
| Au | 0.00613  | 2.36509  | 0.35554  |
| Cl | -0.22095 | 4.34693  | 1.40888  |
| C  | -1.95463 | -1.35703 | -1.92151 |
| C  | -3.13162 | -1.48069 | -2.89094 |
| C  | -0.76712 | -2.14592 | -2.46312 |
| C  | -2.35720 | -1.87596 | -0.54148 |
| H  | -4.02015 | -0.94893 | -2.54320 |
| H  | -2.87366 | -1.11558 | -3.88628 |
| H  | -3.39647 | -2.53835 | -2.97562 |
| H  | 0.08314  | -2.13024 | -1.77974 |
| H  | -1.07335 | -3.18760 | -2.59534 |
| H  | -0.42751 | -1.76267 | -3.42612 |
| H  | -2.55165 | -2.94953 | -0.61979 |
| H  | -1.56808 | -1.73747 | 0.20101  |
| H  | -3.26987 | -1.40457 | -0.17193 |
| C  | 2.44928  | 0.04719  | 0.57620  |
| C  | 2.85935  | -1.35331 | 0.10412  |
| C  | 3.21587  | 1.11075  | -0.19091 |
| C  | 2.71000  | 0.18621  | 2.07805  |
| H  | 2.30661  | -2.14077 | 0.62583  |
| H  | 2.71158  | -1.47064 | -0.97170 |
| H  | 3.92226  | -1.50415 | 0.31886  |
| H  | 2.89641  | 2.12083  | 0.07547  |
| H  | 4.28170  | 1.02751  | 0.04837  |
| H  | 3.12651  | 0.97932  | -1.27083 |
| H  | 3.77602  | 0.03803  | 2.27491  |
| H  | 2.43511  | 1.17839  | 2.44479  |
| H  | 2.15658  | -0.55658 | 2.65933  |
| S  | -1.27396 | 1.26416  | -3.64113 |

**R = Ph**

|   |         |         |         |
|---|---------|---------|---------|
| P | 0.33359 | 0.49628 | 0.48547 |
|---|---------|---------|---------|

|    |          |          |          |
|----|----------|----------|----------|
| C  | 0.20083  | 0.66566  | -1.22685 |
| P  | -1.33025 | 0.48613  | -2.10726 |
| Ge | 1.46094  | 0.84036  | -2.92385 |
| Cl | 1.69367  | -1.37032 | -3.37153 |
| C  | -2.73813 | 1.38542  | -1.42363 |
| H  | -2.52033 | 2.45376  | -1.42699 |
| H  | -3.61030 | 1.18325  | -2.04868 |
| H  | -2.93906 | 1.05344  | -0.40306 |
| Au | 0.33978  | 2.69552  | -0.44911 |
| Cl | 0.46323  | 4.93242  | -0.19107 |
| C  | -1.83217 | -1.24895 | -2.10636 |
| C  | -2.22949 | -1.84512 | -0.90946 |
| C  | -1.83962 | -1.98383 | -3.28547 |
| C  | -2.63739 | -3.16773 | -0.89943 |
| H  | -2.21103 | -1.28630 | 0.02073  |
| C  | -2.25265 | -3.30761 | -3.26926 |
| H  | -1.50987 | -1.51904 | -4.20676 |
| C  | -2.65113 | -3.89828 | -2.08057 |
| H  | -2.94246 | -3.63023 | 0.03193  |
| H  | -2.25377 | -3.87960 | -4.18955 |
| H  | -2.96935 | -4.93448 | -2.07039 |
| C  | 2.08943  | 0.24268  | 0.84776  |
| C  | 2.96378  | -0.44885 | 0.00836  |
| C  | 2.54449  | 0.70591  | 2.08537  |
| C  | 4.28066  | -0.64416 | 0.39305  |
| H  | 2.61205  | -0.86258 | -0.93018 |
| C  | 3.86488  | 0.52132  | 2.45674  |
| H  | 1.86325  | 1.22624  | 2.75160  |
| C  | 4.73407  | -0.15289 | 1.60932  |
| H  | 4.95424  | -1.18467 | -0.26185 |
| H  | 4.21616  | 0.89942  | 3.40972  |
| H  | 5.76664  | -0.30383 | 1.90283  |
| S  | -0.81289 | 1.15658  | -3.92397 |

**R = Mes**

|    |          |          |          |
|----|----------|----------|----------|
| P  | 0.25447  | 0.42776  | 1.04715  |
| C  | -0.08205 | 0.71087  | -0.62967 |
| P  | -1.53630 | 0.55171  | -1.65841 |
| Ge | 1.29215  | 1.38155  | -2.09184 |
| Cl | 1.76288  | -0.59031 | -3.11766 |
| C  | -3.11097 | 1.19443  | -1.03245 |
| H  | -2.98535 | 2.25084  | -0.79220 |
| H  | -3.83556 | 1.09552  | -1.84473 |
| H  | -3.47202 | 0.65326  | -0.16074 |
| Au | -0.30713 | 2.64139  | 0.36278  |
| Cl | -0.73387 | 4.81305  | 0.83765  |
| C  | -1.83994 | -1.19815 | -2.08936 |
| C  | -2.17974 | -2.07393 | -1.03522 |
| C  | -1.76135 | -1.70575 | -3.40858 |
| C  | -2.35089 | -3.42764 | -1.29926 |
| C  | -1.95721 | -3.06740 | -3.60470 |
| C  | -2.22857 | -3.95288 | -2.57304 |
| H  | -2.59880 | -4.08608 | -0.47209 |
| H  | -1.89108 | -3.44774 | -4.61898 |
| C  | 2.07781  | 0.29747  | 1.10106  |
| C  | 2.60968  | -0.93761 | 0.68090  |
| C  | 2.91408  | 1.26055  | 1.68775  |
| C  | 3.97916  | -1.14148 | 0.77068  |
| C  | 4.27916  | 1.00687  | 1.75055  |
| C  | 4.83583  | -0.17427 | 1.28020  |
| H  | 4.38518  | -2.09354 | 0.44214  |
| H  | 4.92600  | 1.75819  | 2.19381  |
| C  | 2.39833  | 2.54732  | 2.25603  |
| H  | 2.19795  | 3.28701  | 1.47483  |
| H  | 1.46810  | 2.40904  | 2.81340  |
| H  | 3.13104  | 2.98389  | 2.93633  |

|   |          |          |          |
|---|----------|----------|----------|
| C | 1.73688  | -2.05190 | 0.18288  |
| H | 0.88119  | -2.22129 | 0.84578  |
| H | 1.34818  | -1.84656 | -0.81726 |
| H | 2.30298  | -2.98287 | 0.13354  |
| C | 6.31495  | -0.40169 | 1.32301  |
| H | 6.78621  | 0.18328  | 2.11459  |
| H | 6.55221  | -1.45500 | 1.48393  |
| H | 6.77635  | -0.10485 | 0.37591  |
| C | -2.45176 | -1.65778 | 0.38297  |
| H | -2.15195 | -2.45096 | 1.06950  |
| H | -1.93812 | -0.75425 | 0.70272  |
| H | -3.52536 | -1.49981 | 0.52865  |
| C | -1.50891 | -0.89749 | -4.64753 |
| H | -2.19841 | -0.05915 | -4.74555 |
| H | -0.49840 | -0.48933 | -4.66177 |
| H | -1.63009 | -1.53860 | -5.52136 |
| C | -2.37673 | -5.41890 | -2.83169 |
| H | -2.89253 | -5.60556 | -3.77557 |
| H | -1.39440 | -5.89653 | -2.89903 |
| H | -2.93000 | -5.91260 | -2.03148 |
| S | -0.93745 | 1.81378  | -3.11335 |

**R = Mes\***

|    |          |          |          |
|----|----------|----------|----------|
| P  | 0.70686  | -0.02716 | 1.03587  |
| C  | 0.42586  | 0.14718  | -0.68284 |
| P  | -1.12795 | -0.04551 | -1.64941 |
| Cl | 2.93137  | -0.96013 | -2.97015 |
| Au | 0.27974  | 2.17230  | 0.11541  |
| Cl | -0.16518 | 4.40129  | 0.23899  |
| C  | 2.55565  | -0.06817 | 1.18253  |
| C  | 3.28734  | -1.19988 | 0.73071  |
| C  | 3.28518  | 1.07299  | 1.60328  |
| C  | 4.60930  | -1.01527 | 0.35465  |
| C  | 4.60283  | 1.19659  | 1.16150  |
| C  | 5.26440  | 0.20499  | 0.45884  |
| H  | 5.15421  | -1.86729 | -0.03142 |
| H  | 5.13577  | 2.10327  | 1.41197  |
| C  | 2.86562  | 2.09412  | 2.68386  |
| C  | 2.82825  | -2.66599 | 0.85503  |
| C  | 6.67175  | 0.37555  | -0.10045 |
| C  | 3.85610  | 1.88555  | 3.84945  |
| H  | 3.80138  | 0.86276  | 4.23113  |
| H  | 4.88748  | 2.07846  | 3.55356  |
| H  | 3.60580  | 2.56904  | 4.66545  |
| C  | 2.98647  | 3.54185  | 2.20297  |
| H  | 2.30498  | 3.75898  | 1.37987  |
| H  | 2.73987  | 4.22335  | 3.02178  |
| H  | 4.00017  | 3.77750  | 1.87434  |
| C  | 1.48348  | 1.88034  | 3.29493  |
| H  | 1.38836  | 2.51505  | 4.18002  |
| H  | 0.66487  | 2.16245  | 2.63018  |
| H  | 1.33492  | 0.84591  | 3.61563  |
| C  | 3.09696  | -3.47955 | -0.41234 |
| H  | 2.58735  | -3.05448 | -1.27469 |
| H  | 4.16045  | -3.52783 | -0.65086 |
| H  | 2.75055  | -4.50688 | -0.26710 |
| C  | 3.66118  | -3.26442 | 2.00484  |
| H  | 4.72965  | -3.22876 | 1.78756  |
| H  | 3.48975  | -2.72148 | 2.93782  |
| H  | 3.37982  | -4.31038 | 2.15973  |
| C  | 1.36921  | -2.85499 | 1.25030  |
| H  | 1.12901  | -2.34893 | 2.18968  |
| H  | 0.67820  | -2.51885 | 0.47636  |
| H  | 1.17525  | -3.92058 | 1.40369  |
| C  | 7.21683  | 1.78292  | 0.12701  |
| H  | 6.57592  | 2.54271  | -0.32696 |

|    |          |          |          |
|----|----------|----------|----------|
| H  | 7.32606  | 2.01341  | 1.19013  |
| H  | 8.20594  | 1.86819  | -0.32933 |
| C  | 6.63571  | 0.10950  | -1.61000 |
| H  | 7.63925  | 0.21149  | -2.03301 |
| H  | 6.27190  | -0.89446 | -1.83587 |
| H  | 5.97516  | 0.81596  | -2.11739 |
| C  | 7.62308  | -0.62313 | 0.56898  |
| H  | 7.66255  | -0.46384 | 1.64959  |
| H  | 7.31855  | -1.65649 | 0.39154  |
| H  | 8.63410  | -0.50281 | 0.16982  |
| C  | -2.37431 | -1.42674 | -1.67657 |
| C  | -2.35153 | -2.33036 | -2.77890 |
| C  | -3.61757 | -1.22831 | -1.01371 |
| C  | -3.55765 | -2.61484 | -3.40497 |
| C  | -1.16143 | -3.20697 | -3.21164 |
| C  | -4.78423 | -1.57421 | -1.68869 |
| C  | -3.80842 | -0.85741 | 0.47042  |
| C  | -4.78663 | -2.16898 | -2.94032 |
| H  | -3.52912 | -3.24253 | -4.28705 |
| C  | -0.77324 | -3.03871 | -4.68206 |
| C  | -1.62990 | -4.66464 | -3.00809 |
| C  | 0.05740  | -3.04876 | -2.31877 |
| H  | -5.72843 | -1.37494 | -1.20109 |
| C  | -2.51533 | -0.56634 | 1.21367  |
| C  | -4.38684 | -2.12785 | 1.12893  |
| C  | -4.80458 | 0.28402  | 0.69720  |
| C  | -6.05738 | -2.43020 | -3.73834 |
| H  | -0.02119 | -3.78728 | -4.94491 |
| H  | -1.62970 | -3.18440 | -5.34443 |
| H  | -0.35256 | -2.05394 | -4.87528 |
| H  | -2.44220 | -4.94367 | -3.68016 |
| H  | -0.78971 | -5.33612 | -3.20394 |
| H  | -1.96623 | -4.83145 | -1.98172 |
| H  | 0.53757  | -2.07705 | -2.40590 |
| H  | -0.20639 | -3.23732 | -1.27607 |
| H  | 0.80875  | -3.78722 | -2.60668 |
| H  | -1.78547 | -1.36422 | 1.06588  |
| H  | -2.05074 | 0.38138  | 0.94366  |
| H  | -2.71486 | -0.50681 | 2.28618  |
| H  | -4.51580 | -1.95433 | 2.20084  |
| H  | -5.35583 | -2.40216 | 0.71055  |
| H  | -3.71035 | -2.97588 | 0.99946  |
| H  | -5.79025 | 0.05590  | 0.28854  |
| H  | -4.92779 | 0.44892  | 1.77062  |
| H  | -4.47523 | 1.22491  | 0.25494  |
| C  | -7.29503 | -1.84767 | -3.06120 |
| C  | -6.26283 | -3.94067 | -3.90468 |
| C  | -5.91221 | -1.78249 | -5.12064 |
| H  | -7.49456 | -2.32069 | -2.09621 |
| H  | -7.20214 | -0.76999 | -2.90493 |
| H  | -8.16970 | -2.01667 | -3.69349 |
| H  | -5.43261 | -4.40776 | -4.43790 |
| H  | -6.35880 | -4.43266 | -2.93367 |
| H  | -7.17520 | -4.13361 | -4.47553 |
| H  | -5.77997 | -0.70126 | -5.03484 |
| H  | -5.05480 | -2.18157 | -5.66602 |
| H  | -6.80793 | -1.96963 | -5.71902 |
| Ge | 1.69932  | 0.80814  | -2.26908 |
| S  | -0.33868 | 0.21244  | -3.49826 |
| C  | -2.23786 | 1.39370  | -1.52088 |
| H  | -2.68252 | 1.53441  | -0.54097 |
| H  | -1.66787 | 2.28035  | -1.79746 |
| H  | -3.02141 | 1.23466  | -2.26456 |

**E = Sn(II)****[R-P=C(Sn(II)Cl)-P(O)ClR](AuCl)****Coordination through Sn(II) atom****R = H**

|    |          |          |          |
|----|----------|----------|----------|
| P  | 0.62299  | -0.11936 | 1.17170  |
| C  | 0.46874  | -0.20995 | -0.47570 |
| P  | -1.00898 | -0.20105 | -1.41453 |
| Cl | 1.76906  | -2.39992 | -2.79309 |
| Sn | 1.66528  | -0.10131 | -2.35345 |
| O  | -0.50492 | 0.08468  | -2.81819 |
| Au | 3.24817  | 1.65597  | -3.16505 |
| Cl | 4.67816  | 3.27994  | -3.83372 |
| Cl | -2.37544 | 1.11793  | -0.80137 |
| H  | 2.05016  | -0.12229 | 1.23741  |
| H  | -1.73264 | -1.40193 | -1.34112 |

**R = Me**

|    |          |          |          |
|----|----------|----------|----------|
| P  | 0.65946  | -0.14886 | 1.15963  |
| C  | 0.48873  | -0.22294 | -0.48386 |
| P  | -1.00156 | -0.25811 | -1.40336 |
| Cl | 1.81396  | -2.37672 | -2.83387 |
| Sn | 1.64410  | -0.07304 | -2.37048 |
| O  | -0.50118 | 0.05217  | -2.81306 |
| C  | 2.46780  | -0.12916 | 1.43822  |
| H  | 2.76991  | -1.12754 | 1.77171  |
| H  | 3.04254  | 0.14274  | 0.55247  |
| H  | 2.69412  | 0.56299  | 2.25265  |
| C  | -1.89561 | -1.80031 | -1.33073 |
| H  | -2.25224 | -1.98145 | -0.31621 |
| H  | -2.73826 | -1.75694 | -2.02276 |
| H  | -1.20560 | -2.59022 | -1.63613 |
| Au | 3.23474  | 1.67259  | -3.19774 |
| Cl | 4.68802  | 3.28445  | -3.85656 |
| Cl | -2.33130 | 1.12381  | -0.80231 |

**R = t-Bu**

|    |          |          |          |
|----|----------|----------|----------|
| P  | 0.72093  | -0.59641 | 0.91863  |
| C  | 0.69392  | -0.19926 | -0.68803 |
| P  | -0.72888 | -0.20434 | -1.72694 |
| Cl | 2.77861  | -1.50383 | -3.18190 |
| Sn | 1.93129  | 0.54328  | -2.37694 |
| O  | -0.13138 | 0.25781  | -3.05750 |
| Au | 3.03394  | 2.75363  | -2.79506 |
| Cl | 4.02733  | 4.77494  | -3.08968 |
| C  | 2.47070  | -0.43984 | 1.54790  |
| C  | 2.83160  | -1.83722 | 2.06427  |
| C  | 3.49848  | 0.03614  | 0.54065  |
| C  | 2.38115  | 0.53565  | 2.72692  |
| H  | 2.09030  | -2.21376 | 2.77466  |
| H  | 2.92146  | -2.55819 | 1.24806  |
| H  | 3.79490  | -1.79369 | 2.58217  |
| H  | 3.27574  | 1.04177  | 0.17238  |
| H  | 4.48450  | 0.08770  | 1.01363  |
| H  | 3.58986  | -0.65361 | -0.30399 |
| H  | 3.34740  | 0.57393  | 3.23946  |
| H  | 2.13673  | 1.54816  | 2.39669  |
| H  | 1.62943  | 0.22401  | 3.45735  |
| C  | -1.67731 | -1.75612 | -1.91724 |
| C  | -2.72788 | -1.52955 | -3.00610 |
| C  | -0.67739 | -2.82631 | -2.36531 |
| C  | -2.33231 | -2.15127 | -0.59746 |
| H  | -3.46805 | -0.78453 | -2.70986 |
| H  | -2.27126 | -1.21469 | -3.94588 |
| H  | -3.25086 | -2.47376 | -3.18072 |

|    |          |          |          |
|----|----------|----------|----------|
| H  | 0.09118  | -3.01079 | -1.61289 |
| H  | -1.22568 | -3.75859 | -2.52503 |
| H  | -0.18216 | -2.55770 | -3.29928 |
| H  | -2.84896 | -3.10434 | -0.73968 |
| H  | -1.59904 | -2.28734 | 0.20097  |
| H  | -3.06781 | -1.41513 | -0.26990 |
| Cl | -2.06127 | 1.16827  | -1.07359 |

**R = Ph**

|    |          |          |          |
|----|----------|----------|----------|
| P  | 0.85065  | -0.00992 | 1.38093  |
| C  | 0.44323  | -0.32759 | -0.19516 |
| P  | -1.15545 | -0.41561 | -0.90099 |
| Cl | 1.62148  | -2.59892 | -2.60840 |
| Sn | 1.35688  | -0.28760 | -2.20239 |
| O  | -0.83910 | -0.29604 | -2.38998 |
| Au | 2.71232  | 1.45764  | -3.38060 |
| Cl | 3.96225  | 3.05807  | -4.39710 |
| C  | 2.65268  | -0.05090 | 1.40164  |
| C  | 3.28123  | 0.76472  | 2.34662  |
| C  | 3.43454  | -0.84877 | 0.56039  |
| C  | 4.66370  | 0.82717  | 2.40845  |
| H  | 2.68112  | 1.36597  | 3.02257  |
| C  | 4.81489  | -0.79563 | 0.63614  |
| H  | 2.96230  | -1.54816 | -0.12274 |
| C  | 5.42960  | 0.05078  | 1.55104  |
| H  | 5.14420  | 1.47965  | 3.12793  |
| H  | 5.41461  | -1.41914 | -0.01648 |
| H  | 6.51132  | 0.09494  | 1.60233  |
| C  | -2.09203 | -1.89037 | -0.54174 |
| C  | -2.10108 | -2.90500 | -1.49624 |
| C  | -2.74615 | -2.05910 | 0.67783  |
| C  | -2.77417 | -4.08671 | -1.22710 |
| H  | -1.58575 | -2.76600 | -2.43856 |
| C  | -3.41078 | -3.24384 | 0.93719  |
| H  | -2.74344 | -1.26623 | 1.41722  |
| C  | -3.42523 | -4.25587 | -0.01500 |
| H  | -2.78742 | -4.87630 | -1.96884 |
| H  | -3.92338 | -3.37793 | 1.88230  |
| H  | -3.95009 | -5.18158 | 0.19131  |
| Cl | -2.32001 | 1.10798  | -0.28460 |

**R = Mes**

|    |          |          |          |
|----|----------|----------|----------|
| P  | 0.95963  | -0.30883 | 1.98639  |
| C  | 0.37042  | -0.45452 | 0.44326  |
| P  | -1.21479 | -0.40858 | -0.31431 |
| Cl | 1.55676  | -2.09253 | -2.43560 |
| Sn | 1.35661  | 0.04571  | -1.45181 |
| O  | -0.83467 | 0.16722  | -1.67833 |
| Au | 2.82493  | 1.98260  | -2.06638 |
| Cl | 4.20355  | 3.74392  | -2.48678 |
| C  | 2.74496  | -0.13747 | 1.65314  |
| C  | 3.31807  | 1.14158  | 1.73884  |
| C  | 3.53272  | -1.25583 | 1.34196  |
| C  | 4.66871  | 1.28724  | 1.45930  |
| C  | 4.88320  | -1.05871 | 1.07728  |
| C  | 5.46640  | 0.20186  | 1.11446  |
| H  | 5.10674  | 2.27997  | 1.49720  |
| H  | 5.49849  | -1.92047 | 0.83651  |
| C  | -2.12965 | -1.94550 | -0.40249 |
| C  | -2.60431 | -2.43473 | -1.64139 |
| C  | -2.36873 | -2.66591 | 0.78648  |
| C  | -3.27721 | -3.64982 | -1.64327 |
| C  | -3.05014 | -3.87174 | 0.71275  |
| C  | -3.50343 | -4.38940 | -0.49117 |
| H  | -3.64770 | -4.02612 | -2.59138 |
| H  | -3.23646 | -4.41824 | 1.63192  |

|    |          |          |          |
|----|----------|----------|----------|
| Cl | -2.44169 | 0.92717  | 0.59388  |
| C  | -1.91475 | -2.21092 | 2.14000  |
| H  | -0.86311 | -2.46207 | 2.30501  |
| H  | -2.02072 | -1.13640 | 2.29300  |
| H  | -2.49496 | -2.71143 | 2.91577  |
| C  | -4.20562 | -5.70882 | -0.55024 |
| H  | -3.49161 | -6.51109 | -0.76121 |
| H  | -4.69385 | -5.94451 | 0.39651  |
| H  | -4.95632 | -5.72530 | -1.34209 |
| C  | -2.44976 | -1.73983 | -2.96264 |
| H  | -2.79439 | -0.70648 | -2.93357 |
| H  | -1.40610 | -1.71610 | -3.28034 |
| H  | -3.02456 | -2.27400 | -3.71925 |
| C  | 2.48827  | 2.34554  | 2.07119  |
| H  | 1.93753  | 2.69909  | 1.19354  |
| H  | 1.75241  | 2.13355  | 2.85440  |
| H  | 3.11535  | 3.16920  | 2.41375  |
| C  | 2.95974  | -2.64268 | 1.29893  |
| H  | 2.30064  | -2.83381 | 2.15164  |
| H  | 2.37215  | -2.81129 | 0.39199  |
| H  | 3.75626  | -3.38735 | 1.32061  |
| C  | 6.91207  | 0.39850  | 0.78005  |
| H  | 7.01455  | 0.92963  | -0.17066 |
| H  | 7.41613  | 0.99943  | 1.54055  |
| H  | 7.43572  | -0.55417 | 0.69227  |

**R = Mes\***

|    |          |          |          |
|----|----------|----------|----------|
| P  | -0.18588 | 2.27013  | 1.12057  |
| C  | 0.26410  | 0.79941  | 0.48854  |
| P  | 1.78830  | -0.06250 | 0.26080  |
| Cl | -1.16024 | 0.33551  | -2.78457 |
| O  | 1.38974  | -0.97023 | -0.90658 |
| C  | 3.51729  | 0.45998  | 0.06468  |
| C  | 4.06992  | 0.33166  | -1.24520 |
| C  | 4.39881  | 0.50012  | 1.17691  |
| C  | 5.37064  | -0.13739 | -1.34088 |
| C  | 5.69914  | 0.04482  | 0.98692  |
| C  | 6.18145  | -0.38024 | -0.23963 |
| H  | 5.77446  | -0.30754 | -2.33012 |
| H  | 6.35882  | 0.02893  | 1.84285  |
| C  | -1.99897 | 2.20449  | 0.83817  |
| C  | -2.55833 | 2.94094  | -0.23212 |
| C  | -2.80133 | 1.29115  | 1.56476  |
| C  | -3.80513 | 2.54388  | -0.70703 |
| C  | -4.02261 | 0.92627  | 1.00912  |
| C  | -4.52170 | 1.48966  | -0.15787 |
| H  | -4.22538 | 3.06592  | -1.55158 |
| H  | -4.61827 | 0.18061  | 1.51895  |
| C  | -1.89353 | 4.19648  | -0.82879 |
| C  | -2.48515 | 0.77468  | 2.98517  |
| C  | -5.83361 | 0.98452  | -0.74937 |
| C  | 4.13217  | 1.16744  | 2.54082  |
| C  | 3.41870  | 0.80808  | -2.55855 |
| C  | 7.56124  | -0.99859 | -0.42238 |
| C  | -3.77244 | 0.82375  | 3.82687  |
| H  | -3.52941 | 0.58890  | 4.86605  |
| H  | -4.23112 | 1.81494  | 3.79840  |
| H  | -4.51424 | 0.09396  | 3.50215  |
| C  | -1.48053 | 1.66034  | 3.72067  |
| H  | -0.46353 | 1.58500  | 3.31856  |
| H  | -1.77836 | 2.71171  | 3.70968  |
| H  | -1.40737 | 1.33916  | 4.76318  |
| C  | -1.97732 | -0.66854 | 2.98322  |
| H  | -2.67054 | -1.33714 | 2.46827  |
| H  | -1.00227 | -0.75236 | 2.50081  |
| H  | -1.86966 | -1.02692 | 4.01116  |

|    |          |          |          |
|----|----------|----------|----------|
| C  | -6.96108 | 1.14659  | 0.27716  |
| H  | -7.90367 | 0.78663  | -0.14392 |
| H  | -6.76821 | 0.57675  | 1.18809  |
| H  | -7.09111 | 2.19557  | 0.55575  |
| C  | -6.22677 | 1.74159  | -2.01515 |
| H  | -7.15589 | 1.32557  | -2.41152 |
| H  | -6.39928 | 2.80372  | -1.82124 |
| H  | -5.46602 | 1.65025  | -2.79433 |
| C  | -5.67730 | -0.49915 | -1.10447 |
| H  | -4.89157 | -0.64290 | -1.85000 |
| H  | -5.42361 | -1.10722 | -0.23404 |
| H  | -6.61227 | -0.88610 | -1.51873 |
| C  | -2.80942 | 4.90101  | -1.83253 |
| H  | -3.77000 | 5.17574  | -1.39095 |
| H  | -2.32314 | 5.82127  | -2.16404 |
| H  | -2.99422 | 4.29167  | -2.72016 |
| C  | -1.62068 | 5.19609  | 0.30404  |
| H  | -2.54613 | 5.45755  | 0.82270  |
| H  | -0.91915 | 4.80440  | 1.04396  |
| H  | -1.18747 | 6.11319  | -0.10490 |
| C  | -0.58909 | 3.89011  | -1.56893 |
| H  | 0.20531  | 3.55099  | -0.89779 |
| H  | -0.73204 | 3.12010  | -2.32821 |
| H  | -0.22128 | 4.79923  | -2.05375 |
| C  | 2.75131  | 1.79105  | 2.68283  |
| H  | 2.52099  | 2.44862  | 1.84158  |
| H  | 1.95809  | 1.05319  | 2.78995  |
| H  | 2.72695  | 2.40725  | 3.58497  |
| C  | 5.12764  | 2.34343  | 2.62575  |
| H  | 4.96393  | 2.88667  | 3.56029  |
| H  | 6.16595  | 2.01155  | 2.60808  |
| H  | 4.98137  | 3.04025  | 1.79690  |
| C  | 4.39041  | 0.22934  | 3.72323  |
| H  | 5.40604  | -0.17003 | 3.71478  |
| H  | 4.26281  | 0.78045  | 4.65878  |
| H  | 3.69705  | -0.61116 | 3.72874  |
| C  | 2.23040  | 1.73597  | -2.32356 |
| H  | 1.91411  | 2.16350  | -3.27774 |
| H  | 1.35404  | 1.23542  | -1.92225 |
| H  | 2.50432  | 2.56252  | -1.66235 |
| C  | 3.03326  | -0.35574 | -3.47571 |
| H  | 2.26832  | -0.98428 | -3.02605 |
| H  | 2.65010  | 0.03437  | -4.42237 |
| H  | 3.90339  | -0.97835 | -3.69907 |
| C  | 4.45811  | 1.67304  | -3.30098 |
| H  | 4.82994  | 2.48222  | -2.66773 |
| H  | 5.31334  | 1.10041  | -3.66025 |
| H  | 3.97942  | 2.11931  | -4.17602 |
| C  | 8.28650  | -1.19807 | 0.90568  |
| H  | 8.49216  | -0.24865 | 1.40678  |
| H  | 7.71576  | -1.83301 | 1.58790  |
| H  | 9.24726  | -1.68565 | 0.72550  |
| C  | 8.42018  | -0.09148 | -1.31174 |
| H  | 7.97977  | 0.04417  | -2.30138 |
| H  | 8.54511  | 0.89594  | -0.86056 |
| H  | 9.41181  | -0.53169 | -1.44652 |
| C  | 7.40079  | -2.36712 | -1.09575 |
| H  | 6.80003  | -3.03953 | -0.47887 |
| H  | 6.91594  | -2.28493 | -2.07043 |
| H  | 8.38103  | -2.82707 | -1.24668 |
| Au | -2.20344 | -2.73916 | -0.17893 |
| Cl | -3.53515 | -4.51082 | 0.35366  |
| Sn | -0.79756 | -0.72731 | -0.70657 |
| Cl | 1.88480  | -1.34726 | 1.85155  |

**Coordination through O atom****R= H**

|    |          |          |          |
|----|----------|----------|----------|
| P  | 0.72527  | -0.02047 | 1.06870  |
| C  | 0.51102  | -0.15236 | -0.56938 |
| P  | -0.99308 | 0.00727  | -1.40894 |
| Cl | 1.18388  | -2.45767 | -2.93096 |
| Sn | 1.76630  | -0.18509 | -2.49632 |
| O  | -0.54690 | 0.49003  | -2.79687 |
| Au | -1.84188 | 0.77350  | -4.44094 |
| Cl | -3.19320 | 1.07450  | -6.17671 |
| Cl | -2.34218 | 1.23247  | -0.59621 |
| H  | -1.70584 | -1.19668 | -1.49971 |
| H  | 2.14521  | -0.20309 | 1.10154  |

**R = Me**

|    |          |          |          |
|----|----------|----------|----------|
| P  | 0.72897  | -0.07462 | 1.05993  |
| C  | 0.51549  | -0.14741 | -0.57906 |
| P  | -1.01160 | -0.01425 | -1.38472 |
| Cl | 1.37878  | -2.39803 | -2.98859 |
| Sn | 1.72565  | -0.06897 | -2.52882 |
| O  | -0.57159 | 0.42656  | -2.80087 |
| C  | 2.53077  | -0.31855 | 1.30282  |
| H  | 2.69305  | -1.35698 | 1.61002  |
| H  | 3.12135  | -0.11912 | 0.40796  |
| H  | 2.87293  | 0.31720  | 2.12256  |
| C  | -1.96569 | -1.51845 | -1.43867 |
| H  | -2.27800 | -1.79064 | -0.42961 |
| H  | -2.83794 | -1.36644 | -2.07739 |
| H  | -1.32218 | -2.29428 | -1.86063 |
| Au | -1.86365 | 0.68521  | -4.44506 |
| Cl | -3.22153 | 0.95680  | -6.18261 |
| Cl | -2.25539 | 1.36207  | -0.61157 |

**R = t-Bu**

|    |          |          |          |
|----|----------|----------|----------|
| P  | 0.79051  | -0.60970 | 0.94337  |
| C  | 0.44557  | -0.10446 | -0.59654 |
| P  | -1.17225 | -0.08674 | -1.24758 |
| Cl | 2.00710  | -1.10748 | -3.50919 |
| Sn | 1.39851  | 0.94306  | -2.41355 |
| O  | -0.94211 | 0.61487  | -2.60662 |
| Au | -2.27481 | 1.46369  | -3.99676 |
| Cl | -3.64207 | 2.38151  | -5.48972 |
| C  | 2.63807  | -0.49809 | 1.20389  |
| C  | 3.09463  | -1.94592 | 1.41582  |
| C  | 3.42369  | 0.14251  | 0.07662  |
| C  | 2.82048  | 0.29222  | 2.50306  |
| H  | 2.52228  | -2.44136 | 2.20509  |
| H  | 2.99892  | -2.53586 | 0.50113  |
| H  | 4.14768  | -1.95563 | 1.71543  |
| H  | 3.11353  | 1.17879  | -0.09203 |
| H  | 4.48906  | 0.16956  | 0.32902  |
| H  | 3.33292  | -0.42902 | -0.85234 |
| H  | 3.87528  | 0.27998  | 2.79518  |
| H  | 2.51570  | 1.33565  | 2.38849  |
| H  | 2.24263  | -0.14000 | 3.32442  |
| C  | -2.04540 | -1.68626 | -1.44439 |
| C  | -3.39951 | -1.45197 | -2.11505 |
| C  | -1.15917 | -2.56290 | -2.33378 |
| C  | -2.23755 | -2.33194 | -0.07413 |
| H  | -4.05989 | -0.83545 | -1.50371 |
| H  | -3.29975 | -0.98338 | -3.09630 |
| H  | -3.87919 | -2.42468 | -2.25483 |
| H  | -0.17792 | -2.74308 | -1.89198 |
| H  | -1.65812 | -3.52721 | -2.46218 |

|    |          |          |          |
|----|----------|----------|----------|
| H  | -1.00984 | -2.12392 | -3.32098 |
| H  | -2.72895 | -3.29772 | -0.21929 |
| H  | -1.28878 | -2.51460 | 0.43469  |
| H  | -2.87045 | -1.72793 | 0.57822  |
| Cl | -2.40128 | 1.07058  | -0.13670 |

**R = Ph**

|    |          |          |          |
|----|----------|----------|----------|
| P  | 0.71433  | 0.22445  | 0.86664  |
| C  | 0.53476  | -0.25601 | -0.71074 |
| P  | -0.91456 | -0.20128 | -1.65136 |
| Cl | 1.82109  | -2.82567 | -2.70486 |
| Sn | 1.96053  | -0.43600 | -2.47731 |
| O  | -0.34752 | -0.12352 | -3.08367 |
| Au | -1.41959 | 0.07833  | -4.88460 |
| Cl | -2.51560 | 0.28842  | -6.80757 |
| C  | 2.46307  | -0.09898 | 1.20297  |
| C  | 3.19380  | -1.13067 | 0.60344  |
| C  | 3.09453  | 0.72818  | 2.13500  |
| C  | 4.53581  | -1.30035 | 0.90202  |
| H  | 2.69598  | -1.83660 | -0.05531 |
| C  | 4.44043  | 0.56418  | 2.42079  |
| H  | 2.52846  | 1.51330  | 2.62682  |
| C  | 5.16186  | -0.44702 | 1.80187  |
| H  | 5.09168  | -2.10855 | 0.44077  |
| H  | 4.92650  | 1.22216  | 3.13176  |
| H  | 6.21226  | -0.58168 | 2.03307  |
| C  | -2.01363 | -1.59133 | -1.45537 |
| C  | -2.93121 | -1.63600 | -0.40643 |
| C  | -1.89294 | -2.66407 | -2.33653 |
| C  | -3.73008 | -2.75330 | -0.24597 |
| H  | -3.02908 | -0.79821 | 0.27421  |
| C  | -2.70241 | -3.77619 | -2.16848 |
| H  | -1.17401 | -2.63098 | -3.14545 |
| C  | -3.61672 | -3.82108 | -1.12757 |
| H  | -4.44883 | -2.78890 | 0.56398  |
| H  | -2.61743 | -4.60712 | -2.85824 |
| H  | -4.24955 | -4.69219 | -1.00241 |
| Cl | -2.04064 | 1.42719  | -1.27582 |

**R = Mes**

|    |          |          |          |
|----|----------|----------|----------|
| P  | 0.59263  | -0.06959 | 1.29882  |
| C  | 0.33723  | -0.34726 | -0.31271 |
| P  | -1.04718 | -0.25722 | -1.35769 |
| Cl | 2.00528  | -2.52554 | -2.42781 |
| Sn | 1.93496  | -0.17463 | -1.90746 |
| O  | -0.36121 | 0.11880  | -2.68677 |
| Au | -0.96916 | 1.37434  | -4.26944 |
| Cl | -1.54267 | 2.70501  | -5.95668 |
| C  | 2.41764  | -0.19300 | 1.39436  |
| C  | 3.04895  | -1.44623 | 1.46237  |
| C  | 3.17060  | 0.98919  | 1.48077  |
| C  | 4.43332  | -1.48576 | 1.57531  |
| C  | 4.55211  | 0.89730  | 1.59012  |
| C  | 5.20332  | -0.32972 | 1.63080  |
| H  | 4.92379  | -2.45298 | 1.63260  |
| H  | 5.13482  | 1.81167  | 1.65299  |
| C  | -2.06259 | -1.73280 | -1.44813 |
| C  | -2.75496 | -2.13459 | -0.28343 |
| C  | -2.14484 | -2.51125 | -2.62726 |
| C  | -3.48799 | -3.31130 | -0.31203 |
| C  | -2.90589 | -3.67322 | -2.58581 |
| C  | -3.58012 | -4.09676 | -1.45082 |
| H  | -4.00724 | -3.61821 | 0.59038  |
| H  | -2.96519 | -4.27355 | -3.48772 |
| Cl | -2.28292 | 1.28182  | -0.89829 |
| C  | 2.50961  | 2.33539  | 1.43833  |

|   |          |          |          |
|---|----------|----------|----------|
| H | 2.16076  | 2.58188  | 0.43038  |
| H | 1.63500  | 2.37851  | 2.09562  |
| H | 3.20079  | 3.11981  | 1.74846  |
| C | 6.69622  | -0.40582 | 1.72056  |
| H | 7.13992  | -0.46820 | 0.72199  |
| H | 7.11200  | 0.47714  | 2.20864  |
| H | 7.01733  | -1.28957 | 2.27463  |
| C | 2.26611  | -2.72512 | 1.43067  |
| H | 1.39802  | -2.68231 | 2.09573  |
| H | 1.89333  | -2.94018 | 0.42528  |
| H | 2.88767  | -3.56467 | 1.74398  |
| C | -2.78899 | -1.34517 | 0.99061  |
| H | -3.50560 | -0.52329 | 0.91942  |
| H | -3.09878 | -1.98630 | 1.81633  |
| H | -1.82733 | -0.90718 | 1.26162  |
| C | -1.48144 | -2.19071 | -3.93296 |
| H | -1.80782 | -1.22898 | -4.33486 |
| H | -0.39588 | -2.15528 | -3.84019 |
| H | -1.73263 | -2.95938 | -4.66335 |
| C | -4.40332 | -5.34552 | -1.46536 |
| H | -4.49237 | -5.77666 | -0.46712 |
| H | -5.41534 | -5.13121 | -1.82294 |
| H | -3.97505 | -6.09624 | -2.13151 |

**R = Mes\***

|   |          |          |          |
|---|----------|----------|----------|
| P | 1.88951  | 2.17246  | -0.11508 |
| C | 0.96328  | 0.80172  | -0.22639 |
| P | -0.75000 | 0.52089  | -0.33576 |
| C | 3.56695  | 1.40509  | -0.15668 |
| C | 4.31865  | 1.31745  | 1.04474  |
| C | 4.01811  | 0.73315  | -1.31281 |
| C | 5.32798  | 0.36921  | 1.10731  |
| C | 5.01788  | -0.23360 | -1.15905 |
| C | 5.64946  | -0.47437 | 0.04696  |
| H | 5.87967  | 0.25946  | 2.02933  |
| H | 5.32550  | -0.79267 | -2.03227 |
| C | 3.64804  | 1.08455  | -2.77142 |
| C | 4.09953  | 2.25872  | 2.24348  |
| C | 6.70167  | -1.56252 | 0.23206  |
| C | 2.75934  | 2.01368  | 2.94222  |
| H | 1.90532  | 2.29153  | 2.31880  |
| H | 2.63918  | 0.96400  | 3.21475  |
| H | 2.70088  | 2.62417  | 3.84812  |
| C | 4.17906  | 3.71371  | 1.76143  |
| H | 5.14596  | 3.91589  | 1.29411  |
| H | 3.39721  | 3.95735  | 1.03905  |
| H | 4.06211  | 4.39285  | 2.61044  |
| C | 5.18662  | 2.08529  | 3.30706  |
| H | 5.14489  | 1.10315  | 3.78358  |
| H | 6.18926  | 2.23556  | 2.89969  |
| H | 5.03265  | 2.83203  | 4.08920  |
| C | 3.00556  | -0.09631 | -3.50335 |
| H | 2.01462  | -0.32207 | -3.10249 |
| H | 2.88187  | 0.14452  | -4.56289 |
| H | 3.61382  | -1.00045 | -3.43704 |
| C | 2.74054  | 2.30177  | -2.93348 |
| H | 1.70758  | 2.10114  | -2.64689 |
| H | 3.10812  | 3.16573  | -2.37191 |
| H | 2.71924  | 2.59032  | -3.98819 |
| C | 4.96419  | 1.45016  | -3.48492 |
| H | 5.46023  | 2.28442  | -2.98285 |
| H | 5.66568  | 0.61664  | -3.52228 |
| H | 4.75021  | 1.74997  | -4.51416 |
| C | 6.89520  | -2.40063 | -1.02877 |
| H | 7.26734  | -1.80315 | -1.86519 |
| H | 7.63110  | -3.18441 | -0.83504 |

|    |          |          |          |
|----|----------|----------|----------|
| H  | 5.96748  | -2.88903 | -1.33784 |
| C  | 6.26305  | -2.49566 | 1.36723  |
| H  | 6.15115  | -1.96057 | 2.31199  |
| H  | 5.30425  | -2.96800 | 1.14205  |
| H  | 7.00794  | -3.28270 | 1.51348  |
| C  | 8.04542  | -0.91890 | 0.59428  |
| H  | 7.98191  | -0.34050 | 1.51813  |
| H  | 8.80540  | -1.69201 | 0.73715  |
| H  | 8.38608  | -0.24916 | -0.19936 |
| C  | -2.22260 | 1.35676  | 0.31007  |
| C  | -2.82677 | 0.75087  | 1.45228  |
| C  | -3.01931 | 2.18119  | -0.52670 |
| C  | -4.20843 | 0.65693  | 1.46366  |
| C  | -4.39931 | 2.04048  | -0.43855 |
| C  | -5.01802 | 1.19737  | 0.47196  |
| H  | -4.67427 | 0.13472  | 2.28956  |
| H  | -5.01219 | 2.62292  | -1.11244 |
| C  | -2.09946 | 0.34889  | 2.74996  |
| C  | -2.20158 | -1.14626 | 3.05707  |
| C  | -2.79271 | 1.12568  | 3.88849  |
| H  | -1.63779 | -1.74294 | 2.34090  |
| H  | -1.79465 | -1.34257 | 4.05269  |
| H  | -3.23760 | -1.49083 | 3.04310  |
| H  | -2.77830 | 2.20187  | 3.69892  |
| H  | -3.82901 | 0.82174  | 4.03704  |
| H  | -2.25671 | 0.93701  | 4.82213  |
| C  | -2.51744 | 3.36226  | -1.38030 |
| C  | -3.14406 | 4.61898  | -0.73988 |
| C  | -2.97649 | 3.28833  | -2.83873 |
| H  | -2.84862 | 4.71290  | 0.30787  |
| H  | -2.79517 | 5.50725  | -1.27357 |
| H  | -4.23333 | 4.60618  | -0.78337 |
| H  | -2.54454 | 2.43227  | -3.35586 |
| H  | -4.06250 | 3.21779  | -2.92031 |
| H  | -2.66591 | 4.19522  | -3.36459 |
| C  | -6.51628 | 0.93013  | 0.47430  |
| C  | -7.13898 | 1.51099  | 1.74977  |
| C  | -6.74458 | -0.58629 | 0.43841  |
| H  | -6.98942 | 2.59240  | 1.80502  |
| H  | -8.21452 | 1.31491  | 1.76131  |
| H  | -6.71062 | 1.06464  | 2.64943  |
| H  | -6.29451 | -1.03963 | -0.44718 |
| H  | -6.31475 | -1.08372 | 1.30964  |
| H  | -7.81704 | -0.79882 | 0.42809  |
| Cl | 2.09631  | -1.64996 | 2.04255  |
| O  | -0.81877 | -0.96411 | 0.10189  |
| Cl | -1.08189 | 0.40369  | -2.35430 |
| Au | -2.43141 | -2.24458 | -0.38147 |
| Cl | -4.11346 | -3.61938 | -0.88931 |
| C  | -1.01109 | 3.58617  | -1.32715 |
| H  | -0.64581 | 3.61626  | -0.29791 |
| H  | -0.44614 | 2.83950  | -1.88168 |
| H  | -0.77692 | 4.55285  | -1.77987 |
| C  | -0.64048 | 0.78628  | 2.78700  |
| H  | 0.00714  | 0.19730  | 2.14097  |
| H  | -0.53632 | 1.84520  | 2.53573  |
| H  | -0.25117 | 0.64594  | 3.79822  |
| C  | -7.21381 | 1.55247  | -0.73227 |
| H  | -7.15214 | 2.64412  | -0.72639 |
| H  | -6.79567 | 1.18544  | -1.67275 |
| H  | -8.27320 | 1.28693  | -0.71503 |
| Sn | 1.56005  | -1.41106 | -0.29431 |

**Coordination through P(sp<sup>2</sup>) atom****R = H**

|    |          |          |          |
|----|----------|----------|----------|
| P  | 0.61606  | 0.00599  | 0.92159  |
| C  | 0.37971  | -0.26051 | -0.67361 |
| P  | -1.10853 | -0.26698 | -1.56923 |
| Cl | 1.25717  | -2.76501 | -2.78383 |
| Sn | 1.55367  | -0.38915 | -2.69486 |
| O  | -0.67389 | -0.00820 | -2.99563 |
| Au | -0.71856 | 0.42027  | 2.61556  |
| Cl | -2.07960 | 0.83991  | 4.36269  |
| Cl | -2.48762 | 1.04382  | -0.95144 |
| H  | -1.79144 | -1.48340 | -1.41736 |
| H  | 2.01221  | -0.07699 | 1.11822  |

**R = Me**

|    |          |          |          |
|----|----------|----------|----------|
| P  | 0.71735  | 0.05040  | 0.87419  |
| C  | 0.41972  | -0.18975 | -0.71286 |
| P  | -1.12671 | -0.28768 | -1.51000 |
| Cl | 1.37422  | -2.81369 | -2.64303 |
| Sn | 1.46961  | -0.40826 | -2.77777 |
| O  | -0.75629 | -0.20560 | -2.98281 |
| C  | 2.49248  | 0.01494  | 1.21667  |
| H  | 2.69803  | -0.81769 | 1.89436  |
| H  | 3.07259  | -0.10093 | 0.30213  |
| H  | 2.77316  | 0.93640  | 1.73189  |
| C  | -2.04595 | -1.76246 | -1.10989 |
| H  | -2.31650 | -1.76124 | -0.05308 |
| H  | -2.94509 | -1.79736 | -1.72738 |
| H  | -1.40259 | -2.61516 | -1.33926 |
| Au | -0.68770 | 0.33804  | 2.54877  |
| Cl | -2.12832 | 0.59681  | 4.27079  |
| Cl | -2.35947 | 1.22834  | -1.01941 |

**R = t-Bu**

|    |          |          |          |
|----|----------|----------|----------|
| P  | 0.74285  | 0.11358  | 0.77398  |
| C  | 0.51468  | -0.37019 | -0.77289 |
| P  | -0.99398 | -0.56500 | -1.63897 |
| Cl | 2.11293  | -2.91488 | -2.59003 |
| Sn | 1.68497  | -0.55052 | -2.78451 |
| O  | -0.53204 | -0.70280 | -3.08482 |
| Au | -0.74787 | 0.71450  | 2.29772  |
| Cl | -2.26087 | 1.33794  | 3.86408  |
| C  | 2.51987  | 0.14121  | 1.29128  |
| C  | 2.80218  | 1.53687  | 1.85284  |
| C  | 2.64807  | -0.90220 | 2.40698  |
| C  | 3.46851  | -0.18278 | 0.14971  |
| H  | 2.72602  | 2.30785  | 1.08239  |
| H  | 2.11554  | 1.79439  | 2.66272  |
| H  | 3.81937  | 1.55878  | 2.25487  |
| H  | 2.47508  | -1.91465 | 2.03505  |
| H  | 3.66248  | -0.85948 | 2.81491  |
| H  | 1.95017  | -0.70922 | 3.22538  |
| H  | 4.49589  | -0.18053 | 0.52613  |
| H  | 3.27655  | -1.17129 | -0.27479 |
| H  | 3.41674  | 0.56881  | -0.64313 |
| C  | -2.08690 | -1.95366 | -1.15575 |
| C  | -1.24607 | -3.23020 | -1.23696 |
| C  | -2.63822 | -1.76783 | 0.25263  |
| C  | -3.22178 | -2.00825 | -2.18161 |
| H  | -0.84101 | -3.39270 | -2.23610 |
| H  | -0.41194 | -3.21853 | -0.53338 |
| H  | -1.89019 | -4.07713 | -0.98495 |
| H  | -3.22971 | -0.85672 | 0.35216  |
| H  | -3.28762 | -2.61692 | 0.48312  |

|    |          |          |          |
|----|----------|----------|----------|
| H  | -1.84672 | -1.74842 | 1.00451  |
| H  | -3.83455 | -2.88759 | -1.96531 |
| H  | -3.86449 | -1.12826 | -2.12561 |
| H  | -2.84045 | -2.10072 | -3.19981 |
| Cl | -2.13316 | 1.10135  | -1.45847 |

**R = Ph**

|    |          |          |          |
|----|----------|----------|----------|
| P  | 0.73638  | 0.19153  | 0.58064  |
| C  | 0.55600  | -0.47601 | -0.90235 |
| P  | -0.90957 | -0.74675 | -1.80121 |
| Cl | 1.99249  | -3.34448 | -2.23877 |
| Sn | 1.81379  | -0.99534 | -2.77088 |
| O  | -0.39568 | -1.07748 | -3.19367 |
| Au | -0.78631 | 1.09734  | 1.90145  |
| Cl | -2.38097 | 1.98721  | 3.23868  |
| C  | 2.44210  | 0.13175  | 1.10508  |
| C  | 2.87708  | 1.06935  | 2.04361  |
| C  | 3.33050  | -0.83138 | 0.61850  |
| C  | 4.19769  | 1.06947  | 2.45965  |
| H  | 2.17844  | 1.79905  | 2.43997  |
| C  | 4.64572  | -0.83070 | 1.04787  |
| H  | 2.98035  | -1.60581 | -0.05608 |
| C  | 5.08122  | 0.12318  | 1.95975  |
| H  | 4.53603  | 1.80513  | 3.17958  |
| H  | 5.33083  | -1.58512 | 0.67939  |
| H  | 6.11264  | 0.11875  | 2.29320  |
| C  | -1.95991 | -2.03095 | -1.14581 |
| C  | -2.84440 | -1.78977 | -0.09529 |
| C  | -1.82300 | -3.31200 | -1.67728 |
| C  | -3.59272 | -2.83378 | 0.41863  |
| H  | -2.95538 | -0.79292 | 0.31631  |
| C  | -2.58126 | -4.34885 | -1.15696 |
| H  | -1.12662 | -3.49087 | -2.48729 |
| C  | -3.46183 | -4.11075 | -0.11249 |
| H  | -4.28196 | -2.64858 | 1.23377  |
| H  | -2.48046 | -5.34554 | -1.56979 |
| H  | -4.05241 | -4.92495 | 0.29187  |
| Cl | -2.06494 | 0.90734  | -1.85400 |

**R = Mes**

|    |          |          |          |
|----|----------|----------|----------|
| P  | 0.66149  | 0.34741  | 1.16106  |
| C  | 0.31775  | -0.43175 | -0.23455 |
| P  | -1.06364 | -0.60503 | -1.28400 |
| Cl | 1.72198  | -3.08022 | -2.00214 |
| Sn | 1.75714  | -0.66311 | -2.01735 |
| O  | -0.40207 | -0.45719 | -2.64717 |
| Au | -0.61538 | 1.38413  | 2.63821  |
| Cl | -1.89376 | 2.45039  | 4.17309  |
| C  | 2.44656  | 0.29454  | 1.40782  |
| C  | 3.18496  | 1.48280  | 1.27626  |
| C  | 3.07475  | -0.91314 | 1.75457  |
| C  | 4.55755  | 1.43250  | 1.47126  |
| C  | 4.45083  | -0.90441 | 1.94521  |
| C  | 5.20918  | 0.25141  | 1.80746  |
| H  | 5.13467  | 2.34512  | 1.35763  |
| H  | 4.94379  | -1.83323 | 2.21532  |
| C  | -2.01293 | -2.11601 | -1.09680 |
| C  | -2.51057 | -2.47058 | 0.17443  |
| C  | -2.27142 | -2.94062 | -2.21591 |
| C  | -3.22325 | -3.65256 | 0.31054  |
| C  | -2.99210 | -4.11029 | -2.00898 |
| C  | -3.46626 | -4.49477 | -0.76370 |
| H  | -3.60691 | -3.91454 | 1.29155  |
| H  | -3.19584 | -4.74194 | -2.86768 |
| Cl | -2.39378 | 0.91583  | -1.07225 |
| C  | 2.52773  | 2.78200  | 0.91836  |

|   |          |          |          |
|---|----------|----------|----------|
| H | 2.00779  | 2.72306  | -0.04258 |
| H | 1.78500  | 3.07464  | 1.66727  |
| H | 3.26459  | 3.58233  | 0.84840  |
| C | 2.31192  | -2.19191 | 1.93519  |
| H | 1.42115  | -2.04482 | 2.55319  |
| H | 1.97918  | -2.60368 | 0.97833  |
| H | 2.93551  | -2.94093 | 2.42395  |
| C | 6.68668  | 0.23357  | 2.04832  |
| H | 6.90886  | 0.48305  | 3.09059  |
| H | 7.11118  | -0.75165 | 1.84955  |
| H | 7.20111  | 0.96430  | 1.42188  |
| C | -2.30832 | -1.64289 | 1.40589  |
| H | -3.02458 | -1.93162 | 2.17527  |
| H | -1.30725 | -1.79194 | 1.81886  |
| H | -2.43444 | -0.57395 | 1.22954  |
| C | -1.83994 | -2.65445 | -3.62485 |
| H | -2.11953 | -1.65424 | -3.95385 |
| H | -0.75662 | -2.73344 | -3.72832 |
| H | -2.30062 | -3.38046 | -4.29518 |
| C | -4.20752 | -5.78175 | -0.58480 |
| H | -4.76060 | -6.05190 | -1.48582 |
| H | -3.50902 | -6.59739 | -0.37290 |
| H | -4.90842 | -5.72602 | 0.24962  |

**R = Mes\***

|    |          |          |          |
|----|----------|----------|----------|
| P  | -1.05258 | 0.96593  | 0.06589  |
| C  | -0.26220 | -0.42349 | 0.41998  |
| P  | 1.36296  | -1.05293 | 0.55902  |
| Cl | -1.63010 | -2.92839 | -1.83415 |
| O  | 1.16105  | -2.47781 | 0.05881  |
| C  | 3.00951  | -0.48049 | 0.05086  |
| C  | 3.55242  | -1.14377 | -1.08942 |
| C  | 3.89320  | 0.16130  | 0.95820  |
| C  | 4.90260  | -1.45535 | -1.06119 |
| C  | 5.23803  | -0.19183 | 0.90169  |
| C  | 5.75440  | -1.07240 | -0.03360 |
| H  | 5.30899  | -2.01849 | -1.89117 |
| H  | 5.90682  | 0.25648  | 1.62246  |
| C  | -2.82099 | 0.52957  | 0.11808  |
| C  | -3.54566 | 0.30016  | -1.08116 |
| C  | -3.37458 | 0.15008  | 1.36638  |
| C  | -4.67312 | -0.51103 | -1.00137 |
| C  | -4.48918 | -0.68219 | 1.34900  |
| C  | -5.12419 | -1.07580 | 0.18211  |
| H  | -5.20657 | -0.73463 | -1.91005 |
| H  | -4.88430 | -1.02721 | 2.29587  |
| C  | -3.22239 | 0.96323  | -2.43391 |
| C  | -2.94108 | 0.65320  | 2.76099  |
| C  | -6.29258 | -2.05432 | 0.23840  |
| C  | 3.57281  | 1.35199  | 1.88454  |
| C  | 2.82231  | -1.42524 | -2.41740 |
| C  | 7.20254  | -1.54518 | -0.01943 |
| C  | -4.19329 | 1.20844  | 3.46612  |
| H  | -3.90740 | 1.61811  | 4.43810  |
| H  | -4.64817 | 2.01058  | 2.88015  |
| H  | -4.95409 | 0.44881  | 3.64420  |
| C  | -1.94156 | 1.80782  | 2.74994  |
| H  | -0.93065 | 1.50047  | 2.47849  |
| H  | -2.25576 | 2.62017  | 2.08964  |
| H  | -1.86789 | 2.22145  | 3.75935  |
| C  | -2.36469 | -0.48872 | 3.60252  |
| H  | -3.06213 | -1.32556 | 3.67959  |
| H  | -1.43069 | -0.86076 | 3.17648  |
| H  | -2.15159 | -0.13593 | 4.61559  |
| C  | -7.41788 | -1.46700 | 1.09819  |
| H  | -8.25810 | -2.16522 | 1.14364  |

|    |          |          |          |
|----|----------|----------|----------|
| H  | -7.09109 | -1.27453 | 2.12213  |
| H  | -7.78062 | -0.52546 | 0.67863  |
| C  | -6.85680 | -2.36418 | -1.14559 |
| H  | -7.67100 | -3.08663 | -1.05189 |
| H  | -7.26392 | -1.47284 | -1.62970 |
| H  | -6.10088 | -2.80043 | -1.80295 |
| C  | -5.80596 | -3.36772 | 0.86313  |
| H  | -5.00955 | -3.81357 | 0.26217  |
| H  | -5.42167 | -3.21768 | 1.87435  |
| H  | -6.62992 | -4.08413 | 0.92179  |
| C  | -4.21080 | 0.54786  | -3.52795 |
| H  | -5.24122 | 0.81277  | -3.28057 |
| H  | -3.95132 | 1.07947  | -4.44584 |
| H  | -4.16163 | -0.52240 | -3.74261 |
| C  | -3.36450 | 2.48188  | -2.26298 |
| H  | -4.37782 | 2.74175  | -1.94654 |
| H  | -2.66923 | 2.88399  | -1.52285 |
| H  | -3.16157 | 2.98648  | -3.21120 |
| C  | -1.83277 | 0.61423  | -2.97168 |
| H  | -1.01990 | 1.02533  | -2.36964 |
| H  | -1.69394 | -0.46514 | -3.03955 |
| H  | -1.71415 | 1.04842  | -3.96834 |
| C  | 2.13080  | 1.83587  | 1.83172  |
| H  | 1.80538  | 1.97794  | 0.79845  |
| H  | 1.43106  | 1.17739  | 2.34111  |
| H  | 2.06175  | 2.81194  | 2.31710  |
| C  | 4.41469  | 2.52837  | 1.34471  |
| H  | 4.21260  | 3.41915  | 1.94489  |
| H  | 5.48559  | 2.32815  | 1.38786  |
| H  | 4.15095  | 2.75517  | 0.30928  |
| C  | 3.97504  | 1.09676  | 3.33991  |
| H  | 5.03616  | 0.85992  | 3.43678  |
| H  | 3.78560  | 1.99708  | 3.93034  |
| H  | 3.40461  | 0.27807  | 3.77821  |
| C  | 1.46069  | -0.74541 | -2.52874 |
| H  | 1.12740  | -0.78831 | -3.56833 |
| H  | 0.68418  | -1.23831 | -1.94922 |
| H  | 1.51656  | 0.31007  | -2.24736 |
| C  | 2.68275  | -2.92583 | -2.68654 |
| H  | 2.05976  | -3.40308 | -1.93201 |
| H  | 2.22129  | -3.08227 | -3.66525 |
| H  | 3.65808  | -3.41871 | -2.69483 |
| C  | 3.67912  | -0.80171 | -3.53830 |
| H  | 3.82834  | 0.26806  | -3.37276 |
| H  | 4.65867  | -1.26935 | -3.63855 |
| H  | 3.15823  | -0.92780 | -4.49064 |
| C  | 7.96819  | -1.02941 | 1.19607  |
| H  | 8.04938  | 0.06052  | 1.19625  |
| H  | 7.49930  | -1.34117 | 2.13274  |
| H  | 8.98377  | -1.43183 | 1.18370  |
| C  | 7.91797  | -1.05644 | -1.28462 |
| H  | 7.44900  | -1.44152 | -2.19212 |
| H  | 7.91364  | 0.03477  | -1.34092 |
| H  | 8.95832  | -1.39288 | -1.27921 |
| C  | 7.21965  | -3.07829 | 0.01420  |
| H  | 6.72502  | -3.45568 | 0.91238  |
| H  | 6.71286  | -3.50801 | -0.85206 |
| H  | 8.25088  | -3.44165 | 0.01405  |
| Sn | -1.06475 | -2.62689 | 0.49718  |
| Cl | 1.55488  | -1.31339 | 2.59373  |
| Au | -0.25924 | 2.98585  | -0.43257 |
| Cl | 0.56173  | 5.04523  | -0.92293 |



**Coordination through  $\pi(\text{C}=\text{P})$  bond****R = H**

|    |          |          |          |
|----|----------|----------|----------|
| P  | 0.69397  | -0.02751 | 1.07102  |
| C  | 0.47796  | 0.04697  | -0.63785 |
| P  | -1.00172 | -0.24869 | -1.52209 |
| Cl | 1.47464  | -2.66822 | -2.40019 |
| Sn | 1.63533  | -0.28173 | -2.67063 |
| O  | -0.61580 | -0.07585 | -2.97531 |
| Au | 0.74848  | 2.08686  | -0.02707 |
| Cl | 1.02455  | 4.31507  | 0.01631  |
| Cl | -2.58743 | 0.88055  | -1.04029 |
| H  | 2.11621  | -0.16629 | 1.08513  |
| H  | -1.48220 | -1.53593 | -1.23468 |

**R = Me**

|    |          |          |          |
|----|----------|----------|----------|
| P  | 0.63132  | 0.01059  | 1.00086  |
| C  | 0.43175  | 0.14156  | -0.70334 |
| P  | -1.03011 | -0.22644 | -1.60487 |
| Cl | 1.74440  | -2.60194 | -2.23182 |
| Sn | 1.65097  | -0.22086 | -2.67821 |
| O  | -0.56620 | -0.21919 | -3.05275 |
| C  | 2.42910  | -0.27293 | 1.22622  |
| H  | 2.56855  | -1.35621 | 1.30950  |
| H  | 3.04038  | 0.10072  | 0.40534  |
| H  | 2.75041  | 0.18070  | 2.16590  |
| C  | -1.75075 | -1.78916 | -1.12842 |
| H  | -2.10733 | -1.74287 | -0.09872 |
| H  | -2.57878 | -2.01325 | -1.80275 |
| H  | -0.97271 | -2.54935 | -1.23163 |
| Au | 0.62328  | 2.16909  | -0.02732 |
| Cl | 0.84419  | 4.39989  | 0.17251  |
| Cl | -2.52741 | 1.10562  | -1.36145 |

**R = *t*-Bu**

|    |          |          |          |
|----|----------|----------|----------|
| P  | 1.13023  | 0.07913  | 1.17828  |
| C  | 0.66672  | 0.11867  | -0.48372 |
| P  | -0.92296 | -0.36361 | -1.10381 |
| Cl | 2.19884  | -2.60501 | -2.07320 |
| Sn | 1.57647  | -0.32537 | -2.61341 |
| O  | -0.61779 | -0.77310 | -2.53743 |
| Au | 0.81340  | 2.18518  | 0.10373  |
| Cl | 0.93769  | 4.43173  | 0.25829  |
| C  | 2.99177  | -0.04797 | 1.30594  |
| C  | 3.79307  | 0.30031  | 0.06506  |
| C  | 3.37992  | 0.86717  | 2.46954  |
| C  | 3.22857  | -1.51304 | 1.69642  |
| H  | 3.62915  | -0.42732 | -0.73376 |
| H  | 3.57080  | 1.30572  | -0.30079 |
| H  | 4.86198  | 0.26418  | 0.30055  |
| H  | 2.78426  | 0.66273  | 3.36378  |
| H  | 4.43103  | 0.70251  | 2.72529  |
| H  | 3.25457  | 1.92177  | 2.21277  |
| H  | 4.28963  | -1.65408 | 1.92575  |
| H  | 2.66020  | -1.79483 | 2.58758  |
| H  | 2.96666  | -2.19333 | 0.88240  |
| C  | -1.85930 | -1.67130 | -0.22343 |
| C  | -0.92492 | -2.87438 | -0.06865 |
| C  | -2.33568 | -1.18132 | 1.14096  |
| C  | -3.04771 | -2.04973 | -1.11068 |
| H  | -0.51756 | -3.20709 | -1.02426 |
| H  | -0.08989 | -2.66204 | 0.60107  |
| H  | -1.49971 | -3.69734 | 0.36505  |
| H  | -3.03827 | -0.35159 | 1.05383  |
| H  | -2.84845 | -2.00622 | 1.64363  |

|    |          |          |          |
|----|----------|----------|----------|
| H  | -1.50585 | -0.86941 | 1.77916  |
| H  | -3.58970 | -2.86684 | -0.62654 |
| H  | -3.74105 | -1.21710 | -1.24111 |
| H  | -2.72156 | -2.39026 | -2.09441 |
| Cl | -2.18213 | 1.22987  | -1.15035 |

**R = Ph**

|    |          |          |          |
|----|----------|----------|----------|
| P  | 0.57416  | 0.20074  | 0.95516  |
| C  | 0.34351  | 0.18360  | -0.74945 |
| P  | -1.15730 | -0.13157 | -1.59978 |
| Cl | 1.76069  | -2.21800 | -2.99602 |
| Sn | 1.45054  | 0.17936  | -2.83226 |
| O  | -0.78976 | 0.05514  | -3.06256 |
| Au | 0.60696  | 2.27501  | -0.24636 |
| Cl | 0.89143  | 4.50956  | -0.25203 |
| C  | 2.34689  | -0.08358 | 1.20202  |
| C  | 2.92111  | 0.46171  | 2.35310  |
| C  | 3.12229  | -0.88193 | 0.35974  |
| C  | 4.26167  | 0.25418  | 2.62942  |
| H  | 2.31734  | 1.06416  | 3.02475  |
| C  | 4.45876  | -1.10189 | 0.65110  |
| H  | 2.67421  | -1.36134 | -0.50418 |
| C  | 5.03129  | -0.52670 | 1.77761  |
| H  | 4.70620  | 0.69734  | 3.51289  |
| H  | 5.05350  | -1.72937 | -0.00273 |
| H  | 6.07867  | -0.69711 | 1.99905  |
| C  | -1.81481 | -1.75939 | -1.26937 |
| C  | -1.76780 | -2.71449 | -2.28018 |
| C  | -2.34436 | -2.07690 | -0.01925 |
| C  | -2.25716 | -3.98906 | -2.03672 |
| H  | -1.34489 | -2.45921 | -3.24334 |
| C  | -2.82557 | -3.35192 | 0.21510  |
| H  | -2.38653 | -1.32949 | 0.76570  |
| C  | -2.78244 | -4.30662 | -0.79422 |
| H  | -2.22191 | -4.73537 | -2.82136 |
| H  | -3.23850 | -3.60256 | 1.18502  |
| H  | -3.16194 | -5.30473 | -0.60735 |
| Cl | -2.65942 | 1.12736  | -1.09779 |

**R = Mes**

|    |          |          |          |
|----|----------|----------|----------|
| P  | 0.57337  | 0.26309  | 1.36475  |
| C  | 0.20753  | 0.16312  | -0.31739 |
| P  | -1.23925 | -0.11515 | -1.28119 |
| Cl | 1.79414  | -1.81933 | -2.94948 |
| Sn | 1.42561  | 0.49403  | -2.31007 |
| O  | -0.79184 | 0.38995  | -2.64571 |
| Au | 0.26939  | 2.29793  | 0.13672  |
| Cl | 0.28085  | 4.55574  | 0.07556  |
| C  | 2.38418  | 0.03678  | 1.43857  |
| C  | 3.21048  | 1.02540  | 1.99836  |
| C  | 2.92120  | -1.21997 | 1.09442  |
| C  | 4.57549  | 0.78116  | 2.09404  |
| C  | 4.29001  | -1.41342 | 1.21566  |
| C  | 5.13985  | -0.41902 | 1.68648  |
| H  | 5.21341  | 1.55327  | 2.51403  |
| H  | 4.70201  | -2.38305 | 0.95219  |
| C  | -1.83820 | -1.81018 | -1.28870 |
| C  | -2.01022 | -2.50461 | -2.51036 |
| C  | -2.16074 | -2.43979 | -0.06918 |
| C  | -2.42599 | -3.82832 | -2.45295 |
| C  | -2.57365 | -3.76512 | -0.08433 |
| C  | -2.69274 | -4.48652 | -1.26086 |
| H  | -2.55873 | -4.36112 | -3.38911 |
| H  | -2.82312 | -4.23941 | 0.85993  |
| Cl | -2.85426 | 1.01088  | -0.74438 |
| C  | 2.67679  | 2.33263  | 2.50227  |

|   |          |          |          |
|---|----------|----------|----------|
| H | 2.56988  | 3.06966  | 1.70071  |
| H | 1.69278  | 2.22387  | 2.96733  |
| H | 3.35175  | 2.75569  | 3.24797  |
| C | 2.06189  | -2.37789 | 0.67645  |
| H | 1.19879  | -2.49590 | 1.33909  |
| H | 1.68335  | -2.27346 | -0.34198 |
| H | 2.63540  | -3.30451 | 0.71947  |
| C | 6.61784  | -0.64444 | 1.76276  |
| H | 6.85074  | -1.68184 | 2.01046  |
| H | 7.09032  | -0.42656 | 0.79976  |
| H | 7.08229  | 0.00156  | 2.50945  |
| C | -2.10306 | -1.76787 | 1.26983  |
| H | -1.13165 | -1.91932 | 1.74890  |
| H | -2.28258 | -0.69476 | 1.23007  |
| H | -2.85569 | -2.20097 | 1.93058  |
| C | -1.81072 | -1.92013 | -3.87835 |
| H | -2.33242 | -0.97228 | -4.00531 |
| H | -0.75506 | -1.73576 | -4.08085 |
| H | -2.18312 | -2.62266 | -4.62438 |
| C | -3.10097 | -5.92563 | -1.25148 |
| H | -3.72388 | -6.16822 | -2.11435 |
| H | -2.21904 | -6.57229 | -1.29531 |
| H | -3.65088 | -6.17960 | -0.34412 |

**R = Mes\***

|    |          |          |          |
|----|----------|----------|----------|
| P  | 0.67193  | 0.05456  | 1.16098  |
| C  | 0.38782  | 0.09700  | -0.55450 |
| P  | -1.04930 | -0.16312 | -1.61903 |
| O  | -0.37797 | -0.08056 | -2.98369 |
| Cl | 2.81815  | -1.30318 | -3.25930 |
| Au | 0.34005  | 2.18661  | 0.06258  |
| Cl | 0.13903  | 4.44846  | 0.12150  |
| C  | 2.52115  | -0.03001 | 1.25402  |
| C  | 3.20877  | -1.16764 | 0.74675  |
| C  | 3.28571  | 1.08827  | 1.66626  |
| C  | 4.51569  | -1.00057 | 0.31533  |
| C  | 4.59406  | 1.18881  | 1.18713  |
| C  | 5.20459  | 0.20206  | 0.43410  |
| H  | 5.02652  | -1.85249 | -0.11378 |
| H  | 5.15619  | 2.07719  | 1.43832  |
| C  | 2.91146  | 2.11602  | 2.75549  |
| C  | 2.72999  | -2.62457 | 0.90403  |
| C  | 6.59366  | 0.35585  | -0.17427 |
| C  | 3.88645  | 1.84313  | 3.91994  |
| H  | 3.77410  | 0.82225  | 4.29418  |
| H  | 4.92714  | 1.97953  | 3.62384  |
| H  | 3.67504  | 2.53367  | 4.74096  |
| C  | 3.10375  | 3.56180  | 2.29043  |
| H  | 2.43884  | 3.81596  | 1.46454  |
| H  | 2.87940  | 4.24282  | 3.11598  |
| H  | 4.13012  | 3.75910  | 1.97661  |
| C  | 1.51444  | 1.97496  | 3.35225  |
| H  | 1.44248  | 2.62257  | 4.23022  |
| H  | 0.72152  | 2.29192  | 2.67247  |
| H  | 1.30969  | 0.95365  | 3.68333  |
| C  | 3.05906  | -3.49498 | -0.31116 |
| H  | 2.63636  | -3.08439 | -1.22671 |
| H  | 4.13403  | -3.60512 | -0.46154 |
| H  | 2.65533  | -4.49950 | -0.15769 |
| C  | 3.50877  | -3.17033 | 2.11687  |
| H  | 4.58622  | -3.12406 | 1.95001  |
| H  | 3.28289  | -2.59737 | 3.01987  |
| H  | 3.23356  | -4.21425 | 2.29482  |
| C  | 1.25178  | -2.80232 | 1.22936  |
| H  | 0.95426  | -2.24451 | 2.12381  |
| H  | 0.60225  | -2.52404 | 0.40073  |

|    |          |          |          |
|----|----------|----------|----------|
| H  | 1.06141  | -3.85723 | 1.44696  |
| C  | 7.20054  | 1.72734  | 0.10852  |
| H  | 6.57553  | 2.53526  | -0.27982 |
| H  | 7.35458  | 1.89391  | 1.17795  |
| H  | 8.17587  | 1.80111  | -0.37839 |
| C  | 6.48383  | 0.17857  | -1.69349 |
| H  | 7.47315  | 0.25306  | -2.15379 |
| H  | 6.05609  | -0.78964 | -1.96017 |
| H  | 5.84690  | 0.95073  | -2.13196 |
| C  | 7.53551  | -0.71202 | 0.39436  |
| H  | 7.62053  | -0.62193 | 1.48027  |
| H  | 7.19261  | -1.72280 | 0.16530  |
| H  | 8.53419  | -0.59693 | -0.03584 |
| C  | -2.35079 | -1.45978 | -1.66513 |
| C  | -2.32345 | -2.35220 | -2.78074 |
| C  | -3.58777 | -1.26171 | -0.99346 |
| C  | -3.53420 | -2.66407 | -3.37991 |
| C  | -1.10124 | -3.13171 | -3.30186 |
| C  | -4.75498 | -1.64704 | -1.64453 |
| C  | -3.78950 | -0.80781 | 0.46406  |
| C  | -4.76520 | -2.25457 | -2.88750 |
| H  | -3.51011 | -3.27847 | -4.26998 |
| C  | -0.61161 | -2.62921 | -4.66295 |
| C  | -1.51731 | -4.60705 | -3.47981 |
| C  | 0.02168  | -3.17104 | -2.27397 |
| H  | -5.69519 | -1.45402 | -1.14810 |
| C  | -2.50507 | -0.46302 | 1.19511  |
| C  | -4.38319 | -2.02591 | 1.20044  |
| C  | -4.76592 | 0.36497  | 0.59533  |
| C  | -6.04338 | -2.55668 | -3.65841 |
| H  | 0.19840  | -3.27063 | -5.01979 |
| H  | -1.42043 | -2.66914 | -5.39757 |
| H  | -0.24395 | -1.60874 | -4.61131 |
| H  | -2.19724 | -4.76192 | -4.31812 |
| H  | -0.62052 | -5.19756 | -3.68336 |
| H  | -1.98807 | -5.00392 | -2.57721 |
| H  | 0.45161  | -2.19781 | -2.05010 |
| H  | -0.33048 | -3.62827 | -1.34593 |
| H  | 0.84503  | -3.77611 | -2.65764 |
| H  | -1.76653 | -1.26188 | 1.10197  |
| H  | -2.06709 | 0.47597  | 0.85821  |
| H  | -2.71154 | -0.33970 | 2.26078  |
| H  | -4.52048 | -1.77743 | 2.25633  |
| H  | -5.35106 | -2.32366 | 0.79577  |
| H  | -3.71199 | -2.88596 | 1.13722  |
| H  | -5.74569 | 0.13768  | 0.17220  |
| H  | -4.91243 | 0.59617  | 1.65373  |
| H  | -4.38375 | 1.26018  | 0.10512  |
| C  | -7.28358 | -2.00410 | -2.96121 |
| C  | -6.20810 | -4.07377 | -3.80949 |
| C  | -5.94370 | -1.91514 | -5.04771 |
| H  | -7.44874 | -2.47279 | -1.98769 |
| H  | -7.21959 | -0.92263 | -2.81767 |
| H  | -8.16552 | -2.20570 | -3.57358 |
| H  | -5.37285 | -4.52168 | -4.35126 |
| H  | -6.27514 | -4.55988 | -2.83308 |
| H  | -7.12346 | -4.29711 | -4.36425 |
| H  | -5.83537 | -0.83068 | -4.97126 |
| H  | -5.08964 | -2.29760 | -5.61001 |
| H  | -6.84772 | -2.12818 | -5.62456 |
| Sn | 1.67250  | 0.67991  | -2.46257 |
| Cl | -2.24781 | 1.50642  | -1.58847 |

**[R-P=C(Sn(II)Cl)-P(O)MeR](AuCl)****Coordination through Sn(II) atom****R= H**

|    |          |          |          |
|----|----------|----------|----------|
| P  | 0.65446  | -0.14382 | 1.17454  |
| C  | 0.47593  | -0.20530 | -0.47064 |
| P  | -1.01756 | -0.16496 | -1.40760 |
| Cl | 1.76443  | -2.41087 | -2.78958 |
| Sn | 1.65541  | -0.10640 | -2.35730 |
| O  | -0.47610 | 0.11022  | -2.81659 |
| C  | -2.23516 | 1.03212  | -0.88074 |
| H  | -3.08401 | 1.01254  | -1.56703 |
| H  | -2.57463 | 0.78647  | 0.12833  |
| H  | -1.78500 | 2.02576  | -0.88501 |
| Au | 3.25669  | 1.63528  | -3.17177 |
| Cl | 4.68257  | 3.26666  | -3.84512 |
| H  | 2.08186  | -0.13059 | 1.23462  |
| H  | -1.67422 | -1.41047 | -1.34120 |

**R = Me**

|    |          |          |          |
|----|----------|----------|----------|
| P  | 0.65746  | -0.15984 | 1.16105  |
| C  | 0.47511  | -0.21955 | -0.48006 |
| P  | -1.03181 | -0.21589 | -1.39842 |
| Cl | 1.80175  | -2.39494 | -2.83167 |
| Sn | 1.61996  | -0.08715 | -2.37299 |
| O  | -0.49323 | 0.07479  | -2.81544 |
| C  | 2.46731  | -0.14092 | 1.44266  |
| H  | 2.76809  | -1.13107 | 1.79975  |
| H  | 3.03978  | 0.10830  | 0.54873  |
| H  | 2.69752  | 0.57137  | 2.23851  |
| C  | -1.86431 | -1.80088 | -1.33394 |
| H  | -2.21805 | -2.00261 | -0.32105 |
| H  | -2.70851 | -1.79799 | -2.02672 |
| H  | -1.15257 | -2.57164 | -1.63445 |
| C  | -2.20348 | 1.03763  | -0.88161 |
| H  | -3.06804 | 1.02806  | -1.54848 |
| H  | -2.52898 | 0.84500  | 0.14277  |
| H  | -1.72103 | 2.01435  | -0.93077 |
| Au | 3.22109  | 1.65188  | -3.19917 |
| Cl | 4.66369  | 3.27848  | -3.85908 |

**R = t-Bu**

|    |          |          |          |
|----|----------|----------|----------|
| P  | 0.69434  | -0.58428 | 0.94224  |
| C  | 0.64333  | -0.20450 | -0.66631 |
| P  | -0.81345 | -0.15698 | -1.67744 |
| Cl | 2.72437  | -1.45161 | -3.24688 |
| Sn | 1.84542  | 0.55528  | -2.37253 |
| O  | -0.20350 | 0.31816  | -3.01751 |
| Au | 2.90425  | 2.80365  | -2.70643 |
| Cl | 3.81778  | 4.87759  | -2.90795 |
| C  | 2.45643  | -0.45577 | 1.55123  |
| C  | 2.79761  | -1.85446 | 2.07628  |
| C  | 3.47711  | -0.01271 | 0.52190  |
| C  | 2.40828  | 0.53274  | 2.72072  |
| H  | 2.06012  | -2.20843 | 2.80214  |
| H  | 2.85813  | -2.58521 | 1.26603  |
| H  | 3.77028  | -1.82685 | 2.57772  |
| H  | 3.27251  | 0.99556  | 0.15055  |
| H  | 4.47289  | 0.01636  | 0.97630  |
| H  | 3.53335  | -0.70796 | -0.32099 |
| H  | 3.38246  | 0.55497  | 3.21920  |
| H  | 2.18207  | 1.54712  | 2.38309  |
| H  | 1.66040  | 0.24595  | 3.46529  |
| C  | -1.68487 | -1.75481 | -1.89573 |
| C  | -2.72038 | -1.56673 | -3.00797 |
| C  | -0.66012 | -2.80717 | -2.31861 |

|   |          |          |          |
|---|----------|----------|----------|
| C | -2.36250 | -2.16636 | -0.59049 |
| H | -3.50609 | -0.86116 | -2.72869 |
| H | -2.25575 | -1.22289 | -3.93378 |
| H | -3.20032 | -2.52923 | -3.20607 |
| H | 0.08881  | -2.98007 | -1.54405 |
| H | -1.18266 | -3.75011 | -2.50235 |
| H | -0.13909 | -2.52267 | -3.23387 |
| H | -2.81874 | -3.15097 | -0.72567 |
| H | -1.65083 | -2.24345 | 0.23561  |
| H | -3.15627 | -1.47466 | -0.30024 |
| C | -1.98052 | 1.06381  | -1.06078 |
| H | -2.82229 | 1.16703  | -1.74700 |
| H | -2.33928 | 0.78619  | -0.06881 |
| H | -1.45795 | 2.01941  | -0.99581 |

**R = Ph**

|    |          |          |          |
|----|----------|----------|----------|
| P  | 0.78674  | -0.03528 | 1.22748  |
| C  | 0.45782  | -0.31907 | -0.37091 |
| P  | -1.11828 | -0.37093 | -1.15832 |
| Cl | 1.75182  | -2.58094 | -2.74963 |
| Sn | 1.45665  | -0.27330 | -2.33896 |
| O  | -0.69927 | -0.23298 | -2.63590 |
| Au | 2.86257  | 1.49778  | -3.41843 |
| Cl | 4.12765  | 3.14607  | -4.34320 |
| C  | 2.58759  | -0.06714 | 1.35154  |
| C  | 3.16308  | 0.73522  | 2.33977  |
| C  | 3.41423  | -0.85316 | 0.54390  |
| C  | 4.54013  | 0.79534  | 2.47937  |
| H  | 2.52675  | 1.32789  | 2.98977  |
| C  | 4.78873  | -0.80171 | 0.69578  |
| H  | 2.97992  | -1.53967 | -0.17639 |
| C  | 5.35252  | 0.03044  | 1.65505  |
| H  | 4.98007  | 1.43746  | 3.23343  |
| H  | 5.42316  | -1.41569 | 0.06731  |
| H  | 6.42978  | 0.07301  | 1.76657  |
| C  | -1.99334 | -1.91204 | -0.88818 |
| C  | -2.12550 | -2.80645 | -1.94613 |
| C  | -2.52280 | -2.22420 | 0.36346  |
| C  | -2.79585 | -4.00500 | -1.75187 |
| H  | -1.69923 | -2.56088 | -2.91127 |
| C  | -3.18912 | -3.42251 | 0.55006  |
| H  | -2.40597 | -1.54171 | 1.19932  |
| C  | -3.32701 | -4.31151 | -0.50868 |
| H  | -2.89795 | -4.70222 | -2.57503 |
| H  | -3.59899 | -3.66653 | 1.52307  |
| H  | -3.84802 | -5.25029 | -0.35961 |
| C  | -2.20820 | 0.96394  | -0.66183 |
| H  | -3.12015 | 0.92489  | -1.26022 |
| H  | -2.46277 | 0.87119  | 0.39565  |
| H  | -1.69744 | 1.91333  | -0.82831 |

**R = Mes**

|    |          |          |          |
|----|----------|----------|----------|
| P  | 0.91646  | -0.38600 | 1.79074  |
| C  | 0.37052  | -0.45591 | 0.22755  |
| P  | -1.20876 | -0.36953 | -0.57327 |
| Cl | 1.68233  | -1.99301 | -2.66779 |
| Sn | 1.40202  | 0.11151  | -1.62376 |
| O  | -0.74800 | 0.24731  | -1.91270 |
| Au | 2.85711  | 2.09337  | -2.12014 |
| Cl | 4.18757  | 3.91710  | -2.43365 |
| C  | 2.71250  | -0.17991 | 1.53551  |
| C  | 3.27426  | 1.09837  | 1.68114  |
| C  | 3.52140  | -1.28428 | 1.22944  |
| C  | 4.63573  | 1.25833  | 1.46946  |
| C  | 4.88156  | -1.07418 | 1.03256  |
| C  | 5.45529  | 0.18697  | 1.13268  |

|   |          |          |          |
|---|----------|----------|----------|
| H | 5.06561  | 2.25166  | 1.55559  |
| H | 5.51170  | -1.92597 | 0.79451  |
| C | -2.04809 | -1.95524 | -0.77946 |
| C | -2.47837 | -2.39489 | -2.05230 |
| C | -2.30689 | -2.74459 | 0.35792  |
| C | -3.13573 | -3.61584 | -2.13666 |
| C | -2.97314 | -3.95390 | 0.20752  |
| C | -3.38819 | -4.41545 | -1.03088 |
| H | -3.46988 | -3.94926 | -3.11413 |
| H | -3.17213 | -4.55001 | 1.09295  |
| C | -2.36415 | 0.78226  | 0.18689  |
| H | -3.19446 | 0.92912  | -0.50725 |
| H | -2.75395 | 0.41319  | 1.13471  |
| H | -1.85238 | 1.73313  | 0.34283  |
| C | -1.87453 | -2.37985 | 1.74760  |
| H | -0.86074 | -2.73979 | 1.94391  |
| H | -1.86915 | -1.30923 | 1.94992  |
| H | -2.53488 | -2.84606 | 2.48014  |
| C | -2.28407 | -1.64059 | -3.33662 |
| H | -2.62856 | -0.60852 | -3.27666 |
| H | -1.23056 | -1.60244 | -3.61783 |
| H | -2.83296 | -2.14065 | -4.13495 |
| C | -4.07355 | -5.73746 | -1.17812 |
| H | -4.52454 | -6.06097 | -0.23895 |
| H | -4.85309 | -5.69833 | -1.94129 |
| H | -3.35833 | -6.50723 | -1.48397 |
| C | 2.95885  | -2.67128 | 1.11511  |
| H | 2.26613  | -2.89444 | 1.93280  |
| H | 2.40932  | -2.80917 | 0.17953  |
| H | 3.75793  | -3.41308 | 1.14328  |
| C | 2.42511  | 2.29024  | 2.00831  |
| H | 1.66182  | 2.05618  | 2.75798  |
| H | 3.03389  | 3.10956  | 2.39191  |
| H | 1.90761  | 2.65953  | 1.11684  |
| C | 6.91401  | 0.39893  | 0.87135  |
| H | 7.05899  | 0.93634  | -0.07031 |
| H | 7.37473  | 0.99941  | 1.65913  |
| H | 7.44997  | -0.54863 | 0.80371  |

**R = Mes\***

|    |          |          |          |
|----|----------|----------|----------|
| P  | -0.19960 | 2.21884  | 1.16953  |
| C  | 0.28186  | 0.76791  | 0.52156  |
| P  | 1.81173  | -0.13567 | 0.35568  |
| Cl | -1.10312 | 0.28622  | -2.81771 |
| O  | 1.40774  | -1.01745 | -0.85605 |
| C  | 1.90953  | -1.31567 | 1.72301  |
| H  | 2.72595  | -2.00538 | 1.50130  |
| H  | 2.05729  | -0.87389 | 2.70275  |
| H  | 0.97113  | -1.87543 | 1.71959  |
| C  | 3.53281  | 0.43844  | 0.11986  |
| C  | 4.09907  | 0.30286  | -1.18111 |
| C  | 4.41380  | 0.48814  | 1.23289  |
| C  | 5.40413  | -0.16060 | -1.26819 |
| C  | 5.71858  | 0.03692  | 1.05788  |
| C  | 6.21172  | -0.39257 | -0.16306 |
| H  | 5.81245  | -0.33654 | -2.25475 |
| H  | 6.37452  | 0.03406  | 1.91725  |
| C  | -2.00808 | 2.15867  | 0.83741  |
| C  | -2.53714 | 2.89035  | -0.25015 |
| C  | -2.84010 | 1.26819  | 1.56285  |
| C  | -3.78001 | 2.50475  | -0.74688 |
| C  | -4.06054 | 0.92439  | 0.99368  |
| C  | -4.52549 | 1.47453  | -0.19413 |
| H  | -4.17378 | 3.01954  | -1.60846 |
| H  | -4.68411 | 0.20392  | 1.50460  |
| C  | -1.85204 | 4.13898  | -0.84075 |

|   |          |          |          |
|---|----------|----------|----------|
| C | -2.54384 | 0.76187  | 2.99331  |
| C | -5.83302 | 0.97911  | -0.80317 |
| C | 4.13647  | 1.17501  | 2.58623  |
| C | 3.45132  | 0.76075  | -2.50190 |
| C | 7.59815  | -1.00010 | -0.33555 |
| C | -3.85973 | 0.59006  | 3.76863  |
| H | -3.62898 | 0.39839  | 4.81923  |
| H | -4.48157 | 1.48655  | 3.71414  |
| H | -4.44529 | -0.25974 | 3.41519  |
| C | -1.72383 | 1.78287  | 3.78433  |
| H | -0.69933 | 1.89778  | 3.40998  |
| H | -2.19346 | 2.76926  | 3.77703  |
| H | -1.63018 | 1.45287  | 4.82241  |
| C | -1.82584 | -0.58997 | 3.01720  |
| H | -2.38068 | -1.34676 | 2.45783  |
| H | -0.82443 | -0.51738 | 2.59344  |
| H | -1.73106 | -0.93978 | 4.04952  |
| C | -6.97971 | 1.17974  | 0.19471  |
| H | -7.91872 | 0.82515  | -0.23892 |
| H | -6.81503 | 0.62702  | 1.12162  |
| H | -7.09926 | 2.23635  | 0.44807  |
| C | -6.18617 | 1.71616  | -2.09234 |
| H | -7.11285 | 1.30677  | -2.50131 |
| H | -6.34573 | 2.78454  | -1.92335 |
| H | -5.40958 | 1.59757  | -2.85197 |
| C | -5.69298 | -0.51387 | -1.12506 |
| H | -4.89293 | -0.68466 | -1.84936 |
| H | -5.46744 | -1.10688 | -0.23666 |
| H | -6.62461 | -0.89488 | -1.55234 |
| C | -2.74323 | 4.84283  | -1.86728 |
| H | -3.71188 | 5.12431  | -1.44811 |
| H | -2.24532 | 5.75911  | -2.19258 |
| H | -2.91148 | 4.23008  | -2.75590 |
| C | -1.60052 | 5.14361  | 0.29270  |
| H | -2.53623 | 5.41186  | 0.78915  |
| H | -0.91768 | 4.75232  | 1.05014  |
| H | -1.15412 | 6.05662  | -0.11142 |
| C | -0.53286 | 3.82681  | -1.55153 |
| H | 0.24729  | 3.49214  | -0.86304 |
| H | -0.66121 | 3.05188  | -2.30845 |
| H | -0.15657 | 4.73256  | -2.03624 |
| C | 2.75725  | 1.80966  | 2.70235  |
| H | 2.54906  | 2.46449  | 1.85389  |
| H | 1.94148  | 1.09423  | 2.79172  |
| H | 2.71990  | 2.42783  | 3.60258  |
| C | 5.12995  | 2.35305  | 2.66694  |
| H | 4.95755  | 2.91021  | 3.59181  |
| H | 6.16820  | 2.02081  | 2.66332  |
| H | 4.99116  | 3.03686  | 1.82638  |
| C | 4.39294  | 0.25848  | 3.78663  |
| H | 5.41830  | -0.11494 | 3.79993  |
| H | 4.23534  | 0.81563  | 4.71387  |
| H | 3.73021  | -0.60759 | 3.80167  |
| C | 2.26070  | 1.68656  | -2.27590 |
| H | 1.92603  | 2.08561  | -3.23608 |
| H | 1.39808  | 1.19017  | -1.84265 |
| H | 2.53968  | 2.53150  | -1.64062 |
| C | 3.07215  | -0.41535 | -3.40596 |
| H | 2.31195  | -1.04291 | -2.94732 |
| H | 2.68546  | -0.03823 | -4.35651 |
| H | 3.94670  | -1.03419 | -3.62353 |
| C | 4.48801  | 1.62047  | -3.25381 |
| H | 4.86059  | 2.43541  | -2.62833 |
| H | 5.34301  | 1.04595  | -3.61118 |
| H | 4.00648  | 2.05925  | -4.13115 |
| C | 8.31769  | -1.18741 | 0.99742  |

|    |          |          |          |
|----|----------|----------|----------|
| H  | 8.51221  | -0.23395 | 1.49528  |
| H  | 7.74850  | -1.82395 | 1.67961  |
| H  | 9.28368  | -1.66761 | 0.82534  |
| C  | 8.45440  | -0.08913 | -1.22345 |
| H  | 8.01753  | 0.03930  | -2.21560 |
| H  | 8.56778  | 0.90101  | -0.77524 |
| H  | 9.45077  | -0.52069 | -1.35169 |
| C  | 7.45561  | -2.37268 | -1.00431 |
| H  | 6.86100  | -3.04998 | -0.38656 |
| H  | 6.97220  | -2.29936 | -1.98038 |
| H  | 8.44111  | -2.82271 | -1.15115 |
| Au | -2.13066 | -2.74831 | -0.11761 |
| Cl | -3.40341 | -4.52994 | 0.52715  |
| Sn | -0.74391 | -0.74245 | -0.72355 |

#### Coordination through O atom

##### R= H

|    |          |          |          |
|----|----------|----------|----------|
| P  | 0.74314  | -0.01583 | 1.04752  |
| C  | 0.52740  | -0.12731 | -0.59086 |
| P  | -0.98612 | 0.04417  | -1.44087 |
| Cl | 1.20472  | -2.54805 | -2.80579 |
| Sn | 1.78757  | -0.24802 | -2.50362 |
| O  | -0.47798 | 0.41083  | -2.86185 |
| C  | -2.15471 | 1.23638  | -0.80459 |
| H  | -3.04228 | 1.25813  | -1.43993 |
| H  | -2.43393 | 0.94830  | 0.21232  |
| H  | -1.68962 | 2.22298  | -0.79045 |
| Au | -1.82141 | 0.77923  | -4.43424 |
| Cl | -3.26471 | 1.19392  | -6.07190 |
| H  | 2.16624  | -0.17072 | 1.09164  |
| H  | -1.67202 | -1.18353 | -1.47584 |

##### R = Me

|    |          |          |          |
|----|----------|----------|----------|
| P  | 0.70647  | -0.11544 | 1.03206  |
| C  | 0.51283  | -0.15189 | -0.60896 |
| P  | -1.02575 | -0.01046 | -1.42374 |
| Cl | 1.44122  | -2.47422 | -2.90967 |
| Sn | 1.73559  | -0.11533 | -2.54645 |
| O  | -0.53314 | 0.33854  | -2.86656 |
| C  | 2.51186  | -0.30622 | 1.30724  |
| H  | 2.70098  | -1.33330 | 1.63513  |
| H  | 3.10591  | -0.10390 | 0.41533  |
| H  | 2.82575  | 0.35450  | 2.11872  |
| C  | -1.94088 | -1.54720 | -1.43385 |
| H  | -2.26451 | -1.78973 | -0.41956 |
| H  | -2.80908 | -1.45028 | -2.08965 |
| H  | -1.28186 | -2.33223 | -1.80887 |
| C  | -2.10832 | 1.27628  | -0.80596 |
| H  | -3.01234 | 1.32541  | -1.41647 |
| H  | -2.37280 | 1.05803  | 0.23136  |
| H  | -1.58737 | 2.23317  | -0.85187 |
| Au | -1.87188 | 0.71938  | -4.43402 |
| Cl | -3.31556 | 1.14308  | -6.07120 |

##### R = t-Bu

|    |          |          |          |
|----|----------|----------|----------|
| P  | 0.79999  | -0.59565 | 0.86954  |
| C  | 0.45339  | -0.11457 | -0.67574 |
| P  | -1.18444 | -0.04990 | -1.30768 |
| Cl | 2.00813  | -1.19962 | -3.58395 |
| Sn | 1.40640  | 0.87524  | -2.52245 |
| O  | -0.91105 | 0.59155  | -2.71054 |
| C  | -2.23262 | 1.04500  | -0.34153 |
| H  | -3.21653 | 1.14759  | -0.80127 |
| H  | -2.32780 | 0.66336  | 0.67641  |

|    |          |          |          |
|----|----------|----------|----------|
| H  | -1.75399 | 2.02493  | -0.31037 |
| Au | -2.27433 | 1.68298  | -3.87030 |
| Cl | -3.70819 | 2.86351  | -5.09439 |
| C  | 2.65017  | -0.49965 | 1.13636  |
| C  | 3.09248  | -1.94491 | 1.38832  |
| C  | 3.44154  | 0.10015  | -0.00919 |
| C  | 2.84258  | 0.32440  | 2.41215  |
| H  | 2.51513  | -2.41202 | 2.19111  |
| H  | 2.98844  | -2.55887 | 0.49046  |
| H  | 4.14592  | -1.95862 | 1.68671  |
| H  | 3.14443  | 1.13522  | -0.20545 |
| H  | 4.50803  | 0.11863  | 0.23973  |
| H  | 3.33854  | -0.49292 | -0.92305 |
| H  | 3.89673  | 0.30743  | 2.70680  |
| H  | 2.55142  | 1.36802  | 2.26711  |
| H  | 2.25807  | -0.07664 | 3.24470  |
| C  | -2.02678 | -1.66985 | -1.49921 |
| C  | -3.32658 | -1.46776 | -2.28174 |
| C  | -1.09979 | -2.60840 | -2.27088 |
| C  | -2.32985 | -2.24295 | -0.11494 |
| H  | -4.03435 | -0.82026 | -1.76015 |
| H  | -3.14802 | -1.05134 | -3.27467 |
| H  | -3.80621 | -2.44262 | -2.40817 |
| H  | -0.16686 | -2.79342 | -1.73661 |
| H  | -1.61138 | -3.56513 | -2.40819 |
| H  | -0.84785 | -2.21314 | -3.25572 |
| H  | -2.76526 | -3.23817 | -0.23996 |
| H  | -1.42997 | -2.35030 | 0.49571  |
| H  | -3.05234 | -1.63608 | 0.43513  |

##### R = Ph

|    |          |          |          |
|----|----------|----------|----------|
| P  | 0.67819  | 0.16003  | 0.90746  |
| C  | 0.51033  | -0.26580 | -0.68483 |
| P  | -0.96250 | -0.18680 | -1.61552 |
| Cl | 1.76547  | -2.85136 | -2.65672 |
| Sn | 1.90810  | -0.45531 | -2.47029 |
| O  | -0.37141 | -0.14143 | -3.05752 |
| C  | -1.96968 | 1.26355  | -1.30108 |
| H  | -2.83718 | 1.25984  | -1.96336 |
| H  | -2.29853 | 1.26960  | -0.25989 |
| H  | -1.36595 | 2.15239  | -1.48975 |
| Au | -1.47828 | 0.29567  | -4.78308 |
| Cl | -2.64428 | 0.77618  | -6.61533 |
| C  | 2.43488  | -0.12413 | 1.25086  |
| C  | 3.18563  | -1.13274 | 0.63892  |
| C  | 3.04723  | 0.69844  | 2.19862  |
| C  | 4.52922  | -1.28404 | 0.94124  |
| H  | 2.70346  | -1.83381 | -0.03642 |
| C  | 4.39446  | 0.55306  | 2.48903  |
| H  | 2.46539  | 1.46552  | 2.70053  |
| C  | 5.13653  | -0.43537 | 1.85790  |
| H  | 5.10109  | -2.07452 | 0.46889  |
| H  | 4.86550  | 1.20783  | 3.21309  |
| H  | 6.18801  | -0.55566 | 2.09220  |
| C  | -2.00035 | -1.63164 | -1.40967 |
| C  | -2.79151 | -1.76650 | -0.26891 |
| C  | -1.99424 | -2.63129 | -2.37817 |
| C  | -3.57960 | -2.89198 | -0.10597 |
| H  | -2.79026 | -1.00092 | 0.49993  |
| C  | -2.78898 | -3.75453 | -2.20874 |
| H  | -1.36949 | -2.53178 | -3.25694 |
| C  | -3.57989 | -3.88435 | -1.07784 |
| H  | -4.19527 | -2.99577 | 0.77968  |
| H  | -2.78713 | -4.52967 | -2.96561 |
| H  | -4.20000 | -4.76413 | -0.94973 |

**R = Mes**

|    |          |          |          |
|----|----------|----------|----------|
| P  | 0.62038  | -0.19467 | 1.26178  |
| C  | 0.37012  | -0.34263 | -0.36662 |
| P  | -1.03924 | -0.21908 | -1.40278 |
| Cl | 2.08621  | -2.50334 | -2.44748 |
| Sn | 1.94508  | -0.14045 | -1.97704 |
| O  | -0.31323 | 0.08192  | -2.75242 |
| Au | -0.99348 | 1.32479  | -4.29898 |
| Cl | -1.68201 | 2.66269  | -5.93828 |
| C  | 2.44955  | -0.24704 | 1.36956  |
| C  | 3.11444  | -1.48148 | 1.44640  |
| C  | 3.16966  | 0.95415  | 1.46244  |
| C  | 4.49793  | -1.48498 | 1.57553  |
| C  | 4.55188  | 0.89969  | 1.58977  |
| C  | 5.23575  | -0.30897 | 1.63994  |
| H  | 5.01336  | -2.43901 | 1.63628  |
| H  | 5.10897  | 1.82949  | 1.65932  |
| C  | -2.05203 | -1.71579 | -1.47668 |
| C  | -2.78082 | -2.07599 | -0.32375 |
| C  | -2.12140 | -2.53153 | -2.63065 |
| C  | -3.54900 | -3.23199 | -0.33780 |
| C  | -2.91643 | -3.67078 | -2.58065 |
| C  | -3.63624 | -4.04459 | -1.45619 |
| H  | -4.09406 | -3.50207 | 0.56149  |
| H  | -2.96385 | -4.29570 | -3.46667 |
| C  | 2.47618  | 2.28387  | 1.41393  |
| H  | 2.12835  | 2.51939  | 0.40301  |
| H  | 1.59687  | 2.30605  | 2.06569  |
| H  | 3.14661  | 3.08506  | 1.72697  |
| C  | 6.72921  | -0.34446 | 1.74751  |
| H  | 7.18668  | -0.39810 | 0.75465  |
| H  | 7.11529  | 0.55083  | 2.23767  |
| H  | 7.06738  | -1.21743 | 2.30863  |
| C  | 2.36513  | -2.77923 | 1.39504  |
| H  | 1.48795  | -2.76380 | 2.04973  |
| H  | 2.00997  | -2.99154 | 0.38254  |
| H  | 3.00308  | -3.60672 | 1.70778  |
| C  | -2.81317 | -1.26954 | 0.94309  |
| H  | -3.59560 | -0.50591 | 0.90007  |
| H  | -3.04633 | -1.91705 | 1.78908  |
| H  | -1.87070 | -0.77278 | 1.17621  |
| C  | -1.40573 | -2.27510 | -3.92406 |
| H  | -1.70023 | -1.32559 | -4.37618 |
| H  | -0.32405 | -2.25267 | -3.79327 |
| H  | -1.64484 | -3.06882 | -4.63167 |
| C  | -4.49047 | -5.27299 | -1.46171 |
| H  | -4.70631 | -5.61419 | -0.44831 |
| H  | -5.44667 | -5.07344 | -1.95514 |
| H  | -4.00932 | -6.08777 | -2.00610 |
| C  | -2.08280 | 1.20136  | -1.03683 |
| H  | -2.90904 | 1.23858  | -1.74929 |
| H  | -2.46882 | 1.16445  | -0.02008 |
| H  | -1.46880 | 2.09564  | -1.15856 |

**R = Mes\***

|   |          |          |          |
|---|----------|----------|----------|
| P | 1.87690  | 2.16453  | -0.28398 |
| C | 0.94142  | 0.79737  | -0.31526 |
| P | -0.78709 | 0.51699  | -0.46760 |
| C | 3.56251  | 1.40562  | -0.26017 |
| C | 4.28687  | 1.36512  | 0.96067  |
| C | 4.04861  | 0.69916  | -1.38014 |
| C | 5.29531  | 0.42168  | 1.08299  |
| C | 5.04392  | -0.26024 | -1.16751 |
| C | 5.64254  | -0.45971 | 0.06255  |
| H | 5.82614  | 0.34847  | 2.02081  |
| H | 5.37084  | -0.85378 | -2.00998 |

|   |          |          |          |
|---|----------|----------|----------|
| C | 3.68969  | 0.98326  | -2.85608 |
| C | 4.04829  | 2.35865  | 2.11328  |
| C | 6.68788  | -1.54128 | 0.31374  |
| C | 2.69846  | 2.14717  | 2.80385  |
| H | 1.85409  | 2.39560  | 2.15656  |
| H | 2.57352  | 1.11144  | 3.12355  |
| H | 2.62933  | 2.79869  | 3.68002  |
| C | 4.13524  | 3.79031  | 1.56677  |
| H | 5.10843  | 3.97128  | 1.10366  |
| H | 3.36297  | 3.99979  | 0.82366  |
| H | 4.00717  | 4.50728  | 2.38253  |
| C | 5.12016  | 2.23480  | 3.19911  |
| H | 5.07106  | 1.27578  | 3.72002  |
| H | 6.12869  | 2.36608  | 2.79968  |
| H | 4.95511  | 3.01681  | 3.94368  |
| C | 2.92466  | -0.18009 | -3.49075 |
| H | 1.93455  | -0.29080 | -3.04317 |
| H | 2.78787  | -0.00291 | -4.56146 |
| H | 3.45634  | -1.12656 | -3.37266 |
| C | 2.89900  | 2.27173  | -3.07674 |
| H | 1.86179  | 2.19847  | -2.74500 |
| H | 3.36450  | 3.12552  | -2.57748 |
| H | 2.86745  | 2.49308  | -4.14724 |
| C | 5.00871  | 1.17798  | -3.62804 |
| H | 5.60614  | 1.97803  | -3.18454 |
| H | 5.62050  | 0.27645  | -3.65374 |
| H | 4.78665  | 1.45158  | -4.66275 |
| C | 6.91281  | -2.42428 | -0.91073 |
| H | 7.30726  | -1.85716 | -1.75801 |
| H | 7.64225  | -3.20113 | -0.67004 |
| H | 5.99249  | -2.92266 | -1.22596 |
| C | 6.21852  | -2.43295 | 1.46972  |
| H | 6.08075  | -1.86384 | 2.39088  |
| H | 5.26599  | -2.91368 | 1.23572  |
| H | 6.95868  | -3.21391 | 1.66491  |
| C | 8.02315  | -0.88675 | 0.68749  |
| H | 7.93667  | -0.27543 | 1.58797  |
| H | 8.77784  | -1.65492 | 0.87773  |
| H | 8.38540  | -0.24617 | -0.12057 |
| C | -2.23936 | 1.37415  | 0.23292  |
| C | -2.83474 | 0.80386  | 1.39481  |
| C | -3.05340 | 2.17048  | -0.61468 |
| C | -4.21756 | 0.70378  | 1.42315  |
| C | -4.43306 | 2.03078  | -0.51301 |
| C | -5.04087 | 1.21216  | 0.42709  |
| H | -4.67167 | 0.20045  | 2.26716  |
| H | -5.05415 | 2.59424  | -1.19598 |
| C | -2.09368 | 0.43724  | 2.69397  |
| C | -2.15987 | -1.05498 | 3.02525  |
| C | -2.79385 | 1.21290  | 3.82883  |
| H | -1.58359 | -1.64914 | 2.31788  |
| H | -1.74662 | -1.22584 | 4.02298  |
| H | -3.18869 | -1.42167 | 3.01985  |
| H | -2.81787 | 2.28529  | 3.61966  |
| H | -3.81683 | 0.87808  | 4.00244  |
| H | -2.23634 | 1.05940  | 4.75631  |
| C | -2.55811 | 3.32571  | -1.50811 |
| C | -3.22211 | 4.60154  | -0.94912 |
| C | -2.98257 | 3.17975  | -2.97222 |
| H | -2.96745 | 4.74407  | 0.10353  |
| H | -2.86372 | 5.47054  | -1.50785 |
| H | -4.30859 | 4.57404  | -1.03261 |
| H | -2.53603 | 2.30940  | -3.45299 |
| H | -4.06592 | 3.08692  | -3.06749 |
| H | -2.67754 | 4.06646  | -3.53449 |
| C | -6.53857 | 0.94075  | 0.45344  |

|    |          |          |          |
|----|----------|----------|----------|
| C  | -7.14946 | 1.55210  | 1.72020  |
| C  | -6.76341 | -0.57650 | 0.45876  |
| H  | -7.00301 | 2.63504  | 1.74560  |
| H  | -8.22413 | 1.35280  | 1.74982  |
| H  | -6.70847 | 1.13109  | 2.62590  |
| H  | -6.32177 | -1.05099 | -0.42013 |
| H  | -6.32214 | -1.04958 | 1.33783  |
| H  | -7.83519 | -0.79286 | 0.46592  |
| Cl | 2.01435  | -1.56419 | 2.13195  |
| O  | -0.83108 | -0.95939 | 0.07800  |
| Au | -2.41969 | -2.24729 | -0.41280 |
| Cl | -4.09432 | -3.61911 | -0.95430 |
| C  | -1.05891 | 3.58648  | -1.41379 |
| H  | -0.73965 | 3.70133  | -0.37584 |
| H  | -0.44005 | 2.81707  | -1.87125 |
| H  | -0.82115 | 4.51758  | -1.93405 |
| C  | -0.64734 | 0.91286  | 2.70626  |
| H  | -0.00075 | 0.34983  | 2.03789  |
| H  | -0.57938 | 1.97561  | 2.45900  |
| H  | -0.23172 | 0.77461  | 3.70713  |
| C  | -7.25177 | 1.53025  | -0.76052 |
| H  | -7.19128 | 2.62173  | -0.78409 |
| H  | -6.84481 | 1.13916  | -1.69632 |
| H  | -8.31061 | 1.26433  | -0.72373 |
| Sn | 1.49530  | -1.42466 | -0.21651 |
| C  | -1.11950 | 0.31801  | -2.23760 |
| H  | -0.85514 | 1.18392  | -2.83717 |
| H  | -0.51253 | -0.53194 | -2.55851 |
| H  | -2.17022 | 0.06215  | -2.38107 |

#### Coordination through P(sp<sup>2</sup>) atom

##### R = H

|    |          |          |          |
|----|----------|----------|----------|
| P  | 0.67524  | 0.00286  | 0.91186  |
| C  | 0.41429  | -0.23392 | -0.68171 |
| P  | -1.09999 | -0.18773 | -1.56555 |
| Cl | 1.17242  | -2.80753 | -2.72867 |
| Sn | 1.54920  | -0.43510 | -2.71759 |
| O  | -0.63016 | 0.01623  | -3.00536 |
| C  | -2.29149 | 1.03890  | -1.04491 |
| H  | -3.16158 | 0.99170  | -1.70300 |
| H  | -2.60016 | 0.84089  | -0.01540 |
| H  | -1.84145 | 2.03054  | -1.10705 |
| Au | -0.68395 | 0.42402  | 2.59549  |
| Cl | -2.12108 | 0.87669  | 4.27753  |
| H  | 2.07052  | -0.08545 | 1.11248  |
| H  | -1.74779 | -1.42662 | -1.39148 |

##### R = Me

|    |          |          |          |
|----|----------|----------|----------|
| P  | 0.73095  | 0.02971  | 0.87470  |
| C  | 0.41248  | -0.18726 | -0.70878 |
| P  | -1.15986 | -0.24548 | -1.49477 |
| Cl | 1.34885  | -2.81856 | -2.64833 |
| Sn | 1.43007  | -0.40774 | -2.78954 |
| O  | -0.76486 | -0.18296 | -2.97820 |
| C  | 2.50742  | -0.00335 | 1.21765  |
| H  | 2.71831  | -0.83961 | 1.88880  |
| H  | 3.08156  | -0.11391 | 0.29846  |
| H  | 2.79013  | 0.91640  | 1.73450  |
| C  | -2.01311 | -1.76896 | -1.09770 |
| H  | -2.27157 | -1.79156 | -0.03700 |
| H  | -2.92076 | -1.84110 | -1.70090 |
| H  | -1.34949 | -2.60147 | -1.33745 |
| C  | -2.24706 | 1.11272  | -1.06133 |
| H  | -3.15790 | 1.04705  | -1.66040 |

|    |          |         |          |
|----|----------|---------|----------|
| H  | -2.50286 | 1.06939 | -0.00032 |
| H  | -1.74423 | 2.05648 | -1.27498 |
| Au | -0.69312 | 0.32792 | 2.54153  |
| Cl | -2.20158 | 0.63318 | 4.20193  |

##### R = *t*-Bu

|    |          |          |          |
|----|----------|----------|----------|
| P  | 0.73088  | 0.09566  | 0.82464  |
| C  | 0.45760  | -0.32911 | -0.72948 |
| P  | -1.08757 | -0.46456 | -1.57326 |
| Cl | 2.05350  | -2.79744 | -2.69626 |
| Sn | 1.56941  | -0.43296 | -2.77994 |
| O  | -0.62337 | -0.57266 | -3.03803 |
| C  | -2.08822 | 1.01337  | -1.34703 |
| H  | -2.99723 | 0.94901  | -1.94687 |
| H  | -2.34501 | 1.15250  | -0.29551 |
| H  | -1.50143 | 1.86858  | -1.68545 |
| Au | -0.74698 | 0.66137  | 2.38477  |
| Cl | -2.28602 | 1.27607  | 3.93411  |
| C  | 2.51771  | 0.11946  | 1.31177  |
| C  | 2.80824  | 1.50212  | 1.89932  |
| C  | 2.67349  | -0.94855 | 2.39966  |
| C  | 3.44094  | -0.17540 | 0.14175  |
| H  | 2.71698  | 2.28958  | 1.14735  |
| H  | 2.13555  | 1.74040  | 2.72681  |
| H  | 3.83230  | 1.51816  | 2.28400  |
| H  | 2.49501  | -1.95249 | 2.00782  |
| H  | 3.69605  | -0.91269 | 2.78756  |
| H  | 1.99206  | -0.77736 | 3.23671  |
| H  | 4.47640  | -0.18385 | 0.49556  |
| H  | 3.23707  | -1.15116 | -0.30566 |
| H  | 3.37159  | 0.59549  | -0.63071 |
| C  | -2.09681 | -1.92990 | -1.11661 |
| C  | -1.21165 | -3.17335 | -1.17938 |
| C  | -2.69135 | -1.77525 | 0.27968  |
| C  | -3.21088 | -2.03948 | -2.16288 |
| H  | -0.76215 | -3.30699 | -2.16380 |
| H  | -0.40393 | -3.13538 | -0.44656 |
| H  | -1.82744 | -4.05050 | -0.96086 |
| H  | -3.36546 | -0.92022 | 0.35916  |
| H  | -3.27100 | -2.67254 | 0.51444  |
| H  | -1.92125 | -1.67543 | 1.04787  |
| H  | -3.77973 | -2.95316 | -1.96902 |
| H  | -3.91111 | -1.20258 | -2.11282 |
| H  | -2.80703 | -2.09824 | -3.17493 |

##### R = Ph

|    |          |          |          |
|----|----------|----------|----------|
| P  | 0.71616  | 0.21197  | 0.70588  |
| C  | 0.49216  | -0.39420 | -0.79412 |
| P  | -1.01014 | -0.59388 | -1.68329 |
| Cl | 1.87064  | -3.23439 | -2.25948 |
| Sn | 1.69621  | -0.86514 | -2.71083 |
| O  | -0.49210 | -0.87875 | -3.10067 |
| C  | -2.05630 | 0.86331  | -1.66063 |
| H  | -2.92107 | 0.68915  | -2.30365 |
| H  | -2.39271 | 1.08705  | -0.64645 |
| H  | -1.48176 | 1.70957  | -2.04007 |
| Au | -0.79368 | 1.08956  | 2.07166  |
| Cl | -2.41280 | 1.96462  | 3.39440  |
| C  | 2.43213  | 0.13470  | 1.20049  |
| C  | 2.88862  | 1.03725  | 2.16203  |
| C  | 3.30667  | -0.81356 | 0.66375  |
| C  | 4.21675  | 1.01759  | 2.55362  |
| H  | 2.20089  | 1.75558  | 2.59660  |
| C  | 4.63012  | -0.83240 | 1.06751  |
| H  | 2.94031  | -1.56056 | -0.03284 |
| C  | 5.08694  | 0.08645  | 2.00431  |

|   |          |          |          |
|---|----------|----------|----------|
| H | 4.57156  | 1.72611  | 3.29270  |
| H | 5.30497  | -1.57531 | 0.65880  |
| H | 6.12437  | 0.06643  | 2.31804  |
| C | -1.97968 | -1.96866 | -1.06338 |
| C | -2.76116 | -1.84245 | 0.08510  |
| C | -1.92409 | -3.18362 | -1.74126 |
| C | -3.48696 | -2.92713 | 0.54634  |
| H | -2.80266 | -0.90571 | 0.63128  |
| C | -2.65547 | -4.26459 | -1.27365 |
| H | -1.30572 | -3.27608 | -2.62565 |
| C | -3.43495 | -4.13687 | -0.13396 |
| H | -4.09286 | -2.82726 | 1.43912  |
| H | -2.61145 | -5.21029 | -1.80091 |
| H | -4.00427 | -4.98466 | 0.22988  |

**R = Mes**

|    |          |          |          |
|----|----------|----------|----------|
| P  | 0.69432  | 0.33363  | 1.11895  |
| C  | 0.32165  | -0.40617 | -0.28917 |
| P  | -1.08847 | -0.53284 | -1.34238 |
| Cl | 1.80669  | -3.04799 | -2.01161 |
| Sn | 1.75177  | -0.62532 | -2.07433 |
| O  | -0.38279 | -0.43424 | -2.70396 |
| Au | -0.58015 | 1.36398  | 2.61287  |
| Cl | -1.89139 | 2.44340  | 4.11554  |
| C  | 2.47976  | 0.26706  | 1.36430  |
| C  | 3.23359  | 1.44558  | 1.23466  |
| C  | 3.09175  | -0.94805 | 1.71268  |
| C  | 4.60446  | 1.37921  | 1.43527  |
| C  | 4.46756  | -0.95638 | 1.90757  |
| C  | 5.24031  | 0.18981  | 1.77331  |
| H  | 5.19322  | 2.28477  | 1.32438  |
| H  | 4.94819  | -1.89169 | 2.17755  |
| C  | -2.01412 | -2.07715 | -1.14647 |
| C  | -2.63024 | -2.36525 | 0.08798  |
| C  | -2.14410 | -2.99051 | -2.21946 |
| C  | -3.30533 | -3.56747 | 0.25060  |
| C  | -2.84537 | -4.16979 | -1.99645 |
| C  | -3.41724 | -4.49169 | -0.77479 |
| H  | -3.76293 | -3.77785 | 1.21251  |
| H  | -2.94297 | -4.86754 | -2.82218 |
| C  | 2.59410  | 2.75165  | 0.86992  |
| H  | 2.11567  | 2.70499  | -0.11315 |
| H  | 1.82128  | 3.03595  | 1.59101  |
| H  | 3.33479  | 3.55104  | 0.84097  |
| C  | 2.31297  | -2.21800 | 1.88367  |
| H  | 1.40630  | -2.05977 | 2.47483  |
| H  | 2.00264  | -2.63113 | 0.91975  |
| H  | 2.91746  | -2.96934 | 2.39267  |
| C  | 6.71687  | 0.15423  | 2.01874  |
| H  | 6.94103  | 0.42362  | 3.05563  |
| H  | 7.12625  | -0.84157 | 1.84253  |
| H  | 7.24412  | 0.86268  | 1.37733  |
| C  | -2.65341 | -1.41983 | 1.25114  |
| H  | -2.73677 | -1.97010 | 2.18901  |
| H  | -1.76667 | -0.79282 | 1.32536  |
| H  | -3.52034 | -0.75421 | 1.19525  |
| C  | -1.59605 | -2.79607 | -3.60479 |
| H  | -1.85459 | -1.82658 | -4.02762 |
| H  | -0.50756 | -2.86743 | -3.61105 |
| H  | -1.99084 | -3.57567 | -4.25718 |
| C  | -4.11696 | -5.79848 | -0.57050 |
| H  | -4.62013 | -6.12718 | -1.48161 |
| H  | -3.39914 | -6.57764 | -0.29563 |
| H  | -4.85579 | -5.73544 | 0.22993  |
| C  | -2.23461 | 0.84461  | -1.19070 |
| H  | -2.68980 | 0.88749  | -0.20189 |

|   |          |         |          |
|---|----------|---------|----------|
| H | -1.68125 | 1.76710 | -1.37340 |
| H | -3.01438 | 0.73379 | -1.94701 |

**R = Mes\***

|    |          |          |          |
|----|----------|----------|----------|
| P  | -1.04304 | 0.95903  | 0.04330  |
| C  | -0.19471 | -0.36960 | 0.47801  |
| P  | 1.44737  | -0.95275 | 0.77332  |
| Cl | -1.45203 | -3.13709 | -1.58144 |
| O  | 1.24827  | -2.44575 | 0.43104  |
| C  | 3.08145  | -0.45965 | 0.10646  |
| C  | 3.62060  | -1.27891 | -0.92593 |
| C  | 3.98275  | 0.29419  | 0.90408  |
| C  | 4.96901  | -1.59928 | -0.85787 |
| C  | 5.32438  | -0.07662 | 0.90413  |
| C  | 5.82976  | -1.08731 | 0.10333  |
| H  | 5.36492  | -2.27870 | -1.60175 |
| H  | 5.99940  | 0.46577  | 1.55144  |
| C  | -2.79730 | 0.45608  | 0.09097  |
| C  | -3.47567 | 0.09961  | -1.10445 |
| C  | -3.38158 | 0.16927  | 1.34988  |
| C  | -4.58291 | -0.73480 | -0.98862 |
| C  | -4.47441 | -0.69201 | 1.37117  |
| C  | -5.06054 | -1.20400 | 0.22550  |
| H  | -5.07813 | -1.05448 | -1.89003 |
| H  | -4.89010 | -0.96779 | 2.33177  |
| C  | -3.13055 | 0.65338  | -2.50115 |
| C  | -3.00298 | 0.78756  | 2.71498  |
| C  | -6.20616 | -2.20526 | 0.33185  |
| C  | 3.66741  | 1.61334  | 1.63762  |
| C  | 2.88166  | -1.73506 | -2.19720 |
| C  | 7.27393  | -1.56718 | 0.17905  |
| C  | -4.28821 | 1.35483  | 3.34744  |
| H  | -4.04033 | 1.84077  | 4.29447  |
| H  | -4.74735 | 2.10007  | 2.69377  |
| H  | -5.03382 | 0.58923  | 3.56006  |
| C  | -2.03537 | 1.96757  | 2.65286  |
| H  | -1.00961 | 1.67235  | 2.42880  |
| H  | -2.34923 | 2.72219  | 1.92766  |
| H  | -2.00588 | 2.45160  | 3.63285  |
| C  | -2.41911 | -0.27449 | 3.65061  |
| H  | -3.09630 | -1.12181 | 3.77539  |
| H  | -1.47142 | -0.65543 | 3.26376  |
| H  | -2.23219 | 0.15640  | 4.63842  |
| C  | -7.37212 | -1.57717 | 1.10403  |
| H  | -8.19591 | -2.29155 | 1.18571  |
| H  | -7.08244 | -1.28800 | 2.11634  |
| H  | -7.74454 | -0.68558 | 0.59364  |
| C  | -6.71897 | -2.64722 | -1.03619 |
| H  | -7.51875 | -3.37982 | -0.90443 |
| H  | -7.13103 | -1.81134 | -1.60729 |
| H  | -5.93277 | -3.11844 | -1.63088 |
| C  | -5.70860 | -3.44731 | 1.08144  |
| H  | -4.88185 | -3.92060 | 0.54616  |
| H  | -5.36173 | -3.20143 | 2.08745  |
| H  | -6.51643 | -4.17823 | 1.17591  |
| C  | -4.04866 | 0.08413  | -3.58746 |
| H  | -5.10053 | 0.31904  | -3.41000 |
| H  | -3.77365 | 0.53706  | -4.54227 |
| H  | -3.93944 | -0.99807 | -3.69214 |
| C  | -3.35936 | 2.17102  | -2.47674 |
| H  | -4.39675 | 2.40196  | -2.22174 |
| H  | -2.71573 | 2.67583  | -1.75285 |
| H  | -3.14530 | 2.59778  | -3.46023 |
| C  | -1.70293 | 0.33976  | -2.95481 |
| H  | -0.94027 | 0.87087  | -2.38177 |
| H  | -1.49384 | -0.72876 | -2.89622 |



|    |          |          |          |
|----|----------|----------|----------|
| H  | -1.57685 | 0.66618  | -3.99094 |
| C  | 2.25046  | 2.12293  | 1.41135  |
| H  | 2.03190  | 2.18250  | 0.34321  |
| H  | 1.46995  | 1.52920  | 1.88272  |
| H  | 2.15686  | 3.13463  | 1.81187  |
| C  | 4.57429  | 2.68520  | 0.99563  |
| H  | 4.34310  | 3.66049  | 1.43157  |
| H  | 5.63380  | 2.48706  | 1.15886  |
| H  | 4.40087  | 2.74855  | -0.08064 |
| C  | 3.99344  | 1.56236  | 3.13337  |
| H  | 5.04054  | 1.30582  | 3.30624  |
| H  | 3.81797  | 2.54461  | 3.57997  |
| H  | 3.38513  | 0.83647  | 3.67311  |
| C  | 1.53607  | -1.04561 | -2.39148 |
| H  | 1.16738  | -1.25942 | -3.39743 |
| H  | 0.76917  | -1.40505 | -1.71129 |
| H  | 1.62776  | 0.03975  | -2.29541 |
| C  | 2.71215  | -3.25554 | -2.25017 |
| H  | 2.08859  | -3.60847 | -1.43111 |
| H  | 2.23872  | -3.54063 | -3.19350 |
| H  | 3.67947  | -3.76165 | -2.19525 |
| C  | 3.74113  | -1.29671 | -3.40034 |
| H  | 3.92245  | -0.21915 | -3.38559 |
| H  | 4.70591  | -1.80274 | -3.44433 |
| H  | 3.20468  | -1.53737 | -4.32158 |
| C  | 8.04796  | -0.89662 | 1.31082  |
| H  | 8.13921  | 0.18217  | 1.16097  |
| H  | 7.57857  | -1.07185 | 2.28220  |
| H  | 9.05983  | -1.30643 | 1.35292  |
| C  | 7.98885  | -1.26141 | -1.14256 |
| H  | 7.51209  | -1.76181 | -1.98755 |
| H  | 7.99238  | -0.18793 | -1.34648 |
| H  | 9.02664  | -1.60271 | -1.09527 |
| C  | 7.28034  | -3.08129 | 0.42124  |
| H  | 6.78888  | -3.32883 | 1.36532  |
| H  | 6.76425  | -3.62055 | -0.37540 |
| H  | 8.30861  | -3.45053 | 0.46521  |
| Sn | -0.95938 | -2.57224 | 0.71914  |
| Au | -0.38701 | 3.01376  | -0.51611 |
| Cl | 0.27845  | 5.12142  | -1.04749 |
| C  | 1.64038  | -0.95342 | 2.57701  |
| H  | 2.59153  | -1.43378 | 2.81221  |
| H  | 1.58567  | 0.01792  | 3.05644  |
| H  | 0.83338  | -1.58271 | 2.96016  |

#### Coordination through $\pi(\text{C}=\text{P})$ bond

##### R = H

|    |          |          |          |
|----|----------|----------|----------|
| P  | 0.85188  | -0.12399 | 1.06203  |
| C  | 0.54016  | 0.06450  | -0.61974 |
| P  | -1.00470 | -0.14556 | -1.45334 |
| Cl | 1.42426  | -2.67790 | -2.33647 |
| Sn | 1.60765  | -0.29712 | -2.68808 |
| O  | -0.61191 | -0.05961 | -2.92686 |
| C  | -2.33753 | 0.97664  | -1.04299 |
| H  | -3.20949 | 0.72686  | -1.65140 |
| H  | -2.59015 | 0.87913  | 0.01519  |
| H  | -2.03157 | 2.00275  | -1.25240 |
| Au | 0.85145  | 2.06506  | 0.10287  |
| Cl | 1.05635  | 4.30628  | 0.16054  |
| H  | 2.27440  | -0.25453 | 1.00043  |
| H  | -1.49270 | -1.42334 | -1.11344 |

##### R = Me

|   |         |          |         |
|---|---------|----------|---------|
| P | 0.74859 | -0.12825 | 1.04354 |
|---|---------|----------|---------|

|    |          |          |          |
|----|----------|----------|----------|
| C  | 0.45715  | 0.14730  | -0.62601 |
| P  | -1.05794 | -0.16708 | -1.49439 |
| Cl | 1.76719  | -2.55848 | -2.16259 |
| Sn | 1.60738  | -0.18049 | -2.64341 |
| O  | -0.58680 | -0.21716 | -2.95472 |
| C  | 2.56478  | -0.35760 | 1.16645  |
| H  | 2.74798  | -1.43675 | 1.12619  |
| H  | 3.12194  | 0.12506  | 0.36383  |
| H  | 2.91282  | 0.00941  | 2.13397  |
| C  | -1.75027 | -1.73884 | -0.97952 |
| H  | -2.06838 | -1.69264 | 0.06396  |
| H  | -2.60302 | -1.98354 | -1.61616 |
| H  | -0.97917 | -2.50223 | -1.09879 |
| C  | -2.34290 | 1.06951  | -1.29189 |
| H  | -3.19104 | 0.80288  | -1.92686 |
| H  | -2.66673 | 1.11781  | -0.25063 |
| H  | -1.96260 | 2.04546  | -1.59611 |
| Au | 0.61400  | 2.11862  | 0.21229  |
| Cl | 0.69219  | 4.35690  | 0.48190  |

##### R = *t*-Bu

|    |          |          |          |
|----|----------|----------|----------|
| P  | 1.06166  | -0.06261 | 1.10549  |
| C  | 0.59437  | 0.12266  | -0.53928 |
| P  | -1.00593 | -0.28670 | -1.22347 |
| Cl | 2.22238  | -2.37499 | -2.41518 |
| Sn | 1.50396  | -0.07304 | -2.70761 |
| O  | -0.65235 | -0.55010 | -2.69796 |
| C  | -1.83237 | -1.75838 | -0.49366 |
| Au | 0.68965  | 2.13780  | 0.23311  |
| Cl | 0.65833  | 4.38493  | 0.46010  |
| C  | 2.92704  | -0.15099 | 1.23183  |
| C  | 3.71915  | 0.33931  | 0.03374  |
| C  | 3.28930  | 0.65465  | 2.48098  |
| C  | 3.20424  | -1.64014 | 1.47579  |
| H  | 3.56978  | -0.30593 | -0.83525 |
| H  | 3.47302  | 1.37091  | -0.22991 |
| H  | 4.78894  | 0.30445  | 0.26599  |
| H  | 2.69985  | 0.34561  | 3.34896  |
| H  | 4.34504  | 0.49760  | 2.72240  |
| H  | 3.13304  | 1.72565  | 2.32970  |
| H  | 4.26806  | -1.77503 | 1.69631  |
| H  | 2.64055  | -2.02541 | 2.33058  |
| H  | 2.96350  | -2.24201 | 0.59609  |
| C  | -2.16355 | 1.09073  | -1.13271 |
| H  | -2.39565 | 1.35854  | -0.10197 |
| H  | -1.71349 | 1.95173  | -1.62950 |
| H  | -3.08021 | 0.82492  | -1.66268 |
| C  | -2.37152 | -1.43227 | 0.89821  |
| H  | -2.80877 | -2.33873 | 1.32673  |
| H  | -1.58346 | -1.09600 | 1.57666  |
| H  | -3.15557 | -0.67274 | 0.87038  |
| C  | -0.83429 | -2.91302 | -0.42059 |
| H  | -0.03157 | -2.71495 | 0.29162  |
| H  | -1.36306 | -3.80989 | -0.08516 |
| H  | -0.37969 | -3.12468 | -1.38935 |
| C  | -2.97846 | -2.14149 | -1.43527 |
| H  | -3.45218 | -3.05110 | -1.05518 |
| H  | -3.74964 | -1.36977 | -1.48819 |
| H  | -2.61608 | -2.34125 | -2.44480 |

##### R = Ph

|    |          |          |          |
|----|----------|----------|----------|
| P  | 0.61932  | 0.11764  | 0.98191  |
| C  | 0.38094  | 0.17599  | -0.71762 |
| P  | -1.15098 | -0.08446 | -1.57198 |
| Cl | 1.77909  | -2.23886 | -2.93819 |
| Sn | 1.47604  | 0.16645  | -2.80389 |

|    |          |          |          |
|----|----------|----------|----------|
| O  | -0.73409 | 0.06027  | -3.04070 |
| C  | -2.47604 | 1.06163  | -1.17468 |
| H  | -3.34644 | 0.81327  | -1.78547 |
| H  | -2.74186 | 0.98857  | -0.11863 |
| H  | -2.15107 | 2.07965  | -1.39481 |
| Au | 0.61533  | 2.25076  | -0.12017 |
| Cl | 0.79385  | 4.50050  | -0.12707 |
| C  | 2.39925  | -0.13401 | 1.22660  |
| C  | 2.96408  | 0.39641  | 2.38883  |
| C  | 3.18877  | -0.89792 | 0.36637  |
| C  | 4.30891  | 0.20923  | 2.65965  |
| H  | 2.34929  | 0.97128  | 3.07462  |
| C  | 4.52991  | -1.09799 | 0.65173  |
| H  | 2.74892  | -1.36642 | -0.50775 |
| C  | 5.09279  | -0.53716 | 1.79012  |
| H  | 4.74571  | 0.64128  | 3.55253  |
| H  | 5.13581  | -1.69880 | -0.01679 |
| H  | 6.14366  | -0.69177 | 2.00677  |
| C  | -1.78479 | -1.73117 | -1.23680 |
| C  | -1.79273 | -2.67283 | -2.26082 |
| C  | -2.27395 | -2.06721 | 0.02508  |
| C  | -2.29581 | -3.94327 | -2.02296 |
| H  | -1.39558 | -2.40820 | -3.23284 |
| C  | -2.77290 | -3.33735 | 0.25632  |
| H  | -2.25681 | -1.34480 | 0.83499  |
| C  | -2.78513 | -4.27451 | -0.76908 |
| H  | -2.29761 | -4.67737 | -2.82003 |
| H  | -3.15038 | -3.59858 | 1.23800  |
| H  | -3.17457 | -5.26941 | -0.58549 |

**R = Mes**

|    |          |          |          |
|----|----------|----------|----------|
| P  | 0.56280  | 0.08271  | 1.35659  |
| C  | 0.15285  | 0.26884  | -0.30660 |
| P  | -1.30610 | -0.00426 | -1.30398 |
| Cl | 2.12016  | -1.37421 | -2.92884 |
| Sn | 1.35962  | 0.82985  | -2.23878 |
| O  | -0.78303 | 0.45170  | -2.67383 |
| Au | 0.03934  | 2.27368  | 0.52660  |
| Cl | -0.29775 | 4.50367  | 0.71534  |
| C  | 2.38587  | -0.06019 | 1.36795  |
| C  | 3.23130  | 0.91860  | 1.91249  |
| C  | 2.91103  | -1.30510 | 0.97129  |
| C  | 4.59914  | 0.67287  | 1.94952  |
| C  | 4.28320  | -1.50225 | 1.03487  |
| C  | 5.14867  | -0.51857 | 1.49687  |
| H  | 5.25303  | 1.43655  | 2.36048  |
| H  | 4.68458  | -2.46280 | 0.72569  |
| C  | -1.82827 | -1.73906 | -1.27232 |
| C  | -1.78339 | -2.54599 | -2.43282 |
| C  | -2.30271 | -2.28701 | -0.06312 |
| C  | -2.14822 | -3.88295 | -2.31796 |
| C  | -2.64185 | -3.63230 | -0.01119 |
| C  | -2.55647 | -4.45532 | -1.12278 |
| H  | -2.10979 | -4.49953 | -3.21048 |
| H  | -2.99456 | -4.04215 | 0.93055  |
| C  | 2.71916  | 2.21363  | 2.46770  |
| H  | 2.52578  | 2.95049  | 1.68201  |
| H  | 1.78557  | 2.08259  | 3.02193  |
| H  | 3.45005  | 2.65140  | 3.14942  |
| C  | 2.02927  | -2.43636 | 0.53037  |
| H  | 1.16417  | -2.55849 | 1.19114  |
| H  | 1.65222  | -2.28496 | -0.48339 |
| H  | 2.58541  | -3.37464 | 0.53936  |
| C  | 6.62911  | -0.74225 | 1.51225  |
| H  | 6.87252  | -1.78488 | 1.72558  |
| H  | 7.06515  | -0.49967 | 0.53807  |

|   |          |          |          |
|---|----------|----------|----------|
| H | 7.12022  | -0.11404 | 2.25722  |
| C | -2.54643 | -1.48968 | 1.18667  |
| H | -2.42012 | -2.11948 | 2.06823  |
| H | -1.88312 | -0.63523 | 1.31058  |
| H | -3.57601 | -1.11773 | 1.20141  |
| C | -1.39681 | -2.07144 | -3.80401 |
| H | -1.93258 | -1.16945 | -4.09689 |
| H | -0.33237 | -1.84101 | -3.86248 |
| H | -1.61575 | -2.85604 | -4.52907 |
| C | -2.88667 | -5.91237 | -1.03744 |
| H | -3.32346 | -6.27660 | -1.96898 |
| H | -1.98209 | -6.49955 | -0.85064 |
| H | -3.58469 | -6.11737 | -0.22415 |
| C | -2.75107 | 1.01148  | -0.94052 |
| H | -2.47352 | 2.05974  | -1.06506 |
| H | -3.52209 | 0.75746  | -1.67205 |
| H | -3.13909 | 0.85545  | 0.06364  |

**R = Mes\***

|    |          |          |          |
|----|----------|----------|----------|
| P  | 0.68890  | -0.04664 | 1.16220  |
| C  | 0.39749  | 0.08040  | -0.54479 |
| P  | -1.06162 | -0.12174 | -1.62624 |
| O  | -0.33331 | -0.11653 | -2.98440 |
| Cl | 2.84466  | -1.33981 | -3.23497 |
| Au | 0.29580  | 2.13274  | 0.17552  |
| Cl | -0.07742 | 4.37762  | 0.15454  |
| C  | 2.54294  | -0.08611 | 1.25979  |
| C  | 3.25599  | -1.20772 | 0.75393  |
| C  | 3.28302  | 1.05106  | 1.66445  |
| C  | 4.55742  | -1.01069 | 0.31720  |
| C  | 4.58529  | 1.18368  | 1.17721  |
| C  | 5.21677  | 0.20881  | 0.42564  |
| H  | 5.08608  | -1.85187 | -0.11186 |
| H  | 5.12656  | 2.08695  | 1.42194  |
| C  | 2.88996  | 2.07025  | 2.75588  |
| C  | 2.80950  | -2.67557 | 0.90451  |
| C  | 6.59794  | 0.39440  | -0.19189 |
| C  | -2.09684 | 1.36394  | -1.70076 |
| H  | -2.61957 | 1.60732  | -0.78132 |
| H  | -1.46110 | 2.20433  | -1.98524 |
| H  | -2.82193 | 1.18525  | -2.49803 |
| C  | 3.89725  | 1.84768  | 3.90347  |
| H  | 3.83718  | 0.82470  | 4.28373  |
| H  | 4.92542  | 2.02864  | 3.58871  |
| H  | 3.67019  | 2.53220  | 4.72540  |
| C  | 3.01308  | 3.51958  | 2.27905  |
| H  | 2.31671  | 3.74486  | 1.47027  |
| H  | 2.78679  | 4.19804  | 3.10623  |
| H  | 4.02156  | 3.75200  | 1.93277  |
| C  | 1.51324  | 1.87150  | 3.38312  |
| H  | 1.43319  | 2.51292  | 4.26490  |
| H  | 0.69167  | 2.15688  | 2.72267  |
| H  | 1.35692  | 0.84093  | 3.71160  |
| C  | 3.12459  | -3.52522 | -0.32853 |
| H  | 2.65716  | -3.12190 | -1.22519 |
| H  | 4.19656  | -3.59726 | -0.51825 |
| H  | 2.75964  | -4.54373 | -0.16944 |
| C  | 3.62418  | -3.22275 | 2.09257  |
| H  | 4.69677  | -3.16167 | 1.90100  |
| H  | 3.41285  | -2.66146 | 3.00638  |
| H  | 3.36645  | -4.27179 | 2.26666  |
| C  | 1.34221  | -2.88076 | 1.26096  |
| H  | 1.06102  | -2.35006 | 2.17603  |
| H  | 0.66943  | -2.58908 | 0.45486  |
| H  | 1.16870  | -3.94382 | 1.45167  |
| C  | 7.17123  | 1.78253  | 0.07971  |

|    |          |          |          |
|----|----------|----------|----------|
| H  | 6.52331  | 2.57183  | -0.30945 |
| H  | 7.32722  | 1.95913  | 1.14729  |
| H  | 8.14145  | 1.87849  | -0.41355 |
| C  | 6.48393  | 0.20597  | -1.70944 |
| H  | 7.46830  | 0.30357  | -2.17610 |
| H  | 6.07962  | -0.77432 | -1.96827 |
| H  | 5.82399  | 0.95832  | -2.14821 |
| C  | 7.57014  | -0.64573 | 0.37693  |
| H  | 7.65965  | -0.54703 | 1.46175  |
| H  | 7.25114  | -1.66611 | 0.15612  |
| H  | 8.56290  | -0.50833 | -0.06045 |
| C  | -2.35464 | -1.44373 | -1.65252 |
| C  | -2.33248 | -2.35422 | -2.75038 |
| C  | -3.60193 | -1.21356 | -1.00947 |
| C  | -3.53908 | -2.65589 | -3.36694 |
| C  | -1.11488 | -3.15970 | -3.24045 |
| C  | -4.76808 | -1.58515 | -1.67264 |
| C  | -3.81522 | -0.75060 | 0.44530  |
| C  | -4.77062 | -2.21601 | -2.90452 |
| H  | -3.50987 | -3.28448 | -4.24722 |
| C  | -0.61212 | -2.69905 | -4.61136 |
| C  | -1.54699 | -4.63467 | -3.37696 |
| C  | 0.00310  | -3.17845 | -2.20698 |
| H  | -5.71273 | -1.37084 | -1.19291 |
| C  | -2.53452 | -0.42350 | 1.19255  |
| C  | -4.42909 | -1.95957 | 1.18057  |
| C  | -4.78930 | 0.42579  | 0.56779  |
| C  | -6.04220 | -2.51220 | -3.68961 |
| H  | 0.19877  | -3.35288 | -4.94301 |
| H  | -1.41434 | -2.75699 | -5.35227 |
| H  | -0.24061 | -1.67880 | -4.58179 |
| H  | -2.23234 | -4.80535 | -4.20786 |
| H  | -0.65751 | -5.24072 | -3.56661 |
| H  | -2.01889 | -5.00109 | -2.46197 |
| H  | 0.44419  | -2.20289 | -2.02094 |
| H  | -0.36079 | -3.59495 | -1.26433 |
| H  | 0.81691  | -3.81229 | -2.56389 |
| H  | -1.81170 | -1.23744 | 1.11551  |
| H  | -2.05830 | 0.49910  | 0.86118  |
| H  | -2.75383 | -0.28621 | 2.25392  |
| H  | -4.57669 | -1.70791 | 2.23445  |
| H  | -5.39425 | -2.24931 | 0.76378  |
| H  | -3.76472 | -2.82522 | 1.12638  |
| H  | -5.77150 | 0.19245  | 0.15391  |
| H  | -4.92994 | 0.67298  | 1.62323  |
| H  | -4.42509 | 1.32265  | 0.06464  |
| C  | -7.28415 | -1.93029 | -3.01985 |
| C  | -6.22804 | -4.02882 | -3.81818 |
| C  | -5.91451 | -1.89633 | -5.08804 |
| H  | -7.46969 | -2.37994 | -2.04102 |
| H  | -7.20677 | -0.84747 | -2.89321 |
| H  | -8.16039 | -2.12942 | -3.64121 |
| H  | -5.39174 | -4.49785 | -4.34001 |
| H  | -6.31567 | -4.49728 | -2.83480 |
| H  | -7.13865 | -4.24850 | -4.38227 |
| H  | -5.79612 | -0.81166 | -5.02883 |
| H  | -5.05564 | -2.29731 | -5.62972 |
| H  | -6.81144 | -2.10933 | -5.67599 |
| Sn | 1.68048  | 0.64198  | -2.45515 |

**[R-P=C(Sn(II)Cl)-P(S)ClR](AuCl)**

Coordination through Sn(II) atom

**R= H**

|    |          |          |          |
|----|----------|----------|----------|
| P  | 0.68673  | 0.29534  | 0.99904  |
| C  | 0.43878  | -0.11822 | -0.58909 |
| P  | -1.11866 | -0.29764 | -1.36007 |
| Cl | 1.62196  | -2.37551 | -2.90618 |
| Sn | 1.63754  | -0.06445 | -2.45401 |
| Au | 3.47472  | 1.53095  | -3.05247 |
| Cl | 5.13893  | 2.99612  | -3.51955 |
| Cl | -2.66537 | 0.51450  | -0.36865 |
| H  | 2.11229  | 0.38082  | 0.94678  |
| H  | -1.49870 | -1.65074 | -1.36160 |
| S  | -0.84999 | 0.42691  | -3.19329 |

**R = Me**

|    |          |          |          |
|----|----------|----------|----------|
| P  | 0.66074  | 0.10158  | 1.05053  |
| C  | 0.39260  | -0.18564 | -0.56077 |
| P  | -1.18176 | -0.26045 | -1.31527 |
| Cl | 1.58887  | -2.38499 | -2.97388 |
| Sn | 1.57508  | -0.08183 | -2.42554 |
| C  | 2.48167  | 0.10759  | 1.22498  |
| H  | 2.78593  | -0.86745 | 1.61993  |
| H  | 3.01607  | 0.29893  | 0.29323  |
| H  | 2.76160  | 0.85846  | 1.96714  |
| C  | -1.83622 | -1.93050 | -1.33599 |
| H  | -2.01141 | -2.26511 | -0.31231 |
| H  | -2.76677 | -1.94314 | -1.90496 |
| H  | -1.09146 | -2.56480 | -1.82230 |
| Au | 3.49915  | 1.44983  | -2.92009 |
| Cl | 5.25858  | 2.84589  | -3.24640 |
| Cl | -2.60512 | 0.78840  | -0.33606 |
| S  | -0.85655 | 0.46460  | -3.15769 |

**R = t-Bu**

|    |          |          |          |
|----|----------|----------|----------|
| P  | 0.65693  | -0.39556 | 0.82998  |
| C  | 0.65203  | -0.13420 | -0.81147 |
| P  | -0.86477 | -0.14934 | -1.71395 |
| Cl | 2.76904  | -1.40805 | -3.33174 |
| Sn | 1.97127  | 0.62456  | -2.42116 |
| Au | 3.34749  | 2.72612  | -2.45361 |
| Cl | 4.58260  | 4.63345  | -2.37692 |
| C  | 2.40477  | -0.36366 | 1.47642  |
| C  | 2.55698  | -1.70491 | 2.20499  |
| C  | 3.50744  | -0.19321 | 0.45015  |
| C  | 2.43418  | 0.77908  | 2.49788  |
| H  | 1.75893  | -1.86819 | 2.93464  |
| H  | 2.56143  | -2.54609 | 1.50723  |
| H  | 3.50855  | -1.71269 | 2.74560  |
| H  | 3.48242  | 0.79611  | -0.01526 |
| H  | 4.48246  | -0.27720 | 0.94119  |
| H  | 3.47135  | -0.96219 | -0.32655 |
| H  | 3.38966  | 0.76032  | 3.03142  |
| H  | 2.33947  | 1.75470  | 2.01559  |
| H  | 1.63730  | 0.68432  | 3.24080  |
| C  | -1.65410 | -1.81124 | -1.92184 |
| C  | -2.85620 | -1.65237 | -2.85103 |
| C  | -0.60964 | -2.72808 | -2.55916 |
| C  | -2.08810 | -2.36037 | -0.56646 |
| H  | -3.62667 | -1.01177 | -2.41895 |
| H  | -2.56587 | -1.24771 | -3.82245 |
| H  | -3.29342 | -2.64068 | -3.01668 |
| H  | 0.26697  | -2.85918 | -1.92302 |
| H  | -1.06835 | -3.70881 | -2.71208 |
| H  | -0.27267 | -2.35589 | -3.52738 |

|    |          |          |          |
|----|----------|----------|----------|
| H  | -2.51197 | -3.35614 | -0.72296 |
| H  | -1.24856 | -2.46313 | 0.12417  |
| H  | -2.85058 | -1.73938 | -0.09510 |
| Cl | -2.28529 | 0.95169  | -0.76563 |
| S  | -0.39549 | 0.70012  | -3.47181 |

**R = Ph**

|    |          |          |          |
|----|----------|----------|----------|
| P  | 0.72934  | 0.24295  | 1.28727  |
| C  | 0.30736  | -0.22872 | -0.25120 |
| P  | -1.32288 | -0.30300 | -0.87416 |
| Cl | 1.47250  | -2.63777 | -2.54110 |
| Sn | 1.38603  | -0.29935 | -2.16813 |
| Au | 3.18581  | 1.23346  | -3.01349 |
| Cl | 4.84247  | 2.62772  | -3.70620 |
| C  | 2.52471  | 0.09298  | 1.31682  |
| C  | 3.21595  | 1.01038  | 2.11300  |
| C  | 3.24236  | -0.88296 | 0.61726  |
| C  | 4.59993  | 0.99043  | 2.16091  |
| H  | 2.66518  | 1.75463  | 2.67969  |
| C  | 4.62442  | -0.90918 | 0.68177  |
| H  | 2.71741  | -1.64888 | 0.05424  |
| C  | 5.30331  | 0.03420  | 1.44258  |
| H  | 5.13091  | 1.72116  | 2.75942  |
| H  | 5.17443  | -1.66721 | 0.13681  |
| H  | 6.38622  | 0.01742  | 1.48135  |
| C  | -2.11467 | -1.88461 | -0.55233 |
| C  | -2.27707 | -2.79998 | -1.58613 |
| C  | -2.50525 | -2.20859 | 0.74714  |
| C  | -2.84097 | -4.03871 | -1.31926 |
| H  | -1.95903 | -2.54503 | -2.58952 |
| C  | -3.06488 | -3.44657 | 1.00278  |
| H  | -2.37874 | -1.49566 | 1.55418  |
| C  | -3.23368 | -4.36095 | -0.03037 |
| H  | -2.96893 | -4.75252 | -2.12413 |
| H  | -3.37237 | -3.69971 | 2.01046  |
| H  | -3.67341 | -5.33024 | 0.17452  |
| Cl | -2.54051 | 1.03603  | 0.03886  |
| S  | -1.11376 | 0.10043  | -2.82384 |

**R = Mes**

|    |          |          |          |
|----|----------|----------|----------|
| P  | 0.80724  | 0.03700  | 1.90088  |
| C  | 0.25688  | -0.32355 | 0.37246  |
| P  | -1.37427 | -0.25379 | -0.27931 |
| Cl | 1.17200  | -2.24983 | -2.40734 |
| Sn | 1.38471  | -0.06964 | -1.49363 |
| Au | 3.39709  | 1.34374  | -2.01781 |
| Cl | 5.27745  | 2.58849  | -2.36925 |
| C  | 2.60907  | 0.04525  | 1.64748  |
| C  | 3.26814  | 1.28517  | 1.69312  |
| C  | 3.33074  | -1.13888 | 1.42661  |
| C  | 4.63274  | 1.32629  | 1.45264  |
| C  | 4.69860  | -1.04473 | 1.19844  |
| C  | 5.36427  | 0.17504  | 1.18354  |
| H  | 5.13546  | 2.28828  | 1.44581  |
| H  | 5.26162  | -1.95647 | 1.02292  |
| C  | -2.17666 | -1.86914 | -0.42698 |
| C  | -2.77264 | -2.32060 | -1.62783 |
| C  | -2.17576 | -2.70622 | 0.71277  |
| C  | -3.27318 | -3.61565 | -1.66414 |
| C  | -2.69696 | -3.98779 | 0.60424  |
| C  | -3.22901 | -4.47552 | -0.57780 |
| H  | -3.72930 | -3.95806 | -2.58729 |
| H  | -2.69340 | -4.61953 | 1.48697  |
| Cl | -2.64332 | 0.85032  | 0.87660  |
| C  | -1.65877 | -2.31307 | 2.06439  |
| H  | -0.58428 | -2.49630 | 2.14187  |

|   |          |          |          |
|---|----------|----------|----------|
| H | -1.83369 | -1.26709 | 2.31171  |
| H | -2.14952 | -2.91550 | 2.82967  |
| C | -3.74207 | -5.87632 | -0.67946 |
| H | -2.95558 | -6.54249 | -1.04764 |
| H | -4.06538 | -6.25528 | 0.29118  |
| H | -4.57912 | -5.94491 | -1.37622 |
| C | -2.94383 | -1.51532 | -2.88194 |
| H | -3.36592 | -0.52819 | -2.69444 |
| H | -1.99462 | -1.36957 | -3.39985 |
| H | -3.61761 | -2.04547 | -3.55549 |
| C | 2.51383  | 2.56068  | 1.92488  |
| H | 2.00693  | 2.89003  | 1.01218  |
| H | 1.74844  | 2.45099  | 2.70038  |
| H | 3.18857  | 3.36132  | 2.22946  |
| C | 2.67799  | -2.49171 | 1.44947  |
| H | 2.01393  | -2.60180 | 2.31227  |
| H | 2.07844  | -2.67888 | 0.55414  |
| H | 3.43277  | -3.27659 | 1.50932  |
| C | 6.82084  | 0.26440  | 0.85716  |
| H | 6.95266  | 0.73804  | -0.12061 |
| H | 7.35448  | 0.87625  | 1.58829  |
| H | 7.28667  | -0.72128 | 0.82579  |
| S | -1.01853 | 0.79255  | -1.96350 |

**R = Mes\***

|    |          |          |          |
|----|----------|----------|----------|
| P  | -0.04048 | 2.03697  | 1.10579  |
| C  | 0.32779  | 0.58165  | 0.37476  |
| P  | 1.88394  | -0.23138 | 0.17667  |
| Cl | -1.28669 | 0.55868  | -2.81735 |
| C  | 3.61181  | 0.37694  | 0.15466  |
| C  | 4.22666  | 0.49837  | -1.12857 |
| C  | 4.44869  | 0.22310  | 1.29323  |
| C  | 5.52764  | 0.03785  | -1.25527 |
| C  | 5.74929  | -0.22134 | 1.07664  |
| C  | 6.28069  | -0.43025 | -0.18556 |
| H  | 5.98074  | 0.06884  | -2.23819 |
| H  | 6.37172  | -0.39847 | 1.94250  |
| C  | -1.86583 | 2.08226  | 0.92827  |
| C  | -2.44842 | 2.93658  | -0.03846 |
| C  | -2.68239 | 1.17541  | 1.65144  |
| C  | -3.74919 | 2.65792  | -0.44697 |
| C  | -3.96423 | 0.94051  | 1.16837  |
| C  | -4.50050 | 1.61798  | 0.08117  |
| H  | -4.18956 | 3.26912  | -1.21809 |
| H  | -4.57827 | 0.20653  | 1.67222  |
| C  | -1.75610 | 4.20623  | -0.56968 |
| C  | -2.30564 | 0.54808  | 3.01238  |
| C  | -5.88569 | 1.25143  | -0.44050 |
| C  | 4.14882  | 0.70152  | 2.72977  |
| C  | 3.68057  | 1.29575  | -2.33159 |
| C  | 7.65623  | -1.03983 | -0.41956 |
| C  | -3.54908 | 0.51490  | 3.91728  |
| H  | -3.24650 | 0.22293  | 4.92586  |
| H  | -4.03207 | 1.49312  | 3.97487  |
| H  | -4.28779 | -0.21559 | 3.58615  |
| C  | -1.27607 | 1.39482  | 3.75970  |
| H  | -0.28522 | 1.38647  | 3.28857  |
| H  | -1.59699 | 2.43502  | 3.85377  |
| H  | -1.12657 | 0.98875  | 4.76370  |
| C  | -1.78891 | -0.88622 | 2.88670  |
| H  | -2.50747 | -1.52399 | 2.36714  |
| H  | -0.84190 | -0.93101 | 2.34867  |
| H  | -1.62569 | -1.30916 | 3.88247  |
| C  | -6.92138 | 1.42096  | 0.67754  |
| H  | -7.91607 | 1.15942  | 0.30667  |
| H  | -6.70812 | 0.77568  | 1.53178  |

|    |          |          |          |
|----|----------|----------|----------|
| H  | -6.95126 | 2.45440  | 1.03273  |
| C  | -6.30819 | 2.12319  | -1.62021 |
| H  | -7.29125 | 1.80245  | -1.97254 |
| H  | -6.38675 | 3.17835  | -1.34435 |
| H  | -5.61257 | 2.03442  | -2.45835 |
| C  | -5.86961 | -0.21050 | -0.90260 |
| H  | -5.14759 | -0.35788 | -1.70929 |
| H  | -5.60754 | -0.89798 | -0.09627 |
| H  | -6.85720 | -0.49646 | -1.27479 |
| C  | -2.67756 | 5.02123  | -1.48006 |
| H  | -3.60165 | 5.31381  | -0.97664 |
| H  | -2.15850 | 5.93661  | -1.77336 |
| H  | -2.93299 | 4.48221  | -2.39524 |
| C  | -1.40087 | 5.10123  | 0.62664  |
| H  | -2.29427 | 5.35149  | 1.20372  |
| H  | -0.68662 | 4.62437  | 1.30168  |
| H  | -0.94958 | 6.03302  | 0.27418  |
| C  | -0.49321 | 3.91166  | -1.37882 |
| H  | 0.30364  | 3.48414  | -0.76346 |
| H  | -0.69134 | 3.21566  | -2.19453 |
| H  | -0.09747 | 4.84303  | -1.79474 |
| C  | 2.77925  | 1.33992  | 2.91855  |
| H  | 2.59409  | 2.11504  | 2.17193  |
| H  | 1.96266  | 0.62145  | 2.89614  |
| H  | 2.74443  | 1.82318  | 3.89814  |
| C  | 5.16530  | 1.83495  | 2.99030  |
| H  | 4.98076  | 2.26087  | 3.98012  |
| H  | 6.19673  | 1.48296  | 2.96279  |
| H  | 5.05995  | 2.63295  | 2.25145  |
| C  | 4.36340  | -0.38294 | 3.78871  |
| H  | 5.36998  | -0.80261 | 3.74635  |
| H  | 4.23230  | 0.05170  | 4.78316  |
| H  | 3.65199  | -1.20072 | 3.68204  |
| C  | 2.33203  | 1.96090  | -2.09000 |
| H  | 2.14195  | 2.67702  | -2.89300 |
| H  | 1.49559  | 1.26549  | -2.09626 |
| H  | 2.33205  | 2.51802  | -1.14994 |
| C  | 3.63006  | 0.48158  | -3.62583 |
| H  | 2.90107  | -0.32512 | -3.56114 |
| H  | 3.34034  | 1.13442  | -4.45324 |
| H  | 4.60088  | 0.04766  | -3.87375 |
| C  | 4.68120  | 2.45591  | -2.52740 |
| H  | 4.76032  | 3.06330  | -1.62233 |
| H  | 5.68074  | 2.10710  | -2.78830 |
| H  | 4.32716  | 3.09811  | -3.33801 |
| C  | 8.31140  | -1.50351 | 0.87857  |
| H  | 8.51304  | -0.67001 | 1.55636  |
| H  | 7.69412  | -2.23585 | 1.40474  |
| H  | 9.26901  | -1.97830 | 0.65322  |
| C  | 8.57446  | -0.00688 | -1.08404 |
| H  | 8.18820  | 0.31946  | -2.05161 |
| H  | 8.69311  | 0.87699  | -0.45254 |
| H  | 9.56400  | -0.44052 | -1.25127 |
| C  | 7.50254  | -2.25335 | -1.34473 |
| H  | 6.86096  | -3.01286 | -0.89186 |
| H  | 7.06537  | -1.97646 | -2.30606 |
| H  | 8.48005  | -2.70327 | -1.53758 |
| Au | -2.58543 | -2.54766 | -0.35761 |
| Cl | -4.16914 | -4.09620 | 0.19600  |
| Sn | -0.89205 | -0.76372 | -0.88550 |
| Cl | 1.91463  | -1.60689 | 1.70298  |
| S  | 1.55765  | -1.38154 | -1.44588 |

#### Coordination through S atom

##### R= H

|    |          |          |          |
|----|----------|----------|----------|
| P  | 0.77103  | 0.00051  | 1.10259  |
| C  | 0.52617  | -0.17476 | -0.52843 |
| P  | -0.94664 | 0.18602  | -1.36251 |
| Cl | 0.76408  | -2.44009 | -3.03691 |
| Sn | 1.88217  | -0.42855 | -2.37252 |
| Au | -1.80117 | 0.85004  | -4.60613 |
| Cl | -3.28554 | 0.50567  | -6.26074 |
| Cl | -2.42106 | 1.07749  | -0.32654 |
| H  | -1.55759 | -1.00342 | -1.78103 |
| H  | 2.15078  | -0.38235 | 1.13239  |
| S  | -0.29310 | 1.25894  | -2.95635 |

##### R = Me

|    |          |          |          |
|----|----------|----------|----------|
| P  | 0.78405  | 0.03734  | 1.10351  |
| C  | 0.52562  | -0.11062 | -0.52773 |
| P  | -1.00583 | 0.18969  | -1.27971 |
| Cl | 1.19346  | -2.41276 | -3.04228 |
| Sn | 1.88094  | -0.20597 | -2.38377 |
| C  | 2.53956  | -0.43862 | 1.33965  |
| H  | 2.56197  | -1.46419 | 1.72254  |
| H  | 3.13693  | -0.39084 | 0.42794  |
| H  | 2.98343  | 0.20123  | 2.10571  |
| C  | -1.92637 | -1.31476 | -1.58617 |
| H  | -2.17379 | -1.76600 | -0.62322 |
| H  | -2.83262 | -1.07200 | -2.14263 |
| H  | -1.28964 | -1.98350 | -2.16982 |
| Au | -1.92011 | 0.57303  | -4.62329 |
| Cl | -3.38823 | 0.05042  | -6.24858 |
| Cl | -2.29119 | 1.32849  | -0.20401 |
| S  | -0.44559 | 1.15247  | -2.99224 |

##### R = t-Bu

|    |          |          |          |
|----|----------|----------|----------|
| P  | 0.97982  | -0.06260 | 0.74165  |
| C  | 0.69529  | -0.10154 | -0.89682 |
| P  | -0.92642 | 0.14620  | -1.49274 |
| Cl | 1.93319  | -2.06831 | -3.60620 |
| Au | -1.89430 | 0.29087  | -4.99227 |
| Cl | -3.16984 | -0.37348 | -6.72787 |
| S  | -0.57135 | 1.04559  | -3.30326 |
| C  | -2.00509 | -1.36918 | -1.49916 |
| C  | -3.40449 | -1.00769 | -1.98982 |
| C  | -1.36784 | -2.41706 | -2.40679 |
| C  | -2.06957 | -1.88747 | -0.06217 |
| H  | -3.90604 | -0.30377 | -1.32529 |
| H  | -3.39469 | -0.59667 | -3.00202 |
| H  | -3.99425 | -1.92766 | -2.01879 |
| H  | -0.36062 | -2.68710 | -2.08837 |
| H  | -1.99160 | -3.31436 | -2.36840 |
| H  | -1.32159 | -2.08881 | -3.44633 |
| H  | -2.71550 | -2.76953 | -0.06056 |
| H  | -1.09039 | -2.19208 | 0.30996  |
| H  | -2.49775 | -1.15744 | 0.62630  |
| C  | 2.80513  | -0.38575 | 1.01378  |
| C  | 3.31962  | -1.58457 | 0.22858  |
| C  | 3.57555  | 0.88623  | 0.65853  |
| C  | 2.94022  | -0.65693 | 2.51426  |
| H  | 2.76334  | -2.49420 | 0.46710  |
| H  | 3.25825  | -1.44580 | -0.85264 |
| H  | 4.37149  | -1.76139 | 0.47689  |
| H  | 3.19602  | 1.75788  | 1.19892  |
| H  | 4.62912  | 0.76230  | 0.93059  |
| H  | 3.53413  | 1.11021  | -0.41037 |
| H  | 3.99315  | -0.81018 | 2.76884  |

|    |          |          |          |
|----|----------|----------|----------|
| H  | 2.56788  | 0.17927  | 3.11189  |
| H  | 2.39064  | -1.55328 | 2.81376  |
| Sn | 1.98156  | 0.18785  | -2.78995 |
| Cl | -1.97610 | 1.47040  | -0.35360 |

**R = Ph**

|    |          |          |          |
|----|----------|----------|----------|
| P  | 0.74541  | 0.49833  | 0.81017  |
| C  | 0.53679  | -0.09477 | -0.72924 |
| P  | -0.93123 | 0.02774  | -1.64155 |
| Cl | 1.67467  | -2.93408 | -2.48523 |
| Sn | 2.11127  | -0.57285 | -2.30682 |
| Au | -1.73649 | -0.07919 | -5.10257 |
| Cl | -3.19730 | -0.56461 | -6.74908 |
| C  | 2.43731  | -0.00676 | 1.21327  |
| C  | 3.01355  | -1.20374 | 0.77247  |
| C  | 3.18284  | 0.84427  | 2.03275  |
| C  | 4.32014  | -1.51737 | 1.11313  |
| H  | 2.41962  | -1.91824 | 0.20941  |
| C  | 4.49276  | 0.53347  | 2.35980  |
| H  | 2.73573  | 1.76141  | 2.40362  |
| C  | 5.06275  | -0.64490 | 1.89729  |
| H  | 4.75451  | -2.45081 | 0.77427  |
| H  | 5.06919  | 1.20851  | 2.98169  |
| H  | 6.08440  | -0.89194 | 2.16200  |
| C  | -1.93026 | -1.46025 | -1.52381 |
| C  | -2.74208 | -1.63998 | -0.40311 |
| C  | -1.83878 | -2.45263 | -2.49408 |
| C  | -3.46807 | -2.80883 | -0.26723 |
| H  | -2.81652 | -0.86817 | 0.35366  |
| C  | -2.57416 | -3.61841 | -2.34891 |
| H  | -1.19964 | -2.32278 | -3.35722 |
| C  | -3.38691 | -3.79604 | -1.24129 |
| H  | -4.10568 | -2.94617 | 0.59797  |
| H  | -2.51038 | -4.38502 | -3.11135 |
| H  | -3.96405 | -4.70735 | -1.13494 |
| Cl | -2.16290 | 1.50656  | -0.99352 |
| S  | -0.22307 | 0.46183  | -3.49431 |

**R = Mes**

|    |          |          |          |
|----|----------|----------|----------|
| P  | 0.59025  | 0.20907  | 1.20622  |
| C  | 0.34157  | -0.19060 | -0.38560 |
| P  | -1.08163 | -0.04948 | -1.38081 |
| Cl | 1.82373  | -2.69691 | -2.28028 |
| Sn | 2.12255  | -0.35434 | -1.78291 |
| Au | -1.65047 | 1.50611  | -4.58092 |
| Cl | -3.06347 | 2.28514  | -6.15548 |
| C  | 2.38856  | -0.10692 | 1.37191  |
| C  | 2.87412  | -1.41377 | 1.55398  |
| C  | 3.26851  | 0.98910  | 1.40267  |
| C  | 4.24306  | -1.59601 | 1.71531  |
| C  | 4.62651  | 0.75467  | 1.56682  |
| C  | 5.13534  | -0.53089 | 1.71504  |
| H  | 4.62074  | -2.60397 | 1.85854  |
| H  | 5.30630  | 1.60145  | 1.58510  |
| C  | -1.99323 | -1.61301 | -1.49492 |
| C  | -2.62131 | -2.07250 | -0.31196 |
| C  | -2.04458 | -2.40182 | -2.66992 |
| C  | -3.26742 | -3.30125 | -0.33066 |
| C  | -2.71921 | -3.61488 | -2.61339 |
| C  | -3.33646 | -4.08868 | -1.46696 |
| H  | -3.73624 | -3.64697 | 0.58520  |
| H  | -2.75312 | -4.21630 | -3.51572 |
| Cl | -2.44108 | 1.32849  | -0.74421 |
| C  | 2.76288  | 2.39162  | 1.23910  |
| H  | 2.44189  | 2.58625  | 0.21064  |
| H  | 1.89900  | 2.58776  | 1.88231  |

|   |          |          |          |
|---|----------|----------|----------|
| H | 3.53791  | 3.11771  | 1.48645  |
| C | 6.60771  | -0.76128 | 1.86049  |
| H | 7.08005  | -0.86627 | 0.87878  |
| H | 7.09349  | 0.07388  | 2.36808  |
| H | 6.81485  | -1.67387 | 2.42156  |
| C | 1.95657  | -2.59994 | 1.59734  |
| H | 1.08370  | -2.40922 | 2.22878  |
| H | 1.58476  | -2.85887 | 0.60187  |
| H | 2.47642  | -3.47176 | 1.99605  |
| C | -2.68769 | -1.32157 | 0.98522  |
| H | -3.50464 | -0.59651 | 0.97238  |
| H | -2.87665 | -2.02049 | 1.80068  |
| H | -1.77904 | -0.77286 | 1.23042  |
| C | -1.43851 | -2.05308 | -3.99450 |
| H | -1.88518 | -1.15413 | -4.42409 |
| H | -0.36405 | -1.88844 | -3.92523 |
| H | -1.60650 | -2.87238 | -4.69294 |
| C | -4.06708 | -5.39356 | -1.46817 |
| H | -4.20001 | -5.77836 | -0.45624 |
| H | -5.06049 | -5.27500 | -1.91161 |
| H | -3.53682 | -6.14364 | -2.05803 |
| S | -0.18288 | 0.77478  | -3.00244 |

**R = Mes\***

|   |          |          |          |
|---|----------|----------|----------|
| P | 1.94434  | 1.98299  | 0.11734  |
| C | 1.05093  | 0.60619  | -0.16265 |
| P | -0.68441 | 0.43096  | -0.23469 |
| C | 3.66125  | 1.33166  | -0.04149 |
| C | 4.44645  | 1.15658  | 1.12855  |
| C | 4.14398  | 0.85469  | -1.28103 |
| C | 5.52129  | 0.28345  | 1.05970  |
| C | 5.21237  | -0.04476 | -1.26195 |
| C | 5.87708  | -0.39642 | -0.10072 |
| H | 6.10048  | 0.10354  | 1.95327  |
| H | 5.54696  | -0.46227 | -2.20046 |
| C | 3.68602  | 1.36176  | -2.66710 |
| C | 4.20704  | 1.94434  | 2.42979  |
| C | 7.00099  | -1.42619 | -0.06685 |
| C | 2.89237  | 1.56740  | 3.11387  |
| H | 2.01968  | 1.86349  | 2.52631  |
| H | 2.82449  | 0.49227  | 3.28498  |
| H | 2.81521  | 2.08690  | 4.07366  |
| C | 4.21418  | 3.44577  | 2.10922  |
| H | 5.16123  | 3.74084  | 1.65075  |
| H | 3.40731  | 3.73000  | 1.43043  |
| H | 4.08655  | 4.02252  | 3.02950  |
| C | 5.31881  | 1.70432  | 3.45392  |
| H | 5.33494  | 0.67157  | 3.80974  |
| H | 6.30581  | 1.95518  | 3.05819  |
| H | 5.13883  | 2.34404  | 4.32081  |
| C | 2.75861  | 0.37279  | -3.37662 |
| H | 1.79799  | 0.28435  | -2.86760 |
| H | 2.56131  | 0.71165  | -4.39797 |
| H | 3.21099  | -0.62009 | -3.43640 |
| C | 3.01115  | 2.73027  | -2.59357 |
| H | 2.03648  | 2.70571  | -2.09660 |
| H | 3.63902  | 3.46047  | -2.07749 |
| H | 2.82168  | 3.09910  | -3.60526 |
| C | 4.92536  | 1.56576  | -3.55728 |
| H | 5.67345  | 2.18942  | -3.06262 |
| H | 5.39967  | 0.62662  | -3.84379 |
| H | 4.62247  | 2.06436  | -4.48133 |
| C | 7.22362  | -2.08413 | -1.42593 |
| H | 7.54258  | -1.36306 | -2.18314 |
| H | 8.01004  | -2.83766 | -1.34090 |
| H | 6.32211  | -2.58712 | -1.78508 |

|    |          |          |          |
|----|----------|----------|----------|
| C  | 6.64337  | -2.52142 | 0.94530  |
| H  | 6.51789  | -2.11792 | 1.95168  |
| H  | 5.71027  | -3.02006 | 0.67376  |
| H  | 7.43768  | -3.27216 | 0.98081  |
| C  | 8.30764  | -0.74705 | 0.36026  |
| H  | 8.22477  | -0.29558 | 1.35091  |
| H  | 9.11788  | -1.48056 | 0.39551  |
| H  | 8.59009  | 0.03851  | -0.34518 |
| C  | -2.10758 | 1.43852  | 0.29756  |
| C  | -2.75530 | 1.02765  | 1.49650  |
| C  | -2.85713 | 2.18338  | -0.66075 |
| C  | -4.14521 | 0.98768  | 1.48917  |
| C  | -4.23667 | 2.10511  | -0.58525 |
| C  | -4.90963 | 1.40738  | 0.41321  |
| H  | -4.64386 | 0.60704  | 2.36944  |
| H  | -4.81827 | 2.62280  | -1.33775 |
| C  | -2.08637 | 0.82286  | 2.87033  |
| C  | -2.43706 | -0.51324 | 3.52871  |
| C  | -2.65341 | 1.95888  | 3.75011  |
| H  | -2.01588 | -1.35421 | 2.97938  |
| H  | -2.02870 | -0.53322 | 4.54256  |
| H  | -3.51513 | -0.66413 | 3.60485  |
| H  | -2.43278 | 2.93806  | 3.31779  |
| H  | -3.73327 | 1.88190  | 3.87959  |
| H  | -2.18976 | 1.91018  | 4.73899  |
| C  | -2.29521 | 3.24099  | -1.63351 |
| C  | -2.86718 | 4.58494  | -1.13420 |
| C  | -2.75240 | 3.03507  | -3.07978 |
| H  | -2.57159 | 4.77561  | -0.09974 |
| H  | -2.47737 | 5.39605  | -1.75539 |
| H  | -3.95590 | 4.61446  | -1.18458 |
| H  | -2.35865 | 2.11146  | -3.50241 |
| H  | -3.83995 | 3.00614  | -3.16432 |
| H  | -2.39837 | 3.86721  | -3.69423 |
| C  | -6.41778 | 1.22087  | 0.34131  |
| C  | -7.10672 | 2.58957  | 0.40284  |
| C  | -6.94353 | 0.35482  | 1.48293  |
| H  | -6.80503 | 3.23457  | -0.42537 |
| H  | -8.19102 | 2.46201  | 0.34618  |
| H  | -6.87386 | 3.10741  | 1.33692  |
| H  | -6.46938 | -0.62947 | 1.48888  |
| H  | -6.79466 | 0.82474  | 2.45893  |
| H  | -8.01797 | 0.20379  | 1.35648  |
| Cl | 2.49112  | -1.92982 | 1.83995  |
| Cl | -1.02926 | 0.15617  | -2.23898 |
| Au | -2.85606 | -2.30467 | -0.26097 |
| Cl | -4.86191 | -3.12452 | -0.91635 |
| C  | -0.78083 | 3.40394  | -1.59567 |
| H  | -0.41678 | 3.53900  | -0.57462 |
| H  | -0.25047 | 2.57206  | -2.05448 |
| H  | -0.50663 | 4.30023  | -2.15787 |
| C  | -0.57487 | 1.01368  | 2.88054  |
| H  | -0.02595 | 0.19139  | 2.42351  |
| H  | -0.29176 | 1.94992  | 2.39225  |
| H  | -0.23504 | 1.07140  | 3.91751  |
| C  | -6.76408 | 0.52905  | -0.98365 |
| H  | -6.44759 | 1.12175  | -1.84480 |
| H  | -6.28847 | -0.45218 | -1.05227 |
| H  | -7.84640 | 0.39122  | -1.05461 |
| Sn | 1.73187  | -1.58176 | -0.42918 |
| S  | -0.87936 | -1.47260 | 0.50658  |

### Coordination through P(sp<sup>2</sup>) atom

#### R= H

|    |          |          |          |
|----|----------|----------|----------|
| P  | 0.59381  | -0.01685 | 0.91664  |
| C  | 0.34979  | -0.34024 | -0.66914 |
| P  | -1.12799 | -0.28357 | -1.57513 |
| Cl | 1.14536  | -2.79782 | -2.86026 |
| Sn | 1.75828  | -0.49683 | -2.50527 |
| Au | -0.70667 | 0.54308  | 2.59522  |
| Cl | -2.02028 | 1.11462  | 4.33555  |
| Cl | -2.68630 | 0.63378  | -0.68835 |
| H  | -1.61963 | -1.59470 | -1.67692 |
| H  | 1.98811  | -0.14867 | 1.10242  |
| S  | -0.62930 | 0.49814  | -3.32481 |

#### R = Me

|    |          |          |          |
|----|----------|----------|----------|
| P  | 0.67670  | 0.08945  | 0.89451  |
| C  | 0.35579  | -0.23323 | -0.67708 |
| P  | -1.19756 | -0.26362 | -1.45867 |
| Cl | 1.34677  | -2.86718 | -2.62477 |
| Sn | 1.65376  | -0.46628 | -2.57272 |
| C  | 2.45039  | -0.04392 | 1.22374  |
| H  | 2.60646  | -0.85503 | 1.93967  |
| H  | 3.01992  | -0.24110 | 0.31589  |
| H  | 2.79386  | 0.88096  | 1.69234  |
| C  | -1.97259 | -1.86773 | -1.25355 |
| H  | -2.18910 | -2.03394 | -0.19694 |
| H  | -2.89372 | -1.88992 | -1.83756 |
| H  | -1.27046 | -2.61748 | -1.62582 |
| Au | -0.66883 | 0.57942  | 2.56957  |
| Cl | -2.02643 | 1.04571  | 4.31453  |
| Cl | -2.55204 | 1.01624  | -0.66124 |
| S  | -0.81329 | 0.18852  | -3.36127 |

#### R = t-Bu

|    |          |          |          |
|----|----------|----------|----------|
| P  | 0.71399  | 0.19567  | 0.67452  |
| C  | 0.50456  | -0.33114 | -0.86806 |
| P  | -1.05030 | -0.48030 | -1.66250 |
| Cl | 2.22251  | -2.90264 | -2.58075 |
| Sn | 1.87187  | -0.51340 | -2.73860 |
| Au | -0.78868 | 0.93964  | 2.12312  |
| Cl | -2.29829 | 1.69665  | 3.63271  |
| C  | 2.45932  | 0.12592  | 1.29031  |
| C  | 2.80978  | 1.52574  | 1.80119  |
| C  | 2.43707  | -0.86181 | 2.46336  |
| C  | 3.45717  | -0.32904 | 0.23952  |
| H  | 2.83981  | 2.25800  | 0.99092  |
| H  | 2.09632  | 1.87440  | 2.55152  |
| H  | 3.79926  | 1.49484  | 2.26684  |
| H  | 2.21467  | -1.87861 | 2.13160  |
| H  | 3.42475  | -0.86757 | 2.93422  |
| H  | 1.70569  | -0.57616 | 3.22323  |
| H  | 4.44736  | -0.40763 | 0.69877  |
| H  | 3.20854  | -1.31096 | -0.17055 |
| H  | 3.54334  | 0.39415  | -0.57606 |
| C  | -2.02929 | -1.97418 | -1.15992 |
| C  | -1.17486 | -3.20522 | -1.45695 |
| C  | -2.37358 | -1.91394 | 0.32383  |
| C  | -3.30107 | -1.99959 | -2.00679 |
| H  | -0.91783 | -3.28076 | -2.51395 |
| H  | -0.24595 | -3.21249 | -0.88523 |
| H  | -1.75257 | -4.09174 | -1.18061 |
| H  | -2.96541 | -1.03494 | 0.58242  |
| H  | -2.96468 | -2.80028 | 0.57102  |
| H  | -1.48186 | -1.93097 | 0.95279  |
| H  | -3.84479 | -2.91888 | -1.77306 |

|    |          |          |          |
|----|----------|----------|----------|
| H  | -3.95669 | -1.15551 | -1.78848 |
| H  | -3.07630 | -2.00538 | -3.07506 |
| Cl | -2.27590 | 1.08169  | -1.20736 |
| S  | -0.64613 | -0.46486 | -3.61848 |

**R = Ph**

|    |          |          |          |
|----|----------|----------|----------|
| P  | 0.67022  | 0.31288  | 0.52966  |
| C  | 0.47944  | -0.41105 | -0.93036 |
| P  | -1.00228 | -0.63546 | -1.81322 |
| Cl | 1.97098  | -3.34386 | -2.10085 |
| Sn | 1.97771  | -0.96599 | -2.58022 |
| Au | -0.78713 | 1.38888  | 1.79421  |
| Cl | -2.28773 | 2.45621  | 3.10871  |
| C  | 2.35926  | 0.15286  | 1.08805  |
| C  | 2.87478  | 1.14603  | 1.92347  |
| C  | 3.15537  | -0.93908 | 0.72951  |
| C  | 4.18607  | 1.06911  | 2.36036  |
| H  | 2.24637  | 1.97804  | 2.22397  |
| C  | 4.46248  | -1.01232 | 1.17965  |
| H  | 2.74031  | -1.75256 | 0.14286  |
| C  | 4.97978  | -0.00647 | 1.98568  |
| H  | 4.58739  | 1.84645  | 2.99965  |
| H  | 5.07464  | -1.86470 | 0.90959  |
| H  | 6.00362  | -0.06921 | 2.33614  |
| C  | -1.93767 | -2.02894 | -1.16620 |
| C  | -2.71892 | -1.88198 | -0.02015 |
| C  | -1.81316 | -3.27076 | -1.78136 |
| C  | -3.37907 | -2.98069 | 0.50019  |
| H  | -2.82060 | -0.91561 | 0.46028  |
| C  | -2.47947 | -4.36473 | -1.25114 |
| H  | -1.19474 | -3.37877 | -2.66382 |
| C  | -3.26019 | -4.22061 | -0.11499 |
| H  | -3.99100 | -2.86666 | 1.38706  |
| H  | -2.38395 | -5.33203 | -1.72976 |
| H  | -3.78106 | -5.07807 | 0.29557  |
| Cl | -2.26792 | 0.93951  | -1.61063 |
| S  | -0.45100 | -0.85587 | -3.71333 |

**R = Mes**

|    |          |          |          |
|----|----------|----------|----------|
| P  | 0.62123  | 0.44562  | 1.09944  |
| C  | 0.26730  | -0.37507 | -0.27488 |
| P  | -1.15431 | -0.46735 | -1.28030 |
| Cl | 1.46354  | -3.17165 | -1.96139 |
| Sn | 1.89036  | -0.78715 | -1.84984 |
| Au | -0.64524 | 1.60402  | 2.49358  |
| Cl | -1.90782 | 2.78476  | 3.95578  |
| C  | 2.39633  | 0.31282  | 1.39392  |
| C  | 3.20199  | 1.44609  | 1.19156  |
| C  | 2.94930  | -0.89457 | 1.85122  |
| C  | 4.56412  | 1.33976  | 1.43154  |
| C  | 4.31869  | -0.94427 | 2.07954  |
| C  | 5.14195  | 0.15614  | 1.87630  |
| H  | 5.19280  | 2.20919  | 1.26519  |
| H  | 4.75365  | -1.87418 | 2.43264  |
| C  | -2.01382 | -2.05639 | -1.13772 |
| C  | -2.35397 | -2.50571 | 0.15879  |
| C  | -2.35132 | -2.84411 | -2.26261 |
| C  | -2.96489 | -3.74351 | 0.30244  |
| C  | -2.96148 | -4.07284 | -2.04334 |
| C  | -3.26206 | -4.55493 | -0.77962 |
| H  | -3.22484 | -4.07377 | 1.30323  |
| H  | -3.21932 | -4.67297 | -2.90989 |
| Cl | -2.58282 | 0.92027  | -0.81554 |
| C  | 2.62490  | 2.74374  | 0.71196  |
| H  | 2.13552  | 2.63440  | -0.26069 |
| H  | 1.87267  | 3.12886  | 1.40762  |

|   |          |          |          |
|---|----------|----------|----------|
| H | 3.40342  | 3.49985  | 0.60928  |
| C | 2.11194  | -2.11254 | 2.10667  |
| H | 1.24128  | -1.87502 | 2.72560  |
| H | 1.74103  | -2.55493 | 1.17767  |
| H | 2.69320  | -2.87237 | 2.62957  |
| C | 6.60987  | 0.08019  | 2.16023  |
| H | 6.82197  | 0.41923  | 3.17903  |
| H | 6.98107  | -0.94176 | 2.07047  |
| H | 7.18006  | 0.71583  | 1.48053  |
| C | -2.10899 | -1.73681 | 1.42184  |
| H | -2.77587 | -2.09660 | 2.20572  |
| H | -1.08433 | -1.87729 | 1.77347  |
| H | -2.27939 | -0.66577 | 1.31968  |
| C | -2.12654 | -2.47313 | -3.69861 |
| H | -2.50687 | -1.48154 | -3.94251 |
| H | -1.06552 | -2.48541 | -3.95229 |
| H | -2.63590 | -3.19603 | -4.33644 |
| C | -3.88281 | -5.90269 | -0.59293 |
| H | -4.52829 | -6.16425 | -1.43307 |
| H | -3.10742 | -6.67216 | -0.52460 |
| H | -4.47141 | -5.94774 | 0.32469  |
| S | -0.36018 | 0.04660  | -3.04315 |

**R = Mes\***

|    |          |          |          |
|----|----------|----------|----------|
| P  | -1.00028 | 0.88860  | 0.13338  |
| C  | -0.34166 | -0.60568 | 0.32149  |
| P  | 1.29256  | -1.23212 | 0.37080  |
| Cl | -2.25143 | -2.57919 | -2.08331 |
| C  | 2.93506  | -0.48508 | 0.06989  |
| C  | 3.52591  | -0.77735 | -1.19781 |
| C  | 3.78481  | -0.11468 | 1.14865  |
| C  | 4.87799  | -1.08058 | -1.21400 |
| C  | 5.13225  | -0.44826 | 1.04109  |
| C  | 5.68771  | -1.02646 | -0.08720 |
| H  | 5.32295  | -1.35457 | -2.16201 |
| H  | 5.77326  | -0.22453 | 1.88177  |
| C  | -2.80503 | 0.65709  | 0.18757  |
| C  | -3.57688 | 0.66087  | -1.00401 |
| C  | -3.38011 | 0.20413  | 1.40295  |
| C  | -4.79103 | -0.01758 | -0.98070 |
| C  | -4.58129 | -0.49136 | 1.32512  |
| C  | -5.27830 | -0.67051 | 0.14055  |
| H  | -5.36567 | -0.06617 | -1.89032 |
| H  | -4.99746 | -0.89748 | 2.23773  |
| C  | -3.20765 | 1.44217  | -2.27915 |
| C  | -2.86591 | 0.50706  | 2.82758  |
| C  | -6.54646 | -1.51669 | 0.11806  |
| C  | 3.44540  | 0.80539  | 2.34285  |
| C  | 2.87956  | -0.58808 | -2.58753 |
| C  | 7.13563  | -1.49358 | -0.15627 |
| C  | -4.05274 | 1.01580  | 3.66764  |
| H  | -3.68933 | 1.31975  | 4.65236  |
| H  | -4.52544 | 1.88142  | 3.19785  |
| H  | -4.81879 | 0.25738  | 3.82806  |
| C  | -1.82387 | 1.62165  | 2.89080  |
| H  | -0.84471 | 1.32020  | 2.51558  |
| H  | -2.14667 | 2.51593  | 2.35215  |
| H  | -1.66559 | 1.90461  | 3.93492  |
| C  | -2.30122 | -0.74960 | 3.49451  |
| H  | -3.03046 | -1.56293 | 3.49428  |
| H  | -1.40079 | -1.09931 | 2.98643  |
| H  | -2.03708 | -0.53531 | 4.53410  |
| C  | -7.58525 | -0.91908 | 1.07416  |
| H  | -8.49572 | -1.52448 | 1.06391  |
| H  | -7.22124 | -0.88518 | 2.10307  |
| H  | -7.85061 | 0.09874  | 0.77781  |



|    |          |          |          |
|----|----------|----------|----------|
| C  | -7.16457 | -1.59743 | -1.27517 |
| H  | -8.05045 | -2.23603 | -1.24237 |
| H  | -7.48127 | -0.61668 | -1.63920 |
| H  | -6.47102 | -2.02910 | -2.00071 |
| C  | -6.19529 | -2.93966 | 0.57005  |
| H  | -5.46001 | -3.39064 | -0.10074 |
| H  | -5.78286 | -2.95330 | 1.58128  |
| H  | -7.09115 | -3.56662 | 0.56631  |
| C  | -4.26566 | 1.28635  | -3.37572 |
| H  | -5.24971 | 1.63868  | -3.05842 |
| H  | -3.96487 | 1.89322  | -4.23235 |
| H  | -4.35269 | 0.25276  | -3.71906 |
| C  | -3.15654 | 2.93405  | -1.92175 |
| H  | -4.12129 | 3.27221  | -1.53520 |
| H  | -2.39766 | 3.15481  | -1.16777 |
| H  | -2.91740 | 3.52439  | -2.81015 |
| C  | -1.88464 | 0.99964  | -2.90612 |
| H  | -1.01748 | 1.23323  | -2.28620 |
| H  | -1.87981 | -0.07175 | -3.10882 |
| H  | -1.73380 | 1.53864  | -3.84571 |
| C  | 2.00647  | 1.29977  | 2.40734  |
| H  | 1.68444  | 1.69479  | 1.44081  |
| H  | 1.30067  | 0.54366  | 2.74001  |
| H  | 1.94957  | 2.12757  | 3.11806  |
| C  | 4.29401  | 2.07656  | 2.11422  |
| H  | 4.09566  | 2.78773  | 2.92032  |
| H  | 5.36382  | 1.86682  | 2.10478  |
| H  | 4.03052  | 2.55841  | 1.16993  |
| C  | 3.83598  | 0.19981  | 3.69410  |
| H  | 4.89803  | -0.04636 | 3.74484  |
| H  | 3.63206  | 0.92540  | 4.48591  |
| H  | 3.26867  | -0.70517 | 3.91062  |
| C  | 1.43700  | -0.09960 | -2.57385 |
| H  | 1.16542  | 0.21288  | -3.58506 |
| H  | 0.72173  | -0.86584 | -2.28082 |
| H  | 1.32291  | 0.77493  | -1.92725 |
| C  | 2.97928  | -1.83823 | -3.46483 |
| H  | 2.39534  | -2.66015 | -3.05107 |
| H  | 2.58973  | -1.61254 | -4.46097 |
| H  | 4.01040  | -2.17628 | -3.58494 |
| C  | 3.68832  | 0.54696  | -3.25292 |
| H  | 3.63855  | 1.46323  | -2.65981 |
| H  | 4.73860  | 0.28764  | -3.38973 |
| H  | 3.26282  | 0.75774  | -4.23753 |
| C  | 7.84716  | -1.37308 | 1.18866  |
| H  | 7.92893  | -0.33378 | 1.51690  |
| H  | 7.33694  | -1.94298 | 1.96920  |
| H  | 8.86217  | -1.76717 | 1.09969  |
| C  | 7.90082  | -0.65354 | -1.18600 |
| H  | 7.47325  | -0.74674 | -2.18617 |
| H  | 7.89215  | 0.40457  | -0.91358 |
| H  | 8.94199  | -0.98338 | -1.23770 |
| C  | 7.15695  | -2.96606 | -0.58422 |
| H  | 6.62755  | -3.59159 | 0.13841  |
| H  | 6.68692  | -3.11077 | -1.55893 |
| H  | 8.18861  | -3.32158 | -0.65270 |
| Sn | -1.41172 | -2.68182 | 0.19175  |
| Cl | 1.42440  | -1.88252 | 2.33001  |
| Au | 0.05845  | 2.82386  | -0.19869 |
| Cl | 1.18131  | 4.77063  | -0.52557 |
| S  | 1.12760  | -2.95358 | -0.63341 |

### Coordination through $\pi(\text{C}=\text{P})$ bond

#### R = H

|    |          |          |          |
|----|----------|----------|----------|
| P  | 0.62401  | 0.05020  | 1.09973  |
| C  | 0.46791  | 0.01424  | -0.61979 |
| P  | -1.01128 | -0.22261 | -1.51751 |
| Cl | 1.35983  | -2.73231 | -2.41030 |
| Sn | 1.84102  | -0.36422 | -2.47846 |
| Au | 0.77309  | 2.08405  | -0.12569 |
| Cl | 1.10571  | 4.30391  | -0.20219 |
| Cl | -2.68857 | 0.59476  | -0.73606 |
| H  | 2.03874  | -0.14338 | 1.16367  |
| H  | -1.32860 | -1.58731 | -1.42915 |
| S  | -0.62152 | 0.36211  | -3.36729 |

#### R = Me

|    |          |          |          |
|----|----------|----------|----------|
| P  | 0.58559  | 0.12859  | 1.04171  |
| C  | 0.40415  | 0.09801  | -0.67203 |
| P  | -1.09927 | -0.17934 | -1.52653 |
| Cl | 1.68782  | -2.66959 | -2.30531 |
| Sn | 1.79377  | -0.24993 | -2.51662 |
| C  | 2.35887  | -0.25382 | 1.31113  |
| H  | 2.42366  | -1.32609 | 1.52438  |
| H  | 2.99702  | -0.02396 | 0.45767  |
| H  | 2.71196  | 0.28540  | 2.19235  |
| C  | -1.67319 | -1.85170 | -1.21899 |
| H  | -1.92733 | -1.96132 | -0.16344 |
| H  | -2.55101 | -2.03639 | -1.83940 |
| H  | -0.86634 | -2.53446 | -1.49587 |
| Au | 0.71098  | 2.17393  | -0.18644 |
| Cl | 1.06242  | 4.39592  | -0.19583 |
| Cl | -2.66339 | 0.95439  | -0.88367 |
| S  | -0.68542 | 0.16775  | -3.44253 |

#### R = *t*-Bu

|    |          |          |          |
|----|----------|----------|----------|
| P  | 1.05103  | 0.38920  | 1.16301  |
| C  | 0.64255  | 0.10069  | -0.49036 |
| P  | -1.01626 | -0.21940 | -1.00987 |
| Cl | 2.16078  | -2.58166 | -2.36507 |
| Sn | 1.69214  | -0.20687 | -2.56920 |
| Au | 1.01795  | 2.23934  | -0.34656 |
| Cl | 1.42175  | 4.43340  | -0.65650 |
| C  | 2.86962  | 0.04345  | 1.42755  |
| C  | 3.75812  | 0.04043  | 0.19755  |
| C  | 3.34240  | 1.09661  | 2.43138  |
| C  | 2.87676  | -1.34223 | 2.08611  |
| H  | 3.49853  | -0.77317 | -0.48493 |
| H  | 3.72354  | 0.99445  | -0.33491 |
| H  | 4.79766  | -0.12565 | 0.49984  |
| H  | 2.69690  | 1.13713  | 3.31327  |
| H  | 4.35343  | 0.84954  | 2.76915  |
| H  | 3.36935  | 2.09374  | 1.98541  |
| H  | 3.89507  | -1.57851 | 2.41074  |
| H  | 2.23312  | -1.38112 | 2.96979  |
| H  | 2.55961  | -2.12096 | 1.38794  |
| C  | -1.76619 | -1.75162 | -0.27334 |
| C  | -0.83282 | -2.92368 | -0.56634 |
| C  | -1.95820 | -1.58862 | 1.23139  |
| C  | -3.11440 | -1.97716 | -0.95770 |
| H  | -0.66615 | -3.06031 | -1.63502 |
| H  | 0.14153  | -2.80835 | -0.09002 |
| H  | -1.29700 | -3.83294 | -0.17385 |
| H  | -2.64627 | -0.77866 | 1.47468  |
| H  | -2.37982 | -2.51957 | 1.62091  |
| H  | -1.01662 | -1.40886 | 1.75381  |
| H  | -3.54467 | -2.90112 | -0.56175 |

|    |          |          |          |
|----|----------|----------|----------|
| H  | -3.81688 | -1.16618 | -0.75914 |
| H  | -3.00497 | -2.09148 | -2.03734 |
| Cl | -2.31071 | 1.24706  | -0.40842 |
| S  | -0.95013 | -0.27852 | -3.00273 |

**R = Ph**

|    |          |          |          |
|----|----------|----------|----------|
| P  | 0.52468  | 0.33572  | 0.96693  |
| C  | 0.30236  | 0.20980  | -0.73874 |
| P  | -1.22865 | -0.04922 | -1.54817 |
| Cl | 1.67097  | -2.35885 | -2.82472 |
| Sn | 1.64637  | 0.06559  | -2.64839 |
| Au | 0.63862  | 2.32150  | -0.36122 |
| Cl | 1.00198  | 4.54059  | -0.49289 |
| C  | 2.28079  | -0.03244 | 1.22766  |
| C  | 2.92988  | 0.62900  | 2.27305  |
| C  | 2.96727  | -1.00492 | 0.49824  |
| C  | 4.25859  | 0.35785  | 2.55054  |
| H  | 2.39595  | 1.37087  | 2.85861  |
| C  | 4.29299  | -1.28415 | 0.79213  |
| H  | 2.46011  | -1.57025 | -0.27699 |
| C  | 4.94124  | -0.59774 | 1.80914  |
| H  | 4.76247  | 0.88956  | 3.34925  |
| H  | 4.81804  | -2.04405 | 0.22493  |
| H  | 5.97942  | -0.81507 | 2.03262  |
| C  | -1.79232 | -1.73847 | -1.29329 |
| C  | -1.85377 | -2.62229 | -2.36355 |
| C  | -2.14926 | -2.15585 | -0.01117 |
| C  | -2.27785 | -3.92543 | -2.15060 |
| H  | -1.56207 | -2.29192 | -3.35253 |
| C  | -2.56707 | -3.45810 | 0.19240  |
| H  | -2.10947 | -1.46482 | 0.82391  |
| C  | -2.63212 | -4.34238 | -0.87788 |
| H  | -2.32389 | -4.61585 | -2.98423 |
| H  | -2.84554 | -3.78448 | 1.18743  |
| H  | -2.96055 | -5.36248 | -0.71473 |
| Cl | -2.74673 | 1.06289  | -0.76109 |
| S  | -0.90479 | 0.41835  | -3.45300 |

**R = Mes**

|    |          |          |          |
|----|----------|----------|----------|
| P  | 0.50200  | 0.36222  | 1.39401  |
| C  | 0.15317  | 0.19637  | -0.29419 |
| P  | -1.30029 | -0.01765 | -1.25737 |
| Cl | 1.65696  | -2.02000 | -2.76453 |
| Sn | 1.69079  | 0.31241  | -2.06105 |
| Au | 0.28913  | 2.34014  | 0.07289  |
| Cl | 0.38778  | 4.59783  | -0.02264 |
| C  | 2.30462  | 0.05665  | 1.46548  |
| C  | 3.18259  | 1.03894  | 1.95435  |
| C  | 2.78742  | -1.23628 | 1.17218  |
| C  | 4.54053  | 0.74865  | 2.02255  |
| C  | 4.15264  | -1.47159 | 1.25763  |
| C  | 5.05097  | -0.48712 | 1.65321  |
| H  | 5.21730  | 1.51588  | 2.38693  |
| H  | 4.52229  | -2.46640 | 1.02801  |
| C  | -1.83113 | -1.75185 | -1.32546 |
| C  | -1.99713 | -2.45560 | -2.54358 |
| C  | -2.08963 | -2.40862 | -0.10134 |
| C  | -2.33425 | -3.80100 | -2.48207 |
| C  | -2.42538 | -3.75675 | -0.11655 |
| C  | -2.53101 | -4.48146 | -1.28996 |
| H  | -2.45777 | -4.33550 | -3.41832 |
| H  | -2.62376 | -4.24623 | 0.83212  |
| Cl | -2.96873 | 0.97253  | -0.56580 |
| C  | 2.71494  | 2.38724  | 2.41333  |
| H  | 2.61651  | 3.09337  | 1.58344  |
| H  | 1.74021  | 2.34030  | 2.90626  |

|   |          |          |          |
|---|----------|----------|----------|
| H | 3.42705  | 2.81218  | 3.12251  |
| C | 1.87584  | -2.39047 | 0.86881  |
| H | 1.14486  | -2.52759 | 1.67236  |
| H | 1.32600  | -2.27185 | -0.06575 |
| H | 2.45128  | -3.31306 | 0.79036  |
| C | 6.52226  | -0.76007 | 1.69157  |
| H | 6.72902  | -1.79299 | 1.97800  |
| H | 6.96825  | -0.60107 | 0.70474  |
| H | 7.03295  | -0.09817 | 2.39272  |
| C | -2.05037 | -1.76737 | 1.25458  |
| H | -1.08308 | -1.92979 | 1.73758  |
| H | -2.23960 | -0.69736 | 1.24986  |
| H | -2.80621 | -2.22784 | 1.89305  |
| C | -1.86909 | -1.87630 | -3.92120 |
| H | -2.47226 | -0.97852 | -4.05388 |
| H | -0.83575 | -1.61465 | -4.15084 |
| H | -2.20045 | -2.61712 | -4.64944 |
| C | -2.85322 | -5.94191 | -1.27975 |
| H | -3.52327 | -6.20686 | -2.09990 |
| H | -1.94108 | -6.53412 | -1.40205 |
| H | -3.31936 | -6.24240 | -0.34041 |
| S | -0.76761 | 0.91291  | -2.94687 |

**R = Mes\***

|    |          |          |          |
|----|----------|----------|----------|
| P  | 0.66143  | 0.18855  | 1.11861  |
| C  | 0.40591  | 0.08804  | -0.60119 |
| P  | -1.09520 | -0.09580 | -1.57733 |
| Cl | 2.90877  | -1.40482 | -3.30886 |
| Au | 0.45175  | 2.24297  | -0.14653 |
| Cl | 0.37464  | 4.50963  | -0.23726 |
| C  | 2.50311  | 0.05104  | 1.23777  |
| C  | 3.16932  | -1.11145 | 0.75615  |
| C  | 3.28844  | 1.16191  | 1.63273  |
| C  | 4.48249  | -0.98209 | 0.32989  |
| C  | 4.60564  | 1.21839  | 1.17021  |
| C  | 5.19986  | 0.20517  | 0.44004  |
| H  | 4.97581  | -1.85236 | -0.08238 |
| H  | 5.18588  | 2.09822  | 1.40902  |
| C  | 2.92116  | 2.23722  | 2.67736  |
| C  | 2.65929  | -2.55299 | 0.94983  |
| C  | 6.59726  | 0.31708  | -0.15800 |
| C  | 3.85706  | 1.97231  | 3.87486  |
| H  | 3.69752  | 0.97103  | 4.28341  |
| H  | 4.90888  | 2.05916  | 3.59986  |
| H  | 3.65246  | 2.70040  | 4.66452  |
| C  | 3.17257  | 3.65894  | 2.16709  |
| H  | 2.54052  | 3.90150  | 1.31222  |
| H  | 2.94427  | 4.37497  | 2.96130  |
| H  | 4.21308  | 3.81609  | 1.87861  |
| C  | 1.50449  | 2.16969  | 3.23944  |
| H  | 1.43413  | 2.85517  | 4.08831  |
| H  | 0.74372  | 2.48637  | 2.52386  |
| H  | 1.25215  | 1.17153  | 3.60592  |
| C  | 2.98426  | -3.46471 | -0.23570 |
| H  | 2.58796  | -3.06908 | -1.16968 |
| H  | 4.05809  | -3.60749 | -0.36496 |
| H  | 2.55138  | -4.45358 | -0.06184 |
| C  | 3.41496  | -3.07571 | 2.18741  |
| H  | 4.49483  | -3.05263 | 2.03179  |
| H  | 3.18870  | -2.47301 | 3.07077  |
| H  | 3.11960  | -4.10913 | 2.39203  |
| C  | 1.17481  | -2.69195 | 1.26290  |
| H  | 0.87294  | -2.08687 | 2.12541  |
| H  | 0.54354  | -2.44036 | 0.41263  |
| H  | 0.96463  | -3.73185 | 1.52854  |
| C  | 7.23976  | 1.67271  | 0.12256  |

|    |          |          |          |
|----|----------|----------|----------|
| H  | 6.64253  | 2.49539  | -0.27822 |
| H  | 7.38717  | 1.84207  | 1.19254  |
| H  | 8.22182  | 1.71518  | -0.35435 |
| C  | 6.49220  | 0.13524  | -1.67715 |
| H  | 7.48630  | 0.17989  | -2.13091 |
| H  | 6.03916  | -0.82170 | -1.94296 |
| H  | 5.88051  | 0.92344  | -2.12315 |
| C  | 7.50515  | -0.77345 | 0.42266  |
| H  | 7.58409  | -0.68127 | 1.50889  |
| H  | 7.13798  | -1.77578 | 0.19423  |
| H  | 8.50982  | -0.68644 | 0.00007  |
| C  | -2.33647 | -1.47602 | -1.65964 |
| C  | -2.31372 | -2.31380 | -2.81639 |
| C  | -3.56765 | -1.35349 | -0.95825 |
| C  | -3.52220 | -2.56862 | -3.44521 |
| C  | -1.12055 | -3.16179 | -3.29610 |
| C  | -4.73736 | -1.67671 | -1.63892 |
| C  | -3.74118 | -1.09764 | 0.55092  |
| C  | -4.75022 | -2.17242 | -2.93214 |
| H  | -3.49792 | -3.13784 | -4.36620 |
| C  | -0.67046 | -2.86163 | -4.72705 |
| C  | -1.60091 | -4.62921 | -3.25629 |
| C  | 0.05219  | -3.10220 | -2.33280 |
| H  | -5.67591 | -1.53089 | -1.12307 |
| C  | -2.45091 | -0.79007 | 1.29138  |
| C  | -4.24998 | -2.43947 | 1.11925  |
| C  | -4.77289 | -0.01459 | 0.87670  |
| C  | -6.02800 | -2.38509 | -3.73205 |
| H  | 0.04533  | -3.62278 | -5.04799 |
| H  | -1.51405 | -2.88210 | -5.42123 |
| H  | -0.18539 | -1.89149 | -4.80399 |
| H  | -2.35754 | -4.84577 | -4.01112 |
| H  | -0.74587 | -5.28281 | -3.44849 |
| H  | -2.01292 | -4.88584 | -2.27735 |
| H  | 0.49809  | -2.11347 | -2.25427 |
| H  | -0.25307 | -3.44098 | -1.34022 |
| H  | 0.84750  | -3.76116 | -2.68564 |
| H  | -1.67298 | -1.52063 | 1.05884  |
| H  | -2.07600 | 0.21076  | 1.08738  |
| H  | -2.62873 | -0.83950 | 2.36842  |
| H  | -4.36949 | -2.35032 | 2.20255  |
| H  | -5.21210 | -2.72743 | 0.69395  |
| H  | -3.53790 | -3.24401 | 0.91954  |
| H  | -5.75612 | -0.23825 | 0.45986  |
| H  | -4.88868 | 0.05671  | 1.96140  |
| H  | -4.46091 | 0.96169  | 0.50685  |
| C  | -7.26224 | -1.86958 | -2.99691 |
| C  | -6.22130 | -3.87987 | -4.01451 |
| C  | -5.90410 | -1.62885 | -5.06045 |
| H  | -7.44564 | -2.41895 | -2.06991 |
| H  | -7.17608 | -0.80685 | -2.75747 |
| H  | -8.14306 | -1.99691 | -3.63048 |
| H  | -5.39417 | -4.29521 | -4.59342 |
| H  | -6.30038 | -4.44798 | -3.08437 |
| H  | -7.13932 | -4.03598 | -4.58753 |
| H  | -5.77674 | -0.55718 | -4.89057 |
| H  | -5.05112 | -1.97792 | -5.64573 |
| H  | -6.80628 | -1.77489 | -5.66061 |
| Sn | 1.97249  | 0.62369  | -2.30798 |
| Cl | -2.41017 | 1.45207  | -1.17589 |
| S  | -0.43424 | 0.33185  | -3.41829 |

**[R-P=C(Sn(II)Cl)-P(S)MeR](AuCl)**

**Coordination through Sn(II) atom**

**R= H**

|    |          |          |          |
|----|----------|----------|----------|
| P  | 0.70147  | 0.42588  | 0.92033  |
| C  | 0.47567  | 0.01864  | -0.67262 |
| P  | -1.09851 | -0.09488 | -1.46136 |
| Cl | 1.62089  | -2.37247 | -2.85110 |
| Sn | 1.72065  | -0.04128 | -2.49715 |
| C  | -2.45270 | 0.78026  | -0.66791 |
| H  | -3.36789 | 0.62501  | -1.24189 |
| H  | -2.58722 | 0.39806  | 0.34667  |
| H  | -2.21706 | 1.84443  | -0.63563 |
| Au | 3.66871  | 1.41962  | -3.09088 |
| Cl | 5.42494  | 2.78467  | -3.54438 |
| H  | 2.12918  | 0.47845  | 0.91646  |
| H  | -1.49529 | -1.44709 | -1.44295 |
| S  | -0.69990 | 0.52727  | -3.32842 |

**R = Me**

|    |          |          |          |
|----|----------|----------|----------|
| P  | 0.45410  | 0.60323  | 0.29595  |
| C  | 0.14044  | 0.33319  | -1.30886 |
| P  | -1.47626 | 0.02823  | -1.94769 |
| Cl | 1.57006  | -1.66999 | -3.75170 |
| Sn | 1.18277  | 0.61112  | -3.23028 |
| S  | -1.32650 | 0.73461  | -3.83830 |
| C  | 2.25316  | 0.92572  | 0.38765  |
| H  | 2.74099  | 0.02598  | 0.77610  |
| H  | 2.69943  | 1.19090  | -0.57190 |
| H  | 2.43316  | 1.72732  | 1.10763  |
| C  | -1.83022 | -1.73673 | -1.92943 |
| H  | -1.89535 | -2.08862 | -0.89752 |
| H  | -2.77107 | -1.92452 | -2.45011 |
| H  | -1.01859 | -2.25187 | -2.44575 |
| C  | -2.80392 | 0.83420  | -1.03612 |
| H  | -3.75875 | 0.61860  | -1.51920 |
| H  | -2.82118 | 0.46448  | -0.00849 |
| H  | -2.63184 | 1.91040  | -1.03590 |
| Au | 2.79738  | 2.42712  | -3.85504 |
| Cl | 4.26766  | 4.10210  | -4.30482 |

**R = *t*-Bu**

|    |          |          |          |
|----|----------|----------|----------|
| P  | 0.65225  | -0.41375 | 0.81051  |
| C  | 0.64018  | -0.12469 | -0.82441 |
| P  | -0.90739 | -0.10636 | -1.70453 |
| Cl | 2.78357  | -1.39772 | -3.33912 |
| Sn | 1.95142  | 0.62927  | -2.43878 |
| Au | 3.31105  | 2.74343  | -2.43981 |
| Cl | 4.50820  | 4.67723  | -2.32583 |
| C  | 2.39699  | -0.37400 | 1.47065  |
| C  | 2.56383  | -1.72019 | 2.18537  |
| C  | 3.49755  | -0.18175 | 0.44583  |
| C  | 2.41527  | 0.75842  | 2.50287  |
| H  | 1.76759  | -1.89871 | 2.91346  |
| H  | 2.57505  | -2.55383 | 1.47872  |
| H  | 3.51595  | -1.72529 | 2.72515  |
| H  | 3.45912  | 0.80969  | -0.01378 |
| H  | 4.47352  | -0.25745 | 0.93652  |
| H  | 3.47028  | -0.94504 | -0.33670 |
| H  | 3.36923  | 0.74308  | 3.03932  |
| H  | 2.31406  | 1.73768  | 2.02925  |
| H  | 1.61711  | 0.64992  | 3.24272  |
| C  | -1.66430 | -1.78413 | -1.92609 |
| C  | -2.82614 | -1.65323 | -2.91126 |
| C  | -0.60390 | -2.72305 | -2.49507 |

|   |          |          |          |
|---|----------|----------|----------|
| C | -2.16620 | -2.30353 | -0.58042 |
| H | -3.62612 | -1.01382 | -2.53123 |
| H | -2.49510 | -1.26441 | -3.87601 |
| H | -3.25282 | -2.64617 | -3.07809 |
| H | 0.23438  | -2.85582 | -1.80957 |
| H | -1.06127 | -3.70131 | -2.66751 |
| H | -0.20693 | -2.36106 | -3.44467 |
| H | -2.54400 | -3.32023 | -0.72038 |
| H | -1.37181 | -2.34718 | 0.16818  |
| H | -2.98524 | -1.70144 | -0.18195 |
| C | -2.12068 | 0.94010  | -0.87005 |
| H | -3.04342 | 0.98611  | -1.44958 |
| H | -2.32376 | 0.55629  | 0.13086  |
| H | -1.69688 | 1.94172  | -0.79472 |
| S | -0.39620 | 0.70662  | -3.49115 |

**R = Ph**

|    |          |          |          |
|----|----------|----------|----------|
| P  | 0.69305  | 0.16473  | 1.08386  |
| C  | 0.37887  | -0.23995 | -0.49701 |
| P  | -1.24158 | -0.28530 | -1.19168 |
| Cl | 1.69136  | -2.62623 | -2.71661 |
| Sn | 1.55204  | -0.28668 | -2.35412 |
| Au | 3.38058  | 1.26559  | -3.09714 |
| Cl | 5.04647  | 2.69681  | -3.69687 |
| C  | 2.48658  | 0.05763  | 1.24014  |
| C  | 3.10069  | 0.95581  | 2.11642  |
| C  | 3.27113  | -0.87599 | 0.55637  |
| C  | 4.47811  | 0.95930  | 2.26165  |
| H  | 2.49622  | 1.66706  | 2.67069  |
| C  | 4.64598  | -0.87843 | 0.71614  |
| H  | 2.80305  | -1.62731 | -0.07249 |
| C  | 5.25029  | 0.04567  | 1.55864  |
| H  | 4.95033  | 1.67533  | 2.92393  |
| H  | 5.24834  | -1.60318 | 0.18131  |
| H  | 6.32801  | 0.04740  | 1.67292  |
| C  | -2.00513 | -1.90242 | -0.94347 |
| C  | -2.28554 | -2.73222 | -2.02211 |
| C  | -2.30417 | -2.31692 | 0.35446  |
| C  | -2.87740 | -3.96769 | -1.80391 |
| H  | -2.03063 | -2.41253 | -3.02563 |
| C  | -2.89444 | -3.55042 | 0.56495  |
| H  | -2.06310 | -1.68786 | 1.20553  |
| C  | -3.18318 | -4.37502 | -0.51521 |
| H  | -3.09238 | -4.61487 | -2.64590 |
| H  | -3.12425 | -3.87264 | 1.57375  |
| H  | -3.64194 | -5.34266 | -0.34758 |
| C  | -2.36913 | 0.91946  | -0.46421 |
| H  | -3.33100 | 0.86068  | -0.97595 |
| H  | -2.50826 | 0.70778  | 0.59766  |
| H  | -1.94348 | 1.91552  | -0.58765 |
| S  | -0.89584 | 0.11262  | -3.14086 |

**R = Mes**

|    |          |          |          |
|----|----------|----------|----------|
| P  | 0.77635  | 0.04693  | 1.52346  |
| C  | 0.50252  | -0.57054 | 0.00099  |
| P  | -1.07366 | -0.55135 | -0.81922 |
| Cl | 1.81368  | -2.90783 | -2.21147 |
| Sn | 1.85890  | -0.58303 | -1.71322 |
| Au | 3.93220  | 0.76847  | -2.15450 |
| Cl | 5.83941  | 2.00320  | -2.40703 |
| C  | 2.59097  | 0.18370  | 1.57382  |
| C  | 3.14697  | 1.47152  | 1.48317  |
| C  | 3.41983  | -0.93959 | 1.70241  |
| C  | 4.52595  | 1.60465  | 1.46123  |
| C  | 4.79755  | -0.75347 | 1.68380  |
| C  | 5.37109  | 0.50293  | 1.54041  |

|   |          |          |          |
|---|----------|----------|----------|
| H | 4.95545  | 2.59529  | 1.34969  |
| H | 5.44237  | -1.62229 | 1.77732  |
| C | -2.02646 | -2.09598 | -0.94333 |
| C | -3.10822 | -2.11946 | -1.85079 |
| C | -1.75652 | -3.22982 | -0.14995 |
| C | -3.89059 | -3.26490 | -1.93084 |
| C | -2.57151 | -4.34645 | -0.28455 |
| C | -3.64086 | -4.39229 | -1.16571 |
| H | -4.72282 | -3.27069 | -2.62795 |
| H | -2.35623 | -5.21434 | 0.33058  |
| C | -2.16679 | 0.62558  | 0.01439  |
| H | -3.15672 | 0.63989  | -0.43806 |
| H | -2.25977 | 0.31394  | 1.05784  |
| H | -1.71744 | 1.61779  | -0.02989 |
| C | -0.63552 | -3.32422 | 0.83948  |
| H | 0.33148  | -3.16481 | 0.36114  |
| H | -0.72964 | -2.59151 | 1.64338  |
| H | -0.62820 | -4.31620 | 1.29152  |
| C | -3.46684 | -1.00678 | -2.79472 |
| H | -3.34082 | -0.00553 | -2.38511 |
| H | -2.84444 | -1.05241 | -3.69190 |
| H | -4.50839 | -1.10808 | -3.10222 |
| C | -4.47664 | -5.62551 | -1.30391 |
| H | -4.56688 | -6.15411 | -0.35335 |
| H | -5.47856 | -5.39040 | -1.66617 |
| H | -4.02172 | -6.31708 | -2.01979 |
| C | 2.86852  | -2.32743 | 1.85456  |
| H | 1.95686  | -2.34210 | 2.45800  |
| H | 2.62390  | -2.77385 | 0.88567  |
| H | 3.59985  | -2.97821 | 2.33609  |
| C | 2.28189  | 2.68907  | 1.34207  |
| H | 1.41648  | 2.65834  | 2.01232  |
| H | 2.84754  | 3.59422  | 1.56559  |
| H | 1.90110  | 2.78544  | 0.32013  |
| C | 6.85249  | 0.67726  | 1.43620  |
| H | 7.11979  | 0.94880  | 0.41009  |
| H | 7.20525  | 1.48021  | 2.08766  |
| H | 7.38400  | -0.23875 | 1.69724  |
| S | -0.44548 | 0.12023  | -2.63956 |

**R = Mes\***

|    |          |          |          |
|----|----------|----------|----------|
| P  | -0.04215 | 1.99054  | 1.13930  |
| C  | 0.34632  | 0.55679  | 0.38481  |
| P  | 1.90813  | -0.29273 | 0.23956  |
| Cl | -1.26433 | 0.55788  | -2.85119 |
| C  | 3.63342  | 0.34685  | 0.21195  |
| C  | 4.26994  | 0.50118  | -1.05422 |
| C  | 4.45813  | 0.15984  | 1.35472  |
| C  | 5.57625  | 0.04967  | -1.17491 |
| C  | 5.76302  | -0.27899 | 1.14979  |
| C  | 6.31614  | -0.44662 | -0.10967 |
| H  | 6.04169  | 0.10664  | -2.15097 |
| H  | 6.37279  | -0.47946 | 2.01992  |
| C  | -1.86885 | 2.03723  | 0.94097  |
| C  | -2.44320 | 2.89005  | -0.03055 |
| C  | -2.69474 | 1.13844  | 1.66597  |
| C  | -3.74236 | 2.61383  | -0.44835 |
| C  | -3.97663 | 0.91204  | 1.17993  |
| C  | -4.50165 | 1.58239  | 0.08240  |
| H  | -4.17401 | 3.22134  | -1.22730 |
| H  | -4.60029 | 0.18824  | 1.68548  |
| C  | -1.74942 | 4.16322  | -0.55369 |
| C  | -2.32177 | 0.51465  | 3.03145  |
| C  | -5.88347 | 1.21466  | -0.44729 |
| C  | 4.13052  | 0.59882  | 2.79869  |
| C  | 3.73362  | 1.31524  | -2.24904 |

|   |          |          |          |
|---|----------|----------|----------|
| C | 7.69940  | -1.04086 | -0.34066 |
| C | -3.58636 | 0.32131  | 3.88292  |
| H | -3.28958 | 0.04467  | 4.89749  |
| H | -4.18128 | 1.23575  | 3.93932  |
| H | -4.22104 | -0.48383 | 3.51005  |
| C | -1.41972 | 1.45532  | 3.83350  |
| H | -0.42466 | 1.58358  | 3.39029  |
| H | -1.86591 | 2.44717  | 3.93735  |
| H | -1.25585 | 1.04380  | 4.83312  |
| C | -1.65020 | -0.85553 | 2.91354  |
| H | -2.27280 | -1.55600 | 2.35211  |
| H | -0.68312 | -0.78642 | 2.41740  |
| H | -1.49069 | -1.27443 | 3.91176  |
| C | -6.92866 | 1.39566  | 0.65994  |
| H | -7.92066 | 1.13211  | 0.28315  |
| H | -6.72347 | 0.75813  | 1.52199  |
| H | -6.95995 | 2.43242  | 1.00525  |
| C | -6.29390 | 2.07677  | -1.63826 |
| H | -7.27459 | 1.75520  | -1.99659 |
| H | -6.37224 | 3.13445  | -1.37220 |
| H | -5.59087 | 1.97937  | -2.46921 |
| C | -5.86609 | -0.25138 | -0.89661 |
| H | -5.13692 | -0.40661 | -1.69536 |
| H | -5.61135 | -0.93134 | -0.08156 |
| H | -6.85088 | -0.53922 | -1.27492 |
| C | -2.66635 | 4.97810  | -1.46895 |
| H | -3.59606 | 5.26534  | -0.97280 |
| H | -2.14812 | 5.89647  | -1.75437 |
| H | -2.91149 | 4.44148  | -2.38839 |
| C | -1.40915 | 5.05542  | 0.64917  |
| H | -2.30877 | 5.29986  | 1.21913  |
| H | -0.69926 | 4.57822  | 1.32860  |
| H | -0.95839 | 5.99035  | 0.30414  |
| C | -0.47718 | 3.88023  | -1.35234 |
| H | 0.31727  | 3.45748  | -0.73206 |
| H | -0.66301 | 3.18549  | -2.17198 |
| H | -0.08690 | 4.81632  | -1.76294 |
| C | 2.78003  | 1.28711  | 2.95968  |
| H | 2.66898  | 2.10937  | 2.25030  |
| H | 1.91892  | 0.63118  | 2.85072  |
| H | 2.71386  | 1.71304  | 3.96385  |
| C | 5.16932  | 1.68943  | 3.14035  |
| H | 4.95665  | 2.09045  | 4.13499  |
| H | 6.18940  | 1.30543  | 3.14500  |
| H | 5.12040  | 2.51244  | 2.42382  |
| C | 4.28548  | -0.52725 | 3.82545  |
| H | 5.28947  | -0.95498 | 3.80372  |
| H | 4.12045  | -0.13116 | 4.83082  |
| H | 3.57955  | -1.34280 | 3.66926  |
| C | 2.37399  | 1.95776  | -2.01215 |
| H | 2.18024  | 2.68165  | -2.80722 |
| H | 1.55105  | 1.24684  | -2.03463 |
| H | 2.35625  | 2.50002  | -1.06383 |
| C | 3.71010  | 0.52382  | -3.55840 |
| H | 2.99510  | -0.29653 | -3.51408 |
| H | 3.41642  | 1.18658  | -4.37655 |
| H | 4.69129  | 0.11266  | -3.80494 |
| C | 4.72333  | 2.48954  | -2.40979 |
| H | 4.78134  | 3.08266  | -1.49363 |
| H | 5.73104  | 2.15700  | -2.66111 |
| H | 4.37425  | 3.14133  | -3.21491 |
| C | 8.33939  | -1.53591 | 0.95350  |
| H | 8.52398  | -0.72032 | 1.65748  |
| H | 7.72077  | -2.28789 | 1.44979  |
| H | 9.30415  | -1.99669 | 0.72952  |
| C | 8.62010  | 0.01607  | -0.96249 |

|    |          |          |          |
|----|----------|----------|----------|
| H  | 8.24468  | 0.36739  | -1.92551 |
| H  | 8.72366  | 0.88246  | -0.30467 |
| H  | 9.61494  | -0.40599 | -1.12822 |
| C  | 7.56902  | -2.22910 | -1.30133 |
| H  | 6.92845  | -3.00681 | -0.87866 |
| H  | 7.14162  | -1.92891 | -2.26000 |
| H  | 8.55272  | -2.66549 | -1.49398 |
| Au | -2.50876 | -2.55562 | -0.33077 |
| Cl | -4.04006 | -4.12382 | 0.31892  |
| Sn | -0.84199 | -0.76653 | -0.92935 |
| S  | 1.58945  | -1.38827 | -1.45899 |
| C  | 1.90298  | -1.60064 | 1.50240  |
| H  | 1.91695  | -1.23809 | 2.52485  |
| H  | 0.99252  | -2.17906 | 1.33818  |
| H  | 2.76210  | -2.24646 | 1.31691  |

#### Coordination through S atom

##### R= H

|    |          |          |          |
|----|----------|----------|----------|
| P  | 0.77450  | 0.12330  | 1.02189  |
| C  | 0.56886  | -0.13178 | -0.60453 |
| P  | -0.89834 | 0.26313  | -1.47287 |
| Cl | 0.71544  | -2.60267 | -2.87551 |
| Sn | 1.94787  | -0.60742 | -2.36739 |
| C  | -2.16664 | 1.24107  | -0.65944 |
| H  | -2.99204 | 1.39412  | -1.35769 |
| H  | -2.52426 | 0.70521  | 0.22293  |
| H  | -1.75006 | 2.20465  | -0.36508 |
| Au | -1.76181 | 0.81817  | -4.68579 |
| Cl | -3.42797 | 0.55280  | -6.17844 |
| H  | 2.14177  | -0.28979 | 1.13009  |
| H  | -1.51513 | -0.94637 | -1.83133 |
| S  | -0.12067 | 1.15198  | -3.13956 |

##### R = Me

|    |          |          |          |
|----|----------|----------|----------|
| P  | 0.40962  | 0.40797  | 0.47164  |
| C  | 0.28981  | 0.34377  | -1.18022 |
| P  | -1.26506 | 0.43831  | -1.98335 |
| Cl | 1.47670  | -1.77838 | -3.62132 |
| Sn | 1.74622  | 0.51567  | -2.93829 |
| S  | -0.74068 | 1.48309  | -3.67436 |
| C  | 2.20318  | 0.26240  | 0.83185  |
| H  | 2.39498  | -0.74754 | 1.20763  |
| H  | 2.83793  | 0.44272  | -0.03700 |
| H  | 2.46679  | 0.95925  | 1.63101  |
| C  | -1.88384 | -1.20358 | -2.36498 |
| H  | -2.10556 | -1.71658 | -1.42584 |
| H  | -2.78429 | -1.11914 | -2.97615 |
| H  | -1.11389 | -1.74934 | -2.91211 |
| C  | -2.57685 | 1.29832  | -1.09849 |
| H  | -3.46200 | 1.34366  | -1.73640 |
| H  | -2.81370 | 0.76014  | -0.17796 |
| H  | -2.24825 | 2.30913  | -0.85776 |
| Au | -2.17409 | 0.80922  | -5.31216 |
| Cl | -3.64838 | 0.19166  | -6.90246 |

##### R = t-Bu

|    |          |          |          |
|----|----------|----------|----------|
| P  | 0.96941  | -0.12090 | 0.71306  |
| C  | 0.72903  | -0.13629 | -0.93177 |
| P  | -0.91088 | 0.13626  | -1.52676 |
| Cl | 2.01880  | -2.22253 | -3.48604 |
| C  | -1.80142 | 1.40117  | -0.59112 |
| H  | -2.72087 | 1.66579  | -1.11413 |
| H  | -2.02993 | 1.04600  | 0.41500  |
| H  | -1.15939 | 2.27944  | -0.52541 |
| Au | -1.98723 | 0.37473  | -4.99439 |

|    |          |          |          |
|----|----------|----------|----------|
| Cl | -3.47093 | -0.11120 | -6.62346 |
| S  | -0.48743 | 0.94333  | -3.37964 |
| C  | -1.97850 | -1.38703 | -1.53772 |
| C  | -3.40005 | -0.99858 | -1.94452 |
| C  | -1.41016 | -2.41963 | -2.50349 |
| C  | -1.98754 | -1.95755 | -0.11812 |
| H  | -3.88410 | -0.35802 | -1.20490 |
| H  | -3.43422 | -0.50745 | -2.92054 |
| H  | -3.99131 | -1.91452 | -2.02508 |
| H  | -0.38651 | -2.70069 | -2.25393 |
| H  | -2.03460 | -3.31593 | -2.45193 |
| H  | -1.42301 | -2.06347 | -3.53491 |
| H  | -2.66192 | -2.81831 | -0.10973 |
| H  | -1.00062 | -2.30330 | 0.19065  |
| H  | -2.35604 | -1.24739 | 0.62551  |
| C  | 2.79798  | -0.37570 | 1.04297  |
| C  | 3.34198  | -1.60363 | 0.32408  |
| C  | 3.55908  | 0.88627  | 0.64056  |
| C  | 2.90945  | -0.57405 | 2.55622  |
| H  | 2.80098  | -2.51020 | 0.60620  |
| H  | 3.28357  | -1.52183 | -0.76310 |
| H  | 4.39507  | -1.74738 | 0.58854  |
| H  | 3.15814  | 1.77774  | 1.13081  |
| H  | 4.60934  | 0.79063  | 0.93631  |
| H  | 3.53451  | 1.05784  | -0.43844 |
| H  | 3.95924  | -0.70138 | 2.83706  |
| H  | 2.51613  | 0.28461  | 3.10695  |
| H  | 2.36477  | -1.46197 | 2.88792  |
| Sn | 2.05027  | 0.08391  | -2.79976 |

**R = Ph**

|    |          |          |          |
|----|----------|----------|----------|
| P  | 0.71796  | 0.44160  | 0.81322  |
| C  | 0.54994  | -0.14135 | -0.73370 |
| P  | -0.93882 | 0.00746  | -1.64603 |
| Cl | 1.62181  | -3.03602 | -2.36635 |
| Sn | 2.13275  | -0.68339 | -2.26928 |
| C  | -2.03777 | 1.34219  | -1.13535 |
| H  | -2.89299 | 1.36511  | -1.81335 |
| H  | -2.38423 | 1.18394  | -0.11281 |
| H  | -1.49268 | 2.28438  | -1.19560 |
| Au | -1.85326 | 0.15483  | -5.03594 |
| Cl | -3.50873 | -0.00445 | -6.56112 |
| C  | 2.41502  | -0.02361 | 1.25217  |
| C  | 3.00886  | -1.22005 | 0.83598  |
| C  | 3.14270  | 0.84883  | 2.06378  |
| C  | 4.31673  | -1.51239 | 1.19187  |
| H  | 2.42767  | -1.95026 | 0.27932  |
| C  | 4.45336  | 0.55876  | 2.40746  |
| H  | 2.68216  | 1.76686  | 2.41558  |
| C  | 5.04214  | -0.61937 | 1.96850  |
| H  | 4.76511  | -2.44552 | 0.87074  |
| H  | 5.01616  | 1.25068  | 3.02341  |
| H  | 6.06450  | -0.84945 | 2.24543  |
| C  | -1.88814 | -1.51999 | -1.52467 |
| C  | -2.54737 | -1.78323 | -0.32295 |
| C  | -1.94757 | -2.43735 | -2.56638 |
| C  | -3.27623 | -2.95002 | -0.17761 |
| H  | -2.48621 | -1.08819 | 0.50782  |
| C  | -2.68162 | -3.60358 | -2.41397 |
| H  | -1.42261 | -2.24499 | -3.49323 |
| C  | -3.34663 | -3.85859 | -1.22570 |
| H  | -3.78976 | -3.15091 | 0.75523  |
| H  | -2.73057 | -4.31257 | -3.23146 |
| H  | -3.92047 | -4.77100 | -1.11137 |
| S  | -0.18263 | 0.38942  | -3.50244 |

**R = Mes**

|    |          |          |          |
|----|----------|----------|----------|
| P  | 0.60530  | 0.12280  | 1.19018  |
| C  | 0.38145  | -0.23221 | -0.41678 |
| P  | -1.08393 | -0.06680 | -1.38489 |
| Cl | 1.93294  | -2.70243 | -2.27697 |
| Sn | 2.17180  | -0.34723 | -1.78704 |
| Au | -1.72619 | 1.51715  | -4.49645 |
| Cl | -3.27661 | 2.37342  | -5.89562 |
| C  | 2.41336  | -0.13241 | 1.36963  |
| C  | 2.93383  | -1.42534 | 1.55443  |
| C  | 3.26371  | 0.98641  | 1.40843  |
| C  | 4.30602  | -1.57103 | 1.72559  |
| C  | 4.62621  | 0.78901  | 1.58372  |
| C  | 5.16894  | -0.48234 | 1.73395  |
| H  | 4.70981  | -2.56888 | 1.86863  |
| H  | 5.28264  | 1.65393  | 1.60806  |
| C  | -1.99241 | -1.64698 | -1.50076 |
| C  | -2.65466 | -2.08546 | -0.33126 |
| C  | -2.04604 | -2.44886 | -2.66690 |
| C  | -3.35412 | -3.28585 | -0.35398 |
| C  | -2.77274 | -3.63240 | -2.62039 |
| C  | -3.43758 | -4.07380 | -1.48758 |
| H  | -3.84721 | -3.61009 | 0.55733  |
| H  | -2.80819 | -4.23882 | -3.51951 |
| C  | 2.72337  | 2.37570  | 1.24306  |
| H  | 2.40120  | 2.56090  | 0.21318  |
| H  | 1.85317  | 2.54952  | 1.88397  |
| H  | 3.47945  | 3.12100  | 1.49218  |
| C  | 6.64607  | -0.67275 | 1.88939  |
| H  | 7.12823  | -0.76113 | 0.91081  |
| H  | 7.10511  | 0.17351  | 2.40354  |
| H  | 6.87413  | -1.58140 | 2.44881  |
| C  | 2.04894  | -2.63621 | 1.58621  |
| H  | 1.16788  | -2.47240 | 2.21395  |
| H  | 1.68968  | -2.89800 | 0.58687  |
| H  | 2.59012  | -3.49615 | 1.98247  |
| C  | -2.69127 | -1.34815 | 0.97802  |
| H  | -3.54875 | -0.67026 | 1.02231  |
| H  | -2.81056 | -2.06223 | 1.79381  |
| H  | -1.79303 | -0.77092 | 1.19340  |
| C  | -1.38357 | -2.14523 | -3.97690 |
| H  | -1.78349 | -1.24108 | -4.43914 |
| H  | -0.30751 | -2.01476 | -3.87105 |
| H  | -1.55453 | -2.97329 | -4.66462 |
| C  | -4.21973 | -5.34885 | -1.49964 |
| H  | -4.45391 | -5.68396 | -0.48843 |
| H  | -5.16495 | -5.21477 | -2.03417 |
| H  | -3.67109 | -6.14396 | -2.00881 |
| S  | -0.16834 | 0.68722  | -3.05030 |
| C  | -2.23934 | 1.22071  | -0.85458 |
| H  | -1.69710 | 2.16633  | -0.87842 |
| H  | -3.05707 | 1.26129  | -1.57713 |
| H  | -2.63288 | 1.04427  | 0.14298  |

**R = Mes\***

|   |          |          |          |
|---|----------|----------|----------|
| P | -1.91086 | 1.98071  | 0.32669  |
| C | -1.00269 | 0.58948  | 0.27742  |
| P | 0.74944  | 0.40607  | 0.36837  |
| C | -3.62798 | 1.30050  | 0.34908  |
| C | -4.41567 | 1.37061  | -0.83025 |
| C | -4.11438 | 0.58458  | 1.46700  |
| C | -5.48970 | 0.50057  | -0.94297 |
| C | -5.19098 | -0.28271 | 1.26783  |
| C | -5.85163 | -0.39505 | 0.05744  |
| H | -6.06692 | 0.50543  | -1.85573 |
| H | -5.53303 | -0.87672 | 2.10214  |

|   |          |          |          |
|---|----------|----------|----------|
| C | -3.63748 | 0.78430  | 2.92454  |
| C | -4.19050 | 2.42083  | -1.93498 |
| C | -6.97761 | -1.39447 | -0.18482 |
| C | -2.88045 | 2.21547  | -2.69639 |
| H | -2.00427 | 2.38835  | -2.06791 |
| H | -2.80450 | 1.20327  | -3.09557 |
| H | -2.82177 | 2.92953  | -3.52332 |
| C | -4.20583 | 3.81751  | -1.29722 |
| H | -5.15036 | 3.99762  | -0.77783 |
| H | -3.39397 | 3.95513  | -0.57999 |
| H | -4.09197 | 4.58052  | -2.07236 |
| C | -5.31073 | 2.39887  | -2.97786 |
| H | -5.32391 | 1.46748  | -3.54872 |
| H | -6.29566 | 2.55046  | -2.52986 |
| H | -5.14235 | 3.21218  | -3.68732 |
| C | -2.61543 | -0.26867 | 3.35900  |
| H | -1.68395 | -0.16919 | 2.80199  |
| H | -2.38740 | -0.15345 | 4.42294  |
| H | -3.00085 | -1.27964 | 3.20633  |
| C | -3.05791 | 2.18103  | 3.15191  |
| H | -2.11237 | 2.34870  | 2.62683  |
| H | -3.75727 | 2.95932  | 2.83801  |
| H | -2.84599 | 2.32050  | 4.21548  |
| C | -4.83974 | 0.67989  | 3.87877  |
| H | -5.65880 | 1.33079  | 3.56491  |
| H | -5.22416 | -0.33721 | 3.96524  |
| H | -4.52610 | 0.98554  | 4.87988  |
| C | -7.21682 | -2.30049 | 1.01998  |
| H | -7.53997 | -1.73649 | 1.89895  |
| H | -8.00572 | -3.01860 | 0.78427  |
| H | -6.32128 | -2.86894 | 1.28371  |
| C | -6.61053 | -2.27628 | -1.38460 |
| H | -6.46529 | -1.68667 | -2.29159 |
| H | -5.68562 | -2.82741 | -1.20004 |
| H | -7.40852 | -2.99886 | -1.57698 |
| C | -8.27885 | -0.64196 | -0.48719 |
| H | -8.18602 | -0.01098 | -1.37333 |
| H | -9.09023 | -1.35241 | -0.66824 |
| H | -8.56639 | -0.00353 | 0.35200  |
| C | 2.15151  | 1.50093  | -0.07980 |
| C | 2.77181  | 1.30109  | -1.34724 |
| C | 2.92960  | 2.07219  | 0.96351  |
| C | 4.15743  | 1.27489  | -1.38491 |
| C | 4.31372  | 2.00651  | 0.84946  |
| C | 4.95650  | 1.50424  | -0.27199 |
| H | 4.63495  | 1.06424  | -2.33355 |
| H | 4.91021  | 2.37650  | 1.67225  |
| C | 2.06187  | 1.31872  | -2.71507 |
| C | 2.40920  | 0.11676  | -3.59643 |
| C | 2.58152  | 2.59524  | -3.41088 |
| H | 2.03891  | -0.81367 | -3.16814 |
| H | 1.94779  | 0.24483  | -4.57915 |
| H | 3.48529  | 0.01707  | -3.74977 |
| H | 2.35597  | 3.48508  | -2.81768 |
| H | 3.65862  | 2.56582  | -3.57927 |
| H | 2.09010  | 2.69943  | -4.38197 |
| C | 2.39216  | 2.94542  | 2.11684  |
| C | 3.02336  | 4.33843  | 1.90559  |
| C | 2.81448  | 2.45026  | 3.50322  |
| H | 2.77729  | 4.73240  | 0.91695  |
| H | 2.63092  | 5.02998  | 2.65623  |
| H | 4.10894  | 4.32006  | 2.00142  |
| H | 2.38617  | 1.48028  | 3.75405  |
| H | 3.89917  | 2.35884  | 3.58224  |
| H | 2.48892  | 3.16589  | 4.26293  |
| C | 6.46243  | 1.29724  | -0.34742 |

|    |          |          |          |
|----|----------|----------|----------|
| C  | 7.06312  | 2.26566  | -1.37362 |
| C  | 6.73908  | -0.14736 | -0.78343 |
| H  | 6.87950  | 3.30532  | -1.09026 |
| H  | 8.14427  | 2.11627  | -1.43809 |
| H  | 6.64676  | 2.10905  | -2.37087 |
| H  | 6.31196  | -0.86821 | -0.08238 |
| H  | 6.32079  | -0.35882 | -1.76958 |
| H  | 7.81784  | -0.31750 | -0.83651 |
| Cl | -2.36015 | -1.45985 | -2.28385 |
| Au | 2.78132  | -2.41283 | 0.12108  |
| Cl | 4.64540  | -3.42208 | 0.91687  |
| C  | 0.88718  | 3.18729  | 2.07048  |
| H  | 0.57745  | 3.57222  | 1.09682  |
| H  | 0.28180  | 2.31011  | 2.28919  |
| H  | 0.62240  | 3.93759  | 2.81971  |
| C  | 0.54929  | 1.47674  | -2.64209 |
| H  | 0.02998  | 0.57919  | -2.30897 |
| H  | 0.27183  | 2.31191  | -1.99429 |
| H  | 0.16890  | 1.69761  | -3.64234 |
| C  | 7.14300  | 1.53221  | 0.99845  |
| H  | 7.04713  | 2.56862  | 1.33363  |
| H  | 6.73949  | 0.87560  | 1.77305  |
| H  | 8.21022  | 1.31820  | 0.90713  |
| Sn | -1.68112 | -1.59762 | 0.03152  |
| S  | 0.95369  | -1.34835 | -0.73174 |
| C  | 1.07955  | -0.16941 | 2.06140  |
| H  | 2.14105  | -0.39903 | 2.15766  |
| H  | 0.76879  | 0.54673  | 2.81670  |
| H  | 0.51487  | -1.09380 | 2.19120  |

#### Coordination through P(sp<sup>2</sup>) atom

##### R= H

|    |          |          |          |
|----|----------|----------|----------|
| P  | 0.66385  | 0.00714  | 0.86972  |
| C  | 0.41970  | -0.30207 | -0.71760 |
| P  | -1.07088 | -0.12119 | -1.62534 |
| Cl | 1.00017  | -2.87711 | -2.79038 |
| Sn | 1.82604  | -0.62515 | -2.52304 |
| C  | -2.37513 | 0.87993  | -0.89998 |
| H  | -3.22093 | 0.89751  | -1.59053 |
| H  | -2.68922 | 0.45276  | 0.05510  |
| H  | -2.01012 | 1.89597  | -0.74740 |
| Au | -0.66610 | 0.64530  | 2.50730  |
| Cl | -2.06347 | 1.30233  | 4.15420  |
| H  | 2.04348  | -0.19790 | 1.09508  |
| H  | -1.62210 | -1.41387 | -1.71370 |
| S  | -0.44377 | 0.53983  | -3.40494 |

##### R = Me

|    |          |          |          |
|----|----------|----------|----------|
| P  | 0.42905  | 0.51839  | 0.37757  |
| C  | 0.16658  | 0.28785  | -1.21833 |
| P  | -1.39866 | 0.08188  | -1.99503 |
| Cl | 1.57291  | -2.14879 | -3.10767 |
| Sn | 1.49442  | 0.27637  | -3.09933 |
| S  | -1.02196 | 0.51826  | -3.92313 |
| C  | 2.19543  | 0.65698  | 0.74455  |
| H  | 2.48315  | -0.17881 | 1.38717  |
| H  | 2.79420  | 0.64298  | -0.16607 |
| H  | 2.37387  | 1.58064  | 1.29920  |
| C  | -1.93434 | -1.62288 | -1.78306 |
| H  | -2.13472 | -1.81722 | -0.72697 |
| H  | -2.83766 | -1.78911 | -2.37318 |
| H  | -1.13612 | -2.27556 | -2.14029 |
| C  | -2.71330 | 1.12467  | -1.34020 |
| H  | -3.61168 | 0.96946  | -1.94145 |
| H  | -2.91891 | 0.87006  | -0.29794 |

|    |          |         |          |
|----|----------|---------|----------|
| H  | -2.41012 | 2.16920 | -1.41120 |
| Au | -1.02705 | 0.63371 | 2.03829  |
| Cl | -2.55742 | 0.73179 | 3.70220  |

**R = t-Bu**

|    |          |          |          |
|----|----------|----------|----------|
| P  | 0.71391  | 0.16228  | 0.70744  |
| C  | 0.48545  | -0.31807 | -0.84500 |
| P  | -1.10258 | -0.42462 | -1.62312 |
| Cl | 2.22040  | -2.86669 | -2.56591 |
| Sn | 1.83378  | -0.47781 | -2.72778 |
| C  | -2.14917 | 1.00314  | -1.26100 |
| H  | -3.03804 | 0.96408  | -1.89182 |
| H  | -2.43537 | 1.03325  | -0.20828 |
| H  | -1.58228 | 1.90149  | -1.50638 |
| Au | -0.80008 | 0.85759  | 2.18068  |
| Cl | -2.37010 | 1.58982  | 3.64484  |
| C  | 2.46604  | 0.12379  | 1.30931  |
| C  | 2.79171  | 1.52428  | 1.83356  |
| C  | 2.48071  | -0.87862 | 2.46919  |
| C  | 3.45933  | -0.29572 | 0.23964  |
| H  | 2.79935  | 2.26582  | 1.03123  |
| H  | 2.07782  | 1.84964  | 2.59413  |
| H  | 3.78557  | 1.50965  | 2.29072  |
| H  | 2.27647  | -1.89551 | 2.12632  |
| H  | 3.47355  | -0.86910 | 2.92904  |
| H  | 1.75192  | -0.61964 | 3.24116  |
| H  | 4.45703  | -0.35907 | 0.68499  |
| H  | 3.22524  | -1.27685 | -0.18060 |
| H  | 3.51792  | 0.43839  | -0.56834 |
| C  | -2.04245 | -1.95214 | -1.13843 |
| C  | -1.19435 | -3.17672 | -1.46691 |
| C  | -2.37392 | -1.92968 | 0.35042  |
| C  | -3.32969 | -1.97346 | -1.96495 |
| H  | -0.94586 | -3.22683 | -2.52761 |
| H  | -0.25858 | -3.19120 | -0.90640 |
| H  | -1.76408 | -4.07275 | -1.20446 |
| H  | -2.98332 | -1.07167 | 0.64052  |
| H  | -2.94586 | -2.83125 | 0.58849  |
| H  | -1.47630 | -1.94091 | 0.97080  |
| H  | -3.84754 | -2.91652 | -1.76981 |
| H  | -4.01083 | -1.16413 | -1.69409 |
| H  | -3.12463 | -1.92092 | -3.03628 |
| S  | -0.67128 | -0.44625 | -3.59520 |

**R = Ph**

|    |          |          |          |
|----|----------|----------|----------|
| P  | 0.68136  | 0.24878  | 0.63034  |
| C  | 0.47082  | -0.35971 | -0.87615 |
| P  | -1.06502 | -0.51262 | -1.72364 |
| Cl | 1.96475  | -3.22637 | -2.15984 |
| Sn | 1.91882  | -0.83437 | -2.58945 |
| C  | -2.14968 | 0.91526  | -1.53576 |
| H  | -3.04508 | 0.75005  | -2.13774 |
| H  | -2.42831 | 1.07083  | -0.49201 |
| H  | -1.62030 | 1.79476  | -1.90316 |
| Au | -0.80929 | 1.17740  | 1.98303  |
| Cl | -2.39751 | 2.09800  | 3.31083  |
| C  | 2.38466  | 0.11458  | 1.15505  |
| C  | 2.88137  | 1.06660  | 2.04711  |
| C  | 3.20912  | -0.92290 | 0.71139  |
| C  | 4.20186  | 1.00527  | 2.45835  |
| H  | 2.23155  | 1.85515  | 2.41250  |
| C  | 4.52589  | -0.98114 | 1.13547  |
| H  | 2.81081  | -1.70759 | 0.07595  |
| C  | 5.02403  | -0.01503 | 1.99981  |
| H  | 4.58841  | 1.75122  | 3.14265  |
| H  | 5.16102  | -1.79182 | 0.79830  |

|   |          |          |          |
|---|----------|----------|----------|
| H | 6.05539  | -0.06621 | 2.32956  |
| C | -1.96825 | -1.94478 | -1.09839 |
| C | -2.72894 | -1.83569 | 0.06623  |
| C | -1.86827 | -3.16774 | -1.75368 |
| C | -3.39322 | -2.94508 | 0.56093  |
| H | -2.80399 | -0.89447 | 0.59962  |
| C | -2.53457 | -4.27425 | -1.25041 |
| H | -1.26547 | -3.24875 | -2.65025 |
| C | -3.29708 | -4.16359 | -0.09776 |
| H | -3.98571 | -2.85597 | 1.46382  |
| H | -2.45321 | -5.22612 | -1.76173 |
| H | -3.81784 | -5.03050 | 0.29264  |
| S | -0.52603 | -0.73078 | -3.64869 |

**R = Mes**

|    |          |          |          |
|----|----------|----------|----------|
| P  | 0.66980  | 0.45275  | 1.00433  |
| C  | 0.30384  | -0.34776 | -0.37903 |
| P  | -1.16474 | -0.40753 | -1.35746 |
| Cl | 1.59752  | -3.11710 | -2.03531 |
| Sn | 1.92584  | -0.70923 | -1.95544 |
| Au | -0.61052 | 1.62899  | 2.38241  |
| Cl | -1.93365 | 2.83651  | 3.77217  |
| C  | 2.43845  | 0.29611  | 1.31995  |
| C  | 3.26569  | 1.42140  | 1.16189  |
| C  | 2.96391  | -0.93209 | 1.75380  |
| C  | 4.62077  | 1.28766  | 1.42282  |
| C  | 4.32877  | -1.00884 | 2.00486  |
| C  | 5.17199  | 0.08278  | 1.84575  |
| H  | 5.26608  | 2.15081  | 1.29051  |
| H  | 4.74308  | -1.95467 | 2.34001  |
| C  | -1.99391 | -2.02997 | -1.20076 |
| C  | -2.48714 | -2.38509 | 0.07413  |
| C  | -2.16411 | -2.93149 | -2.27960 |
| C  | -3.08111 | -3.62826 | 0.25672  |
| C  | -2.77997 | -4.15169 | -2.02988 |
| C  | -3.23143 | -4.53451 | -0.77647 |
| H  | -3.44223 | -3.88381 | 1.24832  |
| H  | -2.90471 | -4.83562 | -2.86321 |
| C  | 2.71796  | 2.73920  | 0.70360  |
| H  | 2.25672  | 2.66108  | -0.28570 |
| H  | 1.95044  | 3.11458  | 1.38770  |
| H  | 3.50813  | 3.48786  | 0.64391  |
| C  | 2.10703  | -2.14651 | 1.95552  |
| H  | 1.19217  | -1.90798 | 2.50553  |
| H  | 1.80349  | -2.59025 | 1.00286  |
| H  | 2.64992  | -2.90488 | 2.52041  |
| C  | 6.63408  | -0.02281 | 2.14997  |
| H  | 6.84800  | 0.36491  | 3.15081  |
| H  | 6.97443  | -1.05862 | 2.11761  |
| H  | 7.22964  | 0.55817  | 1.44313  |
| C  | -2.47556 | -1.49604 | 1.28319  |
| H  | -2.37997 | -2.09713 | 2.18846  |
| H  | -1.67073 | -0.76653 | 1.29896  |
| H  | -3.41802 | -0.94590 | 1.36694  |
| C  | -1.74737 | -2.69840 | -3.70274 |
| H  | -2.14494 | -1.77012 | -4.11136 |
| H  | -0.66214 | -2.65784 | -3.79876 |
| H  | -2.11071 | -3.52218 | -4.31797 |
| C  | -3.84208 | -5.88181 | -0.55314 |
| H  | -4.47407 | -6.17555 | -1.39356 |
| H  | -3.06239 | -6.64301 | -0.45194 |
| H  | -4.44431 | -5.90217 | 0.35623  |
| C  | -2.40136 | 0.86072  | -0.99592 |
| H  | -2.85824 | 0.73280  | -0.01650 |
| H  | -1.91490 | 1.83500  | -1.05207 |
| H  | -3.17074 | 0.79749  | -1.76859 |



|   |          |         |          |
|---|----------|---------|----------|
| S | -0.34654 | 0.06771 | -3.14111 |
|---|----------|---------|----------|

**R = Mes\***

|    |          |          |          |
|----|----------|----------|----------|
| P  | -0.99035 | 0.88573  | 0.09493  |
| C  | -0.29310 | -0.56216 | 0.42994  |
| P  | 1.35813  | -1.15223 | 0.66227  |
| Cl | -2.02718 | -2.82644 | -1.86806 |
| C  | 2.99760  | -0.47362 | 0.16553  |
| C  | 3.56141  | -0.95411 | -1.05310 |
| C  | 3.88224  | 0.02856  | 1.15982  |
| C  | 4.91068  | -1.27609 | -1.05531 |
| C  | 5.22149  | -0.34512 | 1.08443  |
| C  | 5.74608  | -1.08208 | 0.03614  |
| H  | 5.32918  | -1.69006 | -1.96397 |
| H  | 5.88157  | -0.02005 | 1.87640  |
| C  | -2.79232 | 0.61131  | 0.14447  |
| C  | -3.53920 | 0.46243  | -1.05393 |
| C  | -3.38370 | 0.28314  | 1.39142  |
| C  | -4.73471 | -0.24499 | -0.97862 |
| C  | -4.56758 | -0.44604 | 1.36964  |
| C  | -5.23201 | -0.77848 | 0.19998  |
| H  | -5.28649 | -0.41297 | -1.88815 |
| H  | -4.99417 | -0.75969 | 2.31334  |
| C  | -3.17152 | 1.11992  | -2.39828 |
| C  | -2.90590 | 0.74357  | 2.78724  |
| C  | -6.47872 | -1.65514 | 0.24903  |
| C  | 3.56915  | 1.11168  | 2.21614  |
| C  | 2.88083  | -0.97046 | -2.43696 |
| C  | 7.18606  | -1.57782 | 0.00361  |
| C  | -4.11864 | 1.31529  | 3.54597  |
| H  | -3.78392 | 1.71801  | 4.50513  |
| H  | -4.58732 | 2.12534  | 2.98251  |
| H  | -4.88152 | 0.56717  | 3.75980  |
| C  | -1.88070 | 1.87600  | 2.76531  |
| H  | -0.88628 | 1.55322  | 2.45480  |
| H  | -2.19406 | 2.70164  | 2.12198  |
| H  | -1.76648 | 2.27268  | 3.77770  |
| C  | -2.33839 | -0.42935 | 3.59045  |
| H  | -3.05756 | -1.24772 | 3.66707  |
| H  | -1.43205 | -0.81998 | 3.12420  |
| H  | -2.08654 | -0.10459 | 4.60427  |
| C  | -7.55412 | -0.97812 | 1.10665  |
| H  | -8.45004 | -1.60368 | 1.14731  |
| H  | -7.21583 | -0.81607 | 2.13218  |
| H  | -7.83524 | -0.00844 | 0.68846  |
| C  | -7.06100 | -1.91271 | -1.13824 |
| H  | -7.93100 | -2.56781 | -1.05049 |
| H  | -7.39350 | -0.98955 | -1.61983 |
| H  | -6.33951 | -2.40521 | -1.79451 |
| C  | -6.10645 | -3.00679 | 0.87075  |
| H  | -5.34662 | -3.51482 | 0.27202  |
| H  | -5.71588 | -2.89276 | 1.88429  |
| H  | -6.98797 | -3.65176 | 0.92273  |
| C  | -4.19223 | 0.79748  | -3.49399 |
| H  | -5.19865 | 1.13813  | -3.24040 |
| H  | -3.89420 | 1.31962  | -4.40563 |
| H  | -4.22583 | -0.27058 | -3.72207 |
| C  | -3.19961 | 2.64182  | -2.19814 |
| H  | -4.18745 | 2.97059  | -1.86541 |
| H  | -2.46797 | 2.97570  | -1.45886 |
| H  | -2.96924 | 3.14755  | -3.13956 |
| C  | -1.81305 | 0.68460  | -2.94932 |
| H  | -0.97393 | 1.03235  | -2.34479 |
| H  | -1.74708 | -0.40029 | -3.03412 |
| H  | -1.66986 | 1.12602  | -3.93969 |
| C  | 2.18443  | 1.73395  | 2.08142  |

|    |          |          |          |
|----|----------|----------|----------|
| H  | 2.06365  | 2.18178  | 1.09313  |
| H  | 1.35219  | 1.05276  | 2.23968  |
| H  | 2.07668  | 2.53813  | 2.81321  |
| C  | 4.53660  | 2.28097  | 1.92569  |
| H  | 4.29039  | 3.11911  | 2.58286  |
| H  | 5.57923  | 2.01564  | 2.10107  |
| H  | 4.43762  | 2.62311  | 0.89368  |
| C  | 3.83213  | 0.64975  | 3.65345  |
| H  | 4.85457  | 0.28540  | 3.77243  |
| H  | 3.70322  | 1.49361  | 4.33635  |
| H  | 3.16142  | -0.14508 | 3.97730  |
| C  | 1.43819  | -0.48627 | -2.44915 |
| H  | 1.12850  | -0.33536 | -3.48605 |
| H  | 0.74222  | -1.20307 | -2.01669 |
| H  | 1.33930  | 0.47524  | -1.93848 |
| C  | 2.95675  | -2.33696 | -3.12266 |
| H  | 2.38612  | -3.08528 | -2.57334 |
| H  | 2.53641  | -2.25923 | -4.12879 |
| H  | 3.98450  | -2.69171 | -3.22338 |
| C  | 3.66954  | 0.05070  | -3.28446 |
| H  | 3.63483  | 1.04514  | -2.83291 |
| H  | 4.71643  | -0.22894 | -3.40869 |
| H  | 3.21796  | 0.11413  | -4.27799 |
| C  | 7.92959  | -1.28065 | 1.30303  |
| H  | 8.02917  | -0.20691 | 1.48128  |
| H  | 7.43183  | -1.72963 | 2.16634  |
| H  | 8.93829  | -1.69667 | 1.24878  |
| C  | 7.93863  | -0.90297 | -1.14945 |
| H  | 7.48603  | -1.12779 | -2.11712 |
| H  | 7.95040  | 0.18284  | -1.02785 |
| H  | 8.97384  | -1.25396 | -1.17700 |
| C  | 7.18033  | -3.09586 | -0.21320 |
| H  | 6.66073  | -3.60599 | 0.60149  |
| H  | 6.68543  | -3.36885 | -1.14719 |
| H  | 8.20574  | -3.47336 | -0.25325 |
| Sn | -1.34689 | -2.65030 | 0.45557  |
| Au | -0.02540 | 2.83790  | -0.38721 |
| Cl | 0.98764  | 4.81737  | -0.86105 |
| S  | 1.21884  | -3.03760 | -0.08420 |
| C  | 1.46062  | -1.48367 | 2.45047  |
| H  | 0.65329  | -2.18529 | 2.66642  |
| H  | 2.40904  | -1.98636 | 2.64263  |
| H  | 1.35504  | -0.61109 | 3.08662  |

**Coordination through  $\pi(C=P)$  bond**

|             |          |          |          |
|-------------|----------|----------|----------|
| <b>R= H</b> |          |          |          |
| P           | 0.68588  | 0.03286  | 1.07565  |
| C           | 0.54022  | 0.05431  | -0.64286 |
| P           | -0.98495 | -0.05900 | -1.53265 |
| Cl          | 1.26184  | -2.76197 | -2.30204 |
| Sn          | 1.90102  | -0.42931 | -2.46601 |
| C           | -2.39630 | 0.86457  | -0.90205 |
| H           | -3.27111 | 0.63202  | -1.51267 |
| H           | -2.58652 | 0.57809  | 0.13506  |
| H           | -2.18630 | 1.93318  | -0.95956 |
| Au          | 0.92260  | 2.10222  | -0.08201 |
| Cl          | 1.28854  | 4.32101  | -0.16498 |
| H           | 2.09270  | -0.20866 | 1.15804  |
| H           | -1.37370 | -1.40709 | -1.41178 |
| S           | -0.49241 | 0.40299  | -3.41113 |

|               |          |          |          |
|---------------|----------|----------|----------|
| <b>R = Me</b> |          |          |          |
| P             | 0.65646  | 0.03055  | 1.02380  |
| C             | 0.46822  | 0.12009  | -0.68445 |
| P             | -1.07992 | -0.11080 | -1.52111 |

|    |          |          |          |
|----|----------|----------|----------|
| Cl | 1.75346  | -2.66386 | -2.15708 |
| Sn | 1.85038  | -0.25254 | -2.51241 |
| C  | 2.43786  | -0.32763 | 1.27316  |
| H  | 2.52893  | -1.41210 | 1.39518  |
| H  | 3.07023  | -0.01239 | 0.44281  |
| H  | 2.77650  | 0.14632  | 2.19651  |
| C  | -1.67235 | -1.76892 | -1.14197 |
| H  | -1.93549 | -1.83656 | -0.08392 |
| H  | -2.54647 | -1.98275 | -1.75965 |
| H  | -0.87641 | -2.47783 | -1.37697 |
| C  | -2.40935 | 1.01022  | -1.03972 |
| H  | -3.30850 | 0.75241  | -1.60369 |
| H  | -2.60731 | 0.91302  | 0.03015  |
| H  | -2.12335 | 2.03688  | -1.26864 |
| Au | 0.74444  | 2.16600  | -0.05766 |
| Cl | 1.00001  | 4.40468  | -0.00129 |
| S  | -0.61699 | 0.08606  | -3.46598 |

**R = t-Bu**

|    |          |          |          |
|----|----------|----------|----------|
| P  | 0.99470  | 0.14204  | 1.01469  |
| C  | 0.61181  | 0.10737  | -0.66658 |
| P  | -1.05585 | -0.21541 | -1.24216 |
| Cl | 2.31444  | -2.39985 | -2.51025 |
| Sn | 1.71861  | -0.04457 | -2.71814 |
| C  | -1.76787 | -1.79127 | -0.55537 |
| Au | 0.85816  | 2.21351  | -0.17643 |
| Cl | 1.04559  | 4.46137  | -0.23300 |
| C  | 2.83087  | -0.10518 | 1.27272  |
| C  | 3.74479  | 0.21046  | 0.10274  |
| C  | 3.18667  | 0.76425  | 2.48021  |
| C  | 2.94664  | -1.58869 | 1.64572  |
| H  | 3.59161  | -0.48569 | -0.72542 |
| H  | 3.62283  | 1.23688  | -0.25196 |
| H  | 4.78788  | 0.09379  | 0.41620  |
| H  | 2.52254  | 0.57485  | 3.32822  |
| H  | 4.20889  | 0.54123  | 2.80060  |
| H  | 3.13357  | 1.82891  | 2.23932  |
| H  | 3.97269  | -1.79816 | 1.96480  |
| H  | 2.28473  | -1.85695 | 2.47462  |
| H  | 2.72209  | -2.23377 | 0.79268  |
| C  | -2.22574 | 1.09576  | -0.80622 |
| H  | -2.25005 | 1.25116  | 0.27316  |
| H  | -1.91220 | 2.01595  | -1.29942 |
| H  | -3.22063 | 0.82703  | -1.16582 |
| C  | -2.17655 | -1.59090 | 0.90351  |
| H  | -2.52746 | -2.54903 | 1.29771  |
| H  | -1.34337 | -1.26293 | 1.52904  |
| H  | -2.99347 | -0.87458 | 1.00995  |
| C  | -0.73488 | -2.90738 | -0.67044 |
| H  | 0.13971  | -2.72525 | -0.04441 |
| H  | -1.19565 | -3.84293 | -0.34036 |
| H  | -0.38722 | -3.04029 | -1.69567 |
| C  | -2.99694 | -2.14927 | -1.39280 |
| H  | -3.42091 | -3.07733 | -0.99897 |
| H  | -3.77714 | -1.38636 | -1.34141 |
| H  | -2.73752 | -2.31115 | -2.43978 |
| S  | -0.86846 | -0.31621 | -3.24660 |

**R = Ph**

|    |          |          |          |
|----|----------|----------|----------|
| P  | 0.57579  | 0.26509  | 0.93364  |
| C  | 0.37614  | 0.19330  | -0.77567 |
| P  | -1.19556 | -0.01612 | -1.57213 |
| Cl | 1.73769  | -2.38245 | -2.79953 |
| Sn | 1.71719  | 0.05115  | -2.67501 |
| C  | -2.52526 | 1.03161  | -0.94147 |
| H  | -3.44203 | 0.79097  | -1.48302 |

|    |          |          |          |
|----|----------|----------|----------|
| H  | -2.67506 | 0.85224  | 0.12501  |
| H  | -2.26481 | 2.07784  | -1.10479 |
| Au | 0.68576  | 2.30160  | -0.32021 |
| Cl | 0.97128  | 4.53599  | -0.44245 |
| C  | 2.33411  | -0.07252 | 1.22524  |
| C  | 2.95126  | 0.57853  | 2.29585  |
| C  | 3.05153  | -1.01589 | 0.48816  |
| C  | 4.27968  | 0.32638  | 2.59243  |
| H  | 2.39257  | 1.29744  | 2.88703  |
| C  | 4.37697  | -1.27623 | 0.80063  |
| H  | 2.56908  | -1.57266 | -0.30882 |
| C  | 4.99370  | -0.60018 | 1.84376  |
| H  | 4.75884  | 0.85015  | 3.41140  |
| H  | 4.92667  | -2.01340 | 0.22679  |
| H  | 6.03171  | -0.80275 | 2.08161  |
| C  | -1.75886 | -1.71222 | -1.30107 |
| C  | -1.84695 | -2.60659 | -2.36052 |
| C  | -2.11620 | -2.11753 | -0.01494 |
| C  | -2.29986 | -3.89821 | -2.13646 |
| H  | -1.54913 | -2.29033 | -3.35280 |
| C  | -2.56587 | -3.40824 | 0.20265  |
| H  | -2.03492 | -1.43388 | 0.82404  |
| C  | -2.65955 | -4.29838 | -0.85951 |
| H  | -2.36241 | -4.59464 | -2.96418 |
| H  | -2.84075 | -3.72143 | 1.20306  |
| H  | -3.00947 | -5.30973 | -0.68680 |
| S  | -0.81646 | 0.37826  | -3.50163 |

**R = Mes**

|    |          |          |          |
|----|----------|----------|----------|
| P  | 0.51924  | 0.34083  | 1.35444  |
| C  | 0.15410  | 0.26475  | -0.33557 |
| P  | -1.35775 | 0.05896  | -1.26228 |
| Cl | 1.82119  | -1.82057 | -2.78882 |
| Sn | 1.66923  | 0.51311  | -2.08213 |
| Au | 0.20234  | 2.39189  | 0.17476  |
| Cl | 0.09796  | 4.65355  | 0.13284  |
| C  | 2.32376  | 0.04960  | 1.40397  |
| C  | 3.23620  | 1.02039  | 1.84897  |
| C  | 2.76222  | -1.26359 | 1.14060  |
| C  | 4.58395  | 0.68812  | 1.91529  |
| C  | 4.11924  | -1.54338 | 1.22665  |
| C  | 5.05046  | -0.57738 | 1.58666  |
| H  | 5.28941  | 1.44403  | 2.24761  |
| H  | 4.45448  | -2.55561 | 1.02118  |
| C  | -1.81603 | -1.71123 | -1.33218 |
| C  | -1.84856 | -2.46637 | -2.52964 |
| C  | -2.15258 | -2.34435 | -0.11455 |
| C  | -2.13717 | -3.82365 | -2.44826 |
| C  | -2.41968 | -3.70810 | -0.10289 |
| C  | -2.39983 | -4.47521 | -1.25383 |
| H  | -2.15397 | -4.39363 | -3.37158 |
| H  | -2.66243 | -4.17674 | 0.84611  |
| C  | 2.81383  | 2.39739  | 2.26370  |
| H  | 2.67742  | 3.06119  | 1.40451  |
| H  | 1.86881  | 2.38977  | 2.81338  |
| H  | 3.57015  | 2.84904  | 2.90749  |
| C  | 1.80811  | -2.37998 | 0.82921  |
| H  | 0.94018  | -2.36698 | 1.49649  |
| H  | 1.43661  | -2.33126 | -0.19698 |
| H  | 2.30452  | -3.34325 | 0.95318  |
| C  | 6.51275  | -0.89588 | 1.62710  |
| H  | 6.68698  | -1.93446 | 1.91438  |
| H  | 6.96488  | -0.75081 | 0.64090  |
| H  | 7.04297  | -0.24973 | 2.32868  |
| C  | -2.32969 | -1.64862 | 1.20572  |
| H  | -2.07783 | -2.32709 | 2.02214  |

|   |          |          |          |
|---|----------|----------|----------|
| H | -1.72435 | -0.75528 | 1.33918  |
| H | -3.37787 | -1.36296 | 1.34158  |
| C | -1.62885 | -1.93281 | -3.91513 |
| H | -2.26159 | -1.07373 | -4.13574 |
| H | -0.59472 | -1.62449 | -4.06773 |
| H | -1.85804 | -2.71713 | -4.63741 |
| C | -2.64784 | -5.94999 | -1.21502 |
| H | -3.21473 | -6.28068 | -2.08738 |
| H | -1.70002 | -6.49708 | -1.21764 |
| H | -3.19433 | -6.24056 | -0.31655 |
| C | -2.83399 | 0.94145  | -0.68525 |
| H | -2.61549 | 2.01007  | -0.68058 |
| H | -3.62958 | 0.74267  | -1.40728 |
| H | -3.15628 | 0.62310  | 0.30362  |
| S | -0.81117 | 0.97284  | -2.97681 |

**R = Mes\***

|    |          |          |          |
|----|----------|----------|----------|
| P  | 0.68894  | 0.00840  | 1.07969  |
| C  | 0.43223  | 0.09078  | -0.64221 |
| P  | -1.10127 | -0.05758 | -1.63281 |
| Cl | 3.01878  | -1.30238 | -3.25498 |
| Au | 0.38417  | 2.17451  | 0.03600  |
| Cl | 0.08130  | 4.42929  | -0.00271 |
| C  | 2.53884  | -0.04968 | 1.21392  |
| C  | 3.25575  | -1.17719 | 0.72719  |
| C  | 3.27933  | 1.08349  | 1.63372  |
| C  | 4.56655  | -0.99012 | 0.31380  |
| C  | 4.59326  | 1.20318  | 1.17632  |
| C  | 5.23287  | 0.22399  | 0.43672  |
| H  | 5.09612  | -1.83592 | -0.10527 |
| H  | 5.13738  | 2.10088  | 1.43416  |
| C  | 2.87293  | 2.10642  | 2.71696  |
| C  | 2.79832  | -2.64102 | 0.87909  |
| C  | 6.62687  | 0.40107  | -0.15357 |
| C  | 3.83897  | 1.85463  | 3.89367  |
| H  | 3.74151  | 0.83242  | 4.26832  |
| H  | 4.88026  | 2.01010  | 3.60970  |
| H  | 3.60478  | 2.54238  | 4.71090  |
| C  | 3.04355  | 3.55506  | 2.25241  |
| H  | 2.38393  | 3.79739  | 1.41833  |
| H  | 2.79851  | 4.23343  | 3.07428  |
| H  | 4.06900  | 3.77012  | 1.94762  |
| C  | 1.47265  | 1.93899  | 3.29952  |
| H  | 1.38027  | 2.58179  | 4.17911  |
| H  | 0.67998  | 2.24400  | 2.61316  |
| H  | 1.28176  | 0.91257  | 3.62253  |
| C  | 3.08018  | -3.48635 | -0.36391 |
| H  | 2.59246  | -3.07904 | -1.24736 |
| H  | 4.14689  | -3.55484 | -0.58204 |
| H  | 2.71951  | -4.50570 | -0.19970 |
| C  | 3.62907  | -3.20338 | 2.04903  |
| H  | 4.69829  | -3.16138 | 1.83569  |
| H  | 3.44661  | -2.64031 | 2.96796  |
| H  | 3.35679  | -4.24808 | 2.22678  |
| C  | 1.33720  | -2.82689 | 1.26921  |
| H  | 1.08578  | -2.29291 | 2.19085  |
| H  | 0.65046  | -2.52174 | 0.47986  |
| H  | 1.15125  | -3.88783 | 1.45940  |
| C  | 7.21136  | 1.77860  | 0.14672  |
| H  | 6.58136  | 2.58054  | -0.24589 |
| H  | 7.34810  | 1.94031  | 1.21936  |
| H  | 8.19227  | 1.86820  | -0.32610 |
| C  | 6.53556  | 0.23424  | -1.67523 |
| H  | 7.52901  | 0.32460  | -2.12382 |
| H  | 6.12137  | -0.73626 | -1.95441 |
| H  | 5.89329  | 1.00155  | -2.11434 |

|    |          |          |          |
|----|----------|----------|----------|
| C  | 7.57723  | -0.65780 | 0.41743  |
| H  | 7.64842  | -0.57607 | 1.50506  |
| H  | 7.25245  | -1.67146 | 0.17531  |
| H  | 8.57897  | -0.52431 | -0.00013 |
| C  | -2.35366 | -1.43971 | -1.67148 |
| C  | -2.33468 | -2.33760 | -2.77864 |
| C  | -3.59751 | -1.24557 | -1.00823 |
| C  | -3.54007 | -2.61291 | -3.40956 |
| C  | -1.14755 | -3.21734 | -3.21230 |
| C  | -4.76476 | -1.58081 | -1.68840 |
| C  | -3.79267 | -0.89299 | 0.48014  |
| C  | -4.76804 | -2.16421 | -2.94508 |
| H  | -3.51141 | -3.23438 | -4.29607 |
| C  | -0.74261 | -3.03584 | -4.67653 |
| C  | -1.62487 | -4.67482 | -3.02998 |
| C  | 0.06054  | -3.07441 | -2.30351 |
| H  | -5.70881 | -1.38247 | -1.20010 |
| C  | -2.50175 | -0.61783 | 1.23321  |
| C  | -4.37981 | -2.16880 | 1.12038  |
| C  | -4.78373 | 0.25061  | 0.71807  |
| C  | -6.03812 | -2.41140 | -3.74851 |
| H  | 0.00162  | -3.79129 | -4.94161 |
| H  | -1.59559 | -3.16081 | -5.34776 |
| H  | -0.30595 | -2.05514 | -4.85290 |
| H  | -2.42664 | -4.94440 | -3.71841 |
| H  | -0.78388 | -5.34739 | -3.21874 |
| H  | -1.97888 | -4.85037 | -2.01102 |
| H  | 0.53259  | -2.09689 | -2.36406 |
| H  | -0.21396 | -3.28733 | -1.26825 |
| H  | 0.82234  | -3.79741 | -2.60164 |
| H  | -1.77277 | -1.41429 | 1.07247  |
| H  | -2.03492 | 0.33280  | 0.98007  |
| H  | -2.70525 | -0.57688 | 2.30587  |
| H  | -4.51269 | -2.00822 | 2.19389  |
| H  | -5.34808 | -2.43380 | 0.69453  |
| H  | -3.70652 | -3.01815 | 0.98302  |
| H  | -5.76943 | 0.03197  | 0.30433  |
| H  | -4.90904 | 0.40379  | 1.79307  |
| H  | -4.44832 | 1.19437  | 0.28664  |
| C  | -7.27435 | -1.82863 | -3.06898 |
| C  | -6.25136 | -3.91907 | -3.92970 |
| C  | -5.88600 | -1.75155 | -5.12428 |
| H  | -7.47864 | -2.30954 | -2.10889 |
| H  | -7.17590 | -0.75300 | -2.90235 |
| H  | -8.14844 | -1.98697 | -3.70488 |
| H  | -5.42207 | -4.38551 | -4.46489 |
| H  | -6.35259 | -4.41962 | -2.96360 |
| H  | -7.16315 | -4.10182 | -4.50488 |
| H  | -5.74830 | -0.67191 | -5.02786 |
| H  | -5.02892 | -2.14981 | -5.67076 |
| H  | -6.78098 | -1.92848 | -5.72695 |
| Sn | 1.95611  | 0.70522  | -2.34199 |
| S  | -0.36306 | 0.21921  | -3.50186 |
| C  | -2.21365 | 1.37887  | -1.47033 |
| H  | -2.63111 | 1.51366  | -0.47759 |
| H  | -1.65384 | 2.26836  | -1.75803 |
| H  | -3.01723 | 1.22274  | -2.19246 |

**[R-P=C(Pb(II)Cl)-P(O)ClR](AuCl)****Coordination through Pb(II) atom****R = H**

|    |          |          |          |
|----|----------|----------|----------|
| P  | 0.82625  | 0.08960  | 0.83597  |
| C  | 0.43990  | -0.10123 | -0.76223 |
| P  | -1.16184 | -0.22556 | -1.46941 |
| O  | -0.95473 | 0.03880  | -2.93819 |
| Pb | 1.44180  | -0.06541 | -2.84078 |
| Cl | 1.50836  | -2.49219 | -3.08066 |
| Au | 2.75524  | 1.61751  | -4.31006 |
| Cl | 3.91132  | 3.11928  | -5.52527 |
| Cl | -2.48653 | 1.01556  | -0.62389 |
| H  | 2.24762  | 0.15470  | 0.69822  |
| H  | -1.75848 | -1.47008 | -1.21022 |

**R = Me**

|    |          |          |          |
|----|----------|----------|----------|
| P  | 0.84400  | 0.02204  | 0.83673  |
| C  | 0.46128  | -0.10713 | -0.76451 |
| P  | -1.13906 | -0.27436 | -1.47205 |
| O  | -0.91374 | 0.00518  | -2.94371 |
| Pb | 1.44169  | -0.01375 | -2.84028 |
| Cl | 1.60115  | -2.45129 | -3.09808 |
| C  | -1.88510 | -1.86885 | -1.17571 |
| H  | -2.05252 | -2.01780 | -0.10861 |
| H  | -2.83154 | -1.92299 | -1.71622 |
| H  | -1.19551 | -2.62412 | -1.56024 |
| C  | 2.67101  | 0.14324  | 0.88877  |
| H  | 3.13274  | 0.27682  | -0.08960 |
| H  | 2.95051  | 0.97191  | 1.54459  |
| H  | 3.05852  | -0.77162 | 1.34815  |
| Au | 2.72699  | 1.63737  | -4.36937 |
| Cl | 3.86819  | 3.11996  | -5.62653 |
| Cl | -2.44286 | 1.04065  | -0.67473 |

**R = t-Bu**

|    |          |          |          |
|----|----------|----------|----------|
| P  | 0.82212  | -0.24810 | 0.72314  |
| C  | 0.53661  | -0.16788 | -0.90234 |
| P  | -1.00883 | -0.44383 | -1.71200 |
| O  | -0.68185 | -0.23893 | -3.17908 |
| Pb | 1.59593  | 0.28947  | -2.89329 |
| Cl | 2.46217  | -1.97849 | -3.28547 |
| Au | 2.49053  | 2.31568  | -4.24284 |
| Cl | 3.27945  | 4.12839  | -5.33147 |
| C  | 2.62801  | 0.11121  | 1.05047  |
| C  | 3.17182  | -1.16160 | 1.70846  |
| C  | 3.46602  | 0.47936  | -0.15763 |
| C  | 2.62455  | 1.25577  | 2.06918  |
| H  | 2.56996  | -1.46264 | 2.57039  |
| H  | 3.20445  | -1.99656 | 1.00447  |
| H  | 4.19112  | -0.97952 | 2.06365  |
| H  | 3.10147  | 1.38960  | -0.64422 |
| H  | 4.49551  | 0.68481  | 0.15315  |
| H  | 3.51644  | -0.34121 | -0.88026 |
| H  | 3.64571  | 1.43346  | 2.42067  |
| H  | 2.25313  | 2.18604  | 1.63219  |
| H  | 2.00855  | 1.02075  | 2.94139  |
| C  | -1.85092 | -2.04196 | -1.41587 |
| C  | -3.07380 | -2.09258 | -2.33400 |
| C  | -0.85383 | -3.13618 | -1.80924 |
| C  | -2.26060 | -2.18827 | 0.04547  |
| H  | -3.81332 | -1.33496 | -2.06930 |
| H  | -2.79530 | -1.95835 | -3.38042 |
| H  | -3.54356 | -3.07433 | -2.22817 |
| H  | 0.03707  | -3.12664 | -1.17908 |

|    |          |          |          |
|----|----------|----------|----------|
| H  | -1.34484 | -4.10549 | -1.68710 |
| H  | -0.53492 | -3.04383 | -2.84825 |
| H  | -2.72276 | -3.17032 | 0.17883  |
| H  | -1.40384 | -2.13098 | 0.72079  |
| H  | -2.98701 | -1.43090 | 0.34376  |
| Cl | -2.31985 | 0.97532  | -1.09350 |

**R = Ph**

|    |          |          |          |
|----|----------|----------|----------|
| P  | 0.91582  | 0.11942  | 0.80099  |
| C  | 0.47807  | -0.20490 | -0.76216 |
| P  | -1.12129 | -0.37905 | -1.46430 |
| O  | -0.88138 | -0.19743 | -2.94673 |
| Pb | 1.49701  | -0.09849 | -2.80078 |
| Cl | 1.80334  | -2.51563 | -3.16241 |
| Au | 2.70888  | 1.60997  | -4.32884 |
| Cl | 3.78527  | 3.12890  | -5.60381 |
| C  | 2.72328  | 0.16468  | 0.74668  |
| C  | 3.36125  | 1.06982  | 1.59760  |
| C  | 3.49671  | -0.66614 | -0.07082 |
| C  | 4.74200  | 1.18719  | 1.58582  |
| H  | 2.77073  | 1.69709  | 2.25811  |
| C  | 4.87728  | -0.55671 | -0.06696 |
| H  | 3.02198  | -1.43502 | -0.67365 |
| C  | 5.49931  | 0.37800  | 0.75116  |
| H  | 5.22827  | 1.90889  | 2.23168  |
| H  | 5.47012  | -1.20890 | -0.69772 |
| H  | 6.57959  | 0.46522  | 0.74725  |
| C  | -1.92836 | -1.92661 | -1.08886 |
| C  | -1.90979 | -2.91792 | -2.06716 |
| C  | -2.50948 | -2.17049 | 0.15449  |
| C  | -2.48143 | -4.15203 | -1.79788 |
| H  | -1.45016 | -2.71983 | -3.02752 |
| C  | -3.07410 | -3.40608 | 0.41378  |
| H  | -2.52867 | -1.39592 | 0.91283  |
| C  | -3.06041 | -4.39536 | -0.56219 |
| H  | -2.47135 | -4.92423 | -2.55779 |
| H  | -3.53033 | -3.59836 | 1.37762  |
| H  | -3.50620 | -5.36162 | -0.35555 |
| Cl | -2.35581 | 1.04233  | -0.73137 |

**R = Mes**

|    |          |          |          |
|----|----------|----------|----------|
| P  | 1.03272  | -0.17782 | 1.32694  |
| C  | 0.45747  | -0.35234 | -0.21494 |
| P  | -1.09670 | -0.39443 | -1.05173 |
| O  | -0.71804 | 0.10809  | -2.42694 |
| Pb | 1.66105  | 0.08948  | -2.08274 |
| Cl | 1.95330  | -2.22874 | -2.87377 |
| Au | 3.10342  | 1.98894  | -3.10187 |
| Cl | 4.41427  | 3.66972  | -3.85500 |
| C  | 2.81298  | 0.06606  | 0.97679  |
| C  | 3.32090  | 1.37633  | 0.94656  |
| C  | 3.65523  | -1.03387 | 0.75465  |
| C  | 4.66046  | 1.56394  | 0.63812  |
| C  | 4.99152  | -0.79246 | 0.45157  |
| C  | 5.50989  | 0.49383  | 0.37450  |
| H  | 5.05047  | 2.57631  | 0.59344  |
| H  | 5.64658  | -1.63996 | 0.27398  |
| C  | -1.95461 | -1.96969 | -1.03585 |
| C  | -2.22006 | -2.64981 | -2.24739 |
| C  | -2.33819 | -2.54137 | 0.19727  |
| C  | -2.83239 | -3.89570 | -2.17242 |
| C  | -2.93664 | -3.79200 | 0.19891  |
| C  | -3.18689 | -4.49206 | -0.97232 |
| H  | -3.03787 | -4.41859 | -3.10085 |
| H  | -3.22312 | -4.22727 | 1.15115  |
| Cl | -2.36113 | 0.95815  | -0.21372 |

|   |          |          |          |   |          |          |          |
|---|----------|----------|----------|---|----------|----------|----------|
| C | 2.43853  | 2.56179  | 1.20586  | H | -7.72214 | 0.98192  | -0.14096 |
| H | 1.76797  | 2.39318  | 2.05464  | H | -6.58610 | 0.80906  | 1.19576  |
| H | 3.03439  | 3.44965  | 1.41896  | H | -6.89878 | 2.40781  | 0.50952  |
| H | 1.80848  | 2.79212  | 0.34072  | C | -6.04068 | 1.86212  | -2.04620 |
| C | 3.14887  | -2.44362 | 0.83637  | H | -6.97310 | 1.43970  | -2.42768 |
| H | 2.47622  | -2.58207 | 1.68838  | H | -6.20588 | 2.93118  | -1.88755 |
| H | 2.59471  | -2.72331 | -0.06456 | H | -5.28081 | 1.73917  | -2.82177 |
| H | 3.97763  | -3.14398 | 0.94630  | C | -5.50638 | -0.35032 | -1.06261 |
| C | 6.94152  | 0.73398  | 0.00931  | H | -4.71955 | -0.52296 | -1.80103 |
| H | 7.01190  | 1.20237  | -0.97661 | H | -5.26307 | -0.93144 | -0.17065 |
| H | 7.42307  | 1.40845  | 0.72124  | H | -6.44268 | -0.74388 | -1.46724 |
| H | 7.50845  | -0.19714 | -0.01872 | C | -2.59916 | 4.99255  | -1.98809 |
| C | -2.18099 | -1.85610 | 1.52065  | H | -3.54550 | 5.30519  | -1.54057 |
| H | -1.21014 | -1.37482 | 1.64658  | H | -2.09962 | 5.88834  | -2.36375 |
| H | -2.94018 | -1.08141 | 1.65231  | H | -2.81249 | 4.35375  | -2.84810 |
| H | -2.29470 | -2.57702 | 2.33055  | C | -1.35262 | 5.34940  | 0.10499  |
| C | -1.90057 | -2.13728 | -3.62152 | H | -2.25839 | 5.66334  | 0.62947  |
| H | -2.30530 | -1.14163 | -3.79784 | H | -0.64625 | 4.97264  | 0.84787  |
| H | -0.82318 | -2.07558 | -3.78342 | H | -0.90196 | 6.23269  | -0.35593 |
| H | -2.31663 | -2.81899 | -4.36352 | C | -0.40335 | 3.92494  | -1.72903 |
| C | -3.80352 | -5.85458 | -0.94018 | H | 0.39883  | 3.60135  | -1.05969 |
| H | -3.02790 | -6.62207 | -0.85395 | H | -0.58783 | 3.11671  | -2.43825 |
| H | -4.47328 | -5.96965 | -0.08633 | H | -0.02542 | 4.79508  | -2.27375 |
| H | -4.36548 | -6.05932 | -1.85267 | C | 2.96811  | 1.99357  | 2.57219  |

**R = Mes\***

|    |          |          |          |    |          |          |          |
|----|----------|----------|----------|----|----------|----------|----------|
| P  | 0.01610  | 2.43878  | 1.03925  | H  | 2.74197  | 2.59739  | 1.69064  |
| C  | 0.41548  | 0.91920  | 0.50664  | H  | 2.15456  | 1.29150  | 2.74400  |
| P  | 1.88761  | -0.03836 | 0.29832  | H  | 2.98365  | 2.67128  | 3.42940  |
| Cl | -1.27139 | 0.34757  | -2.71795 | C  | 5.35771  | 2.46053  | 2.42540  |
| O  | 1.46525  | -1.02443 | -0.77082 | H  | 5.23094  | 3.07594  | 3.32017  |
| C  | 3.62361  | 0.44237  | 0.04506  | H  | 6.38465  | 2.09491  | 2.41279  |
| C  | 4.13921  | 0.20461  | -1.26465 | H  | 5.21570  | 3.09910  | 1.55019  |
| C  | 4.53529  | 0.54255  | 1.12853  | C  | 4.58135  | 0.45560  | 3.68736  |
| C  | 5.42723  | -0.29869 | -1.35892 | H  | 5.58335  | 0.02296  | 3.68436  |
| C  | 5.81969  | 0.04192  | 0.94047  | H  | 4.49467  | 1.07581  | 4.58361  |
| C  | 6.26101  | -0.48074 | -0.26331 | H  | 3.86219  | -0.35890 | 3.76831  |
| H  | 5.80007  | -0.55147 | -2.34275 | C  | 2.27520  | 1.53223  | -2.41236 |
| H  | 6.50039  | 0.07021  | 1.77948  | H  | 1.96855  | 1.91531  | -3.38838 |
| C  | -1.80421 | 2.39584  | 0.78169  | H  | 1.39460  | 1.05053  | -1.99730 |
| C  | -2.36301 | 3.09700  | -0.31136 | H  | 2.54575  | 2.38940  | -1.78981 |
| C  | -2.61044 | 1.51243  | 1.54164  | C  | 3.05732  | -0.63561 | -3.41770 |
| C  | -3.61631 | 2.69470  | -0.76507 | H  | 2.30551  | -1.22829 | -2.90116 |
| C  | -3.83305 | 1.12819  | 0.99736  | H  | 2.64770  | -0.31382 | -4.37893 |
| C  | -4.33552 | 1.66031  | -0.18355 | H  | 3.92192  | -1.27304 | -3.61975 |
| H  | -4.03449 | 3.18930  | -1.62678 | C  | 4.49054  | 1.39919  | -3.41256 |
| H  | -4.43148 | 0.40361  | 1.53495  | H  | 4.85931  | 2.25975  | -2.84885 |
| C  | -1.67948 | 4.30781  | -0.97410 | H  | 5.34905  | 0.80629  | -3.72832 |
| C  | -2.31642 | 1.06465  | 2.99128  | H  | 4.00367  | 1.76991  | -4.31785 |
| C  | -5.65195 | 1.14505  | -0.75600 | C  | 8.37636  | -1.26553 | 0.88669  |
| C  | 4.32416  | 1.31491  | 2.44633  | H  | 8.61574  | -0.28806 | 1.31336  |
| C  | 3.46211  | 0.59049  | -2.59506 | H  | 7.80911  | -1.83625 | 1.62616  |
| C  | 7.62169  | -1.14356 | -0.43438 | H  | 9.32108  | -1.78774 | 0.71888  |
| C  | -3.59325 | 1.28169  | 3.82411  | C  | 8.47752  | -0.32296 | -1.40679 |
| H  | -3.37630 | 1.07542  | 4.87510  | H  | 8.01461  | -0.24758 | -2.39258 |
| H  | -3.94744 | 2.31211  | 3.74409  | H  | 8.63548  | 0.69084  | -1.03073 |
| H  | -4.40664 | 0.61917  | 3.52847  | H  | 9.45553  | -0.79502 | -1.53367 |
| C  | -1.23546 | 1.90054  | 3.67494  | C  | 7.41406  | -2.55228 | -1.00388 |
| H  | -0.23046 | 1.69984  | 3.29241  | H  | 6.81534  | -3.16474 | -0.32562 |
| H  | -1.43503 | 2.97193  | 3.59141  | H  | 6.90498  | -2.52791 | -1.96931 |
| H  | -1.20500 | 1.64897  | 4.73849  | H  | 8.37970  | -3.04484 | -1.14618 |
| C  | -1.93352 | -0.41415 | 3.07910  | Au | -2.32491 | -2.77951 | -0.02340 |
| H  | -2.67500 | -1.05407 | 2.59505  | Cl | -3.60760 | -4.57959 | 0.46413  |
| H  | -0.95989 | -0.60464 | 2.62234  | Pb | -0.89832 | -0.66033 | -0.49528 |
| H  | -1.86531 | -0.72165 | 4.12645  | Cl | 1.96322  | -1.16355 | 2.01623  |
| C  | -6.77637 | 1.34924  | 0.26625  |    |          |          |          |

**Coordination through O atom****R= H**

|    |          |          |          |
|----|----------|----------|----------|
| P  | 0.84877  | 0.08847  | 1.00871  |
| C  | 0.57903  | -0.13388 | -0.61043 |
| P  | -0.96185 | -0.01132 | -1.38567 |
| O  | -0.62575 | 0.43645  | -2.81132 |
| Pb | 1.81260  | -0.29252 | -2.66548 |
| Cl | 1.17284  | -2.66380 | -2.94281 |
| Au | -2.00955 | 0.70978  | -4.37607 |
| Cl | -3.44059 | 1.00763  | -6.04838 |
| Cl | -2.28292 | 1.21647  | -0.52203 |
| H  | 2.26833  | -0.10522 | 1.01343  |
| H  | -1.65778 | -1.22878 | -1.38987 |

**R = Me**

|    |          |          |          |
|----|----------|----------|----------|
| P  | 0.84716  | 0.02016  | 1.00575  |
| C  | 0.58394  | -0.13384 | -0.61882 |
| P  | -0.97649 | -0.02727 | -1.36347 |
| O  | -0.64266 | 0.39300  | -2.80946 |
| Pb | 1.77533  | -0.17715 | -2.70163 |
| Cl | 1.35674  | -2.60755 | -3.02204 |
| C  | -1.90450 | -1.54937 | -1.32721 |
| H  | -2.15733 | -1.80215 | -0.29686 |
| H  | -2.81207 | -1.42902 | -1.92186 |
| H  | -1.27040 | -2.32525 | -1.76397 |
| C  | 2.65425  | -0.21871 | 1.22192  |
| H  | 3.20386  | -0.29483 | 0.28362  |
| H  | 3.05227  | 0.60510  | 1.82079  |
| H  | 2.80889  | -1.13441 | 1.80138  |
| Au | -2.02981 | 0.63261  | -4.37012 |
| Cl | -3.47511 | 0.89014  | -6.03896 |
| Cl | -2.20008 | 1.34283  | -0.53878 |

**R = t-Bu**

|    |          |          |          |
|----|----------|----------|----------|
| P  | 0.91268  | -0.55250 | 0.93666  |
| C  | 0.48729  | -0.09767 | -0.59635 |
| P  | -1.15988 | -0.10107 | -1.16404 |
| O  | -1.05556 | 0.61215  | -2.52671 |
| Pb | 1.42041  | 0.94688  | -2.54784 |
| Cl | 2.05271  | -1.20915 | -3.62991 |
| Au | -2.48630 | 1.50736  | -3.77270 |
| Cl | -3.95035 | 2.48857  | -5.12824 |
| C  | 2.77285  | -0.41805 | 1.10038  |
| C  | 3.25659  | -1.85566 | 1.31933  |
| C  | 3.49496  | 0.20394  | -0.07876 |
| C  | 3.01314  | 0.40312  | 2.37018  |
| H  | 2.72922  | -2.33879 | 2.14659  |
| H  | 3.12068  | -2.46640 | 0.42358  |
| H  | 4.32332  | -1.84955 | 1.56620  |
| H  | 3.16255  | 1.23358  | -0.25200 |
| H  | 4.57078  | 0.25217  | 0.12033  |
| H  | 3.36807  | -0.39384 | -0.98701 |
| H  | 4.08120  | 0.40820  | 2.60996  |
| H  | 2.69066  | 1.44061  | 2.24893  |
| H  | 2.48128  | -0.01614 | 3.22842  |
| C  | -1.99430 | -1.72658 | -1.31818 |
| C  | -3.39039 | -1.52820 | -1.90962 |
| C  | -1.13490 | -2.56975 | -2.26489 |
| C  | -2.08903 | -2.38941 | 0.05342  |
| H  | -4.03252 | -0.93519 | -1.25683 |
| H  | -3.35900 | -1.04957 | -2.89036 |
| H  | -3.84976 | -2.51314 | -2.03121 |
| H  | -0.12344 | -2.72065 | -1.88438 |
| H  | -1.60889 | -3.54928 | -2.37151 |
| H  | -1.05906 | -2.12119 | -3.25627 |

|    |          |          |          |
|----|----------|----------|----------|
| H  | -2.55973 | -3.36826 | -0.07194 |
| H  | -1.10735 | -2.54784 | 0.50462  |
| H  | -2.69985 | -1.80930 | 0.74722  |
| Cl | -2.35032 | 1.00683  | 0.04170  |

**R = Ph**

|    |          |          |          |
|----|----------|----------|----------|
| P  | 0.81997  | 0.26792  | 0.92298  |
| C  | 0.54382  | -0.22435 | -0.63333 |
| P  | -0.94397 | -0.18155 | -1.50909 |
| O  | -0.48059 | -0.04563 | -2.96840 |
| Pb | 1.99889  | -0.39168 | -2.50378 |
| Cl | 1.87995  | -2.87108 | -2.74566 |
| Au | -1.67552 | 0.18293  | -4.67973 |
| Cl | -2.89248 | 0.42846  | -6.52532 |
| C  | 2.59667  | -0.04494 | 1.13219  |
| C  | 3.27280  | -1.10288 | 0.51381  |
| C  | 3.30638  | 0.81317  | 1.97419  |
| C  | 4.63609  | -1.26723 | 0.70275  |
| H  | 2.71920  | -1.83240 | -0.07127 |
| C  | 4.67232  | 0.65407  | 2.15009  |
| H  | 2.78583  | 1.61872  | 2.48301  |
| C  | 5.33824  | -0.38256 | 1.51168  |
| H  | 5.14817  | -2.09743 | 0.22970  |
| H  | 5.21765  | 1.33686  | 2.79139  |
| H  | 6.40429  | -0.51284 | 1.65809  |
| C  | -1.98225 | -1.61394 | -1.27846 |
| C  | -2.86396 | -1.70227 | -0.20221 |
| C  | -1.84333 | -2.67829 | -2.16744 |
| C  | -3.60958 | -2.85321 | -0.02285 |
| H  | -2.97632 | -0.87165 | 0.48476  |
| C  | -2.59784 | -3.82526 | -1.97949 |
| H  | -1.15138 | -2.61285 | -2.99778 |
| C  | -3.47754 | -3.91262 | -0.91176 |
| H  | -4.30147 | -2.92185 | 0.80814  |
| H  | -2.49715 | -4.65005 | -2.67450 |
| H  | -4.06826 | -4.81056 | -0.77115 |
| Cl | -2.09597 | 1.40062  | -1.01427 |

**R = Mes**

|    |          |          |          |
|----|----------|----------|----------|
| P  | 0.71383  | -0.01967 | 1.36234  |
| C  | 0.37362  | -0.34172 | -0.22212 |
| P  | -1.03561 | -0.25823 | -1.22640 |
| O  | -0.43168 | 0.14269  | -2.57936 |
| Pb | 2.05115  | -0.19630 | -1.87612 |
| Cl | 2.11440  | -2.63997 | -2.39790 |
| Au | -1.08856 | 1.41592  | -4.11456 |
| Cl | -1.69973 | 2.77214  | -5.76897 |
| C  | 2.54781  | -0.13683 | 1.33487  |
| C  | 3.19179  | -1.38608 | 1.37003  |
| C  | 3.30029  | 1.05017  | 1.33478  |
| C  | 4.58163  | -1.41752 | 1.35828  |
| C  | 4.68736  | 0.96574  | 1.32094  |
| C  | 5.34715  | -0.25762 | 1.32422  |
| H  | 5.08049  | -2.38164 | 1.38881  |
| H  | 5.26813  | 1.88348  | 1.31848  |
| C  | -2.01966 | -1.75827 | -1.27481 |
| C  | -2.66777 | -2.17360 | -0.08961 |
| C  | -2.11645 | -2.54334 | -2.44829 |
| C  | -3.38012 | -3.36359 | -0.09686 |
| C  | -2.85499 | -3.71879 | -2.38525 |
| C  | -3.49178 | -4.15126 | -1.23222 |
| H  | -3.86614 | -3.68001 | 0.82070  |
| H  | -2.92553 | -4.32321 | -3.28365 |
| Cl | -2.28609 | 1.25013  | -0.69296 |
| C  | 2.63240  | 2.39458  | 1.34267  |
| H  | 2.14789  | 2.61658  | 0.38653  |

|   |          |          |          |
|---|----------|----------|----------|
| H | 1.85367  | 2.45312  | 2.10954  |
| H | 3.35551  | 3.18720  | 1.53748  |
| C | 2.41817  | -2.66920 | 1.43347  |
| H | 1.59244  | -2.60575 | 2.14831  |
| H | 1.98724  | -2.92307 | 0.46072  |
| H | 3.06506  | -3.49309 | 1.73691  |
| C | 6.84263  | -0.32707 | 1.28448  |
| H | 7.19627  | -0.46858 | 0.25847  |
| H | 7.29483  | 0.59038  | 1.66409  |
| H | 7.21727  | -1.16561 | 1.87433  |
| C | -2.67225 | -1.38989 | 1.18872  |
| H | -1.70762 | -0.94109 | 1.42911  |
| H | -3.40086 | -0.57690 | 1.14512  |
| H | -2.94728 | -2.03938 | 2.02024  |
| C | -1.48330 | -2.21987 | -3.76873 |
| H | -1.82768 | -1.26445 | -4.16906 |
| H | -0.39620 | -2.17337 | -3.69557 |
| H | -1.73768 | -2.99637 | -4.48978 |
| C | -4.29400 | -5.41378 | -1.22300 |
| H | -4.35475 | -5.84097 | -0.22093 |
| H | -5.31677 | -5.21874 | -1.56046 |
| H | -3.86701 | -6.16091 | -1.89409 |

|    |          |          |          |
|----|----------|----------|----------|
| C  | 6.19468  | -2.20720 | 1.53389  |
| H  | 6.11262  | -1.60436 | 2.43995  |
| H  | 5.23320  | -2.70341 | 1.38502  |
| H  | 6.95475  | -2.97350 | 1.70893  |
| C  | 7.92441  | -0.67216 | 0.58026  |
| H  | 7.88217  | -0.02452 | 1.45826  |
| H  | 8.70015  | -1.42241 | 0.75635  |
| H  | 8.22843  | -0.06183 | -0.27390 |
| C  | -2.36201 | 1.41229  | 0.28123  |
| C  | -2.94943 | 0.83663  | 1.44726  |
| C  | -3.17730 | 2.19635  | -0.57565 |
| C  | -4.32963 | 0.72592  | 1.47543  |
| C  | -4.55491 | 2.03838  | -0.47174 |
| C  | -5.15481 | 1.22010  | 0.47256  |
| H  | -4.78128 | 0.22587  | 2.32267  |
| H  | -5.18096 | 2.58676  | -1.16185 |
| C  | -2.20747 | 0.48091  | 2.75078  |
| C  | -2.31088 | -1.00220 | 3.11131  |
| C  | -2.88792 | 1.30119  | 3.86639  |
| H  | -1.76642 | -1.62502 | 2.40229  |
| H  | -1.88269 | -1.16741 | 4.10366  |
| H  | -3.34835 | -1.34200 | 3.13188  |
| H  | -2.86331 | 2.37032  | 3.64099  |
| H  | -3.92693 | 1.01355  | 4.02790  |
| H  | -2.35020 | 1.13824  | 4.80392  |
| C  | -2.70366 | 3.35447  | -1.47609 |
| C  | -3.35375 | 4.62256  | -0.88333 |
| C  | -3.16609 | 3.21392  | -2.92862 |
| H  | -3.05781 | 4.76290  | 0.15907  |
| H  | -3.02362 | 5.49610  | -1.45219 |
| H  | -4.44265 | 4.58728  | -0.92288 |
| H  | -2.71846 | 2.34704  | -3.41334 |
| H  | -4.25073 | 3.11764  | -3.00226 |
| H  | -2.87641 | 4.10561  | -3.49126 |
| C  | -6.64886 | 0.93042  | 0.49538  |
| C  | -7.27133 | 1.53918  | 1.75777  |
| C  | -6.85351 | -0.58979 | 0.50633  |
| H  | -7.13830 | 2.62393  | 1.77965  |
| H  | -8.34357 | 1.32687  | 1.78386  |
| H  | -6.82920 | 1.12669  | 2.66688  |
| H  | -6.40256 | -1.06190 | -0.36899 |
| H  | -6.40925 | -1.05384 | 1.38871  |
| H  | -7.92248 | -0.81971 | 0.51059  |
| Cl | 2.18325  | -1.44677 | 2.21666  |
| O  | -0.93774 | -0.89041 | 0.14358  |
| Cl | -1.19537 | 0.39488  | -2.35896 |
| Au | -2.51832 | -2.20725 | -0.31500 |
| Cl | -4.16174 | -3.63697 | -0.79988 |
| C  | -1.20239 | 3.61218  | -1.43773 |
| H  | -0.83562 | 3.68963  | -0.41156 |
| H  | -0.62382 | 2.85565  | -1.96369 |
| H  | -0.99022 | 4.56523  | -1.92873 |
| C  | -0.74576 | 0.91166  | 2.76257  |
| H  | -0.10288 | 0.28840  | 2.14447  |
| H  | -0.63572 | 1.95670  | 2.46115  |
| H  | -0.35468 | 0.81788  | 3.77844  |
| C  | -7.36548 | 1.50540  | -0.72347 |
| H  | -7.31878 | 2.59743  | -0.75178 |
| H  | -6.95033 | 1.11528  | -1.65597 |
| H  | -8.42091 | 1.22599  | -0.68854 |
| Pb | 1.60702  | -1.33172 | -0.21863 |

**R = Mes\***

|   |          |          |          |
|---|----------|----------|----------|
| P | 1.72102  | 2.31195  | -0.18726 |
| C | 0.82149  | 0.92373  | -0.24172 |
| P | -0.87610 | 0.57350  | -0.33864 |
| C | 3.41059  | 1.55931  | -0.20361 |
| C | 4.17995  | 1.54676  | 0.98832  |
| C | 3.84945  | 0.81862  | -1.32388 |
| C | 5.19810  | 0.61023  | 1.09270  |
| C | 4.85333  | -0.13785 | -1.12464 |
| C | 5.50835  | -0.29708 | 0.08387  |
| H | 5.76268  | 0.55983  | 2.01193  |
| H | 5.15430  | -0.74594 | -1.96722 |
| C | 3.47079  | 1.09129  | -2.79847 |
| C | 3.96288  | 2.54743  | 2.13796  |
| C | 6.57867  | -1.35840 | 0.31605  |
| C | 2.63539  | 2.31601  | 2.86619  |
| H | 1.76971  | 2.55456  | 2.24289  |
| H | 2.53417  | 1.27784  | 3.18677  |
| H | 2.58172  | 2.96588  | 3.74452  |
| C | 4.01290  | 3.97629  | 1.58007  |
| H | 4.97089  | 4.16946  | 1.09087  |
| H | 3.21842  | 4.16997  | 0.85652  |
| H | 3.89524  | 4.69625  | 2.39460  |
| C | 5.06637  | 2.44579  | 3.19387  |
| H | 5.04383  | 1.49062  | 3.72351  |
| H | 6.06155  | 2.58685  | 2.76513  |
| H | 4.91256  | 3.23189  | 3.93639  |
| C | 2.81528  | -0.12290 | -3.46154 |
| H | 1.81582  | -0.30457 | -3.05796 |
| H | 2.69970  | 0.05393  | -4.53440 |
| H | 3.41157  | -1.02987 | -3.33996 |
| C | 2.57096  | 2.30457  | -3.02254 |
| H | 1.53881  | 2.12898  | -2.71831 |
| H | 2.94870  | 3.19449  | -2.51102 |
| H | 2.54634  | 2.53384  | -4.09156 |
| C | 4.78517  | 1.40683  | -3.53905 |
| H | 5.29278  | 2.26019  | -3.08295 |
| H | 5.47874  | 0.56585  | -3.54029 |
| H | 4.56600  | 1.65733  | -4.58020 |
| C | 6.74110  | -2.28798 | -0.88365 |
| H | 7.08136  | -1.75375 | -1.77464 |
| H | 7.49015  | -3.04941 | -0.65478 |
| H | 5.80919  | -2.80596 | -1.12532 |

**Coordination through P(sp<sup>2</sup>) atom****R = H**

|    |          |          |          |
|----|----------|----------|----------|
| P  | 0.70535  | 0.09431  | 0.86507  |
| C  | 0.43930  | -0.22943 | -0.71387 |
| P  | -1.07866 | -0.27753 | -1.56076 |
| O  | -0.74098 | -0.09578 | -3.01909 |
| Pb | 1.62465  | -0.48751 | -2.83366 |
| Cl | 1.34742  | -2.95095 | -2.76806 |
| Au | -0.58472 | 0.57679  | 2.57750  |
| Cl | -1.89374 | 1.06734  | 4.34777  |
| Cl | -2.42307 | 1.06999  | -0.92886 |
| H  | 2.10427  | 0.01539  | 1.04435  |
| H  | -1.75391 | -1.48003 | -1.29849 |

**R = Me**

|    |          |          |          |
|----|----------|----------|----------|
| P  | 0.80736  | 0.13245  | 0.80916  |
| C  | 0.48623  | -0.15291 | -0.76470 |
| P  | -1.08496 | -0.29468 | -1.51087 |
| O  | -0.81073 | -0.28137 | -3.00084 |
| Pb | 1.54324  | -0.51275 | -2.91973 |
| Cl | 1.45050  | -2.98832 | -2.60824 |
| Cl | -1.97331 | -1.75075 | -0.98544 |
| H  | -2.19009 | -1.69666 | 0.08223  |
| H  | -2.90182 | -1.82255 | -1.55424 |
| H  | -1.33709 | -2.61236 | -1.20209 |
| C  | 2.58771  | 0.11689  | 1.13268  |
| H  | 3.15702  | -0.07248 | 0.22371  |
| H  | 2.87783  | 1.07487  | 1.57064  |
| H  | 2.79907  | -0.66036 | 1.87130  |
| Au | -0.55994 | 0.47158  | 2.50762  |
| Cl | -1.95522 | 0.78663  | 4.25927  |
| Cl | -2.29996 | 1.24142  | -1.01853 |

**R = *t*-Bu**

|    |          |          |          |
|----|----------|----------|----------|
| P  | 0.76640  | 0.08766  | 0.91443  |
| C  | 0.47641  | -0.16748 | -0.67354 |
| P  | -1.06272 | -0.35743 | -1.48556 |
| O  | -0.74057 | -0.17920 | -2.95809 |
| Pb | 1.60959  | 0.09829  | -2.80776 |
| Cl | 2.29386  | -2.29705 | -3.01871 |
| Au | -0.64819 | 0.29918  | 2.60713  |
| Cl | -2.07849 | 0.52479  | 4.35052  |
| C  | 2.56849  | 0.19814  | 1.33309  |
| C  | 2.86482  | -1.00563 | 2.23464  |
| C  | 3.46183  | 0.16966  | 0.10460  |
| C  | 2.77024  | 1.49546  | 2.11915  |
| H  | 2.20979  | -1.02690 | 3.10901  |
| H  | 2.75499  | -1.94986 | 1.69644  |
| H  | 3.89694  | -0.93585 | 2.59131  |
| H  | 3.29171  | 1.04247  | -0.53351 |
| H  | 4.50890  | 0.20684  | 0.42000  |
| H  | 3.32777  | -0.74548 | -0.47787 |
| H  | 3.80728  | 1.54641  | 2.46388  |
| H  | 2.57340  | 2.37772  | 1.50515  |
| H  | 2.12175  | 1.54080  | 2.99722  |
| C  | -1.96153 | -1.92636 | -1.18527 |
| C  | -3.18591 | -1.92679 | -2.10358 |
| C  | -1.01185 | -3.06060 | -1.57998 |
| C  | -2.37952 | -2.06607 | 0.27311  |
| H  | -3.90336 | -1.15301 | -1.82567 |
| H  | -2.90481 | -1.78545 | -3.14841 |
| H  | -3.68273 | -2.89651 | -2.01126 |
| H  | -0.11219 | -3.07844 | -0.96246 |
| H  | -1.53738 | -4.00937 | -1.44017 |
| H  | -0.70161 | -2.99245 | -2.62317 |

|    |          |          |          |
|----|----------|----------|----------|
| H  | -2.91861 | -3.01045 | 0.38949  |
| H  | -1.51965 | -2.09572 | 0.94531  |
| H  | -3.04095 | -1.26067 | 0.59559  |
| Cl | -2.34090 | 1.10896  | -0.90081 |

**R = Ph**

|    |          |          |          |
|----|----------|----------|----------|
| P  | 0.80165  | 0.28984  | 0.48061  |
| C  | 0.64000  | -0.49824 | -0.94161 |
| P  | -0.80753 | -0.84933 | -1.84301 |
| O  | -0.31472 | -1.29134 | -3.20514 |
| Pb | 2.02437  | -1.20616 | -2.78365 |
| Cl | 2.21394  | -3.57493 | -1.99678 |
| Au | -0.71276 | 1.32594  | 1.71358  |
| Cl | -2.28806 | 2.35791  | 2.97077  |
| C  | 2.50379  | 0.25942  | 1.03087  |
| C  | 2.95179  | 1.28780  | 1.86099  |
| C  | 3.37307  | -0.77460 | 0.67228  |
| C  | 4.26811  | 1.30566  | 2.29163  |
| H  | 2.26691  | 2.07357  | 2.16301  |
| C  | 4.68352  | -0.75552 | 1.11688  |
| H  | 3.01005  | -1.61496 | 0.08882  |
| C  | 5.13353  | 0.28761  | 1.91726  |
| H  | 4.61647  | 2.11174  | 2.92644  |
| H  | 5.35217  | -1.56576 | 0.85046  |
| H  | 6.16057  | 0.29730  | 2.26389  |
| C  | -1.85083 | -2.07466 | -1.06906 |
| C  | -2.75171 | -1.74558 | -0.05739 |
| C  | -1.68615 | -3.40068 | -1.46540 |
| C  | -3.48921 | -2.74551 | 0.55156  |
| H  | -2.88392 | -0.71441 | 0.24988  |
| C  | -2.43212 | -4.39363 | -0.85025 |
| H  | -0.97700 | -3.64875 | -2.24571 |
| C  | -3.33007 | -4.06723 | 0.15482  |
| H  | -4.19185 | -2.49112 | 1.33610  |
| H  | -2.30807 | -5.42510 | -1.15803 |
| H  | -3.91159 | -4.84689 | 0.63358  |
| Cl | -1.96802 | 0.79818  | -2.01895 |

**R = Mes**

|    |          |          |          |
|----|----------|----------|----------|
| P  | 0.71475  | 0.51227  | 1.03246  |
| C  | 0.41194  | -0.41769 | -0.27401 |
| P  | -0.90420 | -0.69213 | -1.38184 |
| O  | -0.20422 | -0.69308 | -2.72587 |
| Pb | 2.05594  | -0.88255 | -1.95456 |
| Cl | 1.99400  | -3.36822 | -1.65113 |
| Au | -0.57789 | 1.74075  | 2.34036  |
| Cl | -1.86898 | 3.00515  | 3.70605  |
| C  | 2.49268  | 0.45430  | 1.34735  |
| C  | 3.26072  | 1.60893  | 1.11831  |
| C  | 3.08507  | -0.72010 | 1.84243  |
| C  | 4.62666  | 1.55351  | 1.35781  |
| C  | 4.45574  | -0.71723 | 2.07168  |
| C  | 5.24421  | 0.40074  | 1.82943  |
| H  | 5.22453  | 2.44183  | 1.17781  |
| H  | 4.91848  | -1.61803 | 2.46301  |
| C  | -1.87405 | -2.16770 | -1.05323 |
| C  | -2.45239 | -2.35306 | 0.22028  |
| C  | -2.06553 | -3.13609 | -2.06574 |
| C  | -3.18468 | -3.50561 | 0.46451  |
| C  | -2.80985 | -4.26715 | -1.75356 |
| C  | -3.36866 | -4.48155 | -0.50272 |
| H  | -3.63118 | -3.63578 | 1.44532  |
| H  | -2.96179 | -5.00816 | -2.53184 |
| Cl | -2.23078 | 0.85310  | -1.38284 |
| C  | 2.64122  | 2.88465  | 0.63014  |
| H  | 2.08349  | 2.74114  | -0.29999 |



|   |          |          |          |
|---|----------|----------|----------|
| H | 1.93643  | 3.29040  | 1.36266  |
| H | 3.40529  | 3.64046  | 0.44710  |
| C | 2.28897  | -1.95450 | 2.14649  |
| H | 1.37750  | -1.71817 | 2.70311  |
| H | 1.98623  | -2.47679 | 1.23453  |
| H | 2.87768  | -2.64712 | 2.74860  |
| C | 6.72336  | 0.36138  | 2.05753  |
| H | 7.24562  | 0.05106  | 1.14703  |
| H | 7.10961  | 1.34301  | 2.33692  |
| H | 6.98625  | -0.34939 | 2.84250  |
| C | -2.31516 | -1.37725 | 1.34834  |
| H | -3.08404 | -1.56038 | 2.09916  |
| H | -1.34542 | -1.48387 | 1.84167  |
| H | -2.40905 | -0.33813 | 1.03216  |
| C | -1.53348 | -3.04660 | -3.46670 |
| H | -1.78430 | -2.10387 | -3.95102 |
| H | -0.44570 | -3.13366 | -3.47931 |
| H | -1.94657 | -3.86310 | -4.05956 |
| C | -4.13419 | -5.73176 | -0.20418 |
| H | -4.63464 | -6.11503 | -1.09496 |
| H | -3.45959 | -6.51552 | 0.15459  |
| H | -4.88399 | -5.56515 | 0.57088  |

**R = Mes\***

|    |          |          |          |
|----|----------|----------|----------|
| P  | -0.90808 | 1.18045  | 0.07241  |
| C  | -0.17986 | 0.24764  | 0.38936  |
| P  | 1.39869  | -0.98582 | 0.49086  |
| Cl | -1.83137 | -2.66424 | -2.03183 |
| O  | 1.16121  | -2.36998 | -0.07923 |
| C  | 3.06830  | -0.43992 | 0.02203  |
| C  | 3.59307  | -1.06324 | -1.14897 |
| C  | 3.97011  | 0.12932  | 0.95893  |
| C  | 4.93407  | -1.41342 | -1.13829 |
| C  | 5.30467  | -0.25959 | 0.88401  |
| C  | 5.79652  | -1.10598 | -0.09448 |
| H  | 5.32421  | -1.94759 | -1.99486 |
| H  | 5.98502  | 0.13141  | 1.62698  |
| C  | -2.69441 | 0.80389  | 0.10930  |
| C  | -3.42797 | 0.64720  | -1.09502 |
| C  | -3.25405 | 0.37832  | 1.34065  |
| C  | -4.57450 | -0.14091 | -1.04897 |
| C  | -4.38253 | -0.43482 | 1.28847  |
| C  | -5.03108 | -0.75669 | 0.10581  |
| H  | -5.11402 | -0.31029 | -1.96558 |
| H  | -4.78329 | -0.81466 | 2.21983  |
| C  | -3.08477 | 1.35252  | -2.42070 |
| C  | -2.81494 | 0.81969  | 2.75461  |
| C  | -6.21572 | -1.71720 | 0.11739  |
| C  | 3.68656  | 1.27792  | 1.94877  |
| C  | 2.85690  | -1.26622 | -2.48887 |
| C  | 7.23074  | -1.61989 | -0.10628 |
| C  | -4.05969 | 1.37302  | 3.47450  |
| H  | -3.77132 | 1.74005  | 4.46263  |
| H  | -4.49459 | 2.20577  | 2.91688  |
| H  | -4.83699 | 0.62291  | 3.61927  |
| C  | -1.79195 | 1.95315  | 2.78985  |
| H  | -0.78668 | 1.63563  | 2.51054  |
| H  | -2.08669 | 2.79430  | 2.15736  |
| H  | -1.71594 | 2.32873  | 3.81382  |
| C  | -2.26543 | -0.36353 | 3.55638  |
| H  | -2.97948 | -1.18932 | 3.59897  |
| H  | -1.33200 | -0.73195 | 3.12499  |
| H  | -2.05387 | -0.05432 | 4.58381  |
| C  | -7.32324 | -1.16424 | 1.02170  |
| H  | -8.17516 | -1.84951 | 1.03259  |
| H  | -6.98549 | -1.03943 | 2.05260  |

|    |          |          |          |
|----|----------|----------|----------|
| H  | -7.67291 | -0.19320 | 0.66280  |
| C  | -6.79727 | -1.93693 | -1.27664 |
| H  | -7.62338 | -2.64941 | -1.21690 |
| H  | -7.19257 | -1.01202 | -1.70424 |
| H  | -6.05458 | -2.34721 | -1.96499 |
| C  | -5.74456 | -3.07285 | 0.65829  |
| H  | -4.96707 | -3.49736 | 0.01781  |
| H  | -5.34412 | -2.98760 | 1.67115  |
| H  | -6.58009 | -3.77747 | 0.68884  |
| C  | -4.09319 | 1.02096  | -3.52502 |
| H  | -5.11252 | 1.30990  | -3.25869 |
| H  | -3.82021 | 1.58422  | -4.41980 |
| H  | -4.08164 | -0.03954 | -3.78784 |
| C  | -3.16431 | 2.86757  | -2.18958 |
| H  | -4.16610 | 3.15625  | -1.86135 |
| H  | -2.45268 | 3.21197  | -1.43606 |
| H  | -2.94155 | 3.40011  | -3.11782 |
| C  | -1.71202 | 0.96572  | -2.97671 |
| H  | -0.88167 | 1.32742  | -2.36715 |
| H  | -1.61731 | -0.11622 | -3.07675 |
| H  | -1.58164 | 1.42361  | -3.96122 |
| C  | 2.26249  | 1.81413  | 1.91877  |
| H  | 1.94944  | 2.03013  | 0.89467  |
| H  | 1.53744  | 1.14942  | 2.38238  |
| H  | 2.22421  | 2.76000  | 2.46389  |
| C  | 4.57081  | 2.45364  | 1.48035  |
| H  | 4.39416  | 3.31584  | 2.12846  |
| H  | 5.63431  | 2.21630  | 1.51775  |
| H  | 4.32206  | 2.74658  | 0.45789  |
| C  | 4.07152  | 0.92676  | 3.38885  |
| H  | 5.12285  | 0.64606  | 3.47525  |
| H  | 3.91182  | 1.79858  | 4.02892  |
| H  | 3.46956  | 0.10578  | 3.77792  |
| C  | 1.50689  | -0.55882 | -2.57295 |
| H  | 1.18410  | -0.53627 | -3.61645 |
| H  | 0.71808  | -1.07156 | -2.02814 |
| H  | 1.57668  | 0.47803  | -2.23174 |
| C  | 2.68860  | -2.74977 | -2.82707 |
| H  | 2.05956  | -3.24780 | -2.09099 |
| H  | 2.22002  | -2.85220 | -3.80961 |
| H  | 3.65396  | -3.26069 | -2.86292 |
| C  | 3.72661  | -0.60643 | -3.57880 |
| H  | 3.88922  | 0.45300  | -3.36587 |
| H  | 4.70057  | -1.08177 | -3.69557 |
| H  | 3.20829  | -0.68358 | -4.53778 |
| C  | 8.01083  | -1.18811 | 1.13249  |
| H  | 8.12236  | -0.10227 | 1.18774  |
| H  | 7.53335  | -1.53356 | 2.05286  |
| H  | 9.01479  | -1.61763 | 1.09828  |
| C  | 7.95967  | -1.08817 | -1.34614 |
| H  | 7.47939  | -1.41302 | -2.27113 |
| H  | 7.98611  | 0.00418  | -1.34686 |
| H  | 8.99010  | -1.45378 | -1.35984 |
| C  | 7.20479  | -3.15255 | -0.15024 |
| H  | 6.70012  | -3.56071 | 0.72871  |
| H  | 6.68528  | -3.52321 | -1.03604 |
| H  | 8.22529  | -3.54464 | -0.17097 |
| Au | -0.04250 | 3.18851  | -0.35134 |
| Cl | 0.85582  | 5.23378  | -0.75970 |
| Pb | -1.20566 | -2.45986 | 0.39070  |
| Cl | 1.56182  | -1.35197 | 2.51918  |

**Coordination through  $\pi(\text{C}=\text{P})$  bond****R = H**

|    |          |          |          |
|----|----------|----------|----------|
| P  | 0.74223  | -0.08108 | 0.95638  |
| C  | 0.38133  | 0.10628  | -0.71677 |
| P  | -1.15523 | -0.23261 | -1.48243 |
| O  | -0.99795 | 0.12839  | -2.93782 |
| Pb | 1.41125  | 0.07018  | -2.95643 |
| Cl | 1.47272  | -2.41983 | -2.92198 |
| Au | 0.57405  | 2.11127  | 0.01859  |
| Cl | 0.71885  | 4.35007  | 0.15667  |
| Cl | -2.75907 | 0.66556  | -0.66780 |
| H  | -1.47275 | -1.58588 | -1.28238 |
| H  | 2.16828  | -0.10220 | 0.86011  |

**R = Me**

|    |          |          |          |
|----|----------|----------|----------|
| P  | 0.76688  | 0.06467  | 0.86292  |
| C  | 0.32686  | 0.23411  | -0.78865 |
| P  | -1.22301 | -0.21131 | -1.48731 |
| O  | -1.06379 | -0.01753 | -2.98080 |
| Pb | 1.30744  | 0.11867  | -3.03223 |
| Cl | 1.66132  | -2.35609 | -2.80575 |
| C  | -1.66673 | -1.88812 | -1.05758 |
| H  | -1.82796 | -1.97531 | 0.01746  |
| H  | -2.57635 | -2.15704 | -1.59678 |
| H  | -0.84427 | -2.53399 | -1.37560 |
| C  | 2.59741  | -0.06510 | 0.84656  |
| H  | 3.06103  | 0.36366  | -0.04128 |
| H  | 3.00155  | 0.40958  | 1.74303  |
| H  | 2.83792  | -1.13263 | 0.89439  |
| Au | 0.46773  | 2.25179  | -0.07581 |
| Cl | 0.56243  | 4.49334  | 0.12336  |
| Cl | -2.77786 | 0.89573  | -0.81465 |

**R = *t*-Bu**

|    |          |          |          |
|----|----------|----------|----------|
| P  | 0.71903  | -0.01283 | 0.70697  |
| C  | 0.34737  | 0.28087  | -0.94766 |
| P  | -1.10267 | -0.28886 | -1.79393 |
| O  | -0.72379 | -0.27683 | -3.26173 |
| Pb | 1.50581  | 0.49880  | -3.10050 |
| Cl | 2.51948  | -1.79933 | -3.01646 |
| Au | 0.14814  | 2.20227  | 0.00019  |
| Cl | -0.07023 | 4.38759  | 0.51903  |
| C  | 2.57039  | 0.10846  | 0.96315  |
| C  | 3.00762  | -1.35503 | 1.11037  |
| C  | 3.37650  | 0.78360  | -0.13116 |
| C  | 2.75098  | 0.84089  | 2.29404  |
| H  | 2.44085  | -1.87384 | 1.88888  |
| H  | 2.89787  | -1.90319 | 0.17116  |
| H  | 4.06377  | -1.38642 | 1.39673  |
| H  | 3.01642  | 1.79378  | -0.34381 |
| H  | 4.42162  | 0.86818  | 0.18483  |
| H  | 3.38021  | 0.18454  | -1.04576 |
| H  | 3.79837  | 0.77933  | 2.60504  |
| H  | 2.48265  | 1.89699  | 2.21283  |
| H  | 2.14218  | 0.39708  | 3.08693  |
| C  | -1.79147 | -1.91680 | -1.30015 |
| C  | -2.86753 | -2.27744 | -2.32711 |
| C  | -0.64906 | -2.93405 | -1.36955 |
| C  | -2.38257 | -1.86951 | 0.10532  |
| H  | -3.70170 | -1.57384 | -2.30701 |
| H  | -2.46135 | -2.30781 | -3.33895 |
| H  | -3.25723 | -3.26947 | -2.08211 |
| H  | 0.11767  | -2.74268 | -0.61696 |
| H  | -1.06479 | -3.92715 | -1.17740 |
| H  | -0.16611 | -2.94916 | -2.34758 |

|    |          |          |          |
|----|----------|----------|----------|
| H  | -2.73956 | -2.87058 | 0.36366  |
| H  | -1.64269 | -1.57865 | 0.85438  |
| H  | -3.22827 | -1.18361 | 0.16884  |
| Cl | -2.63770 | 1.02066  | -1.51926 |

**R = Ph**

|    |          |          |          |
|----|----------|----------|----------|
| P  | 0.73086  | 0.29284  | 0.83340  |
| C  | 0.20032  | 0.29381  | -0.79925 |
| P  | -1.39627 | -0.12593 | -1.39179 |
| O  | -1.35884 | 0.12832  | -2.88308 |
| Pb | 0.99600  | 0.42763  | -3.12616 |
| Cl | 1.49082  | -2.01610 | -3.43218 |
| Au | 0.40854  | 2.38842  | -0.29930 |
| Cl | 0.52931  | 4.63806  | -0.37258 |
| C  | -1.82419 | -1.81759 | -1.00008 |
| C  | -1.84406 | -2.75127 | -2.03163 |
| C  | -2.10295 | -2.20611 | 0.30958  |
| C  | -2.14814 | -4.07467 | -1.74914 |
| H  | -1.61630 | -2.44110 | -3.04342 |
| C  | -2.40210 | -3.52842 | 0.58216  |
| H  | -2.09395 | -1.47650 | 1.11205  |
| C  | -2.42510 | -4.46171 | -0.44769 |
| H  | -2.16300 | -4.80374 | -2.55049 |
| H  | -2.62136 | -3.83319 | 1.59864  |
| H  | -2.66087 | -5.49732 | -0.23050 |
| C  | 2.53744  | 0.14277  | 0.74019  |
| C  | 3.18694  | -0.61450 | -0.23601 |
| C  | 3.28559  | 0.73859  | 1.75799  |
| C  | 4.56656  | -0.74279 | -0.20963 |
| H  | 2.61327  | -1.13406 | -0.99691 |
| C  | 4.66543  | 0.62334  | 1.76868  |
| H  | 2.78459  | 1.30798  | 2.53477  |
| C  | 5.30666  | -0.11630 | 0.78407  |
| H  | 5.06336  | -1.34054 | -0.96529 |
| H  | 5.24177  | 1.10630  | 2.54920  |
| H  | 6.38607  | -0.21510 | 0.79877  |
| Cl | -2.87124 | 0.97364  | -0.53923 |

**R = Mes**

|    |          |          |          |
|----|----------|----------|----------|
| P  | 0.80797  | 0.34298  | 1.21908  |
| C  | 0.15880  | 0.24399  | -0.37120 |
| P  | -1.40336 | -0.12757 | -1.08958 |
| O  | -1.27926 | 0.42861  | -2.49377 |
| Pb | 1.07969  | 0.69376  | -2.61364 |
| Cl | 1.52006  | -1.65926 | -3.39769 |
| Au | 0.16439  | 2.37056  | 0.10949  |
| Cl | 0.02146  | 4.62394  | 0.01550  |
| C  | -1.84658 | -1.87106 | -1.02194 |
| C  | -2.14902 | -2.57851 | -2.21084 |
| C  | -1.91193 | -2.53038 | 0.22301  |
| C  | -2.43562 | -3.93354 | -2.10845 |
| C  | -2.20756 | -3.88673 | 0.25327  |
| C  | -2.45253 | -4.61409 | -0.89955 |
| H  | -2.66784 | -4.47484 | -3.02003 |
| H  | -2.25968 | -4.38251 | 1.21785  |
| C  | 2.61622  | 0.25522  | 0.96217  |
| C  | 3.17281  | -0.94518 | 0.47692  |
| C  | 3.45565  | 1.29241  | 1.40172  |
| C  | 4.55161  | -1.03056 | 0.33966  |
| C  | 4.82948  | 1.15667  | 1.23914  |
| C  | 5.39714  | 0.01634  | 0.68856  |
| H  | 4.97910  | -1.95715 | -0.03193 |
| H  | 5.47465  | 1.96596  | 1.56845  |
| Cl | -2.97584 | 0.85079  | -0.22040 |
| C  | 2.92696  | 2.53892  | 2.04633  |
| H  | 2.62552  | 3.28808  | 1.30796  |

|   |          |          |          |
|---|----------|----------|----------|
| H | 2.05237  | 2.33911  | 2.67198  |
| H | 3.69168  | 2.99238  | 2.67898  |
| C | 2.34097  | -2.15824 | 0.17483  |
| H | 1.59505  | -2.33926 | 0.95453  |
| H | 1.80957  | -2.07778 | -0.77560 |
| H | 2.97707  | -3.04242 | 0.11857  |
| C | 6.87702  | -0.09241 | 0.48934  |
| H | 7.22729  | -1.11324 | 0.65358  |
| H | 7.14954  | 0.18330  | -0.53429 |
| H | 7.42042  | 0.57160  | 1.16343  |
| C | -1.69270 | -1.86437 | 1.54838  |
| H | -0.64874 | -1.94527 | 1.86504  |
| H | -1.95481 | -0.80819 | 1.55806  |
| H | -2.29582 | -2.35903 | 2.31150  |
| C | -2.73053 | -6.08314 | -0.84742 |
| H | -3.46876 | -6.37513 | -1.59661 |
| H | -1.81794 | -6.65165 | -1.05198 |
| H | -3.09479 | -6.38675 | 0.13511  |
| C | -2.21447 | -1.98164 | -3.58666 |
| H | -2.82776 | -1.08242 | -3.62123 |
| H | -1.22146 | -1.70977 | -3.94718 |
| H | -2.63463 | -2.71625 | -4.27423 |

**R = Mes\***

|    |          |          |          |
|----|----------|----------|----------|
| P  | 0.65775  | 0.07201  | 1.16926  |
| C  | 0.38139  | 0.08183  | -0.54173 |
| P  | -1.03841 | -0.15397 | -1.62623 |
| O  | -0.39666 | -0.06326 | -2.99702 |
| Pb | 1.82453  | 0.62517  | -2.49737 |
| Cl | 2.94796  | -1.45571 | -3.38137 |
| Au | 0.40554  | 2.18946  | 0.01289  |
| Cl | 0.32671  | 4.45742  | -0.09189 |
| C  | 2.50843  | -0.02254 | 1.26483  |
| C  | 3.18948  | -1.15843 | 0.74510  |
| C  | 3.27766  | 1.09134  | 1.67877  |
| C  | 4.49266  | -0.99151 | 0.30095  |
| C  | 4.58662  | 1.18823  | 1.19870  |
| C  | 5.18891  | 0.20641  | 0.43222  |
| H  | 4.99524  | -1.84040 | -0.14334 |
| H  | 5.15449  | 2.07093  | 1.45655  |
| C  | 2.90620  | 2.12121  | 2.76709  |
| C  | 2.70869  | -2.61385 | 0.90749  |
| C  | 6.57664  | 0.36010  | -0.18003 |
| C  | 3.86137  | 1.82682  | 3.94224  |
| H  | 3.72452  | 0.80759  | 4.31271  |
| H  | 4.90784  | 1.94289  | 3.65752  |
| H  | 3.65466  | 2.51968  | 4.76252  |
| C  | 3.12773  | 3.56588  | 2.31072  |
| H  | 2.47954  | 3.83261  | 1.47527  |
| H  | 2.90044  | 4.24615  | 3.13609  |
| H  | 4.16141  | 3.75124  | 2.01434  |
| C  | 1.49821  | 2.00674  | 3.34292  |
| H  | 1.42452  | 2.65991  | 4.21663  |
| H  | 0.72234  | 2.33406  | 2.64793  |
| H  | 1.26870  | 0.99128  | 3.67491  |
| C  | 3.04708  | -3.49291 | -0.29881 |
| H  | 2.64359  | -3.08470 | -1.22423 |
| H  | 4.12307  | -3.61509 | -0.43209 |
| H  | 2.63148  | -4.49260 | -0.14609 |
| C  | 3.48118  | -3.14929 | 2.12927  |
| H  | 4.55957  | -3.09967 | 1.96905  |
| H  | 3.24673  | -2.57242 | 3.02761  |
| H  | 3.20874  | -4.19327 | 2.31082  |
| C  | 1.22856  | -2.79031 | 1.22489  |
| H  | 0.92295  | -2.22097 | 2.10985  |
| H  | 0.58431  | -2.52410 | 0.38865  |

|    |          |          |          |
|----|----------|----------|----------|
| H  | 1.03989  | -3.84238 | 1.45688  |
| C  | 7.20550  | 1.71277  | 0.14272  |
| H  | 6.59315  | 2.54243  | -0.21919 |
| H  | 7.36394  | 1.84407  | 1.21639  |
| H  | 8.18079  | 1.78604  | -0.34429 |
| C  | 6.45511  | 0.23291  | -1.70347 |
| H  | 7.44364  | 0.29466  | -2.16728 |
| H  | 5.99795  | -0.71319 | -1.99936 |
| H  | 5.84102  | 1.03903  | -2.11368 |
| C  | 7.50752  | -0.73830 | 0.34715  |
| H  | 7.59631  | -0.68806 | 1.43530  |
| H  | 7.15362  | -1.73641 | 0.08266  |
| H  | 8.50624  | -0.61863 | -0.08152 |
| C  | -2.34088 | -1.45472 | -1.66349 |
| C  | -2.31458 | -2.34407 | -2.78198 |
| C  | -3.57781 | -1.26465 | -0.98908 |
| C  | -3.52533 | -2.66038 | -3.37887 |
| C  | -1.09127 | -3.11513 | -3.31442 |
| C  | -4.74535 | -1.65180 | -1.63937 |
| C  | -3.78337 | -0.81812 | 0.47065  |
| C  | -4.75674 | -2.25673 | -2.88321 |
| H  | -3.50065 | -3.27162 | -4.27110 |
| C  | -0.61683 | -2.60595 | -4.67839 |
| C  | -1.49911 | -4.59293 | -3.49232 |
| C  | 0.04236  | -3.15217 | -2.29846 |
| H  | -5.68514 | -1.46239 | -1.14080 |
| C  | -2.50189 | -0.47352 | 1.20657  |
| C  | -4.37546 | -2.04068 | 1.20099  |
| C  | -4.76285 | 0.35176  | 0.60565  |
| C  | -6.03560 | -2.56168 | -3.65203 |
| H  | 0.20096  | -3.23456 | -5.03998 |
| H  | -1.42950 | -2.65690 | -5.40813 |
| H  | -0.26524 | -1.57975 | -4.62701 |
| H  | -2.18632 | -4.75045 | -4.32415 |
| H  | -0.60042 | -5.17693 | -3.70608 |
| H  | -1.95843 | -4.99502 | -2.58611 |
| H  | 0.46583  | -2.17691 | -2.07134 |
| H  | -0.29731 | -3.61693 | -1.36950 |
| H  | 0.86674  | -3.74755 | -2.69420 |
| H  | -1.76207 | -1.27081 | 1.11087  |
| H  | -2.06500 | 0.46648  | 0.87232  |
| H  | -2.71177 | -0.35502 | 2.27221  |
| H  | -4.51451 | -1.79729 | 2.25790  |
| H  | -5.34214 | -2.33912 | 0.79404  |
| H  | -3.70219 | -2.89888 | 1.13463  |
| H  | -5.74178 | 0.12376  | 0.18094  |
| H  | -4.91077 | 0.57872  | 1.66485  |
| H  | -4.38228 | 1.24931  | 0.11850  |
| C  | -7.27623 | -2.01499 | -2.95095 |
| C  | -6.19548 | -4.07896 | -3.80602 |
| C  | -5.94159 | -1.91700 | -5.04023 |
| H  | -7.43724 | -2.48612 | -1.97791 |
| H  | -7.21564 | -0.93361 | -2.80533 |
| H  | -8.15895 | -2.21857 | -3.56161 |
| H  | -5.35949 | -4.52274 | -4.35003 |
| H  | -6.25890 | -4.56722 | -2.83042 |
| H  | -7.11106 | -4.30458 | -4.35960 |
| H  | -5.83681 | -0.83233 | -4.96164 |
| H  | -5.08729 | -2.29517 | -5.60506 |
| H  | -6.84612 | -2.13205 | -5.61563 |
| Cl | -2.24009 | 1.51804  | -1.55655 |

**[R-P=C(Pb(II)Cl)-P(O)MeR](AuCl)****Coordination through Pb(II) atom****R = H**

|    |          |          |          |
|----|----------|----------|----------|
| P  | 0.85769  | 0.09359  | 0.83241  |
| C  | 0.44611  | -0.08511 | -0.75990 |
| P  | -1.17105 | -0.18391 | -1.46739 |
| O  | -0.92222 | 0.08841  | -2.94477 |
| Pb | 1.42477  | -0.06259 | -2.84848 |
| Cl | 1.47545  | -2.49625 | -3.08378 |
| C  | -2.37059 | 0.92030  | -0.72982 |
| H  | -3.32836 | 0.80688  | -1.24121 |
| H  | -2.49021 | 0.67826  | 0.32887  |
| H  | -2.02240 | 1.94876  | -0.83415 |
| Au | 2.77940  | 1.58768  | -4.31779 |
| Cl | 3.95172  | 3.08138  | -5.53379 |
| H  | 2.27751  | 0.17652  | 0.68858  |
| H  | -1.68596 | -1.47717 | -1.24145 |

**R = Me**

|    |          |          |          |
|----|----------|----------|----------|
| P  | 0.84761  | 0.02686  | 0.84262  |
| C  | 0.44498  | -0.10867 | -0.75169 |
| P  | -1.17602 | -0.23325 | -1.45286 |
| O  | -0.91479 | 0.04780  | -2.93504 |
| Pb | 1.40234  | -0.03306 | -2.83897 |
| Cl | 1.55310  | -2.47484 | -3.11098 |
| C  | -2.33396 | 0.94289  | -0.74881 |
| H  | -3.29901 | 0.84780  | -1.25070 |
| H  | -2.45724 | 0.75686  | 0.32005  |
| H  | -1.94929 | 1.95210  | -0.89910 |
| C  | -1.85159 | -1.87381 | -1.19469 |
| H  | -2.01560 | -2.05801 | -0.13134 |
| H  | -2.79542 | -1.96539 | -1.73653 |
| H  | -1.13769 | -2.59988 | -1.58798 |
| C  | 2.67699  | 0.14378  | 0.88712  |
| H  | 3.13062  | 0.24121  | -0.09944 |
| H  | 2.96327  | 0.99560  | 1.50945  |
| H  | 3.06605  | -0.75483 | 1.37546  |
| Au | 2.72067  | 1.60801  | -4.35130 |
| Cl | 3.87372  | 3.09986  | -5.59276 |

**R = *t*-Bu**

|    |          |          |          |
|----|----------|----------|----------|
| P  | 0.82827  | -0.23272 | 0.76305  |
| C  | 0.50188  | -0.16410 | -0.85383 |
| P  | -1.09120 | -0.35202 | -1.62202 |
| O  | -0.77236 | -0.10574 | -3.10226 |
| Pb | 1.49883  | 0.30607  | -2.87544 |
| Cl | 2.33772  | -1.94962 | -3.39389 |
| C  | -2.21840 | 0.90539  | -0.99703 |
| H  | -3.17452 | 0.84913  | -1.51939 |
| H  | -2.37210 | 0.79040  | 0.07662  |
| H  | -1.76910 | 1.88067  | -1.18991 |
| Au | 2.38498  | 2.39208  | -4.13846 |
| Cl | 3.13874  | 4.27030  | -5.14437 |
| C  | 2.65524  | 0.05975  | 1.05205  |
| C  | 3.16486  | -1.22836 | 1.70688  |
| C  | 3.47610  | 0.38347  | -0.18036 |
| C  | 2.72503  | 1.21044  | 2.06017  |
| H  | 2.57258  | -1.49942 | 2.58528  |
| H  | 3.14644  | -2.06888 | 1.00901  |
| H  | 4.19926  | -1.08526 | 2.03558  |
| H  | 3.14175  | 1.30821  | -0.66089 |
| H  | 4.52268  | 0.53959  | 0.10104  |
| H  | 3.46451  | -0.43857 | -0.90260 |
| H  | 3.76067  | 1.34930  | 2.38610  |
| H  | 2.38186  | 2.15189  | 1.62382  |

|   |          |          |          |
|---|----------|----------|----------|
| H | 2.12084  | 1.00788  | 2.94877  |
| C | -1.86428 | -1.99951 | -1.38114 |
| C | -3.08667 | -2.06587 | -2.30120 |
| C | -0.85357 | -3.06900 | -1.79422 |
| C | -2.27732 | -2.19307 | 0.07559  |
| H | -3.86348 | -1.35454 | -2.01132 |
| H | -2.81410 | -1.87921 | -3.34133 |
| H | -3.52021 | -3.06794 | -2.23713 |
| H | 0.03040  | -3.06385 | -1.15450 |
| H | -1.32800 | -4.05091 | -1.71012 |
| H | -0.52184 | -2.93853 | -2.82521 |
| H | -2.67900 | -3.20304 | 0.19732  |
| H | -1.43142 | -2.09062 | 0.76014  |
| H | -3.05671 | -1.49175 | 0.38156  |

**R = Ph**

|    |          |          |          |
|----|----------|----------|----------|
| P  | 0.88868  | 0.16471  | 0.80502  |
| C  | 0.45203  | -0.18061 | -0.75211 |
| P  | -1.16127 | -0.33110 | -1.45832 |
| O  | -0.88314 | -0.17885 | -2.95337 |
| Pb | 1.45867  | -0.15247 | -2.80339 |
| Cl | 1.76047  | -2.58134 | -3.09124 |
| C  | -2.28570 | 0.93145  | -0.85307 |
| H  | -3.24377 | 0.83143  | -1.36616 |
| H  | -2.43643 | 0.82649  | 0.22288  |
| H  | -1.85707 | 1.91215  | -1.06374 |
| Au | 2.69528  | 1.52027  | -4.35170 |
| Cl | 3.77110  | 3.02849  | -5.64489 |
| C  | 2.69889  | 0.19951  | 0.77362  |
| C  | 3.33719  | 1.11394  | 1.61357  |
| C  | 3.47171  | -0.65473 | -0.01864 |
| C  | 4.71934  | 1.21508  | 1.61690  |
| H  | 2.74625  | 1.76073  | 2.25469  |
| C  | 4.85347  | -0.56059 | -0.00099 |
| H  | 2.99441  | -1.42617 | -0.61601 |
| C  | 5.47714  | 0.38151  | 0.80703  |
| H  | 5.20630  | 1.94346  | 2.25482  |
| H  | 5.44564  | -1.23029 | -0.61383 |
| H  | 6.55836  | 0.45631  | 0.81428  |
| C  | -1.90006 | -1.92481 | -1.08970 |
| C  | -2.05704 | -2.84168 | -2.12456 |
| C  | -2.30181 | -2.25485 | 0.20390  |
| C  | -2.62446 | -4.08044 | -1.86519 |
| H  | -1.72866 | -2.58045 | -3.12328 |
| C  | -2.86677 | -3.49266 | 0.45597  |
| H  | -2.16383 | -1.55409 | 1.02124  |
| C  | -3.02953 | -4.40441 | -0.57974 |
| H  | -2.74437 | -4.79518 | -2.67077 |
| H  | -3.17761 | -3.74990 | 1.46177  |
| H  | -3.47026 | -5.37435 | -0.37958 |

**R = Mes**

|    |          |          |          |
|----|----------|----------|----------|
| P  | 1.03958  | -0.19707 | 1.30240  |
| C  | 0.43492  | -0.31605 | -0.23267 |
| P  | -1.15241 | -0.33163 | -1.03856 |
| O  | -0.75640 | 0.14855  | -2.43555 |
| Pb | 1.57926  | 0.13591  | -2.13740 |
| Cl | 1.94637  | -2.17977 | -2.91675 |
| Au | 2.94056  | 2.08047  | -3.18201 |
| Cl | 4.14236  | 3.82808  | -3.97112 |
| C  | 2.82088  | 0.04863  | 0.95857  |
| C  | 3.34295  | 1.35276  | 0.93850  |
| C  | 3.65639  | -1.05824 | 0.74642  |
| C  | 4.69022  | 1.52785  | 0.65592  |
| C  | 5.00032  | -0.83062 | 0.46958  |
| C  | 5.53373  | 0.45016  | 0.40703  |

|                 |          |          |          |   |          |          |          |
|-----------------|----------|----------|----------|---|----------|----------|----------|
| H               | 5.09145  | 2.53635  | 0.62305  | C | -2.40181 | 1.06242  | 2.99767  |
| H               | 5.64929  | -1.68461 | 0.30047  | C | -5.66252 | 1.17029  | -0.82924 |
| C               | -1.95090 | -1.95549 | -1.02678 | C | 4.33728  | 1.36376  | 2.47964  |
| C               | -2.19949 | -2.65583 | -2.22994 | C | 3.48411  | 0.50294  | -2.52912 |
| C               | -2.33140 | -2.52830 | 0.20386  | C | 7.66481  | -1.13551 | -0.33415 |
| C               | -2.79945 | -3.90765 | -2.14903 | C | -3.72843 | 0.97985  | 3.77017  |
| C               | -2.91629 | -3.78696 | 0.21761  | H | -3.51209 | 0.83497  | 4.83126  |
| C               | -3.15532 | -4.49945 | -0.94674 | H | -4.31506 | 1.89508  | 3.66373  |
| H               | -2.99059 | -4.44146 | -3.07458 | H | -4.34462 | 0.13606  | 3.45671  |
| H               | -3.19558 | -4.21888 | 1.17393  | C | -1.54901 | 2.09076  | 3.74314  |
| C               | 2.47151  | 2.54875  | 1.18649  | H | -0.51844 | 2.14670  | 3.37441  |
| H               | 1.78109  | 2.38428  | 2.01983  | H | -1.98129 | 3.09205  | 3.68055  |
| H               | 3.07490  | 3.42732  | 1.41667  | H | -1.47876 | 1.81185  | 4.79787  |
| H               | 1.86480  | 2.79186  | 0.30818  | C | -1.73464 | -0.31216 | 3.09627  |
| C               | 3.13279  | -2.46256 | 0.80512  | H | -2.31467 | -1.07627 | 2.57219  |
| H               | 2.44759  | -2.60378 | 1.64679  | H | -0.72569 | -0.29587 | 2.68343  |
| H               | 2.58571  | -2.72183 | -0.10622 | H | -1.66148 | -0.61490 | 4.14492  |
| H               | 3.95152  | -3.17465 | 0.91551  | C | -6.80945 | 1.43036  | 0.15445  |
| C               | 6.97477  | 0.67437  | 0.06865  | H | -7.75293 | 1.07669  | -0.26999 |
| H               | 7.07305  | 1.06950  | -0.94673 | H | -6.65964 | 0.91108  | 1.10307  |
| H               | 7.43190  | 1.40183  | 0.74309  | H | -6.91055 | 2.49797  | 0.36603  |
| H               | 7.54677  | -0.25263 | 0.12361  | C | -5.99585 | 1.86238  | -2.14824 |
| C               | -2.18421 | -1.84302 | 1.53205  | H | -6.92869 | 1.45508  | -2.54503 |
| H               | -1.30666 | -1.20079 | 1.60343  | H | -6.13549 | 2.93940  | -2.02208 |
| H               | -3.06460 | -1.23172 | 1.75363  | H | -5.21845 | 1.69866  | -2.89847 |
| H               | -2.10242 | -2.58372 | 2.32847  | C | -5.54801 | -0.33620 | -1.09271 |
| C               | -1.86924 | -2.15857 | -3.60819 | H | -4.74686 | -0.54809 | -1.80505 |
| H               | -2.26101 | -1.16057 | -3.79840 | H | -5.34131 | -0.89801 | -0.17946 |
| H               | -0.79029 | -2.10886 | -3.76361 | H | -6.48341 | -0.71701 | -1.51164 |
| H               | -2.28656 | -2.84413 | -4.34630 | C | -2.48671 | 4.90914  | -2.05617 |
| C               | -3.75544 | -5.86975 | -0.90885 | H | -3.44532 | 5.23959  | -1.64950 |
| H               | -2.96976 | -6.63168 | -0.90112 | H | -1.96365 | 5.79301  | -2.42812 |
| H               | -4.36306 | -6.01565 | -0.01435 | H | -2.67511 | 4.25768  | -2.91256 |
| H               | -4.37896 | -6.05516 | -1.78521 | C | -1.31967 | 5.28861  | 0.07758  |
| C               | -2.27880 | 0.87997  | -0.32630 | H | -2.24290 | 5.61686  | 0.56141  |
| H               | -3.19540 | 0.88677  | -0.91965 | H | -0.64616 | 4.91761  | 0.85322  |
| H               | -2.51801 | 0.66952  | 0.71403  | H | -0.84458 | 6.16157  | -0.37869 |
| H               | -1.79861 | 1.85710  | -0.40014 | C | -0.31017 | 3.83379  | -1.69857 |
| <b>R = Mes*</b> |          |          |          | H | 0.46700  | 3.52238  | -0.99616 |
| P               | -0.00912 | 2.38376  | 1.11188  | H | -0.47095 | 3.01307  | -2.39920 |
| C               | 0.43179  | 0.88380  | 0.56155  | H | 0.08694  | 4.69322  | -2.24673 |
| P               | 1.91384  | -0.10845 | 0.42728  | C | 2.98316  | 2.05385  | 2.56851  |
| Cl              | -1.17175 | 0.26838  | -2.76657 | H | 2.77842  | 2.63941  | 1.67013  |
| O               | 1.48045  | -1.08783 | -0.67288 | H | 2.14721  | 1.37658  | 2.73224  |
| C               | 2.01653  | -1.12690 | 1.92109  | H | 2.98581  | 2.74716  | 3.41316  |
| H               | 2.83921  | -1.83047 | 1.78188  | C | 5.36946  | 2.51005  | 2.43786  |
| H               | 2.15182  | -0.58074 | 2.84883  | H | 5.23411  | 3.15185  | 3.31277  |
| H               | 1.08432  | -1.69385 | 1.97194  | H | 6.39654  | 2.14499  | 2.44525  |
| C               | 3.63999  | 0.42184  | 0.10830  | H | 5.23493  | 3.12157  | 1.54271  |
| C               | 4.16508  | 0.15850  | -1.19053 | C | 4.59281  | 0.54502  | 3.74885  |
| C               | 4.55650  | 0.55297  | 1.18523  | H | 5.60471  | 0.13672  | 3.76979  |
| C               | 5.45904  | -0.33574 | -1.27427 | H | 4.47920  | 1.18468  | 4.62818  |
| C               | 5.84668  | 0.05866  | 1.01458  | H | 3.90093  | -0.29151 | 3.85285  |
| C               | 6.29544  | -0.48636 | -0.17669 | C | 2.30631  | 1.45626  | -2.35868 |
| H               | 5.83307  | -0.60776 | -2.25264 | H | 1.95887  | 1.78079  | -3.34209 |
| H               | 6.52744  | 0.11618  | 1.85252  | H | 1.44704  | 1.00192  | -1.87541 |
| C               | -1.82159 | 2.34728  | 0.78136  | H | 2.60293  | 2.34630  | -1.79729 |
| C               | -2.33193 | 3.03875  | -0.34038 | C | 3.06838  | -0.74646 | -3.31041 |
| C               | -2.67399 | 1.50344  | 1.53998  | H | 2.31949  | -1.32025 | -2.76961 |
| C               | -3.58132 | 2.65715  | -0.82424 | H | 2.65255  | -0.45306 | -4.27809 |
| C               | -3.89746 | 1.15443  | 0.97733  | H | 3.93090  | -1.39125 | -3.49901 |
| C               | -4.34842 | 1.66508  | -0.23387 | C | 4.50700  | 1.28010  | -3.38284 |
| H               | -3.95945 | 3.13964  | -1.71093 | H | 4.89747  | 2.14826  | -2.84600 |
| H               | -4.53834 | 0.47022  | 1.51631  | H | 5.35142  | 0.66906  | -3.70292 |
| C               | -1.61172 | 4.23259  | -0.99770 | H | 4.00726  | 1.63698  | -4.28675 |
|                 |          |          |          | C | 8.41971  | -1.22238 | 0.98960  |

|    |          |          |          |
|----|----------|----------|----------|
| H  | 8.64618  | -0.23382 | 1.39735  |
| H  | 7.85882  | -1.78548 | 1.73987  |
| H  | 9.37122  | -1.73584 | 0.83324  |
| C  | 8.51130  | -0.32241 | -1.32088 |
| H  | 8.04741  | -0.27059 | -2.30769 |
| H  | 8.65570  | 0.70006  | -0.96330 |
| H  | 9.49549  | -0.78388 | -1.43918 |
| C  | 7.47791  | -2.55722 | -0.87743 |
| H  | 6.89006  | -3.16658 | -0.18673 |
| H  | 6.96619  | -2.55781 | -1.84173 |
| H  | 8.45028  | -3.03837 | -1.01320 |
| Au | -2.27276 | -2.77386 | 0.05353  |
| Cl | -3.53420 | -4.55227 | 0.67126  |
| Pb | -0.83261 | -0.68773 | -0.51729 |

### Coordination through O atom

#### R= H

|    |          |          |          |
|----|----------|----------|----------|
| P  | 0.85986  | 0.08493  | 0.98463  |
| C  | 0.59543  | -0.10644 | -0.63856 |
| P  | -0.95630 | 0.02527  | -1.42480 |
| O  | -0.55893 | 0.35200  | -2.88578 |
| Pb | 1.83898  | -0.35663 | -2.66779 |
| Cl | 1.21591  | -2.75110 | -2.80215 |
| C  | -2.10282 | 1.21877  | -0.74733 |
| H  | -3.03192 | 1.20537  | -1.32023 |
| H  | -2.30605 | 0.96183  | 0.29555  |
| H  | -1.65697 | 2.21308  | -0.79786 |
| Au | -1.99295 | 0.72093  | -4.36866 |
| Cl | -3.51824 | 1.14257  | -5.92985 |
| H  | 2.28374  | -0.07360 | 1.00445  |
| H  | -1.62301 | -1.21290 | -1.37057 |

#### R = Me

|    |          |          |          |
|----|----------|----------|----------|
| P  | 0.82152  | -0.01704 | 0.97640  |
| C  | 0.58239  | -0.13242 | -0.65372 |
| P  | -0.99077 | -0.02081 | -1.40749 |
| O  | -0.60494 | 0.29779  | -2.88443 |
| Pb | 1.79005  | -0.23646 | -2.71627 |
| Cl | 1.42762  | -2.69442 | -2.92014 |
| C  | -2.05581 | 1.26316  | -0.75037 |
| H  | -2.99817 | 1.28212  | -1.30156 |
| H  | -2.24787 | 1.06821  | 0.30724  |
| H  | -1.55712 | 2.22738  | -0.85419 |
| C  | -1.87864 | -1.57239 | -1.31909 |
| H  | -2.14260 | -1.78941 | -0.28215 |
| H  | -2.78226 | -1.51036 | -1.92967 |
| H  | -1.22715 | -2.35876 | -1.70545 |
| C  | 2.63251  | -0.20315 | 1.22503  |
| H  | 3.19907  | -0.19442 | 0.29346  |
| H  | 2.98879  | 0.59431  | 1.88243  |
| H  | 2.81281  | -1.14968 | 1.74386  |
| Au | -2.03975 | 0.66021  | -4.36165 |
| Cl | -3.57209 | 1.07126  | -5.92104 |

#### R = t-Bu

|    |          |          |          |
|----|----------|----------|----------|
| P  | 0.89950  | -0.50119 | 0.86098  |
| C  | 0.49915  | -0.10952 | -0.69428 |
| P  | -1.15859 | -0.06787 | -1.27044 |
| O  | -0.98418 | 0.53563  | -2.69969 |
| Pb | 1.47550  | 0.79210  | -2.69236 |
| Cl | 2.09225  | -1.43093 | -3.65112 |
| C  | -2.17780 | 1.02673  | -0.27113 |
| H  | -3.18823 | 1.09653  | -0.67607 |
| H  | -2.20584 | 0.66770  | 0.75906  |

|    |          |          |          |
|----|----------|----------|----------|
| H  | -1.72285 | 2.01817  | -0.28936 |
| Au | -2.38235 | 1.65966  | -3.77094 |
| Cl | -3.84124 | 2.88800  | -4.91745 |
| C  | 2.76104  | -0.39342 | 1.05627  |
| C  | 3.21714  | -1.82499 | 1.35563  |
| C  | 3.51024  | 0.15373  | -0.14289 |
| C  | 2.99861  | 0.48786  | 2.28480  |
| H  | 2.66947  | -2.25591 | 2.19840  |
| H  | 3.08159  | -2.47836 | 0.49042  |
| H  | 4.28056  | -1.82537 | 1.61684  |
| H  | 3.19772  | 1.17756  | -0.37585 |
| H  | 4.58413  | 0.19321  | 0.06876  |
| H  | 3.38360  | -0.48795 | -1.02059 |
| H  | 4.06252  | 0.48544  | 2.54289  |
| H  | 2.69905  | 1.52362  | 2.10386  |
| H  | 2.44451  | 0.12455  | 3.15455  |
| C  | -1.97808 | -1.70842 | -1.37911 |
| C  | -3.30639 | -1.54918 | -2.12262 |
| C  | -1.06235 | -2.65356 | -2.15661 |
| C  | -2.22398 | -2.24832 | 0.02891  |
| H  | -4.00560 | -0.89529 | -1.59720 |
| H  | -3.16588 | -1.16028 | -3.13246 |
| H  | -3.77634 | -2.53358 | -2.20402 |
| H  | -0.10820 | -2.80869 | -1.65104 |
| H  | -1.56134 | -3.62223 | -2.25047 |
| H  | -0.85118 | -2.28326 | -3.16072 |
| H  | -2.64408 | -3.25464 | -0.05276 |
| H  | -1.30199 | -2.32145 | 0.61099  |
| H  | -2.93871 | -1.63907 | 0.58652  |

#### R = Ph

|    |          |          |          |
|----|----------|----------|----------|
| P  | 0.78595  | 0.22950  | 0.92748  |
| C  | 0.53483  | -0.23609 | -0.63963 |
| P  | -0.96754 | -0.17812 | -1.52032 |
| O  | -0.46664 | -0.10762 | -2.98932 |
| Pb | 1.97399  | -0.48629 | -2.51000 |
| Cl | 1.81416  | -2.97418 | -2.63851 |
| C  | -1.99637 | 1.24151  | -1.13522 |
| H  | -2.89535 | 1.22251  | -1.75370 |
| H  | -2.27300 | 1.22612  | -0.07910 |
| H  | -1.42799 | 2.14934  | -1.34243 |
| Au | -1.66563 | 0.36093  | -4.63665 |
| Cl | -2.91849 | 0.87902  | -6.40135 |
| C  | 2.56580  | -0.05181 | 1.16858  |
| C  | 3.25955  | -1.10760 | 0.56826  |
| C  | 3.25529  | 0.81838  | 2.01406  |
| C  | 4.62153  | -1.25844 | 0.77787  |
| H  | 2.72080  | -1.84410 | -0.02203 |
| C  | 4.61994  | 0.67288  | 2.21121  |
| H  | 2.72044  | 1.62292  | 2.50961  |
| C  | 5.30444  | -0.36228 | 1.59031  |
| H  | 5.14768  | -2.08708 | 0.31759  |
| H  | 5.14980  | 1.36532  | 2.85527  |
| H  | 6.36941  | -0.48194 | 1.75294  |
| C  | -1.95230 | -1.65348 | -1.26197 |
| C  | -2.65030 | -1.83055 | -0.06762 |
| C  | -1.99695 | -2.63423 | -2.24824 |
| C  | -3.39764 | -2.97783 | 0.13100  |
| H  | -2.60647 | -1.08042 | 0.71523  |
| C  | -2.74885 | -3.78085 | -2.04246 |
| H  | -1.44429 | -2.50184 | -3.16995 |
| C  | -3.44834 | -3.95177 | -0.85822 |
| H  | -3.94112 | -3.11398 | 1.05857  |
| H  | -2.78482 | -4.54201 | -2.81259 |
| H  | -4.03525 | -4.84952 | -0.70141 |

**R = Mes**

|    |          |          |          |
|----|----------|----------|----------|
| P  | 0.73022  | -0.16074 | 1.35667  |
| C  | 0.38840  | -0.34502 | -0.24874 |
| P  | -1.05194 | -0.22488 | -1.23499 |
| O  | -0.41584 | 0.11953  | -2.61103 |
| Pb | 2.03072  | -0.15755 | -1.92783 |
| Cl | 2.16365  | -2.61016 | -2.41760 |
| Au | -1.17489 | 1.38707  | -4.08756 |
| Cl | -1.93250 | 2.75800  | -5.66954 |
| C  | 2.56828  | -0.20114 | 1.33176  |
| C  | 3.25024  | -1.42949 | 1.35996  |
| C  | 3.28470  | 1.00691  | 1.34681  |
| C  | 4.64022  | -1.42017 | 1.35787  |
| C  | 4.67408  | 0.96474  | 1.34328  |
| C  | 5.37071  | -0.23777 | 1.34047  |
| H  | 5.16731  | -2.36948 | 1.38020  |
| H  | 5.22697  | 1.89957  | 1.35402  |
| C  | -2.02221 | -1.75238 | -1.27841 |
| C  | -2.69911 | -2.14450 | -0.10419 |
| C  | -2.10520 | -2.56273 | -2.43501 |
| C  | -3.43567 | -3.32103 | -0.10340 |
| C  | -2.86717 | -3.72386 | -2.36974 |
| C  | -3.53999 | -4.12556 | -1.22628 |
| H  | -3.94094 | -3.61477 | 0.81162  |
| H  | -2.92509 | -4.34374 | -3.25869 |
| C  | 2.57956  | 2.33221  | 1.36483  |
| H  | 2.10069  | 2.55278  | 0.40554  |
| H  | 1.79060  | 2.35831  | 2.12283  |
| H  | 3.27843  | 3.14163  | 1.57864  |
| C  | 2.51290  | -2.73446 | 1.39496  |
| H  | 1.68084  | -2.70723 | 2.10514  |
| H  | 2.09541  | -2.97892 | 0.41380  |
| H  | 3.17979  | -3.54668 | 1.68668  |
| C  | 6.86804  | -0.26191 | 1.31068  |
| H  | 7.23293  | -0.39845 | 0.28794  |
| H  | 7.28976  | 0.67080  | 1.68835  |
| H  | 7.26409  | -1.08541 | 1.90789  |
| C  | -2.70417 | -1.35481 | 1.17375  |
| H  | -1.76144 | -0.84756 | 1.38154  |
| H  | -3.49791 | -0.60196 | 1.16619  |
| H  | -2.90149 | -2.01713 | 2.01741  |
| C  | -1.43114 | -2.28230 | -3.74613 |
| H  | -1.75220 | -1.33430 | -4.18159 |
| H  | -0.34631 | -2.24585 | -3.64391 |
| H  | -1.67549 | -3.07522 | -4.45298 |
| C  | -4.36280 | -5.37529 | -1.21470 |
| H  | -4.51101 | -5.74661 | -0.19962 |
| H  | -5.35106 | -5.18836 | -1.64617 |
| H  | -3.89468 | -6.16386 | -1.80681 |
| C  | -2.11589 | 1.15713  | -0.78244 |
| H  | -2.98843 | 1.17555  | -1.43802 |
| H  | -2.43121 | 1.10155  | 0.25739  |
| H  | -1.53963 | 2.07127  | -0.93702 |

**R = Mes\***

|   |          |          |          |
|---|----------|----------|----------|
| P | 1.71145  | 2.29999  | -0.39784 |
| C | 0.79787  | 0.92201  | -0.35122 |
| P | -0.91606 | 0.56987  | -0.48255 |
| C | 3.40643  | 1.55273  | -0.33699 |
| C | 4.14538  | 1.60142  | 0.87372  |
| C | 3.88086  | 0.76410  | -1.40794 |
| C | 5.16053  | 0.67292  | 1.05191  |
| C | 4.87850  | -0.17979 | -1.13576 |
| C | 5.49760  | -0.28213 | 0.09733  |
| H | 5.70169  | 0.67002  | 1.98653  |
| H | 5.19920  | -0.83195 | -1.93647 |

|   |          |          |          |
|---|----------|----------|----------|
| C | 3.51492  | 0.94860  | -2.89916 |
| C | 3.90689  | 2.66530  | 1.96150  |
| C | 6.55868  | -1.33209 | 0.41058  |
| C | 2.56771  | 2.47657  | 2.68010  |
| H | 1.71282  | 2.67775  | 2.03046  |
| H | 2.46116  | 1.45861  | 3.05859  |
| H | 2.50162  | 3.17549  | 3.51914  |
| C | 3.96732  | 4.06024  | 1.32429  |
| H | 4.93375  | 4.22591  | 0.84149  |
| H | 3.18532  | 4.21157  | 0.57741  |
| H | 3.83602  | 4.82511  | 2.09470  |
| C | 4.99242  | 2.62541  | 3.04012  |
| H | 4.95912  | 1.70314  | 3.62469  |
| H | 5.99505  | 2.74014  | 2.62094  |
| H | 4.82691  | 3.45388  | 3.73240  |
| C | 2.73148  | -0.24575 | -3.44850 |
| H | 1.73767  | -0.30282 | -2.99805 |
| H | 2.59621  | -0.14587 | -4.52922 |
| H | 3.25033  | -1.18953 | -3.26473 |
| C | 2.73875  | 2.22883  | -3.20461 |
| H | 1.70340  | 2.19320  | -2.86224 |
| H | 3.21848  | 3.10809  | -2.76727 |
| H | 2.70469  | 2.37569  | -4.28771 |
| C | 4.83080  | 1.07177  | -3.69127 |
| H | 5.44372  | 1.88919  | -3.30446 |
| H | 5.42893  | 0.16110  | -3.66438 |
| H | 4.60438  | 1.28236  | -4.73960 |
| C | 6.75547  | -2.31658 | -0.73908 |
| H | 7.12312  | -1.82419 | -1.64323 |
| H | 7.49596  | -3.06697 | -0.45273 |
| H | 5.83020  | -2.84466 | -0.98434 |
| C | 6.13663  | -2.12307 | 1.65438  |
| H | 6.02382  | -1.47782 | 2.52727  |
| H | 5.18112  | -2.62856 | 1.49826  |
| H | 6.89127  | -2.87837 | 1.89059  |
| C | 7.89757  | -0.63581 | 0.68315  |
| H | 7.83061  | 0.05160  | 1.52876  |
| H | 8.66621  | -1.37774 | 0.91664  |
| H | 8.22807  | -0.06561 | -0.18874 |
| C | -2.37677 | 1.43020  | 0.20634  |
| C | -2.95029 | 0.88412  | 1.39032  |
| C | -3.21320 | 2.19173  | -0.65087 |
| C | -4.33108 | 0.76683  | 1.44091  |
| C | -4.58984 | 2.03440  | -0.52845 |
| C | -5.17425 | 1.23461  | 0.44157  |
| H | -4.76695 | 0.28061  | 2.30439  |
| H | -5.22714 | 2.56816  | -1.22027 |
| C | -2.18835 | 0.55736  | 2.68841  |
| C | -2.24444 | -0.92551 | 3.06086  |
| C | -2.87576 | 1.36213  | 3.81077  |
| H | -1.68514 | -1.53643 | 2.35409  |
| H | -1.80663 | -1.07007 | 4.05222  |
| H | -3.27233 | -1.29373 | 3.08975  |
| H | -2.90052 | 2.42887  | 3.57440  |
| H | -3.89759 | 1.03378  | 4.00264  |
| H | -2.30915 | 1.23160  | 4.73628  |
| C | -2.74926 | 3.32936  | -1.58321 |
| C | -3.43292 | 4.60892  | -1.05754 |
| C | -3.18309 | 3.13067  | -3.03837 |
| H | -3.17308 | 4.78750  | -0.01167 |
| H | -3.09492 | 5.46726  | -1.64481 |
| H | -4.51932 | 4.55945  | -1.13126 |
| H | -2.72083 | 2.25663  | -3.49707 |
| H | -4.26488 | 3.01068  | -3.12049 |
| H | -2.90313 | 4.00688  | -3.62953 |
| C | -6.66698 | 0.93973  | 0.49275  |

|    |          |          |          |
|----|----------|----------|----------|
| C  | -7.27346 | 1.56800  | 1.75320  |
| C  | -6.86600 | -0.58063 | 0.53340  |
| H  | -7.14510 | 2.65353  | 1.75337  |
| H  | -8.34420 | 1.35142  | 1.80034  |
| H  | -6.81471 | 1.17445  | 2.66242  |
| H  | -6.42710 | -1.06604 | -0.34094 |
| H  | -6.40543 | -1.02672 | 1.41669  |
| H  | -7.93370 | -0.81526 | 0.55877  |
| Cl | 2.10615  | -1.32336 | 2.31658  |
| O  | -0.94864 | -0.88372 | 0.10137  |
| Au | -2.49941 | -2.21219 | -0.36766 |
| Cl | -4.12927 | -3.64637 | -0.88708 |
| C  | -1.25494 | 3.62207  | -1.51089 |
| H  | -0.92946 | 3.77314  | -0.47951 |
| H  | -0.62573 | 2.85072  | -1.95005 |
| H  | -1.04005 | 4.54190  | -2.06041 |
| C  | -0.74303 | 1.03635  | 2.67059  |
| H  | -0.10122 | 0.45201  | 2.01602  |
| H  | -0.67934 | 2.08995  | 2.38635  |
| H  | -0.31704 | 0.93268  | 3.67117  |
| C  | -7.40473 | 1.49059  | -0.72471 |
| H  | -7.36076 | 2.58202  | -0.77365 |
| H  | -7.00391 | 1.08447  | -1.65677 |
| H  | -8.45890 | 1.20983  | -0.66801 |
| Pb | 1.54587  | -1.33492 | -0.12610 |
| C  | -1.25513 | 0.33087  | -2.24759 |
| H  | -2.30621 | 0.07068  | -2.37970 |
| H  | -0.99511 | 1.18265  | -2.86914 |
| H  | -0.65167 | -0.52688 | -2.55225 |

#### Coordination through P(sp<sup>2</sup>) atom

##### R = H

|    |          |          |          |
|----|----------|----------|----------|
| P  | 0.76399  | 0.09517  | 0.85531  |
| C  | 0.47319  | -0.19967 | -0.72261 |
| P  | -1.06986 | -0.19935 | -1.56142 |
| O  | -0.69607 | -0.06128 | -3.03118 |
| Pb | 1.61655  | -0.53787 | -2.85142 |
| Cl | 1.24869  | -2.99296 | -2.70670 |
| C  | -2.24150 | 1.04339  | -1.02687 |
| H  | -3.14550 | 0.96394  | -1.63396 |
| H  | -2.49238 | 0.89062  | 0.02571  |
| H  | -1.80313 | 2.03374  | -1.15697 |
| Au | -0.55091 | 0.57656  | 2.56026  |
| Cl | -1.93823 | 1.08835  | 4.26914  |
| H  | 2.16257  | 0.01745  | 1.03793  |
| H  | -1.69829 | -1.43073 | -1.28545 |

##### R = Me

|    |          |          |          |
|----|----------|----------|----------|
| P  | 0.81955  | 0.11719  | 0.81681  |
| C  | 0.47446  | -0.15413 | -0.75173 |
| P  | -1.12108 | -0.25044 | -1.49222 |
| O  | -0.81850 | -0.23797 | -2.99267 |
| Pb | 1.49943  | -0.51829 | -2.92136 |
| Cl | 1.40107  | -3.00131 | -2.62107 |
| C  | -2.20126 | 1.11105  | -1.04429 |
| H  | -3.13985 | 1.01751  | -1.59473 |
| H  | -2.40333 | 1.10074  | 0.02902  |
| H  | -1.72121 | 2.05260  | -1.31321 |
| C  | -1.93413 | -1.76738 | -0.99133 |
| H  | -2.14219 | -1.75191 | 0.08039  |
| H  | -2.86750 | -1.87541 | -1.54813 |
| H  | -1.27134 | -2.60154 | -1.22918 |
| C  | 2.60176  | 0.09902  | 1.13825  |
| H  | 3.16354  | -0.08661 | 0.22357  |

|    |          |          |         |
|----|----------|----------|---------|
| H  | 2.89730  | 1.05422  | 1.57815 |
| H  | 2.81713  | -0.68358 | 1.86975 |
| Au | -0.55985 | 0.48205  | 2.51030 |
| Cl | -2.01493 | 0.85764  | 4.20550 |

##### R = t-Bu

|    |          |          |          |
|----|----------|----------|----------|
| P  | 0.76293  | 0.08924  | 0.91570  |
| C  | 0.45849  | -0.15373 | -0.66906 |
| P  | -1.10288 | -0.29345 | -1.48277 |
| O  | -0.74198 | -0.12700 | -2.96429 |
| Pb | 1.58299  | 0.10481  | -2.81009 |
| Cl | 2.29063  | -2.28738 | -3.04513 |
| C  | -2.22056 | 1.02046  | -0.96604 |
| H  | -3.14729 | 0.97010  | -1.53940 |
| H  | -2.43838 | 0.95481  | 0.10128  |
| H  | -1.73217 | 1.97457  | -1.16937 |
| Au | -0.67199 | 0.32837  | 2.59753  |
| Cl | -2.16827 | 0.61143  | 4.28053  |
| C  | 2.56444  | 0.18956  | 1.34490  |
| C  | 2.84992  | -1.00926 | 2.25569  |
| C  | 3.45828  | 0.14434  | 0.11727  |
| C  | 2.77526  | 1.49048  | 2.12159  |
| H  | 2.19198  | -1.01960 | 3.12818  |
| H  | 2.73361  | -1.95629 | 1.72383  |
| H  | 3.88156  | -0.94579 | 2.61510  |
| H  | 3.29873  | 1.01543  | -0.52550 |
| H  | 4.50565  | 0.16913  | 0.43323  |
| H  | 3.31140  | -0.77009 | -0.46293 |
| H  | 3.81066  | 1.53483  | 2.47235  |
| H  | 2.59063  | 2.36937  | 1.49896  |
| H  | 2.12219  | 1.54971  | 2.99563  |
| C  | -1.93814 | -1.90771 | -1.20648 |
| C  | -3.13687 | -1.95450 | -2.15926 |
| C  | -0.95923 | -3.02564 | -1.56220 |
| C  | -2.40180 | -2.05470 | 0.23887  |
| H  | -3.90348 | -1.22189 | -1.89685 |
| H  | -2.83307 | -1.78845 | -3.19429 |
| H  | -3.59559 | -2.94518 | -2.09366 |
| H  | -0.08312 | -3.02426 | -0.91157 |
| H  | -1.46814 | -3.98672 | -1.44420 |
| H  | -0.60812 | -2.95015 | -2.59191 |
| H  | -2.88543 | -3.02894 | 0.35517  |
| H  | -1.56855 | -2.01871 | 0.94388  |
| H  | -3.12788 | -1.29282 | 0.52944  |

##### R = Ph

|    |          |          |          |
|----|----------|----------|----------|
| P  | 0.77892  | 0.33462  | 0.64238  |
| C  | 0.55538  | -0.38892 | -0.80227 |
| P  | -0.93457 | -0.65562 | -1.69505 |
| O  | -0.44758 | -1.01925 | -3.09842 |
| Pb | 1.87258  | -1.04007 | -2.71429 |
| Cl | 2.04406  | -3.44837 | -2.04332 |
| C  | -1.99973 | 0.78948  | -1.73608 |
| H  | -2.86831 | 0.57077  | -2.35997 |
| H  | -2.32923 | 1.06295  | -0.73191 |
| H  | -1.44146 | 1.62224  | -2.16635 |
| Au | -0.70214 | 1.34600  | 1.94745  |
| Cl | -2.27881 | 2.36093  | 3.22185  |
| C  | 2.49746  | 0.27502  | 1.14377  |
| C  | 2.98164  | 1.26956  | 1.99368  |
| C  | 3.34389  | -0.75381 | 0.72296  |
| C  | 4.31059  | 1.25959  | 2.38448  |
| H  | 2.31502  | 2.05139  | 2.34329  |
| C  | 4.66793  | -0.76248 | 1.12661  |
| H  | 2.95396  | -1.56802 | 0.11998  |
| C  | 5.15349  | 0.24711  | 1.94862  |



|   |          |          |          |
|---|----------|----------|----------|
| H | 4.68674  | 2.03970  | 3.03578  |
| H | 5.31954  | -1.56881 | 0.81058  |
| H | 6.19071  | 0.23487  | 2.26343  |
| C | -1.87855 | -1.99912 | -0.96893 |
| C | -2.61756 | -1.81836 | 0.19990  |
| C | -1.84541 | -3.24577 | -1.58744 |
| C | -3.32464 | -2.87896 | 0.73942  |
| H | -2.63950 | -0.85600 | 0.70109  |
| C | -2.55615 | -4.30368 | -1.04119 |
| H | -1.25997 | -3.38042 | -2.48873 |
| C | -3.29457 | -4.12086 | 0.11798  |
| H | -3.89823 | -2.73586 | 1.64761  |
| H | -2.52779 | -5.27438 | -1.52213 |
| H | -3.84813 | -4.95017 | 0.54354  |

**R = Mes**

|    |          |          |          |
|----|----------|----------|----------|
| P  | 0.73454  | 0.52191  | 1.00353  |
| C  | 0.42080  | -0.43399 | -0.28025 |
| P  | -0.93507 | -0.66269 | -1.38092 |
| O  | -0.20244 | -0.69256 | -2.72487 |
| Pb | 2.01994  | -0.97667 | -1.97715 |
| Cl | 1.87074  | -3.45923 | -1.63770 |
| Au | -0.59326 | 1.79992  | 2.23854  |
| Cl | -1.96481 | 3.11891  | 3.47332  |
| C  | 2.50772  | 0.47140  | 1.34738  |
| C  | 3.28106  | 1.62247  | 1.12014  |
| C  | 3.09226  | -0.69805 | 1.86312  |
| C  | 4.64234  | 1.57055  | 1.38546  |
| C  | 4.45879  | -0.69298 | 2.11640  |
| C  | 5.25157  | 0.42269  | 1.87877  |
| H  | 5.24330  | 2.45718  | 1.20715  |
| H  | 4.91459  | -1.59047 | 2.52328  |
| C  | -1.86716 | -2.17932 | -1.04366 |
| C  | -2.39200 | -2.41148 | 0.24355  |
| C  | -2.11652 | -3.11195 | -2.07594 |
| C  | -3.13581 | -3.56047 | 0.47837  |
| C  | -2.86728 | -4.24291 | -1.77693 |
| C  | -3.37954 | -4.49602 | -0.51375 |
| H  | -3.53829 | -3.72177 | 1.47376  |
| H  | -3.06012 | -4.95318 | -2.57490 |
| C  | 2.67340  | 2.89173  | 0.60139  |
| H  | 2.15934  | 2.73755  | -0.35194 |
| H  | 1.93357  | 3.29526  | 1.29969  |
| H  | 3.43906  | 3.65256  | 0.44791  |
| C  | 2.29348  | -1.93155 | 2.16482  |
| H  | 1.37976  | -1.69246 | 2.71657  |
| H  | 1.99288  | -2.45553 | 1.25318  |
| H  | 2.87869  | -2.62342 | 2.77126  |
| C  | 6.72652  | 0.38555  | 2.13352  |
| H  | 7.26512  | 0.06794  | 1.23513  |
| H  | 7.10767  | 1.36953  | 2.41184  |
| H  | 6.97546  | -0.31867 | 2.92893  |
| C  | -2.17454 | -1.50046 | 1.41456  |
| H  | -2.93636 | -1.67558 | 2.17479  |
| H  | -1.20091 | -1.68675 | 1.87535  |
| H  | -2.20713 | -0.44008 | 1.16562  |
| C  | -1.63046 | -2.98850 | -3.49233 |
| H  | -1.85321 | -2.01899 | -3.93572 |
| H  | -0.54826 | -3.11862 | -3.54472 |
| H  | -2.09680 | -3.76400 | -4.10101 |
| C  | -4.15368 | -5.74501 | -0.23011 |
| H  | -4.72857 | -6.06386 | -1.10143 |
| H  | -3.47637 | -6.56410 | 0.03117  |
| H  | -4.84058 | -5.60776 | 0.60657  |
| C  | -2.11043 | 0.70168  | -1.40755 |
| H  | -2.67046 | 0.78860  | -0.47691 |

|   |          |         |          |
|---|----------|---------|----------|
| H | -1.56362 | 1.62827 | -1.58907 |
| H | -2.80797 | 0.52754 | -2.22966 |

**R = Mes\***

|    |          |          |          |
|----|----------|----------|----------|
| P  | 0.91516  | 1.17362  | -0.03155 |
| C  | 0.10410  | -0.18526 | -0.42968 |
| P  | -1.49825 | -0.86533 | -0.72290 |
| Cl | 1.56825  | -2.93693 | 1.81614  |
| O  | -1.27334 | -2.34166 | -0.36130 |
| C  | -3.14919 | -0.40253 | -0.06571 |
| C  | -3.66485 | -1.22137 | 0.97897  |
| C  | -4.07300 | 0.31560  | -0.86991 |
| C  | -5.00466 | -1.57771 | 0.92048  |
| C  | -5.40450 | -0.09168 | -0.86227 |
| C  | -5.88112 | -1.10328 | -0.04580 |
| H  | -5.38048 | -2.25723 | 1.67468  |
| H  | -6.09481 | 0.42198  | -1.51686 |
| C  | 2.68240  | 0.69969  | -0.05903 |
| C  | 3.36484  | 0.39527  | 1.14778  |
| C  | 3.27153  | 0.37212  | -1.30646 |
| C  | 4.48283  | -0.42984 | 1.06342  |
| C  | 4.37213  | -0.48087 | -1.29598 |
| C  | 4.96521  | -0.94116 | -0.13113 |
| H  | 4.97916  | -0.71152 | 1.97670  |
| H  | 4.79265  | -0.78639 | -2.24561 |
| C  | 3.00546  | 0.98643  | 2.52522  |
| C  | 2.89070  | 0.93994  | -2.69324 |
| C  | 6.12150  | -1.93378 | -0.19862 |
| C  | -3.79690 | 1.63267  | -1.62319 |
| C  | -2.91086 | -1.64438 | 2.25349  |
| C  | -7.31189 | -1.62352 | -0.11116 |
| C  | 4.17338  | 1.49209  | -3.34402 |
| H  | 3.92364  | 1.94488  | -4.30681 |
| H  | 4.62768  | 2.26136  | -2.71542 |
| H  | 4.92367  | 0.72412  | -3.53043 |
| C  | 1.91485  | 2.11473  | -2.67380 |
| H  | 0.89101  | 1.82070  | -2.44056 |
| H  | 2.22214  | 2.89506  | -1.97364 |
| H  | 1.88489  | 2.56480  | -3.66979 |
| C  | 2.31456  | -0.15763 | -3.59230 |
| H  | 2.99510  | -1.00710 | -3.68311 |
| H  | 1.36225  | -0.52036 | -3.19839 |
| H  | 2.13228  | 0.23453  | -4.59686 |
| C  | 7.27964  | -1.32558 | -0.99795 |
| H  | 8.11164  | -2.03312 | -1.05025 |
| H  | 6.98646  | -1.08237 | -2.02136 |
| H  | 7.64194  | -0.40919 | -0.52576 |
| C  | 6.63983  | -2.31435 | 1.18567  |
| H  | 7.44731  | -3.04316 | 1.08303  |
| H  | 7.04336  | -1.45139 | 1.72137  |
| H  | 5.85878  | -2.76881 | 1.79983  |
| C  | 5.63660  | -3.21100 | -0.89557 |
| H  | 4.82149  | -3.67470 | -0.33409 |
| H  | 5.28102  | -3.00951 | -1.90865 |
| H  | 6.45320  | -3.93466 | -0.96695 |
| C  | 3.93297  | 0.47124  | 3.63029  |
| H  | 4.98059  | 0.71957  | 3.44544  |
| H  | 3.64862  | 0.95137  | 4.56889  |
| H  | 3.84265  | -0.60854 | 3.77149  |
| C  | 3.20110  | 2.50704  | 2.45365  |
| H  | 4.23444  | 2.75289  | 2.19582  |
| H  | 2.54975  | 2.97480  | 1.71203  |
| H  | 2.97334  | 2.95927  | 3.42252  |
| C  | 1.58366  | 0.65339  | 2.98466  |
| H  | 0.81099  | 1.15411  | 2.39814  |
| H  | 1.39924  | -0.42106 | 2.95238  |

|    |          |          |          |
|----|----------|----------|----------|
| H  | 1.44976  | 1.00151  | 4.01269  |
| C  | -2.39777 | 2.18995  | -1.39895 |
| H  | -2.18616 | 2.27176  | -0.33088 |
| H  | -1.59761 | 1.61218  | -1.85646 |
| H  | -2.33361 | 3.19769  | -1.81506 |
| C  | -4.73969 | 2.68650  | -1.00363 |
| H  | -4.53441 | 3.66168  | -1.45263 |
| H  | -5.79183 | 2.45512  | -1.17065 |
| H  | -4.57588 | 2.77070  | 0.07273  |
| C  | -4.11364 | 1.54735  | -3.11937 |
| H  | -5.15048 | 1.25186  | -3.29223 |
| H  | -3.97000 | 2.52793  | -3.58094 |
| H  | -3.47785 | 0.83449  | -3.64456 |
| C  | -1.57857 | -0.92620 | 2.43582  |
| H  | -1.20708 | -1.11373 | 3.44591  |
| H  | -0.80489 | -1.28524 | 1.76307  |
| H  | -1.68976 | 0.15510  | 2.31821  |
| C  | -2.70838 | -3.16006 | 2.32475  |
| H  | -2.08550 | -3.50792 | 1.50288  |
| H  | -2.21926 | -3.42286 | 3.26657  |
| H  | -3.66485 | -3.68787 | 2.28563  |
| C  | -3.77495 | -1.20848 | 3.45424  |
| H  | -3.97507 | -0.13441 | 3.42819  |
| H  | -4.73092 | -1.73028 | 3.50568  |
| H  | -3.23254 | -1.42982 | 4.37686  |
| C  | -8.10657 | -0.99019 | -1.25007 |
| H  | -8.22609 | 0.08781  | -1.11523 |
| H  | -7.63494 | -1.16649 | -2.22019 |
| H  | -9.10724 | -1.42750 | -1.28351 |
| C  | -8.03239 | -1.31929 | 1.20773  |
| H  | -7.53990 | -1.79423 | 2.05837  |
| H  | -8.06511 | -0.24354 | 1.39658  |
| H  | -9.06048 | -1.68983 | 1.16807  |
| C  | -7.27761 | -3.14044 | -0.33247 |
| H  | -6.78158 | -3.38727 | -1.27436 |
| H  | -6.74478 | -3.65410 | 0.47006  |
| H  | -8.29544 | -3.53852 | -0.36856 |
| Au | 0.23461  | 3.24123  | 0.44907  |
| Cl | -0.45446 | 5.36232  | 0.89156  |
| C  | -1.68494 | -0.88189 | -2.52868 |
| H  | -2.62909 | -1.37614 | -2.76303 |
| H  | -1.64074 | 0.08557  | -3.01746 |
| H  | -0.87067 | -1.50513 | -2.90503 |
| Pb | 1.07975  | -2.41537 | -0.59441 |

#### Coordination through $\pi(\text{C}=\text{P})$ bond

##### R = H

|    |          |          |          |
|----|----------|----------|----------|
| P  | 0.86528  | -0.13003 | 0.91378  |
| C  | 0.44558  | 0.14599  | -0.73017 |
| P  | -1.14434 | -0.11045 | -1.46380 |
| O  | -0.93478 | 0.14511  | -2.94915 |
| Pb | 1.43415  | 0.02133  | -2.97404 |
| Cl | 1.44704  | -2.47139 | -2.80976 |
| C  | -2.50964 | 0.84047  | -0.79800 |
| H  | -3.42273 | 0.57129  | -1.33316 |
| H  | -2.63078 | 0.62160  | 0.26524  |
| H  | -2.31365 | 1.90555  | -0.93125 |
| Au | 0.69731  | 2.11447  | 0.09103  |
| Cl | 0.79977  | 4.36066  | 0.23917  |
| H  | -1.48547 | -1.45315 | -1.19966 |
| H  | 2.28896  | -0.15552 | 0.77977  |

##### R = Me

|   |         |          |         |
|---|---------|----------|---------|
| P | 0.87335 | -0.03786 | 0.84513 |
|---|---------|----------|---------|

|    |          |          |          |
|----|----------|----------|----------|
| C  | 0.37261  | 0.25739  | -0.76780 |
| P  | -1.21595 | -0.14519 | -1.45380 |
| O  | -0.99870 | -0.05747 | -2.96493 |
| Pb | 1.33815  | 0.09725  | -3.00537 |
| Cl | 1.74178  | -2.36228 | -2.64492 |
| C  | -2.56079 | 0.93198  | -0.94473 |
| H  | -3.47610 | 0.61605  | -1.45052 |
| H  | -2.70431 | 0.88135  | 0.13616  |
| H  | -2.33353 | 1.96004  | -1.22967 |
| C  | -1.66064 | -1.81053 | -0.95383 |
| H  | -1.81842 | -1.85930 | 0.12541  |
| H  | -2.57156 | -2.11082 | -1.47573 |
| H  | -0.84520 | -2.47838 | -1.23925 |
| C  | 2.70537  | -0.13021 | 0.76508  |
| H  | 3.13336  | 0.41042  | -0.07884 |
| H  | 3.13102  | 0.24273  | 1.69880  |
| H  | 2.96208  | -1.19116 | 0.67443  |
| Au | 0.50631  | 2.21825  | 0.09289  |
| Cl | 0.48473  | 4.45794  | 0.37666  |

##### R = *t*-Bu

|    |          |          |          |
|----|----------|----------|----------|
| P  | 0.75871  | -0.03767 | 0.78657  |
| C  | 0.32754  | 0.29319  | -0.84059 |
| P  | -1.18865 | -0.19432 | -1.65349 |
| O  | -0.83400 | -0.12269 | -3.14274 |
| Pb | 1.38794  | 0.58732  | -3.03699 |
| Cl | 2.43305  | -1.70427 | -3.09916 |
| C  | -2.54391 | 0.94428  | -1.30812 |
| H  | -3.42666 | 0.63504  | -1.87112 |
| H  | -2.77842 | 0.98342  | -0.24436 |
| H  | -2.25132 | 1.94051  | -1.64350 |
| Au | 0.18196  | 2.20742  | 0.14709  |
| Cl | -0.09141 | 4.40936  | 0.57766  |
| C  | 2.61998  | 0.06400  | 0.98595  |
| C  | 3.05115  | -1.40491 | 1.08565  |
| C  | 3.39172  | 0.75605  | -0.12234 |
| C  | 2.85341  | 0.76559  | 2.32463  |
| H  | 2.50455  | -1.93838 | 1.86878  |
| H  | 2.90747  | -1.92976 | 0.13773  |
| H  | 4.11555  | -1.45112 | 1.33770  |
| H  | 3.03842  | 1.77628  | -0.29488 |
| H  | 4.44999  | 0.81773  | 0.15301  |
| H  | 3.34734  | 0.18306  | -1.05214 |
| H  | 3.91100  | 0.69354  | 2.59676  |
| H  | 2.58814  | 1.82470  | 2.27637  |
| H  | 2.27088  | 0.30755  | 3.12915  |
| C  | -1.76864 | -1.88603 | -1.21527 |
| C  | -2.83193 | -2.27306 | -2.24787 |
| C  | -0.59813 | -2.86348 | -1.31039 |
| C  | -2.36301 | -1.90600 | 0.19165  |
| H  | -3.71396 | -1.63043 | -2.19813 |
| H  | -2.43347 | -2.23650 | -3.26267 |
| H  | -3.16082 | -3.29614 | -2.04379 |
| H  | 0.15714  | -2.67277 | -0.54619 |
| H  | -0.97703 | -3.87830 | -1.15760 |
| H  | -0.10654 | -2.82532 | -2.28356 |
| H  | -2.64478 | -2.93337 | 0.44031  |
| H  | -1.64724 | -1.57063 | 0.94648  |
| H  | -3.26285 | -1.29216 | 0.26852  |

##### R = Ph

|    |          |          |          |
|----|----------|----------|----------|
| P  | 0.77688  | 0.24336  | 0.81323  |
| C  | 0.25704  | 0.28535  | -0.81959 |
| P  | -1.36723 | -0.08598 | -1.42769 |
| O  | -1.25424 | 0.10747  | -2.93840 |
| Pb | 1.07828  | 0.35924  | -3.13600 |

|    |          |          |          |
|----|----------|----------|----------|
| Cl | 1.55422  | -2.10243 | -3.36020 |
| C  | -2.68666 | 0.93313  | -0.75395 |
| H  | -3.63221 | 0.62115  | -1.20195 |
| H  | -2.74454 | 0.82197  | 0.33022  |
| H  | -2.49367 | 1.97885  | -0.99862 |
| Au | 0.45748  | 2.37172  | -0.26391 |
| Cl | 0.48846  | 4.62802  | -0.35661 |
| C  | -1.77990 | -1.78765 | -1.01825 |
| C  | -1.86855 | -2.72230 | -2.04477 |
| C  | -2.01542 | -2.17608 | 0.30008  |
| C  | -2.19847 | -4.03754 | -1.75259 |
| H  | -1.66902 | -2.41573 | -3.06402 |
| C  | -2.34400 | -3.48993 | 0.58563  |
| H  | -1.93255 | -1.45872 | 1.11039  |
| C  | -2.43681 | -4.42028 | -0.44197 |
| H  | -2.26166 | -4.76529 | -2.55300 |
| H  | -2.52516 | -3.79063 | 1.61097  |
| H  | -2.69163 | -5.44952 | -0.21618 |
| C  | 2.58819  | 0.11480  | 0.74407  |
| C  | 3.25345  | -0.63775 | -0.22457 |
| C  | 3.32123  | 0.71862  | 1.76769  |
| C  | 4.63421  | -0.75306 | -0.18530 |
| H  | 2.69166  | -1.16354 | -0.99020 |
| C  | 4.70205  | 0.61624  | 1.79157  |
| H  | 2.80782  | 1.28418  | 2.53924  |
| C  | 5.35947  | -0.11863 | 0.81404  |
| H  | 5.14320  | -1.34706 | -0.93583 |
| H  | 5.26659  | 1.10572  | 2.57675  |
| H  | 6.43962  | -0.20719 | 0.83878  |

**R = Mes**

|    |          |          |          |
|----|----------|----------|----------|
| P  | 0.81420  | 0.15097  | 1.21337  |
| C  | 0.09886  | 0.31466  | -0.34194 |
| P  | -1.49650 | -0.04587 | -1.06220 |
| O  | -1.32091 | 0.46802  | -2.49165 |
| Pb | 0.96230  | 1.01237  | -2.53175 |
| Cl | 1.77457  | -1.18187 | -3.48098 |
| Au | 0.03298  | 2.31345  | 0.50698  |
| Cl | -0.36783 | 4.53353  | 0.70157  |
| C  | -1.85726 | -1.82246 | -0.97096 |
| C  | -1.94037 | -2.61705 | -2.13797 |
| C  | -2.06802 | -2.41971 | 0.28942  |
| C  | -2.16778 | -3.98166 | -1.99168 |
| C  | -2.27989 | -3.78948 | 0.36906  |
| C  | -2.31868 | -4.59499 | -0.75800 |
| H  | -2.22838 | -4.58659 | -2.89092 |
| H  | -2.42958 | -4.23471 | 1.34817  |
| C  | 2.61601  | 0.15166  | 0.89650  |
| C  | 3.15956  | -1.01610 | 0.32716  |
| C  | 3.46483  | 1.17061  | 1.35644  |
| C  | 4.53245  | -1.08788 | 0.13478  |
| C  | 4.83227  | 1.05150  | 1.13617  |
| C  | 5.38492  | -0.05605 | 0.50771  |
| H  | 4.94800  | -1.98882 | -0.30679 |
| H  | 5.48610  | 1.84657  | 1.48287  |
| C  | 2.95666  | 2.37678  | 2.08859  |
| H  | 2.58717  | 3.14841  | 1.40610  |
| H  | 2.13540  | 2.12902  | 2.76695  |
| H  | 3.75421  | 2.82492  | 2.68344  |
| C  | 2.31077  | -2.20210 | -0.02675 |
| H  | 1.56499  | -2.41480 | 0.74616  |
| H  | 1.77768  | -2.05520 | -0.96867 |
| H  | 2.93385  | -3.09052 | -0.13786 |
| C  | 6.85709  | -0.14350 | 0.24831  |
| H  | 7.21926  | -1.16841 | 0.34952  |
| H  | 7.08920  | 0.18331  | -0.77019 |

|   |          |          |          |
|---|----------|----------|----------|
| H | 7.42172  | 0.49099  | 0.93345  |
| C | -2.15359 | -1.65928 | 1.58249  |
| H | -1.85852 | -2.29850 | 2.41557  |
| H | -1.52182 | -0.77344 | 1.62309  |
| H | -3.18499 | -1.34330 | 1.76853  |
| C | -2.50771 | -6.07546 | -0.64814 |
| H | -3.04449 | -6.47322 | -1.51114 |
| H | -1.53904 | -6.58318 | -0.60450 |
| H | -3.05846 | -6.34231 | 0.25540  |
| C | -1.82495 | -2.10736 | -3.54585 |
| H | -2.46841 | -1.24865 | -3.73024 |
| H | -0.80464 | -1.79652 | -3.77589 |
| H | -2.09860 | -2.90455 | -4.23799 |
| C | -2.90625 | 0.84357  | -0.36844 |
| H | -3.04270 | 0.67278  | 0.69679  |
| H | -2.75098 | 1.90898  | -0.54846 |
| H | -3.79961 | 0.51980  | -0.90778 |

**R = Mes\***

|    |          |          |          |
|----|----------|----------|----------|
| P  | 0.67231  | -0.01869 | 1.17244  |
| C  | 0.38926  | 0.06609  | -0.53312 |
| P  | -1.05176 | -0.11111 | -1.63549 |
| O  | -0.35319 | -0.09476 | -3.00104 |
| Pb | 1.83023  | 0.58859  | -2.48907 |
| Cl | 2.96456  | -1.49313 | -3.36593 |
| Au | 0.36961  | 2.14547  | 0.11359  |
| Cl | 0.12809  | 4.40173  | -0.06756 |
| C  | 2.52807  | -0.07193 | 1.27023  |
| C  | 3.23180  | -1.19339 | 0.75121  |
| C  | 3.27549  | 1.05933  | 1.67646  |
| C  | 4.52962  | -0.99936 | 0.30125  |
| C  | 4.57867  | 1.18557  | 1.18785  |
| C  | 5.19931  | 0.21416  | 0.42247  |
| H  | 5.04787  | -1.83872 | -0.14342 |
| H  | 5.12802  | 2.08196  | 1.43946  |
| C  | 2.88822  | 2.08102  | 2.76775  |
| C  | 2.78043  | -2.65888 | 0.90777  |
| C  | 6.57927  | 0.39660  | -0.19944 |
| C  | -2.09594 | 1.37164  | -1.67128 |
| H  | -2.59266 | 1.60811  | -0.73566 |
| H  | -1.47206 | 2.21607  | -1.96899 |
| H  | -2.84317 | 1.19607  | -2.44831 |
| C  | 3.87465  | 1.82975  | 3.92706  |
| H  | 3.78436  | 0.80732  | 4.30273  |
| H  | 4.91073  | 1.98566  | 3.62451  |
| H  | 3.65504  | 2.51699  | 4.74877  |
| C  | 3.04794  | 3.53050  | 2.30137  |
| H  | 2.36939  | 3.77335  | 1.48236  |
| H  | 2.82084  | 4.20755  | 3.12949  |
| H  | 4.06602  | 3.74764  | 1.97408  |
| C  | 1.49739  | 1.91435  | 3.37238  |
| H  | 1.41770  | 2.56041  | 4.25085  |
| H  | 0.69456  | 2.21580  | 2.69580  |
| H  | 1.31094  | 0.88910  | 3.70104  |
| C  | 3.10692  | -3.51916 | -0.31484 |
| H  | 2.66425  | -3.11614 | -1.22433 |
| H  | 4.18128  | -3.60854 | -0.48276 |
| H  | 2.72472  | -4.53142 | -0.15709 |
| C  | 3.58529  | -3.19557 | 2.10761  |
| H  | 4.65944  | -3.13241 | 1.92515  |
| H  | 3.36361  | -2.62924 | 3.01589  |
| H  | 3.32887  | -4.24421 | 2.28570  |
| C  | 1.30985  | -2.86024 | 1.25313  |
| H  | 1.01884  | -2.31641 | 2.15790  |
| H  | 0.64460  | -2.58089 | 0.43705  |
| H  | 1.13677  | -3.92034 | 1.45965  |

|   |          |          |          |
|---|----------|----------|----------|
| C | 7.17933  | 1.76453  | 0.11377  |
| H | 6.54599  | 2.57844  | -0.24785 |
| H | 7.34128  | 1.90405  | 1.18593  |
| H | 8.14968  | 1.85786  | -0.37969 |
| C | 6.45090  | 0.26039  | -1.72153 |
| H | 7.43475  | 0.34281  | -2.19215 |
| H | 6.01320  | -0.69692 | -2.01059 |
| H | 5.81532  | 1.05007  | -2.13090 |
| C | 7.53838  | -0.67798 | 0.32605  |
| H | 7.63349  | -0.62079 | 1.41335  |
| H | 7.20498  | -1.68492 | 0.06859  |
| H | 8.53120  | -0.53806 | -0.11024 |
| C | -2.34321 | -1.44109 | -1.65342 |
| C | -2.32234 | -2.34702 | -2.75554 |
| C | -3.58990 | -1.22324 | -1.00455 |
| C | -3.52965 | -2.65501 | -3.36758 |
| C | -1.10255 | -3.14033 | -3.26095 |
| C | -4.75705 | -1.59800 | -1.66507 |
| C | -3.80535 | -0.76867 | 0.45299  |
| C | -4.76183 | -2.22432 | -2.89885 |
| H | -3.50005 | -3.27932 | -4.25089 |
| C | -0.61703 | -2.66749 | -4.63395 |
| C | -1.52291 | -4.61838 | -3.40211 |
| C | 0.02615  | -3.15779 | -2.23943 |
| H | -5.70084 | -1.38983 | -1.18096 |
| C | -2.52622 | -0.44557 | 1.20436  |
| C | -4.41956 | -1.98112 | 1.18230  |
| C | -4.77999 | 0.40685  | 0.58035  |
| C | -6.03496 | -2.52488 | -3.67986 |
| H | 0.20287  | -3.30579 | -4.97330 |
| H | -1.42381 | -2.73601 | -5.36907 |
| H | -0.26377 | -1.64086 | -4.60210 |
| H | -2.21421 | -4.79062 | -4.22775 |
| H | -0.62981 | -5.21543 | -3.60314 |
| H | -1.98338 | -4.99400 | -2.48500 |
| H | 0.45465  | -2.17856 | -2.04347 |
| H | -0.32327 | -3.59026 | -1.29849 |
| H | 0.84516  | -3.77486 | -2.61270 |
| H | -1.80396 | -1.25947 | 1.12256  |
| H | -2.04865 | 0.47720  | 0.87695  |
| H | -2.74750 | -0.31410 | 2.26612  |
| H | -4.56724 | -1.73474 | 2.23747  |
| H | -5.38466 | -2.26926 | 0.76437  |
| H | -3.75508 | -2.84641 | 1.12378  |
| H | -5.76189 | 0.17459  | 0.16509  |
| H | -4.92125 | 0.64978  | 1.63679  |
| H | -4.41591 | 1.30534  | 0.08011  |
| C | -7.27739 | -1.95191 | -3.00331 |
| C | -6.21322 | -4.04202 | -3.81260 |
| C | -5.91656 | -1.90404 | -5.07689 |
| H | -7.45622 | -2.40553 | -2.02506 |
| H | -7.20525 | -0.86910 | -2.87352 |
| H | -8.15518 | -2.15393 | -3.62163 |
| H | -5.37601 | -4.50474 | -4.33859 |
| H | -6.29472 | -4.51390 | -2.83033 |
| H | -7.12458 | -4.26513 | -4.37423 |
| H | -5.80368 | -0.81894 | -5.01463 |
| H | -5.05758 | -2.29854 | -5.62310 |
| H | -6.81468 | -2.12008 | -5.66200 |

**[R-P=C(Pb(II)Cl)-P(S)ClR](AuCl)**

Coordination through Pb(II) atom

R= H

|    |          |          |          |
|----|----------|----------|----------|
| P  | 0.85812  | 0.50629  | 0.64378  |
| C  | 0.40446  | -0.01987 | -0.86145 |
| P  | -1.23757 | -0.32377 | -1.38076 |
| Pb | 1.36022  | -0.05595 | -2.95982 |
| Cl | 1.26032  | -2.49436 | -3.19750 |
| Au | 2.99073  | 1.51417  | -4.23192 |
| Cl | 4.42334  | 2.90982  | -5.26705 |
| Cl | -2.64504 | 0.40798  | -0.14131 |
| H  | 2.25804  | 0.64239  | 0.38661  |
| H  | -1.49865 | -1.70043 | -1.27550 |
| S  | -1.36300 | 0.34842  | -3.24003 |

R = Me

|    |          |          |          |
|----|----------|----------|----------|
| P  | 0.85491  | 0.24846  | 0.73057  |
| C  | 0.36468  | -0.11953 | -0.80731 |
| P  | -1.30102 | -0.28861 | -1.31766 |
| Pb | 1.30844  | -0.05470 | -2.90540 |
| Cl | 1.24558  | -2.48774 | -3.31164 |
| C  | -1.83956 | -1.99551 | -1.19862 |
| H  | -1.82217 | -2.31259 | -0.15486 |
| H  | -2.84810 | -2.07825 | -1.60585 |
| H  | -1.14541 | -2.59601 | -1.79184 |
| C  | 2.68192  | 0.34242  | 0.64230  |
| H  | 3.10036  | 0.09940  | -0.33440 |
| H  | 2.99112  | 1.35122  | 0.93157  |
| H  | 3.09252  | -0.34102 | 1.39135  |
| Au | 3.03475  | 1.48858  | -4.08163 |
| Cl | 4.57344  | 2.85670  | -5.00134 |
| Cl | -2.59720 | 0.69327  | -0.10996 |
| S  | -1.35417 | 0.41416  | -3.18617 |

R = t-Bu

|    |          |          |          |
|----|----------|----------|----------|
| P  | 0.72458  | -0.02975 | 0.61390  |
| C  | 0.47614  | -0.13425 | -1.02295 |
| P  | -1.14086 | -0.39920 | -1.68462 |
| Pb | 1.60422  | 0.30153  | -2.98327 |
| Cl | 2.37482  | -1.99285 | -3.46219 |
| Au | 2.88512  | 2.34060  | -3.96348 |
| Cl | 4.00735  | 4.15141  | -4.71323 |
| C  | 2.54338  | 0.19272  | 0.97536  |
| C  | 2.91404  | -1.04305 | 1.80481  |
| C  | 3.46682  | 0.31884  | -0.21996 |
| C  | 2.62838  | 1.44376  | 1.85564  |
| H  | 2.24702  | -1.17617 | 2.66116  |
| H  | 2.88814  | -1.95522 | 1.20378  |
| H  | 3.93078  | -0.92366 | 2.19235  |
| H  | 3.26262  | 1.22439  | -0.79874 |
| H  | 4.50371  | 0.40006  | 0.12235  |
| H  | 3.41748  | -0.55910 | -0.87091 |
| H  | 3.64986  | 1.55294  | 2.23315  |
| H  | 2.37904  | 2.34929  | 1.29725  |
| H  | 1.95954  | 1.38044  | 2.71828  |
| C  | -1.82514 | -2.09898 | -1.40797 |
| C  | -3.16432 | -2.19341 | -2.13715 |
| C  | -0.82557 | -3.08785 | -2.00807 |
| C  | -2.00538 | -2.36410 | 0.08301  |
| H  | -3.90586 | -1.50859 | -1.72254 |
| H  | -3.05787 | -1.99225 | -3.20465 |
| H  | -3.54457 | -3.21216 | -2.02297 |
| H  | 0.14757  | -3.04176 | -1.51706 |
| H  | -1.22595 | -4.09686 | -1.87598 |
| H  | -0.67234 | -2.91967 | -3.07467 |

|    |          |          |          |
|----|----------|----------|----------|
| H  | -2.38050 | -3.38413 | 0.20407  |
| H  | -1.06372 | -2.29130 | 0.63071  |
| H  | -2.72532 | -1.68357 | 0.53898  |
| Cl | -2.48283 | 0.81869  | -0.75396 |
| S  | -1.02122 | 0.06946  | -3.62405 |

**R = Ph**

|    |          |          |          |
|----|----------|----------|----------|
| P  | 0.78939  | 0.38577  | 0.70801  |
| C  | 0.34226  | -0.11496 | -0.81010 |
| P  | -1.28980 | -0.28215 | -1.41691 |
| Pb | 1.48037  | -0.14154 | -2.79155 |
| Cl | 1.59531  | -2.58655 | -3.11295 |
| Au | 3.18676  | 1.41451  | -3.98331 |
| Cl | 4.70005  | 2.78322  | -4.95012 |
| C  | 2.59582  | 0.31260  | 0.66255  |
| C  | 3.29098  | 1.29620  | 1.36953  |
| C  | 3.31359  | -0.68031 | -0.01307 |
| C  | 4.67620  | 1.32274  | 1.35157  |
| H  | 2.74262  | 2.05433  | 1.91990  |
| C  | 4.69837  | -0.65847 | -0.01444 |
| H  | 2.78934  | -1.49522 | -0.50396 |
| C  | 5.37925  | 0.34908  | 0.65677  |
| H  | 5.20838  | 2.10376  | 1.88178  |
| H  | 5.24771  | -1.43235 | -0.53770 |
| H  | 6.46276  | 0.36834  | 0.64594  |
| C  | -1.94700 | -1.92505 | -1.09532 |
| C  | -2.10301 | -2.82258 | -2.14525 |
| C  | -2.24313 | -2.30874 | 0.21267  |
| C  | -2.56609 | -4.10395 | -1.88575 |
| H  | -1.85678 | -2.51979 | -3.15545 |
| C  | -2.70320 | -3.58840 | 0.46117  |
| H  | -2.12096 | -1.60953 | 1.03235  |
| C  | -2.86550 | -4.48554 | -0.58814 |
| H  | -2.68748 | -4.80441 | -2.70324 |
| H  | -2.93728 | -3.88821 | 1.47579  |
| H  | -3.22604 | -5.48816 | -0.38885 |
| Cl | -2.56136 | 0.94363  | -0.41326 |
| S  | -1.19376 | 0.17858  | -3.35128 |

**R = Mes**

|    |          |          |          |
|----|----------|----------|----------|
| P  | 0.85888  | 0.20176  | 1.23168  |
| C  | 0.32162  | -0.20772 | -0.28574 |
| P  | -1.28470 | -0.22698 | -1.00709 |
| Pb | 1.61916  | 0.01627  | -2.14056 |
| Cl | 1.51561  | -2.32766 | -2.93346 |
| Au | 3.61557  | 1.50313  | -2.89810 |
| Cl | 5.42403  | 2.77270  | -3.39924 |
| C  | 2.66187  | 0.24999  | 0.94768  |
| C  | 3.28700  | 1.50778  | 0.89232  |
| C  | 3.40827  | -0.92725 | 0.77887  |
| C  | 4.64170  | 1.56752  | 0.60264  |
| C  | 4.76610  | -0.81297 | 0.49638  |
| C  | 5.39704  | 0.41940  | 0.38374  |
| H  | 5.11922  | 2.53929  | 0.52426  |
| H  | 5.34753  | -1.71978 | 0.35980  |
| C  | -1.99639 | -1.89325 | -1.05608 |
| C  | -2.30933 | -2.55793 | -2.26644 |
| C  | -2.18335 | -2.56280 | 0.17823  |
| C  | -2.73676 | -3.87863 | -2.19657 |
| C  | -2.60264 | -3.88557 | 0.16823  |
| C  | -2.87197 | -4.57117 | -1.00467 |
| H  | -2.97229 | -4.38422 | -3.12721 |
| H  | -2.73287 | -4.38955 | 1.12066  |
| Cl | -2.61939 | 0.88794  | 0.06427  |
| C  | 2.50743  | 2.77539  | 1.08449  |
| H  | 1.81833  | 2.70654  | 1.93218  |

|   |          |          |          |
|---|----------|----------|----------|
| H | 3.17614  | 3.61811  | 1.26192  |
| H | 1.90752  | 3.01488  | 0.20063  |
| C | 2.78977  | -2.29004 | 0.90394  |
| H | 2.08806  | -2.33912 | 1.74137  |
| H | 2.23671  | -2.57435 | 0.00380  |
| H | 3.56130  | -3.04350 | 1.06705  |
| C | 6.84351  | 0.52572  | 0.01798  |
| H | 6.94891  | 0.99533  | -0.96474 |
| H | 7.38710  | 1.14758  | 0.73351  |
| H | 7.32070  | -0.45419 | -0.01800 |
| C | -2.02802 | -1.93342 | 1.52993  |
| H | -1.15860 | -1.28394 | 1.62077  |
| H | -2.90345 | -1.32722 | 1.77473  |
| H | -1.93737 | -2.71015 | 2.28961  |
| C | -2.24079 | -1.97029 | -3.64532 |
| H | -2.79429 | -1.03585 | -3.72934 |
| H | -1.21187 | -1.77122 | -3.94741 |
| H | -2.66684 | -2.68081 | -4.35396 |
| C | -3.28458 | -6.00840 | -0.98752 |
| H | -2.40824 | -6.65641 | -1.08787 |
| H | -3.78157 | -6.27076 | -0.05232 |
| H | -3.95677 | -6.23971 | -1.81544 |
| S | -0.95733 | 0.75304  | -2.71993 |

**R = Mes\***

|    |          |          |          |
|----|----------|----------|----------|
| P  | 0.13246  | 2.21629  | 1.01999  |
| C  | 0.46114  | 0.70095  | 0.41208  |
| P  | 1.97783  | -0.19212 | 0.24493  |
| Cl | -1.28020 | 0.47491  | -2.81078 |
| C  | 3.71792  | 0.37948  | 0.14180  |
| C  | 4.30788  | 0.36927  | -1.15879 |
| C  | 4.57667  | 0.31459  | 1.27246  |
| C  | 5.59772  | -0.12553 | -1.26824 |
| C  | 5.86311  | -0.17737 | 1.07227  |
| C  | 6.36394  | -0.51085 | -0.17522 |
| H  | 6.02987  | -0.19384 | -2.25870 |
| H  | 6.49977  | -0.28880 | 1.93876  |
| C  | -1.69630 | 2.28192  | 0.85341  |
| C  | -2.26825 | 3.07956  | -0.16637 |
| C  | -2.52590 | 1.43807  | 1.63643  |
| C  | -3.57689 | 2.80037  | -0.54935 |
| C  | -3.81502 | 1.19537  | 1.17379  |
| C  | -4.34581 | 1.81328  | 0.04889  |
| H  | -4.00782 | 3.36587  | -1.35945 |
| H  | -4.44160 | 0.51006  | 1.72856  |
| C  | -1.55093 | 4.28805  | -0.79751 |
| C  | -2.15990 | 0.88925  | 3.03438  |
| C  | -5.74434 | 1.44769  | -0.43726 |
| C  | 4.32253  | 0.93259  | 2.66417  |
| C  | 3.74881  | 1.05828  | -2.42153 |
| C  | 7.72205  | -1.16862 | -0.37888 |
| C  | -3.39613 | 0.96894  | 3.94699  |
| H  | -3.09774 | 0.73186  | 4.97104  |
| H  | -3.83538 | 1.96913  | 3.94197  |
| H  | -4.16974 | 0.25219  | 3.67007  |
| C  | -1.08861 | 1.73555  | 3.72114  |
| H  | -0.10279 | 1.65122  | 3.24998  |
| H  | -1.36399 | 2.79257  | 3.74798  |
| H  | -0.95484 | 1.39102  | 4.75001  |
| C  | -1.70706 | -0.57189 | 2.99602  |
| H  | -2.45211 | -1.20673 | 2.50999  |
| H  | -0.75729 | -0.68790 | 2.47265  |
| H  | -1.56766 | -0.94556 | 4.01464  |
| C  | -6.76567 | 1.73075  | 0.67106  |
| H  | -7.77058 | 1.47121  | 0.32735  |
| H  | -6.56340 | 1.14608  | 1.57057  |

|    |          |          |          |
|----|----------|----------|----------|
| H  | -6.76285 | 2.78836  | 0.94733  |
| C  | -6.15049 | 2.24010  | -1.67714 |
| H  | -7.14366 | 1.92040  | -2.00089 |
| H  | -6.20014 | 3.31439  | -1.48000 |
| H  | -5.46182 | 2.07115  | -2.50860 |
| C  | -5.77516 | -0.04425 | -0.78879 |
| H  | -5.06652 | -0.27256 | -1.58855 |
| H  | -5.52711 | -0.67589 | 0.06639  |
| H  | -6.77395 | -0.32868 | -1.13070 |
| C  | -2.46440 | 5.05846  | -1.75386 |
| H  | -3.37522 | 5.40892  | -1.26312 |
| H  | -1.92719 | 5.93763  | -2.11672 |
| H  | -2.74281 | 4.46238  | -2.62590 |
| C  | -1.15389 | 5.26014  | 0.32297  |
| H  | -2.03187 | 5.58138  | 0.88863  |
| H  | -0.44481 | 4.81577  | 1.02493  |
| H  | -0.68022 | 6.14793  | -0.10533 |
| C  | -0.31046 | 3.89532  | -1.60064 |
| H  | 0.49092  | 3.51050  | -0.96371 |
| H  | -0.53903 | 3.13081  | -2.34421 |
| H  | 0.09297  | 4.77671  | -2.10796 |
| C  | 2.97546  | 1.62513  | 2.81949  |
| H  | 2.79711  | 2.33434  | 2.00860  |
| H  | 2.13984  | 0.93124  | 2.87501  |
| H  | 2.97384  | 2.19538  | 3.75186  |
| C  | 5.37383  | 2.05628  | 2.79833  |
| H  | 5.22126  | 2.57825  | 3.74681  |
| H  | 6.39494  | 1.67471  | 2.78525  |
| H  | 5.27407  | 2.78409  | 1.98953  |
| C  | 4.53254  | -0.05481 | 3.81497  |
| H  | 5.52573  | -0.50670 | 3.78957  |
| H  | 4.43816  | 0.47382  | 4.76724  |
| H  | 3.79637  | -0.85733 | 3.80021  |
| C  | 2.41569  | 1.76666  | -2.22009 |
| H  | 2.22099  | 2.40606  | -3.08443 |
| H  | 1.56789  | 1.08900  | -2.14492 |
| H  | 2.44379  | 2.41102  | -1.33807 |
| C  | 3.65861  | 0.12542  | -3.63081 |
| H  | 2.91921  | -0.65866 | -3.47355 |
| H  | 3.36060  | 0.70130  | -4.51078 |
| H  | 4.61734  | -0.34654 | -3.85548 |
| C  | 4.76292  | 2.17690  | -2.74680 |
| H  | 4.86959  | 2.86685  | -1.90595 |
| H  | 5.75162  | 1.78754  | -2.99136 |
| H  | 4.40260  | 2.74439  | -3.60878 |
| C  | 8.39428  | -1.52793 | 0.94342  |
| H  | 8.62606  | -0.64136 | 1.53926  |
| H  | 7.77327  | -2.19637 | 1.54491  |
| H  | 9.33751  | -2.04165 | 0.74418  |
| C  | 8.64704  | -0.21973 | -1.15055 |
| H  | 8.24698  | 0.02755  | -2.13577 |
| H  | 8.79659  | 0.71415  | -0.60314 |
| H  | 9.62398  | -0.68812 | -1.29721 |
| C  | 7.52567  | -2.45679 | -1.18772 |
| H  | 6.87810  | -3.15817 | -0.65641 |
| H  | 7.07458  | -2.25788 | -2.16181 |
| H  | 8.48990  | -2.94347 | -1.35706 |
| Au | -2.70598 | -2.58387 | -0.15540 |
| Cl | -4.27195 | -4.12669 | 0.39302  |
| Pb | -0.93951 | -0.74667 | -0.68171 |
| Cl | 1.99537  | -1.39739 | 1.91620  |
| S  | 1.61714  | -1.48550 | -1.24142 |

#### Coordination through S atom

##### R= H

|    |          |          |          |
|----|----------|----------|----------|
| P  | 0.89866  | 0.11767  | 1.05349  |
| C  | 0.60297  | -0.15506 | -0.55454 |
| P  | -0.89646 | 0.16422  | -1.35234 |
| Pb | 1.92303  | -0.53152 | -2.53831 |
| Cl | 0.69129  | -2.62896 | -3.03933 |
| Au | -1.96850 | 0.77745  | -4.53975 |
| Cl | -3.56313 | 0.41534  | -6.08544 |
| Cl | -2.35203 | 1.06322  | -0.29241 |
| H  | 2.27610  | -0.27562 | 1.07470  |
| H  | -1.49938 | -1.04877 | -1.71195 |
| S  | -0.34773 | 1.20752  | -3.00574 |

##### R = Me

|    |          |          |          |
|----|----------|----------|----------|
| P  | 0.90809  | 0.13432  | 1.05823  |
| C  | 0.59150  | -0.11794 | -0.54762 |
| P  | -0.96160 | 0.15765  | -1.25899 |
| Pb | 1.92088  | -0.32733 | -2.55009 |
| Cl | 1.14746  | -2.63851 | -3.08058 |
| C  | -1.86839 | -1.36655 | -1.50334 |
| H  | -2.07648 | -1.80108 | -0.52364 |
| H  | -2.79620 | -1.14862 | -2.03392 |
| H  | -1.24152 | -2.03980 | -2.09346 |
| C  | 2.67234  | -0.32531 | 1.27370  |
| H  | 3.15297  | -0.69006 | 0.36569  |
| H  | 3.21702  | 0.54132  | 1.65999  |
| H  | 2.72920  | -1.10091 | 2.04339  |
| Au | -2.09761 | 0.54633  | -4.53164 |
| Cl | -3.68092 | 0.04988  | -6.05478 |
| Cl | -2.23015 | 1.29897  | -0.16304 |
| S  | -0.50068 | 1.10249  | -3.01108 |

##### R = t-Bu

|    |          |          |          |
|----|----------|----------|----------|
| P  | 0.98540  | 0.11770  | 0.74989  |
| C  | 0.75370  | -0.10741 | -0.87928 |
| P  | -0.84438 | 0.14707  | -1.53834 |
| Pb | 2.15016  | -0.21936 | -2.83763 |
| Cl | 2.11455  | -2.70815 | -3.09639 |
| C  | -1.97298 | -1.32898 | -1.41637 |
| C  | 2.74123  | -0.34494 | 1.20201  |
| Au | -2.05810 | 0.32090  | -4.95008 |
| Cl | -3.59924 | -0.12081 | -6.53605 |
| Cl | -1.86056 | 1.60640  | -0.54140 |
| S  | -0.44927 | 0.82333  | -3.42536 |
| C  | 3.69125  | -0.61249 | 0.05146  |
| H  | 3.35191  | -1.44688 | -0.56989 |
| H  | 3.83642  | 0.28222  | -0.56355 |
| H  | 4.67902  | -0.88708 | 0.43691  |
| C  | 3.25926  | 0.80610  | 2.06849  |
| H  | 2.57981  | 1.02589  | 2.89626  |
| H  | 4.23046  | 0.53765  | 2.49614  |
| H  | 3.38956  | 1.72322  | 1.48805  |
| C  | 2.58903  | -1.60462 | 2.06334  |
| H  | 3.55708  | -1.86155 | 2.50588  |
| H  | 1.88134  | -1.45419 | 2.88354  |
| H  | 2.25117  | -2.45826 | 1.47098  |
| C  | -1.98607 | -1.78092 | 0.04378  |
| H  | -2.69722 | -2.60713 | 0.12751  |
| H  | -1.01083 | -2.14479 | 0.36857  |
| H  | -2.31254 | -0.99023 | 0.72209  |
| C  | -3.38459 | -0.94931 | -1.85597 |
| H  | -3.84503 | -0.22474 | -1.18438 |
| H  | -3.41127 | -0.55488 | -2.87465 |
| H  | -3.99107 | -1.85882 | -1.84437 |

|   |          |          |          |
|---|----------|----------|----------|
| C | -1.41359 | -2.43390 | -2.30834 |
| H | -1.43631 | -2.15529 | -3.36320 |
| H | -0.39159 | -2.71086 | -2.04617 |
| H | -2.04651 | -3.31698 | -2.18413 |

**R = Ph**

|    |          |          |          |
|----|----------|----------|----------|
| P  | 0.85993  | 0.54383  | 0.85395  |
| C  | 0.55410  | -0.07172 | -0.65641 |
| P  | -0.95175 | 0.03249  | -1.49942 |
| Pb | 2.13505  | -0.56272 | -2.37340 |
| Cl | 1.73159  | -3.02537 | -2.50231 |
| Au | -2.03098 | 0.02904  | -4.86595 |
| Cl | -3.63556 | -0.40207 | -6.39010 |
| C  | 2.58411  | 0.05021  | 1.14301  |
| C  | 3.12291  | -1.16230 | 0.69691  |
| C  | 3.39211  | 0.92225  | 1.87522  |
| C  | 4.45216  | -1.47020 | 0.94404  |
| H  | 2.48646  | -1.89023 | 0.20104  |
| C  | 4.72386  | 0.61684  | 2.10895  |
| H  | 2.97646  | 1.85154  | 2.25255  |
| C  | 5.25541  | -0.57666 | 1.64045  |
| H  | 4.85638  | -2.41658 | 0.60333  |
| H  | 5.34738  | 1.30880  | 2.66326  |
| H  | 6.29416  | -0.81923 | 1.83277  |
| C  | -1.90033 | -1.48613 | -1.35685 |
| C  | -2.66849 | -1.70248 | -0.21239 |
| C  | -1.80666 | -2.46724 | -2.33854 |
| C  | -3.34954 | -2.89665 | -0.06380 |
| H  | -2.74458 | -0.93929 | 0.55278  |
| C  | -2.49548 | -3.65925 | -2.17967 |
| H  | -1.20145 | -2.30835 | -3.22106 |
| C  | -3.26565 | -3.87318 | -1.04827 |
| H  | -3.95426 | -3.06245 | 0.81986  |
| H  | -2.42888 | -4.41801 | -2.94964 |
| H  | -3.80718 | -4.80482 | -0.93132 |
| Cl | -2.19204 | 1.46701  | -0.76897 |
| S  | -0.37344 | 0.51287  | -3.38546 |

**R = Mes**

|    |          |          |          |
|----|----------|----------|----------|
| P  | 0.71571  | 0.24598  | 1.25883  |
| C  | 0.38582  | -0.18340 | -0.30738 |
| P  | -1.06333 | -0.05692 | -1.25537 |
| Pb | 2.21152  | -0.35906 | -1.81145 |
| Cl | 1.93055  | -2.80362 | -2.28194 |
| Au | -1.83996 | 1.49155  | -4.39522 |
| Cl | -3.36242 | 2.23507  | -5.88403 |
| C  | 2.52759  | -0.05626 | 1.31607  |
| C  | 3.03894  | -1.35898 | 1.45599  |
| C  | 3.39855  | 1.04772  | 1.28068  |
| C  | 4.41894  | -1.52917 | 1.50600  |
| C  | 4.76808  | 0.82498  | 1.33404  |
| C  | 5.29915  | -0.45637 | 1.43717  |
| H  | 4.81535  | -2.53406 | 1.61621  |
| H  | 5.43951  | 1.67810  | 1.30320  |
| C  | -1.94944 | -1.63783 | -1.33403 |
| C  | -2.53423 | -2.10152 | -0.13079 |
| C  | -2.02023 | -2.43459 | -2.50241 |
| C  | -3.16530 | -3.33831 | -0.12618 |
| C  | -2.67817 | -3.65542 | -2.42220 |
| C  | -3.25851 | -4.13066 | -1.25726 |
| H  | -3.60151 | -3.68686 | 0.80463  |
| H  | -2.72780 | -4.26241 | -3.32007 |
| Cl | -2.42953 | 1.29497  | -0.57035 |
| C  | 2.87060  | 2.44863  | 1.17520  |
| H  | 2.42502  | 2.64383  | 0.19459  |
| H  | 2.09006  | 2.64112  | 1.91778  |

|   |          |          |          |
|---|----------|----------|----------|
| H | 3.66712  | 3.17750  | 1.32803  |
| C | 2.13963  | -2.55425 | 1.57062  |
| H | 1.30224  | -2.36219 | 2.24745  |
| H | 1.71563  | -2.83403 | 0.60181  |
| H | 2.69271  | -3.41350 | 1.95155  |
| C | 6.78054  | -0.67369 | 1.46574  |
| H | 7.17487  | -0.78262 | 0.45059  |
| H | 7.29791  | 0.16890  | 1.92768  |
| H | 7.03934  | -1.58044 | 2.01466  |
| C | -2.56572 | -1.35020 | 1.16785  |
| H | -1.65734 | -0.78716 | 1.37847  |
| H | -3.39419 | -0.63857 | 1.18515  |
| H | -2.71338 | -2.05196 | 1.98946  |
| C | -1.44592 | -2.08892 | -3.84203 |
| H | -1.90244 | -1.19230 | -4.26517 |
| H | -0.36975 | -1.92511 | -3.79598 |
| H | -1.62721 | -2.91180 | -4.53291 |
| C | -3.97383 | -5.44384 | -1.23278 |
| H | -4.07905 | -5.82296 | -0.21544 |
| H | -4.97839 | -5.33997 | -1.65423 |
| H | -3.44835 | -6.19198 | -1.82939 |
| S | -0.25854 | 0.79151  | -2.91487 |

**R = Mes\***

|   |          |          |          |
|---|----------|----------|----------|
| P | 1.78778  | 2.14533  | 0.10305  |
| C | 0.92176  | 0.75060  | -0.15515 |
| P | -0.80082 | 0.50801  | -0.22643 |
| C | 3.51607  | 1.50978  | -0.03967 |
| C | 4.30222  | 1.37185  | 1.13423  |
| C | 4.00421  | 1.00331  | -1.26595 |
| C | 5.38866  | 0.51083  | 1.08781  |
| C | 5.08222  | 0.11482  | -1.22315 |
| C | 5.75440  | -0.19451 | -0.05355 |
| H | 5.96799  | 0.35984  | 1.98647  |
| H | 5.42329  | -0.32241 | -2.15052 |
| C | 3.54355  | 1.46569  | -2.66705 |
| C | 4.04721  | 2.18006  | 2.41977  |
| C | 6.89890  | -1.20044 | 0.00575  |
| C | 2.73559  | 1.79306  | 3.10513  |
| H | 1.86062  | 2.08190  | 2.51756  |
| H | 2.67730  | 0.71738  | 3.27776  |
| H | 2.65489  | 2.31366  | 4.06402  |
| C | 4.03293  | 3.67549  | 2.07308  |
| H | 4.97815  | 3.97783  | 1.61539  |
| H | 3.22579  | 3.93516  | 1.38490  |
| H | 3.89060  | 4.26565  | 2.98262  |
| C | 5.15860  | 1.97434  | 3.45184  |
| H | 5.18655  | 0.94890  | 3.82745  |
| H | 6.14377  | 2.23109  | 3.05508  |
| H | 4.96678  | 2.62815  | 4.30553  |
| C | 2.64039  | 0.43752  | -3.35224 |
| H | 1.68069  | 0.34255  | -2.84192 |
| H | 2.43540  | 0.74376  | -4.38224 |
| H | 3.11889  | -0.54488 | -3.38972 |
| C | 2.83953  | 2.82115  | -2.63672 |
| H | 1.86076  | 2.78925  | -2.15003 |
| H | 3.44734  | 3.57705  | -2.13387 |
| H | 2.65583  | 3.15947  | -3.66008 |
| C | 4.78358  | 1.67072  | -3.55624 |
| H | 5.51382  | 2.32560  | -3.07557 |
| H | 5.28167  | 0.73509  | -3.81223 |
| H | 4.47575  | 2.13536  | -4.49619 |
| C | 7.12327  | -1.90101 | -1.33164 |
| H | 7.42182  | -1.20128 | -2.11666 |
| H | 7.92501  | -2.63571 | -1.22752 |
| H | 6.22924  | -2.43426 | -1.66538 |

|    |          |          |          |
|----|----------|----------|----------|
| C  | 6.57730  | -2.26642 | 1.06003  |
| H  | 6.45233  | -1.83095 | 2.05290  |
| H  | 5.65308  | -2.79612 | 0.81881  |
| H  | 7.38952  | -2.99664 | 1.11308  |
| C  | 8.19426  | -0.47748 | 0.39428  |
| H  | 8.10981  | 0.00767  | 1.36871  |
| H  | 9.02110  | -1.19111 | 0.44786  |
| H  | 8.45225  | 0.28813  | -0.34179 |
| C  | -2.25398 | 1.49572  | 0.27097  |
| C  | -2.89724 | 1.10686  | 1.47939  |
| C  | -3.01560 | 2.19963  | -0.70841 |
| C  | -4.28621 | 1.04102  | 1.47131  |
| C  | -4.39383 | 2.09673  | -0.63374 |
| C  | -5.05615 | 1.41570  | 0.38284  |
| H  | -4.77943 | 0.67556  | 2.36103  |
| H  | -4.98327 | 2.58175  | -1.40178 |
| C  | -2.22844 | 0.95178  | 2.86015  |
| C  | -2.55536 | -0.37277 | 3.55314  |
| C  | -2.81920 | 2.09983  | 3.70810  |
| H  | -2.11507 | -1.21929 | 3.02792  |
| H  | -2.15103 | -0.35737 | 4.56870  |
| H  | -3.63057 | -0.54300 | 3.62906  |
| H  | -2.61623 | 3.07111  | 3.25001  |
| H  | -3.89773 | 2.00584  | 3.83749  |
| H  | -2.35721 | 2.08657  | 4.69889  |
| C  | -2.47420 | 3.24269  | -1.70864 |
| C  | -3.07949 | 4.58680  | -1.25072 |
| C  | -2.91988 | 2.98491  | -3.15022 |
| H  | -2.79394 | 4.81337  | -0.22068 |
| H  | -2.70493 | 5.38875  | -1.89287 |
| H  | -4.16828 | 4.59026  | -1.30692 |
| H  | -2.50332 | 2.05868  | -3.54427 |
| H  | -4.00612 | 2.92841  | -3.23768 |
| H  | -2.58239 | 3.80698  | -3.78721 |
| C  | -6.56098 | 1.20183  | 0.31498  |
| C  | -7.27262 | 2.55989  | 0.34693  |
| C  | -7.07203 | 0.35213  | 1.47546  |
| H  | -6.98079 | 3.19167  | -0.49492 |
| H  | -8.35470 | 2.41335  | 0.29275  |
| H  | -7.04878 | 3.10156  | 1.26963  |
| H  | -6.58017 | -0.62304 | 1.50331  |
| H  | -6.93220 | 0.84620  | 2.44081  |
| H  | -8.14356 | 0.17922  | 1.35216  |
| Cl | 2.50134  | -1.80468 | 1.99850  |
| Cl | -1.12595 | 0.17506  | -2.22866 |
| Au | -2.94552 | -2.24617 | -0.18194 |
| Cl | -4.93650 | -3.11681 | -0.82060 |
| C  | -0.96434 | 3.44321  | -1.66946 |
| H  | -0.60867 | 3.61562  | -0.65108 |
| H  | -0.41218 | 2.61149  | -2.10169 |
| H  | -0.70934 | 4.32972  | -2.25577 |
| C  | -0.72086 | 1.17155  | 2.86952  |
| H  | -0.15504 | 0.34807  | 2.43577  |
| H  | -0.45398 | 2.09994  | 2.35776  |
| H  | -0.38543 | 1.26249  | 3.90554  |
| C  | -6.89630 | 0.47563  | -0.99419 |
| H  | -6.59051 | 1.05466  | -1.86842 |
| H  | -6.40402 | -0.49859 | -1.04156 |
| H  | -7.97621 | 0.31800  | -1.06117 |
| Pb | 1.73725  | -1.50115 | -0.37462 |
| S  | -0.97291 | -1.37952 | 0.55991  |

### Coordination through P(sp<sup>2</sup>) atom

#### R= H

|    |          |          |          |
|----|----------|----------|----------|
| P  | 0.68557  | 0.07500  | 0.87784  |
| C  | 0.41465  | -0.33302 | -0.68271 |
| P  | -1.08390 | -0.32739 | -1.55340 |
| Pb | 1.82468  | -0.56723 | -2.64739 |
| Cl | 1.17171  | -2.96149 | -2.89655 |
| Au | -0.57097 | 0.73981  | 2.55412  |
| Cl | -1.82910 | 1.42606  | 4.29609  |
| Cl | -2.64384 | 0.56170  | -0.63561 |
| H  | 2.08176  | -0.04902 | 1.05383  |
| H  | -1.53746 | -1.65514 | -1.60741 |
| S  | -0.69892 | 0.43004  | -3.34178 |

#### R = Me

|    |          |          |          |
|----|----------|----------|----------|
| P  | 0.76845  | 0.17666  | 0.86028  |
| C  | 0.40447  | -0.22646 | -0.68127 |
| P  | -1.16812 | -0.28630 | -1.41817 |
| Pb | 1.69182  | -0.53123 | -2.70752 |
| Cl | 1.35004  | -3.01781 | -2.68955 |
| C  | -1.88950 | -1.91115 | -1.17902 |
| H  | -2.05991 | -2.08022 | -0.11458 |
| H  | -2.83133 | -1.96015 | -1.72718 |
| H  | -1.18228 | -2.64348 | -1.57666 |
| C  | 2.55081  | 0.05124  | 1.15378  |
| H  | 3.08453  | -0.31454 | 0.27730  |
| H  | 2.93205  | 1.03237  | 1.44691  |
| H  | 2.71324  | -0.62867 | 1.99362  |
| Au | -0.50574 | 0.79197  | 2.55196  |
| Cl | -1.77784 | 1.40012  | 4.31926  |
| Cl | -2.53036 | 0.95662  | -0.57114 |
| S  | -0.90059 | 0.17229  | -3.33890 |

#### R = t-Bu

|    |          |          |          |
|----|----------|----------|----------|
| P  | 0.72545  | 0.19242  | 0.83753  |
| C  | 0.45432  | -0.11506 | -0.75085 |
| P  | -1.12620 | -0.28354 | -1.48170 |
| Pb | 1.77076  | 0.12960  | -2.77886 |
| Cl | 2.37858  | -2.29605 | -3.01118 |
| Au | -0.71581 | 0.55653  | 2.48229  |
| Cl | -2.15772 | 0.91892  | 4.19256  |
| C  | 2.51248  | 0.18494  | 1.33111  |
| C  | 2.66473  | -1.00492 | 2.28677  |
| C  | 3.46696  | 0.03945  | 0.15877  |
| C  | 2.77806  | 1.48960  | 2.08543  |
| H  | 1.96623  | -0.94485 | 3.12490  |
| H  | 2.51112  | -1.95708 | 1.77384  |
| H  | 3.67960  | -0.99953 | 2.69585  |
| H  | 3.42347  | 0.90895  | -0.50383 |
| H  | 4.49229  | -0.01629 | 0.53695  |
| H  | 3.28199  | -0.87242 | -0.41469 |
| H  | 3.79850  | 1.47096  | 2.47944  |
| H  | 2.68214  | 2.36218  | 1.43474  |
| H  | 2.09467  | 1.61632  | 2.92829  |
| C  | -1.90348 | -1.94372 | -1.19348 |
| C  | -3.23579 | -1.97199 | -1.94086 |
| C  | -0.95722 | -2.99809 | -1.76584 |
| C  | -2.11983 | -2.17906 | 0.29709  |
| H  | -3.95197 | -1.25919 | -1.52974 |
| H  | -3.10663 | -1.76834 | -3.00547 |
| H  | -3.66024 | -2.97445 | -1.83899 |
| H  | 0.01629  | -2.99422 | -1.27376 |
| H  | -1.41269 | -3.98052 | -1.61256 |
| H  | -0.79163 | -2.86259 | -2.83515 |
| H  | -2.59353 | -3.15694 | 0.42143  |



|    |          |          |          |
|----|----------|----------|----------|
| H  | -1.17894 | -2.19943 | 0.84960  |
| H  | -2.77302 | -1.43146 | 0.74919  |
| Cl | -2.46568 | 1.02597  | -0.67480 |
| S  | -0.91145 | 0.11813  | -3.42592 |

**R = Ph**

|    |          |          |          |
|----|----------|----------|----------|
| P  | 0.74203  | 0.43860  | 0.43091  |
| C  | 0.55167  | -0.43352 | -0.94204 |
| P  | -0.90744 | -0.73189 | -1.83395 |
| Pb | 2.15713  | -1.17237 | -2.57073 |
| Cl | 2.13127  | -3.58195 | -1.85200 |
| Au | -0.68162 | 1.69207  | 1.56491  |
| Cl | -2.14122 | 2.95341  | 2.74854  |
| C  | 2.42545  | 0.29301  | 1.02165  |
| C  | 2.97155  | 1.35735  | 1.74059  |
| C  | 3.18298  | -0.86170 | 0.80363  |
| C  | 4.27674  | 1.28541  | 2.19817  |
| H  | 2.37188  | 2.24040  | 1.93595  |
| C  | 4.48354  | -0.92889 | 1.27388  |
| H  | 2.74194  | -1.72249 | 0.31007  |
| C  | 5.03287  | 0.14578  | 1.96179  |
| H  | 4.70182  | 2.11776  | 2.74645  |
| H  | 5.06424  | -1.82996 | 1.11467  |
| H  | 6.05097  | 0.08764  | 2.32935  |
| C  | -1.82840 | -2.08449 | -1.08483 |
| C  | -2.60987 | -1.86113 | 0.04860  |
| C  | -1.69077 | -3.36746 | -1.60494 |
| C  | -3.25856 | -2.92447 | 0.65025  |
| H  | -2.72036 | -0.86260 | 0.45573  |
| C  | -2.34461 | -4.42602 | -0.99325 |
| H  | -1.07141 | -3.53503 | -2.47737 |
| C  | -3.12673 | -4.20575 | 0.12949  |
| H  | -3.87134 | -2.75110 | 1.52692  |
| H  | -2.23755 | -5.42547 | -1.39758 |
| H  | -3.63796 | -5.03564 | 0.60389  |
| Cl | -2.19632 | 0.83853  | -1.75203 |
| S  | -0.36852 | -1.08458 | -3.71658 |

**R = Mes**

|    |          |          |          |
|----|----------|----------|----------|
| P  | 0.67340  | 0.61820  | 0.95879  |
| C  | 0.35685  | -0.35241 | -0.31999 |
| P  | -0.99954 | -0.54774 | -1.39060 |
| Pb | 2.14868  | -0.97271 | -1.79051 |
| Cl | 1.70473  | -3.44325 | -1.63972 |
| Au | -0.60153 | 1.97095  | 2.15792  |
| Cl | -1.87262 | 3.35691  | 3.42008  |
| C  | 2.43634  | 0.47729  | 1.33155  |
| C  | 3.27630  | 1.56895  | 1.05268  |
| C  | 2.94652  | -0.69346 | 1.91852  |
| C  | 4.62943  | 1.45349  | 1.33973  |
| C  | 4.30808  | -0.75339 | 2.18911  |
| C  | 5.16614  | 0.30130  | 1.90231  |
| H  | 5.28244  | 2.29328  | 1.12244  |
| H  | 4.70735  | -1.65198 | 2.64931  |
| C  | -1.86837 | -2.11232 | -1.09789 |
| C  | -2.29754 | -2.38617 | 0.22149  |
| C  | -2.12469 | -3.04971 | -2.12549 |
| C  | -2.92282 | -3.59647 | 0.48762  |
| C  | -2.75400 | -4.24072 | -1.78518 |
| C  | -3.14768 | -4.54781 | -0.49285 |
| H  | -3.25207 | -3.79066 | 1.50358  |
| H  | -2.94902 | -4.95572 | -2.57780 |
| Cl | -2.44873 | 0.88047  | -1.15752 |
| C  | 2.74512  | 2.84023  | 0.46062  |
| H  | 2.20691  | 2.66302  | -0.47532 |
| H  | 2.04366  | 3.33316  | 1.14096  |

|   |          |          |          |
|---|----------|----------|----------|
| H | 3.55589  | 3.53864  | 0.25225  |
| C | 2.07080  | -1.85824 | 2.27449  |
| H | 1.18542  | -1.53536 | 2.83024  |
| H | 1.72083  | -2.39317 | 1.38693  |
| H | 2.61544  | -2.56748 | 2.89816  |
| C | 6.63360  | 0.19381  | 2.17871  |
| H | 7.15996  | -0.21658 | 1.31121  |
| H | 7.07088  | 1.17000  | 2.39443  |
| H | 6.83211  | -0.46781 | 3.02334  |
| C | -2.13108 | -1.45965 | 1.38851  |
| H | -2.85821 | -1.70982 | 2.16145  |
| H | -1.13674 | -1.56230 | 1.82942  |
| H | -2.27374 | -0.40969 | 1.13796  |
| C | -1.78949 | -2.88133 | -3.57801 |
| H | -2.16124 | -1.94391 | -3.99037 |
| H | -0.71134 | -2.90490 | -3.74300 |
| H | -2.23589 | -3.70026 | -4.14275 |
| C | -3.78685 | -5.86092 | -0.17022 |
| H | -4.38399 | -6.22958 | -1.00602 |
| H | -3.02179 | -6.61438 | 0.04185  |
| H | -4.42835 | -5.78765 | 0.70932  |
| S | -0.14613 | -0.22407 | -3.16834 |

**R = Mes\***

|    |          |          |          |
|----|----------|----------|----------|
| P  | -0.85435 | 1.09617  | 0.13034  |
| C  | -0.25346 | -0.42114 | 0.29683  |
| P  | 1.34047  | -1.13304 | 0.30009  |
| Cl | -2.44120 | -2.37799 | -2.20365 |
| C  | 3.01605  | -0.43359 | 0.05643  |
| C  | 3.61940  | -0.68525 | -1.21380 |
| C  | 3.85915  | -0.13760 | 1.16267  |
| C  | 4.96192  | -1.02913 | -1.22342 |
| C  | 5.19793  | -0.50640 | 1.06098  |
| C  | 5.75450  | -1.05042 | -0.08352 |
| H  | 5.41394  | -1.27377 | -2.17615 |
| H  | 5.83122  | -0.33978 | 1.92060  |
| C  | -2.66874 | 0.92863  | 0.19602  |
| C  | -3.44349 | 0.96562  | -0.99213 |
| C  | -3.25622 | 0.49123  | 1.41177  |
| C  | -4.68589 | 0.33897  | -0.96654 |
| C  | -4.48559 | -0.15381 | 1.33578  |
| C  | -5.19598 | -0.29654 | 0.15342  |
| H  | -5.26313 | 0.31437  | -1.87527 |
| H  | -4.91577 | -0.54593 | 2.24788  |
| C  | -3.04195 | 1.72231  | -2.27237 |
| C  | -2.71502 | 0.75298  | 2.83469  |
| C  | -6.49766 | -1.09042 | 0.13203  |
| C  | 3.52711  | 0.73745  | 2.39232  |
| C  | 3.00313  | -0.41254 | -2.60351 |
| C  | 7.18891  | -1.55776 | -0.15191 |
| C  | -3.87645 | 1.24593  | 3.71785  |
| H  | -3.48350 | 1.53258  | 4.69626  |
| H  | -4.36348 | 2.11934  | 3.27831  |
| H  | -4.63688 | 0.48424  | 3.89007  |
| C  | -1.66287 | 1.85821  | 2.90142  |
| H  | -0.69522 | 1.56007  | 2.49506  |
| H  | -1.99141 | 2.76642  | 2.39067  |
| H  | -1.47729 | 2.11436  | 3.94790  |
| C  | -2.14596 | -0.52592 | 3.45500  |
| H  | -2.88637 | -1.32989 | 3.45337  |
| H  | -1.26066 | -0.86883 | 2.91650  |
| H  | -1.85433 | -0.34308 | 4.49325  |
| C  | -7.50363 | -0.46555 | 1.10544  |
| H  | -8.43783 | -1.03362 | 1.09462  |
| H  | -7.13072 | -0.46046 | 2.13175  |
| H  | -7.73015 | 0.56609  | 0.82524  |

|    |          |          |          |
|----|----------|----------|----------|
| C  | -7.13025 | -1.12815 | -1.25652 |
| H  | -8.04237 | -1.72872 | -1.22336 |
| H  | -7.40761 | -0.13025 | -1.60570 |
| H  | -6.46166 | -1.57998 | -1.99306 |
| C  | -6.19918 | -2.53243 | 0.56118  |
| H  | -5.49096 | -3.00235 | -0.12590 |
| H  | -5.77770 | -2.57561 | 1.56812  |
| H  | -7.11901 | -3.12367 | 0.55933  |
| C  | -4.10308 | 1.59878  | -3.37004 |
| H  | -5.07326 | 1.99256  | -3.05857 |
| H  | -3.77676 | 2.18624  | -4.23082 |
| H  | -4.22892 | 0.56620  | -3.70426 |
| C  | -2.93037 | 3.21378  | -1.92790 |
| H  | -3.88175 | 3.59563  | -1.54890 |
| H  | -2.16591 | 3.40958  | -1.17265 |
| H  | -2.66332 | 3.78535  | -2.82064 |
| C  | -1.73654 | 1.21940  | -2.89157 |
| H  | -0.85955 | 1.44627  | -2.28317 |
| H  | -1.76768 | 0.14261  | -3.06343 |
| H  | -1.57435 | 1.72491  | -3.84775 |
| C  | 2.10373  | 1.27544  | 2.45276  |
| H  | 1.81902  | 1.73739  | 1.50435  |
| H  | 1.36549  | 0.52506  | 2.72279  |
| H  | 2.05630  | 2.06039  | 3.21137  |
| C  | 4.42026  | 1.98917  | 2.24035  |
| H  | 4.22560  | 2.66992  | 3.07323  |
| H  | 5.48290  | 1.74551  | 2.24531  |
| H  | 4.19463  | 2.52059  | 1.31301  |
| C  | 3.87109  | 0.05783  | 3.72095  |
| H  | 4.92204  | -0.23131 | 3.77635  |
| H  | 3.68159  | 0.75493  | 4.54148  |
| H  | 3.26646  | -0.83328 | 3.88791  |
| C  | 1.57785  | 0.12427  | -2.58942 |
| H  | 1.33207  | 0.48799  | -3.59005 |
| H  | 0.83402  | -0.62923 | -2.33793 |
| H  | 1.48313  | 0.97432  | -1.90789 |
| C  | 3.07538  | -1.62572 | -3.53382 |
| H  | 2.45878  | -2.44496 | -3.16451 |
| H  | 2.70904  | -1.34396 | -4.52450 |
| H  | 4.09676  | -1.99228 | -3.65393 |
| C  | 3.85978  | 0.72236  | -3.20612 |
| H  | 3.83130  | 1.61292  | -2.57377 |
| H  | 4.90280  | 0.43365  | -3.33946 |
| H  | 3.45723  | 0.99067  | -4.18639 |
| C  | 7.88222  | -1.51710 | 1.20722  |
| H  | 7.98862  | -0.49597 | 1.58212  |
| H  | 7.34335  | -2.10513 | 1.95436  |
| H  | 8.88676  | -1.93670 | 1.11591  |
| C  | 7.99511  | -0.69774 | -1.13265 |
| H  | 7.58035  | -0.73398 | -2.14186 |
| H  | 8.01406  | 0.34728  | -0.81410 |
| H  | 9.02657  | -1.05692 | -1.18415 |
| C  | 7.17375  | -3.01040 | -0.64322 |
| H  | 6.61404  | -3.65006 | 0.04332  |
| H  | 6.71589  | -3.09876 | -1.63039 |
| H  | 8.19545  | -3.39381 | -0.71127 |
| Au | 0.26999  | 3.00142  | -0.16467 |
| Cl | 1.46591  | 4.91220  | -0.44327 |
| Pb | -1.47817 | -2.52928 | 0.12185  |
| Cl | 1.43782  | -1.89617 | 2.22690  |
| S  | 1.13025  | -2.79236 | -0.79429 |

### Coordination through $\pi(\text{C}=\text{P})$ bond

#### R = H

|    |          |          |          |
|----|----------|----------|----------|
| P  | 0.68291  | -0.00181 | 1.00197  |
| C  | 0.38199  | 0.08014  | -0.69485 |
| P  | -1.15377 | -0.21235 | -1.47027 |
| Pb | 1.62312  | -0.01380 | -2.81056 |
| Cl | 1.31045  | -2.49667 | -2.91934 |
| Au | 0.58793  | 2.12408  | -0.07253 |
| Cl | 0.77210  | 4.36437  | -0.04834 |
| Cl | -2.80326 | 0.32238  | -0.42245 |
| H  | -1.31787 | -1.60651 | -1.50512 |
| H  | 2.10928  | -0.07681 | 0.94500  |
| S  | -1.07734 | 0.60017  | -3.27187 |

#### R = Me

|    |          |          |          |
|----|----------|----------|----------|
| P  | 0.72839  | 0.17031  | 0.91650  |
| C  | 0.31221  | 0.19277  | -0.75316 |
| P  | -1.27341 | -0.17989 | -1.39377 |
| Pb | 1.46080  | 0.07964  | -2.91359 |
| Cl | 1.58162  | -2.43801 | -2.86772 |
| C  | -1.60582 | -1.92838 | -1.16042 |
| H  | -1.65916 | -2.15044 | -0.09340 |
| H  | -2.55388 | -2.16745 | -1.64361 |
| H  | -0.79273 | -2.48708 | -1.63126 |
| C  | 2.55034  | -0.04895 | 0.93321  |
| H  | 3.04123  | 0.24725  | 0.00642  |
| H  | 2.97204  | 0.51136  | 1.77019  |
| H  | 2.74033  | -1.11248 | 1.11273  |
| Au | 0.52099  | 2.26660  | -0.22162 |
| Cl | 0.69933  | 4.51084  | -0.22673 |
| Cl | -2.81241 | 0.70280  | -0.38923 |
| S  | -1.26790 | 0.36371  | -3.30755 |

#### R = *t*-Bu

|    |          |          |          |
|----|----------|----------|----------|
| P  | 0.59335  | 0.26567  | 0.76539  |
| C  | 0.32975  | 0.25049  | -0.93696 |
| P  | -1.21763 | -0.18855 | -1.65747 |
| Pb | 1.58159  | 0.59207  | -3.03604 |
| Cl | 2.48283  | -1.74360 | -3.33601 |
| Au | 0.34963  | 2.35272  | -0.38402 |
| Cl | 0.41590  | 4.60479  | -0.33370 |
| C  | 2.43077  | 0.15202  | 1.10638  |
| C  | 2.61619  | -1.30253 | 1.55793  |
| C  | 3.36456  | 0.45915  | -0.04914 |
| C  | 2.69407  | 1.09519  | 2.28105  |
| H  | 1.94804  | -1.56403 | 2.38352  |
| H  | 2.44678  | -2.00432 | 0.73728  |
| H  | 3.64360  | -1.44097 | 1.90917  |
| H  | 3.21958  | 1.47501  | -0.42808 |
| H  | 4.40315  | 0.38737  | 0.29079  |
| H  | 3.24993  | -0.26285 | -0.86225 |
| H  | 3.71241  | 0.94262  | 2.65152  |
| H  | 2.59485  | 2.14257  | 1.98596  |
| H  | 2.00654  | 0.91127  | 3.11148  |
| C  | -1.68245 | -1.96525 | -1.37382 |
| C  | -2.96503 | -2.23883 | -2.15916 |
| C  | -0.55102 | -2.84081 | -1.90715 |
| C  | -1.90539 | -2.23360 | 0.11121  |
| H  | -3.80586 | -1.64884 | -1.79123 |
| H  | -2.83558 | -2.04008 | -3.22420 |
| H  | -3.21608 | -3.29644 | -2.04034 |
| H  | 0.38747  | -2.68022 | -1.37530 |
| H  | -0.84056 | -3.88745 | -1.77622 |
| H  | -0.36384 | -2.67094 | -2.96771 |
| H  | -2.17108 | -3.28804 | 0.22854  |

|    |          |          |          |
|----|----------|----------|----------|
| H  | -1.00739 | -2.05292 | 0.70511  |
| H  | -2.71699 | -1.63312 | 0.52305  |
| Cl | -2.77910 | 0.82415  | -0.79802 |
| S  | -1.11855 | 0.27661  | -3.59372 |

**R = Ph**

|    |          |          |          |
|----|----------|----------|----------|
| P  | 0.67974  | 0.42885  | 0.85725  |
| C  | 0.16174  | 0.32061  | -0.78075 |
| P  | -1.45829 | -0.05346 | -1.32302 |
| Pb | 1.20718  | 0.31255  | -2.99948 |
| Cl | 1.42857  | -2.18769 | -3.24568 |
| Au | 0.41411  | 2.44123  | -0.41553 |
| Cl | 0.59061  | 4.67882  | -0.61870 |
| C  | -1.80584 | -1.79452 | -1.02598 |
| C  | -1.94148 | -2.66983 | -2.09634 |
| C  | -1.91138 | -2.26077 | 0.28444  |
| C  | -2.18823 | -4.01316 | -1.85474 |
| H  | -1.84530 | -2.30091 | -3.10965 |
| C  | -2.15492 | -3.60191 | 0.51597  |
| H  | -1.81328 | -1.57756 | 1.12103  |
| C  | -2.29405 | -4.47792 | -0.55421 |
| H  | -2.29068 | -4.69635 | -2.68928 |
| H  | -2.23938 | -3.96563 | 1.53323  |
| H  | -2.48481 | -5.52884 | -0.36902 |
| C  | 2.47812  | 0.19085  | 0.77641  |
| C  | 3.07506  | -0.72906 | -0.08774 |
| C  | 3.26990  | 0.88851  | 1.69107  |
| C  | 4.44813  | -0.91907 | -0.05708 |
| H  | 2.46740  | -1.32321 | -0.76331 |
| C  | 4.64251  | 0.70722  | 1.70529  |
| H  | 2.81012  | 1.58817  | 2.38204  |
| C  | 5.23252  | -0.19532 | 0.83020  |
| H  | 4.90315  | -1.64019 | -0.72640 |
| H  | 5.25358  | 1.26762  | 2.40327  |
| H  | 6.30625  | -0.34302 | 0.84845  |
| Cl | -2.89889 | 0.89313  | -0.22723 |
| S  | -1.56959 | 0.47596  | -3.23452 |

**R = Mes**

|    |          |          |          |
|----|----------|----------|----------|
| P  | 0.73478  | 0.44223  | 1.27528  |
| C  | 0.10278  | 0.27250  | -0.32355 |
| P  | -1.46203 | -0.03796 | -1.04649 |
| Pb | 1.38638  | 0.52021  | -2.40369 |
| Cl | 1.41419  | -1.88380 | -3.18538 |
| Au | 0.16511  | 2.41453  | 0.05321  |
| Cl | 0.11038  | 4.67403  | -0.06334 |
| C  | -1.84608 | -1.81272 | -1.06012 |
| C  | -2.13623 | -2.52645 | -2.24906 |
| C  | -1.85078 | -2.49359 | 0.17833  |
| C  | -2.34017 | -3.89674 | -2.15782 |
| C  | -2.06551 | -3.86638 | 0.19335  |
| C  | -2.28911 | -4.59480 | -0.96088 |
| H  | -2.55901 | -4.43803 | -3.07247 |
| H  | -2.06934 | -4.37392 | 1.15325  |
| C  | 2.53974  | 0.27092  | 1.00953  |
| C  | 3.05043  | -0.97361 | 0.58365  |
| C  | 3.42110  | 1.30666  | 1.36286  |
| C  | 4.42106  | -1.10402 | 0.40411  |
| C  | 4.78529  | 1.12152  | 1.16611  |
| C  | 5.30476  | -0.06217 | 0.66255  |
| H  | 4.81137  | -2.06215 | 0.07435  |
| H  | 5.46181  | 1.92959  | 1.42854  |
| Cl | -3.07093 | 0.79632  | -0.06032 |
| C  | 2.95177  | 2.60256  | 1.95356  |
| H  | 2.65160  | 3.32149  | 1.18531  |
| H  | 2.09061  | 2.46674  | 2.61308  |

|   |          |          |          |
|---|----------|----------|----------|
| H | 3.75066  | 3.06172  | 2.53803  |
| C | 2.18273  | -2.18702 | 0.40876  |
| H | 1.57453  | -2.36281 | 1.30153  |
| H | 1.50650  | -2.11463 | -0.44456 |
| H | 2.80189  | -3.07105 | 0.25493  |
| C | 6.77335  | -0.22252 | 0.42005  |
| H | 7.10487  | -1.23916 | 0.63984  |
| H | 7.01496  | -0.02228 | -0.62855 |
| H | 7.35635  | 0.47002  | 1.02910  |
| C | -1.65544 | -1.85777 | 1.52364  |
| H | -0.61807 | -1.95363 | 1.85601  |
| H | -1.91712 | -0.80427 | 1.56479  |
| H | -2.27367 | -2.37515 | 2.25937  |
| C | -2.47710 | -6.07817 | -0.92489 |
| H | -3.25123 | -6.39762 | -1.62534 |
| H | -1.55134 | -6.58678 | -1.21112 |
| H | -2.74958 | -6.42305 | 0.07350  |
| C | -2.27362 | -1.93611 | -3.62108 |
| H | -2.96875 | -1.09755 | -3.64649 |
| H | -1.31485 | -1.58209 | -4.00113 |
| H | -2.64291 | -2.70394 | -4.30157 |
| S | -1.33097 | 0.95629  | -2.77610 |

**R = Mes\***

|    |          |          |          |
|----|----------|----------|----------|
| P  | 0.64543  | 0.20898  | 1.14854  |
| C  | 0.38950  | 0.06861  | -0.56152 |
| P  | -1.08713 | -0.09066 | -1.56075 |
| Pb | 2.10879  | 0.52683  | -2.32226 |
| Cl | 3.01678  | -1.58429 | -3.42441 |
| Au | 0.49275  | 2.23234  | -0.17299 |
| Cl | 0.52481  | 4.48832  | -0.42055 |
| C  | 2.49029  | 0.06022  | 1.26052  |
| C  | 3.14547  | -1.10295 | 0.76509  |
| C  | 3.28369  | 1.16775  | 1.64493  |
| C  | 4.45146  | -0.97577 | 0.31411  |
| C  | 4.59748  | 1.21888  | 1.16932  |
| C  | 5.17774  | 0.20713  | 0.42579  |
| H  | 4.93337  | -1.84525 | -0.11282 |
| H  | 5.18473  | 2.09481  | 1.40512  |
| C  | 2.92770  | 2.25125  | 2.68506  |
| C  | 2.63549  | -2.54246 | 0.97173  |
| C  | 6.57074  | 0.31390  | -0.18435 |
| C  | 3.86145  | 1.98218  | 3.88291  |
| H  | 3.69064  | 0.98515  | 4.29718  |
| H  | 4.91396  | 2.05511  | 3.60606  |
| H  | 3.66654  | 2.71696  | 4.66880  |
| C  | 3.19178  | 3.66850  | 2.16809  |
| H  | 2.56153  | 3.91233  | 1.31194  |
| H  | 2.96976  | 4.38952  | 2.95954  |
| H  | 4.23339  | 3.81694  | 1.87897  |
| C  | 1.50971  | 2.20383  | 3.24561  |
| H  | 1.44574  | 2.89867  | 4.08735  |
| H  | 0.75427  | 2.52064  | 2.52424  |
| H  | 1.24491  | 1.21244  | 3.62101  |
| C  | 2.96769  | -3.46760 | -0.20154 |
| H  | 2.59026  | -3.07927 | -1.14668 |
| H  | 4.04159  | -3.62415 | -0.31351 |
| H  | 2.52192  | -4.45005 | -0.02471 |
| C  | 3.38954  | -3.04797 | 2.21778  |
| H  | 4.46989  | -3.01910 | 2.06580  |
| H  | 3.15544  | -2.43881 | 3.09466  |
| H  | 3.10020  | -4.08137 | 2.43050  |
| C  | 1.15029  | -2.68162 | 1.28118  |
| H  | 0.84128  | -2.06198 | 2.13122  |
| H  | 0.52189  | -2.44707 | 0.42427  |
| H  | 0.94442  | -3.71719 | 1.56611  |

|    |          |          |          |
|----|----------|----------|----------|
| C  | 7.23356  | 1.65515  | 0.11742  |
| H  | 6.64555  | 2.49405  | -0.26302 |
| H  | 7.39046  | 1.80169  | 1.18937  |
| H  | 8.21270  | 1.69348  | -0.36572 |
| C  | 6.45053  | 0.16336  | -1.70581 |
| H  | 7.44185  | 0.19170  | -2.16673 |
| H  | 5.97081  | -0.77572 | -1.98855 |
| H  | 5.85990  | 0.97880  | -2.13203 |
| C  | 7.47059  | -0.79923 | 0.36544  |
| H  | 7.55654  | -0.73305 | 1.45298  |
| H  | 7.09270  | -1.79228 | 0.11556  |
| H  | 8.47362  | -0.71210 | -0.06084 |
| C  | -2.32677 | -1.47324 | -1.65299 |
| C  | -2.30182 | -2.30477 | -2.81448 |
| C  | -3.55965 | -1.35816 | -0.95273 |
| C  | -3.50896 | -2.55935 | -3.44595 |
| C  | -1.10676 | -3.14636 | -3.30165 |
| C  | -4.72790 | -1.68009 | -1.63691 |
| C  | -3.73969 | -1.11224 | 0.55771  |
| C  | -4.73843 | -2.16866 | -2.93264 |
| H  | -3.48197 | -3.12249 | -4.37056 |
| C  | -0.65923 | -2.83335 | -4.73059 |
| C  | -1.58266 | -4.61554 | -3.27294 |
| C  | 0.06770  | -3.09300 | -2.34017 |
| H  | -5.66737 | -1.53893 | -1.12152 |
| C  | -2.45442 | -0.80483 | 1.30693  |
| C  | -4.24676 | -2.45892 | 1.11605  |
| C  | -4.77584 | -0.03405 | 0.88586  |
| C  | -6.01471 | -2.37910 | -3.73557 |
| H  | 0.06418  | -3.58518 | -5.05605 |
| H  | -1.50288 | -2.85684 | -5.42466 |
| H  | -0.18328 | -1.85822 | -4.80076 |
| H  | -2.34004 | -4.82837 | -4.02806 |
| H  | -0.72594 | -5.26483 | -3.47209 |
| H  | -1.99214 | -4.88135 | -2.29534 |
| H  | 0.50875  | -2.10311 | -2.25316 |
| H  | -0.23528 | -3.43970 | -1.34955 |
| H  | 0.86481  | -3.74512 | -2.70052 |
| H  | -1.67266 | -1.53065 | 1.07281  |
| H  | -2.08299 | 0.19856  | 1.11024  |
| H  | -2.63843 | -0.86247 | 2.38257  |
| H  | -4.37167 | -2.37652 | 2.19932  |
| H  | -5.20582 | -2.74787 | 0.68455  |
| H  | -3.53100 | -3.25984 | 0.91493  |
| H  | -5.75746 | -0.25891 | 0.46593  |
| H  | -4.89431 | 0.03219  | 1.97065  |
| H  | -4.46582 | 0.94455  | 0.52049  |
| C  | -7.25102 | -1.87062 | -2.99900 |
| C  | -6.20471 | -3.87245 | -4.02752 |
| C  | -5.89069 | -1.61450 | -5.05915 |
| H  | -7.43430 | -2.42585 | -2.07546 |
| H  | -7.16730 | -0.80917 | -2.75309 |
| H  | -8.13082 | -1.99603 | -3.63442 |
| H  | -5.37574 | -4.28255 | -4.60752 |
| H  | -6.28401 | -4.44635 | -3.10095 |
| H  | -7.12152 | -4.02700 | -4.60296 |
| H  | -5.76560 | -0.54367 | -4.88241 |
| H  | -5.03607 | -1.95817 | -5.64521 |
| H  | -6.79174 | -1.75866 | -5.66153 |
| Cl | -2.40696 | 1.45609  | -1.14480 |
| S  | -0.43732 | 0.35482  | -3.39961 |

**[R-P=C(Pb(II)Cl)-P(S)MeR](AuCl)**

**Coordination through Pb(II) atom**

**R = H**

|    |          |          |          |
|----|----------|----------|----------|
| P  | 0.85630  | 0.64014  | 0.55373  |
| C  | 0.41450  | 0.12878  | -0.96024 |
| P  | -1.25216 | -0.11359 | -1.49080 |
| Pb | 1.41507  | -0.00147 | -3.02438 |
| Cl | 1.22481  | -2.44876 | -3.17166 |
| C  | -2.51333 | 0.65878  | -0.46736 |
| H  | -3.49858 | 0.41644  | -0.86924 |
| H  | -2.43284 | 0.28585  | 0.55623  |
| H  | -2.36974 | 1.73957  | -0.48133 |
| Au | 3.18987  | 1.39802  | -4.29998 |
| Cl | 4.74142  | 2.66690  | -5.33465 |
| H  | 2.26486  | 0.75223  | 0.33830  |
| H  | -1.51415 | -1.49433 | -1.38813 |
| S  | -1.25679 | 0.50006  | -3.39456 |

**R = Me**

|    |          |          |          |
|----|----------|----------|----------|
| P  | 0.82398  | 0.29423  | 0.65593  |
| C  | 0.37355  | -0.05441 | -0.89769 |
| P  | -1.30842 | -0.20109 | -1.42025 |
| Pb | 1.37009  | -0.06773 | -2.96373 |
| Cl | 1.32766  | -2.52303 | -3.25852 |
| C  | -2.46132 | 0.78291  | -0.44498 |
| H  | -3.47117 | 0.64698  | -0.83637 |
| H  | -2.42692 | 0.46592  | 0.59960  |
| H  | -2.18284 | 1.83394  | -0.51915 |
| C  | -1.83390 | -1.91595 | -1.26354 |
| H  | -1.85136 | -2.20288 | -0.20993 |
| H  | -2.82744 | -2.02962 | -1.70120 |
| H  | -1.12203 | -2.54049 | -1.80643 |
| C  | 2.65332  | 0.39187  | 0.63281  |
| H  | 3.09165  | 0.25387  | -0.35590 |
| H  | 2.95857  | 1.36189  | 1.03469  |
| H  | 3.04470  | -0.37228 | 1.31084  |
| Au | 3.15936  | 1.39051  | -4.15192 |
| Cl | 4.74431  | 2.70589  | -5.07883 |
| S  | -1.26494 | 0.39221  | -3.34572 |

**R = t-Bu**

|    |          |          |          |
|----|----------|----------|----------|
| P  | 0.75755  | -0.07018 | 0.61755  |
| C  | 0.47016  | -0.12045 | -1.01401 |
| P  | -1.18969 | -0.32041 | -1.63050 |
| Pb | 1.55925  | 0.32601  | -2.99226 |
| Cl | 2.32487  | -1.96300 | -3.52234 |
| C  | -2.31647 | 0.81973  | -0.79378 |
| H  | -3.32312 | 0.72068  | -1.20142 |
| H  | -2.32406 | 0.62592  | 0.27981  |
| H  | -1.95766 | 1.83273  | -0.97664 |
| Au | 2.85480  | 2.38157  | -3.91731 |
| Cl | 3.97177  | 4.22151  | -4.61149 |
| C  | 2.58356  | 0.13647  | 0.96060  |
| C  | 2.96474  | -1.11185 | 1.76495  |
| C  | 3.48401  | 0.27499  | -0.25089 |
| C  | 2.69163  | 1.37429  | 1.85603  |
| H  | 2.31407  | -1.25325 | 2.63247  |
| H  | 2.92036  | -2.01528 | 1.15193  |
| H  | 3.99009  | -1.00462 | 2.13300  |
| H  | 3.27446  | 1.19008  | -0.81210 |
| H  | 4.52810  | 0.34274  | 0.07212  |
| H  | 3.41350  | -0.59118 | -0.91527 |
| H  | 3.71973  | 1.47261  | 2.21842  |

|   |          |          |          |
|---|----------|----------|----------|
| H | 2.43922  | 2.28875  | 1.31372  |
| H | 2.03671  | 1.30324  | 2.72886  |
| C | -1.85373 | -2.03683 | -1.39139 |
| C | -3.17194 | -2.14387 | -2.15866 |
| C | -0.84280 | -3.03034 | -1.95705 |
| C | -2.08482 | -2.30304 | 0.09421  |
| H | -3.93932 | -1.47265 | -1.76629 |
| H | -3.03679 | -1.93752 | -3.22182 |
| H | -3.54892 | -3.16558 | -2.05882 |
| H | 0.10842  | -2.99574 | -1.42398 |
| H | -1.25273 | -4.03946 | -1.85805 |
| H | -0.63991 | -2.84765 | -3.01327 |
| H | -2.41197 | -3.33978 | 0.21365  |
| H | -1.17428 | -2.17516 | 0.68382  |
| H | -2.86312 | -1.66331 | 0.51518  |
| S | -1.05935 | 0.14664  | -3.59158 |

**R = Ph**

|    |          |          |          |
|----|----------|----------|----------|
| P  | 0.78295  | 0.37194  | 0.66198  |
| C  | 0.36338  | -0.10789 | -0.86942 |
| P  | -1.29088 | -0.25723 | -1.46729 |
| Pb | 1.50582  | -0.18791 | -2.84371 |
| Cl | 1.63196  | -2.64640 | -3.07044 |
| C  | -2.43283 | 0.87465  | -0.64746 |
| H  | -3.42673 | 0.74789  | -1.07930 |
| H  | -2.47080 | 0.66203  | 0.42256  |
| H  | -2.08808 | 1.89637  | -0.80785 |
| Au | 3.24565  | 1.31116  | -4.05768 |
| Cl | 4.77889  | 2.64940  | -5.04265 |
| C  | 2.59166  | 0.32850  | 0.66344  |
| C  | 3.25891  | 1.31300  | 1.39479  |
| C  | 3.33511  | -0.65001 | -0.00383 |
| C  | 4.64382  | 1.35417  | 1.41048  |
| H  | 2.68960  | 2.06038  | 1.93862  |
| C  | 4.71936  | -0.61286 | 0.02674  |
| H  | 2.83122  | -1.46460 | -0.51609 |
| C  | 5.37363  | 0.39481  | 0.72334  |
| H  | 5.15491  | 2.13565  | 1.96054  |
| H  | 5.28889  | -1.37502 | -0.49211 |
| H  | 6.45685  | 0.42574  | 0.73796  |
| C  | -1.91443 | -1.92026 | -1.13730 |
| C  | -2.22989 | -2.77976 | -2.18220 |
| C  | -2.07166 | -2.33840 | 0.18393  |
| C  | -2.71579 | -4.04933 | -1.90603 |
| H  | -2.08366 | -2.45482 | -3.20552 |
| C  | -2.55736 | -3.60573 | 0.45270  |
| H  | -1.80044 | -1.68452 | 1.00673  |
| C  | -2.88157 | -4.46069 | -0.59328 |
| H  | -2.95703 | -4.71984 | -2.72227 |
| H  | -2.67699 | -3.93061 | 1.47961  |
| H  | -3.25730 | -5.45494 | -0.38057 |
| S  | -1.14224 | 0.14004  | -3.43133 |

**R = Mes**

|    |          |          |          |
|----|----------|----------|----------|
| P  | 0.89492  | 0.16027  | 1.20728  |
| C  | 0.35937  | -0.22148 | -0.31837 |
| P  | -1.28093 | -0.22234 | -1.00744 |
| Pb | 1.64663  | 0.00471  | -2.17315 |
| Cl | 1.57089  | -2.35466 | -2.94182 |
| Au | 3.66022  | 1.46351  | -2.93399 |
| Cl | 5.48054  | 2.72452  | -3.42904 |
| C  | 2.69819  | 0.24810  | 0.93277  |
| C  | 3.30356  | 1.51503  | 0.87467  |
| C  | 3.46432  | -0.91682 | 0.77021  |
| C  | 4.65825  | 1.59596  | 0.59092  |
| C  | 4.82130  | -0.78196 | 0.49227  |

|   |          |          |          |
|---|----------|----------|----------|
| C | 5.43295  | 0.45963  | 0.37829  |
| H | 5.12024  | 2.57502  | 0.51003  |
| H | 5.41694  | -1.67990 | 0.35816  |
| C | -1.97714 | -1.91097 | -1.07005 |
| C | -2.28620 | -2.58776 | -2.27474 |
| C | -2.19499 | -2.56765 | 0.16271  |
| C | -2.76770 | -3.88932 | -2.19678 |
| C | -2.66687 | -3.87438 | 0.16643  |
| C | -2.95356 | -4.56146 | -0.99946 |
| H | -3.00096 | -4.39913 | -3.12590 |
| H | -2.81670 | -4.36406 | 1.12385  |
| C | 2.50386  | 2.77140  | 1.05798  |
| H | 1.81698  | 2.69744  | 1.90698  |
| H | 3.15917  | 3.62613  | 1.22807  |
| H | 1.90028  | 2.99346  | 0.17197  |
| C | 2.86614  | -2.28891 | 0.89072  |
| H | 2.15904  | -2.34895 | 1.72301  |
| H | 2.32375  | -2.57995 | -0.01383 |
| H | 3.64785  | -3.03081 | 1.05868  |
| C | 6.87799  | 0.58818  | 0.01395  |
| H | 6.97563  | 1.04326  | -0.97649 |
| H | 7.40806  | 1.23222  | 0.71992  |
| H | 7.37404  | -0.38287 | -0.00525 |
| C | -2.00228 | -1.95185 | 1.51953  |
| H | -1.20611 | -1.21208 | 1.57090  |
| H | -2.92632 | -1.47487 | 1.86102  |
| H | -1.76088 | -2.72904 | 2.24575  |
| C | -2.15105 | -2.03015 | -3.66172 |
| H | -2.68604 | -1.08992 | -3.79041 |
| H | -1.10751 | -1.84927 | -3.92088 |
| H | -2.55469 | -2.74981 | -4.37445 |
| C | -3.42694 | -5.98026 | -0.97448 |
| H | -2.59281 | -6.66456 | -1.15760 |
| H | -3.86158 | -6.24026 | -0.00824 |
| H | -4.17255 | -6.16381 | -1.75043 |
| C | -2.45438 | 0.82093  | -0.10600 |
| H | -3.38942 | 0.83936  | -0.66911 |
| H | -2.64359 | 0.45981  | 0.90225  |
| H | -2.03732 | 1.82763  | -0.06941 |
| S | -0.91536 | 0.73058  | -2.75153 |

**R = Mes\***

|    |          |          |          |
|----|----------|----------|----------|
| P  | 0.12632  | 2.18114  | 1.03975  |
| C  | 0.48116  | 0.67365  | 0.43478  |
| P  | 2.00861  | -0.24587 | 0.34537  |
| Cl | -1.21391 | 0.41206  | -2.85851 |
| C  | 3.74489  | 0.35811  | 0.20227  |
| C  | 4.34999  | 0.34275  | -1.08844 |
| C  | 4.59838  | 0.29962  | 1.33757  |
| C  | 5.64597  | -0.14284 | -1.18518 |
| C  | 5.88964  | -0.18818 | 1.15625  |
| C  | 6.40612  | -0.51960 | -0.08592 |
| H  | 6.08504  | -0.21507 | -2.17240 |
| H  | 6.51890  | -0.29258 | 2.02939  |
| C  | -1.70272 | 2.24537  | 0.84193  |
| C  | -2.25917 | 3.02678  | -0.19793 |
| C  | -2.54865 | 1.42772  | 1.63727  |
| C  | -3.56682 | 2.75068  | -0.58879 |
| C  | -3.83830 | 1.19437  | 1.17272  |
| C  | -4.35187 | 1.78873  | 0.02706  |
| H  | -3.98385 | 3.30080  | -1.41656 |
| H  | -4.47958 | 0.53273  | 1.73813  |
| C  | -1.53250 | 4.22538  | -0.83918 |
| C  | -2.19067 | 0.89903  | 3.04643  |
| C  | -5.74963 | 1.42468  | -0.46253 |
| C  | 4.32164  | 0.92233  | 2.72379  |

|   |          |          |          |
|---|----------|----------|----------|
| C | 3.79270  | 1.00913  | -2.36239 |
| C | 7.77276  | -1.16463 | -0.27594 |
| C | -3.45481 | 0.83613  | 3.91885  |
| H | -3.16176 | 0.62815  | 4.95069  |
| H | -4.00379 | 1.78033  | 3.90432  |
| H | -4.13281 | 0.03653  | 3.61728  |
| C | -1.23531 | 1.84996  | 3.77033  |
| H | -0.23774 | 1.88960  | 3.31819  |
| H | -1.62889 | 2.86871  | 3.79730  |
| H | -1.08947 | 1.51012  | 4.79922  |
| C | -1.58965 | -0.50845 | 3.02530  |
| H | -2.25212 | -1.21455 | 2.51810  |
| H | -0.62233 | -0.52056 | 2.52415  |
| H | -1.44411 | -0.86581 | 4.04911  |
| C | -6.77835 | 1.74218  | 0.62941  |
| H | -7.78254 | 1.48336  | 0.28287  |
| H | -6.58916 | 1.17708  | 1.54417  |
| H | -6.76854 | 2.80595  | 0.88085  |
| C | -6.13782 | 2.19166  | -1.72395 |
| H | -7.13134 | 1.87401  | -2.04886 |
| H | -6.17839 | 3.27067  | -1.55216 |
| H | -5.44378 | 1.99705  | -2.54525 |
| C | -5.79073 | -0.07476 | -0.77982 |
| H | -5.07648 | -0.32752 | -1.56714 |
| H | -5.55524 | -0.68813 | 0.09201  |
| H | -6.78888 | -0.35837 | -1.12454 |
| C | -2.43249 | 4.97980  | -1.82093 |
| H | -3.35042 | 5.33826  | -1.34957 |
| H | -1.88994 | 5.85295  | -2.19039 |
| H | -2.69803 | 4.36925  | -2.68702 |
| C | -1.15507 | 5.21524  | 0.27267  |
| H | -2.04238 | 5.54317  | 0.81973  |
| H | -0.45651 | 4.78190  | 0.99191  |
| H | -0.67620 | 6.09747  | -0.16156 |
| C | -0.27825 | 3.82635  | -1.61729 |
| H | 0.51624  | 3.45853  | -0.96318 |
| H | -0.49140 | 3.04775  | -2.35075 |
| H | 0.12526  | 4.70168  | -2.13504 |
| C | 2.99441  | 1.66409  | 2.82852  |
| H | 2.88712  | 2.39490  | 2.02481  |
| H | 2.11484  | 1.02446  | 2.81846  |
| H | 2.96421  | 2.21222  | 3.77347  |
| C | 5.39609  | 2.01700  | 2.90480  |
| H | 5.21787  | 2.54455  | 3.84576  |
| H | 6.40605  | 1.60841  | 2.93625  |
| H | 5.35079  | 2.74546  | 2.09210  |
| C | 4.47457  | -0.07267 | 3.87818  |
| H | 5.46451  | -0.53256 | 3.88252  |
| H | 4.35196  | 0.44946  | 4.83077  |
| H | 3.74041  | -0.87735 | 3.84279  |
| C | 2.44831  | 1.69768  | -2.17444 |
| H | 2.24091  | 2.31727  | -3.05009 |
| H | 1.61603  | 1.00290  | -2.08581 |
| H | 2.46422  | 2.35632  | -1.30303 |
| C | 3.72361  | 0.06025  | -3.56089 |
| H | 2.99931  | -0.73576 | -3.39454 |
| H | 3.41632  | 0.62005  | -4.44807 |
| H | 4.69238  | -0.39470 | -3.77835 |
| C | 4.79290  | 2.13764  | -2.69452 |
| H | 4.88392  | 2.83963  | -1.86172 |
| H | 5.78891  | 1.75963  | -2.92792 |
| H | 4.43039  | 2.68926  | -3.56587 |
| C | 8.43810  | -1.51139 | 1.05323  |
| H | 8.65442  | -0.61999 | 1.64773  |
| H | 7.82012  | -2.18504 | 1.65222  |
| H | 9.38892  | -2.01485 | 0.86410  |

|    |          |          |          |
|----|----------|----------|----------|
| C  | 8.69447  | -0.20933 | -1.04347 |
| H  | 8.29947  | 0.03036  | -2.03254 |
| H  | 8.82958  | 0.72808  | -0.49836 |
| H  | 9.67750  | -0.66782 | -1.18078 |
| C  | 7.59795  | -2.45799 | -1.08120 |
| H  | 6.95549  | -3.16564 | -0.55178 |
| H  | 7.15069  | -2.26807 | -2.05879 |
| H  | 8.56898  | -2.93389 | -1.24246 |
| Au | -2.65514 | -2.57591 | -0.08806 |
| Cl | -4.20452 | -4.09478 | 0.57387  |
| Pb | -0.88005 | -0.77692 | -0.71190 |
| S  | 1.65340  | -1.54425 | -1.18190 |
| C  | 2.01090  | -1.36410 | 1.78058  |
| H  | 2.02722  | -0.86378 | 2.74331  |
| H  | 1.10282  | -1.96255 | 1.70004  |
| H  | 2.87008  | -2.02869 | 1.68299  |

#### Coordination through S atom

##### R= H

|    |          |          |          |
|----|----------|----------|----------|
| P  | 0.91170  | 0.24836  | 0.96279  |
| C  | 0.65282  | -0.10507 | -0.63681 |
| P  | -0.85325 | 0.23811  | -1.45726 |
| Pb | 1.98097  | -0.71173 | -2.53358 |
| Cl | 0.64164  | -2.78671 | -2.84352 |
| C  | -2.10843 | 1.21380  | -0.61881 |
| H  | -2.96774 | 1.32480  | -1.28305 |
| H  | -2.41236 | 0.70041  | 0.29633  |
| H  | -1.70252 | 2.19601  | -0.37545 |
| Au | -1.94121 | 0.75312  | -4.61362 |
| Cl | -3.70216 | 0.48076  | -5.99315 |
| H  | 2.28146  | -0.15982 | 1.06164  |
| H  | -1.45647 | -0.99607 | -1.75074 |
| S  | -0.19418 | 1.09684  | -3.19094 |

##### R = Me

|    |          |          |          |
|----|----------|----------|----------|
| P  | 0.86716  | 0.15174  | 0.96534  |
| C  | 0.62387  | -0.11567 | -0.65054 |
| P  | -0.94154 | 0.17343  | -1.38162 |
| Pb | 1.99349  | -0.48318 | -2.58417 |
| Cl | 1.20891  | -2.83302 | -2.91958 |
| C  | -2.03369 | 1.32392  | -0.52738 |
| H  | -2.94151 | 1.45393  | -1.12007 |
| H  | -2.28989 | 0.92633  | 0.45710  |
| H  | -1.53101 | 2.28430  | -0.41482 |
| C  | -1.84323 | -1.37072 | -1.54927 |
| H  | -2.08328 | -1.74165 | -0.54979 |
| H  | -2.75617 | -1.19688 | -2.12182 |
| H  | -1.21070 | -2.09319 | -2.06815 |
| C  | 2.62534  | -0.27763 | 1.27765  |
| H  | 3.17295  | -0.55983 | 0.37778  |
| H  | 3.11944  | 0.57054  | 1.75964  |
| H  | 2.65518  | -1.10911 | 1.98815  |
| Au | -2.12659 | 0.49286  | -4.61927 |
| Cl | -3.87534 | 0.10516  | -5.99009 |
| S  | -0.39783 | 0.94817  | -3.20640 |

##### R = t-Bu

|    |          |          |          |
|----|----------|----------|----------|
| P  | 0.86972  | -0.04154 | 0.81879  |
| C  | 0.65893  | -0.14041 | -0.82515 |
| P  | -0.97013 | 0.10983  | -1.45422 |
| Pb | 2.07449  | -0.05617 | -2.76175 |
| Cl | 2.14454  | -2.52169 | -3.20152 |
| C  | -1.91796 | 1.33441  | -0.52176 |
| H  | -2.82109 | 1.59405  | -1.07493 |
| H  | -2.18099 | 0.94806  | 0.46448  |

|    |          |          |          |
|----|----------|----------|----------|
| H  | -1.29588 | 2.22191  | -0.40724 |
| Au | -2.29520 | 0.72144  | -4.74108 |
| Cl | -4.02518 | 0.59389  | -6.18587 |
| S  | -0.54683 | 0.91833  | -3.29868 |
| C  | -1.99106 | -1.44771 | -1.50063 |
| C  | -3.44778 | -1.08387 | -1.78889 |
| C  | -1.45989 | -2.38923 | -2.57499 |
| C  | -1.89036 | -2.11403 | -0.12739 |
| H  | -3.90536 | -0.52090 | -0.97327 |
| H  | -3.56123 | -0.51998 | -2.71875 |
| H  | -4.01158 | -2.01320 | -1.90571 |
| H  | -0.40961 | -2.64422 | -2.42582 |
| H  | -2.04142 | -3.31476 | -2.53710 |
| H  | -1.57309 | -1.96535 | -3.57417 |
| H  | -2.57038 | -2.97039 | -0.11889 |
| H  | -0.88355 | -2.48044 | 0.07306  |
| H  | -2.18761 | -1.45269 | 0.69049  |
| C  | 2.68581  | -0.33573 | 1.19623  |
| C  | 3.11860  | -1.70937 | 0.69424  |
| C  | 3.54811  | 0.77046  | 0.59740  |
| C  | 2.79330  | -0.28572 | 2.72176  |
| H  | 2.52169  | -2.50641 | 1.14539  |
| H  | 3.02635  | -1.81295 | -0.38890 |
| H  | 4.16509  | -1.88768 | 0.96447  |
| H  | 3.21960  | 1.76366  | 0.91466  |
| H  | 4.58734  | 0.64414  | 0.91924  |
| H  | 3.54709  | 0.75494  | -0.49579 |
| H  | 3.82889  | -0.46176 | 3.02805  |
| H  | 2.48602  | 0.68597  | 3.11779  |
| H  | 2.17060  | -1.05014 | 3.19372  |

**R = Ph**

|    |          |          |          |
|----|----------|----------|----------|
| P  | 0.83316  | 0.50304  | 0.82893  |
| C  | 0.57693  | -0.11329 | -0.68961 |
| P  | -0.94574 | 0.01085  | -1.54160 |
| Cl | 2.17143  | -0.71269 | -2.34372 |
| Cl | 1.67507  | -3.16357 | -2.34260 |
| C  | -2.05531 | 1.31661  | -0.97891 |
| H  | -2.94032 | 1.32048  | -1.61773 |
| H  | -2.35075 | 1.14664  | 0.05769  |
| H  | -1.53753 | 2.27259  | -1.05976 |
| Au | -2.09011 | 0.22911  | -4.83966 |
| Cl | -3.85671 | 0.11325  | -6.24000 |
| C  | 2.56049  | 0.04566  | 1.16810  |
| C  | 3.11445  | -1.17388 | 0.76337  |
| C  | 3.35133  | 0.94378  | 1.88603  |
| C  | 4.44333  | -1.46377 | 1.03532  |
| H  | 2.48955  | -1.92051 | 0.28024  |
| C  | 4.68232  | 0.65577  | 2.14579  |
| H  | 2.92404  | 1.88020  | 2.23136  |
| C  | 5.23032  | -0.54527 | 1.71711  |
| H  | 4.85937  | -2.41576 | 0.72572  |
| H  | 5.29290  | 1.36818  | 2.68865  |
| H  | 6.26853  | -0.77336 | 1.92912  |
| C  | -1.84825 | -1.54154 | -1.38244 |
| C  | -2.44203 | -1.82974 | -0.15277 |
| C  | -1.93108 | -2.45463 | -2.42620 |
| C  | -3.13027 | -3.01735 | 0.01895  |
| H  | -2.36067 | -1.13741 | 0.67851  |
| C  | -2.62325 | -3.64245 | -2.24697 |
| H  | -1.45688 | -2.24132 | -3.37558 |
| C  | -3.22401 | -3.92232 | -1.03051 |
| H  | -3.59339 | -3.23780 | 0.97353  |
| H  | -2.68968 | -4.34899 | -3.06532 |
| H  | -3.76528 | -4.85160 | -0.89504 |
| S  | -0.30221 | 0.41206  | -3.43624 |

**R = Mes**

|    |          |          |          |
|----|----------|----------|----------|
| P  | 0.73072  | 0.16466  | 1.24070  |
| C  | 0.42645  | -0.22597 | -0.34213 |
| P  | -1.06808 | -0.07328 | -1.25701 |
| Pb | 2.25585  | -0.36755 | -1.82292 |
| Cl | 2.02248  | -2.82504 | -2.27702 |
| Au | -1.90540 | 1.49639  | -4.31531 |
| Cl | -3.54567 | 2.31207  | -5.63607 |
| C  | 2.55200  | -0.07853 | 1.31280  |
| C  | 3.09711  | -1.36678 | 1.45760  |
| C  | 3.39480  | 1.04713  | 1.28214  |
| C  | 4.48081  | -1.50122 | 1.51734  |
| C  | 4.76923  | 0.86071  | 1.34654  |
| C  | 5.33310  | -0.40614 | 1.45447  |
| H  | 4.90240  | -2.49562 | 1.62951  |
| H  | 5.41837  | 1.73111  | 1.31944  |
| C  | -1.94960 | -1.67122 | -1.33959 |
| C  | -2.56844 | -2.11693 | -0.14902 |
| C  | -2.02198 | -2.47964 | -2.49979 |
| C  | -3.25170 | -3.32678 | -0.14838 |
| C  | -2.73110 | -3.67277 | -2.42953 |
| C  | -3.35879 | -4.11840 | -1.27754 |
| H  | -3.71159 | -3.65625 | 0.77831  |
| H  | -2.78160 | -4.28374 | -3.32481 |
| C  | 2.83283  | 2.43432  | 1.17121  |
| H  | 2.38777  | 2.61521  | 0.18763  |
| H  | 2.04423  | 2.60829  | 1.90974  |
| H  | 3.61046  | 3.18298  | 1.32606  |
| C  | 2.22891  | -2.58547 | 1.56343  |
| H  | 1.38102  | -2.41607 | 2.23331  |
| H  | 1.82069  | -2.87370 | 0.59027  |
| H  | 2.80118  | -3.43064 | 1.94765  |
| C  | 6.81955  | -0.58428 | 1.49308  |
| H  | 7.22480  | -0.67241 | 0.48020  |
| H  | 7.31063  | 0.26717  | 1.96751  |
| H  | 7.09811  | -1.48918 | 2.03535  |
| C  | -2.56900 | -1.38055 | 1.16152  |
| H  | -1.66565 | -0.80122 | 1.34835  |
| H  | -3.42668 | -0.70553 | 1.23326  |
| H  | -2.66093 | -2.09635 | 1.97934  |
| C  | -1.39172 | -2.17619 | -3.82561 |
| H  | -1.80540 | -1.27563 | -4.28184 |
| H  | -0.31366 | -2.04304 | -3.74287 |
| H  | -1.57279 | -3.00802 | -4.50618 |
| C  | -4.12606 | -5.40247 | -1.26381 |
| H  | -4.30901 | -5.74808 | -0.24552 |
| H  | -5.09701 | -5.27493 | -1.75194 |
| H  | -3.59322 | -6.18717 | -1.80476 |
| S  | -0.24741 | 0.70956  | -2.95963 |
| C  | -2.22797 | 1.18979  | -0.67489 |
| H  | -1.71538 | 2.14931  | -0.74723 |
| H  | -3.09186 | 1.19745  | -1.34239 |
| H  | -2.54959 | 1.01928  | 0.34913  |

**R = Mes\***

|   |          |          |          |
|---|----------|----------|----------|
| P | -1.76371 | 2.14815  | 0.27786  |
| C | -0.88200 | 0.74254  | 0.27600  |
| P | 0.85874  | 0.49828  | 0.35793  |
| C | -3.49077 | 1.48472  | 0.32616  |
| C | -4.28181 | 1.53134  | -0.85183 |
| C | -3.97680 | 0.79387  | 1.46044  |
| C | -5.36199 | 0.66545  | -0.94148 |
| C | -5.05828 | -0.07380 | 1.28362  |
| C | -5.72689 | -0.20563 | 0.07899  |
| H | -5.94027 | 0.65210  | -1.85337 |

|   |          |          |          |
|---|----------|----------|----------|
| H | -5.40167 | -0.64696 | 2.13216  |
| C | -3.49597 | 1.01959  | 2.91317  |
| C | -4.04860 | 2.54741  | -1.98630 |
| C | -6.86545 | -1.19726 | -0.13568 |
| C | -2.74335 | 2.30237  | -2.74547 |
| H | -1.86295 | 2.49885  | -2.13001 |
| H | -2.67524 | 1.27315  | -3.10076 |
| H | -2.68668 | 2.97975  | -3.60280 |
| C | -4.04561 | 3.96207  | -1.38963 |
| H | -4.98722 | 4.16968  | -0.87508 |
| H | -3.23096 | 4.11040  | -0.67780 |
| H | -3.92316 | 4.70017  | -2.18722 |
| C | -5.17265 | 2.50761  | -3.02461 |
| H | -5.19555 | 1.56156  | -3.57047 |
| H | -6.15482 | 2.68035  | -2.57798 |
| H | -4.99914 | 3.30017  | -3.75592 |
| C | -2.50199 | -0.05001 | 3.37252  |
| H | -1.57110 | 0.00915  | 2.80804  |
| H | -2.26309 | 0.08675  | 4.43140  |
| H | -2.92034 | -1.05325 | 3.25442  |
| C | -2.87956 | 2.40488  | 3.11106  |
| H | -1.92552 | 2.53274  | 2.59177  |
| H | -3.55481 | 3.19366  | 2.77170  |
| H | -2.67517 | 2.56491  | 4.17319  |
| C | -4.70282 | 0.96929  | 3.86649  |
| H | -5.50134 | 1.63727  | 3.53621  |
| H | -5.11805 | -0.03362 | 3.97307  |
| H | -4.38318 | 1.28686  | 4.86197  |
| C | -7.10220 | -2.08067 | 1.08631  |
| H | -7.41118 | -1.49933 | 1.95904  |
| H | -7.90041 | -2.79455 | 0.87013  |
| H | -6.21017 | -2.65436 | 1.35125  |
| C | -6.52317 | -2.10224 | -1.32528 |
| H | -6.37950 | -1.52955 | -2.24310 |
| H | -5.60338 | -2.66292 | -1.14387 |
| H | -7.33268 | -2.81703 | -1.49739 |
| C | -8.16108 | -0.43391 | -0.43556 |
| H | -8.06997 | 0.18181  | -1.33249 |
| H | -8.98283 | -1.13719 | -0.59658 |
| H | -8.43159 | 0.22122  | 0.39640  |
| C | 2.28536  | 1.54062  | -0.14347 |
| C | 2.89369  | 1.26956  | -1.39770 |
| C | 3.08425  | 2.14468  | 0.87188  |
| C | 4.28375  | 1.20229  | -1.44056 |
| C | 4.46000  | 2.04202  | 0.75361  |
| C | 5.08882  | 1.46453  | -0.34557 |
| H | 4.74620  | 0.92342  | -2.37708 |
| H | 5.07404  | 2.44562  | 1.54946  |
| C | 2.18007  | 1.23891  | -2.76263 |
| C | 2.49749  | -0.00713 | -3.59267 |
| C | 2.72812  | 2.47188  | -3.51403 |
| H | 2.10491  | -0.90907 | -3.12537 |
| H | 2.03740  | 0.09106  | -4.57944 |
| H | 3.57050  | -0.13951 | -3.74241 |
| H | 2.52401  | 3.39189  | -2.96035 |
| H | 3.80396  | 2.40954  | -3.68151 |
| H | 2.23730  | 2.54422  | -4.48830 |
| C | 2.57080  | 3.08863  | 1.98056  |
| C | 3.22938  | 4.45564  | 1.69803  |
| C | 2.98764  | 2.65374  | 3.38850  |
| H | 2.98615  | 4.80483  | 0.69202  |
| H | 2.85639  | 5.19239  | 2.41495  |
| H | 4.31498  | 4.41901  | 1.78878  |
| H | 2.54004  | 1.70616  | 3.68720  |
| H | 4.07049  | 2.54319  | 3.46895  |
| H | 2.68004  | 3.41225  | 4.11339  |

|    |          |          |          |
|----|----------|----------|----------|
| C  | 6.59339  | 1.23578  | -0.34170 |
| C  | 7.31971  | 2.58073  | -0.21954 |
| C  | 7.07084  | 0.53782  | -1.61224 |
| H  | 7.05587  | 3.10356  | 0.70242  |
| H  | 8.40118  | 2.42031  | -0.21149 |
| H  | 7.07953  | 3.23650  | -1.06041 |
| H  | 6.57337  | -0.42475 | -1.75187 |
| H  | 6.90765  | 1.14948  | -2.50367 |
| H  | 8.14422  | 0.34835  | -1.53981 |
| Cl | -2.36638 | -1.41904 | -2.34519 |
| Au | 2.89939  | -2.31662 | 0.16995  |
| Cl | 4.80257  | -3.28346 | 0.92914  |
| C  | 1.07098  | 3.35829  | 1.92814  |
| H  | 0.76334  | 3.69676  | 0.93675  |
| H  | 0.45056  | 2.50549  | 2.19555  |
| H  | 0.82501  | 4.15267  | 2.63733  |
| C  | 0.67148  | 1.43517  | -2.69504 |
| H  | 0.13209  | 0.56454  | -2.32436 |
| H  | 0.41482  | 2.30309  | -2.08280 |
| H  | 0.29437  | 1.62211  | -3.70342 |
| C  | 6.95052  | 0.34851  | 0.85794  |
| H  | 6.67343  | 0.81906  | 1.80402  |
| H  | 6.44528  | -0.61873 | 0.80183  |
| H  | 8.02928  | 0.17109  | 0.87862  |
| Pb | -1.71288 | -1.50255 | 0.07826  |
| S  | 1.03134  | -1.30644 | -0.66203 |
| C  | 1.19474  | -0.00298 | 2.07420  |
| H  | 2.25426  | -0.24155 | 2.17097  |
| H  | 0.90162  | 0.75180  | 2.79843  |
| H  | 0.62159  | -0.91335 | 2.25175  |

#### Coordination through P(sp<sup>2</sup>) atom

##### R= H

|    |          |          |          |
|----|----------|----------|----------|
| P  | 0.75718  | 0.09420  | 0.83287  |
| C  | 0.48732  | -0.28988 | -0.73305 |
| P  | -1.02087 | -0.13508 | -1.61567 |
| Pb | 1.89471  | -0.71218 | -2.65428 |
| Cl | 0.97899  | -3.03265 | -2.83156 |
| C  | -2.32983 | 0.84599  | -0.86911 |
| H  | -3.19280 | 0.83465  | -1.53802 |
| H  | -2.60971 | 0.42598  | 0.09953  |
| H  | -1.98548 | 1.87239  | -0.73948 |
| Au | -0.52453 | 0.84010  | 2.46611  |
| Cl | -1.86223 | 1.60882  | 4.11644  |
| H  | 2.13550  | -0.11927 | 1.05756  |
| H  | -1.54616 | -1.44046 | -1.67387 |
| S  | -0.48176 | 0.52103  | -3.42556 |

##### R = Me

|    |          |          |          |
|----|----------|----------|----------|
| P  | 0.80617  | 0.17056  | 0.78812  |
| C  | 0.46042  | -0.18271 | -0.76762 |
| P  | -1.14381 | -0.21203 | -1.48928 |
| Pb | 1.74416  | -0.62114 | -2.76015 |
| Cl | 1.39102  | -3.10101 | -2.52252 |
| C  | -2.28180 | 1.03953  | -0.86777 |
| H  | -3.21644 | 0.96636  | -1.42776 |
| H  | -2.47639 | 0.88650  | 0.19614  |
| H  | -1.84754 | 2.02714  | -1.02303 |
| C  | -1.89032 | -1.81097 | -1.13366 |
| H  | -2.06898 | -1.90354 | -0.06008 |
| H  | -2.83168 | -1.89384 | -1.68018 |
| H  | -1.20145 | -2.58918 | -1.46764 |
| C  | 2.58305  | 0.05881  | 1.11958  |
| H  | 3.13771  | -0.23851 | 0.23002  |



|    |          |          |          |
|----|----------|----------|----------|
| H  | 2.94143  | 1.02497  | 1.48205  |
| H  | 2.74262  | -0.67380 | 1.91432  |
| Au | -0.53742 | 0.71651  | 2.46035  |
| Cl | -1.94807 | 1.26301  | 4.14493  |
| S  | -0.82784 | 0.03906  | -3.46053 |

**R = t-Bu**

|    |          |          |          |
|----|----------|----------|----------|
| P  | 0.74025  | 0.17411  | 0.81752  |
| C  | 0.47854  | -0.11919 | -0.77291 |
| P  | -1.12410 | -0.24991 | -1.51087 |
| Pb | 1.82239  | 0.07084  | -2.78429 |
| Cl | 2.43806  | -2.36620 | -2.92968 |
| C  | -2.27890 | 0.99234  | -0.88541 |
| H  | -3.19265 | 0.96195  | -1.47996 |
| H  | -2.50963 | 0.83099  | 0.16898  |
| H  | -1.81298 | 1.97061  | -1.00588 |
| Au | -0.73899 | 0.53616  | 2.43992  |
| Cl | -2.27507 | 0.92651  | 4.06386  |
| C  | 2.51954  | 0.19166  | 1.34134  |
| C  | 2.67483  | -0.98619 | 2.31040  |
| C  | 3.48858  | 0.04562  | 0.18115  |
| C  | 2.76013  | 1.50677  | 2.08511  |
| H  | 1.96532  | -0.92640 | 3.13935  |
| H  | 2.53776  | -1.94479 | 1.80489  |
| H  | 3.68444  | -0.96586 | 2.73188  |
| H  | 3.44093  | 0.90637  | -0.49215 |
| H  | 4.51032  | 0.00585  | 0.57116  |
| H  | 3.31968  | -0.87406 | -0.38470 |
| H  | 3.77410  | 1.50349  | 2.49607  |
| H  | 2.66611  | 2.37079  | 1.42279  |
| H  | 2.06214  | 1.63623  | 2.91571  |
| C  | -1.88765 | -1.92006 | -1.22553 |
| C  | -3.22383 | -1.94514 | -1.96979 |
| C  | -0.95779 | -2.98814 | -1.79289 |
| C  | -2.11154 | -2.15968 | 0.26434  |
| H  | -3.95519 | -1.26174 | -1.53326 |
| H  | -3.10223 | -1.70536 | -3.02818 |
| H  | -3.63714 | -2.95517 | -1.90088 |
| H  | 0.01632  | -2.99139 | -1.30174 |
| H  | -1.42047 | -3.96745 | -1.64005 |
| H  | -0.78889 | -2.85313 | -2.86190 |
| H  | -2.58451 | -3.13829 | 0.38795  |
| H  | -1.17373 | -2.17856 | 0.82176  |
| H  | -2.77061 | -1.41969 | 0.72258  |
| S  | -0.83148 | 0.07077  | -3.48191 |

**R = Ph**

|    |          |          |          |
|----|----------|----------|----------|
| P  | 0.74735  | 0.39098  | 0.56981  |
| C  | 0.53343  | -0.35643 | -0.86909 |
| P  | -0.98526 | -0.57674 | -1.72618 |
| Pb | 2.07793  | -1.01663 | -2.58150 |
| Cl | 2.09301  | -3.44872 | -1.92452 |
| C  | -2.10176 | 0.83577  | -1.61552 |
| H  | -2.99064 | 0.61980  | -2.21089 |
| H  | -2.38863 | 1.03732  | -0.58194 |
| H  | -1.59179 | 1.70800  | -2.02533 |
| Au | -0.70776 | 1.47999  | 1.84043  |
| Cl | -2.24930 | 2.56564  | 3.09771  |
| C  | 2.45103  | 0.26770  | 1.10859  |
| C  | 2.98340  | 1.29734  | 1.88526  |
| C  | 3.23686  | -0.84344 | 0.79102  |
| C  | 4.30242  | 1.23716  | 2.30334  |
| H  | 2.36271  | 2.14499  | 2.15709  |
| C  | 4.55183  | -0.89968 | 1.22175  |
| H  | 2.80901  | -1.68148 | 0.24893  |
| C  | 5.08679  | 0.14205  | 1.96870  |

|   |          |          |          |
|---|----------|----------|----------|
| H | 4.71663  | 2.04334  | 2.89726  |
| H | 5.15553  | -1.76791 | 0.98458  |
| H | 6.11609  | 0.09225  | 2.30502  |
| C | -1.85913 | -1.98629 | -1.01025 |
| C | -2.56190 | -1.83167 | 0.18515  |
| C | -1.79714 | -3.23159 | -1.62559 |
| C | -3.20890 | -2.91757 | 0.74917  |
| H | -2.60331 | -0.87167 | 0.68849  |
| C | -2.44508 | -4.31538 | -1.05278 |
| H | -1.23731 | -3.34779 | -2.54581 |
| C | -3.15151 | -4.15914 | 0.12956  |
| H | -3.75685 | -2.79317 | 1.67576  |
| H | -2.39201 | -5.28536 | -1.53284 |
| H | -3.65763 | -5.00819 | 0.57468  |
| S | -0.46829 | -0.89558 | -3.64185 |

**R = Mes**

|    |          |          |          |
|----|----------|----------|----------|
| P  | 0.72674  | 0.58618  | 0.93302  |
| C  | 0.42157  | -0.42753 | -0.31504 |
| P  | -0.97773 | -0.57477 | -1.37535 |
| Pb | 2.19508  | -1.11751 | -1.76093 |
| Cl | 1.64731  | -3.56963 | -1.57751 |
| Au | -0.60250 | 1.96865  | 2.04899  |
| Cl | -1.98004 | 3.37636  | 3.17328  |
| C  | 2.48657  | 0.48978  | 1.33493  |
| C  | 3.31640  | 1.57866  | 1.01860  |
| C  | 3.00531  | -0.64671 | 1.97800  |
| C  | 4.66660  | 1.49605  | 1.32953  |
| C  | 4.36373  | -0.67610 | 2.26907  |
| C  | 5.21117  | 0.37736  | 1.94913  |
| H  | 5.31117  | 2.33460  | 1.08387  |
| H  | 4.76896  | -1.54893 | 2.77178  |
| C  | -1.85127 | -2.15592 | -1.10560 |
| C  | -2.25118 | -2.46613 | 0.21285  |
| C  | -2.18306 | -3.04371 | -2.15402 |
| C  | -2.93523 | -3.65089 | 0.45541  |
| C  | -2.86686 | -4.21267 | -1.84192 |
| C  | -3.24269 | -4.54873 | -0.55153 |
| H  | -3.23841 | -3.86961 | 1.47466  |
| H  | -3.11777 | -4.88680 | -2.65466 |
| C  | 2.77800  | 2.81239  | 0.35763  |
| H  | 2.27895  | 2.58209  | -0.58847 |
| H  | 2.04131  | 3.31571  | 0.99145  |
| H  | 3.57981  | 3.52090  | 0.14852  |
| C  | 2.14155  | -1.80896 | 2.36971  |
| H  | 1.24909  | -1.47680 | 2.90846  |
| H  | 1.80247  | -2.37795 | 1.49924  |
| H  | 2.69052  | -2.48973 | 3.02078  |
| C  | 6.67614  | 0.30314  | 2.24916  |
| H  | 7.22239  | -0.11964 | 1.40011  |
| H  | 7.09307  | 1.29232  | 2.44558  |
| H  | 6.87386  | -0.33267 | 3.11357  |
| C  | -1.97671 | -1.61403 | 1.41725  |
| H  | -2.68576 | -1.85617 | 2.20949  |
| H  | -0.97243 | -1.80247 | 1.80355  |
| H  | -2.05058 | -0.54243 | 1.23824  |
| C  | -1.86598 | -2.84324 | -3.60741 |
| H  | -2.18724 | -1.87229 | -3.98358 |
| H  | -0.79377 | -2.91903 | -3.79282 |
| H  | -2.36791 | -3.61485 | -4.19220 |
| C  | -3.94332 | -5.83802 | -0.25964 |
| H  | -4.60716 | -6.12469 | -1.07731 |
| H  | -3.21687 | -6.64641 | -0.13089 |
| H  | -4.53093 | -5.77475 | 0.65756  |
| C  | -2.23475 | 0.71789  | -1.22002 |
| H  | -2.80333 | 0.63517  | -0.29439 |

|   |          |          |          |
|---|----------|----------|----------|
| H | -1.74845 | 1.69247  | -1.27244 |
| H | -2.91526 | 0.60925  | -2.06742 |
| S | -0.05475 | -0.29251 | -3.14914 |

**R = Mes\***

|    |          |          |          |
|----|----------|----------|----------|
| P  | -0.84475 | 1.09382  | 0.09400  |
| C  | -0.20042 | -0.37871 | 0.41048  |
| P  | 1.41168  | -1.06356 | 0.61741  |
| Cl | -2.12530 | -2.61148 | -2.08067 |
| C  | 3.07844  | -0.42702 | 0.14677  |
| C  | 3.63505  | -0.89056 | -1.08142 |
| C  | 3.97259  | 0.02424  | 1.15654  |
| C  | 4.97439  | -1.25196 | -1.08634 |
| C  | 5.30113  | -0.38589 | 1.07771  |
| C  | 5.80950  | -1.11096 | 0.01337  |
| H  | 5.38512  | -1.65452 | -2.00366 |
| H  | 5.96639  | -0.10018 | 1.88051  |
| C  | -2.65740 | 0.87193  | 0.14150  |
| C  | -3.40742 | 0.76616  | -1.05888 |
| C  | -3.25932 | 0.53754  | 1.38240  |
| C  | -4.62553 | 0.09548  | -0.99674 |
| C  | -4.46638 | -0.15280 | 1.34737  |
| C  | -5.14214 | -0.44065 | 0.17150  |
| H  | -5.17874 | -0.04161 | -1.91036 |
| H  | -4.90514 | -0.46799 | 2.28488  |
| C  | -3.01530 | 1.42663  | -2.39480 |
| C  | -2.75975 | 0.94691  | 2.78682  |
| C  | -6.41964 | -1.27300 | 0.20431  |
| C  | 3.68668  | 1.09094  | 2.23742  |
| C  | 2.96231  | -0.84861 | -2.46881 |
| C  | 7.23449  | -1.64814 | -0.02532 |
| C  | -3.95394 | 1.49688  | 3.58943  |
| H  | -3.59564 | 1.87386  | 4.55041  |
| H  | -4.43666 | 2.32148  | 3.06014  |
| H  | -4.71112 | 0.74296  | 3.80389  |
| C  | -1.72821 | 2.07434  | 2.78426  |
| H  | -0.74073 | 1.75758  | 2.44693  |
| H  | -2.04770 | 2.92011  | 2.17105  |
| H  | -1.59509 | 2.43870  | 3.80640  |
| C  | -2.18559 | -0.25727 | 3.53815  |
| H  | -2.91179 | -1.07143 | 3.59973  |
| H  | -1.28885 | -0.63329 | 3.04204  |
| H  | -1.91386 | 0.02822  | 4.55860  |
| C  | -7.46935 | -0.57554 | 1.07721  |
| H  | -8.38758 | -1.16857 | 1.10560  |
| H  | -7.12531 | -0.44702 | 2.10561  |
| H  | -7.71487 | 0.41216  | 0.67944  |
| C  | -7.01146 | -1.48109 | -1.18722 |
| H  | -7.90489 | -2.10548 | -1.11174 |
| H  | -7.31008 | -0.53657 | -1.64902 |
| H  | -6.30876 | -1.98579 | -1.85446 |
| C  | -6.09724 | -2.65013 | 0.79743  |
| H  | -5.36121 | -3.17503 | 0.18324  |
| H  | -5.70006 | -2.57139 | 1.81198  |
| H  | -7.00215 | -3.26247 | 0.84037  |
| C  | -4.03962 | 1.14367  | -3.49810 |
| H  | -5.03728 | 1.51080  | -3.24656 |
| H  | -3.72216 | 1.66588  | -4.40308 |
| H  | -4.10124 | 0.07902  | -3.73605 |
| C  | -2.99961 | 2.94654  | -2.17948 |
| H  | -3.97934 | 3.30169  | -1.84967 |
| H  | -2.26281 | 3.25117  | -1.43271 |
| H  | -2.74846 | 3.45398  | -3.11462 |
| C  | -1.66755 | 0.95541  | -2.94328 |
| H  | -0.82052 | 1.28853  | -2.34173 |
| H  | -1.62913 | -0.13154 | -3.02237 |

|    |          |          |          |
|----|----------|----------|----------|
| H  | -1.51474 | 1.38686  | -3.93661 |
| C  | 2.31908  | 1.75306  | 2.11853  |
| H  | 2.20329  | 2.21344  | 1.13533  |
| H  | 1.46927  | 1.09407  | 2.27701  |
| H  | 2.24018  | 2.55312  | 2.85849  |
| C  | 4.68506  | 2.24030  | 1.97319  |
| H  | 4.46497  | 3.06786  | 2.65269  |
| H  | 5.72055  | 1.94150  | 2.13647  |
| H  | 4.59167  | 2.61141  | 0.95069  |
| C  | 3.93564  | 0.58956  | 3.66391  |
| H  | 4.94903  | 0.19892  | 3.77658  |
| H  | 3.82432  | 1.41966  | 4.36657  |
| H  | 3.24587  | -0.19727 | 3.96700  |
| C  | 1.53588  | -0.31820 | -2.47507 |
| H  | 1.23606  | -0.13179 | -3.50905 |
| H  | 0.81564  | -1.02308 | -2.06328 |
| H  | 1.46535  | 0.63269  | -1.94048 |
| C  | 2.99939  | -2.19790 | -3.19066 |
| H  | 2.40185  | -2.94184 | -2.66458 |
| H  | 2.58864  | -2.08029 | -4.19691 |
| H  | 4.01624  | -2.58204 | -3.29448 |
| C  | 3.78728  | 0.16948  | -3.28494 |
| H  | 3.78220  | 1.15183  | -2.80642 |
| H  | 4.82533  | -0.13996 | -3.41262 |
| H  | 3.34284  | 0.27441  | -4.27819 |
| C  | 7.97949  | -1.40650 | 1.28476  |
| H  | 8.10986  | -0.34106 | 1.49085  |
| H  | 7.46375  | -1.86211 | 2.13392  |
| H  | 8.97570  | -1.85095 | 1.22467  |
| C  | 8.01318  | -0.96681 | -1.15699 |
| H  | 7.55903  | -1.15272 | -2.13215 |
| H  | 8.05683  | 0.11465  | -1.00713 |
| H  | 9.03758  | -1.34796 | -1.18910 |
| C  | 7.18517  | -3.15927 | -0.28114 |
| H  | 6.64648  | -3.67436 | 0.51789  |
| H  | 6.68691  | -3.39325 | -1.22386 |
| H  | 8.19914  | -3.56599 | -0.32658 |
| Au | 0.17041  | 3.03199  | -0.34479 |
| Cl | 1.23666  | 4.99539  | -0.76720 |
| Pb | -1.43076 | -2.49094 | 0.34192  |
| S  | 1.22460  | -2.92095 | -0.18593 |
| C  | 1.50976  | -1.45199 | 2.39539  |
| H  | 2.44404  | -1.98767 | 2.56632  |
| H  | 1.43451  | -0.59662 | 3.05865  |
| H  | 0.68488  | -2.13634 | 2.59638  |

**Coordination through  $\pi(C=P)$  bond**

**R= H**

|    |          |          |          |
|----|----------|----------|----------|
| P  | 0.71190  | 0.02870  | 0.95480  |
| C  | 0.45534  | 0.14994  | -0.74532 |
| P  | -1.12538 | -0.01599 | -1.52261 |
| Pb | 1.72936  | -0.11019 | -2.80305 |
| Cl | 1.22184  | -2.57029 | -2.76297 |
| C  | -2.54588 | 0.69910  | -0.67541 |
| H  | -3.45295 | 0.43910  | -1.22450 |
| H  | -2.60502 | 0.30165  | 0.34060  |
| H  | -2.43912 | 1.78403  | -0.64370 |
| Au | 0.75511  | 2.17804  | -0.08335 |
| Cl | 1.00332  | 4.41659  | -0.07816 |
| H  | -1.37607 | -1.40197 | -1.50561 |
| H  | 2.13478  | -0.11128 | 0.94769  |
| S  | -0.89044 | 0.66737  | -3.38259 |

**R = Me**

|    |          |          |          |
|----|----------|----------|----------|
| P  | 0.77593  | 0.11547  | 0.85041  |
| C  | 0.38322  | 0.23386  | -0.81850 |
| P  | -1.23940 | -0.09104 | -1.45939 |
| Pb | 1.57510  | 0.02904  | -2.92687 |
| Cl | 1.69411  | -2.48431 | -2.66900 |
| C  | -2.57875 | 0.84934  | -0.69683 |
| H  | -3.52692 | 0.53548  | -1.13857 |
| H  | -2.59607 | 0.66389  | 0.37956  |
| H  | -2.42993 | 1.91294  | -0.88387 |
| C  | -1.60580 | -1.82404 | -1.13002 |
| H  | -1.70095 | -1.98595 | -0.05393 |
| H  | -2.53703 | -2.09032 | -1.63308 |
| H  | -0.78910 | -2.42911 | -1.52918 |
| C  | 2.59783  | -0.10104 | 0.89264  |
| H  | 3.10398  | 0.26685  | 0.00013  |
| H  | 3.00229  | 0.39441  | 1.77756  |
| H  | 2.78690  | -1.17525 | 0.99054  |
| Au | 0.59596  | 2.27871  | -0.17483 |
| Cl | 0.71870  | 4.53031  | -0.12203 |
| S  | -1.12621 | 0.27723  | -3.42988 |

**R = t-Bu**

|    |          |          |          |
|----|----------|----------|----------|
| P  | 0.66781  | 0.16455  | 0.74397  |
| C  | 0.35330  | 0.28551  | -0.94322 |
| P  | -1.24373 | -0.12621 | -1.63615 |
| Pb | 1.57779  | 0.63070  | -3.03908 |
| Cl | 2.50096  | -1.71395 | -3.26036 |
| C  | -2.59386 | 0.86952  | -0.95208 |
| H  | -3.54417 | 0.53134  | -1.36860 |
| H  | -2.61651 | 0.79322  | 0.13594  |
| H  | -2.43515 | 1.90874  | -1.24063 |
| Au | 0.34824  | 2.33850  | -0.22240 |
| Cl | 0.29712  | 4.59095  | -0.08066 |
| C  | 2.51430  | 0.09591  | 1.05225  |
| C  | 2.77073  | -1.38455 | 1.36130  |
| C  | 3.41676  | 0.55117  | -0.07938 |
| C  | 2.75442  | 0.93607  | 2.30720  |
| H  | 2.12380  | -1.75461 | 2.16200  |
| H  | 2.62545  | -2.01009 | 0.47694  |
| H  | 3.80706  | -1.50806 | 1.69159  |
| H  | 3.20930  | 1.58261  | -0.37776 |
| H  | 4.46096  | 0.51258  | 0.24897  |
| H  | 3.33727  | -0.11155 | -0.94508 |
| H  | 3.78345  | 0.79377  | 2.65141  |
| H  | 2.60782  | 2.00138  | 2.11260  |
| H  | 2.08705  | 0.64623  | 3.12382  |
| C  | -1.69852 | -1.90087 | -1.30691 |
| C  | -2.87561 | -2.25911 | -2.21542 |
| C  | -0.51088 | -2.79768 | -1.64013 |
| C  | -2.10368 | -2.07634 | 0.15583  |
| H  | -3.76241 | -1.65453 | -2.01174 |
| H  | -2.61694 | -2.15196 | -3.26949 |
| H  | -3.14326 | -3.30393 | -2.03373 |
| H  | 0.34285  | -2.61218 | -0.98705 |
| H  | -0.81449 | -3.84059 | -1.51042 |
| H  | -0.17294 | -2.66708 | -2.66880 |
| H  | -2.29767 | -3.13782 | 0.33520  |
| H  | -1.31847 | -1.76420 | 0.84815  |
| H  | -3.01680 | -1.53052 | 0.40117  |
| S  | -1.08330 | 0.22792  | -3.61244 |

**R = Ph**

|   |         |         |         |
|---|---------|---------|---------|
| P | 0.72375 | 0.37861 | 0.77424 |
|---|---------|---------|---------|

|    |          |          |          |
|----|----------|----------|----------|
| C  | 0.24532  | 0.30548  | -0.87592 |
| P  | -1.41206 | -0.02443 | -1.41272 |
| Pb | 1.31836  | 0.25181  | -3.06619 |
| Cl | 1.53097  | -2.26320 | -3.21166 |
| C  | -2.69582 | 0.89906  | -0.53737 |
| H  | -3.66994 | 0.58656  | -0.91791 |
| H  | -2.64233 | 0.70123  | 0.53493  |
| H  | -2.55454 | 1.96471  | -0.72092 |
| Au | 0.48533  | 2.42471  | -0.45387 |
| Cl | 0.59687  | 4.67019  | -0.65443 |
| C  | -1.76789 | -1.76632 | -1.08052 |
| C  | -1.92736 | -2.66716 | -2.12593 |
| C  | -1.88431 | -2.20334 | 0.23925  |
| C  | -2.21191 | -3.99706 | -1.85334 |
| H  | -1.81703 | -2.32461 | -3.14755 |
| C  | -2.16826 | -3.53145 | 0.50518  |
| H  | -1.74338 | -1.51408 | 1.06554  |
| C  | -2.33393 | -4.42853 | -0.54241 |
| H  | -2.32926 | -4.69770 | -2.67149 |
| H  | -2.25713 | -3.86834 | 1.53140  |
| H  | -2.55306 | -5.46918 | -0.33226 |
| C  | 2.52810  | 0.16789  | 0.74943  |
| C  | 3.15953  | -0.74038 | -0.10179 |
| C  | 3.28532  | 0.87120  | 1.68834  |
| C  | 4.53374  | -0.91324 | -0.03386 |
| H  | 2.57788  | -1.33785 | -0.79721 |
| C  | 4.65922  | 0.70690  | 1.74000  |
| H  | 2.79789  | 1.56197  | 2.36929  |
| C  | 5.28444  | -0.18428 | 0.87777  |
| H  | 5.01595  | -1.62523 | -0.69388 |
| H  | 5.24379  | 1.27177  | 2.45691  |
| H  | 6.35908  | -0.31866 | 0.92492  |
| S  | -1.43805 | 0.40966  | -3.36943 |

**R = Mes**

|    |          |          |          |
|----|----------|----------|----------|
| P  | 0.75184  | 0.40808  | 1.24836  |
| C  | 0.09345  | 0.31669  | -0.34595 |
| P  | -1.53544 | 0.01358  | -1.00002 |
| Pb | 1.32059  | 0.68983  | -2.41581 |
| Cl | 1.52042  | -1.70126 | -3.23796 |
| Au | 0.10219  | 2.43967  | 0.17351  |
| Cl | -0.12498 | 4.69364  | 0.13785  |
| C  | -1.85174 | -1.78978 | -1.03537 |
| C  | -2.02567 | -2.53272 | -2.22838 |
| C  | -1.91791 | -2.46403 | 0.20524  |
| C  | -2.18180 | -3.91092 | -2.13369 |
| C  | -2.06462 | -3.84578 | 0.22715  |
| C  | -2.18021 | -4.59576 | -0.92947 |
| H  | -2.30811 | -4.47002 | -3.05515 |
| H  | -2.09934 | -4.34424 | 1.19127  |
| C  | 2.55333  | 0.25880  | 0.96092  |
| C  | 3.03854  | -0.99883 | 0.54930  |
| C  | 3.45265  | 1.28771  | 1.28651  |
| C  | 4.40601  | -1.15847 | 0.36701  |
| C  | 4.81142  | 1.07576  | 1.08448  |
| C  | 5.30779  | -0.12821 | 0.60316  |
| H  | 4.77701  | -2.12801 | 0.04829  |
| H  | 5.50396  | 1.87670  | 1.32638  |
| C  | 3.00584  | 2.60110  | 1.85540  |
| H  | 2.67005  | 3.29453  | 1.07835  |
| H  | 2.17491  | 2.48346  | 2.55600  |
| H  | 3.82691  | 3.08217  | 2.38925  |
| C  | 2.13858  | -2.18615 | 0.36251  |
| H  | 1.38933  | -2.25456 | 1.15730  |
| H  | 1.60592  | -2.15789 | -0.59110 |
| H  | 2.72496  | -3.10574 | 0.38110  |

|   |          |          |          |
|---|----------|----------|----------|
| C | 6.77264  | -0.31698 | 0.35744  |
| H | 7.08231  | -1.34331 | 0.56323  |
| H | 7.01793  | -0.10733 | -0.68848 |
| H | 7.37090  | 0.35469  | 0.97529  |
| C | -1.91818 | -1.80324 | 1.55525  |
| H | -1.48239 | -2.47309 | 2.29802  |
| H | -1.36525 | -0.86856 | 1.60868  |
| H | -2.94563 | -1.60029 | 1.87425  |
| C | -2.29389 | -6.08686 | -0.88655 |
| H | -2.97071 | -6.45618 | -1.65937 |
| H | -1.31784 | -6.54975 | -1.06193 |
| H | -2.65411 | -6.43316 | 0.08338  |
| C | -2.08987 | -1.96934 | -3.61794 |
| H | -2.81748 | -1.16373 | -3.70781 |
| H | -1.12401 | -1.57708 | -3.93612 |
| H | -2.37402 | -2.76363 | -4.30915 |
| C | -2.94542 | 0.75980  | -0.13358 |
| H | -3.04889 | 0.40729  | 0.89004  |
| H | -2.81522 | 1.84275  | -0.14350 |
| H | -3.84477 | 0.50430  | -0.69870 |
| S | -1.41425 | 0.99806  | -2.75621 |

**R = Mes\***

|    |          |          |          |
|----|----------|----------|----------|
| P  | 0.67171  | 0.04588  | 1.11078  |
| C  | 0.41989  | 0.07081  | -0.60738 |
| P  | -1.09329 | -0.05353 | -1.61641 |
| Pb | 2.09438  | 0.60238  | 2.37114  |
| Cl | 3.10065  | -1.50302 | -3.39810 |
| Au | 0.44919  | 2.18071  | -0.01555 |
| Cl | 0.27929  | 4.44037  | -0.21780 |
| C  | 2.52413  | -0.02892 | 1.23754  |
| C  | 3.22640  | -1.15954 | 0.73659  |
| C  | 3.27627  | 1.09920  | 1.64729  |
| C  | 4.53111  | -0.97928 | 0.29938  |
| C  | 4.58794  | 1.20860  | 1.17814  |
| C  | 5.21037  | 0.22842  | 0.42492  |
| H  | 5.04664  | -1.82611 | -0.13443 |
| H  | 5.14252  | 2.10048  | 1.43356  |
| C  | 2.88326  | 2.13261  | 2.72549  |
| C  | 2.76337  | -2.61971 | 0.90343  |
| C  | 6.59996  | 0.39663  | -0.17915 |
| C  | 3.83707  | 1.86373  | 3.90788  |
| H  | 3.71444  | 0.84555  | 4.28602  |
| H  | 4.88295  | 1.99392  | 3.62747  |
| H  | 3.61526  | 2.55993  | 4.72140  |
| C  | 3.08413  | 3.57699  | 2.25877  |
| H  | 2.43449  | 3.82869  | 1.41938  |
| H  | 2.84528  | 4.26060  | 3.07811  |
| H  | 4.11516  | 3.77512  | 1.96165  |
| C  | 1.47479  | 1.99999  | 3.29679  |
| H  | 1.38867  | 2.65423  | 4.16859  |
| H  | 0.69628  | 2.31380  | 2.59806  |
| H  | 1.25786  | 0.98184  | 3.62866  |
| C  | 3.05603  | -3.48275 | -0.32499 |
| H  | 2.59919  | -3.07644 | -1.22562 |
| H  | 4.12579  | -3.57772 | -0.51683 |
| H  | 2.67030  | -4.49248 | -0.15921 |
| C  | 3.58556  | -3.16455 | 2.08795  |
| H  | 4.65647  | -3.11931 | 1.88333  |
| H  | 3.39164  | -2.59244 | 2.99898  |
| H  | 3.31663  | -4.20853 | 2.27443  |
| C  | 1.29878  | -2.79977 | 1.28359  |
| H  | 1.03635  | -2.24503 | 2.19039  |
| H  | 0.61951  | -2.51480 | 0.48112  |
| H  | 1.11517  | -3.85615 | 1.49929  |
| C  | 7.21267  | 1.75563  | 0.14815  |

|   |          |          |          |
|---|----------|----------|----------|
| H | 6.59517  | 2.57894  | -0.21945 |
| H | 7.36138  | 1.88899  | 1.22306  |
| H | 8.19087  | 1.83829  | -0.33144 |
| C | 6.48752  | 0.26917  | -1.70332 |
| H | 7.47804  | 0.34031  | -2.16159 |
| H | 6.03985  | -0.68029 | -2.00306 |
| H | 5.86826  | 1.06998  | -2.11614 |
| C | 7.53954  | -0.69210 | 0.35242  |
| H | 7.62124  | -0.64282 | 1.44123  |
| H | 7.19898  | -1.69367 | 0.08367  |
| H | 8.53936  | -0.56040 | -0.07007 |
| C | -2.34181 | -1.44259 | -1.66568 |
| C | -2.32116 | -2.33186 | -2.78002 |
| C | -3.58667 | -1.26056 | -1.00058 |
| C | -3.52544 | -2.60525 | -3.41372 |
| C | -1.13202 | -3.20492 | -3.22215 |
| C | -4.75310 | -1.59272 | -1.68420 |
| C | -3.78600 | -0.92527 | 0.49153  |
| C | -4.75481 | -2.16379 | -2.94629 |
| H | -3.49421 | -3.21834 | -4.30595 |
| C | -0.72275 | -3.00461 | -4.68272 |
| C | -1.60646 | -4.66569 | -3.05993 |
| C | 0.07241  | -3.07197 | -2.30744 |
| H | -5.69773 | -1.40197 | -1.19399 |
| C | -2.49829 | -0.65451 | 1.25173  |
| C | -4.37131 | -2.20936 | 1.11665  |
| C | -4.78013 | 0.21352  | 0.73977  |
| C | -6.02377 | -2.40579 | -3.75307 |
| H | 0.02340  | -3.75553 | -4.95488 |
| H | -1.57424 | -3.12171 | -5.35738 |
| H | -0.28648 | -2.02148 | -4.84501 |
| H | -2.40271 | -4.92961 | -3.75694 |
| H | -0.76215 | -5.33336 | -3.25126 |
| H | -1.96669 | -4.85439 | -2.04548 |
| H | 0.53327  | -2.08821 | -2.34524 |
| H | -0.20336 | -3.30829 | -1.27758 |
| H | 0.84319  | -3.77880 | -2.61976 |
| H | -1.76468 | -1.44466 | 1.08076  |
| H | -2.03607 | 0.30136  | 1.01182  |
| H | -2.70518 | -0.62958 | 2.32427  |
| H | -4.50751 | -2.06075 | 2.19151  |
| H | -5.33759 | -2.47286 | 0.68545  |
| H | -3.69513 | -3.05521 | 0.97189  |
| H | -5.76475 | -0.00314 | 0.32244  |
| H | -4.90735 | 0.35574  | 1.81612  |
| H | -4.44583 | 1.16188  | 0.31766  |
| C | -7.26169 | -1.83218 | -3.06884 |
| C | -6.23399 | -3.91195 | -3.94938 |
| C | -5.87197 | -1.73215 | -5.12217 |
| H | -7.46561 | -2.32286 | -2.11361 |
| H | -7.16533 | -0.75806 | -2.89151 |
| H | -8.13508 | -1.98597 | -3.70688 |
| H | -5.40313 | -4.37140 | -4.48818 |
| H | -6.33510 | -4.42218 | -2.98834 |
| H | -7.14484 | -4.09093 | -4.52731 |
| H | -5.73649 | -0.65325 | -5.01491 |
| H | -5.01340 | -2.12313 | -5.67155 |
| H | -6.76602 | -1.90502 | -5.72747 |
| S | -0.37611 | 0.24405  | -3.48899 |
| C | -2.21269 | 1.37576  | -1.42878 |
| H | -2.61537 | 1.49980  | -0.42841 |
| H | -1.66084 | 2.26999  | -1.71735 |
| H | -3.02664 | 1.22274  | -2.13958 |
